# Supplementary material for: Ni-catalyzed asymmetric hydrophosphinylation of conjugated enynes and mechanistic studies
Source: Royal Society of Chemistry journal article supplement (doi:10.1039/d2sc00091a), 2022-01-01
Supplement: d2sc00091a1.pdf [file d2sc00091a1.pdf]

**Supplementary Information for**  
**Ni-Catalyzed Asymmetric Hydrophosphinylation of Conjugated**  
**Enynes and Mechanistic Studies**

Ya-Qian Zhang<sup>†</sup>, Xue-Yu Han<sup>†</sup>, Yue Wu, Peng-Jia Qi, Qing Zhang & Qing-Wei Zhang\*

Department of Chemistry, University of Science and Technology of China, Hefei, Anhui 230026

\*Corresponding Author: qingweiz@ustc.edu.cn

<sup>†</sup>Y.-Q. Z. and X.-Y. H. contributed equally to this work

# INDEX

|                                                                        |           |
|------------------------------------------------------------------------|-----------|
| <b>1. General information .....</b>                                    | <b>3</b>  |
| <b>2. Optimization of reaction conditions.....</b>                     | <b>4</b>  |
| <b>3. General procedure for the synthesis of racemic products.....</b> | <b>5</b>  |
| <b>4. General procedure for the synthesis of chiral products.....</b>  | <b>6</b>  |
| <b>5. Synthetic applications.....</b>                                  | <b>7</b>  |
| <b>6. Mechanism experiments.....</b>                                   | <b>8</b>  |
| <b>7. DFT Computational Studies.....</b>                               | <b>17</b> |
| <b>8. X-ray crystal structure of 3ka (ORTEP drawing).....</b>          | <b>32</b> |
| <b>9. Spectroscopic data of products.....</b>                          | <b>33</b> |
| <b>10. Supplementary references.....</b>                               | <b>49</b> |

## 1. General Information

All reagents were obtained commercially unless otherwise noted. All reactions under standard conditions were monitored by thin-layer chromatography (TLC) on gel F<sub>254</sub> plates. The silica gel (300-400 meshes) was used for column chromatography, and the distillation range of petroleum ether was 60-90 °C. Mesitylene was purchased and used directly. <sup>1</sup>H, <sup>13</sup>C, <sup>31</sup>P, <sup>11</sup>B and <sup>19</sup>F NMR spectra were recorded in CDCl<sub>3</sub> or C<sub>6</sub>D<sub>6</sub> solution on Bruker Aescend™ 400 MHz and 500MHz instruments and spectral data were reported in ppm. The residual solvent peak or tetramethylsilane (TMS) was used as an internal reference: proton (TMS δ 0.0) and carbon (CDCl<sub>3</sub> δ 77.0). High-resolution mass spectral analysis (HRMS) data were measured by means of the ESI technique. Enantiomer excess was determined by HPLC analysis employing Darcel Chiracel columns (AD-H, OD-H, OJ-H, IH-3 and AS-H) and *n*-Hexane/*i*-PrOH as eluents. Optical rotations were measured by Perkin-Elmer-343 polarimeter.

Enynes were prepared according to the reference 1 and phosphine oxides were prepared according to the reference 2 and 3.

## 2. Optimization of reaction conditions

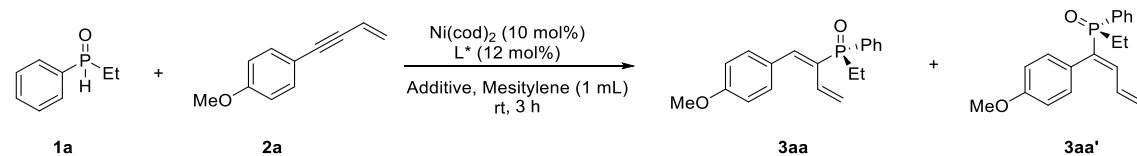

| Entry <sup>a</sup>   | Ligand    | Additive                        | Solvent    | Yield (%) <sup>b</sup>   | rr <sup>c</sup> | ee (%) <sup>d</sup> |             |
|----------------------|-----------|---------------------------------|------------|--------------------------|-----------------|---------------------|-------------|
|                      |           |                                 |            |                          |                 | <b>3aa</b>          | <b>3aa'</b> |
| 1                    | <b>L1</b> | KOAc                            | Mesitylene | trace                    | --              | --                  | --          |
| 2                    | <b>L2</b> | KOAc                            | Mesitylene | 8%                       | 1:1             | 3%                  | nd          |
| 3                    | <b>L3</b> | KOAc                            | Mesitylene | 90%                      | >20:1           | 35%                 | --          |
| 4                    | <b>L4</b> | KOAc                            | Mesitylene | 83%                      | >20:1           | 82%                 | --          |
| 5                    | <b>L5</b> | KOAc                            | Mesitylene | <5%                      | >20:1           | --                  | --          |
| 6                    | <b>L6</b> | KOAc                            | Mesitylene | trace                    | --              | --                  | --          |
| 7                    | <b>L4</b> | none                            | Mesitylene | 78%                      | >20:1           | 54%                 | --          |
| 8                    | <b>L4</b> | K <sub>2</sub> HPO <sub>4</sub> | Mesitylene | 74%                      | >20:1           | 80%                 | --          |
| 9                    | <b>L4</b> | KH <sub>2</sub> PO <sub>4</sub> | Mesitylene | 78%                      | >20:1           | 59%                 | --          |
| 10                   | <b>L4</b> | Ph <sub>2</sub> P(O)OH          | Mesitylene | <5%                      | 1:1             | -14%                | nd          |
|                      |           |                                 |            | 41% <sup>e</sup>         |                 | -21% <sup>e</sup>   |             |
| 11                   | <b>L4</b> | K <sub>3</sub> PO <sub>4</sub>  | Mesitylene | 70%                      | >20:1           | 71%                 | --          |
| 12                   | <b>L4</b> | <i>t</i> -BuCO <sub>2</sub> K   | Mesitylene | 66%                      | >20:1           | 86%                 | --          |
| 13 <sup>f</sup>      | <b>L4</b> | <i>t</i> -BuCO <sub>2</sub> K   | Mesitylene | 72%                      | >20:1           | 88%                 | --          |
| 14 <sup>f</sup>      | <b>L4</b> | <i>t</i> -BuCO <sub>2</sub> K   | DCM        | trace                    | --              | --                  | --          |
| 15 <sup>f</sup>      | <b>L4</b> | <i>t</i> -BuCO <sub>2</sub> K   | Dioxane    | 9%                       | >20:1           | 69%                 | --          |
| 16 <sup>f</sup>      | <b>L4</b> | <i>t</i> -BuCO <sub>2</sub> K   | THF        | 35%                      | >20:1           | 58%                 | --          |
| 17 <sup>f-h</sup>    | <b>L4</b> | <i>t</i> -BuCO <sub>2</sub> K   | Mesitylene | 60%                      | >20:1           | 91%                 | --          |
| 18 <sup>f-i</sup>    | <b>L4</b> | <i>t</i> -BuCO <sub>2</sub> K   | Mesitylene | >95% (89% <sup>j</sup> ) | >20:1           | 91%                 | --          |
| 19 <sup>f-i, k</sup> | <b>L4</b> | <i>t</i> -BuCO <sub>2</sub> K   | Mesitylene | 41%                      | >20:1           | 94%                 | --          |

<sup>a</sup>Reaction conditions: **1a** (0.1 mmol), **2a** (0.12 mmol), [Ni] (10 mol %), L (12 mol %), Additive (1.5 equiv), solvent (1.0 mL), 3 h. <sup>b</sup>NMR yield and with PO(OMe)<sub>3</sub> as internal standard. <sup>c</sup>Determined by <sup>1</sup>H NMR analysis of crude reaction mixture. <sup>d</sup>Determined by chiral HPLC analysis. <sup>e</sup>24 h. <sup>f</sup>*t*-BuCO<sub>2</sub>K 2 equiv. <sup>g</sup>-20 °C. <sup>h</sup>5d. <sup>i</sup>**1a** (0.2 mmol), **2a** (0.1 mmol). <sup>j</sup>Isolated yield. <sup>k</sup>Ni(stb<sup>F</sup>)<sub>3</sub> instead of Ni(cod)<sub>2</sub>.

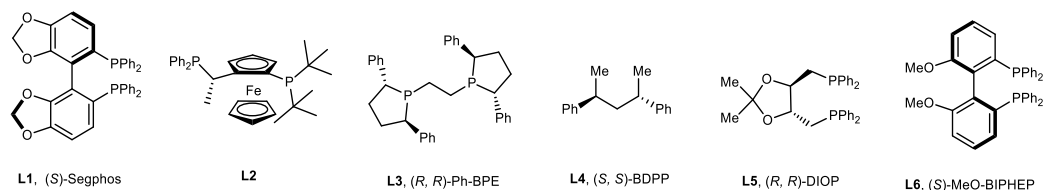

### 3. General procedure for the synthesis of racemic products.

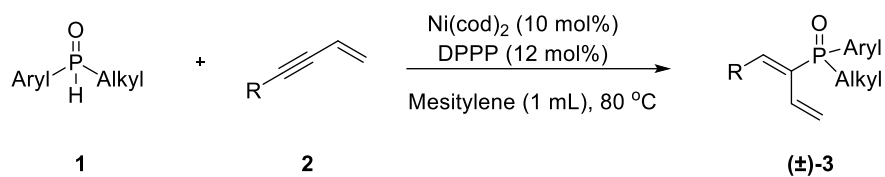

To a 4 mL vial were added Ni(cod)<sub>2</sub> (2.8 mg, 0.01 mmol), DPPP (4.9 mg, 0.012 mmol), and mesitylene (1 mL) in a N<sub>2</sub> flushed glove box. The mixture was stirred for 10 minutes followed by the addition of enynes (0.12 mmol) and SPOs (0.1 mmol). The vial was capped, removed from the glove box, and the system was stirred at 80 °C overnight. The reaction mixture was cooled to room temperature and subjected to silica gel column chromatography directly for purification.

#### 4. General procedure for the synthesis of chiral products.

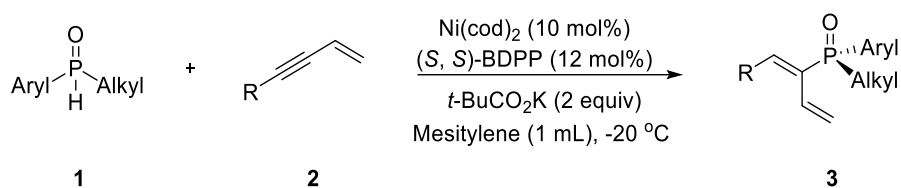

To a 4 mL vial were added  $\text{Ni(cod)}_2$  (2.8 mg, 0.01 mmol), (*S, S*)-BDPP (5.3 mg, 0.012 mmol) and mesitylene (1 mL) in a  $\text{N}_2$  flushed glove box. The mixture was stirred for 10 minutes, cooled to  $-20^\circ\text{C}$  in the glove box followed by the addition of enynes (0.1 mmol), *t*-BuCO<sub>2</sub>K (28.0 mg, 2 mmol) and SPO (0.2 mmol). The vial was rapidly capped, removed from the glove box, and the system was stirred at  $-20^\circ\text{C}$  for 5 days. The reaction mixture was subjected to silica gel column chromatography directly for purification.

## 5. Synthetic applications.

### 5.1 1 mmol-scale synthesis.

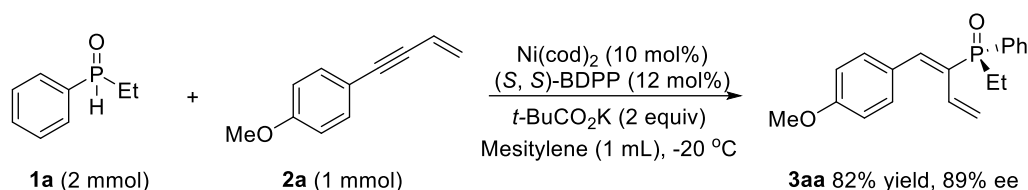

To a 25 mL vial were added Ni(cod)<sub>2</sub> (27.5 mg, 0.01 mmol), (*S, S*)-BDPP (53.0 mg, 0.012 mmol) and mesitylene (10 mL) in a N<sub>2</sub> flushed glove box. The mixture was stirred for 10 minutes, cooled to -20 °C in the glovebox followed by the addition of **2a** (158.0mg, 1 mmol), *t*-BuCO<sub>2</sub>K (280.0 mg, 2 mmol) and **1a** (308.0 mg, 2 mmol). The vial was rapidly capped, removed from the glove box, and the system was stirred at -20 °C until disappearance of **2a** by TLC. The reaction mixture was subjected to silica gel column chromatography directly for purification to afford **3aa** (256.8 mg, 89% ee).

### 5.2 Compound 4.

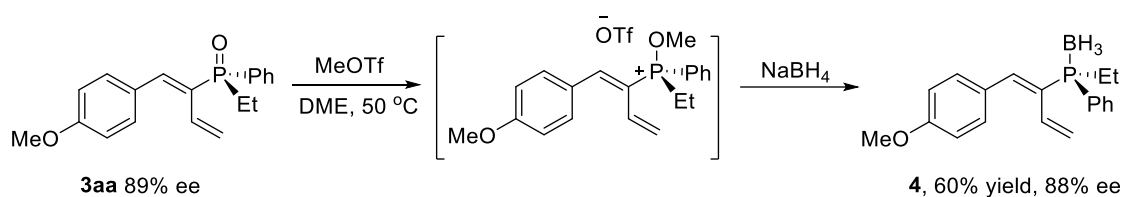

According to reference 4, to a stirred solution of tertiary phosphine oxide **3aa** (31.2 mg, 0.1 mmol) in DME (0.5 mL) was added MeOTf (13.6 μL, 0.12 mmol) dropwise at room temperature under N<sub>2</sub>. The reaction was heated at 50 °C overnight. After cooling to room temperature, a dispersion of NaBH<sub>4</sub> (11.3 mg, 0.3 mmol) in diglyme (0.5 mL) was added dropwise to the vial. The reaction mixture was stirred for additional 3 hours at 50 °C before being cooled to room temperature and diluted with DCM (5 mL). Water was then added dropwise to quench the remaining NaBH<sub>4</sub>. The mixture was washed with water (5mL x 3) and the organic layer was dried over anhydrous MgSO<sub>4</sub> and removed in vacuo. The residue was purified by silica gel column chromatography afford the desired product **4** in 60% yield (18.6 mg) with 88% ee.

### 5.3 Compound 5.

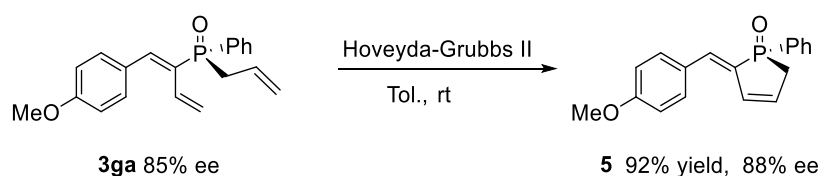

A 4 mL reaction vial equipped with a magnetic stirrer under N<sub>2</sub> was charged with **3ga** (85% ee, 32.4 mg, 0.1 mmol) and Hoveyda-Grubbs II (3.1 mg, 0.005 mmol). toluene (1 mL) was added as solvent and the reaction mixture was stirred at rt for 5 min. The resulting mixture was subjected to column chromatography to afford the adduct **5** in 92% yield (27.3 mg) with 88% ee.

## 6. Mechanism experiments.

### 6.1. Identification of the Catalyst Resting State.

#### 6.1.1 The NMR of the reaction mixture.

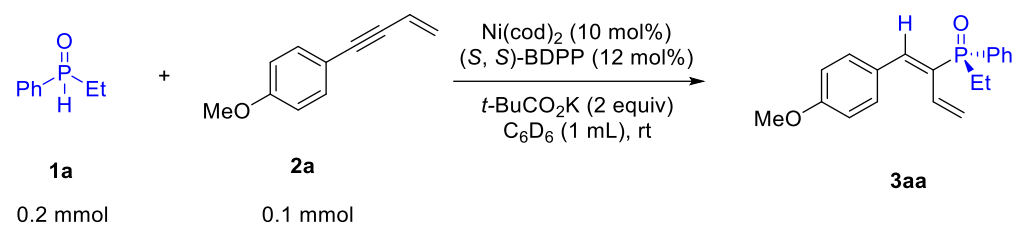

According to standard condition except that the solvent was replaced with  $\text{C}_6\text{D}_6$  and the temperature is room temperature.

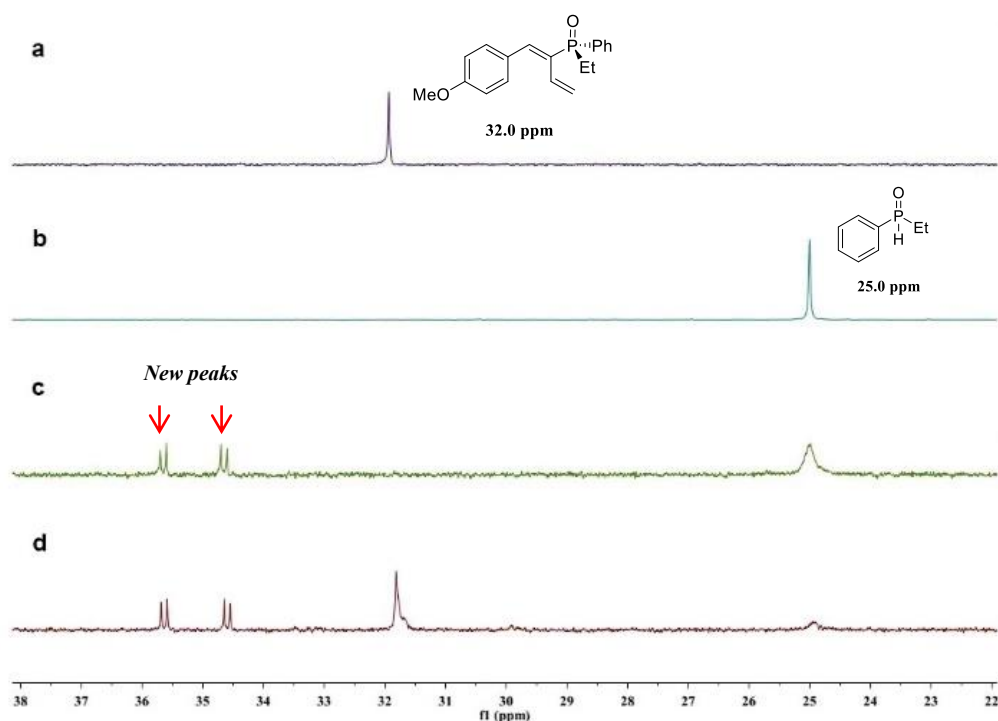

**Supplementary Figure 1.** (a)  $^{31}\text{P}$  NMR spectra of **3aa** and (b) **1a**; (c)  $^{31}\text{P}$  NMR spectra of reaction mixture in 10 minutes and (d)  $^{31}\text{P}$  NMR spectra of reaction mixture in 6 hours.

#### 6.1.2 Control experiments (Supplementary Figure 2).



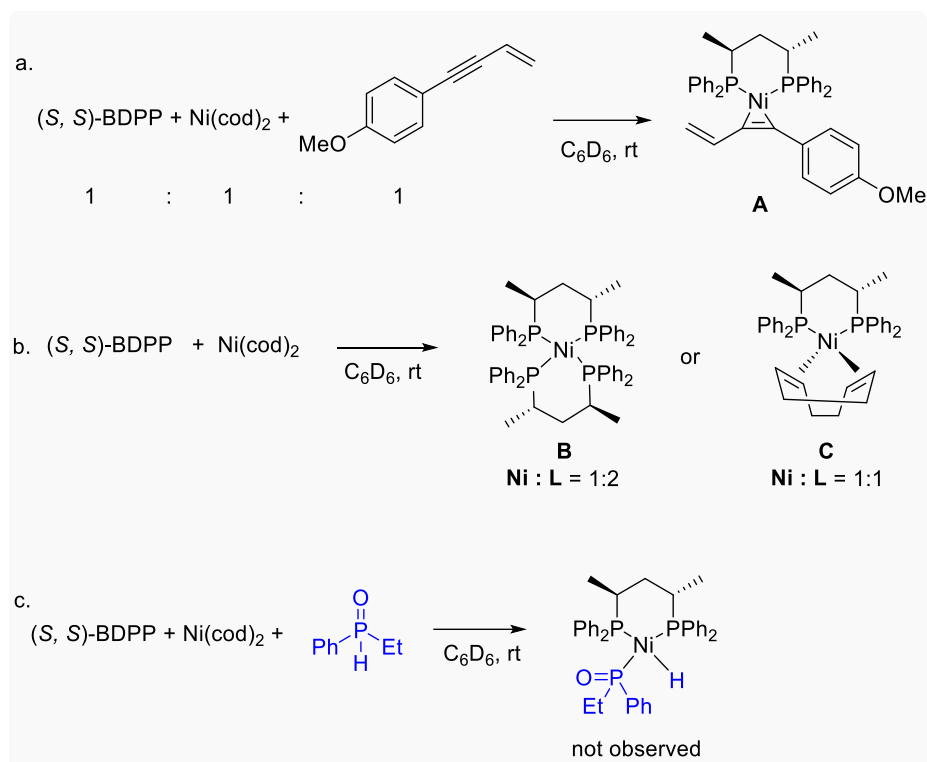

**Supplementary Figure 2.** Three possible pathways can lead to the formation of the catalyst resting state.

### 6.1.3 The <sup>31</sup>P NMR of the mixture of the $(S, S)$ -BDPP and Ni(cod)<sub>2</sub>.

**Preparation:** To a 4 mL vial were added Ni(cod)<sub>2</sub> (13.8 mg, 0.05 mmol),  $(S, S)$ -BDPP (44.0 mg, 0.1 mmol) and C<sub>6</sub>D<sub>6</sub> (1 mL) in a N<sub>2</sub> flushed glove box, another 4 mL vial were added Ni(cod)<sub>2</sub> (13.8 mg, 0.05 mmol),  $(S, S)$ -BDPP (22.0 mg, 0.05 mmol) and C<sub>6</sub>D<sub>6</sub> (1 mL) in a N<sub>2</sub> flushed glove box. Then the mixture were stirred at rt overnight and tested by NMR. The <sup>31</sup>P NMR with <sup>1</sup>H-decoupling of the mixture was obtained in **Supplementary Figure 3a** and **b**.

### 6.1.4 The <sup>31</sup>P NMR of the mixture of the $(S, S)$ -BDPP, Ni(cod)<sub>2</sub> and enyne **2a**.

**Preparation:** To a 4 mL vial were added Ni(cod)<sub>2</sub> (13.8 mg, 0.05 mmol),  $(S, S)$ -BDPP (22.0 mg, 0.05 mmol) and C<sub>6</sub>D<sub>6</sub> (0.5 mL) in a N<sub>2</sub> flushed glove box. Then the mixture was stirred for 10 minutes. After that, enyne **2a** (7.9 mg, 0.05 mmol) in C<sub>6</sub>D<sub>6</sub> (0.5 mL) were added, the mixture was stirred at rt overnight and tested by NMR. The <sup>31</sup>P NMR with <sup>1</sup>H-decoupling of the mixture was obtained in **Supplementary Figure 3c**.

### 6.1.5 The <sup>31</sup>P NMR of the mixture of the $(S, S)$ -BDPP, Ni(cod)<sub>2</sub> and SPO **1a**.

**Preparation:** To a 4 mL vial were added Ni(cod)<sub>2</sub> (13.8 mg, 0.05 mmol),  $(S, S)$ -BDPP (22.0 mg, 0.05 mmol) and C<sub>6</sub>D<sub>6</sub> (0.5 mL) in a N<sub>2</sub> flushed glove box. Then the mixture was stirred for 10 minutes. After that, SPO **1a** (7.7 mg, 0.05 mmol) in C<sub>6</sub>D<sub>6</sub> (0.5 mL) were added, the mixture was stirred at rt overnight and tested by NMR. The <sup>31</sup>P NMR of the mixture was obtained in **Supplementary Figure 3d**.

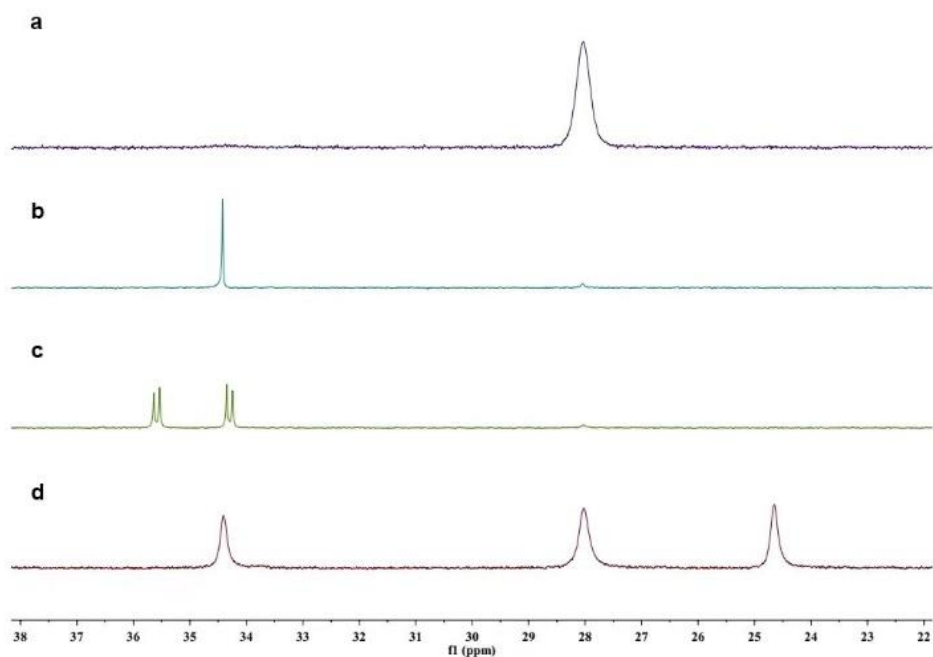

**Supplementary Figure 3.**  $^{31}\text{P}$  NMR spectra of (a)  $(S, S)\text{-BDPP} : \text{Ni}(\text{cod})_2 = 2:1$ ; (b)  $(S, S)\text{-BDPP} : \text{Ni}(\text{cod})_2 = 1:1$ ; (c)  $(S, S)\text{-BDPP} : \text{Ni}(\text{cod})_2 : \mathbf{2a} = 1:1:1$ ; (d)  $(S, S)\text{-BDPP} : \text{Ni}(\text{cod})_2 : \mathbf{1a} = 1:1:1$ .

#### 6.1.6 The $^{31}\text{P}$ NMR of the mixture of the $(S, S)\text{-BDPP}$ , $\text{Ni}(\text{cod})_2$ and enyne $\mathbf{2u}$ .

**Preparation:** To a 4 mL vial were added  $\text{Ni}(\text{cod})_2$  (13.8 mg, 0.05 mmol),  $(S, S)\text{-BDPP}$  (22.0 mg, 0.05 mmol) and  $\text{C}_6\text{D}_6$  (0.5 mL) in a  $\text{N}_2$  flushed glove box. Then the mixture was stirred for 10 minutes. After that, enyne  $\mathbf{2u}$  (6.7 mg, 0.05 mmol) in  $\text{C}_6\text{D}_6$  (0.5 mL) were added, the mixture was stirred at rt overnight and tested by NMR. The  $^{31}\text{P}$  NMR with  $^1\text{H}$ -decoupling of the mixture was obtained in **Supplementary Figure 4**.

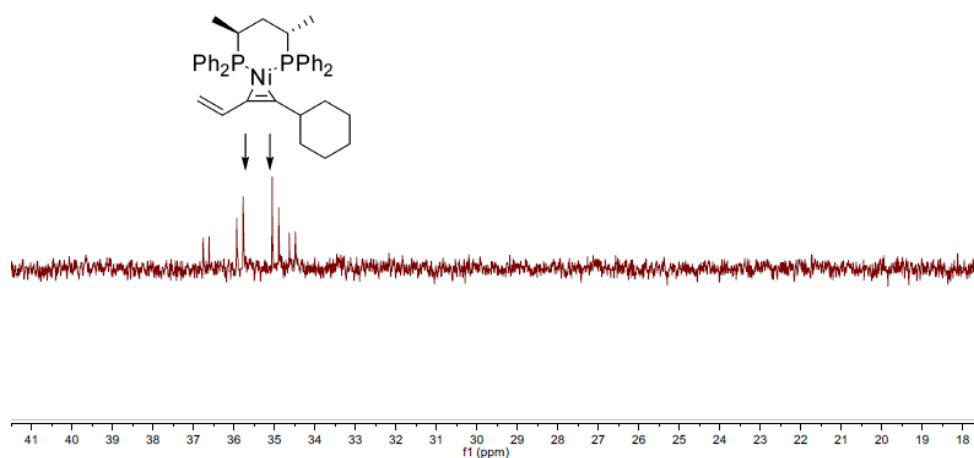

**Supplementary Figure 4.**  $^{31}\text{P}$  NMR spectra of  $(S, S)\text{-BDPP} : \text{Ni}(\text{cod})_2 : \mathbf{2u} = 1:1:1$

## 6.2. Kinetic Studies.

### General procedure of kinetic experiments

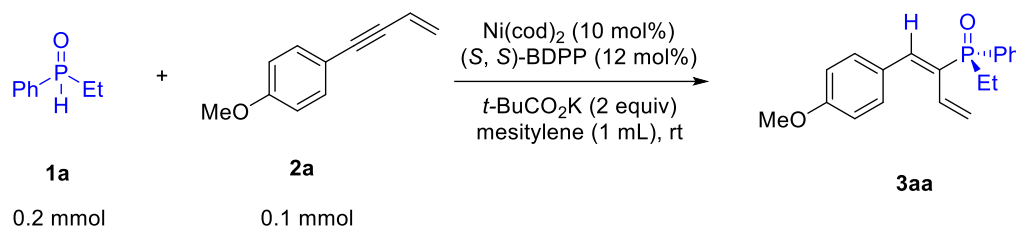

To a 4 mL vial were added Ni(cod)<sub>2</sub> (2.8 mg, 0.01 mmol), (S, S)-BDPP (5.3 mg, 0.012 mmol) and mesitylene (1 mL) in a N<sub>2</sub> flushed glove box. The mixture was stirred for 10 minutes followed by the addition of enynes (0.1 mmol), *t*-BuCO<sub>2</sub>K (28.0 mg, 0.2 mmol) and SPO (0.2 mmol). The vial was capped, removed from the glove box, and the system was stirred at room temperature and the aliquots were analyzed by HPLC.

*Note:* The conversion of the product was detected by HPLC with Inertsil® SIL-100A column. Calibration factors are obtained at 228 nm using triphenyl phosphine oxide as the standard. 10  $\mu$ L mixture was withdrawn at each time point; The wavelength was detected by HPLC, triphenoxyphosphine was used as the internal standard, and the concentration curve was made to ensure a linear relationship within the tested concentration range. The slope of integral of area/concentration between the product and the internal standard is determined to be 1.75. The concentration of the product and the initial rate were thus obtained. For each kinetic experiment we took samples every 5 minutes or 10 minutes, with three samples per experiment. The conversion of the reaction is controlled less than 15% at the end of the sampling to ensure the accuracy of the initial rate.

### 6.2.1 Reaction order in enyne.

According to procedure above except for the varied concentration of enyne **2a**. Kinetic data is shown in **Supplementary Table 1**. Kinetic plots for the reaction order in enyne is shown in **Supplementary Figure 5**.

**Supplementary Table 1.** Initial rate for the formation of **3aa** with varying concentrations of **2a** at rt.

| Conc. of enyne (mmol/mL) | Initial rate (10 <sup>-3</sup> mmol/mL/min) |
|--------------------------|---------------------------------------------|
| 0.03                     | 0.51                                        |
| 0.05                     | 0.53                                        |
| 0.1                      | 0.53                                        |
| 0.15                     | 0.53                                        |
| 0.2                      | 0.52                                        |

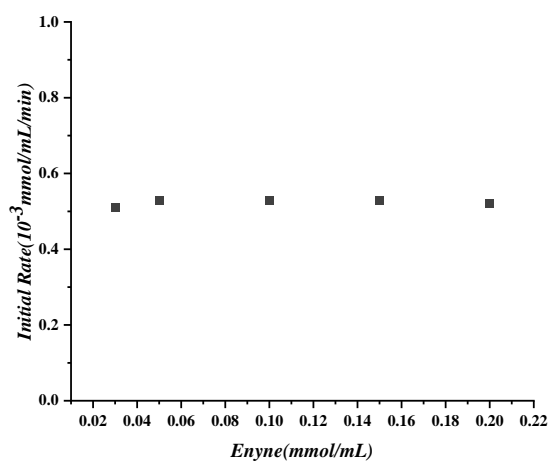

Supplementary Figure 5. Dependence of the initial rate on enyne **2a**

### 6.2.2 Reaction order in SPO

According to procedure above except for the varied concentration of **1a**. Kinetic data is shown in Supplementary Table 2. Kinetic plots for the reaction order in enyne is shown in Supplementary Figure 6.

Supplementary Table 2. Initial Rate for the formation of **3aa** with varying concentrations of **1a** at rt.

| Conc. of SPO (mmol/mL) <sup>a</sup> | Initial rate (10 <sup>-3</sup> mmol/mL/min) |
|-------------------------------------|---------------------------------------------|
| 0.025                               | 0.14                                        |
| 0.05                                | 0.29                                        |
| 0.075                               | 0.46                                        |
| 0.1                                 | 0.57                                        |

<sup>a</sup>Referred to the concentration of (*R*)-**1a**.

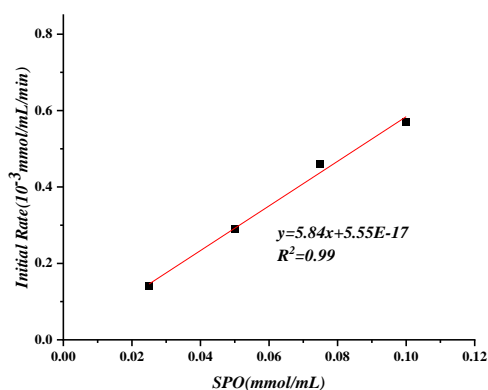

Supplementary Figure 6. Dependence of the initial rate on SPO **1a**.

### 6.2.3 Reaction order in catalyst

According to procedure above except for the varied concentration of Ni(cod)<sub>2</sub> and (S, S)-BDPP. Kinetic data is shown in **Supplementary Table 3**. Kinetic plots for the reaction order in catalyst is shown in **Supplementary Figure 7**.

**Supplementary Table 3.** Initial rate for the formation of **3aa** with varying concentrations of catalyst at rt.

| Conc. of catalyst (10 <sup>-3</sup> mmol/mL) | Initial rate (10 <sup>-3</sup> mmol/mL/min) |
|----------------------------------------------|---------------------------------------------|
| 1                                            | 0.5                                         |
| 1.5                                          | 0.8                                         |
| 2                                            | 1.1                                         |

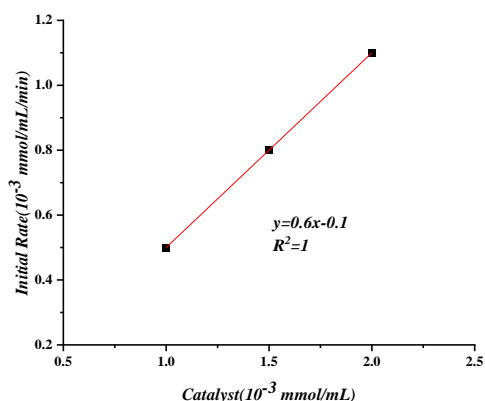

**Supplementary Figure 7.** Dependence of the initial rate on catalyst.

#### 6.2.4 The electronic effects of substituent on enyne.

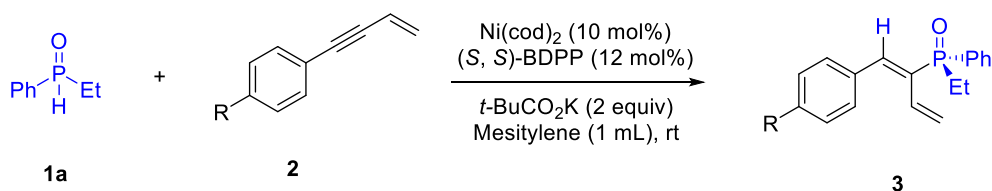

According to the general procedure of the kinetic experiments. Kinetic data is shown in **Supplementary Table 4**. Kinetic plot is shown in **Supplementary Figure 8**.

**Supplementary Table 4.** Initial rate for the formation of **3** with varying concentrations and varying substituent of enyne at rt.

| Conc. of enyne (mmol/mL) | Initial rate <sub>2a</sub> (10 <sup>-3</sup> mmol/mL/min) | Initial rate <sub>2n</sub> (10 <sup>-3</sup> mmol/mL/min) | Initial rate <sub>2h</sub> (10 <sup>-3</sup> mmol/mL/min) |
|--------------------------|-----------------------------------------------------------|-----------------------------------------------------------|-----------------------------------------------------------|
| 0.03                     | 0.51                                                      | 0.45                                                      | 0.27                                                      |
| 0.05                     | 0.53                                                      | 0.48                                                      | 0.27                                                      |
| 0.1                      | 0.53                                                      | 0.43                                                      | 0.28                                                      |
| 0.15                     | 0.53                                                      | 0.44                                                      | 0.26                                                      |
| 0.2                      | 0.52                                                      | 0.42                                                      | 0.27                                                      |

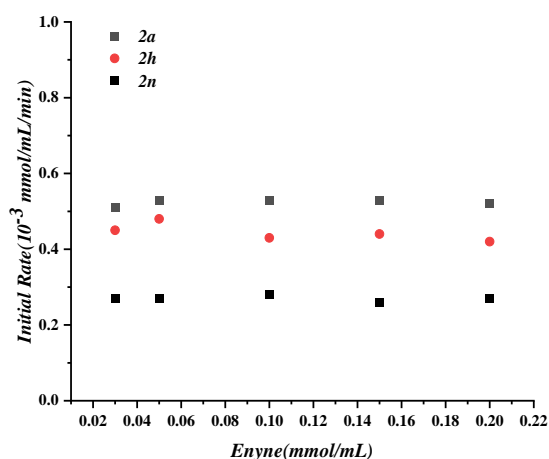

Supplementary Figure 8. Dependence of the initial rate on enynes.

### 6.2.5 The electronic effects of substituent on SPO.

According to the general procedure of the kinetic experiments. Kinetic data is shown in **Supplementary Table 5**. Kinetic plot is shown in **Supplementary Figure 9**.

**Supplementary Table 5**. Initial rate for the formation of **3** with varying concentrations and varying substituent of SPO at rt.

| Conc. of SPO (mmol/mL) | Initial rate <sub>1a</sub> (10 <sup>-3</sup> min <sup>-1</sup> ) | Initial rate <sub>1h</sub> (10 <sup>-3</sup> min <sup>-1</sup> ) | Initial rate <sub>1n</sub> (10 <sup>-3</sup> min <sup>-1</sup> ) |
|------------------------|------------------------------------------------------------------|------------------------------------------------------------------|------------------------------------------------------------------|
| 0.025                  | 0.14                                                             | 0.05                                                             | 0.18                                                             |
| 0.05                   | 0.29                                                             | 0.08                                                             | 0.37                                                             |
| 0.075                  | 0.46                                                             | 0.16                                                             | 0.54                                                             |
| 0.1                    | 0.57                                                             | 0.22                                                             | 0.79                                                             |

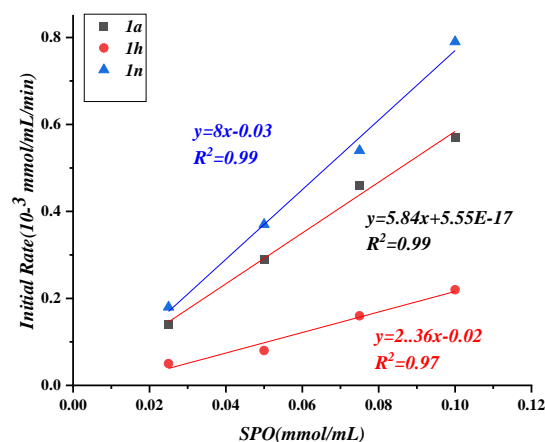

Supplementary Figure 9. Dependence of the initial rate on SPO.

### 6.2.6 The deuteration experiment.

According to the general procedure of the kinetic experiment except *t*-BuCO<sub>2</sub>K was not added in eq. 2. Kinetic Data is shown in **Supplementary Table 6**, Kinetic plots is shown in **Supplementary Figure 10**.

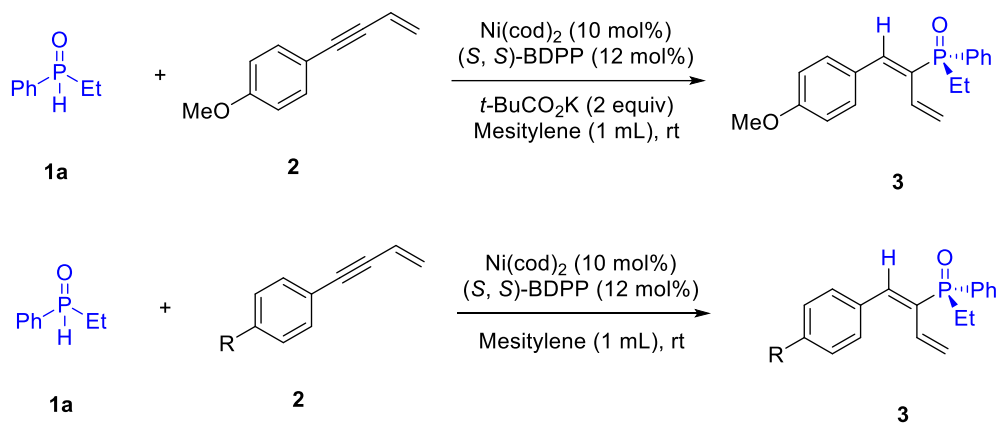

**Supplementary Table 6.** Kinetic data of time-course for the reaction with or without base.

| <i>t</i> (min) | <i>C</i> <sub>with base</sub> (10 <sup>-3</sup> mmol/mL) | <i>C</i> <sub>without base</sub> (10 <sup>-3</sup> mmol/ml) |
|----------------|----------------------------------------------------------|-------------------------------------------------------------|
| 10             | 6.3                                                      | 4.2                                                         |
| 20             | 11.1                                                     | 10.8                                                        |
| 30             | 15.3                                                     | 16.1                                                        |
| 40             | 20.3                                                     | 21.2                                                        |
| 50             | 25.3                                                     | 26.0                                                        |

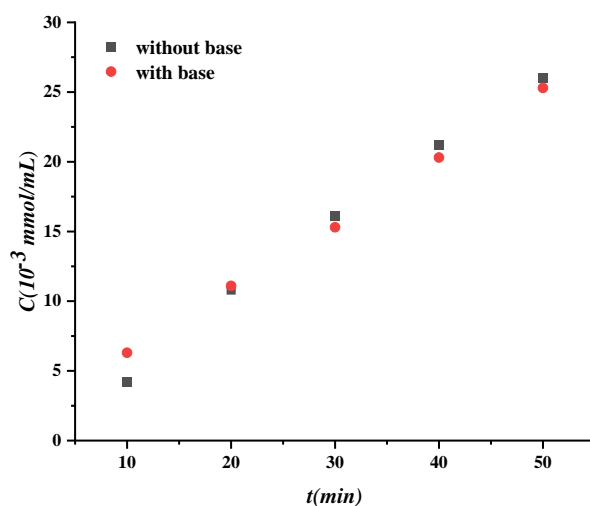

**Supplementary Figure 10.** Time-course for the reaction with or without base.

### Synthesis of deuterated SPO

Dissolve SPO in 1 mL of D<sub>2</sub>O under argon atmosphere and stir at 60 °C for 12 h. After completion of the reaction, the solvent was removed through the vacuum oven to obtain the deuterated SPO ( $\pm$ ) in quantitative yield (96% D).

The deuteration experiment is conducted following the general procedure of the kinetic experiment without *t*-BuCO<sub>2</sub>K. Kinetic data is shown in **Supplementary Table 7**, Kinetic plots is shown in **Supplementary Figure 11**.

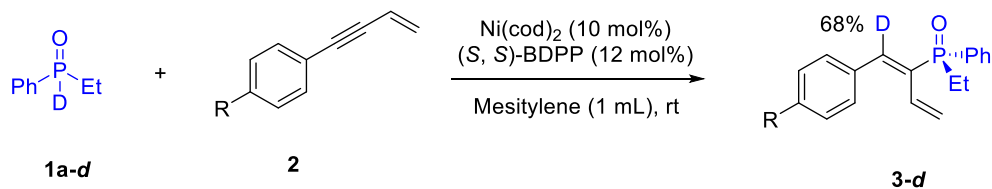

**Supplementary Table 7.** Kinetic datas of time-course for the deuterated reaction.

| <i>t</i> (min)                      | 10   | 20   | 30   | 40   | 50   |
|-------------------------------------|------|------|------|------|------|
| <i>C</i> (10 <sup>-3</sup> mmol/mL) | 0.86 | 1.35 | 1.74 | 2.15 | 2.69 |

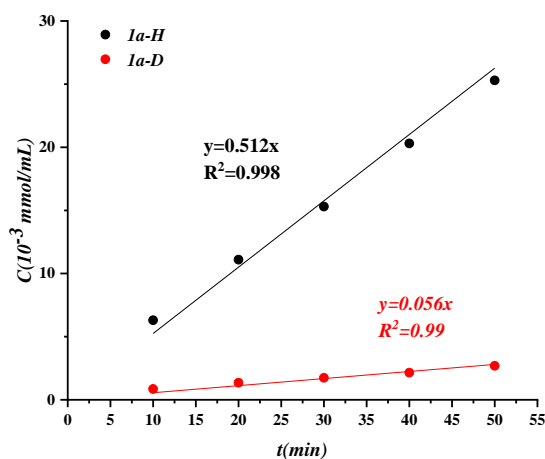

**Supplementary Figure 11.** Time-course for the deuterated reaction.



## 7. DFT Computational Studies.

All DFT calculations were performed using Gaussian 16.<sup>5</sup> Geometry optimizations were carried out with the B3LYP-D3(BJ) functional. The Lanl2dz basis set with ECP was used for Ni, and the 6-31G(d) basis set was used for other atoms. Frequency calculations and the intrinsic reaction coordinate (IRC) calculations at the same level as the geometry optimizations were performed to ensure each stationary point to be either a minimum or a transition state which were correctly connected. Conformational search has been performed for all starting materials, intermediates and products by crest-xTB 6.4.0.<sup>6-8</sup>

The single-point energies were calculated at the level of M06/SDD with ECP for Ni, and M06/6-311++g(d,p) for other atoms. Solvent effects (solvent=mesitylene) are calculated using the SMD implicit solvation model based on the optimized geometries. All of the enthalpies and Gibbs energies were calculated at standard conditions and relative energies were shown in kcal/mol (1 atm and 298.15 K). Quasi-harmonic corrected Gibbs free energy at 253.15 K (-20 °C) of **TS-1a** and **TS-1a-S** were performed with GoodVibes-3.0.1 program.<sup>9-10</sup> 3D models of optimized structures were displayed with CYLview.

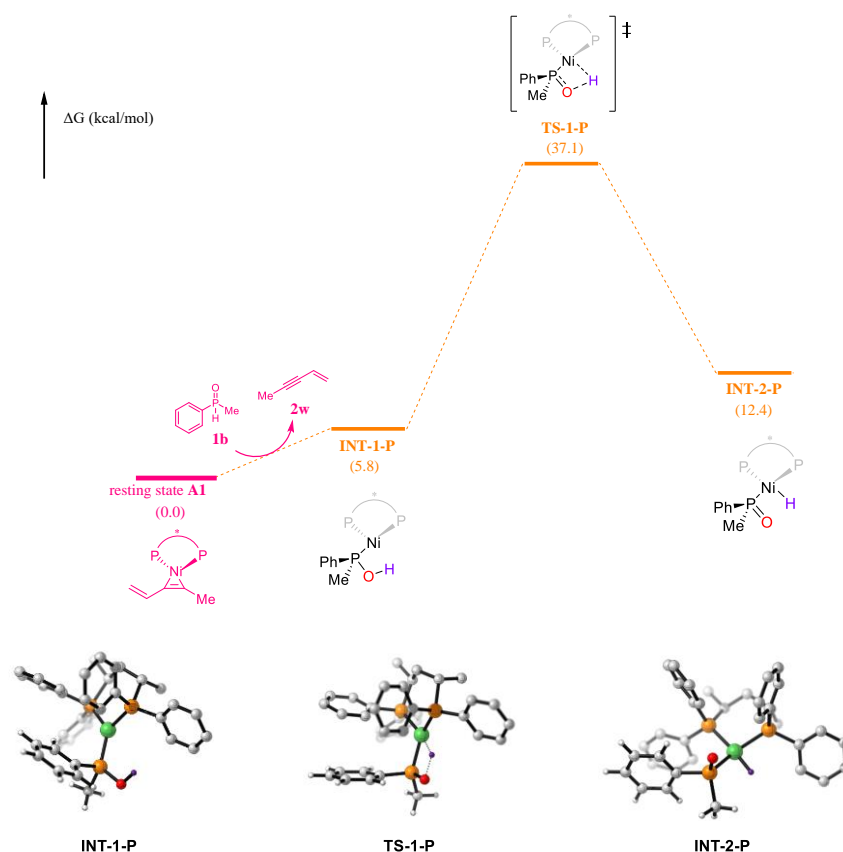

**Supplementary Figure 12.** Free energy profile for the P-H oxidative addition pathway. Computed at the SMD(mesitylene)/M06/6-311++G(d,p)/SDD//B3LYP-D3(BJ)/6-31G(d)/LANL2DZ level.

### Energy Data for all Reported Structures

**Supplementary Table 8.** Single-Point Energies (SPEs) and Gibbs free energies (G)

| Structures       | SPE(a.u.) <sup>a</sup> | G(a.u.) <sup>b</sup> |
|------------------|------------------------|----------------------|
| resting state A1 | -2170.267979           | -2,169.734147        |
| resting state A2 | -2170.268161           | -2169.734073         |
| 1b               | -688.598969            | -688.490004          |
| INT-1            | -2858.893780           | -2,858.220589        |
| TS-1a            | -2858.860894           | -2858.191233         |
| TS-1b            | -2858.846037           | -2858.180201         |
| TS-1-regio       | -2858.846647           | -2858.180093         |
| INT-2            | -2858.896556           | -2858.224544         |
| TS-2             | -2858.875785           | -2858.202871         |
| 2w               | -193.955914            | -193.896397          |
| 3bw              | -882.613494            | -882.416582          |
| TS-1a-S          | -2858.855436           | -2858.187252         |
| INT-1-P          | -2664.900122           | -2,664.318439        |
| TS-1-P           | -2664.845354           | -2,664.268558        |
| INT-2-P          | -2664.890759           | -2,664.308012        |

[a] Single point energy computed at the levels of M06/SDD and M06/6-311++g(d,p).

[b] A standard state at 1 atm and 298K was used.

| Structure                                                             | SP           | ZPE      | T*S      | G(253.15K) <sup>c</sup> |
|-----------------------------------------------------------------------|--------------|----------|----------|-------------------------|
| TS-1a                                                                 | -2858.860894 | 0.730931 | 0.089911 | -2858.184201            |
| TS-1a-S                                                               | -2858.855436 | 0.730461 | 0.097212 | -2858.179447            |
| $\Delta\Delta G(253.15k)=3.0$ kcal/mol, predicted ee at -20 °C is 99% |              |          |          |                         |

[c] Quasi-harmonic treatment at T = 253.15 K, c = 0.1 M with ZPE scale factor=0.977.

### Cartesian Coordinates (Å) of Optimized Structures.

|                                                                                     |          |          |         |   |          |          |         |
|-------------------------------------------------------------------------------------|----------|----------|---------|---|----------|----------|---------|
| 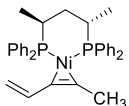 |          |          |         | H | 0.17156  | 1.20422  | 3.59891 |
|                                                                                     |          |          |         | C | 1.43099  | 0.09019  | 2.27456 |
|                                                                                     |          |          |         | H | 1.27646  | -0.93381 | 2.63152 |
| <b>Resting state A1</b>                                                             |          |          |         | C | -1.27222 | -1.17195 | 3.04620 |
| P                                                                                   | -1.61800 | -0.04809 | 0.51339 | H | -0.66952 | -1.93080 | 2.53517 |
| P                                                                                   | 1.70919  | -0.11409 | 0.42499 | H | -2.29794 | -1.54536 | 3.09083 |
| C                                                                                   | -1.20967 | 0.18392  | 2.32690 | H | -0.89710 | -1.07449 | 4.07260 |
| H                                                                                   | -1.99050 | 0.82008  | 2.76338 | C | 2.60847  | 0.68963  | 3.05034 |
| C                                                                                   | 0.14282  | 0.90030  | 2.54271 | H | 2.74437  | 1.74742  | 2.80560 |
| H                                                                                   | 0.17680  | 1.83154  | 1.96339 | H | 3.54377  | 0.16410  | 2.83467 |

|   |          |          |          |    |          |          |          |
|---|----------|----------|----------|----|----------|----------|----------|
| H | 2.42102  | 0.61848  | 4.12906  | H  | 4.17260  | 0.09211  | -1.22354 |
| C | -2.07483 | 1.63447  | -0.07827 | C  | 0.68118  | -1.86709 | -2.16101 |
| C | -2.21136 | 1.79047  | -1.46927 | C  | -0.60391 | -1.83734 | -2.24687 |
| H | -2.07001 | 0.92815  | -2.11497 | Ni | -0.00516 | -0.90624 | -0.67969 |
| C | -2.49068 | 3.03903  | -2.02044 | C  | -1.73040 | -2.25269 | -3.04709 |
| H | -2.59372 | 3.14092  | -3.09721 | H  | -1.50950 | -2.98279 | -3.83134 |
| C | -2.62244 | 4.15811  | -1.19298 | C  | -2.99437 | -1.81640 | -2.92799 |
| H | -2.82782 | 5.13452  | -1.62281 | H  | -3.27979 | -1.09912 | -2.16659 |
| C | -2.48624 | 4.01509  | 0.18729  | H  | -3.77849 | -2.17446 | -3.58913 |
| H | -2.58469 | 4.88013  | 0.83744  | C  | 1.96945  | -2.29791 | -2.75492 |
| C | -2.21946 | 2.76062  | 0.74159  | H  | 1.81874  | -2.95577 | -3.62228 |
| H | -2.11517 | 2.67482  | 1.81787  | H  | 2.55553  | -1.43097 | -3.08477 |
| C | -3.24898 | -0.88698 | 0.64200  | H  | 2.58869  | -2.82667 | -2.02162 |
| C | -3.31224 | -2.25757 | 0.35879  |    |          |          |          |
| H | -2.41872 | -2.76254 | 0.00376  |    |          |          |          |
| C | -4.51477 | -2.95052 | 0.50015  |    |          |          |          |
| H | -4.55572 | -4.01215 | 0.27319  |    |          |          |          |
| C | -5.66541 | -2.27699 | 0.91367  |    |          |          |          |
| H | -6.60406 | -2.81475 | 1.01576  |    |          |          |          |
| C | -5.61251 | -0.90735 | 1.18512  |    |          |          |          |
| H | -6.50917 | -0.37897 | 1.49773  |    |          |          |          |
| C | -4.40906 | -0.21525 | 1.05159  |    |          |          |          |
| H | -4.37288 | 0.85169  | 1.25373  |    |          |          |          |
| C | 2.19534  | 1.58101  | -0.10337 |    |          |          |          |
| C | 3.39622  | 2.20819  | 0.26915  |    |          |          |          |
| H | 4.13747  | 1.66204  | 0.84221  |    |          |          |          |
| C | 3.65340  | 3.52534  | -0.10922 |    |          |          |          |
| H | 4.58759  | 3.99705  | 0.18338  |    |          |          |          |
| C | 2.71399  | 4.23825  | -0.85961 |    |          |          |          |
| H | 2.91550  | 5.26679  | -1.14640 |    |          |          |          |
| C | 1.52440  | 3.62158  | -1.24652 |    |          |          |          |
| H | 0.78643  | 4.16063  | -1.83350 |    |          |          |          |
| C | 1.27420  | 2.29888  | -0.87912 |    |          |          |          |
| H | 0.35874  | 1.81443  | -1.19479 |    |          |          |          |
| C | 3.27131  | -1.07788 | 0.34854  |    |          |          |          |
| C | 3.41071  | -2.23297 | 1.13402  |    |          |          |          |
| H | 2.63757  | -2.50165 | 1.84825  |    |          |          |          |
| C | 4.52728  | -3.05694 | 1.00035  |    |          |          |          |
| H | 4.61837  | -3.94434 | 1.62070  |    |          |          |          |
| C | 5.52161  | -2.74692 | 0.07004  |    |          |          |          |
| H | 6.39019  | -3.39039 | -0.03672 |    |          |          |          |
| C | 5.38660  | -1.60915 | -0.72606 |    |          |          |          |
| H | 6.14973  | -1.36319 | -1.45946 |    |          |          |          |
| C | 4.27061  | -0.78311 | -0.59001 |    |          |          |          |

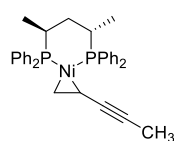

**Resting state A2**

|    |          |          |          |
|----|----------|----------|----------|
| P  | 1.93166  | -0.32861 | -0.20994 |
| P  | -1.40685 | -0.56807 | -0.53096 |
| C  | 1.74151  | -0.80653 | -2.00979 |
| H  | 2.59303  | -0.38778 | -2.56190 |
| C  | 0.45441  | -0.21975 | -2.63925 |
| H  | 0.37880  | 0.85195  | -2.41698 |
| H  | 0.57920  | -0.28790 | -3.72959 |
| C  | -0.89261 | -0.89928 | -2.30795 |
| H  | -0.74584 | -1.98384 | -2.35601 |
| Ni | 0.16992  | -0.71852 | 0.97607  |
| C  | -2.17034 | 1.41407  | 2.91860  |
| C  | -1.52625 | 0.38433  | 2.86839  |
| C  | -0.80309 | -0.84269 | 2.73140  |
| H  | -1.40055 | -1.75441 | 2.75619  |
| C  | 0.60402  | -0.92923 | 2.91906  |
| H  | 1.15349  | -0.08122 | 3.32321  |
| H  | 1.04112  | -1.90181 | 3.13823  |
| C  | 1.82172  | -2.33423 | -2.13835 |
| H  | 2.81946  | -2.69649 | -1.87660 |
| H  | 1.10597  | -2.83244 | -1.47501 |
| H  | 1.60456  | -2.64457 | -3.16799 |
| C  | -1.94959 | -0.50091 | -3.34555 |
| H  | -2.06870 | 0.58633  | -3.38178 |
| H  | -1.64932 | -0.84265 | -4.34404 |
| H  | -2.92762 | -0.93482 | -3.11860 |
| C  | -2.93317 | 2.65785  | 2.89684  |

|    |          |          |          |                                                                                                                                     |         |         |          |
|----|----------|----------|----------|-------------------------------------------------------------------------------------------------------------------------------------|---------|---------|----------|
| H  | -2.26824 | 3.52952  | 2.93560  | H                                                                                                                                   | 2.98812 | 4.13605 | -2.27933 |
| H  | -3.52062 | 2.74270  | 1.97401  | H                                                                                                                                   | 2.15851 | 4.09073 | 1.94157  |
| H  | -3.62465 | 2.73334  | 3.74649  | H                                                                                                                                   | 2.71446 | 5.35490 | -0.13069 |
| C  | -2.87647 | -1.64341 | -0.28662 | 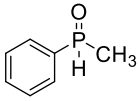 <p style="text-align: center;"><b>1b</b></p>      |         |         |          |
| C  | -3.71083 | -1.37311 | 0.81345  |                                                                                                                                     |         |         |          |
| C  | -3.13749 | -2.78161 | -1.06233 |                                                                                                                                     |         |         |          |
| C  | -4.78607 | -2.20730 | 1.10922  |                                                                                                                                     |         |         |          |
| H  | -3.50506 | -0.51229 | 1.44257  |                                                                                                                                     |         |         |          |
| C  | -4.21250 | -3.62036 | -0.75883 |                                                                                                                                     |         |         |          |
| H  | -2.50660 | -3.02684 | -1.91014 |                                                                                                                                     |         |         |          |
| C  | -5.04291 | -3.33440 | 0.32374  |                                                                                                                                     |         |         |          |
| H  | -5.42190 | -1.97970 | 1.96051  |                                                                                                                                     |         |         |          |
| H  | -4.39941 | -4.49639 | -1.37407 |                                                                                                                                     |         |         |          |
| H  | -5.87995 | -3.98601 | 0.55809  |                                                                                                                                     |         |         |          |
| C  | -2.12481 | 1.12261  | -0.63484 |                                                                                                                                     |         |         |          |
| C  | -3.45449 | 1.37893  | -0.99871 |                                                                                                                                     |         |         |          |
| C  | -1.28040 | 2.20590  | -0.35151 |                                                                                                                                     |         |         |          |
| C  | -3.92269 | 2.69049  | -1.08850 |                                                                                                                                     |         |         |          |
| H  | -4.12684 | 0.55240  | -1.20349 |                                                                                                                                     |         |         |          |
| C  | -1.74333 | 3.51703  | -0.45647 |                                                                                                                                     |         |         |          |
| H  | -0.26301 | 2.02156  | -0.03235 |                                                                                                                                     |         |         |          |
| C  | -3.06686 | 3.76309  | -0.82458 |                                                                                                                                     |         |         |          |
| H  | -4.95636 | 2.87488  | -1.36867 |                                                                                                                                     |         |         |          |
| H  | -1.06877 | 4.33973  | -0.23632 |                                                                                                                                     |         |         |          |
| H  | -3.43411 | 4.78316  | -0.89751 |                                                                                                                                     |         |         |          |
| C  | 3.58864  | -1.02829 | 0.17689  |                                                                                                                                     |         |         |          |
| C  | 4.77190  | -0.52319 | -0.38060 |                                                                                                                                     |         |         |          |
| C  | 3.65441  | -2.13147 | 1.03746  |                                                                                                                                     |         |         |          |
| C  | 5.99833  | -1.11835 | -0.08831 |                                                                                                                                     |         |         |          |
| H  | 4.73497  | 0.34559  | -1.03198 |                                                                                                                                     |         |         |          |
| C  | 4.88159  | -2.73089 | 1.32571  |                                                                                                                                     |         |         |          |
| H  | 2.73638  | -2.50508 | 1.48135  |                                                                                                                                     |         |         |          |
| C  | 6.05434  | -2.22530 | 0.76292  |                                                                                                                                     |         |         |          |
| H  | 6.91132  | -0.71768 | -0.52055 |                                                                                                                                     |         |         |          |
| H  | 4.92236  | -3.58644 | 1.99427  |                                                                                                                                     |         |         |          |
| H  | 7.01107  | -2.68687 | 0.99125  |                                                                                                                                     |         |         |          |
| C  | 2.26326  | 1.48336  | -0.26019 |                                                                                                                                     |         |         |          |
| C  | 2.58697  | 2.20492  | -1.41730 |                                                                                                                                     |         |         |          |
| C  | 2.11341  | 2.18399  | 0.94898  |                                                                                                                                     |         |         |          |
| C  | 2.74706  | 3.59148  | -1.37049 |                                                                                                                                     |         |         |          |
| H  | 2.70573  | 1.69507  | -2.36749 |                                                                                                                                     |         |         |          |
| C  | 2.28241  | 3.56640  | 0.99822  |                                                                                                                                     |         |         |          |
| H  | 1.83478  | 1.63670  | 1.84431  |                                                                                                                                     |         |         |          |
| C  | 2.59396  | 4.27578  | -0.16457 |                                                                                                                                     |         |         |          |
|    |          |          |          |  <p style="text-align: center;"><b>INT-1</b></p> |         |         |          |
| P  | 1.44569  | 0.63797  | -0.55484 |                                                                                                                                     |         |         |          |
| P  | -1.92010 | 0.43813  | -0.24831 |                                                                                                                                     |         |         |          |
| C  | 0.90010  | 0.42275  | -2.34322 |                                                                                                                                     |         |         |          |
| H  | 1.59123  | 1.01782  | -2.95564 |                                                                                                                                     |         |         |          |
| C  | -0.51877 | 0.96053  | -2.63744 |                                                                                                                                     |         |         |          |
| H  | -0.60909 | 2.00607  | -2.32249 |                                                                                                                                     |         |         |          |
| H  | -0.61529 | 0.97561  | -3.73291 |                                                                                                                                     |         |         |          |
| C  | -1.75018 | 0.19189  | -2.10369 |                                                                                                                                     |         |         |          |
| H  | -1.58057 | -0.88374 | -2.23137 |                                                                                                                                     |         |         |          |
| Ni | -0.13745 | -0.03124 | 0.93841  |                                                                                                                                     |         |         |          |
| P  | -0.07663 | -2.19433 | 1.23858  |                                                                                                                                     |         |         |          |
| O  | 1.21492  | -2.71697 | 2.16204  |                                                                                                                                     |         |         |          |
| H  | 1.67132  | -1.92572 | 2.51698  |                                                                                                                                     |         |         |          |
| C  | 2.90443  | -0.05368 | 3.25188  |                                                                                                                                     |         |         |          |

|   |          |          |          |   |          |          |          |
|---|----------|----------|----------|---|----------|----------|----------|
| C | 1.71630  | 0.16995  | 3.10634  | H | 3.93009  | 1.44219  | -2.01056 |
| C | 0.31097  | 0.36295  | 2.93679  | C | 4.72976  | -1.81006 | -0.06240 |
| H | -0.32606 | -0.24440 | 3.57823  | H | 2.71240  | -1.67256 | 0.67527  |
| C | -0.24740 | 1.49029  | 2.30955  | C | 5.70602  | -1.22476 | -0.86901 |
| H | 0.38485  | 2.31498  | 2.00041  | H | 6.17046  | 0.41172  | -2.19672 |
| H | -1.27898 | 1.75129  | 2.52505  | H | 4.95085  | -2.71730 | 0.49404  |
| C | 1.04853  | -1.04240 | -2.77232 | H | 6.69267  | -1.67332 | -0.94639 |
| H | 2.09480  | -1.35621 | -2.75809 | C | 1.90169  | 2.42600  | -0.46508 |
| H | 0.49547  | -1.71704 | -2.11740 | C | 1.64273  | 3.38117  | -1.45802 |
| H | 0.66684  | -1.17454 | -3.79267 | C | 2.50204  | 2.85734  | 0.73265  |
| C | -2.98064 | 0.62230  | -2.91594 | C | 1.95265  | 4.72887  | -1.25429 |
| H | -3.08194 | 1.71204  | -2.90819 | H | 1.19538  | 3.08839  | -2.40063 |
| H | -2.87401 | 0.30093  | -3.95965 | C | 2.81918  | 4.19866  | 0.93204  |
| H | -3.91283 | 0.20596  | -2.52644 | H | 2.71517  | 2.13051  | 1.51144  |
| C | 4.34138  | -0.27037 | 3.39552  | C | 2.53754  | 5.14364  | -0.05875 |
| H | 4.54912  | -1.14005 | 4.03079  | H | 1.73830  | 5.45182  | -2.03698 |
| H | 4.81368  | -0.44745 | 2.42146  | H | 3.28206  | 4.50848  | 1.86511  |
| H | 4.83161  | 0.59666  | 3.85602  | H | 2.77609  | 6.19156  | 0.09981  |
| C | -3.39893 | -0.54844 | 0.22481  | C | 0.05624  | -3.37117 | -0.16149 |
| C | -3.90445 | -0.35199 | 1.52255  | C | -1.05365 | -3.58141 | -0.99439 |
| C | -3.95424 | -1.57239 | -0.55476 | C | 1.27500  | -3.97513 | -0.49549 |
| C | -4.93235 | -1.14734 | 2.01978  | C | -0.94167 | -4.35679 | -2.14711 |
| H | -3.47696 | 0.42789  | 2.14678  | H | -2.00915 | -3.13546 | -0.74181 |
| C | -4.97433 | -2.38456 | -0.04982 | C | 1.38744  | -4.74811 | -1.65214 |
| H | -3.59157 | -1.75101 | -1.56077 | H | 2.13059  | -3.83912 | 0.15482  |
| C | -5.46765 | -2.17531 | 1.23680  | C | 0.28414  | -4.93502 | -2.48592 |
| H | -5.30963 | -0.97491 | 3.02402  | H | -1.81076 | -4.50944 | -2.78194 |
| H | -5.38369 | -3.17818 | -0.66897 | H | 2.34141  | -5.20457 | -1.90218 |
| H | -6.26056 | -2.80565 | 1.62861  | H | 0.37589  | -5.53180 | -3.38905 |
| C | -2.57538 | 2.16137  | -0.18322 | C | -1.47961 | -2.94325 | 2.17563  |
| C | -3.93910 | 2.47670  | -0.27910 | H | -1.63236 | -2.36767 | 3.09333  |
| C | -1.64742 | 3.20890  | -0.08919 | H | -2.39873 | -2.88732 | 1.58665  |
| C | -4.35978 | 3.80700  | -0.28438 | H | -1.26430 | -3.98625 | 2.42729  |
| H | -4.67372 | 1.68097  | -0.34720 |   |          |          |          |
| C | -2.06537 | 4.53916  | -0.11423 |   |          |          |          |
| H | -0.59471 | 2.97939  | 0.01238  |   |          |          |          |
| C | -3.42451 | 4.84184  | -0.20807 |   |          |          |          |
| H | -5.41998 | 4.03568  | -0.35369 |   |          |          |          |
| H | -1.32508 | 5.33190  | -0.05052 |   |          |          |          |
| H | -3.75551 | 5.87675  | -0.21615 |   |          |          |          |
| C | 3.15562  | -0.06290 | -0.67051 | P | 1.52290  | 0.66545  | -0.51213 |
| C | 4.14676  | 0.52365  | -1.47249 | P | -1.90624 | 0.40058  | -0.23817 |
| C | 3.46357  | -1.22839 | 0.03707  | C | 0.97747  | 0.50970  | -2.31022 |
| C | 5.41171  | -0.05332 | -1.57287 | H | 1.63627  | 1.18070  | -2.87802 |
|   |          |          |          | C | -0.46451 | 0.98353  | -2.59294 |

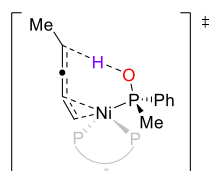

**TS-1a**

|    |          |          |          |   |          |          |          |
|----|----------|----------|----------|---|----------|----------|----------|
| H  | -0.60575 | 2.01833  | -2.26435 | H | -0.68626 | 3.02765  | -0.14397 |
| H  | -0.55690 | 1.01367  | -3.68820 | C | -3.61151 | 4.73111  | -0.38859 |
| C  | -1.66657 | 0.15002  | -2.08507 | H | -5.56684 | 3.82223  | -0.42685 |
| H  | -1.44476 | -0.91613 | -2.20455 | H | -1.53559 | 5.32900  | -0.31936 |
| Ni | -0.10427 | 0.02420  | 0.99747  | H | -3.99308 | 5.74677  | -0.44534 |
| P  | 0.08558  | -2.22770 | 1.15690  | C | 3.23607  | -0.01987 | -0.63152 |
| O  | 1.39758  | -2.72133 | 1.92941  | C | 4.20253  | 0.57682  | -1.45772 |
| H  | 1.86923  | -1.78326 | 2.57069  | C | 3.58202  | -1.15527 | 0.10729  |
| C  | 2.19897  | -0.72588 | 3.37757  | C | 5.48314  | 0.03688  | -1.55290 |
| C  | 1.19237  | 0.02911  | 3.24460  | H | 3.95530  | 1.47424  | -2.01789 |
| C  | -0.03668 | 0.61962  | 3.02718  | C | 4.86853  | -1.69383 | 0.01519  |
| H  | -0.87961 | 0.24075  | 3.60566  | H | 2.85032  | -1.62070 | 0.75399  |
| C  | -0.24833 | 1.69428  | 2.11575  | C | 5.81936  | -1.10271 | -0.81533 |
| H  | 0.57487  | 2.35754  | 1.87476  | H | 6.22191  | 0.50715  | -2.19650 |
| H  | -1.21880 | 2.17911  | 2.15145  | H | 5.12131  | -2.57612 | 0.59723  |
| C  | 1.20599  | -0.91073 | -2.83996 | H | 6.81999  | -1.52057 | -0.88641 |
| H  | 2.26184  | -1.18668 | -2.80232 | C | 1.98247  | 2.44666  | -0.36814 |
| H  | 0.65143  | -1.65460 | -2.26938 | C | 1.63789  | 3.45131  | -1.28168 |
| H  | 0.87393  | -0.97182 | -3.88404 | C | 2.68681  | 2.81488  | 0.79347  |
| C  | -2.89298 | 0.52852  | -2.93176 | C | 1.97573  | 4.78641  | -1.03853 |
| H  | -3.02047 | 1.61522  | -2.95309 | H | 1.10752  | 3.20747  | -2.19484 |
| H  | -2.75318 | 0.18452  | -3.96400 | C | 3.03040  | 4.14265  | 1.03199  |
| H  | -3.82495 | 0.10184  | -2.55507 | H | 2.96325  | 2.04681  | 1.51187  |
| C  | 3.42647  | -0.84016 | 4.21704  | C | 2.66998  | 5.13723  | 0.11773  |
| H  | 3.43167  | -1.79955 | 4.74811  | H | 1.69869  | 5.54885  | -1.76180 |
| H  | 4.31934  | -0.82845 | 3.57971  | H | 3.57674  | 4.40351  | 1.93418  |
| H  | 3.51754  | -0.03510 | 4.95548  | H | 2.93188  | 6.17448  | 0.30602  |
| C  | -3.35717 | -0.62235 | 0.23725  | C | 0.13131  | -3.25109 | -0.36612 |
| C  | -3.81386 | -0.46325 | 1.55812  | C | -1.01652 | -3.43916 | -1.14872 |
| C  | -3.94835 | -1.61433 | -0.55598 | C | 1.34189  | -3.80997 | -0.79605 |
| C  | -4.83403 | -1.26241 | 2.06433  | C | -0.95093 | -4.14018 | -2.35250 |
| H  | -3.35124 | 0.28785  | 2.19295  | H | -1.96666 | -3.04246 | -0.81219 |
| C  | -4.95907 | -2.43215 | -0.04162 | C | 1.40846  | -4.50957 | -2.00174 |
| H  | -3.61957 | -1.76725 | -1.57725 | H | 2.22430  | -3.69073 | -0.17894 |
| C  | -5.40661 | -2.25839 | 1.26669  | C | 0.26654  | -4.66851 | -2.78880 |
| H  | -5.17347 | -1.12081 | 3.08658  | H | -1.84990 | -4.27730 | -2.94839 |
| H  | -5.39592 | -3.20330 | -0.67005 | H | 2.35595  | -4.93033 | -2.32773 |
| H  | -6.19186 | -2.89396 | 1.66527  | H | 0.32161  | -5.20835 | -3.73006 |
| C  | -2.62988 | 2.09902  | -0.23484 | C | -1.31822 | -3.00336 | 2.07398  |
| C  | -4.00901 | 2.34365  | -0.30664 | H | -1.41805 | -2.49268 | 3.03645  |
| C  | -1.75272 | 3.19469  | -0.23159 | H | -2.25831 | -2.88814 | 1.52888  |
| C  | -4.49507 | 3.65001  | -0.37656 | H | -1.11566 | -4.06528 | 2.24392  |
| H  | -4.70580 | 1.51216  | -0.30845 |   |          |          |          |
| C  | -2.23689 | 4.49905  | -0.31890 |   |          |          |          |

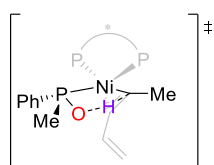

**TS-1b**

|    |          |          |          |   |          |          |          |
|----|----------|----------|----------|---|----------|----------|----------|
| P  | 0.83773  | 1.46428  | -0.71571 | C | 3.46001  | 0.51741  | -0.57853 |
| P  | -1.97038 | -0.34948 | -0.62624 | C | 4.65491  | 2.82768  | -1.58697 |
| C  | 0.26570  | 1.44929  | -2.49582 | H | 2.66910  | 3.64770  | -1.65957 |
| H  | 0.69752  | 2.32862  | -2.99022 | C | 4.84471  | 0.56679  | -0.75018 |
| C  | -1.27197 | 1.56886  | -2.60659 | H | 2.99230  | -0.37155 | -0.17542 |
| H  | -1.63633 | 2.36084  | -1.94099 | C | 5.44290  | 1.72136  | -1.25505 |
| H  | -1.49573 | 1.91296  | -3.62664 | H | 5.11942  | 3.73114  | -1.97315 |
| C  | -2.12545 | 0.30443  | -2.37966 | H | 5.44270  | -0.29888 | -0.48394 |
| H  | -1.71625 | -0.49999 | -3.00232 | H | 6.52090  | 1.76500  | -1.38541 |
| C  | 0.80129  | -0.11643 | 2.06922  | C | 0.39530  | 3.16595  | -0.14235 |
| C  | -0.28471 | -0.73507 | 2.49679  | C | 0.07651  | 4.23336  | -0.99436 |
| Ni | 0.01615  | -0.28613 | 0.36200  | C | 0.36515  | 3.38949  | 1.24406  |
| P  | 0.69912  | -2.47716 | 0.17011  | C | -0.26802 | 5.48395  | -0.47728 |
| O  | 0.07003  | -3.10949 | 1.49403  | H | 0.08834  | 4.09943  | -2.07087 |
| H  | -0.28707 | -2.05670 | 2.03866  | C | 0.03247  | 4.64007  | 1.76179  |
| C  | -2.81888 | -1.97638 | -0.68462 | H | 0.58255  | 2.56908  | 1.91988  |
| C  | -3.20560 | -2.63175 | -1.86133 | C | -0.29059 | 5.69191  | 0.90165  |
| C  | -2.98720 | -2.63741 | 0.54315  | H | -0.51920 | 6.29514  | -1.15527 |
| C  | -3.75468 | -3.91525 | -1.81165 | H | 0.01802  | 4.78975  | 2.83795  |
| H  | -3.06764 | -2.16009 | -2.82759 | H | -0.56059 | 6.66452  | 1.30315  |
| C  | -3.53911 | -3.91404 | 0.59215  | C | 0.82729  | 0.20507  | -3.19549 |
| H  | -2.65438 | -2.15656 | 1.45635  | H | 0.44787  | 0.13519  | -4.22256 |
| C  | -3.92418 | -4.55868 | -0.58611 | H | 1.91961  | 0.24281  | -3.23629 |
| H  | -4.04465 | -4.41098 | -2.73400 | H | 0.54956  | -0.70731 | -2.65820 |
| H  | -3.64886 | -4.41434 | 1.54967  | C | -3.56763 | 0.59270  | -2.81985 |
| H  | -4.34447 | -5.55962 | -0.54878 | H | -3.97483 | 1.44732  | -2.27112 |
| C  | -3.17086 | 0.66995  | 0.32583  | H | -3.59216 | 0.83463  | -3.88966 |
| C  | -4.55324 | 0.42950  | 0.32218  | H | -4.23496 | -0.25561 | -2.65001 |
| C  | -2.66938 | 1.73495  | 1.08413  | C | 0.19660  | -3.58473 | -1.21937 |
| C  | -5.41258 | 1.25377  | 1.04790  | H | -0.88675 | -3.70094 | -1.19188 |
| H  | -4.95456 | -0.40922 | -0.23723 | H | 0.47284  | -3.14704 | -2.18469 |
| C  | -3.52933 | 2.56793  | 1.79920  | H | 0.66790  | -4.56748 | -1.12208 |
| H  | -1.59972 | 1.88843  | 1.12776  | C | 2.49902  | -2.80838 | 0.26911  |
| C  | -4.90400 | 2.32935  | 1.78141  | C | 3.29533  | -2.99341 | -0.87051 |
| H  | -6.48103 | 1.05586  | 1.04232  | C | 3.11988  | -2.75585 | 1.52632  |
| H  | -3.11861 | 3.39414  | 2.37285  | C | 4.67992  | -3.12889 | -0.75654 |
| H  | -5.57745 | 2.96990  | 2.34424  | H | 2.83831  | -3.02587 | -1.85560 |
| C  | 2.66268  | 1.61817  | -0.91450 | C | 4.50243  | -2.88765 | 1.63977  |
| C  | 3.27237  | 2.77785  | -1.41691 | H | 2.50618  | -2.61354 | 2.40900  |
|    |          |          |          | C | 5.28838  | -3.07522 | 0.49906  |
|    |          |          |          | H | 5.28295  | -3.27534 | -1.64893 |
|    |          |          |          | H | 4.96896  | -2.84718 | 2.62050  |
|    |          |          |          | H | 6.36618  | -3.18104 | 0.58882  |
|    |          |          |          | C | -1.19436 | -0.41673 | 3.65315  |

|                                                                                   |          |          |          |   |          |          |          |
|-----------------------------------------------------------------------------------|----------|----------|----------|---|----------|----------|----------|
| H                                                                                 | -0.80586 | 0.40205  | 4.27431  | C | -3.49463 | 3.39915  | -0.00814 |
| H                                                                                 | -2.18591 | -0.12031 | 3.28801  | H | -1.68604 | 2.34039  | 0.49721  |
| H                                                                                 | -1.34061 | -1.29554 | 4.29441  | C | -4.76328 | 3.30336  | -0.57978 |
| C                                                                                 | 1.98595  | 0.52303  | 2.58054  | H | -6.19569 | 2.00098  | -1.53347 |
| H                                                                                 | 2.51793  | 1.21005  | 1.92629  | H | -3.14215 | 4.34018  | 0.40335  |
| C                                                                                 | 2.49203  | 0.26499  | 3.80200  | H | -5.41416 | 4.17277  | -0.61390 |
| H                                                                                 | 2.02007  | -0.45343 | 4.46646  | C | 2.99342  | 1.16542  | -0.48405 |
| H                                                                                 | 3.39468  | 0.75532  | 4.15647  | C | 3.77297  | 1.84235  | -1.43405 |
| 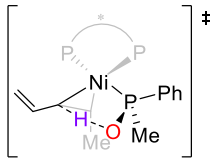 |          |          |          | C | 3.60875  | 0.63727  | 0.65558  |
| <b>TS-1-regio</b>                                                                 |          |          |          | C | 5.14900  | 1.96857  | -1.25642 |
| P                                                                                 | 1.16778  | 1.02594  | -0.65325 | H | 3.30480  | 2.28324  | -2.30985 |
| P                                                                                 | -1.86557 | -0.32208 | -0.45933 | C | 4.98731  | 0.77342  | 0.83735  |
| C                                                                                 | 0.92076  | 0.61444  | -2.45231 | H | 3.01424  | 0.10318  | 1.38775  |
| H                                                                                 | 1.36281  | 1.42458  | -3.04614 | C | 5.75938  | 1.43300  | -0.11817 |
| C                                                                                 | -0.57671 | 0.55831  | -2.83119 | H | 5.74497  | 2.49039  | -2.00026 |
| H                                                                                 | -1.07123 | 1.50546  | -2.58673 | H | 5.45353  | 0.35511  | 1.72530  |
| H                                                                                 | -0.61344 | 0.47650  | -3.92661 | H | 6.83206  | 1.53542  | 0.02156  |
| C                                                                                 | -1.41909 | -0.60454 | -2.26658 | C | 0.69969  | 2.80751  | -0.53382 |
| H                                                                                 | -0.79238 | -1.50241 | -2.23958 | C | 0.32638  | 3.61184  | -1.61741 |
| C                                                                                 | 0.40150  | 0.45575  | 2.90038  | C | 0.68869  | 3.36500  | 0.75553  |
| C                                                                                 | -0.80160 | 0.05545  | 2.51852  | C | -0.08029 | 4.93315  | -1.41538 |
| Ni                                                                                | -0.07108 | -0.10395 | 0.81490  | H | 0.33872  | 3.22068  | -2.62846 |
| P                                                                                 | 0.99357  | -2.09536 | 1.33440  | C | 0.29544  | 4.68623  | 0.95449  |
| O                                                                                 | 1.98273  | -1.59544 | 2.49020  | H | 0.97349  | 2.75597  | 1.60603  |
| H                                                                                 | 1.39381  | -0.51725 | 2.73606  | C | -0.10247 | 5.47329  | -0.13022 |
| C                                                                                 | -2.88183 | -1.80543 | -0.08253 | H | -0.38031 | 5.53794  | -2.26683 |
| C                                                                                 | -2.46247 | -3.06957 | -0.52835 | H | 0.29414  | 5.09754  | 1.96024  |
| C                                                                                 | -4.01488 | -1.73393 | 0.74127  | H | -0.42046 | 6.50054  | 0.02527  |
| C                                                                                 | -3.15580 | -4.22398 | -0.16805 | C | 1.66546  | -0.68014 | -2.80482 |
| H                                                                                 | -1.58597 | -3.15684 | -1.16166 | H | 1.45801  | -0.96200 | -3.84464 |
| C                                                                                 | -4.70491 | -2.88977 | 1.10871  | H | 2.74549  | -0.55776 | -2.69357 |
| H                                                                                 | -4.36454 | -0.76971 | 1.09313  | H | 1.37232  | -1.51238 | -2.16212 |
| C                                                                                 | -4.27918 | -4.13925 | 0.65660  | C | -2.61653 | -0.87167 | -3.18624 |
| H                                                                                 | -2.81570 | -5.19042 | -0.53009 | H | -3.21395 | 0.03526  | -3.32223 |
| H                                                                                 | -5.58025 | -2.81062 | 1.74756  | H | -2.26229 | -1.18835 | -4.17495 |
| H                                                                                 | -4.81779 | -5.03815 | 0.94189  | H | -3.26886 | -1.65680 | -2.79383 |
| C                                                                                 | -3.08384 | 1.05459  | -0.50521 | C | 0.04497  | -3.49949 | 2.07085  |
| C                                                                                 | -4.36925 | 0.96496  | -1.06573 | H | -0.52428 | -3.09293 | 2.91225  |
| C                                                                                 | -2.66536 | 2.27768  | 0.03765  | H | -0.66705 | -3.91974 | 1.35578  |
| C                                                                                 | -5.20244 | 2.08219  | -1.10025 | H | 0.71575  | -4.28500 | 2.43312  |
| H                                                                                 | -4.72482 | 0.01845  | -1.45846 | C | 2.02276  | -2.94243 | 0.08383  |
|                                                                                   |          |          |          | C | 1.43244  | -3.80771 | -0.85222 |
|                                                                                   |          |          |          | C | 3.38747  | -2.64874 | -0.03957 |
|                                                                                   |          |          |          | C | 2.18170  | -4.34623 | -1.89759 |



|   |          |          |          |   |          |          |          |
|---|----------|----------|----------|---|----------|----------|----------|
| H | 0.38032  | -4.06378 | -0.76422 | H | 3.12794  | -3.49349 | 1.09283  |
| C | 4.13462  | -3.18046 | -1.09042 | C | 4.63530  | -0.01886 | 1.92913  |
| H | 3.85590  | -2.00375 | 0.69291  | H | 2.73526  | 0.77972  | 1.31494  |
| C | 3.53496  | -4.02464 | -2.02730 | C | 5.40712  | -1.17134 | 2.08908  |
| H | 1.70942  | -5.01511 | -2.61259 | H | 5.46135  | -3.31935 | 1.90297  |
| H | 5.19019  | -2.93581 | -1.17492 | H | 5.05764  | 0.96052  | 2.13385  |
| H | 4.11793  | -4.43575 | -2.84670 | H | 6.43371  | -1.09569 | 2.43666  |
| C | -2.17404 | -0.01125 | 3.08079  | C | 0.87298  | -3.01889 | -0.27637 |
| H | -2.53790 | -1.04611 | 3.07942  | C | 0.38390  | -4.21937 | 0.25922  |
| H | -2.20431 | 0.35911  | 4.11464  | C | 1.24188  | -2.98007 | -1.63270 |
| H | -2.87890 | 0.57086  | 2.47558  | C | 0.23126  | -5.34827 | -0.54836 |
| C | 0.75869  | 1.52587  | 3.82518  | H | 0.11897  | -4.29430 | 1.30720  |
| H | -0.06210 | 2.01169  | 4.36183  | C | 1.09123  | -4.11221 | -2.43199 |
| C | 2.01185  | 1.95585  | 4.04664  | H | 1.67897  | -2.06434 | -2.02712 |
| H | 2.85819  | 1.51740  | 3.52461  | C | 0.57442  | -5.29542 | -1.89857 |
| H | 2.22240  | 2.76102  | 4.74481  | H | -0.15483 | -6.26779 | -0.11707 |

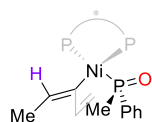

**INT-2**

|    |          |          |          |   |          |          |          |
|----|----------|----------|----------|---|----------|----------|----------|
| P  | 1.00500  | -1.45874 | 0.69191  | C | -4.11490 | 1.76437  | -0.14115 |
| P  | -2.06783 | -0.02015 | 0.64517  | C | -4.09250 | 3.17039  | 2.26536  |
| C  | 0.23831  | -1.88395 | 2.34989  | H | -2.57945 | 1.78947  | 2.89350  |
| H  | 0.73517  | -2.80405 | 2.68176  | C | -4.95061 | 2.86713  | 0.03145  |
| C  | -1.27835 | -2.17547 | 2.28906  | H | -4.11693 | 1.23320  | -1.08595 |
| H  | -1.51610 | -2.83139 | 1.44461  | C | -4.94319 | 3.57339  | 1.23528  |
| H  | -1.52703 | -2.74853 | 3.19372  | H | -4.07300 | 3.71759  | 3.20362  |
| C  | -2.22940 | -0.96829 | 2.25593  | H | -5.60343 | 3.17739  | -0.77953 |
| H  | -1.90387 | -0.24844 | 3.01417  | H | -5.59285 | 4.43370  | 1.36839  |
| C  | -1.38892 | 2.48648  | -1.76747 | C | -2.84627 | -1.11566 | -0.60468 |
| C  | -0.68590 | 2.22303  | -0.64543 | C | -2.00872 | -1.70084 | -1.56569 |
| Ni | 0.06115  | 0.46201  | -0.18594 | C | -4.21493 | -1.43430 | -0.61790 |
| C  | -0.60164 | 3.17038  | 0.47040  | C | -2.51132 | -2.61382 | -2.49269 |
| H  | -1.29124 | 4.01618  | 0.47272  | H | -0.95644 | -1.44173 | -1.58540 |
| C  | 0.23621  | 3.04649  | 1.51400  | C | -4.72039 | -2.33499 | -1.55400 |
| H  | 0.96184  | 2.23823  | 1.55530  | H | -4.88741 | -0.96656 | 0.09229  |
| P  | 1.78101  | 0.84283  | -1.58998 | C | -3.86839 | -2.93459 | -2.48594 |
| O  | 2.70307  | -0.37603 | -1.73195 | H | -1.83587 | -3.07304 | -3.20784 |
| H  | -1.44898 | 1.70758  | -2.52745 | H | -5.78079 | -2.57156 | -1.55452 |
| C  | 1.18534  | 1.30704  | -3.27981 | H | -4.26551 | -3.64349 | -3.20708 |
| C  | 2.76763  | -1.36841 | 1.17742  | C | 0.57605  | -0.78759 | 3.37171  |
| C  | 3.54455  | -2.52122 | 1.33793  | H | 0.05577  | -0.97908 | 4.31834  |
| C  | 3.32258  | -0.11844 | 1.47314  | H | 1.64852  | -0.75565 | 3.57380  |
| C  | 4.86059  | -2.42098 | 1.79038  | H | 0.27786  | 0.20478  | 3.01514  |

|   |          |          |          |   |          |          |          |
|---|----------|----------|----------|---|----------|----------|----------|
| C | -3.65509 | -1.41090 | 2.60436  | H | 3.12360  | 0.34751  | -1.14068 |
| H | -3.99839 | -2.20034 | 1.92909  | C | 2.22724  | 1.67925  | -2.47301 |
| H | -3.67826 | -1.81209 | 3.62504  | H | 1.36998  | 1.97971  | -3.06624 |
| H | -4.36300 | -0.57890 | 2.55221  | H | 3.05137  | 2.38389  | -2.41202 |
| C | 2.82130  | 2.29900  | -1.15946 | C | -1.51156 | -1.09577 | 3.29674  |
| C | 2.34134  | 3.61535  | -1.13979 | H | -2.00914 | -2.06331 | 3.39635  |
| C | 4.16494  | 2.05523  | -0.84543 | H | -0.48484 | -1.28489 | 2.96808  |
| C | 3.18884  | 4.66812  | -0.79657 | H | -1.48470 | -0.62788 | 4.28901  |
| H | 1.30444  | 3.81372  | -1.38464 | C | -0.10840 | 2.91177  | 3.29921  |
| C | 5.01048  | 3.10903  | -0.49482 | H | -0.70773 | 3.74258  | 2.91348  |
| H | 4.52688  | 1.03343  | -0.88869 | H | -0.39000 | 2.75953  | 4.34867  |
| C | 4.52302  | 4.41702  | -0.46525 | H | 0.94636  | 3.20297  | 3.27157  |
| H | 2.80743  | 5.68598  | -0.78400 | C | 0.38649  | -0.36111 | -4.12556 |
| H | 6.05148  | 2.90968  | -0.25229 | H | 0.14538  | -1.15593 | -4.84150 |
| H | 5.18018  | 5.23893  | -0.19296 | H | -0.37045 | 0.42708  | -4.25385 |
| H | 0.24872  | 3.76501  | 2.32892  | H | 1.35339  | 0.07744  | -4.39071 |
| H | 0.75360  | 2.30806  | -3.30871 | C | 2.14593  | 1.91873  | 1.12973  |
| H | 0.43755  | 0.58262  | -3.61878 | C | 2.88173  | 3.00813  | 0.64599  |
| H | 2.05465  | 1.25585  | -3.94317 | C | 2.81921  | 0.89845  | 1.82545  |
| C | -2.10856 | 3.75591  | -2.14177 | C | 4.25752  | 3.08806  | 0.87021  |
| H | -1.67285 | 4.19627  | -3.05050 | H | 2.38915  | 3.78274  | 0.07015  |
| H | -3.16517 | 3.55543  | -2.36537 | C | 4.19139  | 0.98544  | 2.05145  |
| H | -2.07483 | 4.51525  | -1.35697 | H | 2.27742  | 0.00799  | 2.13366  |

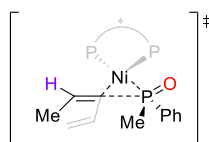

**TS-2**

|    |          |          |          |   |          |          |          |
|----|----------|----------|----------|---|----------|----------|----------|
| P  | -2.03689 | -0.81057 | 0.55883  | C | -0.06890 | 4.44154  | 0.38529  |
| P  | 0.37385  | 1.60969  | 0.77182  | C | -1.13420 | 2.89845  | -1.13473 |
| C  | -2.26878 | -0.18832 | 2.31298  | C | -0.68331 | 5.50680  | -0.27351 |
| H  | -3.33904 | -0.26291 | 2.54669  | H | 0.58763  | 4.64315  | 1.22373  |
| C  | -1.86783 | 1.29685  | 2.47229  | C | -1.75989 | 3.96113  | -1.78569 |
| H  | -2.36160 | 1.91395  | 1.71123  | H | -1.30288 | 1.88039  | -1.46725 |
| H  | -2.28534 | 1.62239  | 3.43571  | C | -1.53432 | 5.26919  | -1.35578 |
| C  | -0.36055 | 1.62933  | 2.49959  | H | -0.50072 | 6.52421  | 0.06171  |
| H  | 0.17499  | 0.81203  | 2.99406  | H | -2.42445 | 3.76140  | -2.62141 |
| Ni | -0.07898 | -0.29319 | -0.25893 | H | -2.01661 | 6.10175  | -1.86070 |
| P  | 1.36759  | -2.02920 | -0.21995 | C | -2.72831 | -2.51262 | 0.67656  |
| O  | 1.22909  | -2.06746 | 1.31226  | C | -4.04249 | -2.83209 | 0.30864  |
| H  | -0.30434 | -1.69643 | -2.51628 | C | -1.88239 | -3.53277 | 1.14664  |
| C  | 0.39558  | -0.88960 | -2.71767 | C | -4.50454 | -4.14579 | 0.40837  |
| C  | 1.18299  | -0.45942 | -1.68876 | H | -4.70524 | -2.05525 | -0.05936 |
| C  | 2.25958  | 0.53585  | -1.77223 | C | -2.35248 | -4.84094 | 1.25553  |

|   |          |          |          |
|---|----------|----------|----------|
| H | -0.85801 | -3.29389 | 1.41972  |
| C | -3.66269 | -5.15219 | 0.88384  |
| H | -5.52450 | -4.38131 | 0.11604  |
| H | -1.69015 | -5.62012 | 1.62324  |
| H | -4.02399 | -6.17403 | 0.96090  |
| C | -3.31186 | 0.09177  | -0.41842 |
| C | -4.36500 | 0.83014  | 0.13720  |
| C | -3.17112 | 0.07689  | -1.81660 |
| C | -5.23955 | 1.55107  | -0.67917 |
| H | -4.50967 | 0.85423  | 1.21180  |
| C | -4.05143 | 0.78311  | -2.63381 |
| H | -2.34611 | -0.47641 | -2.25515 |
| C | -5.08488 | 1.53208  | -2.06513 |
| H | -6.04263 | 2.12789  | -0.22874 |
| H | -3.92464 | 0.75800  | -3.71281 |
| H | -5.76487 | 2.09519  | -2.69815 |
| C | 3.17054  | -2.21434 | -0.56266 |
| C | 3.69400  | -2.34879 | -1.85608 |
| C | 4.04068  | -2.23799 | 0.53233  |
| C | 5.06528  | -2.50241 | -2.04961 |
| H | 3.02968  | -2.30998 | -2.71476 |
| C | 5.41545  | -2.38532 | 0.33856  |
| H | 3.61877  | -2.14758 | 1.52713  |
| C | 5.93004  | -2.51635 | -0.95137 |
| H | 5.46171  | -2.60435 | -3.05626 |
| H | 6.08415  | -2.39834 | 1.19533  |
| H | 7.00010  | -2.62891 | -1.10347 |
| C | 0.71679  | -3.55684 | -1.02834 |
| H | -0.37406 | -3.57504 | -1.00762 |
| H | 1.07147  | -3.64190 | -2.05746 |
| H | 1.09823  | -4.40509 | -0.45115 |

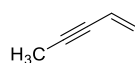

**2w**

|   |          |          |          |
|---|----------|----------|----------|
| C | 1.13169  | -0.06476 | 0.00000  |
| C | -0.06909 | -0.23352 | -0.00000 |
| C | 2.57225  | 0.16135  | -0.00000 |
| H | 2.88535  | 0.72959  | -0.88470 |
| H | 2.88542  | 0.72913  | 0.88497  |
| H | 3.12457  | -0.78602 | -0.00027 |
| C | -1.47018 | -0.48174 | -0.00000 |
| H | -1.77329 | -1.52901 | -0.00002 |
| C | -2.41398 | 0.47153  | 0.00001  |
| H | -2.15806 | 1.52667  | 0.00002  |

|   |          |         |         |
|---|----------|---------|---------|
| H | -3.46814 | 0.21248 | 0.00001 |
|---|----------|---------|---------|

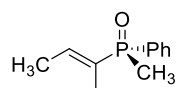

**3bw**

|   |          |          |          |
|---|----------|----------|----------|
| P | 0.45097  | 1.03819  | -0.38282 |
| O | 0.42518  | 2.36856  | 0.31916  |
| C | -3.58482 | -1.16179 | 0.05076  |
| C | -1.12269 | 0.13138  | -0.21281 |
| C | -1.26942 | -1.19445 | -0.63926 |
| H | -0.41856 | -1.72743 | -1.05626 |
| C | 2.58251  | -0.70721 | -0.62900 |
| H | 2.53604  | -0.42494 | -1.67801 |
| C | 1.70523  | -0.14699 | 0.23070  |
| C | -2.49816 | -1.83867 | -0.50919 |
| H | -2.60890 | -2.86831 | -0.83794 |
| C | -3.44065 | 0.15753  | 0.48193  |
| H | -4.28427 | 0.68147  | 0.92250  |
| C | -2.21126 | 0.80455  | 0.35121  |
| H | -2.07563 | 1.82790  | 0.68796  |
| C | 0.68260  | 1.18861  | -2.19346 |
| H | 1.65926  | 1.62631  | -2.41797 |
| H | 0.57110  | 0.23535  | -2.71717 |
| C | 1.06221  | 0.26244  | 2.61604  |
| H | 0.59075  | 1.21499  | 2.39825  |
| H | 1.06223  | -0.07393 | 3.64873  |
| C | 1.65240  | -0.47379 | 1.66463  |
| H | 2.13203  | -1.40618 | 1.95614  |
| H | -0.09340 | 1.87484  | -2.54450 |
| H | -4.54180 | -1.66581 | 0.15403  |
| C | 3.67335  | -1.68621 | -0.30959 |
| H | 3.72891  | -1.94225 | 0.74984  |
| H | 3.54163  | -2.61326 | -0.88335 |
| H | 4.64666  | -1.27248 | -0.60507 |

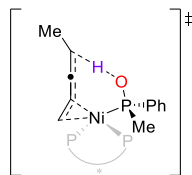

**TS-1a-S**

|   |          |         |         |
|---|----------|---------|---------|
| P | -2.00596 | 0.09989 | 0.37814 |
| P | 1.20553  | 1.31801 | 0.50974 |
| C | -1.83487 | 1.36669 | 1.76637 |
| H | -1.55668 | 2.30076 | 1.26484 |

|    |          |          |          |   |          |          |          |
|----|----------|----------|----------|---|----------|----------|----------|
| C  | -0.65492 | 0.92412  | 2.66283  | H | -3.29150 | -0.91414 | -1.95737 |
| C  | 0.72680  | 1.52783  | 2.32966  | C | -4.70436 | 2.04118  | -2.87811 |
| Ni | 0.16372  | -0.34518 | -0.45372 | H | -4.53257 | 3.88252  | -1.77026 |
| P  | 1.01668  | -2.12254 | 0.60860  | H | -4.69137 | 0.06431  | -3.74387 |
| O  | 0.07383  | -3.41583 | 0.54496  | H | -5.31014 | 2.47501  | -3.66851 |
| C  | 3.04091  | 1.20963  | 0.54879  | C | -3.10036 | 1.61389  | 2.59269  |
| C  | 3.84173  | 1.31355  | 1.69347  | H | -2.93009 | 2.43341  | 3.30244  |
| C  | 3.66344  | 0.97760  | -0.68906 | H | -3.95757 | 1.87891  | 1.96706  |
| C  | 5.23091  | 1.18363  | 1.60260  | H | -3.37391 | 0.72174  | 3.16377  |
| H  | 3.39687  | 1.50190  | 2.66461  | H | -0.87978 | 1.20366  | 3.70099  |
| C  | 5.04719  | 0.87220  | -0.78343 | H | -0.58619 | -0.16736 | 2.65823  |
| H  | 3.04849  | 0.85855  | -1.57655 | H | 1.45839  | 0.91028  | 2.86237  |
| C  | 5.83715  | 0.96959  | 0.36533  | C | 0.84490  | 2.96711  | 2.84409  |
| H  | 5.83688  | 1.25947  | 2.50133  | H | 1.83275  | 3.39436  | 2.65031  |
| H  | 5.50844  | 0.68495  | -1.74849 | H | 0.11121  | 3.62326  | 2.36525  |
| H  | 6.91680  | 0.87195  | 0.29607  | H | 0.66832  | 2.99264  | 3.92642  |
| C  | 0.98813  | 3.00622  | -0.20785 | H | -0.68624 | -3.25765 | -0.38358 |
| C  | 1.95891  | 4.01236  | -0.09129 | C | 0.20856  | -1.01126 | -2.43120 |
| C  | -0.20148 | 3.29725  | -0.88764 | C | -0.09300 | 0.37837  | -2.32488 |
| C  | 1.73083  | 5.28171  | -0.62301 | H | 0.65680  | 1.07588  | -2.68908 |
| H  | 2.89888  | 3.80154  | 0.40834  | H | -1.11706 | 0.71235  | -2.45025 |
| C  | -0.43702 | 4.56880  | -1.40898 | H | 1.21023  | -1.31582 | -2.73602 |
| H  | -0.93662 | 2.51717  | -1.02954 | C | -0.67093 | -2.02777 | -2.09585 |
| C  | 0.52960  | 5.56662  | -1.27643 | C | -1.28142 | -3.04420 | -1.64266 |
| H  | 2.49366  | 6.04964  | -0.52724 | C | -2.22301 | -4.08609 | -2.15034 |
| H  | -1.36996 | 4.76778  | -1.92939 | H | -1.79477 | -5.08479 | -2.00140 |
| H  | 0.35522  | 6.55636  | -1.68920 | H | -3.15643 | -4.05988 | -1.57444 |
| C  | -3.16457 | -1.13785 | 1.10904  | H | -2.46717 | -3.97011 | -3.21337 |
| C  | -4.55671 | -0.94564 | 1.12794  | C | 1.52295  | -2.06092 | 2.38160  |
| C  | -2.63829 | -2.30439 | 1.67945  | H | 0.63901  | -1.88736 | 3.00089  |
| C  | -5.39654 | -1.89108 | 1.71314  | H | 1.97971  | -3.01123 | 2.67340  |
| H  | -4.98536 | -0.05777 | 0.67581  | H | 2.23664  | -1.24991 | 2.55455  |
| C  | -3.48119 | -3.24895 | 2.26934  | C | 2.57960  | -2.65380 | -0.20034 |
| H  | -1.57737 | -2.51032 | 1.61774  | C | 3.83923  | -2.18507 | 0.19386  |
| C  | -4.86029 | -3.04515 | 2.29035  | C | 2.49385  | -3.51742 | -1.30405 |
| H  | -6.47096 | -1.72742 | 1.71726  | C | 4.98835  | -2.57331 | -0.49665 |
| H  | -3.05316 | -4.15212 | 2.69539  | H | 3.93674  | -1.50543 | 1.03344  |
| H  | -5.51660 | -3.78393 | 2.74240  | C | 3.64125  | -3.89831 | -1.99746 |
| C  | -3.12972 | 0.91656  | -0.82817 | H | 1.52215  | -3.89385 | -1.60697 |
| C  | -3.48621 | 2.27239  | -0.79844 | C | 4.89412  | -3.42723 | -1.59540 |
| C  | -3.57551 | 0.13306  | -1.90910 | H | 5.95596  | -2.19800 | -0.17559 |
| C  | -4.26504 | 2.83014  | -1.81618 | H | 3.55935  | -4.57017 | -2.84800 |
| H  | -3.16080 | 2.90897  | 0.01648  | H | 5.78927  | -3.72703 | -2.13370 |
| C  | -4.35766 | 0.68764  | -2.91890 |   |          |          |          |

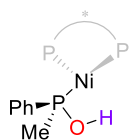

**TS-1a-S**

|   |          |          |          |    |          |          |          |
|---|----------|----------|----------|----|----------|----------|----------|
| P | -1.76068 | -0.81738 | -0.45433 | C  | -4.91351 | -3.10364 | 1.00411  |
| P | 1.61548  | -0.97393 | -0.60687 | H  | -5.28566 | -4.11960 | 0.90244  |
| C | -2.29500 | 0.72918  | -1.30530 | C  | 2.50866  | 2.94586  | -1.36151 |
| C | 3.23799  | -1.65857 | -0.05814 | H  | 2.58060  | 3.83941  | -0.74891 |
| C | -0.20696 | -1.75624 | -2.63783 | C  | -5.04384 | -0.91171 | 2.00089  |
| H | -0.15553 | -0.70017 | -2.93048 | H  | -5.52010 | -0.21081 | 2.68126  |
| H | -0.26164 | -2.32097 | -3.57977 | C  | 2.54903  | 1.85827  | -3.51689 |
| C | -3.30732 | -1.39184 | 0.36273  | H  | 2.66644  | 1.90631  | -4.59617 |
| C | 2.11227  | 0.54839  | -1.51591 | C  | 2.65914  | 3.01818  | -2.74891 |
| C | -1.54618 | -2.00563 | -1.90295 | H  | 2.85851  | 3.97240  | -3.22881 |
| H | -1.50502 | -2.99994 | -1.44379 | C  | -5.53766 | -2.21433 | 1.87674  |
| C | 1.11577  | -2.18209 | -1.94985 | H  | -6.39770 | -2.53129 | 2.45968  |
| H | 1.89625  | -2.19191 | -2.72266 | C  | -2.95519 | 3.11765  | -2.63473 |
| C | -1.30385 | 1.66873  | -1.62775 | H  | -3.21411 | 4.04122  | -3.14539 |
| H | -0.27782 | 1.48403  | -1.33746 | C  | 1.04062  | -3.59355 | -1.35192 |
| C | 5.61003  | -2.09021 | -0.33080 | H  | 0.39993  | -3.61615 | -0.46298 |
| H | 6.51964  | -1.99618 | -0.91807 | H  | 0.63269  | -4.30147 | -2.08417 |
| C | 4.41493  | -1.55397 | -0.81134 | H  | 2.03146  | -3.94614 | -1.05270 |
| H | 4.39913  | -1.03621 | -1.76637 | C  | -2.70100 | -1.97609 | -2.91263 |
| C | -3.93577 | -0.51092 | 1.26090  | H  | -2.71953 | -1.02419 | -3.45268 |
| H | -3.54765 | 0.49760  | 1.37672  | H  | -2.58520 | -2.78052 | -3.64996 |
| C | -3.62548 | 1.00664  | -1.65499 | H  | -3.67288 | -2.10000 | -2.42642 |
| H | -4.40779 | 0.29719  | -1.40580 | Ni | 0.00953  | -0.57236 | 0.73766  |
| C | -3.80941 | -2.69534 | 0.25068  | H  | 2.28189  | -0.42253 | 2.90446  |
| H | -3.34250 | -3.40652 | -0.42262 | C  | 0.35301  | 2.06896  | 2.34466  |
| C | 3.28021  | -2.31074 | 1.18309  | C  | -0.61724 | 2.67896  | 1.53423  |
| H | 2.36398  | -2.38692 | 1.76558  | C  | 1.46236  | 2.81885  | 2.75755  |
| C | 2.28134  | 0.63143  | -2.90504 | C  | -0.48089 | 4.00895  | 1.14139  |
| H | 2.19264  | -0.25591 | -3.52308 | H  | -1.46007 | 2.09597  | 1.17682  |
| C | 2.23495  | 1.72289  | -0.75302 | C  | 1.59944  | 4.15187  | 2.36322  |
| H | 2.08072  | 1.68211  | 0.31961  | H  | 2.21796  | 2.34465  | 3.37626  |
| C | -3.95241 | 2.19406  | -2.31011 | C  | 0.63118  | 4.74877  | 1.55229  |
| H | -4.98789 | 2.39777  | -2.56969 | H  | -1.23194 | 4.45733  | 0.49709  |
| C | 4.47321  | -2.85489 | 1.66133  | H  | 2.46541  | 4.72394  | 2.68662  |
| H | 4.49218  | -3.35894 | 2.62376  | H  | 0.74431  | 5.78338  | 1.23948  |
| C | 5.64120  | -2.74220 | 0.90456  | C  | -0.90785 | 0.20313  | 4.11838  |
| H | 6.57400  | -3.15567 | 1.27772  | H  | -1.88370 | 0.58739  | 3.80479  |
| C | -1.62851 | 2.85042  | -2.29392 | H  | -0.52717 | 0.79982  | 4.95386  |
| H | -0.84070 | 3.55973  | -2.53137 | P  | 0.23481  | 0.26028  | 2.67198  |
|   |          |          |          | O  | 1.65299  | -0.03696 | 3.53753  |
|   |          |          |          | H  | -1.03147 | -0.83623 | 4.43744  |

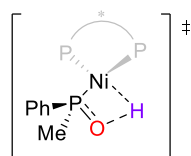

**TS-1-P**

|   |          |          |          |    |          |          |          |
|---|----------|----------|----------|----|----------|----------|----------|
| P | 1.16141  | -1.22550 | 0.63629  | C  | 3.43614  | -4.35893 | -0.75504 |
| P | -2.11343 | -0.50637 | 0.32238  | H  | 3.28415  | -5.42026 | -0.93118 |
| C | 1.91173  | 0.22471  | 1.47330  | C  | -1.98806 | 3.56847  | 0.62599  |
| C | -3.79102 | -0.77919 | -0.37261 | H  | -1.81014 | 4.38567  | -0.06722 |
| C | -0.80993 | -1.58655 | 2.62135  | C  | 4.82785  | -2.39351 | -0.86896 |
| H | -0.58149 | -0.54360 | 2.87238  | H  | 5.76735  | -1.91508 | -1.13225 |
| H | -1.02063 | -2.08457 | 3.57843  | C  | -2.40400 | 2.76942  | 2.86577  |
| C | 2.58367  | -2.22805 | 0.05520  | H  | -2.55580 | 2.96274  | 3.92414  |
| C | -2.22047 | 1.18542  | 1.03412  | C  | -2.17863 | 3.82781  | 1.98579  |
| C | 0.45951  | -2.25294 | 2.04379  | H  | -2.15158 | 4.84854  | 2.35693  |
| H | 0.16963  | -3.19594 | 1.56773  | C  | 4.64964  | -3.75873 | -1.09636 |
| C | -2.11558 | -1.66504 | 1.79253  | H  | 5.44671  | -4.34932 | -1.53860 |
| H | -2.93679 | -1.36531 | 2.45681  | C  | 2.90597  | 2.53582  | 2.72054  |
| C | 1.27243  | 1.46104  | 1.30572  | H  | 3.29561  | 3.42911  | 3.20117  |
| H | 0.40223  | 1.53041  | 0.66729  | C  | -2.41469 | -3.08943 | 1.30220  |
| C | -6.20554 | -0.82030 | -0.15313 | H  | -1.74171 | -3.38456 | 0.48905  |
| H | -7.09785 | -0.66275 | 0.44658  | H  | -2.29469 | -3.80973 | 2.12077  |
| C | -4.94727 | -0.58575 | 0.39745  | H  | -3.43748 | -3.16723 | 0.92500  |
| H | -4.86394 | -0.23497 | 1.42282  | C  | 1.45445  | -2.57291 | 3.16394  |
| C | 3.80536  | -1.63439 | -0.29948 | H  | 1.72296  | -1.67024 | 3.72142  |
| H | 3.95856  | -0.57581 | -0.12317 | H  | 1.01139  | -3.28473 | 3.87169  |
| C | 3.06849  | 0.16362  | 2.26829  | H  | 2.37321  | -3.01706 | 2.76823  |
| H | 3.59334  | -0.77766 | 2.39103  | Ni | -0.34984 | -0.57587 | -0.85669 |
| C | 2.41159  | -3.60011 | -0.19082 | H  | -1.37367 | 0.22685  | -1.93519 |
| H | 1.46929  | -4.08344 | 0.05120  | C  | 1.46968  | 1.87249B | -2.12100 |
| C | -3.91237 | -1.19883 | -1.70180 | C  | 2.81129  | 1.65626  | -1.77391 |
| H | -3.01316 | -1.31430 | -2.30039 | C  | 0.91724  | 3.14621  | -1.94195 |
| C | -2.42928 | 1.45573  | 2.39256  | C  | 3.58455  | 2.69099  | -1.25295 |
| H | -2.60037 | 0.64798  | 3.09608  | H  | 3.24671  | 0.66787  | -1.89585 |
| C | -2.00682 | 2.25887  | 0.15081  | C  | 1.69186  | 4.18402  | -1.41984 |
| H | -1.82468 | 2.05972  | -0.90118 | H  | -0.11984 | 3.30485  | -2.22168 |
| C | 3.56289  | 1.31287  | 2.88360  | C  | 3.02383  | 3.95798  | -1.06868 |
| H | 4.46159  | 1.25392  | 3.49168  | H  | 4.62047  | 2.50992  | -0.97823 |
| C | -5.17342 | -1.43533 | -2.25256 | H  | 1.25509  | 5.17068  | -1.28537 |
| H | -5.25879 | -1.75623 | -3.28685 | H  | 3.62295  | 4.76252  | -0.65106 |
| C | -6.31930 | -1.24920 | -1.47902 | C  | 1.23106  | -0.10636 | -4.16005 |
| H | -7.30109 | -1.42872 | -1.90833 | H  | 2.26098  | -0.40426 | -3.93546 |
| C | 1.75930  | 2.60785  | 1.93079  | H  | 1.23714  | 0.69041  | -4.91246 |
| H | 1.24750  | 3.55237  | 1.77872  | P  | 0.38271  | 0.48389  | -2.63184 |
|   |          |          |          | O  | -1.04399 | 1.10924  | -3.02344 |
|   |          |          |          | H  | 0.69118  | -0.97165 | -4.55554 |

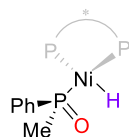

| INT-2-P |          |          |          |    |          |          |          |
|---------|----------|----------|----------|----|----------|----------|----------|
|         |          |          |          | H  | -3.21299 | -4.16592 | -1.94036 |
| P       | -0.88602 | 0.05252  | -1.02963 | C  | 2.44703  | 2.98006  | 2.08972  |
| P       | 2.37117  | -0.30336 | -0.34725 | H  | 2.07528  | 3.20644  | 3.08471  |
| C       | -1.35109 | 1.80077  | -0.76020 | C  | -4.78590 | -1.15568 | -1.77508 |
| C       | 3.88470  | -1.25546 | 0.05443  | H  | -5.77482 | -0.71287 | -1.85013 |
| C       | 1.29978  | 0.63252  | -2.77869 | C  | 3.54562  | 3.65816  | 0.04893  |
| H       | 1.24536  | 1.61911  | -2.30163 | H  | 4.04439  | 4.41725  | -0.54743 |
| H       | 1.53433  | 0.82319  | -3.83512 | C  | 3.09360  | 3.95987  | 1.33452  |
| C       | -2.41580 | -0.90108 | -1.35328 | H  | 3.23842  | 4.95703  | 1.74110  |
| C       | 2.70377  | 1.39089  | 0.27446  | C  | -4.61783 | -2.52691 | -1.96105 |
| C       | -0.08913 | -0.04060 | -2.73418 | H  | -5.47243 | -3.15448 | -2.19764 |
| H       | 0.03500  | -1.12249 | -2.85895 | C  | -1.89306 | 4.50620  | -0.23189 |
| C       | 2.48303  | -0.17197 | -2.20232 | H  | -2.10000 | 5.55389  | -0.03114 |
| H       | 3.40311  | 0.37299  | -2.44801 | C  | 2.60572  | -1.57518 | -2.81492 |
| C       | -0.89615 | 2.40121  | 0.42410  | H  | 1.82064  | -2.24964 | -2.45557 |
| H       | -0.38050 | 1.81187  | 1.17423  | H  | 2.52973  | -1.52024 | -3.90764 |
| C       | 6.29771  | -1.48469 | 0.11249  | H  | 3.56646  | -2.02950 | -2.56012 |
| H       | 7.28563  | -1.05604 | -0.03153 | C  | -0.95173 | 0.45516  | -3.90148 |
| C       | 5.16360  | -0.71406 | -0.13881 | H  | -0.97095 | 1.54797  | -3.94189 |
| H       | 5.27251  | 0.31526  | -0.46831 | H  | -0.52414 | 0.10017  | -4.84707 |
| C       | -3.69166 | -0.34377 | -1.47239 | H  | -1.98022 | 0.08782  | -3.83835 |
| H       | -3.84127 | 0.71456  | -1.29691 | Ni | 0.43018  | -0.83929 | 0.54025  |
| C       | -2.10250 | 2.57016  | -1.66710 | H  | 1.21337  | -1.55895 | 1.60852  |
| H       | -2.49370 | 2.12456  | -2.57257 | C  | -2.67334 | -0.69848 | 2.01694  |
| C       | -2.25740 | -2.28778 | -1.50967 | C  | -3.42331 | -1.83509 | 1.68437  |
| H       | -1.27519 | -2.73350 | -1.36851 | C  | -3.32033 | 0.53927  | 2.11559  |
| C       | 3.75734  | -2.57327 | 0.50959  | C  | -4.79746 | -1.73987 | 1.47716  |
| H       | 2.76402  | -2.97537 | 0.68497  | H  | -2.93314 | -2.79887 | 1.57863  |
| C       | 3.35380  | 2.38041  | -0.47798 | C  | -4.69534 | 0.63777  | 1.89377  |
| H       | 3.70688  | 2.16890  | -1.48236 | H  | -2.73452 | 1.41108  | 2.38673  |
| C       | 2.24858  | 1.70277  | 1.56687  | C  | -5.43729 | -0.50186 | 1.58125  |
| H       | 1.69138  | 0.97310  | 2.14961  | H  | -5.36794 | -2.62740 | 1.21857  |
| C       | -2.37099 | 3.91201  | -1.40273 | H  | -5.18828 | 1.60329  | 1.97615  |
| H       | -2.95448 | 4.49322  | -2.11146 | H  | -6.50866 | -0.42765 | 1.41362  |
| C       | 4.89368  | -3.34569 | 0.75455  | C  | -0.76252 | -2.19538 | 3.48243  |
| H       | 4.78617  | -4.36693 | 1.10924  | H  | -1.02469 | -3.12788 | 2.97087  |
| C       | 6.16392  | -2.80311 | 0.55565  | H  | -1.43385 | -2.04466 | 4.33447  |
| H       | 7.04873  | -3.40187 | 0.75292  | P  | -0.85910 | -0.76256 | 2.32512  |
| C       | -1.16247 | 3.74676  | 0.68065  | O  | -0.42270 | 0.54710  | 2.99797  |
| H       | -0.79842 | 4.19104  | 1.60220  | H  | 0.27024  | -2.26975 | 3.83315  |
| C       | -3.34915 | -3.09477 | -1.81927 |    |          |          |          |

**8. ORTEP drawing of 3ka at 50% probability.**

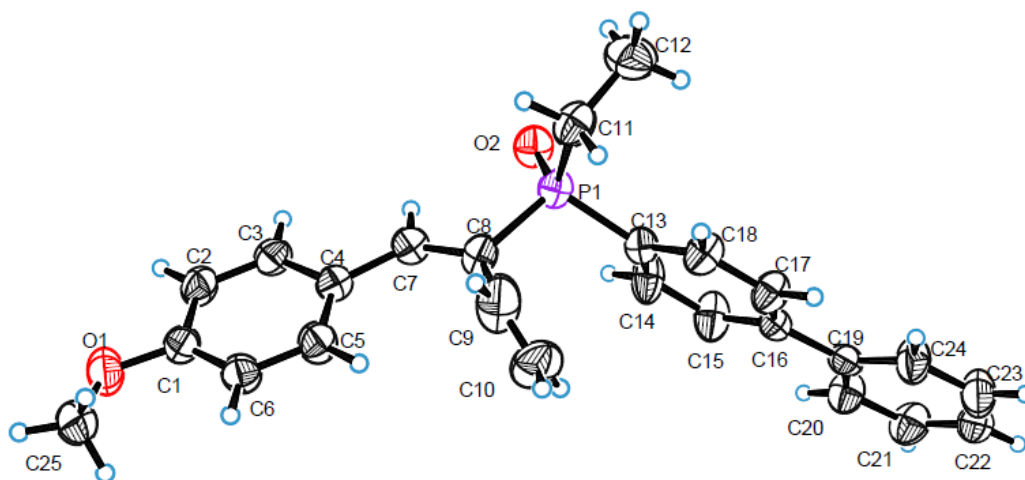

These data can be obtained free of charge from the Cambridge crystallographic data centre (CCDC 2056434).



## 9. Spectroscopic data of products.

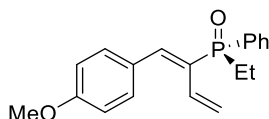

**3aa:** 89% yield, colorless oil.

**<sup>1</sup>H NMR** (500 MHz, Chloroform-*d*)  $\delta$  7.86 – 7.68 (m, 2H), 7.55 – 7.44 (m, 5H), 7.40 (d,  $J$  = 19.5 Hz, 1H), 6.90 (d,  $J$  = 8.8 Hz, 2H), 6.60 (dddd,  $J$  = 18.1, 16.7, 11.6, 1.5 Hz, 1H), 5.33 – 5.29 (m, 1H), 5.28 (td,  $J$  = 2.8, 1.2 Hz, 1H), 3.83 (s, 3H), 2.37 – 2.14 (m, 2H), 1.22 (dt,  $J$  = 17.3, 7.7 Hz, 3H).

**<sup>13</sup>C NMR** (126 MHz, Chloroform-*d*)  $\delta$  160.1, 142.2 (d,  $J$  = 8.0 Hz), 133.2 (d,  $J$  = 97.0 Hz), 131.9 (d,  $J$  = 9.2 Hz), 131.8, 131.5 (d,  $J$  = 2.6 Hz), 130.8 (d,  $J$  = 9.2 Hz), 129.0 (d,  $J$  = 90.7 Hz), 128.6 (d,  $J$  = 11.5 Hz), 128.2 (d,  $J$  = 17.0 Hz), 120.3 (d,  $J$  = 5.9 Hz), 113.8, 55.3, 20.2 (d,  $J$  = 73.7 Hz), 5.4 (d,  $J$  = 4.7 Hz).

**<sup>31</sup>P NMR** (202 MHz, Chloroform-*d*)  $\delta$  36.0.

**HRMS** (ESI)  $[M+H]^+$ : calcd. 313.1357, found. 313.1360.

**Optical Rotation:**  $[\alpha]_D^{20}$  = +99.0 ( $c$  = 0.847, acetone).

**HPLC:** Daicel Chiralcel OD-H (91 % ee), *n*-Hexanes/*i*-PrOH = 90/10, 1 mL/min,  $\lambda$  = 297 nm,  $t$  (major) = 13.4 min,  $t$  (minor) = 14.5 min.

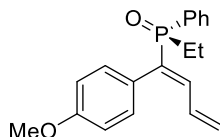

**3aa':** colorless oil.

**<sup>1</sup>H NMR** (400 MHz, Chloroform-*d*)  $\delta$  7.59 – 7.46 (m, 3H), 7.41 (td,  $J$  = 7.5, 2.5 Hz, 2H), 7.22 (dd,  $J$  = 17.6, 11.0 Hz, 1H), 6.81 (s, 4H), 6.34 – 6.14 (m, 1H), 5.56 (d,  $J$  = 16.9 Hz, 1H), 5.32 (dd,  $J$  = 10.0, 2.0 Hz, 1H), 3.80 (s, 3H), 1.98 (dq,  $J$  = 11.0, 7.5 Hz, 2H), 1.16 (dt,  $J$  = 17.0, 7.6 Hz, 3H).

**<sup>13</sup>C NMR** (101 MHz, Chloroform-*d*)  $\delta$  159.1, 142.7 (d,  $J$  = 8.0 Hz), 136.2 (d,  $J$  = 91.0 Hz), 132.7 (d,  $J$  = 15.4 Hz), 131.6 (d,  $J$  = 97.2 Hz), 131.5 (d,  $J$  = 2.7 Hz), 131.1 (d,  $J$  = 8.7 Hz), 130.7 (d,  $J$  = 4.1 Hz), 128.3 (d,  $J$  = 11.4 Hz), 127.2 (d,  $J$  = 10.3 Hz), 124.1, 113.8, 55.2, 20.1 (d,  $J$  = 74.2 Hz), 5.2 (d,  $J$  = 5.0 Hz).

**<sup>31</sup>P NMR** (162 MHz, Chloroform-*d*)  $\delta$  33.7.

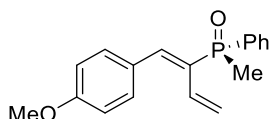

**3ba:** 74% yield, colorless oil.

**<sup>1</sup>H NMR** (500 MHz, Chloroform-*d*)  $\delta$  7.76 (ddt,  $J$  = 11.9, 6.7, 1.5 Hz, 2H), 7.57 – 7.47 (m, 3H), 7.45 (d,  $J$  = 8.7 Hz, 2H), 7.37 (d,  $J$  = 20.4 Hz, 1H), 6.90 (d,  $J$  = 8.8 Hz, 2H), 6.61 (tdd,  $J$  = 17.9, 11.6, 1.4 Hz, 1H), 5.37 – 5.27 (m, 1H), 5.31 (dd,  $J$  = 2.7, 1.4 Hz, 1H), 3.83 (s, 3H), 1.94 (d,  $J$  = 13.1 Hz, 3H).

**<sup>13</sup>C NMR** (126 MHz, Chloroform-*d*)  $\delta$  160.2, 141.6 (d,  $J$  = 8.7 Hz), 134.1 (d,  $J$  = 100.6 Hz), 131.8, 131.7 (d,  $J$  = 9.3 Hz), 131.6 (d,  $J$  = 2.7 Hz), 130.5 (d,  $J$  = 9.8 Hz), 129.9, 128.6 (d,  $J$  = 11.8 Hz), 128.0 (d,  $J$  = 17.3 Hz), 120.5 (d,  $J$  = 6.0 Hz), 113.8, 55.3, 14.8 (d,  $J$  = 74.6 Hz).

**<sup>31</sup>P NMR** (202 MHz, Chloroform-*d*)  $\delta$  31.8.

**HRMS** (ESI)  $[M+H]^+$ : calcd. 299.1201, found. 299.1196.

**Optical Rotation:**  $[\alpha]_D^{20}$  = +97.3 ( $c$  = 0.987, acetone).

**HPLC:** Daicel Chiralcel AD-H (80 % ee), *n*-Hexanes/*i*-PrOH = 70/30, 1 mL/min,  $\lambda$  = 297 nm,  $t$  (major) = 7.3 min,  $t$  (minor) = 11.7 min.

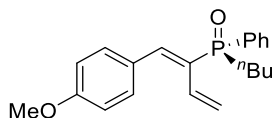

**3ca:** 89% yield, yellow oil.

**<sup>1</sup>H NMR** (500 MHz, Chloroform-*d*) δ 7.89 – 7.69 (m, 2H), 7.55 – 7.45 (m, 5H), 7.41 (d, *J* = 19.6 Hz, 1H), 6.90 (d, *J* = 8.9 Hz, 2H), 6.60 (dddd, *J* = 18.4, 17.0, 11.7, 1.5 Hz, 1H), 5.30 (dd, *J* = 2.6, 0.8 Hz, 1H), 5.29 – 5.26 (m, 1H), 3.83 (s, 3H), 2.40 – 2.12 (m, 2H), 1.80 – 1.57 (m, 2H), 1.58 – 1.35 (m, 2H), 0.91 (t, *J* = 7.3 Hz, 3H).

**<sup>13</sup>C NMR** (126 MHz, Chloroform-*d*) δ 160.0, 142.0 (d, *J* = 7.8 Hz), 133.5 (d, *J* = 97.0 Hz), 131.9 (d, *J* = 9.2 Hz), 131.8, 131.5 (d, *J* = 2.7 Hz), 130.7 (d, *J* = 9.2 Hz), 129.2 (d, *J* = 90.8 Hz), 128.5 (d, *J* = 11.5 Hz), 128.1 (d, *J* = 16.6 Hz), 120.3 (d, *J* = 5.8 Hz), 113.7, 55.2, 26.8 (d, *J* = 73.0 Hz), 24.1 (d, *J* = 15.3 Hz), 23.3 (d, *J* = 3.8 Hz), 13.6.

**<sup>31</sup>P NMR** (202 MHz, Chloroform-*d*) δ 34.3.

**HRMS** (ESI) [M+H]<sup>+</sup>: calcd. 341.1670, found. 341.1677.

**Optical Rotation:** [ $\alpha$ ]<sub>D</sub><sup>20</sup> = +79.1 (*c* = 1.45, acetone).

**HPLC:** Daicel Chiralcel AD-H (93 % ee), *n*-Hexanes/*i*-PrOH = 70/30, 1 mL/min,  $\lambda$  = 299 nm, *t* (major) = 7.4 min, *t* (minor) = 14.0 min.

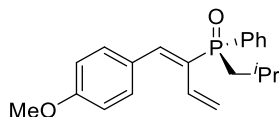

**3da:** 85% yield, light yellow oil.

**<sup>1</sup>H NMR** (500 MHz, Chloroform-*d*) δ 7.76 (ddt, *J* = 9.7, 6.8, 1.5 Hz, 2H), 7.55 – 7.39 (m, 6H), 6.99 – 6.80 (m, 2H), 6.58 (dddd, *J* = 18.0, 16.4, 11.6, 1.4 Hz, 1H), 5.29 (dq, *J* = 2.5, 1.3 Hz, 1H), 5.28 (ddd, *J* = 31.1, 2.6, 1.4 Hz, 1H), 3.83 (s, 3H), 2.30 – 2.11 (m, 3H), 1.07 (dd, *J* = 9.4, 6.0 Hz, 6H).

**<sup>13</sup>C NMR** (126 MHz, Chloroform-*d*) δ 160.0, 141.8 (d, *J* = 7.7 Hz), 134.0 (d, *J* = 96.5 Hz), 132.1 (d, *J* = 9.2 Hz), 131.8, 131.4 (d, *J* = 2.8 Hz), 130.8 (d, *J* = 9.2 Hz), 130.1 (d, *J* = 90.2 Hz), 128.5 (d, *J* = 11.4 Hz), 128.2 (d, *J* = 16.6 Hz), 120.4 (d, *J* = 5.8 Hz), 113.7, 55.3, 35.4 (d, *J* = 71.9 Hz), 24.7 (dd, *J* = 19.5, 8.9 Hz), 23.6 (d, *J* = 3.7 Hz).

**<sup>31</sup>P NMR** (202 MHz, Chloroform-*d*) δ 32.6.

**HRMS** (ESI) [M+H]<sup>+</sup>: calcd. 341.1670, found. 341.1674.

**Optical Rotation:** [ $\alpha$ ]<sub>D</sub><sup>20</sup> = +50.6 (*c* = 0.887, acetone).

**HPLC:** Daicel Chiralcel AD-H (93 % ee), *n*-Hexanes/*i*-PrOH = 70/30, 1 mL/min,  $\lambda$  = 297 nm, *t* (major) = 6.1 min, *t* (minor) = 15.0 min.

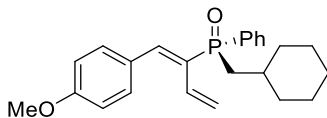

**3ea:** 53% yield, colorless oil.

**<sup>1</sup>H NMR** (500 MHz, Chloroform-*d*) δ 7.85 – 7.67 (m, 2H), 7.53 – 7.44 (m, 5H), 7.42 (d, *J* = 19.9 Hz, 1H), 6.89 (d, *J* = 8.8 Hz, 2H), 6.58 (dddd, *J* = 18.0, 16.5, 11.6, 1.4 Hz, 1H), 5.28 (dt, *J* = 2.6, 1.5 Hz, 1H), 5.27 (ddd, *J* = 31.2, 2.6, 1.4 Hz, 1H), 3.83 (s, 3H), 2.17 (qdd, *J* = 15.1, 11.2, 6.1 Hz, 2H), 1.96 – 1.77 (m, 3H), 1.62 (ddtd, *J* = 19.6, 12.4, 3.6, 1.6 Hz, 3H), 1.25 (ddt, *J* = 12.9, 9.4, 3.3 Hz, 2H), 1.17 – 1.02 (m, 3H).

**<sup>13</sup>C NMR** (126 MHz, Chloroform-*d*) δ 160.2, 142.5 (d, *J* = 7.8 Hz), 141.4 (d, *J* = 15.3 Hz), 133.2 (d, *J* = 97.5 Hz), 131.9, 131.8, 131.7 (d, *J* = 2.7 Hz), 130.8 (d, *J* = 9.3 Hz), 129.2, 128.7 (d, *J* = 11.6 Hz), 128.4,

128.4 (d,  $J = 56.4$  Hz), 128.0, 126.3, 120.5 (d,  $J = 5.9$  Hz), 113.8, 55.3, 29.3 (d,  $J = 70.7$  Hz), 27.5 (d,  $J = 2.9$  Hz).

$^{31}\text{P}$  NMR (202 MHz, Chloroform- $d$ )  $\delta$  33.1.

HRMS(ESI)  $[\text{M}+\text{Na}]^+$ : calcd. 403.1803, found. 403.1804

**Optical Rotation:**  $[\alpha]_{\text{D}}^{20} = +36.0$  ( $c = 0.807$ , acetone).

**HPLC:** Daicel Chiralcel OD-H (93 % ee), *n*-Hexanes/*i*-PrOH = 95/5, 1 mL/min,  $\lambda = 296$  nm,  $t$  (major) = 13.1 min,  $t$  (minor) = 15.1 min.

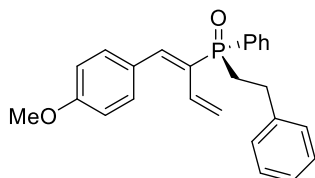

**3fa:** 93% yield, colorless oil.

$^1\text{H}$  NMR (500 MHz, Chloroform- $d$ )  $\delta$  7.83 – 7.74 (m, 2H), 7.57 – 7.43 (m, 6H), 7.31 – 7.15 (m, 5H), 6.90 (d,  $J = 8.8$  Hz, 2H), 6.61 (dddd,  $J = 18.0, 16.8, 12.0, 1.5$  Hz, 1H), 5.32 (d,  $J = 2.5$  Hz, 1H), 5.29 (dt,  $J = 8.0, 1.4$  Hz, 1H), 3.83 (s, 3H), 3.03 – 2.91 (m, 2H), 2.62 – 2.49 (m, 2H).

$^{13}\text{C}$  NMR (126 MHz, Chloroform- $d$ )  $\delta$  160.2, 142.5 (d,  $J = 7.8$  Hz), 141.4 (d,  $J = 15.3$  Hz), 133.2 (d,  $J = 97.5$  Hz), 131.9, 131.8, 131.7 (d,  $J = 2.7$  Hz), 130.8 (d,  $J = 9.3$  Hz), 128.8 (d,  $J = 91.1$  Hz), 128.8 – 128.5 (m), 128.1, 128.0, 120.5 (d,  $J = 5.9$  Hz), 113.8, 55.3, 29.3 (d,  $J = 70.7$  Hz), 27.5 (d,  $J = 2.9$  Hz).

$^{31}\text{P}$  NMR (202 MHz, Chloroform- $d$ )  $\delta$  33.1.

HRMS (ESI)  $[\text{M}+\text{H}]^+$ : calcd. 389.1670, found. 389.1663.

**Optical Rotation:**  $[\alpha]_{\text{D}}^{20} = +80.9$  ( $c = 1.45$ , acetone).

**HPLC:** Daicel Chiralcel AD-H (90 % ee), *n*-Hexanes/*i*-PrOH = 70/30, 1 mL/min,  $\lambda = 299$  nm,  $t$  (major) = 12.3 min,  $t$  (minor) = 20.3 min.

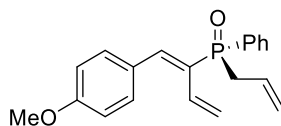

**3ga:** 90% yield, yellow oil.

$^1\text{H}$  NMR (500 MHz, Chloroform- $d$ )  $\delta$  7.80 – 7.74 (m, 2H), 7.55 – 7.47 (m, 3H), 7.46 (d,  $J = 8.8$  Hz, 2H), 7.38 (d,  $J = 19.9$  Hz, 1H), 6.89 (d,  $J = 8.8$  Hz, 2H), 6.61 (dddd,  $J = 18.5, 17.5, 11.6, 1.4$  Hz, 1H), 5.93 – 5.82 (m, 1H), 5.36 – 5.33 (m, 1H), 5.33 – 5.31 (m, 1H), 5.24 – 5.22 (m, 1H), 5.21 – 5.19 (m, 1H), 3.83 (s, 3H), 3.12 (ddt,  $J = 14.2, 7.4, 1.3$  Hz, 2H).

$^{13}\text{C}$  NMR (126 MHz, Chloroform- $d$ )  $\delta$  160.2, 142.7 (d,  $J = 8.0$  Hz), 132.9 (d,  $J = 97.6$  Hz), 131.9, 131.9 (d,  $J = 9.2$  Hz), 131.7 (d,  $J = 2.7$  Hz), 131.0 (d,  $J = 9.3$  Hz), 128.8 (d,  $J = 92.3$  Hz), 128.5 (d,  $J = 11.6$  Hz), 128.0 (d,  $J = 17.1$  Hz), 127.3 (d,  $J = 9.0$  Hz), 120.6 (d,  $J = 18.6$  Hz), 120.6, 113.8, 55.3, 33.6 (d,  $J = 69.8$  Hz).

$^{31}\text{P}$  NMR (202 MHz, Chloroform- $d$ )  $\delta$  31.7.

HRMS (ESI)  $[\text{M}+\text{H}]^+$ : calcd. 325.1357, found. 325.1353.

**Optical Rotation:**  $[\alpha]_{\text{D}}^{20} = +79.6$  ( $c = 0.920$ , acetone).

**HPLC:** Daicel Chiralcel AD-H (85 % ee), *n*-Hexanes/*i*-PrOH = 70/30, 1 mL/min,  $\lambda = 254$  nm,  $t$  (major) = 7.8 min,  $t$  (minor) = 17.9 min.

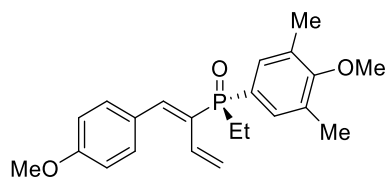

**3ha:** 68% yield, colorless oil.

**<sup>1</sup>H NMR** (500 MHz, Chloroform-*d*)  $\delta$  7.48 (d,  $J$  = 8.5 Hz, 2H), 7.43 – 7.31 (m, 3H), 6.90 (d,  $J$  = 8.5 Hz, 2H), 6.61 (td,  $J$  = 17.6, 11.9 Hz, 1H), 5.36 – 5.28 (m, 1H), 5.34 – 5.27 (m, 1H), 3.83 (s, 3H), 3.74 (s, 3H), 2.31 (s, 6H), 2.24 – 2.16 (m, 2H), 1.21 (dt,  $J$  = 17.1, 7.6 Hz, 3H).

**<sup>13</sup>C NMR** (126 MHz, Chloroform-*d*)  $\delta$  159.9, 159.7 (d,  $J$  = 3.2 Hz), 141.9 (d,  $J$  = 7.8 Hz), 131.9 (d,  $J$  = 9.2 Hz), 131.8, 131.4 (d,  $J$  = 9.9 Hz), 131.4 (d,  $J$  = 12.7 Hz), 129.1 (d,  $J$  = 90.7 Hz), 128.2 (d,  $J$  = 3.4 Hz), 127.8 (d,  $J$  = 78.9 Hz), 120.2 (d,  $J$  = 5.7 Hz), 113.6, 59.6, 55.2, 20.0 (d,  $J$  = 73.8 Hz), 16.2, 5.4 (d,  $J$  = 4.9 Hz).

**<sup>31</sup>P NMR** (202 MHz, Chloroform-*d*)  $\delta$  35.6.

**HRMS** (ESI) [M+H]<sup>+</sup>: calcd. 371.1776, found. 371.1781.

**Optical Rotation:** [ $\alpha$ ]<sub>D</sub><sup>20</sup> = +61.6 ( $c$  = 1.63, acetone).

**HPLC:** Daicel Chiralcel OD-H (92 % ee), *n*-Hexanes/*i*-PrOH = 90/10, 1 mL/min,  $\lambda$  = 296 nm,  $t$  (major) = 10.4 min,  $t$  (minor) = 12.1 min.

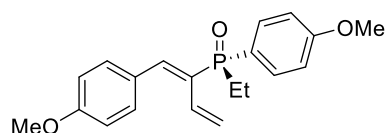

**3ia:** 53% yield, colorless oil.

**<sup>1</sup>H NMR** (500 MHz, Chloroform-*d*)  $\delta$  7.68 (dd,  $J$  = 10.9, 8.7 Hz, 2H), 7.46 (d,  $J$  = 8.8 Hz, 2H), 7.37 (d,  $J$  = 19.5 Hz, 1H), 6.99 (dd,  $J$  = 8.8, 2.1 Hz, 2H), 6.89 (d,  $J$  = 8.8 Hz, 2H), 6.60 (dddd,  $J$  = 18.2, 16.8, 11.7, 1.5 Hz, 1H), 5.34 – 5.30 (m, 1H), 5.29 – 5.27 (m, 1H), 3.85 (s, 3H), 3.83 (s, 3H), 2.29 – 2.15 (m, 2H), 1.20 (dt,  $J$  = 17.3, 7.6 Hz, 3H).

**<sup>13</sup>C NMR** (126 MHz, Chloroform-*d*)  $\delta$  162.2 (d,  $J$  = 2.8 Hz), 160.0, 142.0 (d,  $J$  = 7.9 Hz), 132.7 (d,  $J$  = 10.5 Hz), 132.0 (d,  $J$  = 9.1 Hz), 131.8, 129.3 (d,  $J$  = 91.4 Hz), 128.2 (d,  $J$  = 16.8 Hz), 124.2 (d,  $J$  = 102.9 Hz), 120.2 (d,  $J$  = 5.7 Hz), 114.1 (d,  $J$  = 12.4 Hz), 113.7, 55.3, 55.3, 20.3 (d,  $J$  = 74.1 Hz), 5.5 (d,  $J$  = 4.9 Hz).

**<sup>31</sup>P NMR** (202 MHz, Chloroform-*d*)  $\delta$  35.8.

**HRMS** (ESI) [M+Na]<sup>+</sup>: calcd. 365.1283, found. 365.1291.

**Optical Rotation:** [ $\alpha$ ]<sub>D</sub><sup>20</sup> = +69.9 ( $c$  = 0.800, acetone).

**HPLC:** Daicel Chiralcel OD-H (95 % ee), *n*-Hexanes/*i*-PrOH = 90/10, 1 mL/min,  $\lambda$  = 296 nm,  $t$  (major) = 15.0 min,  $t$  (minor) = 20.1 min.

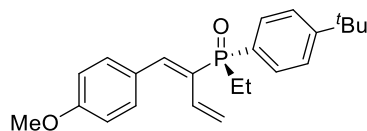

**3ja:** 76% yield, colorless oil.

**<sup>1</sup>H NMR** (500 MHz, Chloroform-*d*)  $\delta$  7.71 – 7.62 (m, 2H), 7.54 – 7.45 (m, 4H), 7.41 (d,  $J$  = 19.5 Hz, 1H), 6.89 (d,  $J$  = 8.8 Hz, 2H), 6.61 (dddd,  $J$  = 18.2, 16.8, 11.6, 1.4 Hz, 1H), 5.31 (ddd,  $J$  = 25.3, 2.6, 1.4 Hz, 1H), 5.33 – 5.30 (m, 1H), 3.83 (s, 3H), 2.37 – 2.16 (m, 2H), 1.33 (s, 9H), 1.28 – 1.13 (m, 3H).

$^{13}\text{C}$  NMR (126 MHz, Chloroform-*d*)  $\delta$  160.0, 154.96 (d,  $J = 2.7$  Hz), 142.1 (d,  $J = 7.7$  Hz), 132.0 (d,  $J = 9.1$  Hz), 131.8, 130.6 (d,  $J = 9.4$  Hz), 129.8 (d,  $J = 91.9$  Hz), 129.0 (d,  $J = 83.2$  Hz), 128.2 (d,  $J = 16.7$  Hz), 125.5 (d,  $J = 11.5$  Hz), 120.2 (d,  $J = 5.7$  Hz), 113.7, 55.2, 34.9, 31.1, 20.1 (d,  $J = 73.9$  Hz), 5.4 (d,  $J = 4.9$  Hz).

$^{31}\text{P}$  NMR (202 MHz, Chloroform-*d*)  $\delta$  36.0.

HRMS (ESI)  $[\text{M}+\text{Na}]^+$ : calcd. 391.1803, found. 391.1799.

Optical Rotation:  $[\alpha]_{\text{D}}^{20} = +73.5$  ( $c = 1.55$ , acetone).

HPLC: Daicel Chiralcel AD-H (95 % ee), *n*-Hexanes/*i*-PrOH = 60/40, 1 mL/min,  $\lambda = 299$  nm,  $t$  (major) = 5.4 min,  $t$  (minor) = 15.2 min.

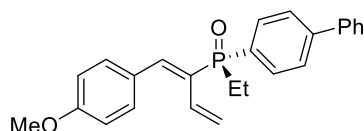

**3ka**: 90% yield, white powder.

$^1\text{H}$  NMR (500 MHz, Chloroform-*d*)  $\delta$  7.86 – 7.79 (m, 2H), 7.73 – 7.68 (m, 2H), 7.64 – 7.60 (m, 2H), 7.52 – 7.36 (m, 6H), 6.90 (d,  $J = 8.8$  Hz, 2H), 6.63 (dddd,  $J = 18.2, 16.8, 11.6, 1.4$  Hz, 1H), 5.36 (ddd,  $J = 18.4, 2.5, 1.4$  Hz, 1H), 5.34 – 5.31 (m, 1H), 3.83 (s, 3H), 2.32 – 2.24 (m, 2H), 1.35 – 1.15 (m, 3H).

$^{13}\text{C}$  NMR (126 MHz, Chloroform-*d*)  $\delta$  160.1, 144.3 (d,  $J = 2.8$  Hz), 142.3 (d,  $J = 7.9$  Hz), 140.0, 131.9 (d,  $J = 9.1$  Hz), 131.8, 131.7 (d,  $J = 98.2$  Hz), 131.4 (d,  $J = 9.5$  Hz), 128.9 (d,  $J = 91.0$  Hz), 128.9, 128.1 (d,  $J = 16.9$  Hz), 128.0, 127.2 (d,  $J = 11.8$  Hz), 127.2, 120.4 (d,  $J = 5.8$  Hz), 113.8, 55.3, 20.2 (d,  $J = 74.0$  Hz), 5.5 (d,  $J = 5.0$  Hz).

$^{31}\text{P}$  NMR (202 MHz, Chloroform-*d*)  $\delta$  36.0.

HRMS (ESI)  $[\text{M}+\text{Na}]^+$ : calcd. 411.1490, found. 411.1491.

Optical Rotation:  $[\alpha]_{\text{D}}^{20} = +61.6$  ( $c = 0.947$ , acetone).

HPLC: Daicel Chiralcel AS-H (88 % ee), *n*-Hexanes/*i*-PrOH = 80/20, 1 mL/min,  $\lambda = 306$  nm,  $t$  (major) = 13.4 min,  $t$  (minor) = 15.8 min.

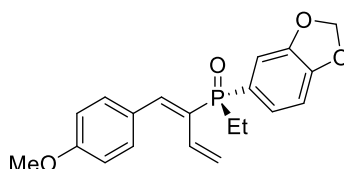

**3la**: 80% yield, colorless oil.

$^1\text{H}$  NMR (500 MHz, Chloroform-*d*)  $\delta$  7.46 (d,  $J = 8.7$  Hz, 2H), 7.37 (d,  $J = 19.6$  Hz, 1H), 7.28 (ddd,  $J = 11.8, 7.9, 1.5$  Hz, 1H), 7.17 (dd,  $J = 10.7, 1.5$  Hz, 1H), 6.94 – 6.87 (m, 3H), 6.60 (dddd,  $J = 18.2, 16.9, 11.6, 1.4$  Hz, 1H), 6.02 (s, 2H), 5.35 (dt,  $J = 18.6, 1.8$  Hz, 1H), 5.33 – 5.29 (m, 1H), 3.83 (s, 3H), 2.27 – 2.12 (m, 2H), 1.21 (dt,  $J = 17.4, 7.6$  Hz, 3H).

$^{13}\text{C}$  NMR (126 MHz, Chloroform-*d*)  $\delta$  160.0, 150.4 (d,  $J = 2.8$  Hz), 148.0 (d,  $J = 17.1$  Hz), 142.0 (d,  $J = 8.0$  Hz), 131.9 (d,  $J = 9.1$  Hz), 131.8, 129.1 (d,  $J = 91.5$  Hz), 128.1 (d,  $J = 16.8$  Hz), 126.2 (d,  $J = 100.5$  Hz), 126.0 (d,  $J = 10.1$  Hz), 120.3 (d,  $J = 5.7$  Hz), 113.7, 110.4 (d,  $J = 11.8$  Hz), 108.7 (d,  $J = 14.3$  Hz), 101.5, 55.3, 20.3 (d,  $J = 74.5$  Hz), 5.5 (d,  $J = 4.9$  Hz).

$^{31}\text{P}$  NMR (202 MHz, Chloroform-*d*)  $\delta$  36.0.

HRMS (ESI)  $[\text{M}+\text{Na}]^+$ : calcd. 379.1075, found. 379.1076.

Optical Rotation:  $[\alpha]_{\text{D}}^{20} = +75.8$  ( $c = 0.827$ , acetone).

HPLC: Daicel Chiralcel OJ-H (90 % ee), *n*-Hexanes/*i*-PrOH = 80/20, 1 mL/min,  $\lambda = 296$  nm,  $t$  (major)

= 8.9 min, *t* (minor) = 7.8 min.

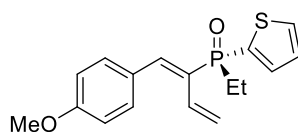

**3ma:** 89% yield, light yellow oil.

**<sup>1</sup>H NMR** (500 MHz, Chloroform-*d*)  $\delta$  7.70 (ddd, *J* = 4.7, 3.7, 1.1 Hz, 1H), 7.58 (ddd, *J* = 6.7, 3.6, 1.1 Hz, 1H), 7.51 – 7.44 (m, 3H), 7.19 (ddd, *J* = 5.1, 3.5, 1.7 Hz, 1H), 6.90 (d, *J* = 8.8 Hz, 2H), 6.61 (tdd, *J* = 17.6, 12.0, 1.4 Hz, 1H), 5.38 – 5.36 (m, 1H), 5.33 (ddd, *J* = 6.5, 2.8, 1.3 Hz, 1H), 3.83 (s, 3H), 2.37 – 2.17 (m, 2H), 1.25 (dt, *J* = 18.4, 7.6 Hz, 3H).

**<sup>13</sup>C NMR** (126 MHz, Chloroform-*d*)  $\delta$  160.1, 142.6 (d, *J* = 8.1 Hz), 135.0 (d, *J* = 9.1 Hz), 134.0 (d, *J* = 102.1 Hz), 132.6 (d, *J* = 4.5 Hz), 131.9, 131.6 (d, *J* = 9.7 Hz), 128.7 (d, *J* = 96.2 Hz), 128.1 (d, *J* = 12.8 Hz), 127.9, 120.4 (d, *J* = 6.0 Hz), 113.7, 55.2, 22.3 (d, *J* = 77.4 Hz), 5.4 (d, *J* = 5.0 Hz).

**<sup>31</sup>P NMR** (202 MHz, Chloroform-*d*)  $\delta$  29.6.

**HRMS** (ESI) [M+Na]<sup>+</sup>: calcd. 341.0741, found. 341.0804

**Optical Rotation:** [ $\alpha$ ]<sub>D</sub><sup>20</sup> = +76.7 (*c* = 1.63, acetone).

**HPLC:** Daicel Chiralcel AD-H (88 % ee), *n*-Hexanes/*i*-PrOH = 80/20, 1 mL/min,  $\lambda$  = 298 nm, *t* (major) = 10.6 min, *t* (minor) = 21.4 min.

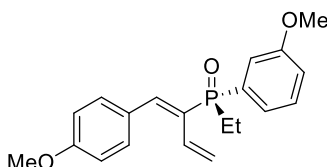

**3na:** 90% yield, light yellow oil.

**<sup>1</sup>H NMR** (500 MHz, Chloroform-*d*)  $\delta$  7.46 (d, *J* = 8.8 Hz, 2H), 7.41 – 7.27 (m, 4H), 7.05 (dd, *J* = 8.3, 2.6 Hz, 1H), 6.90 (d, *J* = 8.7 Hz, 2H), 6.60 (dddd, *J* = 18.2, 16.8, 11.6, 1.4 Hz, 1H), 5.36 (dt, *J* = 18.2, 1.7 Hz, 1H), 5.31 (ddt, *J* = 11.6, 2.6, 1.2 Hz, 1H), 3.84 (s, 3H), 3.83 (s, 3H), 2.29 – 2.18 (m, 2H), 1.27 – 1.13 (m, 3H).

**<sup>13</sup>C NMR** (126 MHz, Chloroform-*d*)  $\delta$  160.0, 159.6 (d, *J* = 14.2 Hz), 142.1 (d, *J* = 8.1 Hz), 134.4 (d, *J* = 96.1 Hz), 131.8 (d, *J* = 9.1 Hz), 131.8, 129.7 (d, *J* = 13.5 Hz), 128.9 (d, *J* = 90.9 Hz), 128.1 (d, *J* = 16.7 Hz), 122.8 (d, *J* = 9.4 Hz), 120.4 (d, *J* = 5.8 Hz), 117.5 (d, *J* = 2.6 Hz), 115.9 (d, *J* = 10.0 Hz), 113.7, 55.3 (d, *J* = 14.3 Hz), 20.2 (d, *J* = 73.9 Hz), 5.4 (d, *J* = 4.9 Hz).

**<sup>31</sup>P NMR** (202 MHz, Chloroform-*d*)  $\delta$  36.3.

**HRMS** (ESI) [M+Na]<sup>+</sup>: calcd. 365.1283, found. 365.1289.

**Optical Rotation:** [ $\alpha$ ]<sub>D</sub><sup>20</sup> = +84.0 (*c* = +1.45, acetone).

**HPLC:** Daicel Chiralcel AD-H (92 % ee), *n*-Hexanes/*i*-PrOH = 70/30, 1 mL/min,  $\lambda$  = 293 nm, *t* (major) = 7.4 min, *t* (minor) = 11.3 min.

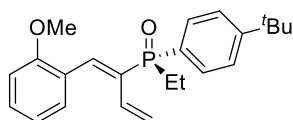

**3jb:** 87% yield, yellow oil.

**<sup>1</sup>H NMR** (500 MHz, Chloroform-*d*)  $\delta$  7.71 (dd, *J* = 11.1, 8.2 Hz, 2H), 7.55 – 7.46 (m, 3H), 7.39 (d, *J* = 7.4 Hz, 1H), 7.31 (td, *J* = 7.9, 1.7 Hz, 1H), 6.95 – 6.88 (m, 2H), 6.64 – 6.52 (m, 1H), 5.57 (dt, *J* = 18.1,

1.4 Hz, 1H), 5.28 – 5.22 (m, 1H), 3.83 (s, 3H), 2.33 – 2.15 (m, 2H), 1.33 (s, 9H), 1.23 (dt,  $J = 17.3, 7.4$  Hz, 3H).

$^{13}\text{C}$  NMR (126 MHz, Chloroform- $d$ )  $\delta$  157.7, 154.9 (d,  $J = 2.7$  Hz), 138.3 (d,  $J = 10.1$  Hz), 131.7, 131.6, 131.0 (d,  $J = 1.7$  Hz), 130.8 (d,  $J = 9.6$  Hz), 130.2, 129.6 (d,  $J = 99.1$  Hz), 125.5 (d,  $J = 11.8$  Hz), 124.5 (d,  $J = 16.3$  Hz), 120.5 (d,  $J = 5.2$  Hz), 120.0, 110.6, 55.5, 35.0, 31.2, 21.2 (d,  $J = 73.5$  Hz), 5.7 (d,  $J = 5.0$  Hz).

$^{31}\text{P}$  NMR (202 MHz, Chloroform- $d$ )  $\delta$  37.2.

HRMS (ESI)  $[\text{M}+\text{H}]^+$ : calcd. 369.1983, found. 369.1984.

Optical Rotation:  $[\alpha]_{\text{D}}^{20} = +29.7$  ( $c = 3.13$ , acetone).

HPLC: Daicel Chiralcel AD-H (89 % ee),  $n$ -Hexanes/ $i$ -PrOH = 80/20, 1 mL/min,  $\lambda = 315$  nm,  $t$  (major) = 5.9 min,  $t$  (minor) = 6.6 min.

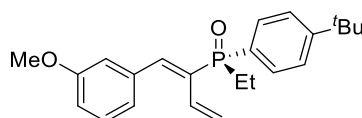

**3jc**: 96% yield, colorless oil.

$^1\text{H}$  NMR (500 MHz, Chloroform- $d$ )  $\delta$  7.68 (dd,  $J = 11.1, 8.1$  Hz, 2H), 7.49 (dd,  $J = 8.3, 2.5$  Hz, 2H), 7.45 (d,  $J = 19.4$  Hz, 1H), 7.31 – 7.26 (m, 1H), 7.07 (d,  $J = 7.7$  Hz, 1H), 7.03 (t,  $J = 1.9$  Hz, 1H), 6.88 (dd,  $J = 8.3, 2.5$  Hz, 1H), 6.67 – 6.56 (m, 1H), 5.35 (dd,  $J = 18.1, 2.0$  Hz, 1H), 5.33 – 5.28 (m, 1H), 3.80 (s, 3H), 2.24 (dq,  $J = 11.3, 7.6$  Hz, 2H), 1.33 (s, 9H), 1.23 (dt,  $J = 17.4, 7.4$  Hz, 3H).

$^{13}\text{C}$  NMR (126 MHz, Chloroform- $d$ )  $\delta$  159.4, 155.2 (d,  $J = 2.8$  Hz), 142.5 (d,  $J = 7.7$  Hz), 136.8 (d,  $J = 16.3$  Hz), 132.0 (d,  $J = 88.7$  Hz), 131.7 (d,  $J = 8.9$  Hz), 130.7 (d,  $J = 9.5$  Hz), 129.6 (d,  $J = 99.6$  Hz), 129.3, 125.7 (d,  $J = 11.8$  Hz), 122.6, 120.8 (d,  $J = 5.5$  Hz), 115.3, 114.6, 55.3, 35.0, 31.1, 20.3 (d,  $J = 73.9$  Hz), 5.5 (d,  $J = 4.8$  Hz).

$^{31}\text{P}$  NMR (202 MHz, Chloroform- $d$ )  $\delta$  35.6.

HRMS (ESI)  $[\text{M}+\text{H}]^+$ : calcd. 369.1983, found. 369.1989.

Optical Rotation:  $[\alpha]_{\text{D}}^{20} = +43.9$  ( $c = 0.673$ , acetone).

HPLC: Daicel Chiralcel AD-H (97 % ee),  $n$ -Hexanes/ $i$ -PrOH = 80/20, 1 mL/min,  $\lambda = 274$  nm,  $t$  (major) = 7.4 min,  $t$  (minor) = 8.8 min.

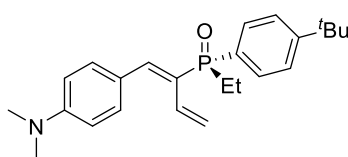

**3jd**: 42% yield, yellow oil.

$^1\text{H}$  NMR (500 MHz, Chloroform- $d$ )  $\delta$  7.68 (dd,  $J = 11.0, 8.1$  Hz, 2H), 7.50 – 7.42 (m, 4H), 7.36 (d,  $J = 19.5$  Hz, 1H), 6.75 – 6.60 (m, 3H), 5.27 (dt,  $J = 25.2, 1.5$  Hz, 1H), 5.28 – 5.25 (m, 1H), 3.00 (s, 6H), 2.28 – 2.17 (m, 2H), 1.32 (s, 9H), 1.20 (dt,  $J = 16.8, 7.6$  Hz, 3H).

$^{13}\text{C}$  NMR (126 MHz, Chloroform- $d$ )  $\delta$  154.7 (d,  $J = 2.6$  Hz), 150.5, 142.8 (d,  $J = 7.8$  Hz), 132.6 (d,  $J = 9.4$  Hz), 131.8, 130.7 (d,  $J = 9.6$  Hz), 130.3 (d,  $J = 99.2$  Hz), 125.6 (d,  $J = 93.0$  Hz), 125.4 (d,  $J = 11.6$  Hz), 123.6 (d,  $J = 16.8$  Hz), 119.2 (d,  $J = 5.7$  Hz), 111.4, 40.1, 34.9, 31.1, 20.1 (d,  $J = 74.0$  Hz), 5.5 (d,  $J = 4.8$  Hz).

$^{31}\text{P}$  NMR (202 MHz, Chloroform- $d$ )  $\delta$  36.3.

HRMS (ESI)  $[\text{M}+\text{H}]^+$ : calcd. 382.2300, found. 382.2296.

Optical Rotation:  $[\alpha]_{\text{D}}^{20} = +186$  ( $c = 1.19$ , acetone).

HPLC: Daicel Chiralcel OD-H (91 % ee),  $n$ -Hexanes/ $i$ -PrOH = 90/10, 1 mL/min,  $\lambda = 343$  nm,  $t$  (major)

= 9.7 min, *t* (minor) = 11.3 min.

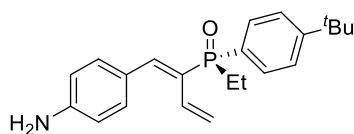

**3je:** 95% yield, brown oil.

**<sup>1</sup>H NMR** (500 MHz, Chloroform-*d*)  $\delta$  7.67 (dd, *J* = 11.0, 8.0 Hz, 2H), 7.50 – 7.43 (m, 2H), 7.38 – 7.31 (m, 3H),  $\delta$  6.72 – 6.55 (m, 1H), 6.64 (d, *J* = 8.6 Hz, 2H), 5.32 – 5.24 (m, 1H), 5.27 (s, 1H), 4.01 (s, 2H), 2.32 – 2.13 (m, 2H), 1.32 (s, 9H), 1.20 (dt, *J* = 15.9, 7.6 Hz, 3H).

**<sup>13</sup>C NMR** (126 MHz, Chloroform-*d*)  $\delta$  155.2 (d, *J* = 2.7 Hz), 141.0 (d, *J* = 7.7 Hz), 134.6, 133.9 (d, *J* = 16.4 Hz), 132.6 (d, *J* = 88.5 Hz), 131.3 (d, *J* = 9.0 Hz), 131.2, 130.6 (d, *J* = 9.5 Hz), 129.2 (d, *J* = 99.6 Hz), 128.5, 125.6 (d, *J* = 11.8 Hz), 121.3 (d, *J* = 5.9 Hz), 34.9, 31.1, 20.1 (d, *J* = 73.9 Hz), 5.4 (d, *J* = 5.1 Hz).

**<sup>31</sup>P NMR** (202 MHz, Chloroform-*d*)  $\delta$  36.1.

**HRMS** (ESI) [M+H]<sup>+</sup>: calcd. 354.1987, found. 354.1984.

**Optical Rotation:** [ $\alpha$ ]<sub>D</sub><sup>20</sup> = +102 (*c* = 1.69, acetone).

**HPLC:** Daicel Chiralcel AD-H (94 % ee), *n*-Hexanes/*i*-PrOH = 60/40, 1 mL/min,  $\lambda$  = 284 nm, *t* (major) = 5.6 min, *t* (minor) = 13.1 min.

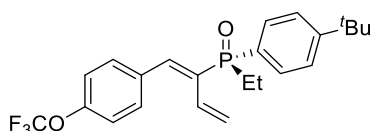

**3jf:** 91% yield, yellow oil.

**<sup>1</sup>H NMR** (500 MHz, Chloroform-*d*)  $\delta$  7.68 (dd, *J* = 11.0, 8.0 Hz, 2H), 7.55 – 7.47 (m, 4H), 7.45 (d, *J* = 19.2 Hz, 1H), 7.21 (d, *J* = 8.3 Hz, 2H), 6.54 (td, *J* = 17.0, 11.6 Hz, 1H), 5.36 (d, *J* = 7.5 Hz, 1H), 5.34 (d, *J* = 2.2 Hz, 1H), 2.24 (dq, *J* = 15.2, 7.8 Hz, 2H), 1.34 (s, 9H), 1.23 (dt, *J* = 16.3, 7.4 Hz, 3H).

**<sup>13</sup>C NMR** (126 MHz, Chloroform-*d*)  $\delta$  155.4 (d, *J* = 2.7 Hz), 140.7 (d, *J* = 7.7 Hz), 138.9 (d, *J* = 17.0 Hz), 134.6 (d, *J* = 87.1 Hz), 131.0 (d, *J* = 8.8 Hz), 130.7 (d, *J* = 9.6 Hz), 130.3 (d, *J* = 32.8 Hz), 130.1, 129.0 (d, *J* = 99.9 Hz), 125.7 (d, *J* = 11.8 Hz), 125.2 (q, *J* = 3.8 Hz), 123.8 (q, *J* = 272.3 Hz), 121.8 (d, *J* = 5.9 Hz), 35.0, 31.1, 20.1 (d, *J* = 73.9 Hz), 5.4 (d, *J* = 5.1 Hz).

**<sup>31</sup>P NMR** (202 MHz, Chloroform-*d*)  $\delta$  35.2.

**<sup>19</sup>F NMR** (471 MHz, Chloroform-*d*)  $\delta$  -57.8.

**HRMS** (ESI) [M+H]<sup>+</sup>: calcd. 423.1701, found. 423.1703.

**Optical Rotation:** [ $\alpha$ ]<sub>D</sub><sup>20</sup> = +46.1 (*c* = 1.10, acetone).

**HPLC:** Daicel Chiralcel AD-H (95 % ee), *n*-Hexanes/*i*-PrOH = 70/30, 1 mL/min,  $\lambda$  = 272 nm, *t* (major) = 4.8 min, *t* (minor) = 7.8 min.

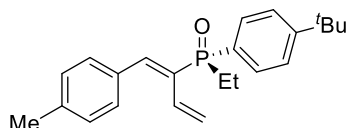

**3jg:** 78% yield, yellow oil.

**<sup>1</sup>H NMR** (500 MHz, Chloroform-*d*)  $\delta$  7.73 – 7.64 (m, 2H), 7.49 (dd, *J* = 8.3, 2.5 Hz, 2H), 7.44 (d, *J* = 19.5 Hz, 1H), 7.39 (d, *J* = 7.9 Hz, 2H), 7.17 (d, *J* = 7.8 Hz, 2H), 6.68 – 6.55 (m, 1H), 5.37 – 5.32 (m, 1H), 5.31 – 5.27 (m, 1H), 2.36 (s, 3H), 2.29 – 2.19 (m, 2H), 1.33 (s, 9H), 1.28 – 1.17 (m, 3H).



$^{13}\text{C}$  NMR (126 MHz, Chloroform-*d*)  $\delta$  155.0 (d,  $J = 2.7$  Hz), 142.6 (d,  $J = 7.8$  Hz), 138.9, 132.7 (d,  $J = 16.5$  Hz), 131.8 (d,  $J = 9.0$  Hz), 130.6 (d,  $J = 9.5$  Hz), 130.5 (d,  $J = 89.9$  Hz), 130.0, 129.2, 129.0, 125.5 (d,  $J = 11.7$  Hz), 120.4 (d,  $J = 5.7$  Hz), 34.9, 31.0, 21.3, 20.2 (d,  $J = 73.8$  Hz), 5.4 (d,  $J = 5.0$  Hz).

$^{31}\text{P}$  NMR (202 MHz, Chloroform-*d*)  $\delta$  35.9.

HRMS (ESI)  $[\text{M}+\text{H}]^+$ : calcd. 353.2034, found. 353.2030.

Optical Rotation:  $[\alpha]_{\text{D}}^{20} = +36.6$  ( $c = 1.35$ , acetone).

HPLC: Daicel Chiralcel OD-H (87 % ee), *n*-Hexanes/*i*-PrOH = 93/7, 1 mL/min,  $\lambda = 281$  nm,  $t$  (major) = 7.2 min,  $t$  (minor) = 8.7 min.

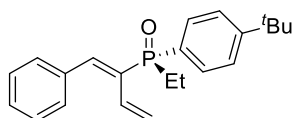

**3jh**: 95% yield, light yellow oil.

$^1\text{H}$  NMR (500 MHz, Chloroform-*d*)  $\delta$  7.73 – 7.65 (m, 2H), 7.53 – 7.43 (m, 5H), 7.35 (dt,  $J = 16.6$ , 7.1 Hz, 3H), 6.61 (td,  $J = 17.6$ , 11.7 Hz, 1H), 5.40 – 5.34 (m, 1H), 5.33 – 5.28 (m, 1H), 2.31 – 2.19 (m, 2H), 1.33 (s, 9H), 1.23 (dt,  $J = 17.0$ , 7.4 Hz, 3H).

$^{13}\text{C}$  NMR (126 MHz, Chloroform-*d*)  $\delta$  155.0 (d,  $J = 2.8$  Hz), 142.5 (d,  $J = 7.6$  Hz), 135.4 (d,  $J = 16.3$  Hz), 131.7 (d,  $J = 89.1$  Hz), 131.6 (d,  $J = 9.1$  Hz), 130.6 (d,  $J = 9.5$  Hz), 130.0, 129.5 (d,  $J = 99.5$  Hz), 128.6, 128.2, 125.6 (d,  $J = 11.8$  Hz), 120.7 (d,  $J = 5.6$  Hz), 34.9, 31.0, 20.2 (d,  $J = 73.9$  Hz), 5.4 (d,  $J = 5.0$  Hz).

$^{31}\text{P}$  NMR (202 MHz, Chloroform-*d*)  $\delta$  36.1.

HRMS (ESI)  $[\text{M}+\text{H}]^+$ : calcd. 339.1878, found. 339.1875.

Optical Rotation:  $[\alpha]_{\text{D}}^{20} = +61.2$  ( $c = 1.52$ , acetone).

HPLC: Daicel Chiralcel AD-H (94 % ee), *n*-Hexanes/*i*-PrOH = 80/20, 1 mL/min,  $\lambda = 273$  nm,  $t$  (major) = 7.5 min,  $t$  (minor) = 11.4 min.

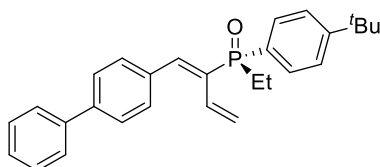

**3ji**: 70% yield, light yellow oil.

$^1\text{H}$  NMR (500 MHz, Chloroform-*d*)  $\delta$  7.74 – 7.67 (m, 2H), 7.63 – 7.55 (m, 6H), 7.54 – 7.48 (m, 3H), 7.45 (t,  $J = 7.7$  Hz, 2H), 7.39 – 7.33 (m, 1H), 6.66 (dddd,  $J = 18.1$ , 16.8, 11.6, 1.5 Hz, 1H), 5.38 (dt,  $J = 18.3$ , 1.8 Hz, 1H), 5.36 – 5.32 (m, 1H), 2.30 – 2.22 (m, 2H), 1.34 (s, 9H), 1.24 (dt,  $J = 17.3$ , 7.5 Hz, 3H).

$^{13}\text{C}$  NMR (126 MHz, Chloroform-*d*)  $\delta$  155.1 (d,  $J = 2.8$  Hz), 142.0 (d,  $J = 7.6$  Hz), 141.4, 140.2, 134.5 (d,  $J = 16.5$  Hz), 131.7 (d,  $J = 8.9$  Hz), 131.7 (d,  $J = 89.0$  Hz), 130.7, 130.6, 130.6, 129.6 (d,  $J = 99.4$  Hz), 128.8, 127.6, 126.9 (d,  $J = 10.6$  Hz), 125.6 (d,  $J = 11.7$  Hz), 120.8 (d,  $J = 5.8$  Hz), 34.9, 31.1, 20.2 (d,  $J = 73.9$  Hz), 5.5 (d,  $J = 5.0$  Hz).

$^{31}\text{P}$  NMR (202 MHz, Chloroform-*d*)  $\delta$  35.6.

HRMS (ESI)  $[\text{M}+\text{H}]^+$ : calcd. 415.2191, found. 415.2190.

Optical Rotation:  $[\alpha]_{\text{D}}^{20} = +27.9$  ( $c = 2.76$ , acetone).

HPLC: Daicel Chiralcel AD-H (94 % ee), *n*-Hexanes/*i*-PrOH = 60/40, 1 mL/min,  $\lambda = 303$  nm,  $t$  (major) = 5.8 min,  $t$  (minor) = 12.4 min.

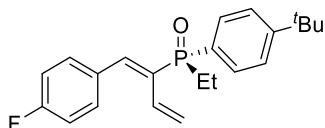

**3jj:** 83% yield, light yellow oil.

**<sup>1</sup>H NMR** (500 MHz, Chloroform-*d*)  $\delta$  7.72 – 7.64 (m, 2H), 7.54 – 7.38 (m, 5H), 7.08 – 7.01 (m, 2H), 6.55 (dddd,  $J = 17.9, 16.2, 11.7, 1.4$  Hz, 1H), 5.37 – 5.33 (m, 1H), 5.33 – 5.31 (m, 1H), 2.23 (dq,  $J = 11.2, 7.6$  Hz, 2H), 1.33 (s, 9H), 1.22 (dt,  $J = 17.4, 7.6$  Hz, 3H).

**<sup>13</sup>C NMR** (126 MHz, Chloroform-*d*)  $\delta$  162.7 (d,  $J = 249.9$  Hz), 155.2 (d,  $J = 2.7$  Hz), 141.3 (d,  $J = 7.6$  Hz), 131.9 (d,  $J = 8.0$  Hz), 131.6 (dd,  $J = 16.6, 3.3$  Hz), 131.5 (d,  $J = 9.0$  Hz), 131.2, 130.7 (d,  $J = 9.6$  Hz), 129.4 (d,  $J = 99.5$  Hz), 125.6 (d,  $J = 11.6$  Hz), 121.1 (d,  $J = 5.9$  Hz), 115.3 (d,  $J = 21.6$  Hz), 35.0, 31.1, 20.1 (d,  $J = 73.9$  Hz), 5.4 (d,  $J = 5.0$  Hz).

**<sup>31</sup>P NMR** (202 MHz, Chloroform-*d*)  $\delta$  35.5.

**<sup>19</sup>F NMR** (471 MHz, Chloroform-*d*)  $\delta$  -111.6.

**HRMS** (ESI)  $[M+H]^+$ : calcd. 357.1784, found. 357.1783.

**Optical Rotation:**  $[\alpha]_D^{20} = +53.4$  ( $c = 1.02$ , acetone).

**HPLC:** Daicel Chiralcel AD-H (95 % ee), *n*-Hexanes/*i*-PrOH = 60/40, 1 mL/min,  $\lambda = 273$  nm,  $t$  (major) = 4.6 min,  $t$  (minor) = 8.6 min.

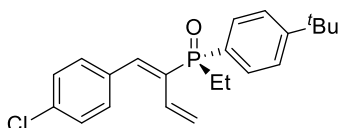

**3jk:** 76% yield, yellow powder.

**<sup>1</sup>H NMR** (500 MHz, Chloroform-*d*)  $\delta$  7.68 (dd,  $J = 11.1, 8.0$  Hz, 2H), 7.50 (dd,  $J = 8.3, 2.5$  Hz, 2H), 7.46 – 7.38 (m, 3H), 7.33 (d,  $J = 8.2$  Hz, 2H), 6.54 (td,  $J = 17.1, 11.5$  Hz, 1H), 5.38 – 5.32 (m, 1H), 5.32 (d,  $J = 3.2$  Hz, 1H), 2.23 (dq,  $J = 11.2, 7.6$  Hz, 2H), 1.33 (s, 9H), 1.22 (dt,  $J = 17.4, 7.5$  Hz, 3H).

**<sup>13</sup>C NMR** (126 MHz, Chloroform-*d*)  $\delta$  155.2 (d,  $J = 2.7$  Hz), 141.1 (d,  $J = 7.7$  Hz), 134.6, 133.9 (d,  $J = 16.4$  Hz), 132.6 (d,  $J = 88.3$  Hz), 131.4 (d,  $J = 9.1$  Hz), 131.2, 130.6 (d,  $J = 9.6$  Hz), 129.3 (d,  $J = 99.6$  Hz), 128.5, 125.6 (d,  $J = 11.7$  Hz), 121.3 (d,  $J = 5.8$  Hz), 35.0, 31.1, 20.1 (d,  $J = 73.9$  Hz), 5.4 (d,  $J = 4.9$  Hz).

**<sup>31</sup>P NMR** (202 MHz, Chloroform-*d*)  $\delta$  35.4.

**HRMS** (ESI)  $[M+H]^+$ : calcd. 373.1488 (<sup>37</sup>Cl), found. 373.1483.

**Optical Rotation:**  $[\alpha]_D^{20} = +46.4$  ( $c = 1.88$ , acetone).

**HPLC:** Daicel Chiralcel AD-H (96 % ee), *n*-Hexanes/*i*-PrOH = 60/40, 1 mL/min,  $\lambda = 279$  nm,  $t$  (major) = 4.9 min,  $t$  (minor) = 10.9 min.

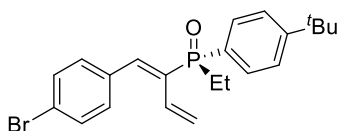

**3jl:** 90% yield, white powder.

**<sup>1</sup>H NMR** (500 MHz, Chloroform-*d*)  $\delta$  7.70 – 7.64 (m, 2H), 7.52 – 7.47 (m, 4H), 7.40 (d,  $J = 19.3$  Hz, 1H), 7.35 (d,  $J = 8.4$  Hz, 2H), 6.52 (dddd,  $J = 17.7, 16.1, 11.6, 1.4$  Hz, 1H), 5.37 – 5.32 (m, 1H), 5.35 – 5.31 (m, 1H), 2.23 (dq,  $J = 11.2, 7.6$  Hz, 2H), 1.33 (s, 9H), 1.22 (dt,  $J = 17.4, 7.7$  Hz, 3H).

$^{13}\text{C}$  NMR (126 MHz, Chloroform-*d*)  $\delta$  155.1, 138.9 (d,  $J = 18.7$  Hz), 134.7 (d,  $J = 8.7$  Hz), 132.2, 131.4 (d,  $J = 8.9$  Hz), 130.6 (d,  $J = 9.6$  Hz), 129.5 (d,  $J = 100.1$  Hz), 129.3, 128.3 (d,  $J = 91.3$  Hz), 127.1, 125.6 (d,  $J = 11.6$  Hz), 122.1 (d,  $J = 6.2$  Hz), 35.0, 31.1, 20.1 (d,  $J = 74.5$  Hz), 5.4 (d,  $J = 5.0$  Hz).

$^{31}\text{P}$  NMR (202 MHz, Chloroform-*d*)  $\delta$  35.2.

HRMS (ESI)  $[\text{M}+\text{H}]^+$ : calcd. 417.0983 ( $^{79}\text{Br}$ ), found. 417.0975.

Optical Rotation:  $[\alpha]_{\text{D}}^{20} = +64.2$  ( $c = 1.19$ , acetone).

HPLC: Daicel Chiralcel AD-H (95 % ee), *n*-Hexanes/*i*-PrOH = 60/40, 1 mL/min,  $\lambda = 280$  nm,  $t$  (major) = 5.1 min,  $t$  (minor) = 11.8 min.

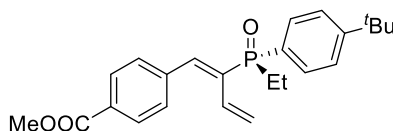

**3jm**: 88% yield, yellow oil.

$^1\text{H}$  NMR (500 MHz, Chloroform-*d*)  $\delta$  8.03 (d,  $J = 7.9$  Hz, 2H), 7.69 (t,  $J = 9.5$  Hz, 2H), 7.56 – 7.44 (m, 5H), 6.55 (td,  $J = 17.1, 11.7$  Hz, 1H), 5.37 (d,  $J = 30.3$  Hz, 1H), 5.36 (s, 1H), 3.92 (s, 3H), 2.25 (dq,  $J = 15.5, 8.0$  Hz, 2H), 1.34 (s, 9H), 1.24 (dt,  $J = 16.2, 7.3$  Hz, 3H).

$^{13}\text{C}$  NMR (126 MHz, Chloroform-*d*)  $\delta$  166.5, 155.3 (d,  $J = 2.7$  Hz), 141.2 (d,  $J = 7.6$  Hz), 139.9 (d,  $J = 16.2$  Hz), 134.4 (d,  $J = 87.2$  Hz), 131.2 (d,  $J = 8.8$  Hz), 130.7 (d,  $J = 9.5$  Hz), 129.8, 129.8, 129.4, 129.1 (d,  $J = 99.6$  Hz), 125.7 (d,  $J = 11.7$  Hz), 121.6 (d,  $J = 5.9$  Hz), 52.2, 35.0, 31.1, 20.2 (d,  $J = 73.8$  Hz), 5.4 (d,  $J = 5.0$  Hz).

$^{31}\text{P}$  NMR (202 MHz, Chloroform-*d*)  $\delta$  35.2.

HRMS (ESI)  $[\text{M}+\text{Na}]^+$ : calcd. 419.1752, found. 419.1749.

Optical Rotation:  $[\alpha]_{\text{D}}^{20} = +41.8$  ( $c = 1.18$ , acetone).

HPLC: Daicel Chiralcel AD-H (93 % ee), *n*-Hexanes/*i*-PrOH = 80/20, 1 mL/min,  $\lambda = 304$  nm,  $t$  (major) = 9.1 min,  $t$  (minor) = 16.6 min.

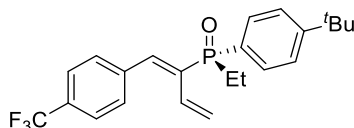

**3jn**: 75% yield, colorless oil.

$^1\text{H}$  NMR (500 MHz, Chloroform-*d*)  $\delta$  7.73 – 7.65 (m, 2H), 7.64 – 7.55 (m, 4H), 7.55 – 7.46 (m, 3H), 6.53 (dddd,  $J = 17.5, 15.8, 11.6, 1.4$  Hz, 1H), 5.40 – 5.36 (m, 1H), 5.34 (dd,  $J = 4.2, 2.0$  Hz, 1H), 2.25 (dq,  $J = 11.1, 7.6$  Hz, 2H), 1.34 (s, 9H), 1.24 (dt,  $J = 17.5, 7.6$  Hz, 3H).

$^{13}\text{C}$  NMR (126 MHz, Chloroform-*d*)  $\delta$  155.4 (d,  $J = 2.7$  Hz), 140.7 (d,  $J = 7.7$  Hz), 138.9 (d,  $J = 17.0$  Hz), 134.6 (d,  $J = 87.1$  Hz), 131.0 (d,  $J = 8.8$  Hz), 130.7 (d,  $J = 9.6$  Hz), 130.3 (d,  $J = 32.8$  Hz), 130.1, 129.0 (d,  $J = 99.9$  Hz), 125.7 (d,  $J = 11.8$  Hz), 125.2 (q,  $J = 3.8$  Hz), 123.9 (d,  $J = 272.2$  Hz), 121.8 (d,  $J = 5.9$  Hz), 35.0, 31.1, 20.1 (d,  $J = 73.9$  Hz), 5.4 (d,  $J = 5.1$  Hz).

$^{31}\text{P}$  NMR (202 MHz, Chloroform-*d*)  $\delta$  35.0.

$^{19}\text{F}$  NMR (471 MHz, Chloroform-*d*)  $\delta$  -62.8.

HRMS (ESI)  $[\text{M}+\text{H}]^+$ : calcd. 407.1752, found. 407.1749.

Optical Rotation:  $[\alpha]_{\text{D}}^{20} = +38.2$  ( $c = 1.07$ , acetone).

HPLC: Daicel Chiralcel AD-H (94 % ee), *n*-Hexanes/*i*-PrOH = 80/20, 1 mL/min,  $\lambda = 288$  nm,  $t$  (major) = 6.6 min,  $t$  (minor) = 13.4 min.

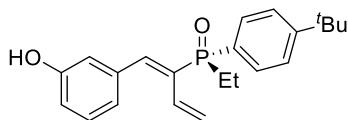

**3jo:** 45% yield, white powder.

**<sup>1</sup>H NMR** (500 MHz, Chloroform-*d*)  $\delta$  10.19 (s, 1H),  $\delta$  7.67 (dd,  $J = 11.2, 8.0$  Hz, 2H), 7.56 (d,  $J = 19.7$  Hz, 1H), 7.49 (d,  $J = 6.9$  Hz, 2H), 7.31 (s, 1H), 7.19 (t,  $J = 7.9$  Hz, 1H), 6.99 (d,  $J = 7.6$  Hz, 1H), 6.85 (d,  $J = 7.7$  Hz, 1H), 6.70 (td,  $J = 18.1, 11.6$  Hz, 1H), 5.32 – 5.28 (m, 1H), 5.26 (d,  $J = 3.5$  Hz, 1H), 2.27 (dq,  $J = 11.0, 7.7$  Hz, 2H), 1.32 (s, 9H), 1.28 – 1.15 (m, 3H).

**<sup>13</sup>C NMR** (126 MHz, Chloroform-*d*)  $\delta$  158.0, 155.4 (d,  $J = 2.7$  Hz), 144.2 (d,  $J = 7.1$  Hz), 136.1 (d,  $J = 16.4$  Hz), 131.8 (d,  $J = 9.7$  Hz), 130.7 (d,  $J = 9.8$  Hz), 129.6 (d,  $J = 91.3$  Hz), 129.2, 128.7 (d,  $J = 100.6$  Hz), 125.8 (d,  $J = 11.9$  Hz), 120.4 (d,  $J = 5.5$  Hz), 120.4, 117.7, 116.9, 35.0, 31.1, 19.9 (d,  $J = 73.7$  Hz), 5.4 (d,  $J = 5.0$  Hz).

**<sup>31</sup>P NMR** (202 MHz, Chloroform-*d*)  $\delta$  38.1.

**HRMS** (ESI)  $[M+Na]^+$ : calcd. 377.1646, found. 377.1635.

**Optical Rotation:**  $[\alpha]_D^{20} = +61.6$  ( $c = 0.680$ , acetone).

**HPLC:** Daicel Chiralcel OD-H (96 % ee), *n*-Hexanes/*i*-PrOH = 93/7, 1 mL/min,  $\lambda = 280$  nm,  $t$  (major) = 9.4 min,  $t$  (minor) = 11.8 min.

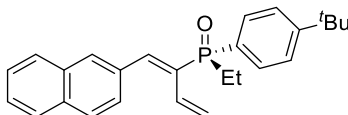

**3jp:** 73% yield, white powder.

**<sup>1</sup>H NMR** (500 MHz, Chloroform-*d*)  $\delta$  7.94 (s, 1H), 7.86 – 7.79 (m, 3H), 7.73 (dd,  $J = 11.1, 8.1$  Hz, 2H), 7.67 – 7.58 (m, 2H), 7.50 (ddd,  $J = 10.1, 6.5, 2.1$  Hz, 4H), 6.75 – 6.62 (m, 1H), 5.41 (dt,  $J = 18.0, 1.6$  Hz, 1H), 5.38 – 5.32 (m, 1H), 2.32 – 2.21 (m, 2H), 1.34 (s, 9H), 1.31 – 1.19 (m, 3H).

**<sup>13</sup>C NMR** (126 MHz, Chloroform-*d*)  $\delta$  155.1 (d,  $J = 2.7$  Hz), 142.6 (d,  $J = 7.8$  Hz), 133.1, 132.9, 132.6 (d,  $J = 83.6$  Hz), 131.7 (d,  $J = 9.0$  Hz), 131.6, 130.7 (d,  $J = 9.6$  Hz), 130.0, 129.5 (d,  $J = 99.6$  Hz), 129.5 (d,  $J = 136.8$  Hz), 128.3, 127.7 (d,  $J = 23.7$  Hz), 127.1, 126.8, 126.4, 125.6 (d,  $J = 11.7$  Hz), 121.0 (d,  $J = 5.7$  Hz), 34.9, 31.1, 20.3 (d,  $J = 73.7$  Hz), 5.5 (d,  $J = 5.0$  Hz).

**<sup>31</sup>P NMR** (202 MHz, Chloroform-*d*)  $\delta$  35.7.

**HRMS** (ESI)  $[M+H]^+$ : calcd. 389.2034, found. 389.2031.

**Optical Rotation:**  $[\alpha]_D^{20} = +48.6$  ( $c = 2.40$ , acetone).

**HPLC:** Daicel Chiralcel AD-H (95 % ee), *n*-Hexanes/*i*-PrOH = 80/20, 1 mL/min,  $\lambda = 265$  nm,  $t$  (major) = 8.2 min,  $t$  (minor) = 12.0 min.

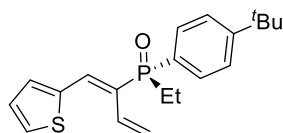

**3jq:** 24% yield, light yellow oil.

**<sup>1</sup>H NMR** (500 MHz, Chloroform-*d*)  $\delta$  7.76 – 7.59 (m, 3H), 7.48 (dd,  $J = 8.4, 2.6$  Hz, 2H), 7.42 (d,  $J = 5.1$  Hz, 1H), 7.30 (d,  $J = 3.6$  Hz, 1H), 7.07 (dd,  $J = 5.1, 3.7$  Hz, 1H), 6.68 (dddd,  $J = 17.8, 14.4, 11.5, 1.5$  Hz, 1H), 5.46 – 5.40 (m, 1H), 5.32 (ddd,  $J = 17.7, 2.6, 1.3$  Hz, 1H), 2.22 (dq,  $J = 10.4, 7.5, 3.6$  Hz, 2H), 1.33 (s, 9H), 1.22 (dt,  $J = 17.3, 7.6$  Hz, 3H).

**<sup>13</sup>C NMR** (126 MHz, Chloroform-*d*)  $\delta$  155.1 (d,  $J = 2.8$  Hz), 138.9 (d,  $J = 18.7$  Hz), 134.7 (d,  $J = 8.7$  Hz), 132.2, 131.4 (d,  $J = 8.9$  Hz), 130.6 (d,  $J = 9.6$  Hz), 129.5 (d,  $J = 100.2$  Hz), 129.3, 128.3 (d,  $J = 91.2$  Hz).

Hz), 127.1, 125.6 (d,  $J = 11.6$  Hz), 122.1 (d,  $J = 6.2$  Hz), 35.0, 31.1, 20.1 (d,  $J = 74.5$  Hz), 5.4 (d,  $J = 5.1$  Hz).

**$^{31}\text{P}$  NMR** (202 MHz, Chloroform- $d$ )  $\delta$  34.9.

**HRMS** (ESI)  $[\text{M}+\text{H}]^+$ : calcd. 345.1442, found. 345.1440.

**Optical Rotation:**  $[\alpha]_{\text{D}}^{20} = +8.00$  ( $c = 2.95$ , acetone).

**HPLC:** Daicel Chiralcel AD-H (95 % ee),  $n$ -Hexanes/ $i$ -PrOH = 80/20, 1 mL/min,  $\lambda = 305$  nm,  $t$  (major) = 7.7 min,  $t$  (minor) = 14.7 min.

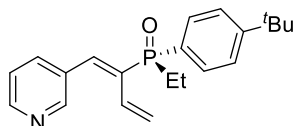

**3jr:** 76% yield, yellow oil.

**$^1\text{H}$  NMR** (500 MHz, Chloroform- $d$ )  $\delta$  8.64 (d,  $J = 2.3$  Hz, 1H), 8.50 – 8.43 (m, 1H), 7.78 – 7.70 (m, 1H), 7.61 (dd,  $J = 11.1, 8.1$  Hz, 2H), 7.44 (dd,  $J = 8.3, 2.6$  Hz, 2H), 7.38 (d,  $J = 19.1$  Hz, 1H), 7.26 – 7.20 (m, 1H), 6.46 (ddd,  $J = 17.9, 15.1, 11.2$  Hz, 1H), 5.34 – 5.30 (m, 1H), 5.30 – 5.26 (m, 1H), 2.17 (dq,  $J = 11.0, 7.6$  Hz, 2H), 1.26 (s, 9H), 1.16 (dt,  $J = 17.2, 7.6$  Hz, 3H).

**$^{31}\text{P}$  NMR** (202 MHz, Chloroform- $d$ )  $\delta$  34.9.

**$^{13}\text{C}$  NMR** (126 MHz, Chloroform- $d$ )  $\delta$  155.3 (d,  $J = 2.7$  Hz), 150.7, 149.3, 138.6 (d,  $J = 7.7$  Hz), 136.8, 134.7 (d,  $J = 87.1$  Hz), 131.3 (d,  $J = 16.1$  Hz), 130.9 (d,  $J = 8.9$  Hz), 130.6 (d,  $J = 9.6$  Hz), 128.8 (d,  $J = 99.9$  Hz), 125.7 (d,  $J = 11.8$  Hz), 123.1, 121.9 (d,  $J = 5.9$  Hz), 34.9, 31.0, 20.0 (d,  $J = 74.0$  Hz), 5.4 (d,  $J = 5.1$  Hz).

**HRMS** (ESI)  $[\text{M}+\text{Na}]^+$ : calcd. 362.1650, found. 362.1646.

**Optical Rotation:**  $[\alpha]_{\text{D}}^{20} = +30.8$  ( $c = 0.860$ , acetone).

**HPLC:** Daicel Chiralcel AD-H (92 % ee),  $n$ -Hexanes/ $i$ -PrOH = 70/30, 1 mL/min,  $\lambda = 261$  nm,  $t$  (major) = 6.8 min,  $t$  (minor) = 11.4 min.

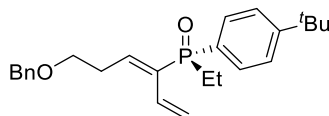

**3js:** 59% yield, colorless oil.

**$^1\text{H}$  NMR** (500 MHz, Chloroform- $d$ )  $\delta$  7.60 (dd,  $J = 10.9, 8.0$  Hz, 2H), 7.43 (dd,  $J = 8.3, 2.5$  Hz, 2H), 7.31 (m, 5H), 6.60 (dt,  $J = 19.4, 7.2$  Hz, 1H), 6.32 (dt,  $J = 17.7, 12.3$  Hz, 1H), 5.33 (d,  $J = 10.5$  Hz, 1H), 5.31 – 5.28 (m, 1H), 4.51 (s, 2H), 3.60 (t,  $J = 6.6$  Hz, 2H), 2.66 (dd,  $J = 6.8, 2.8$  Hz, 2H), 2.08 (dt,  $J = 15.1, 7.7$  Hz, 2H), 1.31 (s, 9H), 1.22 – 1.11 (m, 3H).

**$^{13}\text{C}$  NMR** (126 MHz, Chloroform- $d$ )  $\delta$  154.8 (d,  $J = 2.8$  Hz), 142.8 (d,  $J = 7.0$  Hz), 138.1, 133.4 (d,  $J = 91.3$  Hz), 130.5 (d,  $J = 9.5$  Hz), 130.0 (d,  $J = 10.7$  Hz), 129.1 (d,  $J = 99.2$  Hz), 128.3, 127.5 (d,  $J = 1.8$  Hz), 125.4 (d,  $J = 11.5$  Hz), 125.1, 120.9 (d,  $J = 7.2$  Hz), 73.0, 68.8, 34.9, 31.0, 29.9 (d,  $J = 13.0$  Hz), 20.7 (d,  $J = 73.4$  Hz), 5.3 (d,  $J = 5.0$  Hz).

**$^{31}\text{P}$  NMR** (202 MHz, Chloroform- $d$ )  $\delta$  34.3.

**HRMS** (ESI)  $[\text{M}+\text{H}]^+$ : calcd. 397.2296, found. 397.2298.

**Optical Rotation:**  $[\alpha]_{\text{D}}^{20} = +22.2$  ( $c = 1.56$ , acetone).

**HPLC:** Daicel Chiralcel AD-H (>99 % ee),  $n$ -Hexanes/ $i$ -PrOH = 93/7, 0.5 mL/min,  $\lambda = 228$  nm,  $t$  (major) = 40.9 min,  $t$  (minor) = 34.6 min.

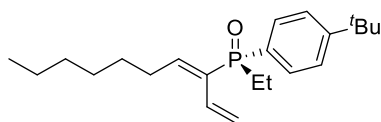

**3jt:** 90% yield, colorless oil.

**<sup>1</sup>H NMR** (500 MHz, Chloroform-*d*)  $\delta$  7.66 – 7.56 (m, 2H), 7.47 (dd,  $J = 8.4, 2.5$  Hz, 2H), 6.58 (dt,  $J = 19.5, 7.4$  Hz, 1H), 6.34 (ddd,  $J = 17.8, 14.0, 11.5$  Hz, 1H), 5.28 – 5.26 (m, 1H), 5.30 – 5.22 (m, 1H), 2.33 (qd,  $J = 7.5, 2.8$  Hz, 2H), 2.10 (dddd,  $J = 15.0, 9.2, 7.5, 2.3$  Hz, 2H), 1.47 (p,  $J = 7.2$  Hz, 2H), 1.36 – 1.24 (m, 6H), 1.32 (s, 9H), 1.16 (dt,  $J = 17.2, 7.6$  Hz, 3H), 0.88 (t,  $J = 6.7$  Hz, 3H).

**<sup>13</sup>C NMR** (126 MHz, Chloroform-*d*)  $\delta$  154.8 (d,  $J = 2.7$  Hz), 147.3 (d,  $J = 6.0$  Hz), 131.3 (d,  $J = 91.8$  Hz), 130.5 (d,  $J = 9.6$  Hz), 130.2 (d,  $J = 11.1$  Hz), 129.5 (d,  $J = 98.8$  Hz), 125.4 (d,  $J = 11.5$  Hz), 120.3 (d,  $J = 7.2$  Hz), 34.9, 31.5, 31.1, 29.2 (d,  $J = 12.8$  Hz), 29.0, 28.8 (d,  $J = 1.6$  Hz), 22.5, 20.7 (d,  $J = 73.4$  Hz), 14.0, 5.4 (d,  $J = 5.0$  Hz).

**<sup>31</sup>P NMR** (202 MHz, Chloroform-*d*)  $\delta$  34.3.

**HRMS** (ESI)  $[M+H]^+$ : calcd. 347.2504, found. 347.2504.

**Optical Rotation:**  $[\alpha]_D^{20} = -5.39$  ( $c = 1.32$ , acetone).

**HPLC:** Daicel Chiralcel IA-H (99 % ee), *n*-Hexanes/*i*-PrOH = 90/10, 0.5 mL/min,  $\lambda = 256$  nm,  $t$  (major) = 14.9 min,  $t$  (minor) = 16.6 min.

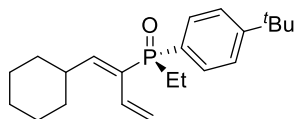

**3ju:** 61% yield, colorless oil.

**<sup>1</sup>H NMR** (500 MHz, Chloroform-*d*)  $\delta$  7.61 (dd,  $J = 10.9, 8.0$  Hz, 2H), 7.46 (dd,  $J = 8.3, 2.3$  Hz, 2H), 6.55 – 6.24 (m, 2H), 5.26 (s, 1H), 5.24 – 5.21 (m, 1H), 2.58 (q,  $J = 10.8$  Hz, 1H), 2.16 – 2.05 (m, 2H), 1.82 – 1.60 (m, 6H), 1.32 (s, 9H), 1.30 – 1.20 (m, 4H), 1.22 – 1.10 (m, 3H).

**<sup>13</sup>C NMR** (126 MHz, Chloroform-*d*)  $\delta$  154.8 (d,  $J = 2.5$  Hz), 152.1 (d,  $J = 5.4$  Hz), 130.5 (d,  $J = 9.6$  Hz), 130.3 (d,  $J = 11.0$  Hz), 129.7 (d,  $J = 52.3$  Hz), 129.0 (d,  $J = 45.1$  Hz), 125.4 (d,  $J = 11.6$  Hz), 120.0 (d,  $J = 7.0$  Hz), 38.1 (d,  $J = 12.2$  Hz), 34.9, 32.3 (d,  $J = 21.1$  Hz), 31.0, 25.7, 25.4, 20.6 (d,  $J = 73.4$  Hz), 5.4 (d,  $J = 5.0$  Hz).

**<sup>31</sup>P NMR** (202 MHz, Chloroform-*d*)  $\delta$  34.3.

**HRMS** (ESI)  $[M+Na]^+$ : calcd. 367.2167, found. 367.2162.

**Optical Rotation:**  $[\alpha]_D^{20} = +7.41$  ( $c = 0.870$ , acetone).

**HPLC:** Daicel Chiralcel AD-H (97 % ee), *n*-Hexanes/*i*-PrOH = 95/5, 1 mL/min,  $\lambda = 235$  nm,  $t$  (major) = 16.4 min,  $t$  (minor) = 19.0 min.

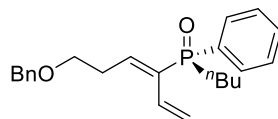

**3jv:** 92% yield, colorless oil.

**<sup>1</sup>H NMR** (500 MHz, Chloroform-*d*)  $\delta$  7.75 – 7.61 (m, 2H), 7.55 – 7.46 (m, 1H), 7.44 (td,  $J = 7.6, 2.6$  Hz, 2H), 7.37 – 7.24 (m, 5H), 6.62 (dt,  $J = 19.6, 7.2$  Hz, 1H), 6.32 (ddd,  $J = 17.6, 13.5, 11.6$  Hz, 1H), 5.32 (d,  $J = 2.5$  Hz, 1H), 5.30 – 5.27 (m, 1H), 4.51 (s, 2H), 3.60 (t,  $J = 6.6$  Hz, 2H), 2.66 (qd,  $J = 6.7, 2.8$  Hz, 2H), 2.12 (td,  $J = 10.9, 6.6$  Hz, 2H), 1.56 (dt,  $J = 14.3, 7.4$  Hz, 2H), 1.41 (h,  $J = 7.3$  Hz, 2H), 0.89 (t,  $J = 7.3$  Hz, 3H).

**<sup>13</sup>C NMR** (126 MHz, Chloroform-*d*)  $\delta$  143.3 (d,  $J = 7.0$  Hz), 138.0, 133.1 (d,  $J = 91.5$  Hz), 132.2 (d,  $J = 97.1$  Hz), 131.6 (d,  $J = 2.7$  Hz), 130.6 (d,  $J = 9.4$  Hz), 129.7 (d,  $J = 10.7$  Hz), 128.5 (d,  $J = 11.5$  Hz),

128.3, 127.5, 127.5, 121.1 (d,  $J = 7.3$  Hz), 72.9, 68.6 (d,  $J = 1.6$  Hz), 29.9 (d,  $J = 13.1$  Hz), 27.2 (d,  $J = 72.1$  Hz), 24.0 (d,  $J = 15.2$  Hz), 23.2 (d,  $J = 3.9$  Hz), 13.5.

$^{31}\text{P}$  NMR (202 MHz, Chloroform-*d*)  $\delta$  34.4.

HRMS (ESI)  $[\text{M}+\text{Na}]^+$ : calcd.391.1803, found. 391.1806.

**Optical Rotation:**  $[\alpha]_{\text{D}}^{20} = +12.7$  ( $c = 1.79$ , acetone).

**HPLC:** Daicel Chiralcel AD-H (92 % ee), *n*-Hexanes/*i*-PrOH = 80/20, 1 mL/min,  $\lambda = 208$  nm,  $t$  (major) = 8.0 min,  $t$  (minor) = 12.4 min.

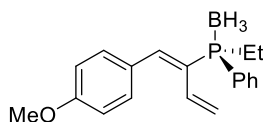

**4:** 60% yield, colorless oil.

$^1\text{H}$  NMR (500 MHz, Chloroform-*d*)  $\delta$  7.65 (ddd,  $J = 10.0, 7.6, 1.9$  Hz, 2H), 7.48 – 7.42 (m, 5H), 7.39 (d,  $J = 20.1$  Hz, 1H), 6.90 (d,  $J = 8.7$  Hz, 2H), 6.55 (dt,  $J = 18.0, 11.8$  Hz, 1H), 5.23 (d,  $J = 11.5$  Hz, 1H), 5.10 (d,  $J = 18.0$  Hz, 1H), 3.84 (s, 3H), 2.32 – 2.20 (m, 1H), 2.13 (dq,  $J = 14.3, 7.9$  Hz, 1H), 1.16 (dt,  $J = 17.8, 7.6$  Hz, 3H), 1.06 – 0.75 (m, 3H).

$^{13}\text{C}$  NMR (126 MHz, Chloroform-*d*)  $\delta$  160.0, 144.7 (d,  $J = 16.8$  Hz), 131.8, 131.4 (d,  $J = 8.6$  Hz), 130.6 (d,  $J = 2.3$  Hz), 130.3 (d,  $J = 54.7$  Hz), 129.4 (d,  $J = 89.7$  Hz), 128.7 (d,  $J = 9.7$  Hz), 128.4 (d,  $J = 17.1$  Hz), 125.2 (d,  $J = 48.2$  Hz), 119.9 (d,  $J = 4.9$  Hz), 113.7, 55.3, 16.1 (d,  $J = 38.7$  Hz), 6.9.

$^{31}\text{P}$  NMR (202 MHz, Chloroform-*d*)  $\delta$  24.36 (q,  $J = 58.2$  Hz).

HRMS(ESI)  $[\text{M}+\text{H}]^+$ : calcd. 311.1736, found. 311.1729.

**Optical Rotation:**  $[\alpha]_{\text{D}}^{20} = +34.9$  ( $c = 1.51$ , acetone).

**HPLC:** Daicel Chiralcel AD-H (88 % ee), *n*-Hexanes/*i*-PrOH = 90/10, 1 mL/min,  $\lambda = 297$  nm,  $t$  (major) = 6.7 min,  $t$  (minor) = 8.5 min.

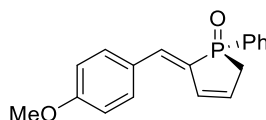

**5:** 92% yield, yellow oil.

$^1\text{H}$  NMR (500 MHz, Chloroform-*d*)  $\delta$  7.83 – 7.72 (m, 2H), 7.54 (td,  $J = 7.2, 1.5$  Hz, 1H), 7.47 (td,  $J = 7.5, 2.3$  Hz, 2H), 7.38 (d,  $J = 8.6$  Hz, 2H), 7.34 – 7.23 (m, 1H), 6.90 (d,  $J = 8.8$  Hz, 2H), 6.79 (d,  $J = 18.7$  Hz, 1H), 6.31 (dddd,  $J = 24.9, 6.3, 3.4, 1.6$  Hz, 1H), 3.82 (s, 3H), 2.95 (ddt,  $J = 18.4, 15.4, 2.8$  Hz, 1H), 2.77 (dddd,  $J = 19.3, 6.2, 3.4, 2.2$  Hz, 1H).

$^{13}\text{C}$  NMR (126 MHz, Chloroform-*d*)  $\delta$  159.9, 134.6 (d,  $J = 9.6$  Hz), 133.9 (d,  $J = 75.7$  Hz), 133.1 (d,  $J = 75.3$  Hz), 131.9 (d,  $J = 3.0$  Hz), 131.7 (d,  $J = 31.3$  Hz), 131.2 (d,  $J = 8.1$  Hz), 130.6, 130.2 (d,  $J = 10.2$  Hz), 129.2 (d,  $J = 17.5$  Hz), 128.6 (d,  $J = 12.0$  Hz), 114.0, 55.3, 33.0 (d,  $J = 70.5$  Hz).

$^{31}\text{P}$  NMR (202 MHz, Chloroform-*d*)  $\delta$  45.4.

HRMS (ESI)  $[\text{M}+\text{H}]^+$ : calcd. 297.1044, found.297.1045.

**Optical Rotation:**  $[\alpha]_{\text{D}}^{20} = +39.8$  ( $c = 1.40$ , acetone).

**HPLC:** Daicel Chiralcel OJ-H (88 % ee), *n*-Hexanes/*i*-PrOH = 90/10, 1 mL/min,  $\lambda = 315$  nm,  $t$  (major) = 19.4 min,  $t$  (minor) = 25.0 min.

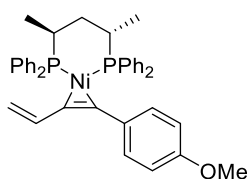

**A:**  $^1\text{H NMR}$  (500 MHz, Benzene- $d_6$ )  $\delta$  7.87 – 7.68 (m, 4H), 7.51 (t,  $J = 8.6$  Hz, 2H), 7.49 – 7.41 (m, 2H), 7.08 (d,  $J = 8.2$  Hz, 2H), 6.96 (t,  $J = 7.4$  Hz, 2H), 6.85 – 6.75 (m, 7H), 6.70 (d,  $J = 8.1$  Hz, 3H), 6.63 (dt,  $J = 10.5, 6.0$  Hz, 1H), 6.27 (d,  $J = 8.2$  Hz, 2H), 5.09 (d,  $J = 17.1$  Hz, 1H), 4.73 (d,  $J = 9.5$  Hz, 1H), 2.94 (s, 3H), 2.42 – 2.18 (m, 2H), 1.62 – 1.38 (m, 2H), 0.69 – 0.55 (m, 6H).

$^{31}\text{P NMR}$  (202 MHz, Benzene- $d_6$ )  $\delta$  35.6 (d,  $J = 20.2$  Hz), 34.6 (d,  $J = 20.1$  Hz).

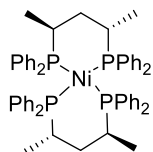

**B:**  $^1\text{H NMR}$  (400 MHz, Benzene- $d_6$ )  $\delta$  7.66 (s, 7H), 7.22 (s, 8H), 7.10 (dd,  $J = 12.3, 7.0$  Hz, 12H), 6.94 (t,  $J = 7.3$  Hz, 5H), 6.77 (t,  $J = 7.5$  Hz, 8H), 2.38 (q,  $J = 6.5$  Hz, 4H), 1.75 (d,  $J = 13.5$  Hz, 4H), 0.92 (dt,  $J = 11.3, 5.3$  Hz, 12H).

$^{31}\text{P NMR}$  (162 MHz, Benzene- $d_6$ )  $\delta$  28.0.

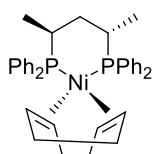

**C:**  $^1\text{H NMR}$  (400 MHz, Benzene- $d_6$ )  $\delta$  7.71 – 7.55 (m, 4H), 7.41 (t,  $J = 7.4$  Hz, 4H), 7.13 (d,  $J = 11.5$  Hz, 4H), 7.10 – 7.03 (m, 8H), 4.61 – 4.35 (m, 4H), 2.75 – 2.64 (m, 2H), 2.34 – 2.26 (m, 2H), 2.07 (s, 2H), 1.93 – 1.82 (m, 2H), 1.79 – 1.71 (m, 2H), 1.61 – 1.46 (m, 2H), 0.95 (dd,  $J = 10.5, 6.8$  Hz, 6H).

$^{31}\text{P NMR}$  (162 MHz, Benzene- $d_6$ )  $\delta$  34.4.



## 10. Supplementary References:

1. Y. Zhang, B. Yu, B. Gao, T. Zhang and H. Huang, *Org. Lett.*, 2019, **21**, 535.
2. R. Beaud, R. J. Phipps and M. J. Gaunt, *J. Am. Chem. Soc.*, 2016, **138**, 13183.
3. L. Duan, K. Zhao, Z. Wang, F.-L. Zhang and Z. Gu, *ACS Catal.*, 2019, **9**, 9852.
4. K. V. Rajendran and D. G. Gilheany, *Chem. Commun.*, 2012, **48**, 817.
5. Gaussian 16, Revision C.01, M. J. Frisch, G. W. Trucks, H. B. Schlegel, G. E. Scuseria, M. A. Robb, J. R. Cheeseman, G. Scalmani, V. Barone, G. A. Petersson, H. Nakatsuji, X. Li, M. Caricato, A. V. Marenich, J. Bloino, B. G. Janesko, R. Gomperts, B. Mennucci, H. P. Hratchian, J. V. Ortiz, A. F. Izmaylov, J. L. Sonnenberg, D. Williams-Young, F. Ding, F. Lipparini, F. Egidi, J. Goings, B. Peng, A. Petrone, T. Henderson, D. Ranasinghe, V. G. Zakrzewski, J. Gao, N. Rega, G. Zheng, W. Liang, M. Hada, M. Ehara, K. Toyota, R. Fukuda, J. Hasegawa, M. Ishida, T. Nakajima, Y. Honda, O. Kitao, H. Nakai, T. Vreven, K. Throssell, J. A., Jr. Montgomery, J. E. Peralta, F. Ogliaro, M. J. Bearpark, J. J. Heyd, E. N. Brothers, K. N. Kudin, V. N. Staroverov, T. A. Keith, R. Kobayashi, J. Normand, K. Raghavachari, A. P. Rendell, J. C. Burant, S. S. Iyengar, J. Tomasi, M. Cossi, J. M. Millam, M. Klene, C. Adamo, R. Cammi, J. W. Ochterski, R. L. Martin, K. Morokuma, O. Farkas, J. B. Foresman, and D. J. Fox, Gaussian, Inc., Wallingford CT, **2016**.
6. S. Grimme, *J. Chem. Theory Comput.*, 2019, **15**, 2847.
7. P. Pracht, F. Bohle and S. Grimme, *Phys. Chem. Chem. Phys.*, 2020, **22**, 7169.
8. P. Pracht and S. Grimme, *Chem. Sci.*, 2021, **12**, 6551.
9. G. Luchini, J. V. Alegre-Requena, Y. Guan, I. Funes-Ardoiz, R. S. Paton, 2019, GoodVibes: GoodVibes 3.0.1 <http://doi.org/10.5281/zenodo.595246>.
10. S. Grimme, *Chem. Eur. J.*, 2012, **18**, 9955.

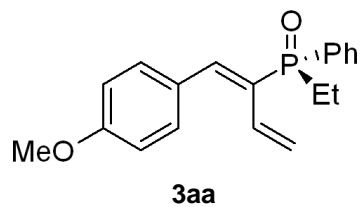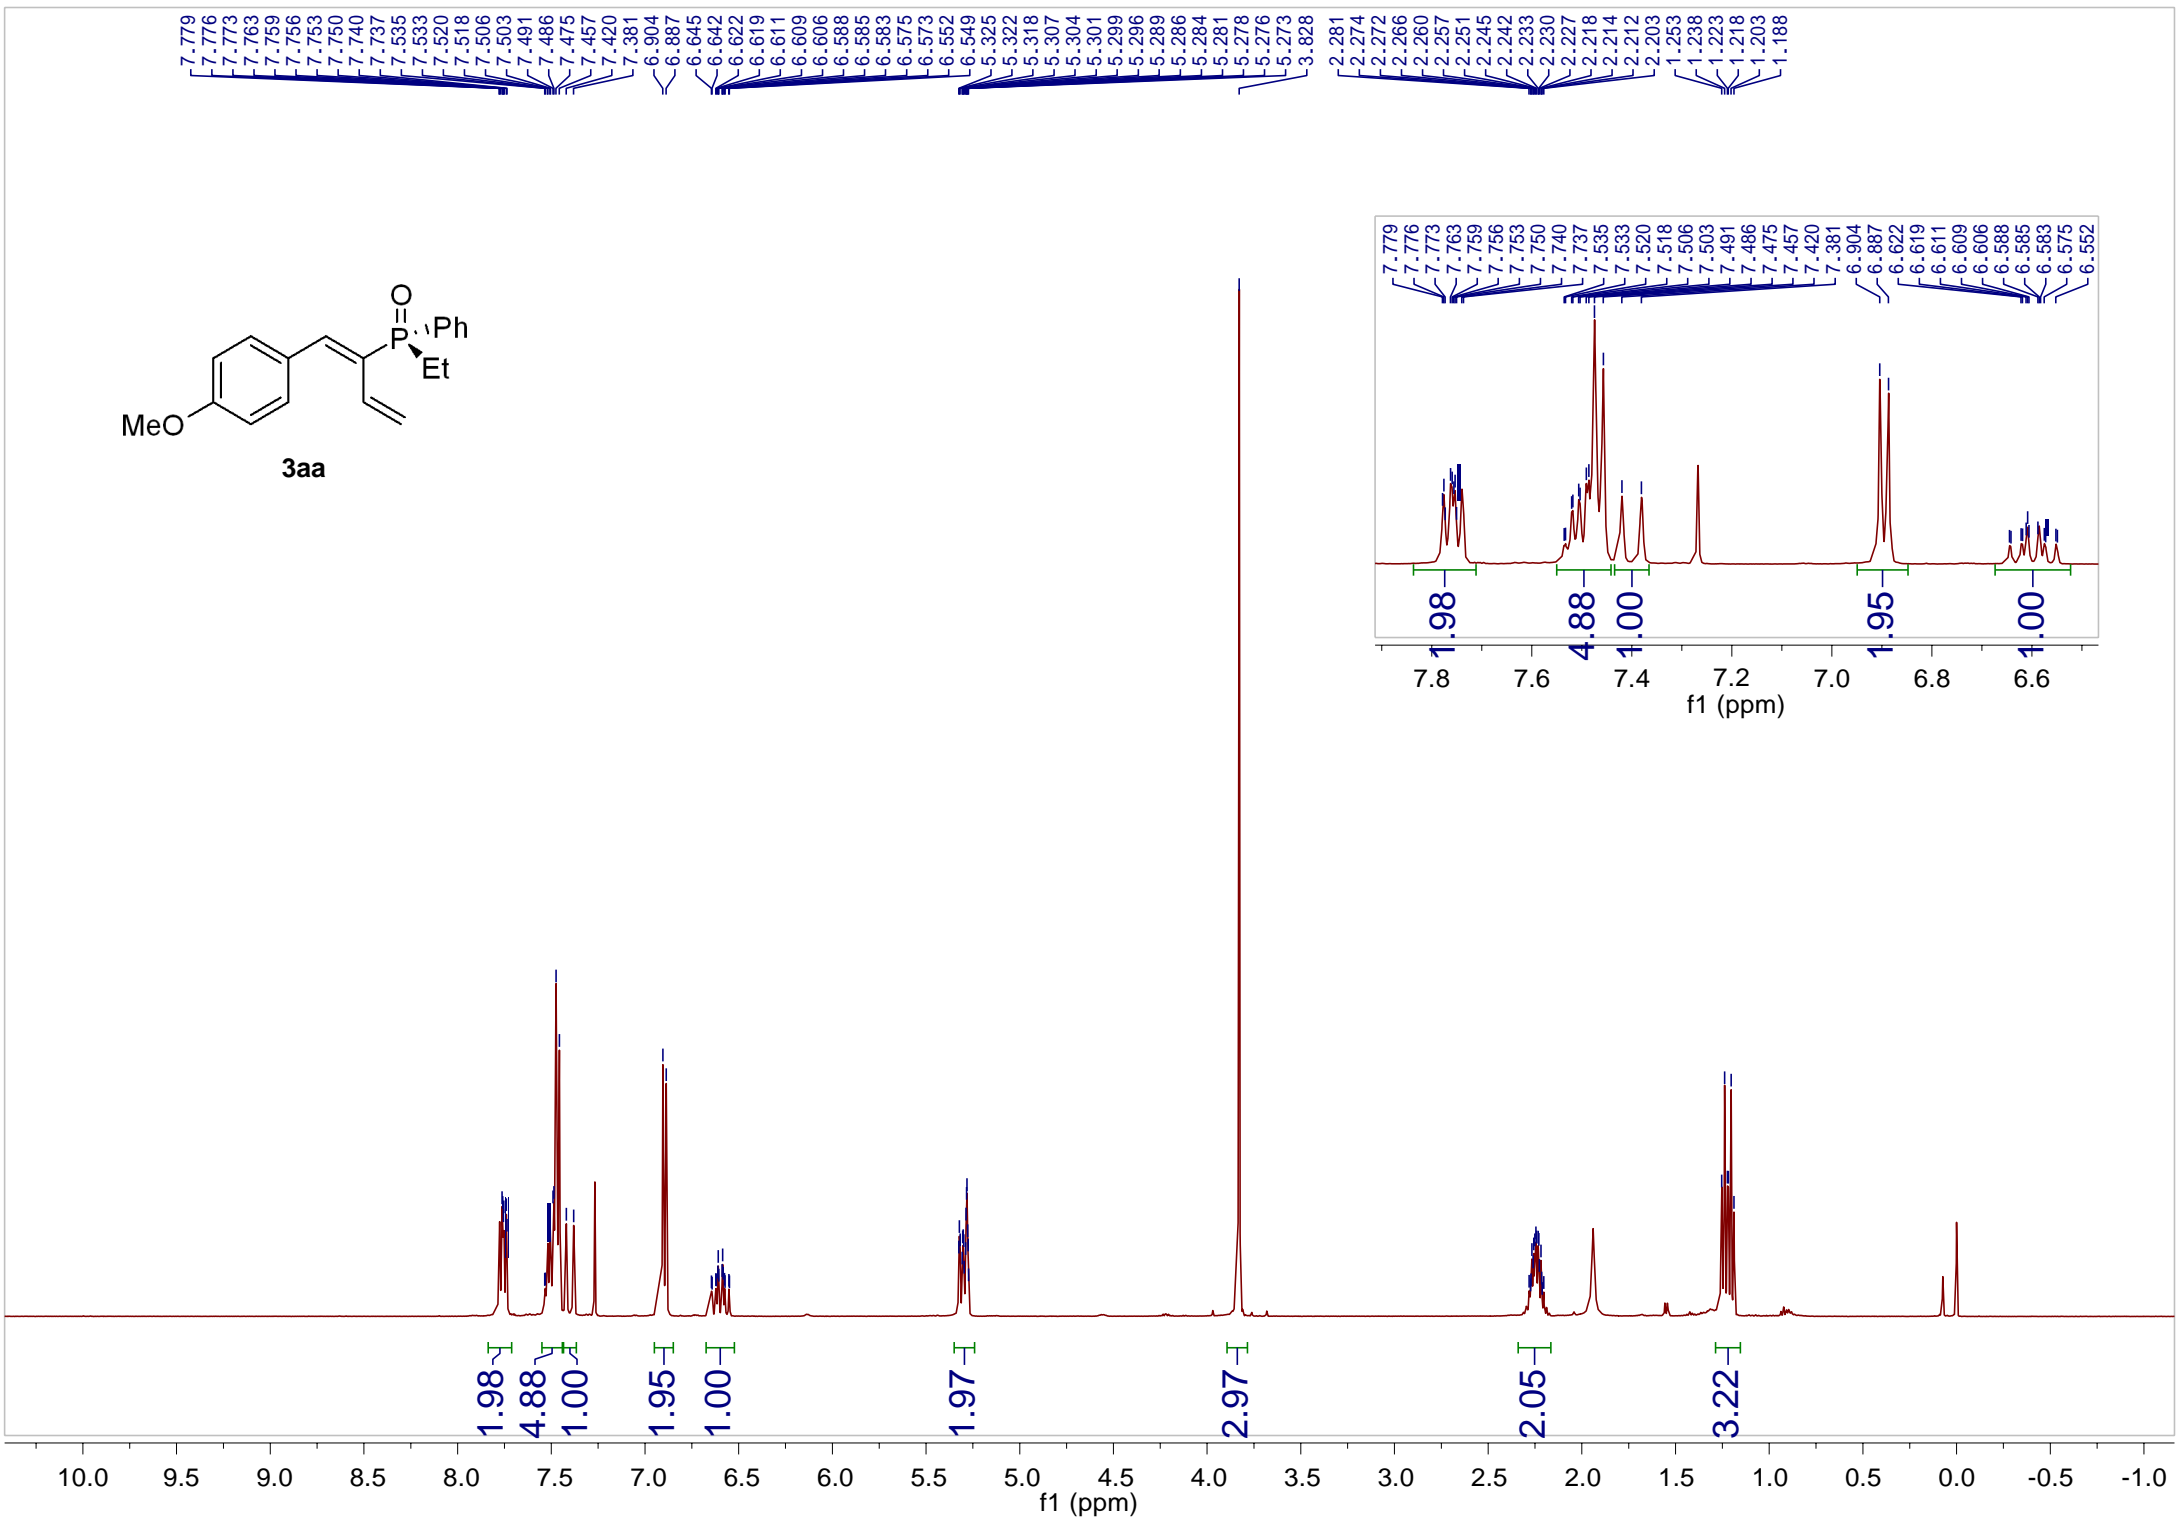

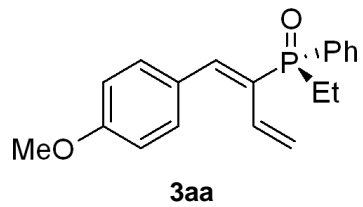

160.108  
142.234  
142.171  
133.572  
132.801  
131.924  
131.850  
131.812  
131.540  
131.519  
130.879  
130.806  
129.395  
128.675  
128.595  
128.503  
128.219  
128.084  
120.366  
120.319

113.759

55.291

20.468  
19.882

5.439  
5.401

200 190 180 170 160 150 140 130 120 110 100 90 80 70 60 50 40 30 20 10 0 -10

f1 (ppm)

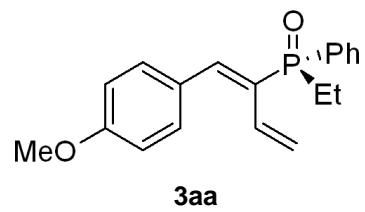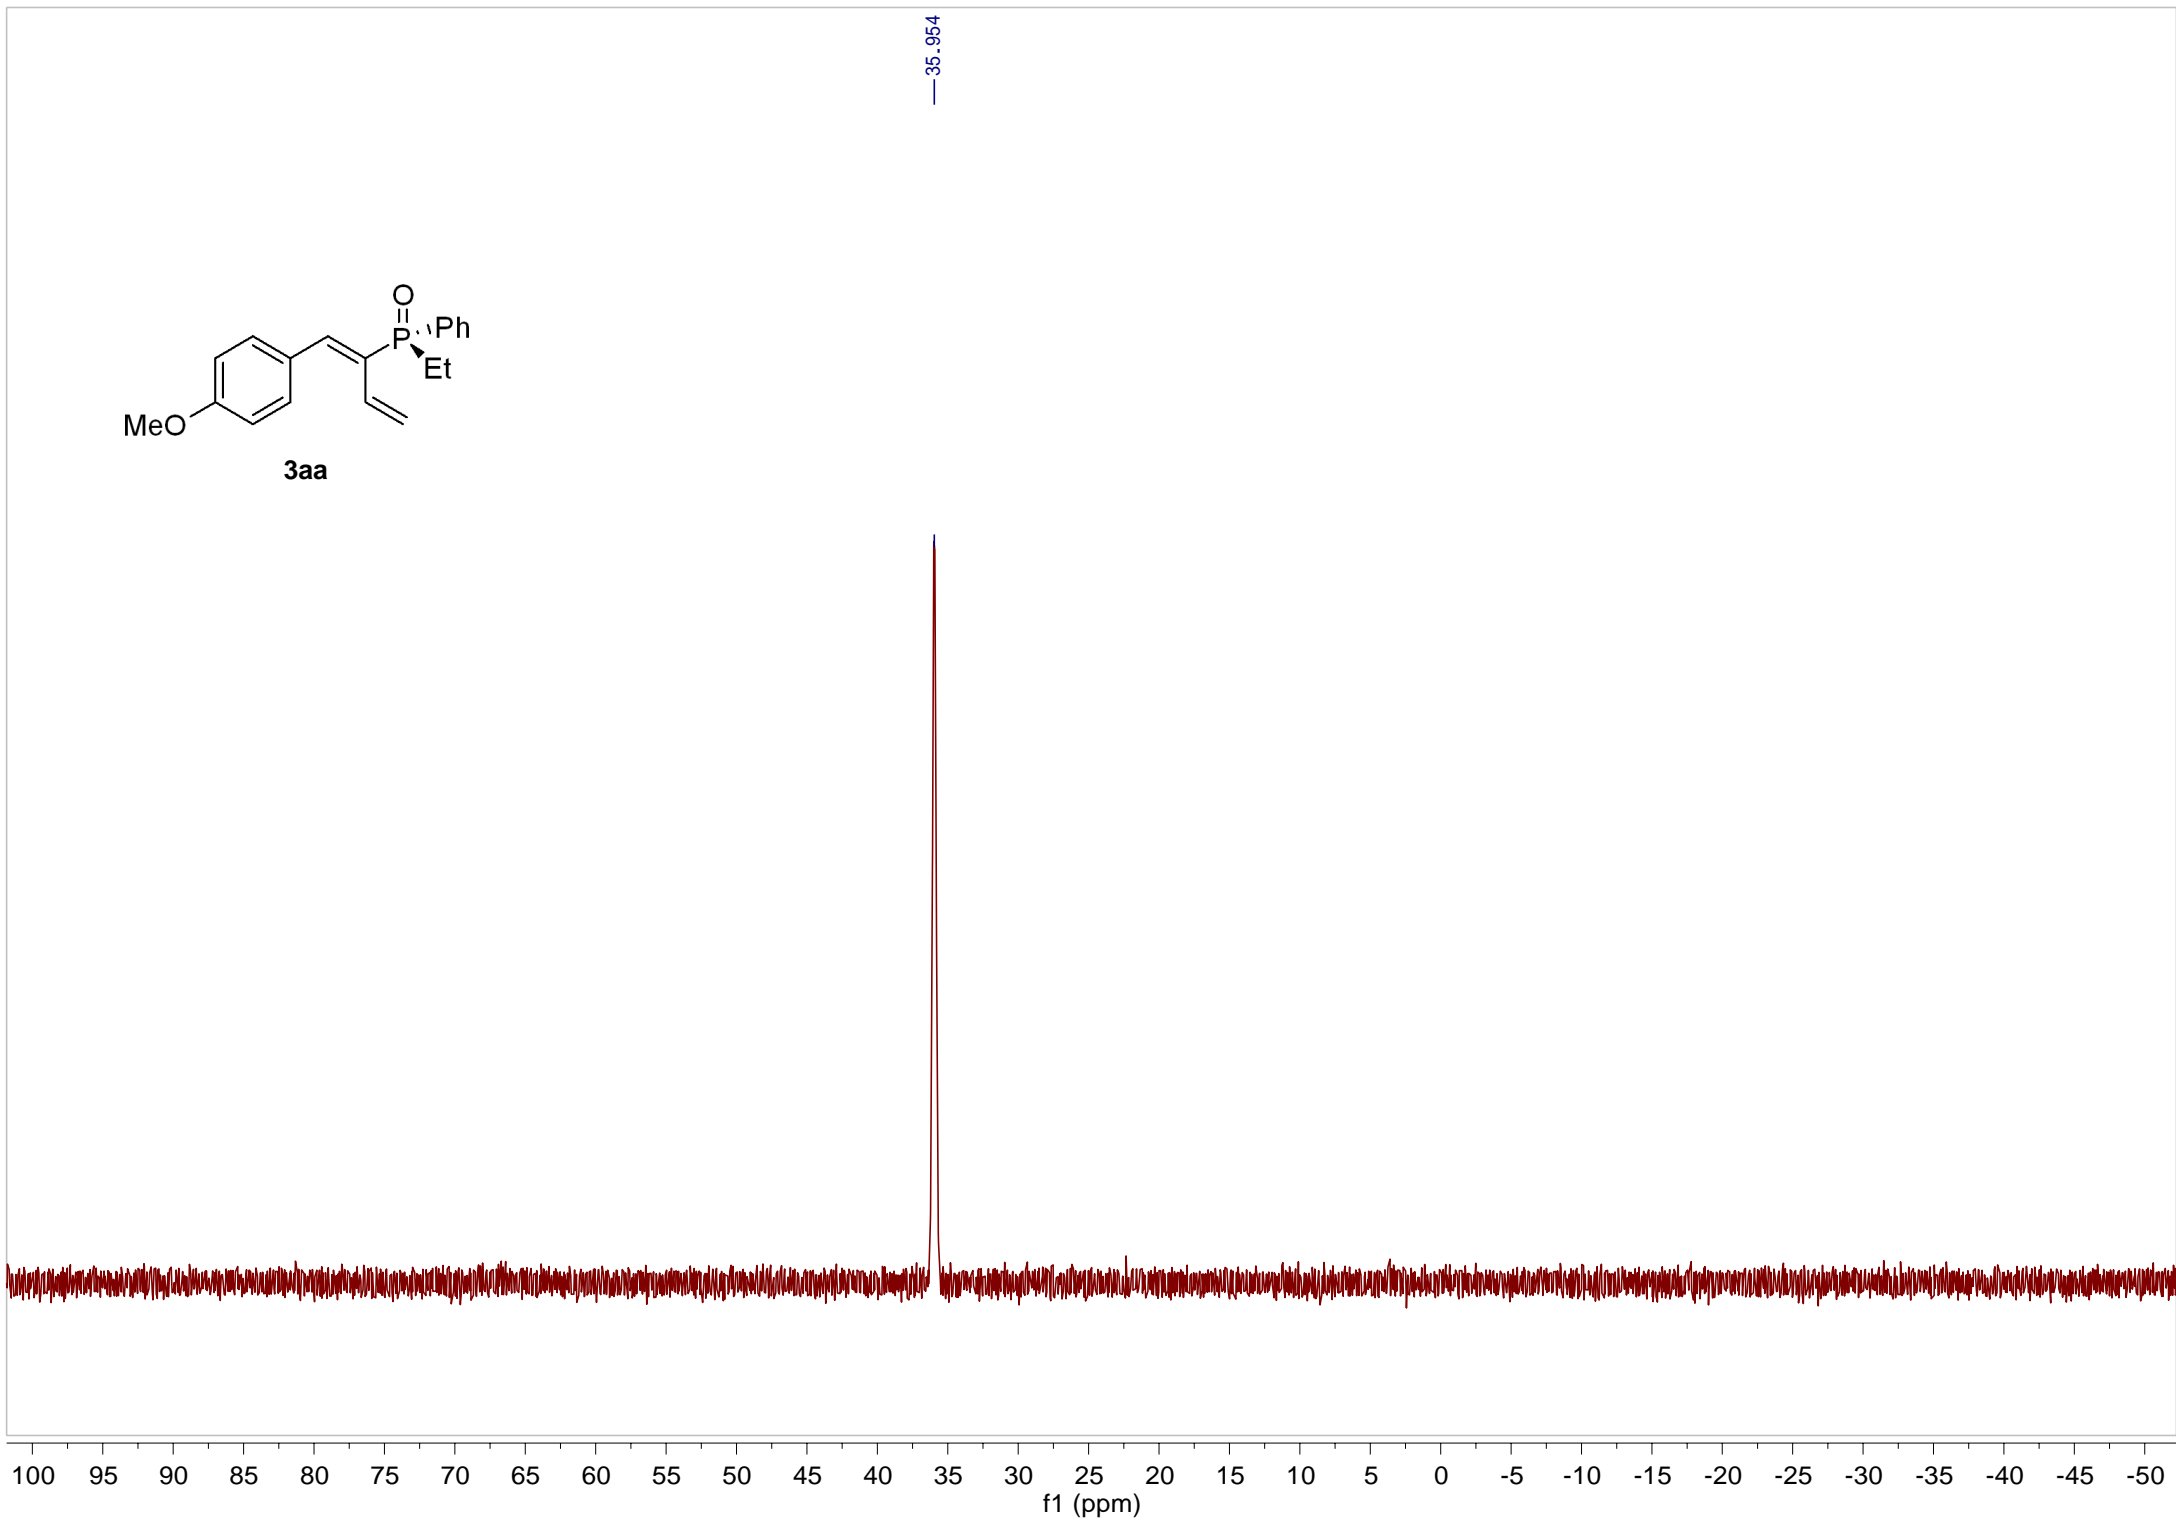

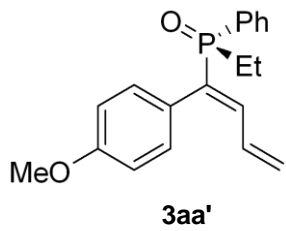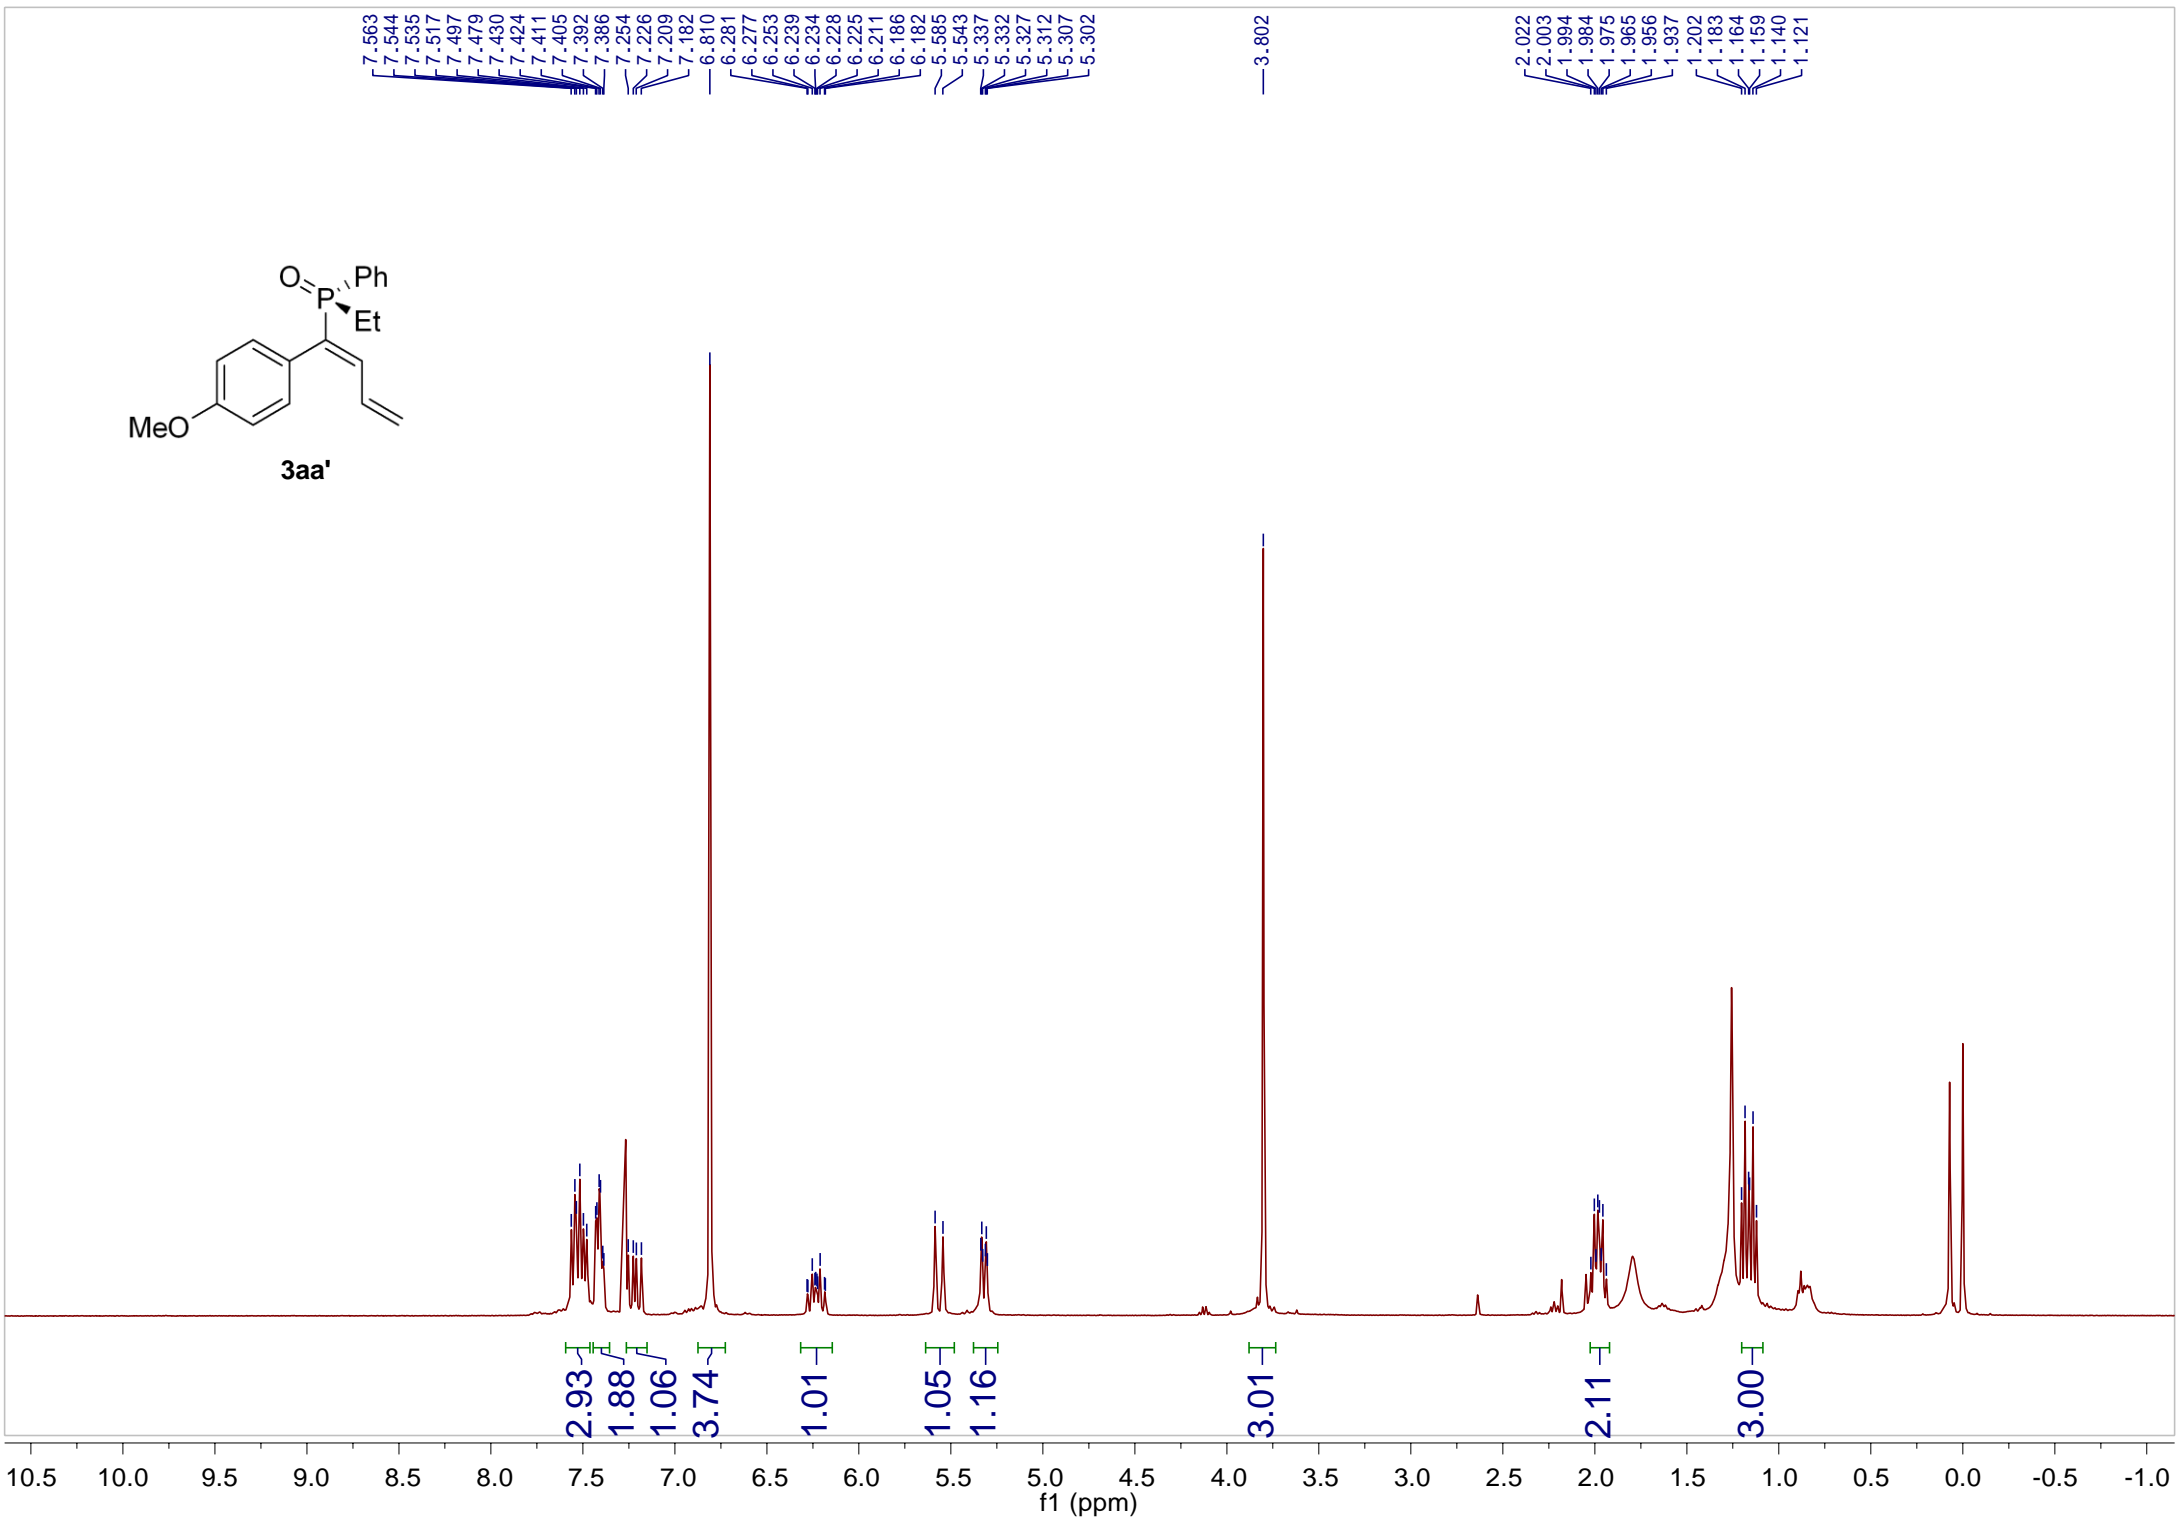

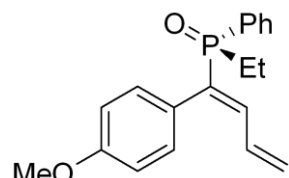

3aa'

159.128  
142.723  
142.643  
136.601  
135.698  
132.797  
132.644  
132.093  
131.514  
131.488  
131.165  
131.127  
131.079  
130.755  
130.715  
128.332  
128.219  
127.256  
127.154  
124.105  
113.790

55.204

20.451  
19.714

5.235  
5.185

200 190 180 170 160 150 140 130 120 110 100 90 80 70 60 50 40 30 20 10 0 -10  
f1 (ppm)

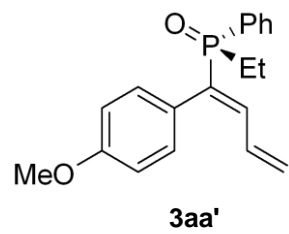

— 33.731

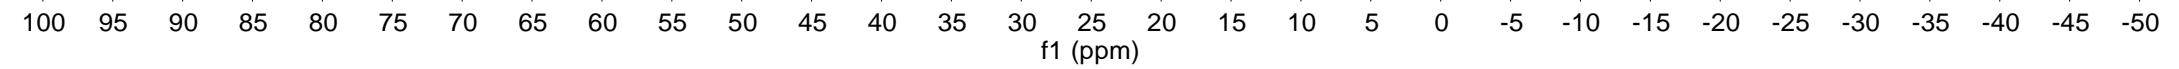

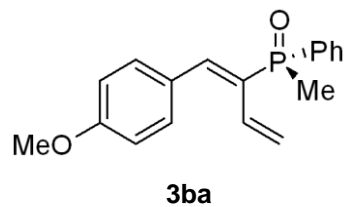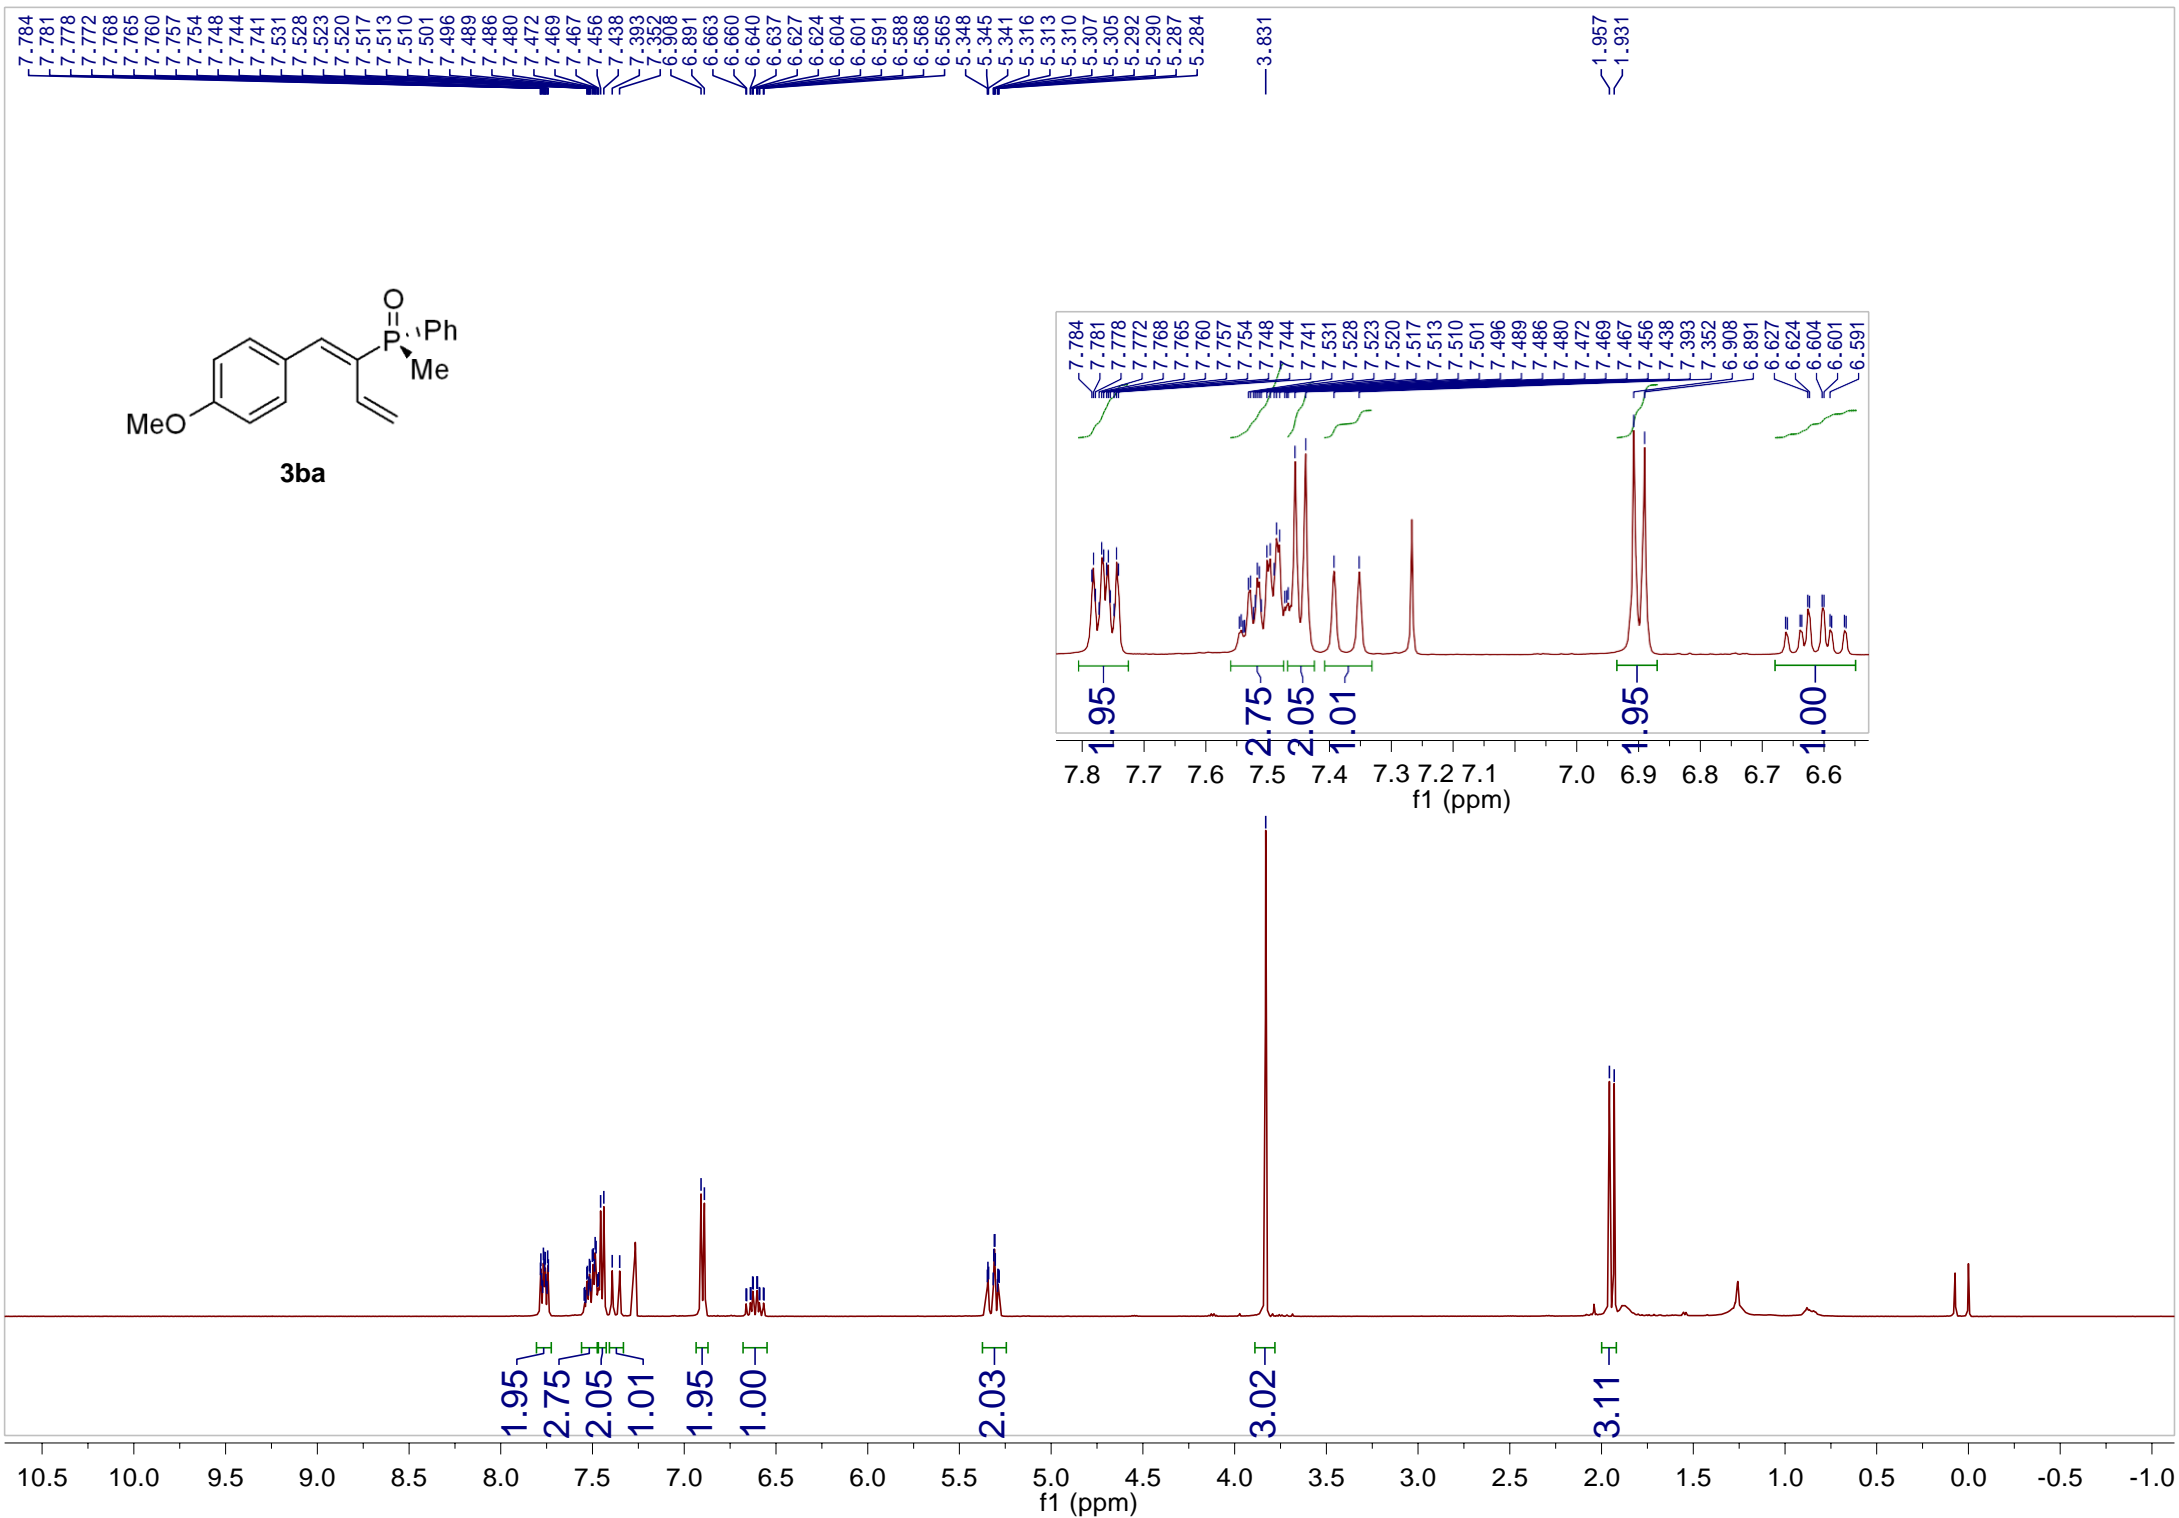



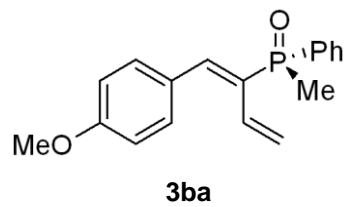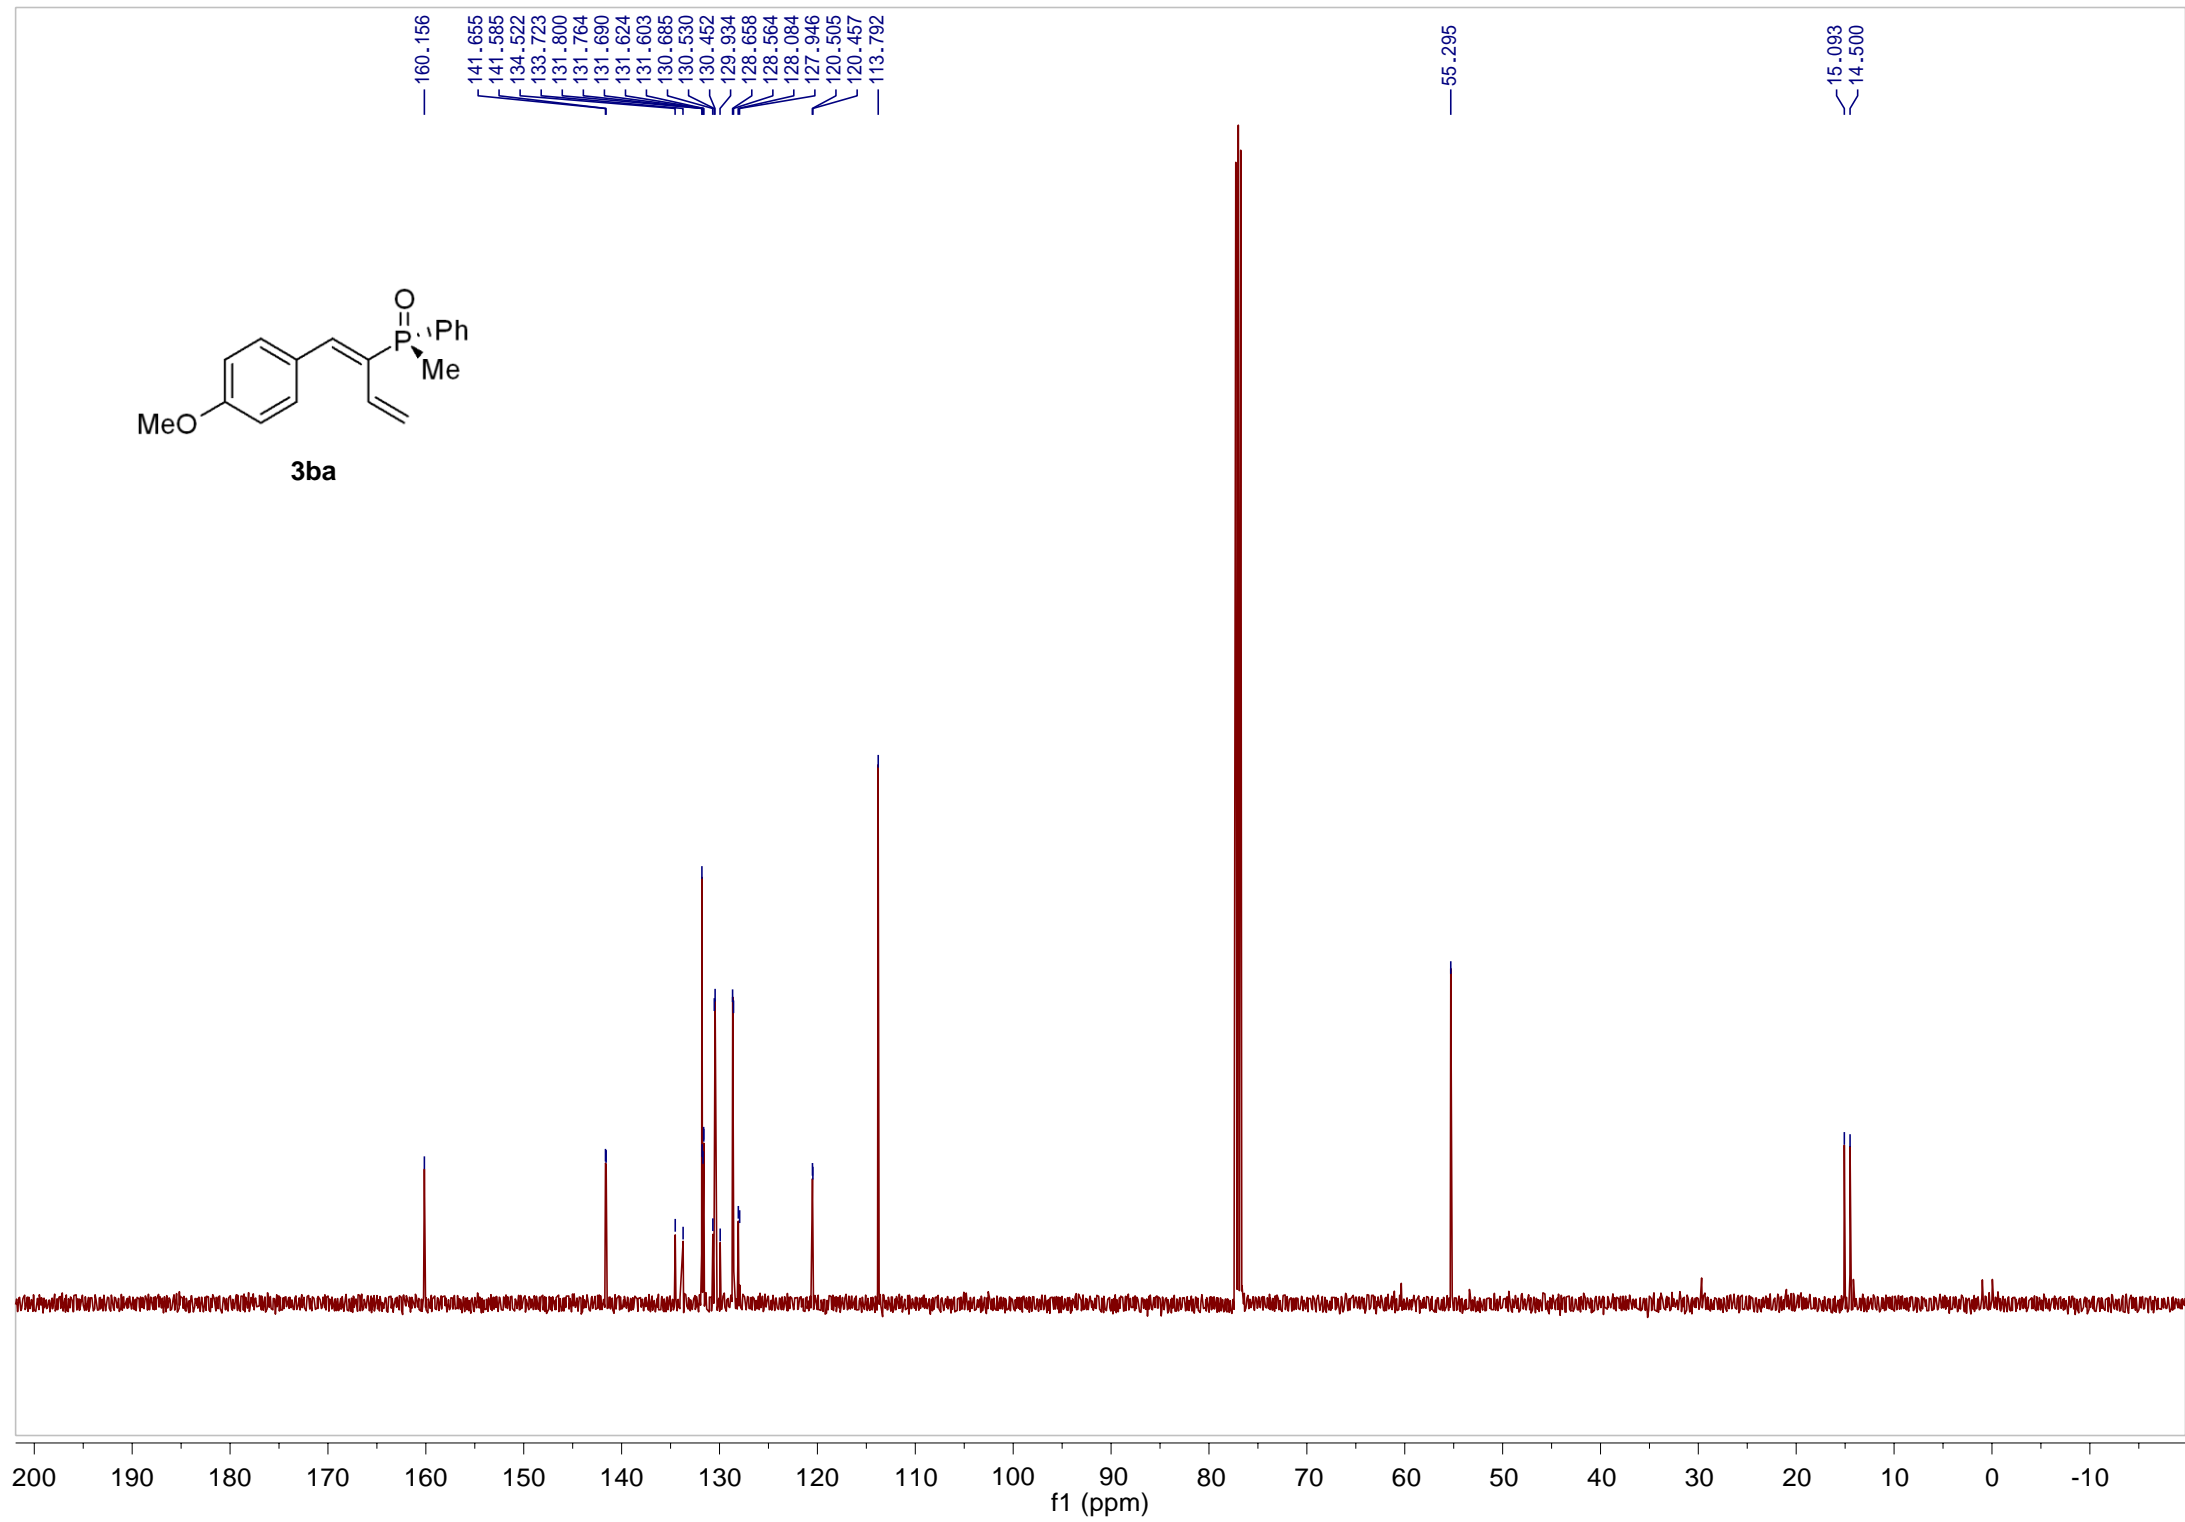

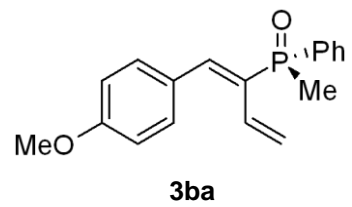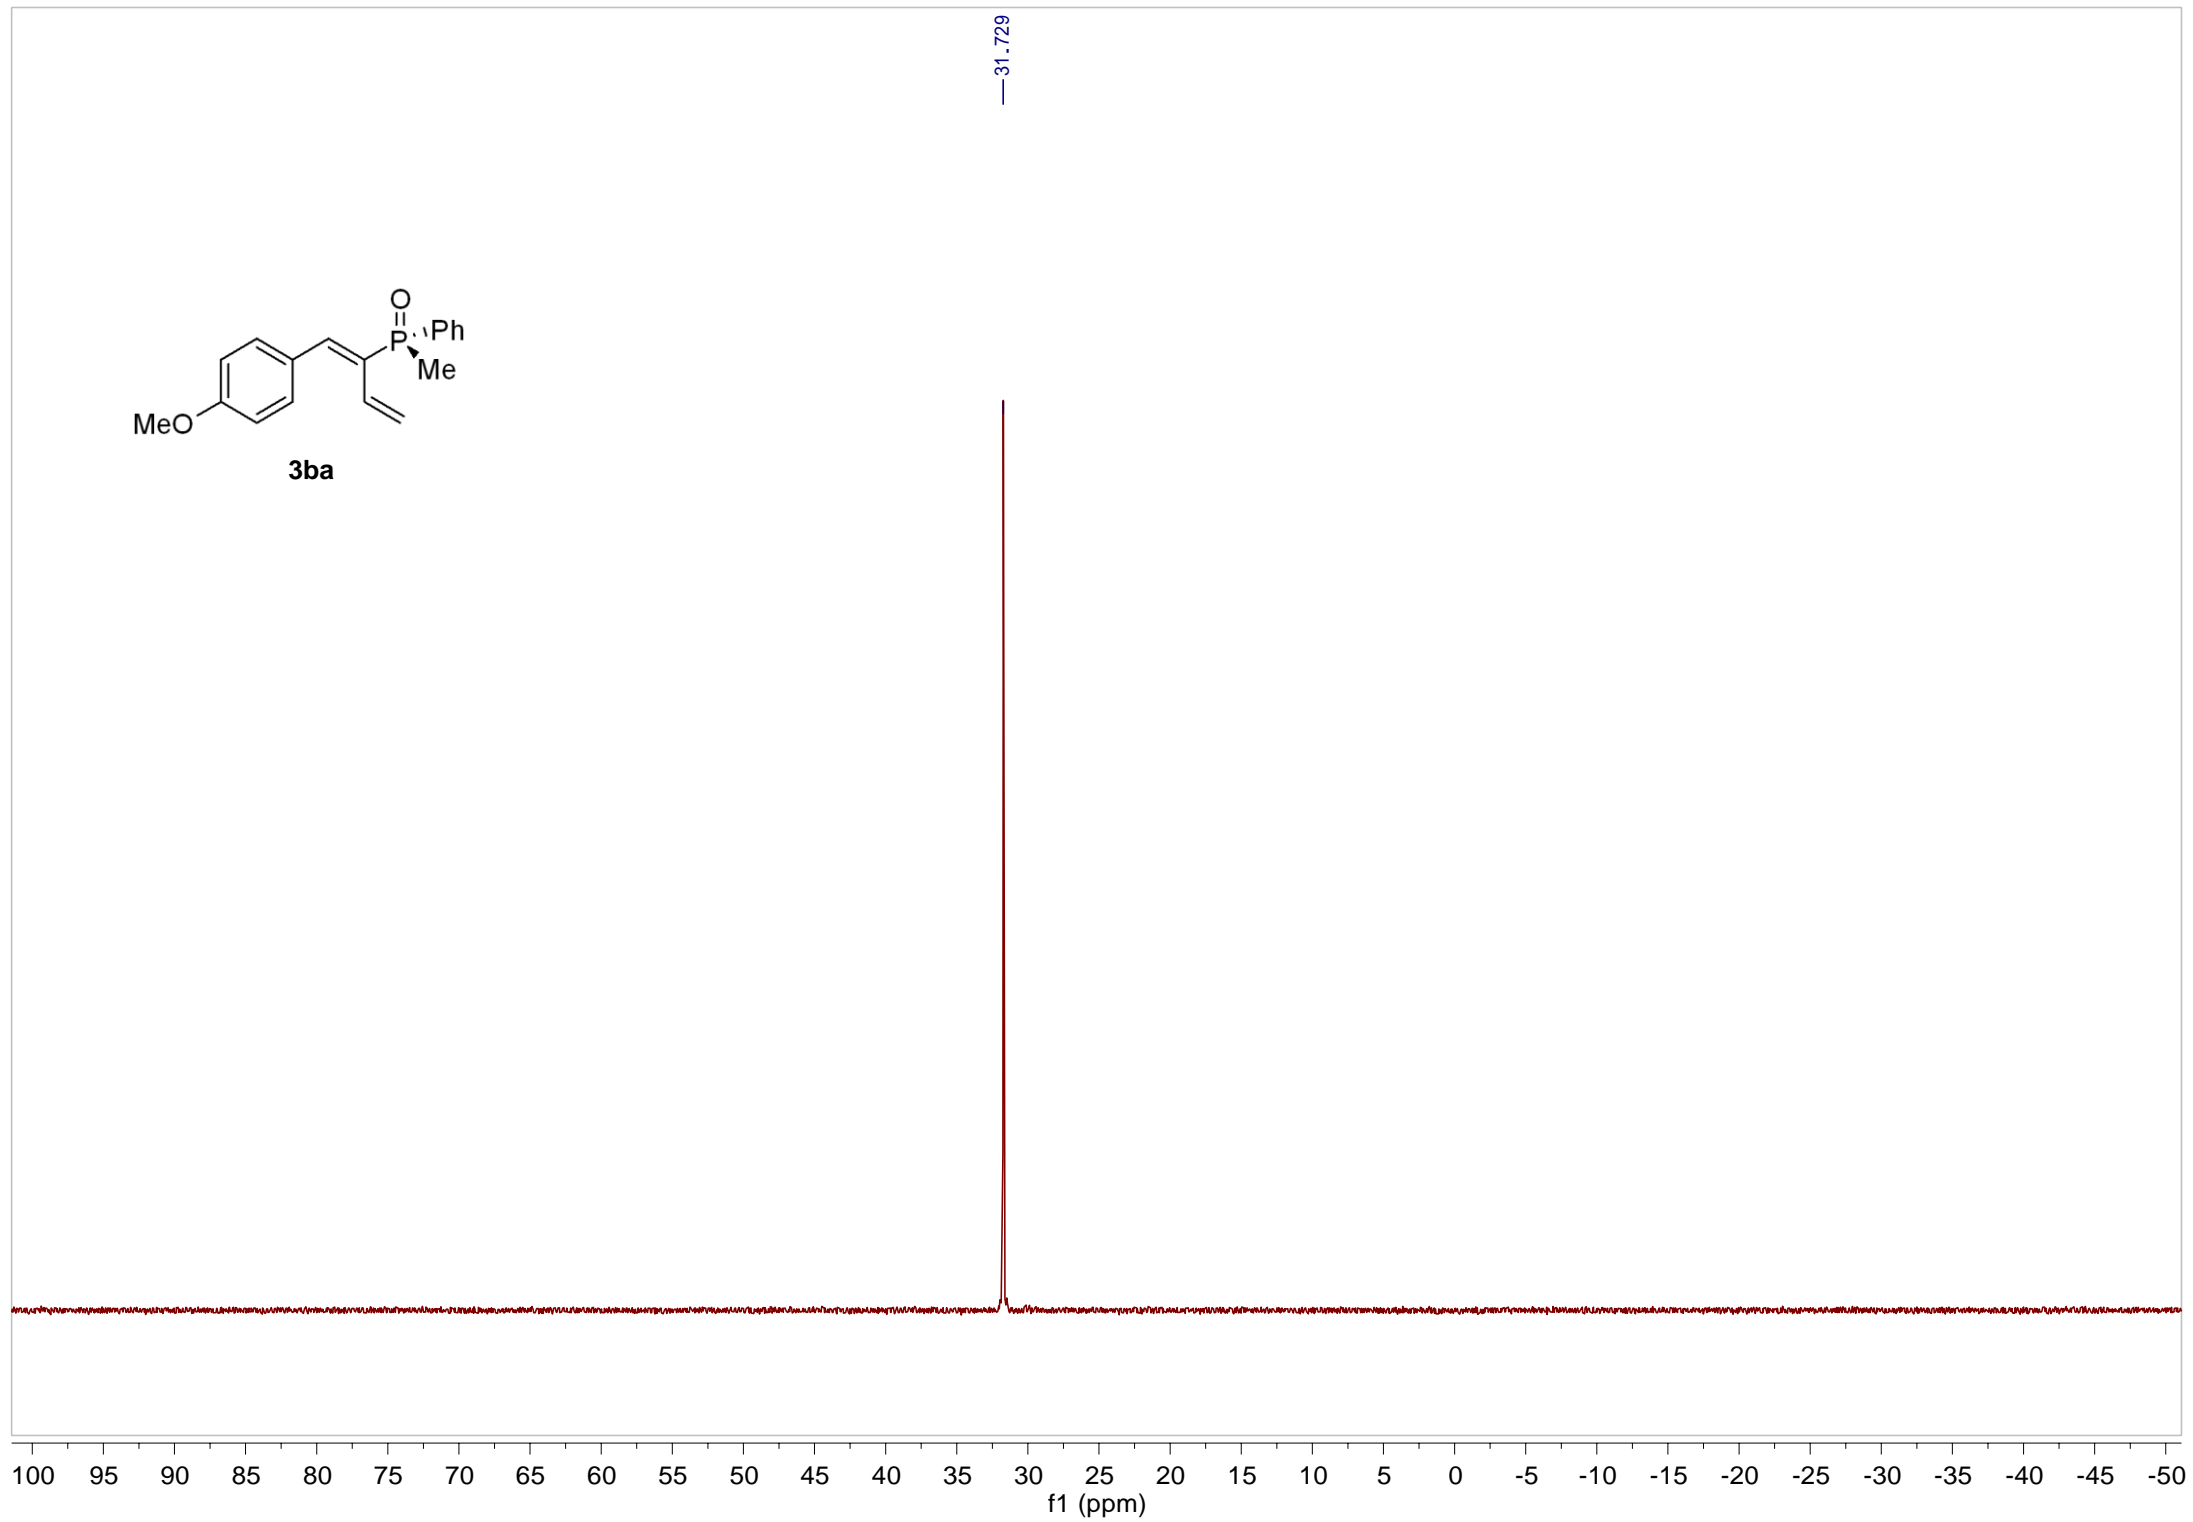

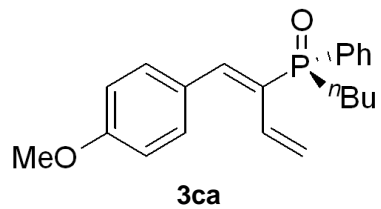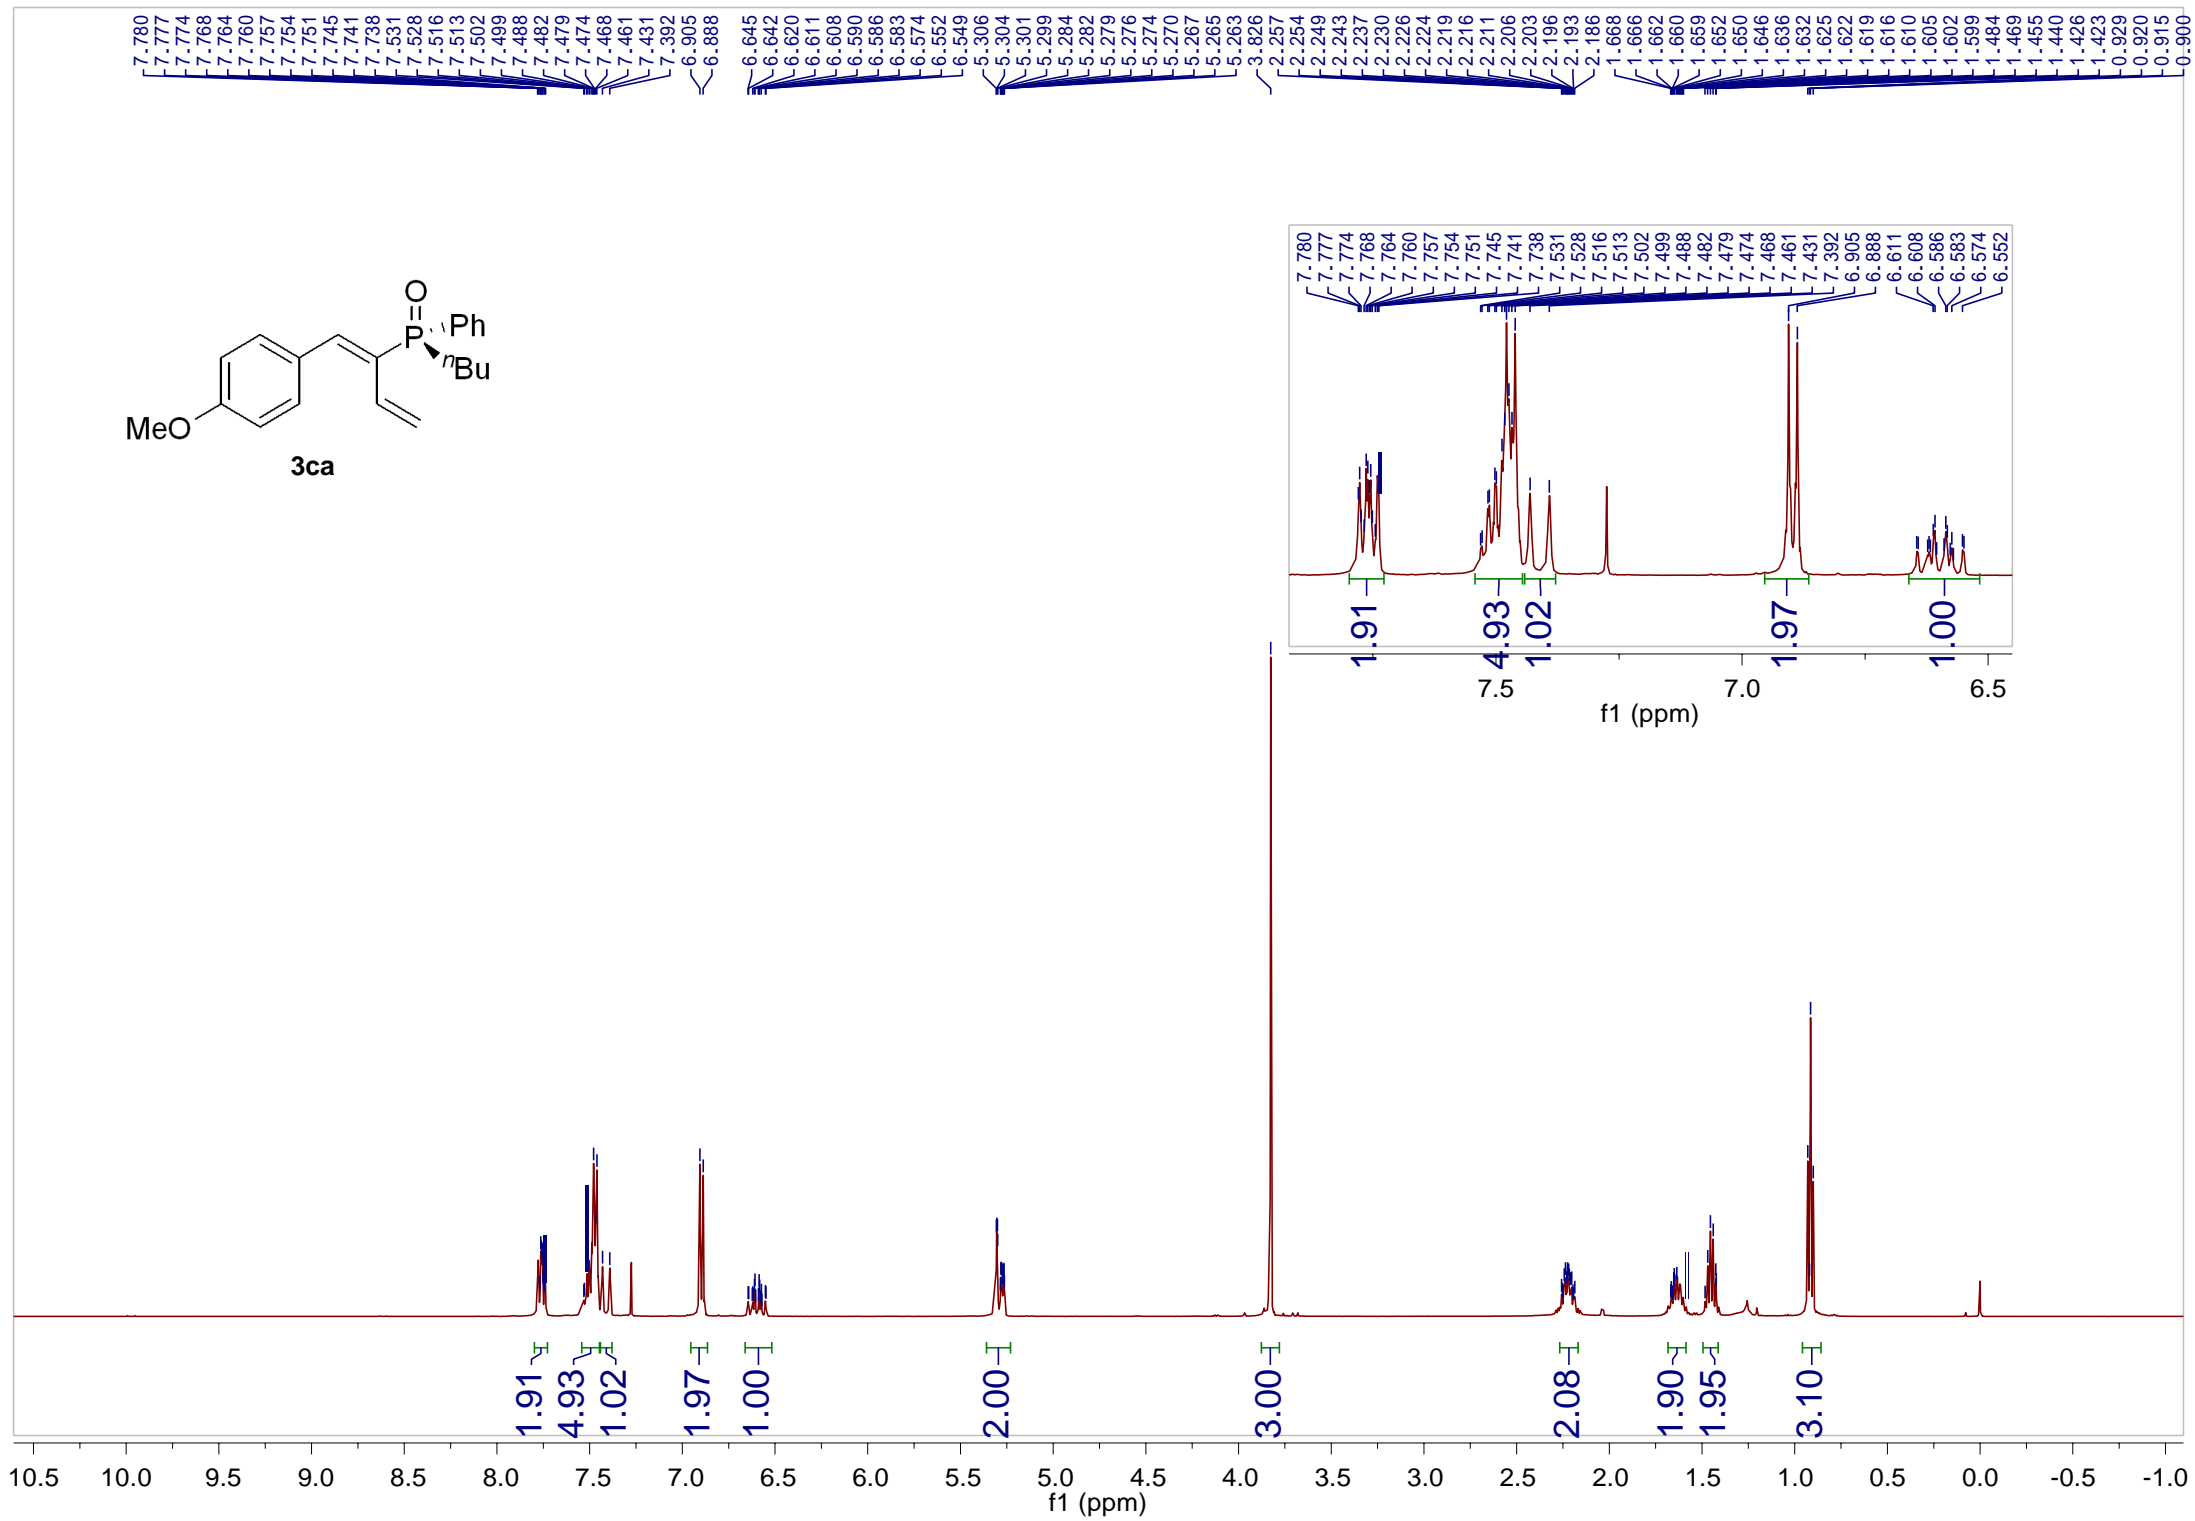

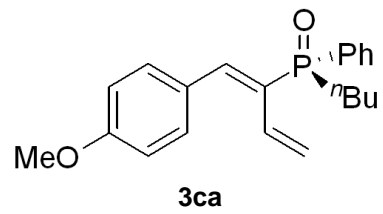

160.032  
142.055  
141.993  
133.845  
133.074  
131.869  
131.862  
131.784  
131.478  
131.456  
130.768  
130.695  
129.581  
128.859  
128.546  
128.455  
128.170  
128.038  
120.284  
120.238

113.698

55.253

27.061  
26.480  
24.153  
24.031  
23.335  
23.305

13.597

190 180 170 160 150 140 130 120 110 100 90 80 70 60 50 40 30 20 10 0 -10

f1 (ppm)

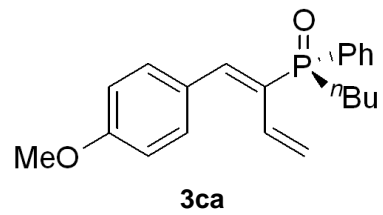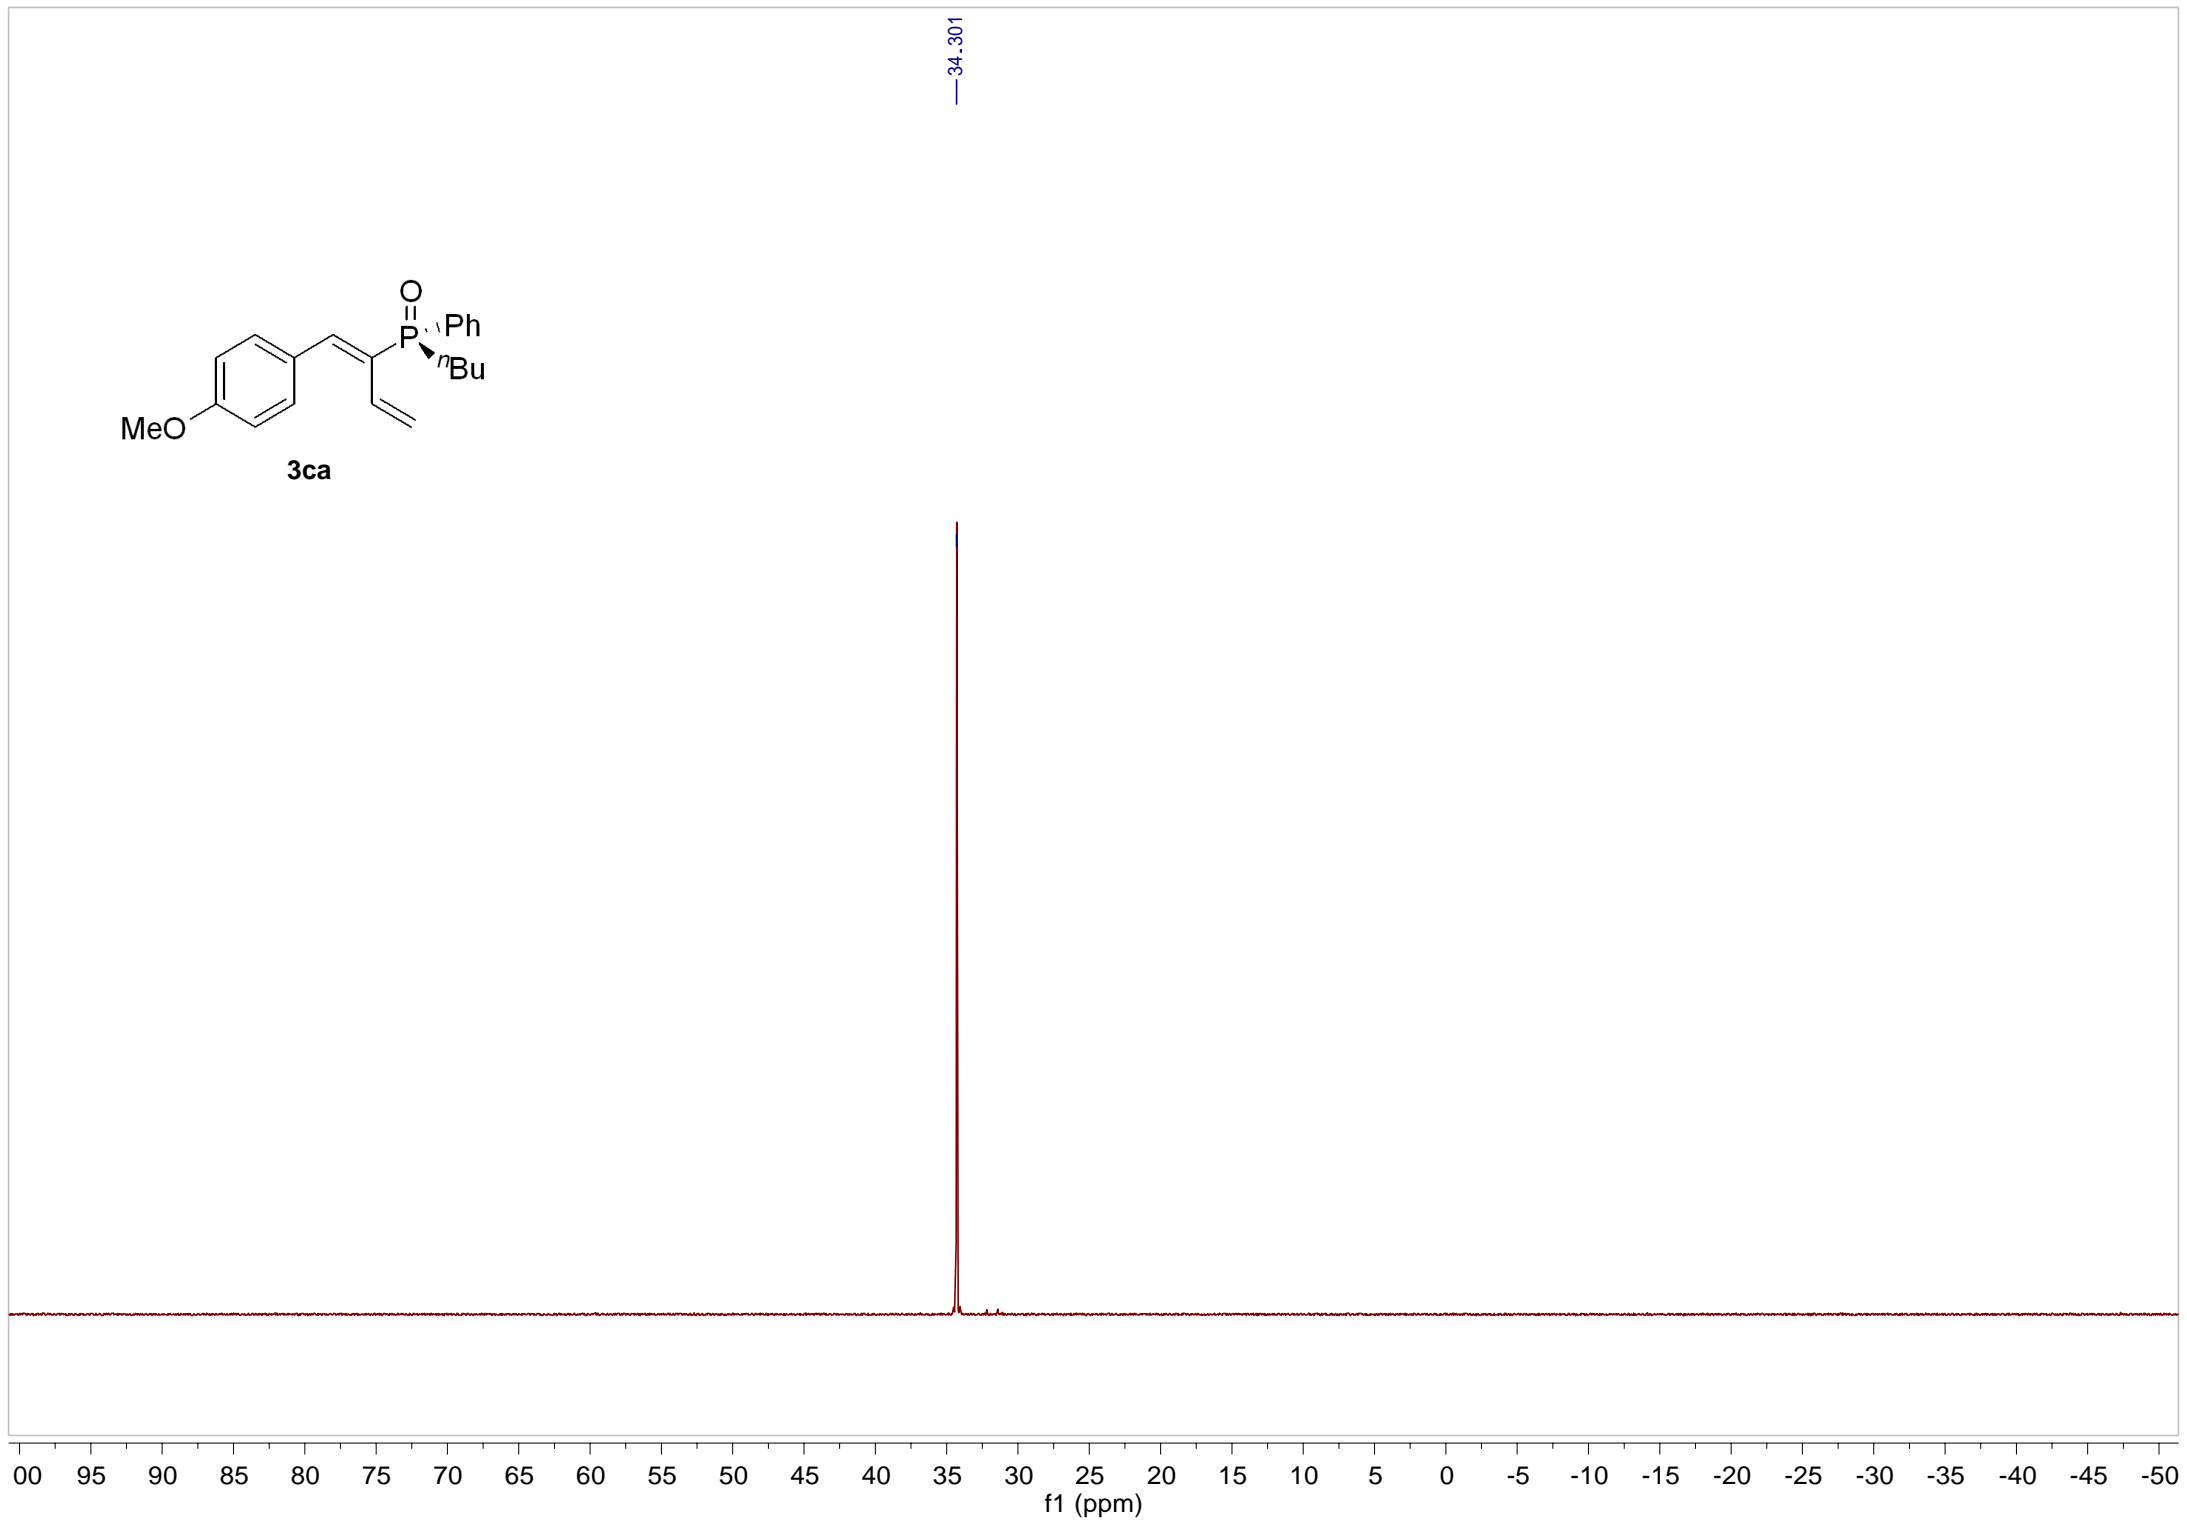

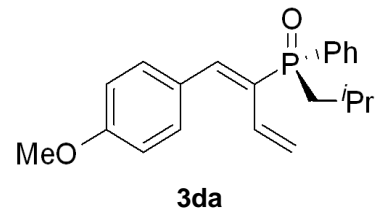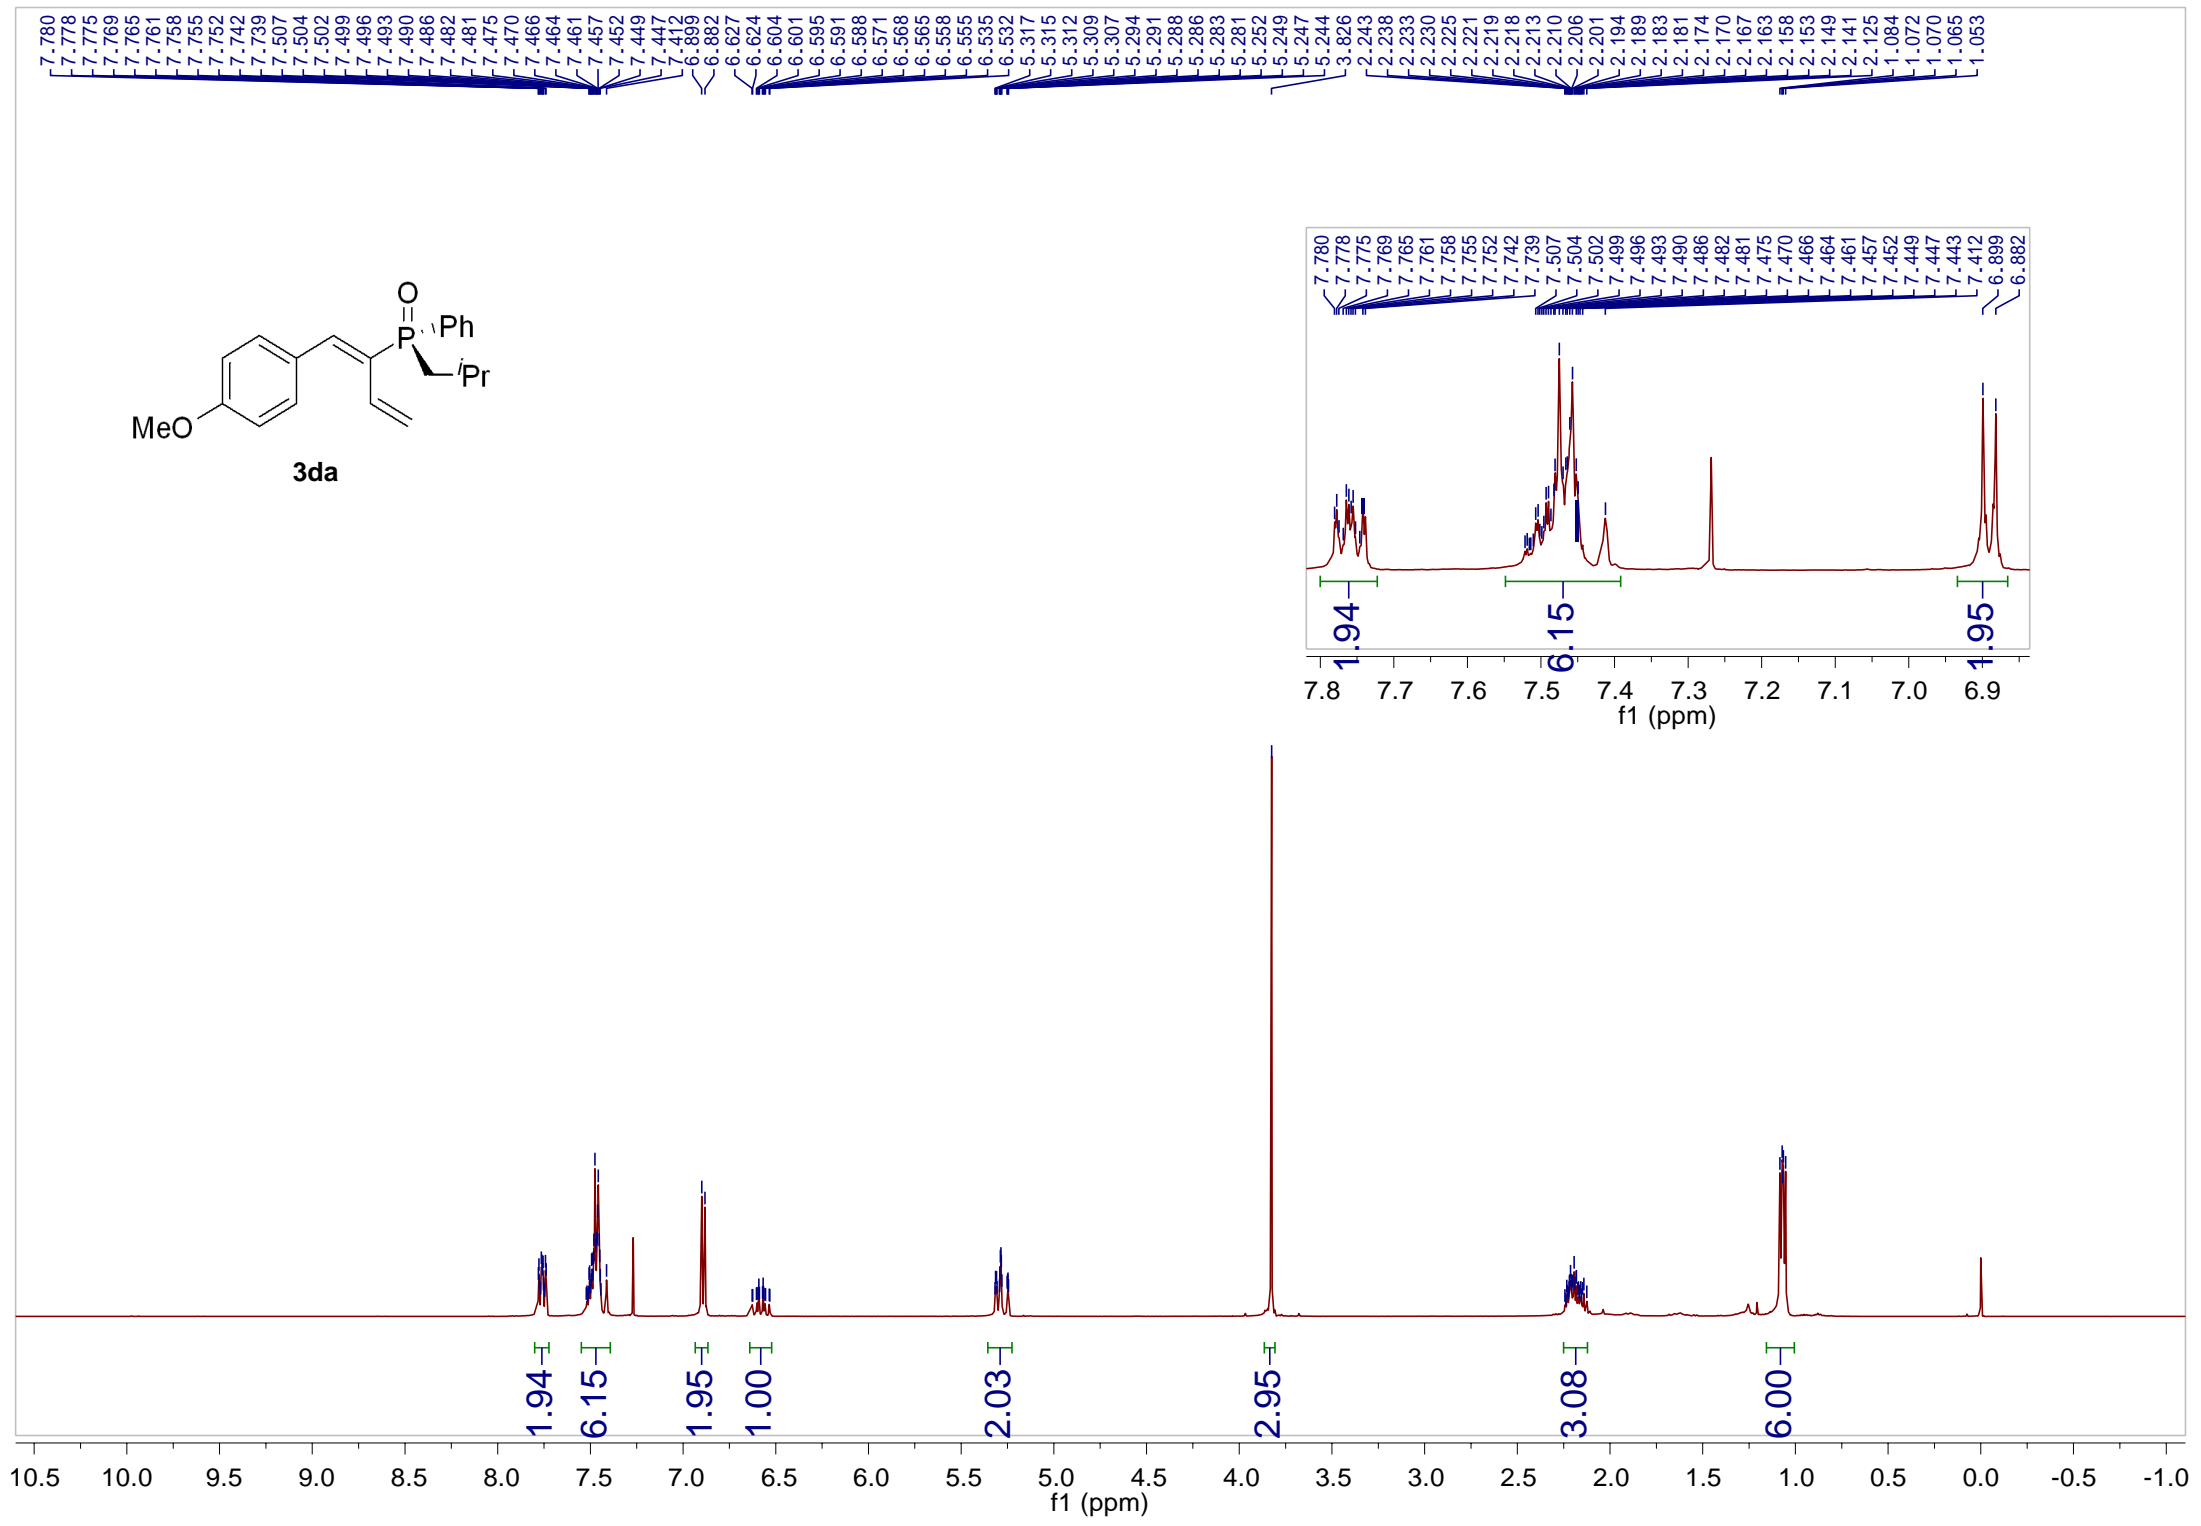

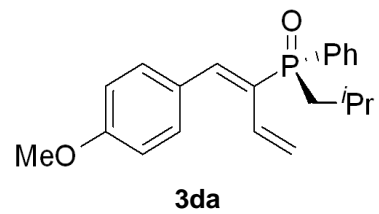

160.019  
141.832  
141.771  
134.404  
133.637  
132.153  
132.080  
131.783  
131.405  
131.382  
130.797  
130.725  
130.418  
129.701  
128.514  
128.423  
128.276  
128.145  
120.395  
120.349

113.711

55.279

35.681  
35.109

24.778  
24.710  
24.626  
24.552  
23.553  
23.524

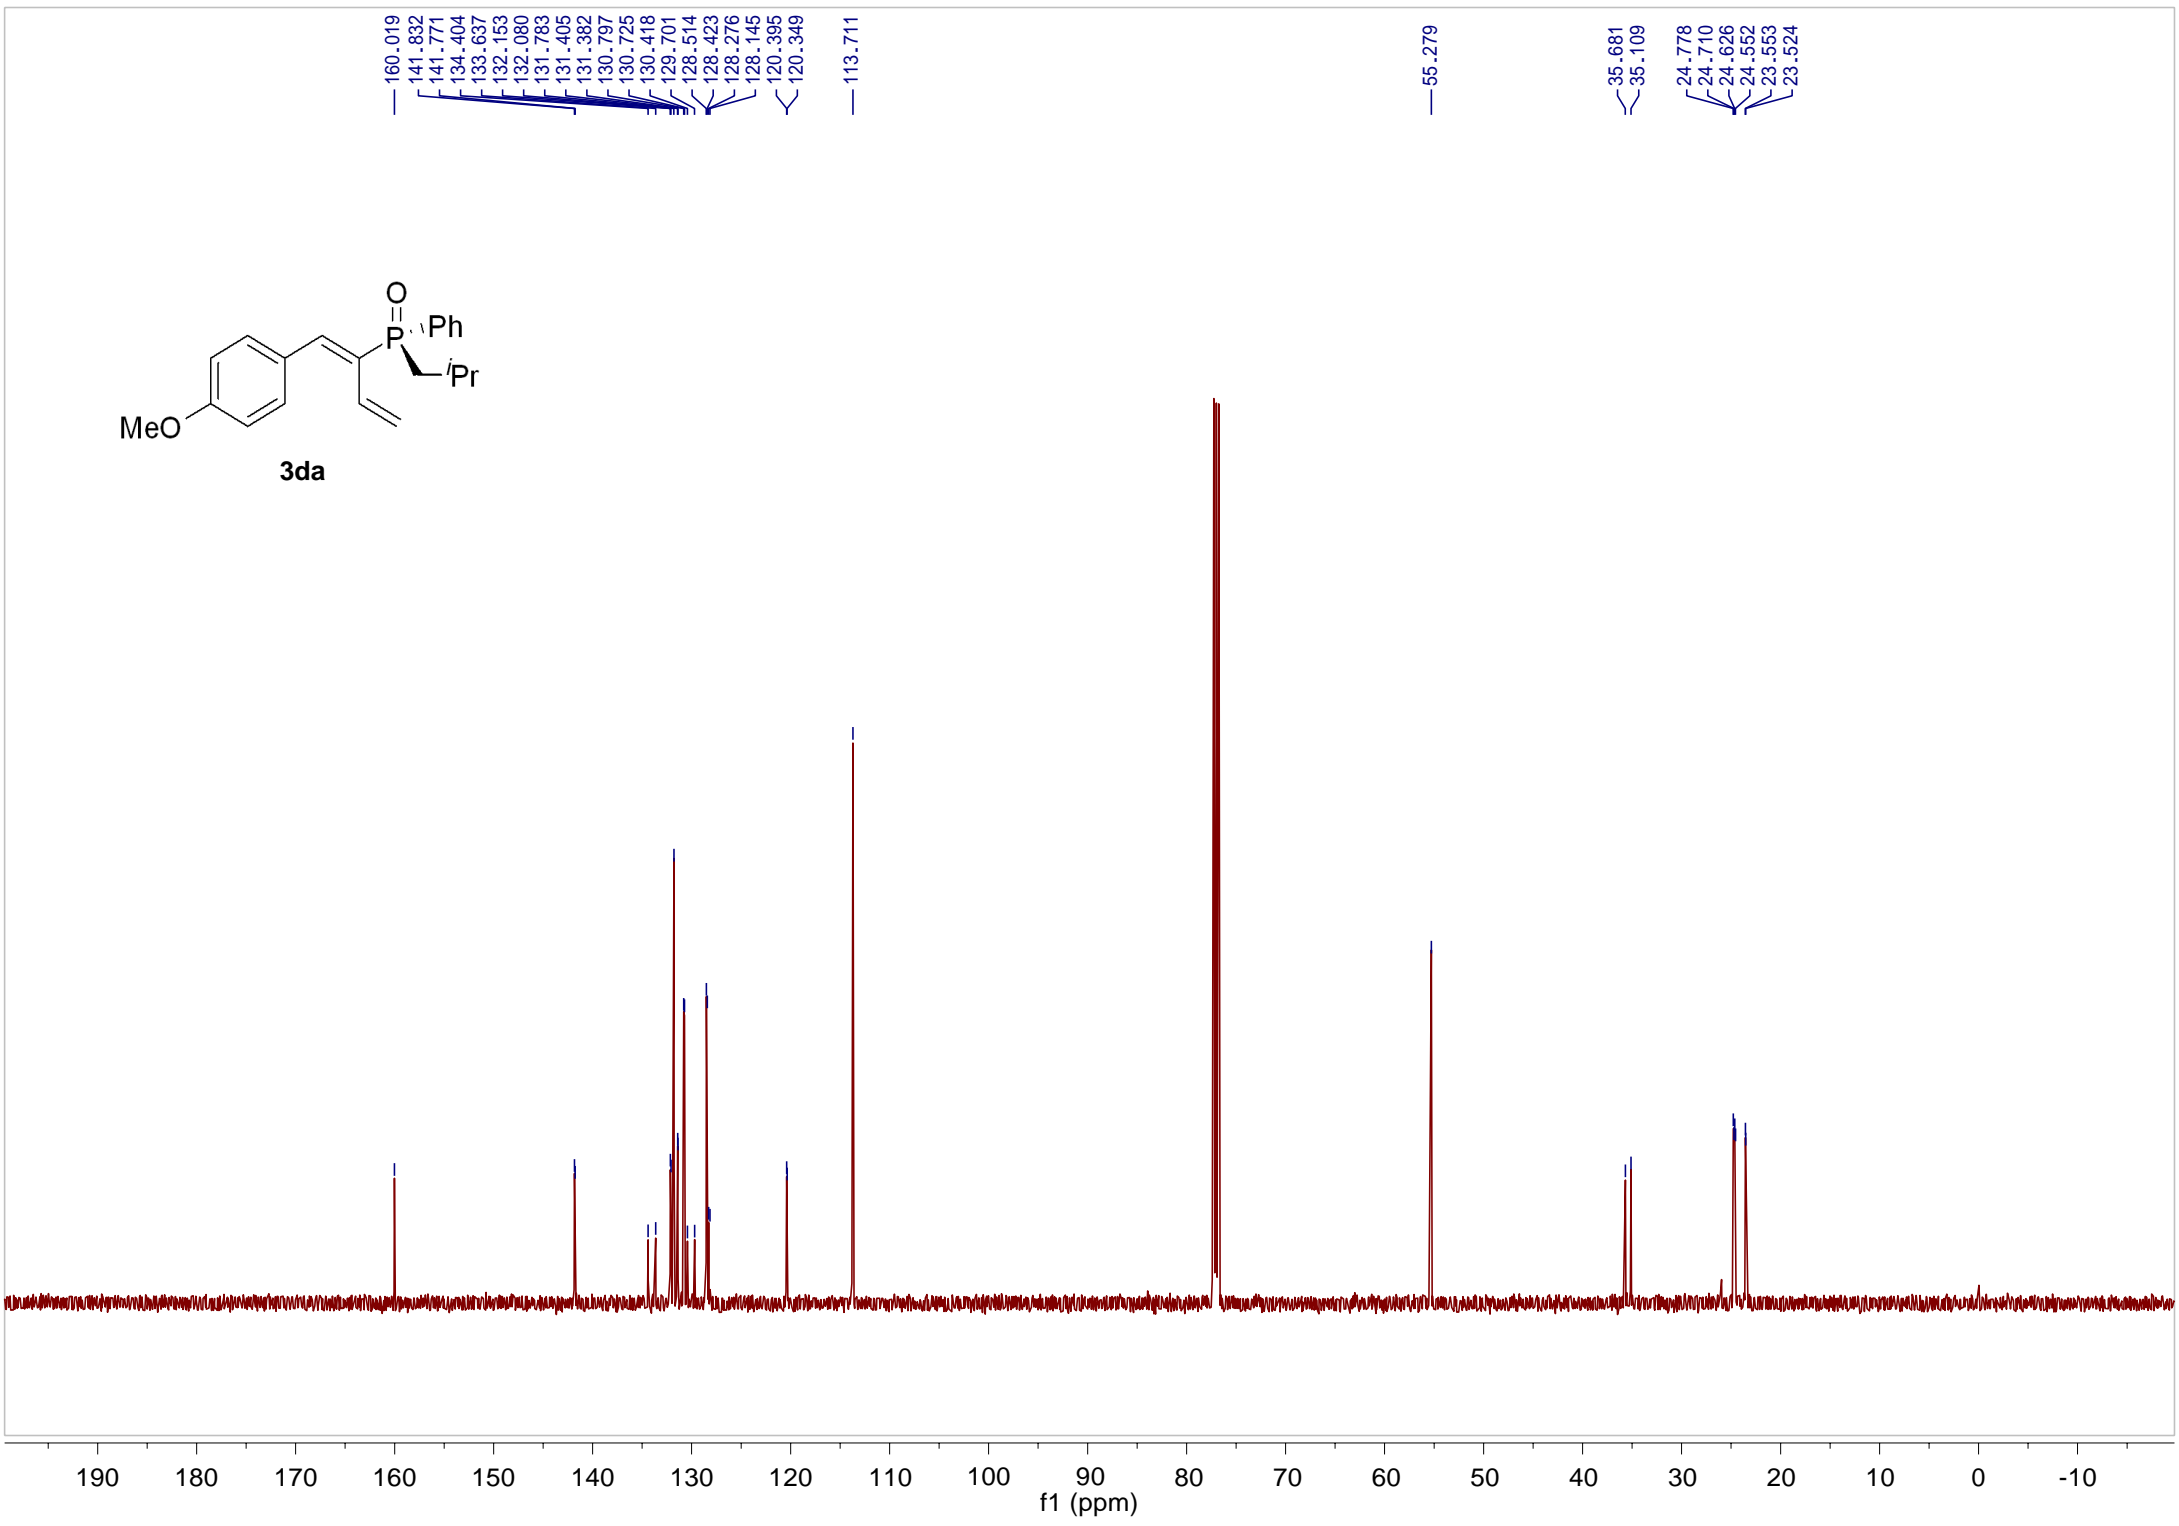

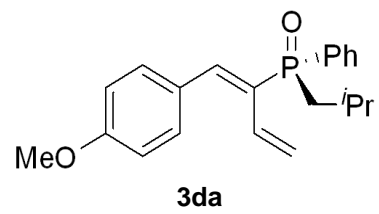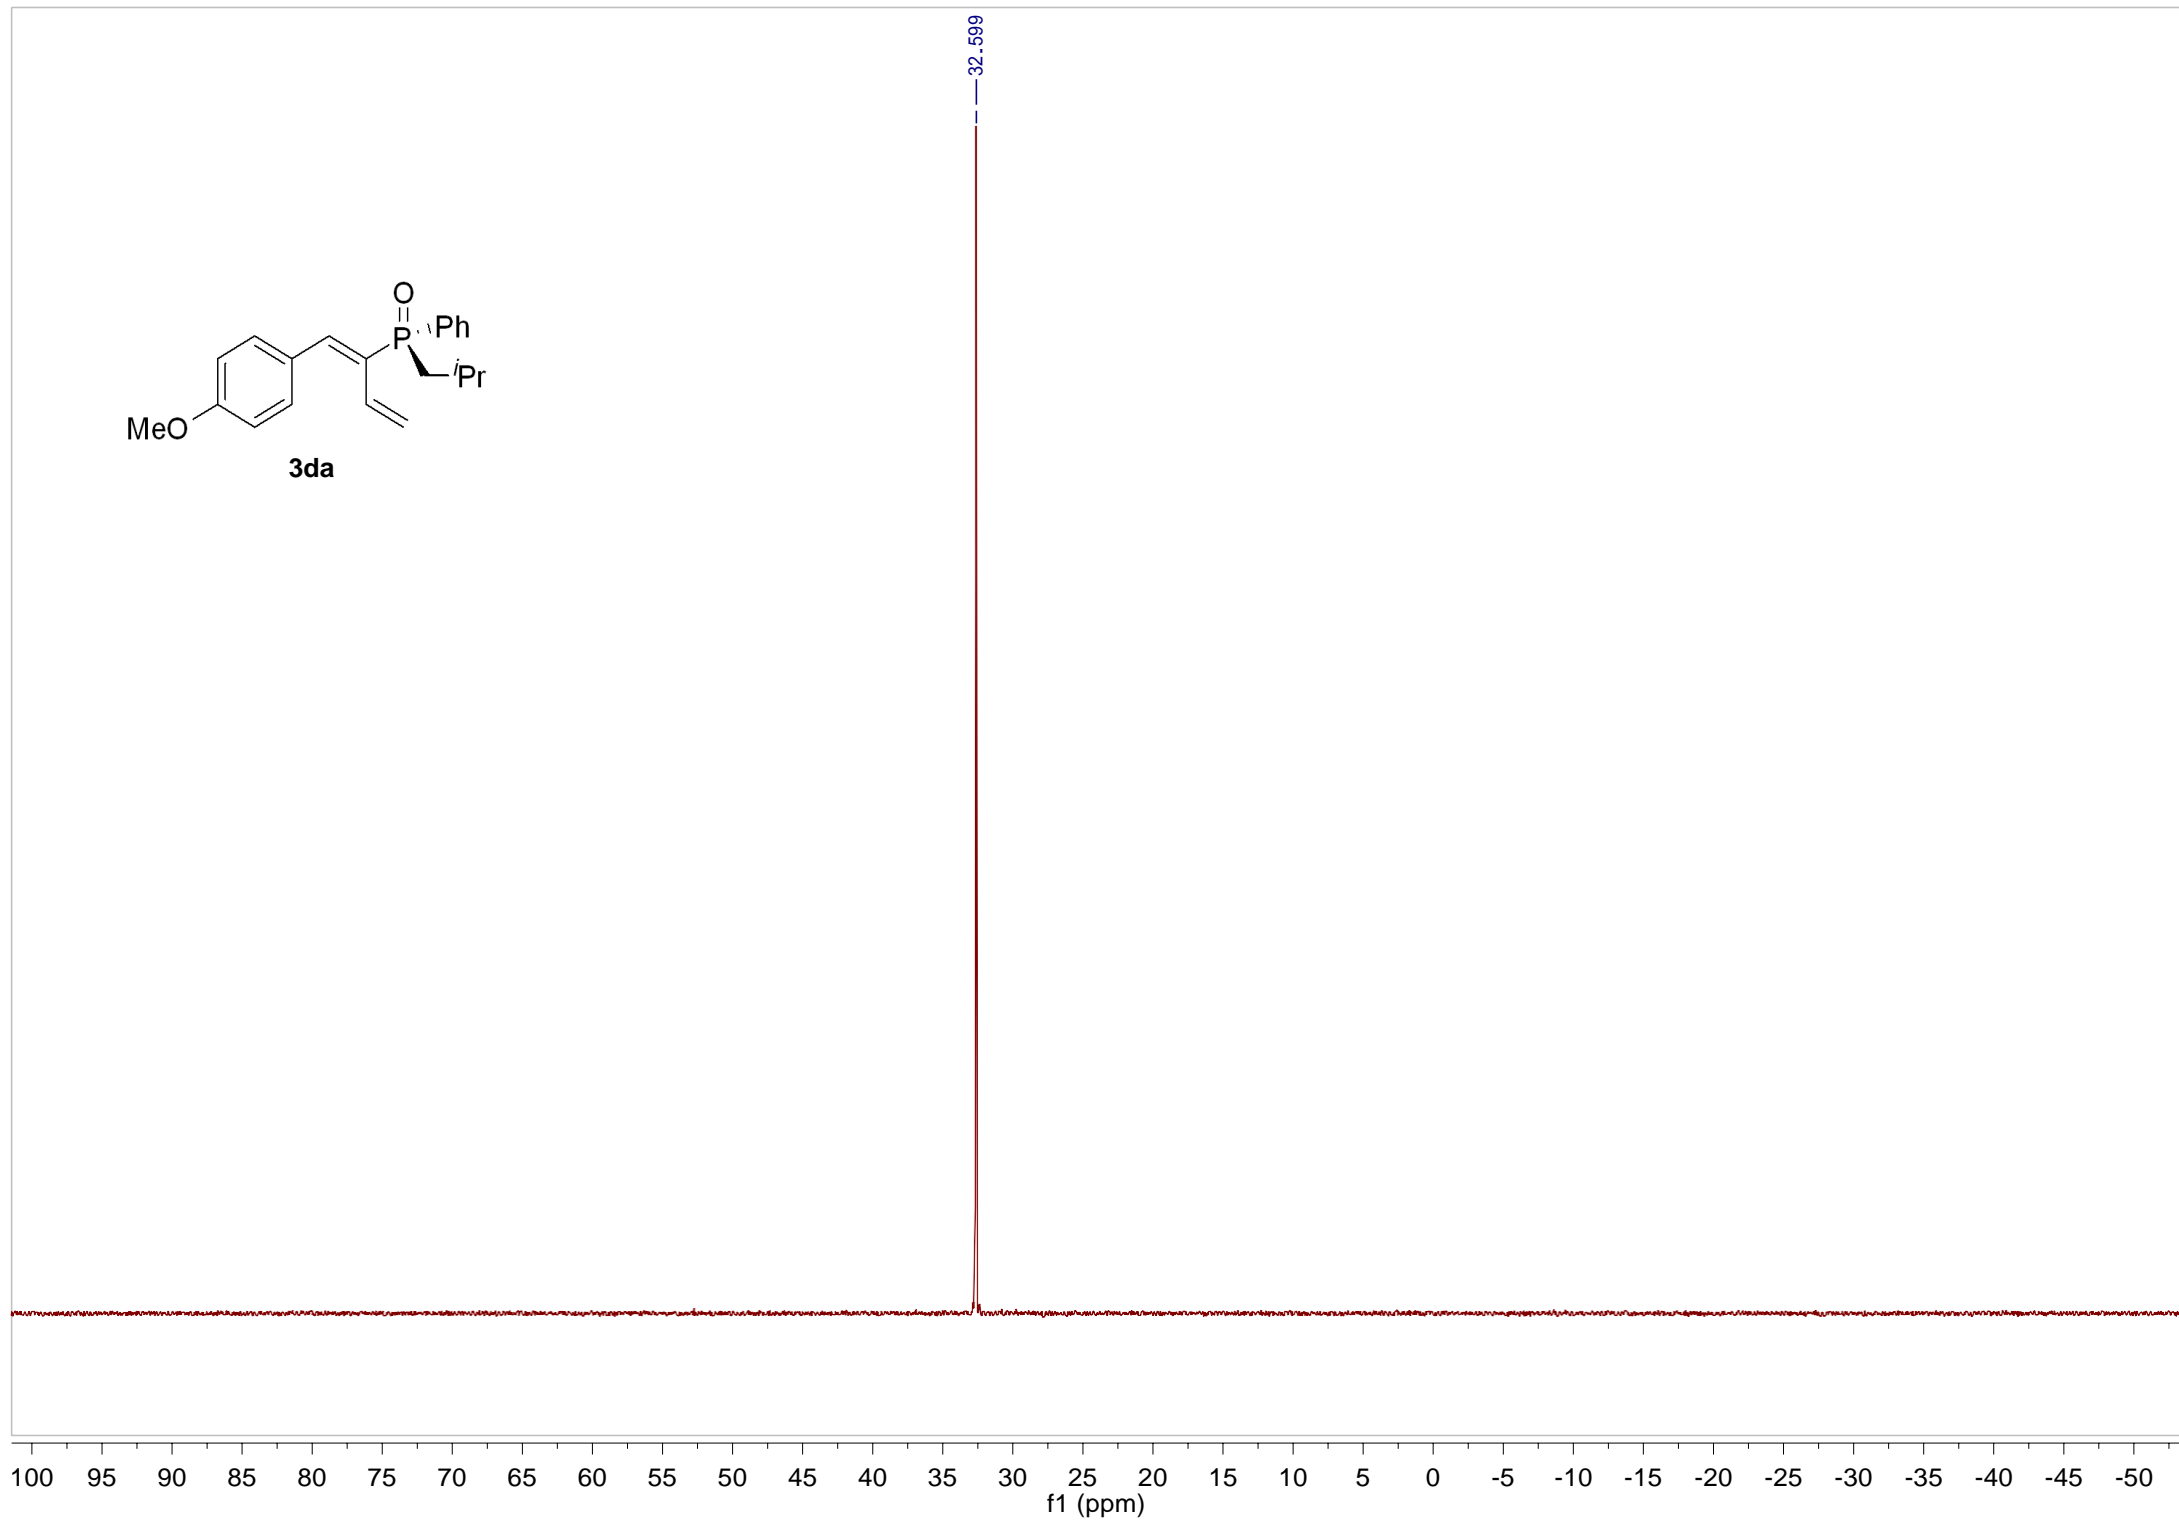



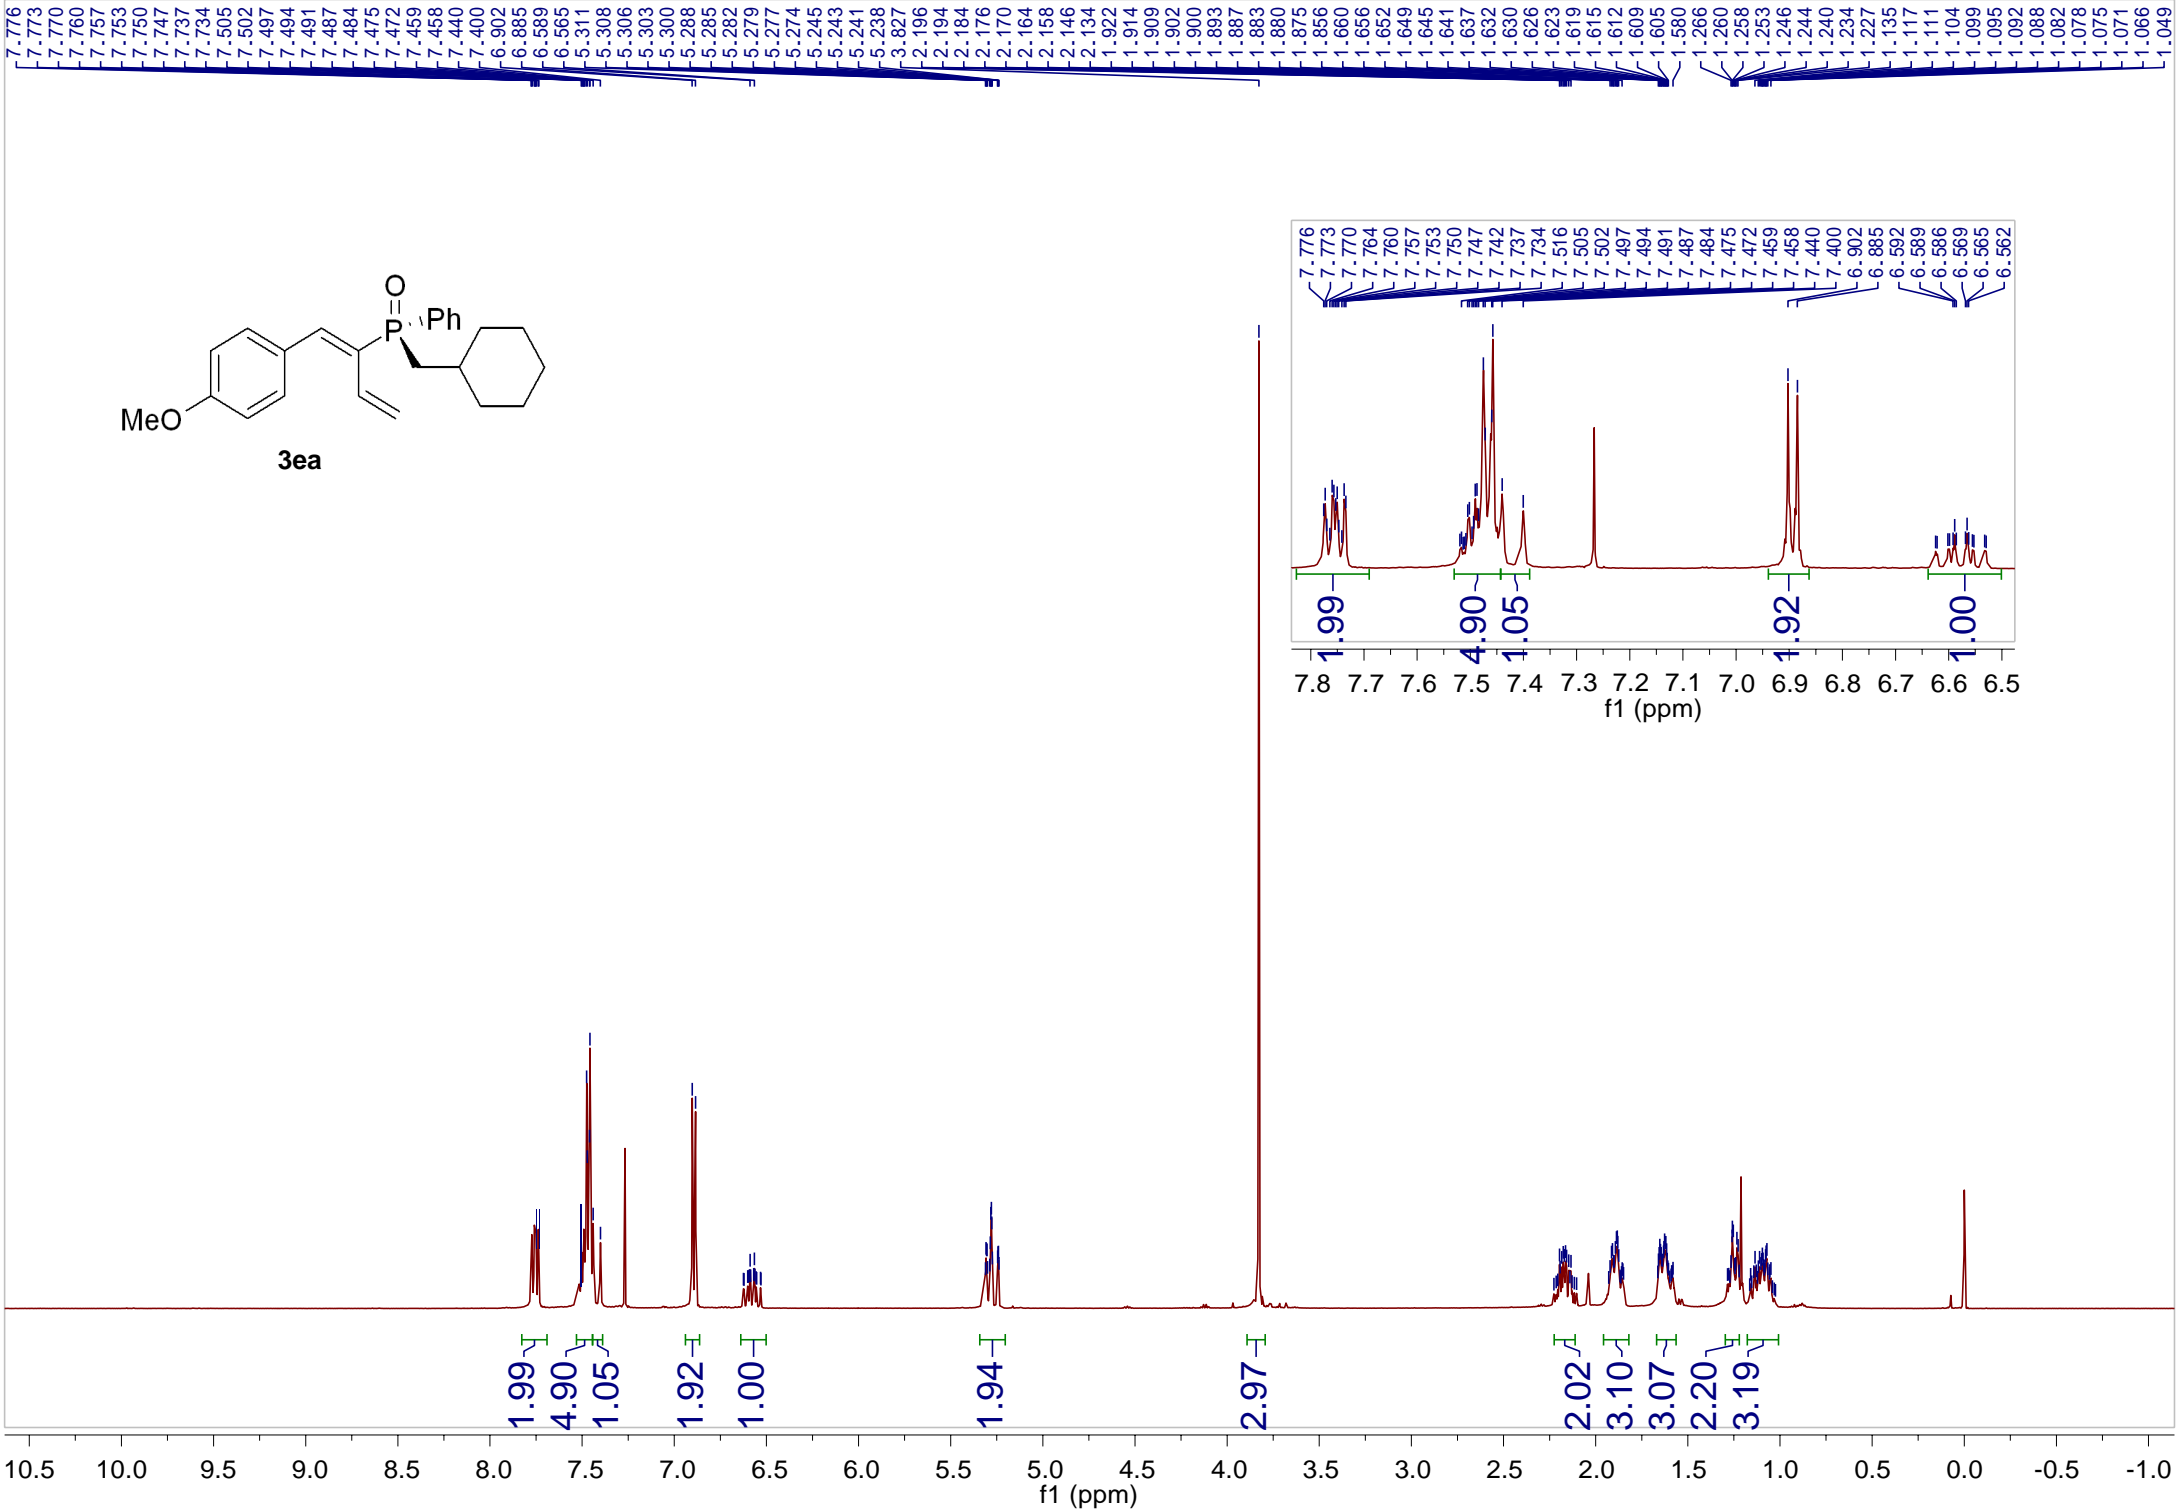

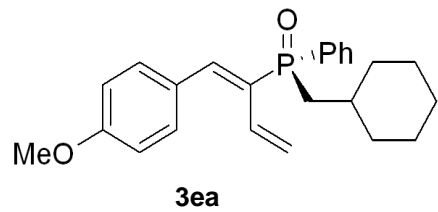

160.014  
 141.747  
 141.685  
 134.523  
 133.755  
 132.168  
 132.094  
 131.795  
 131.394  
 131.373  
 130.778  
 130.705  
 130.508  
 129.791  
 128.511  
 128.421  
 128.307  
 128.174  
 120.387  
 120.341  
 113.717

55.287  
 35.235  
 35.172  
 35.038  
 34.972  
 34.416  
 33.844  
 32.339  
 32.310  
 26.076  
 25.967

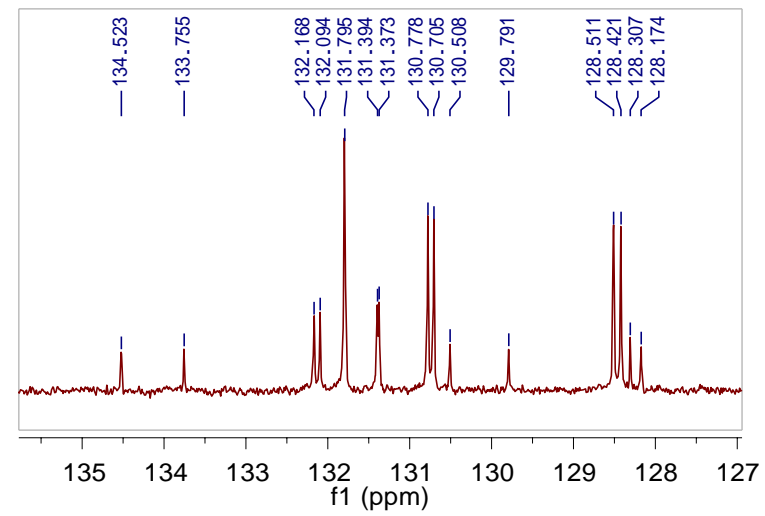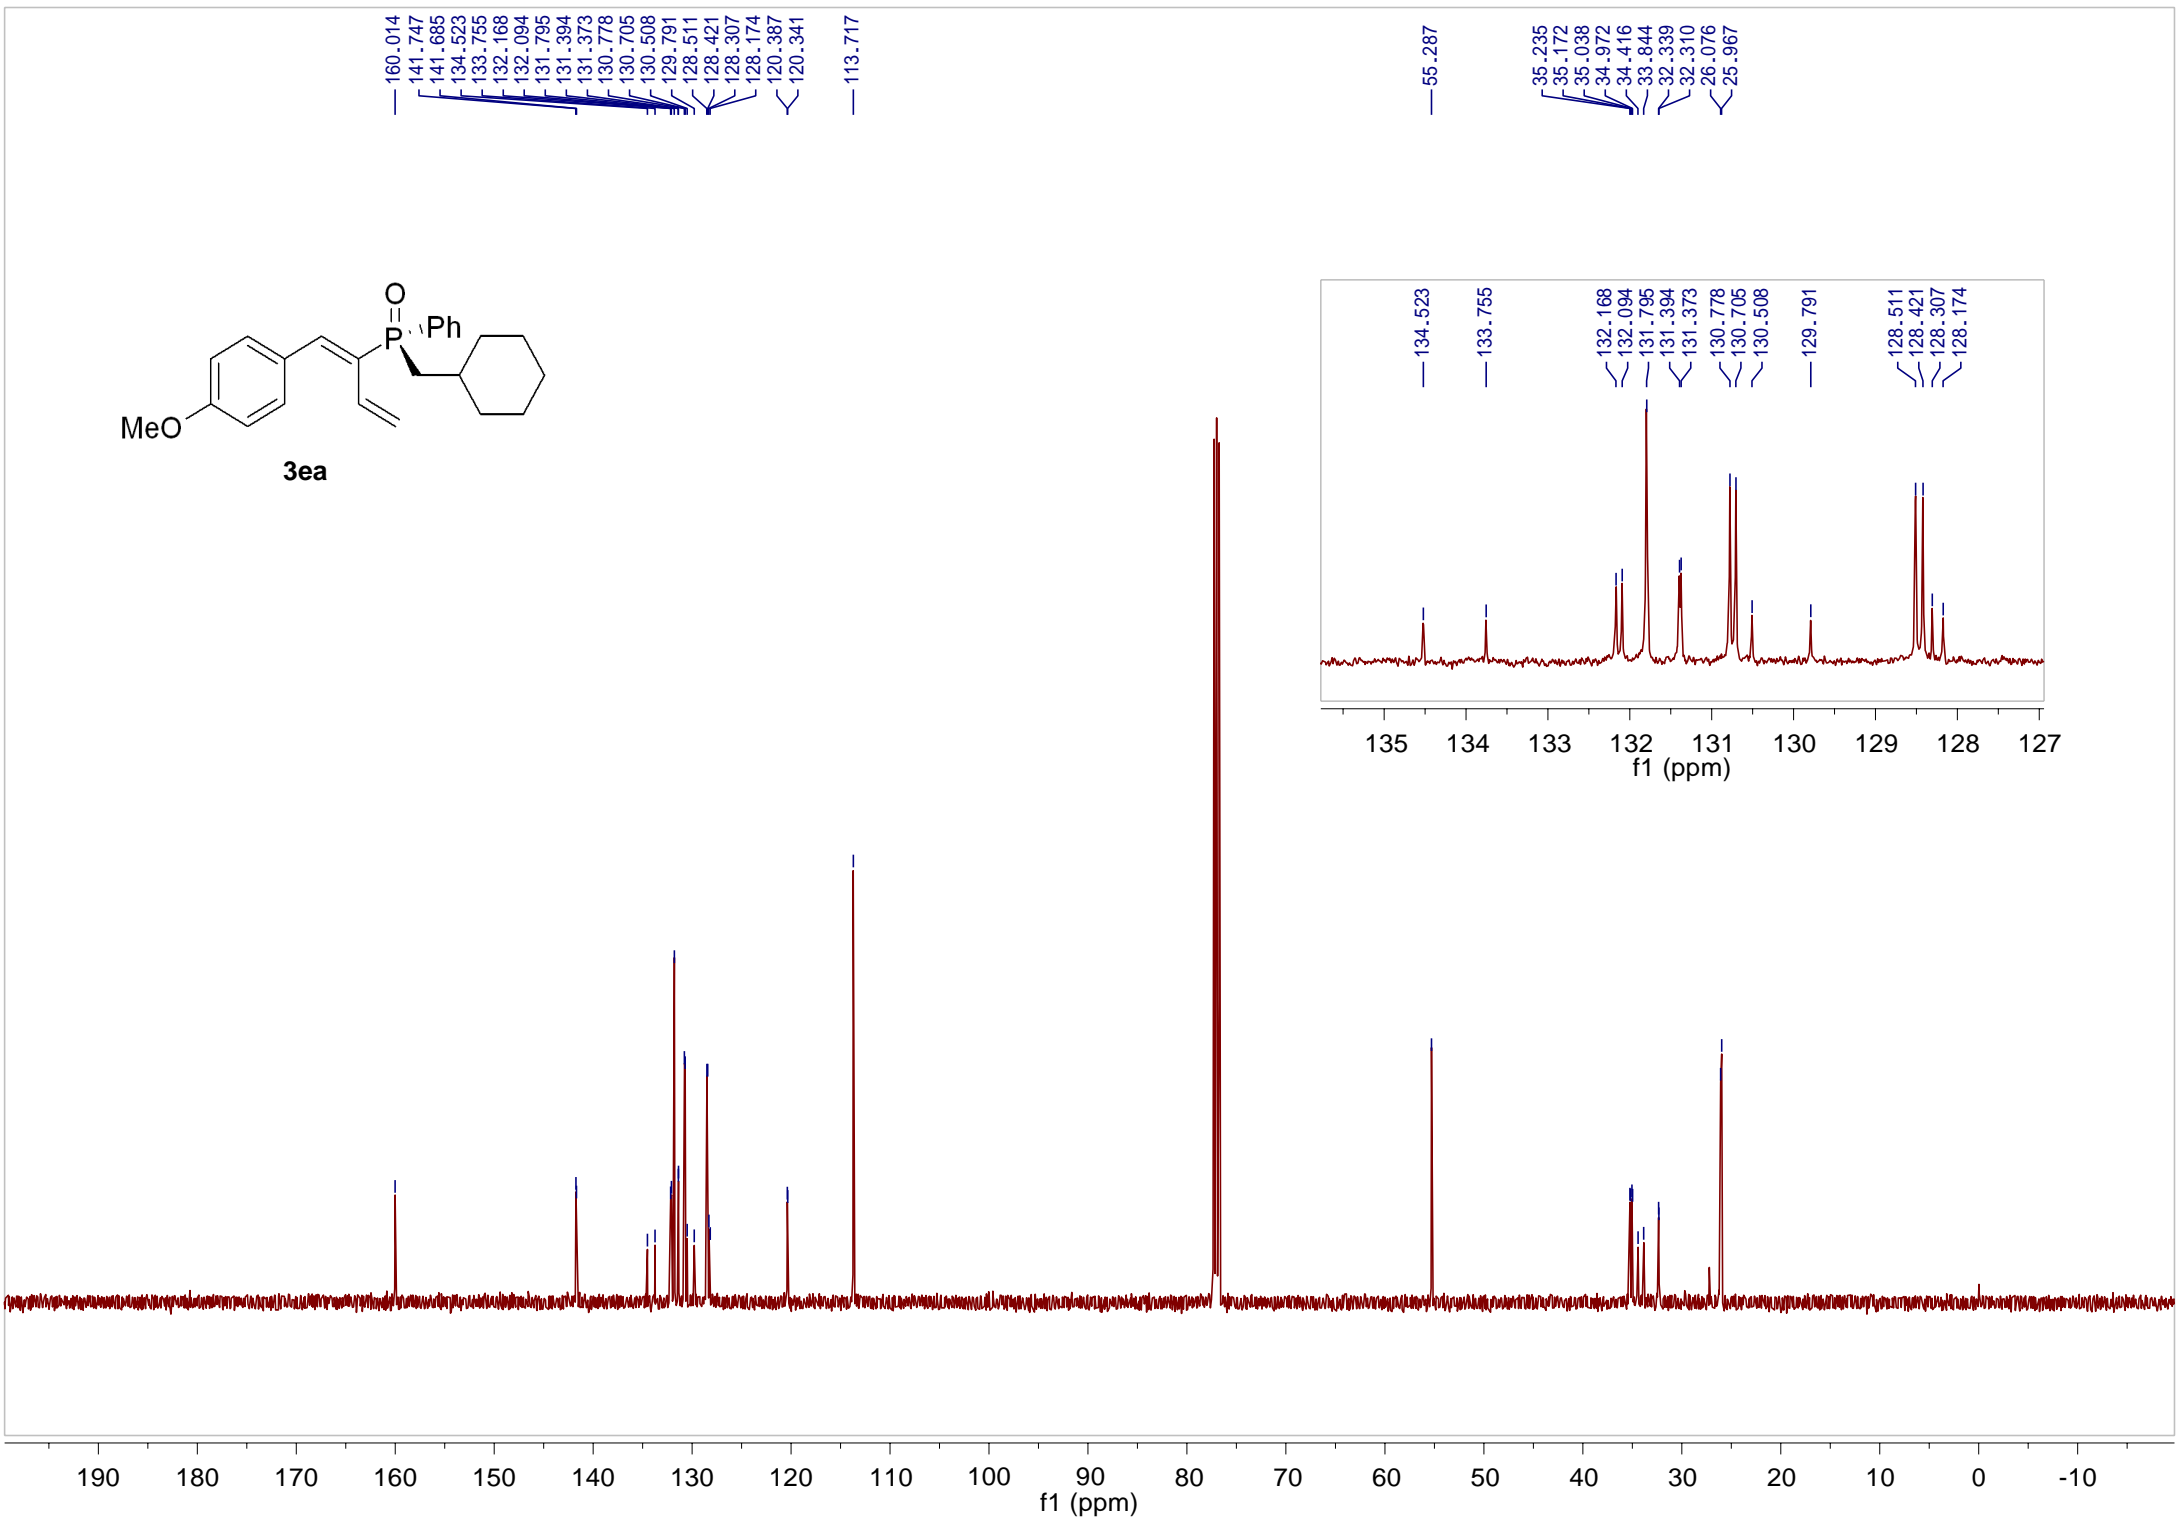

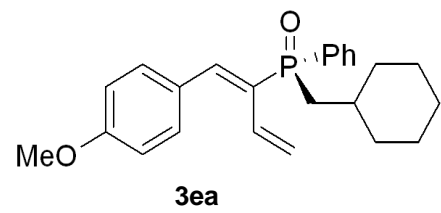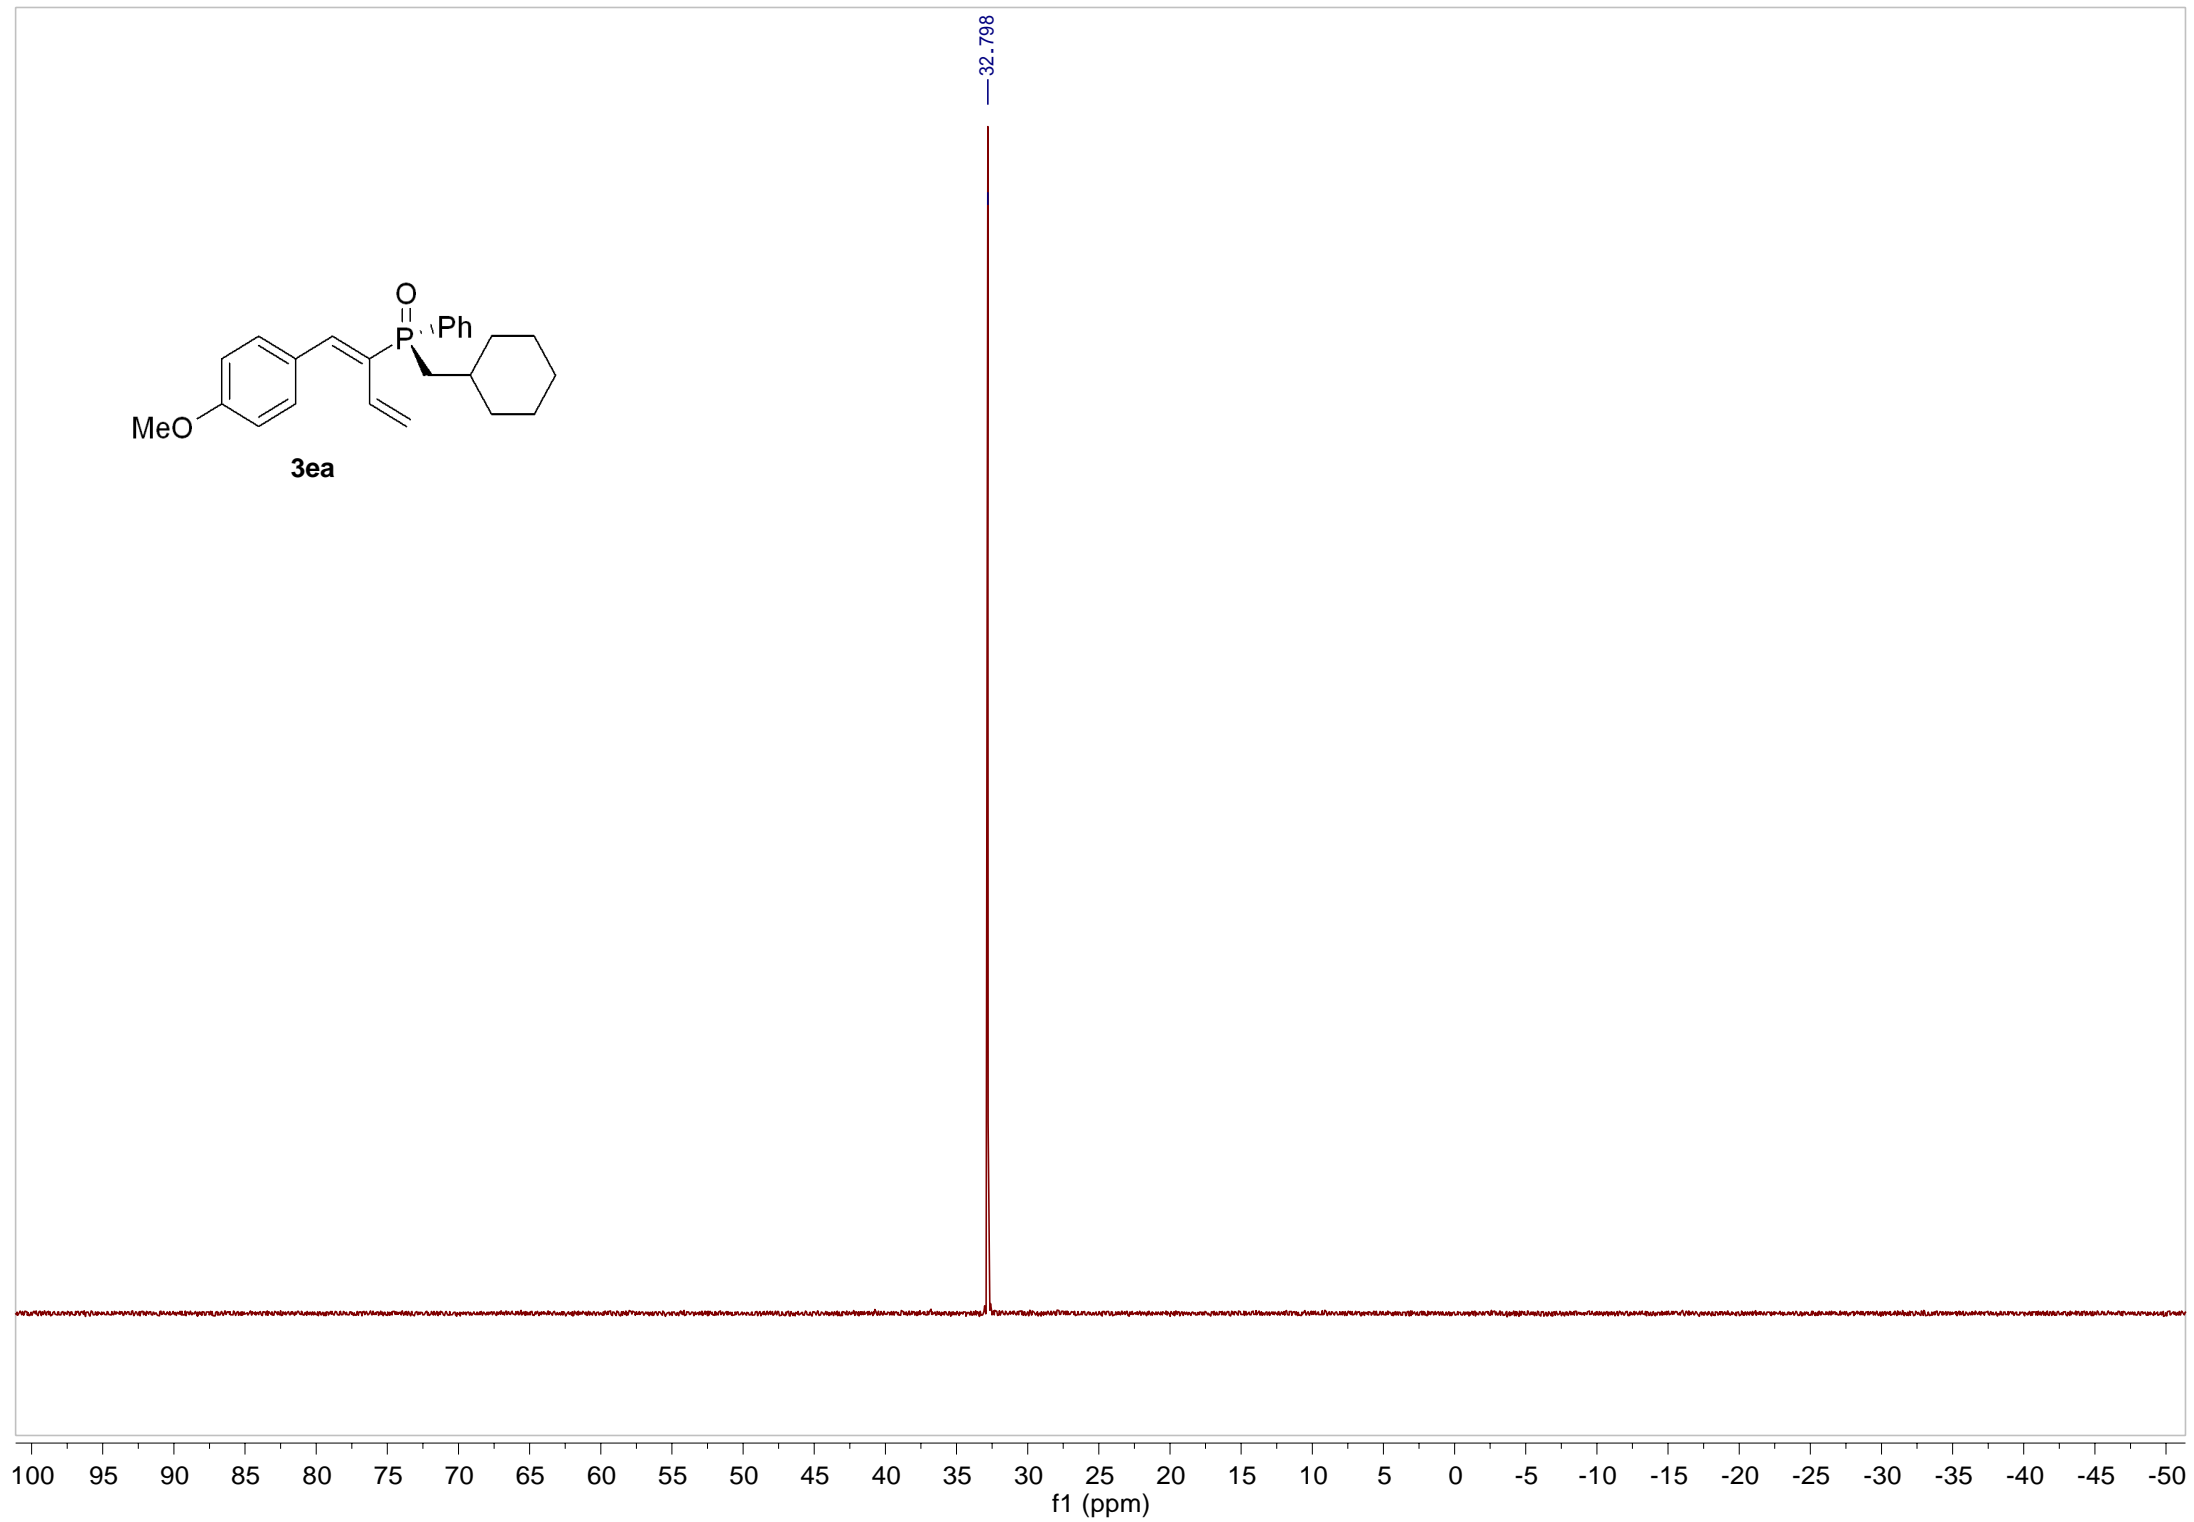

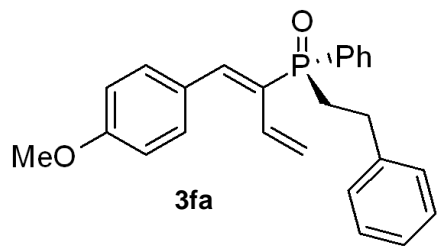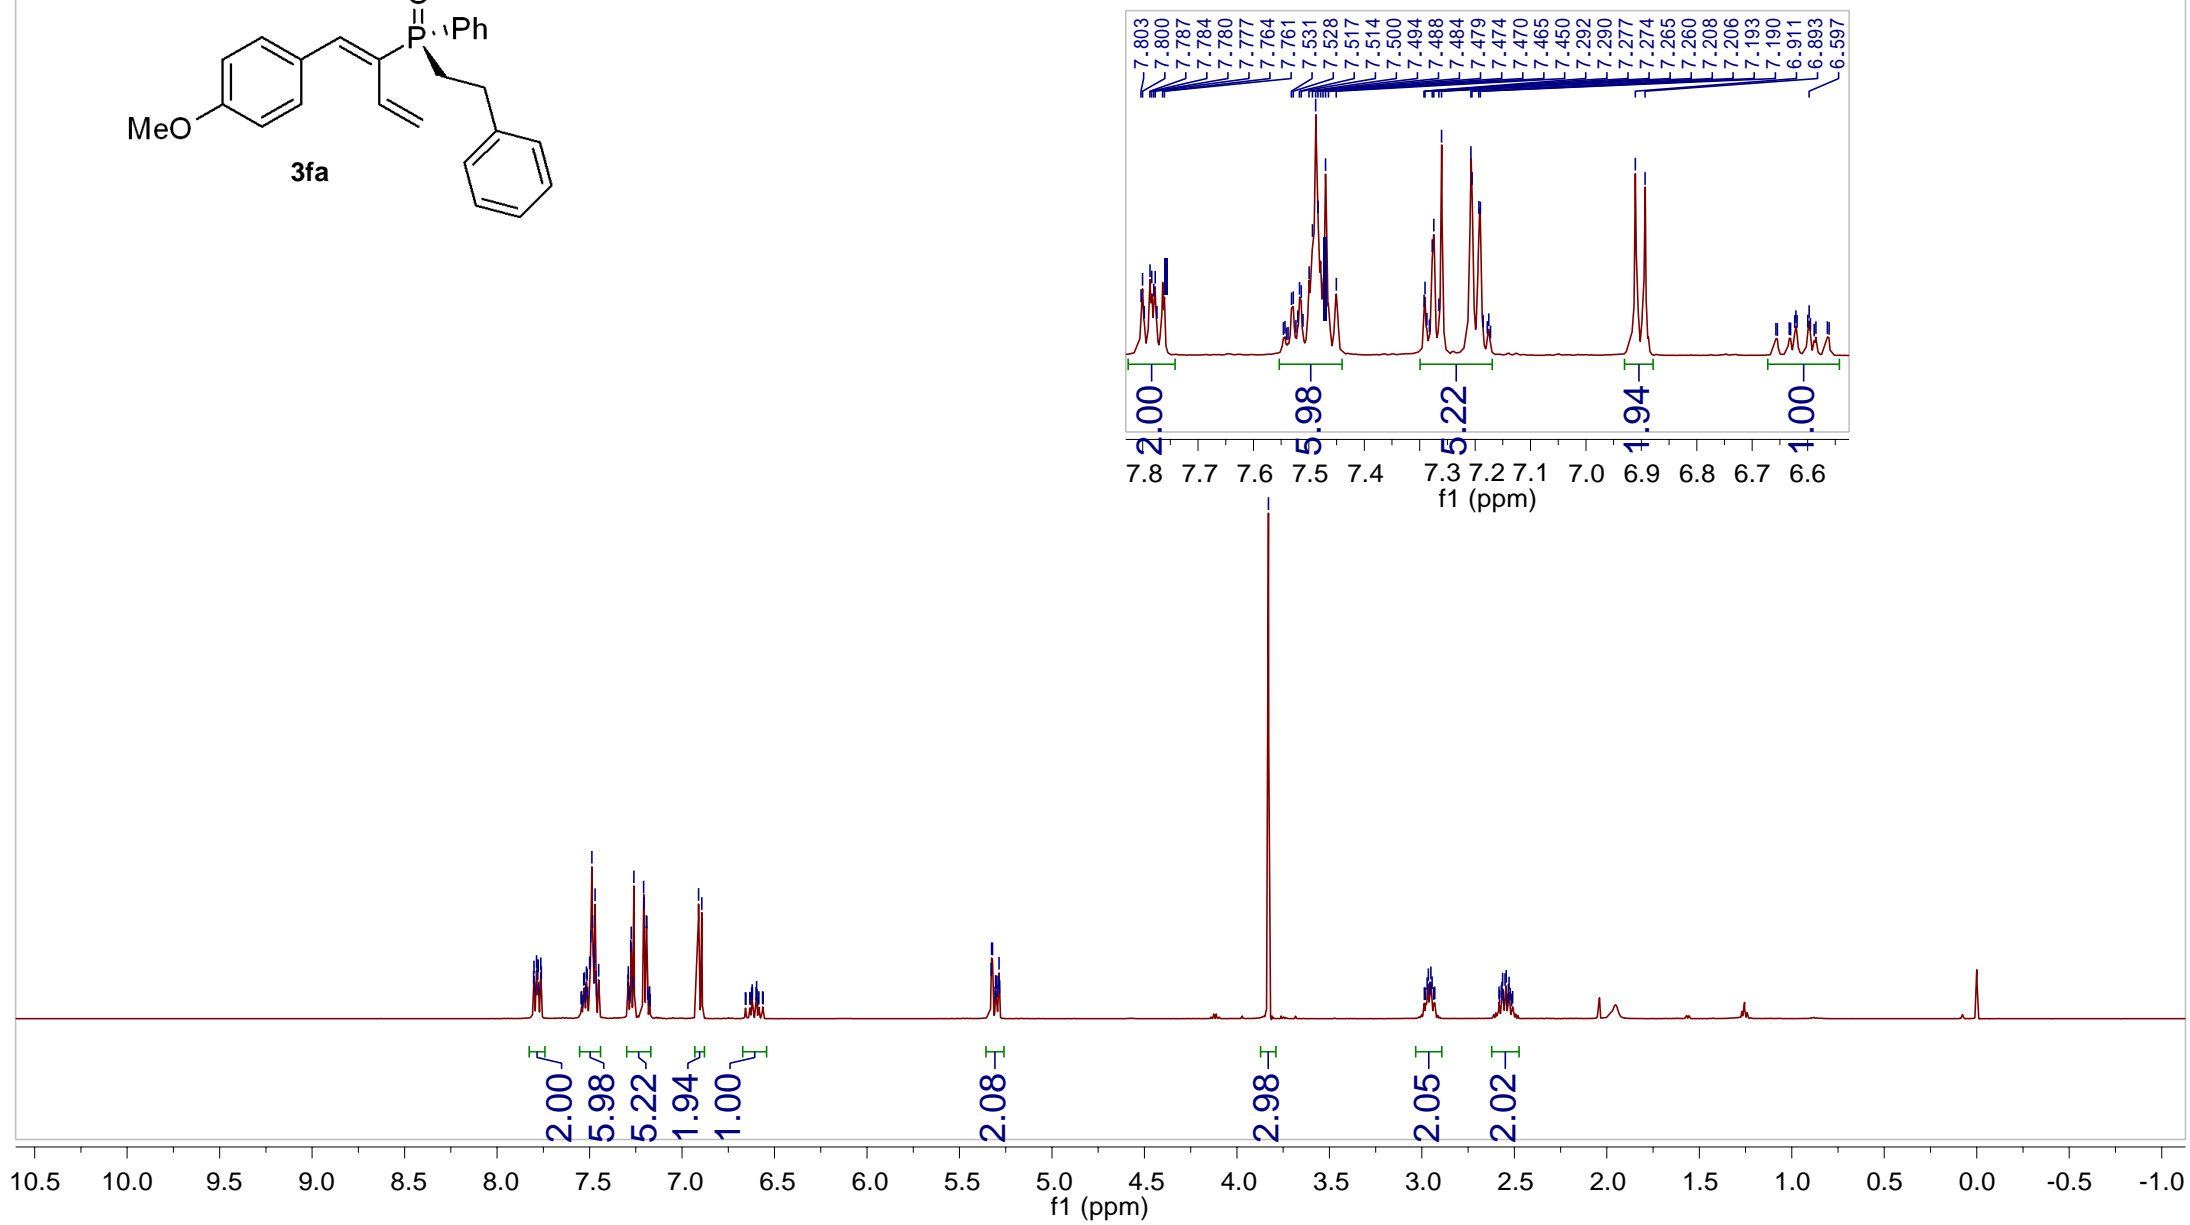

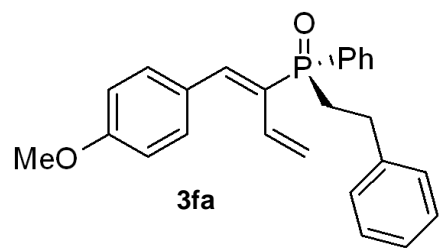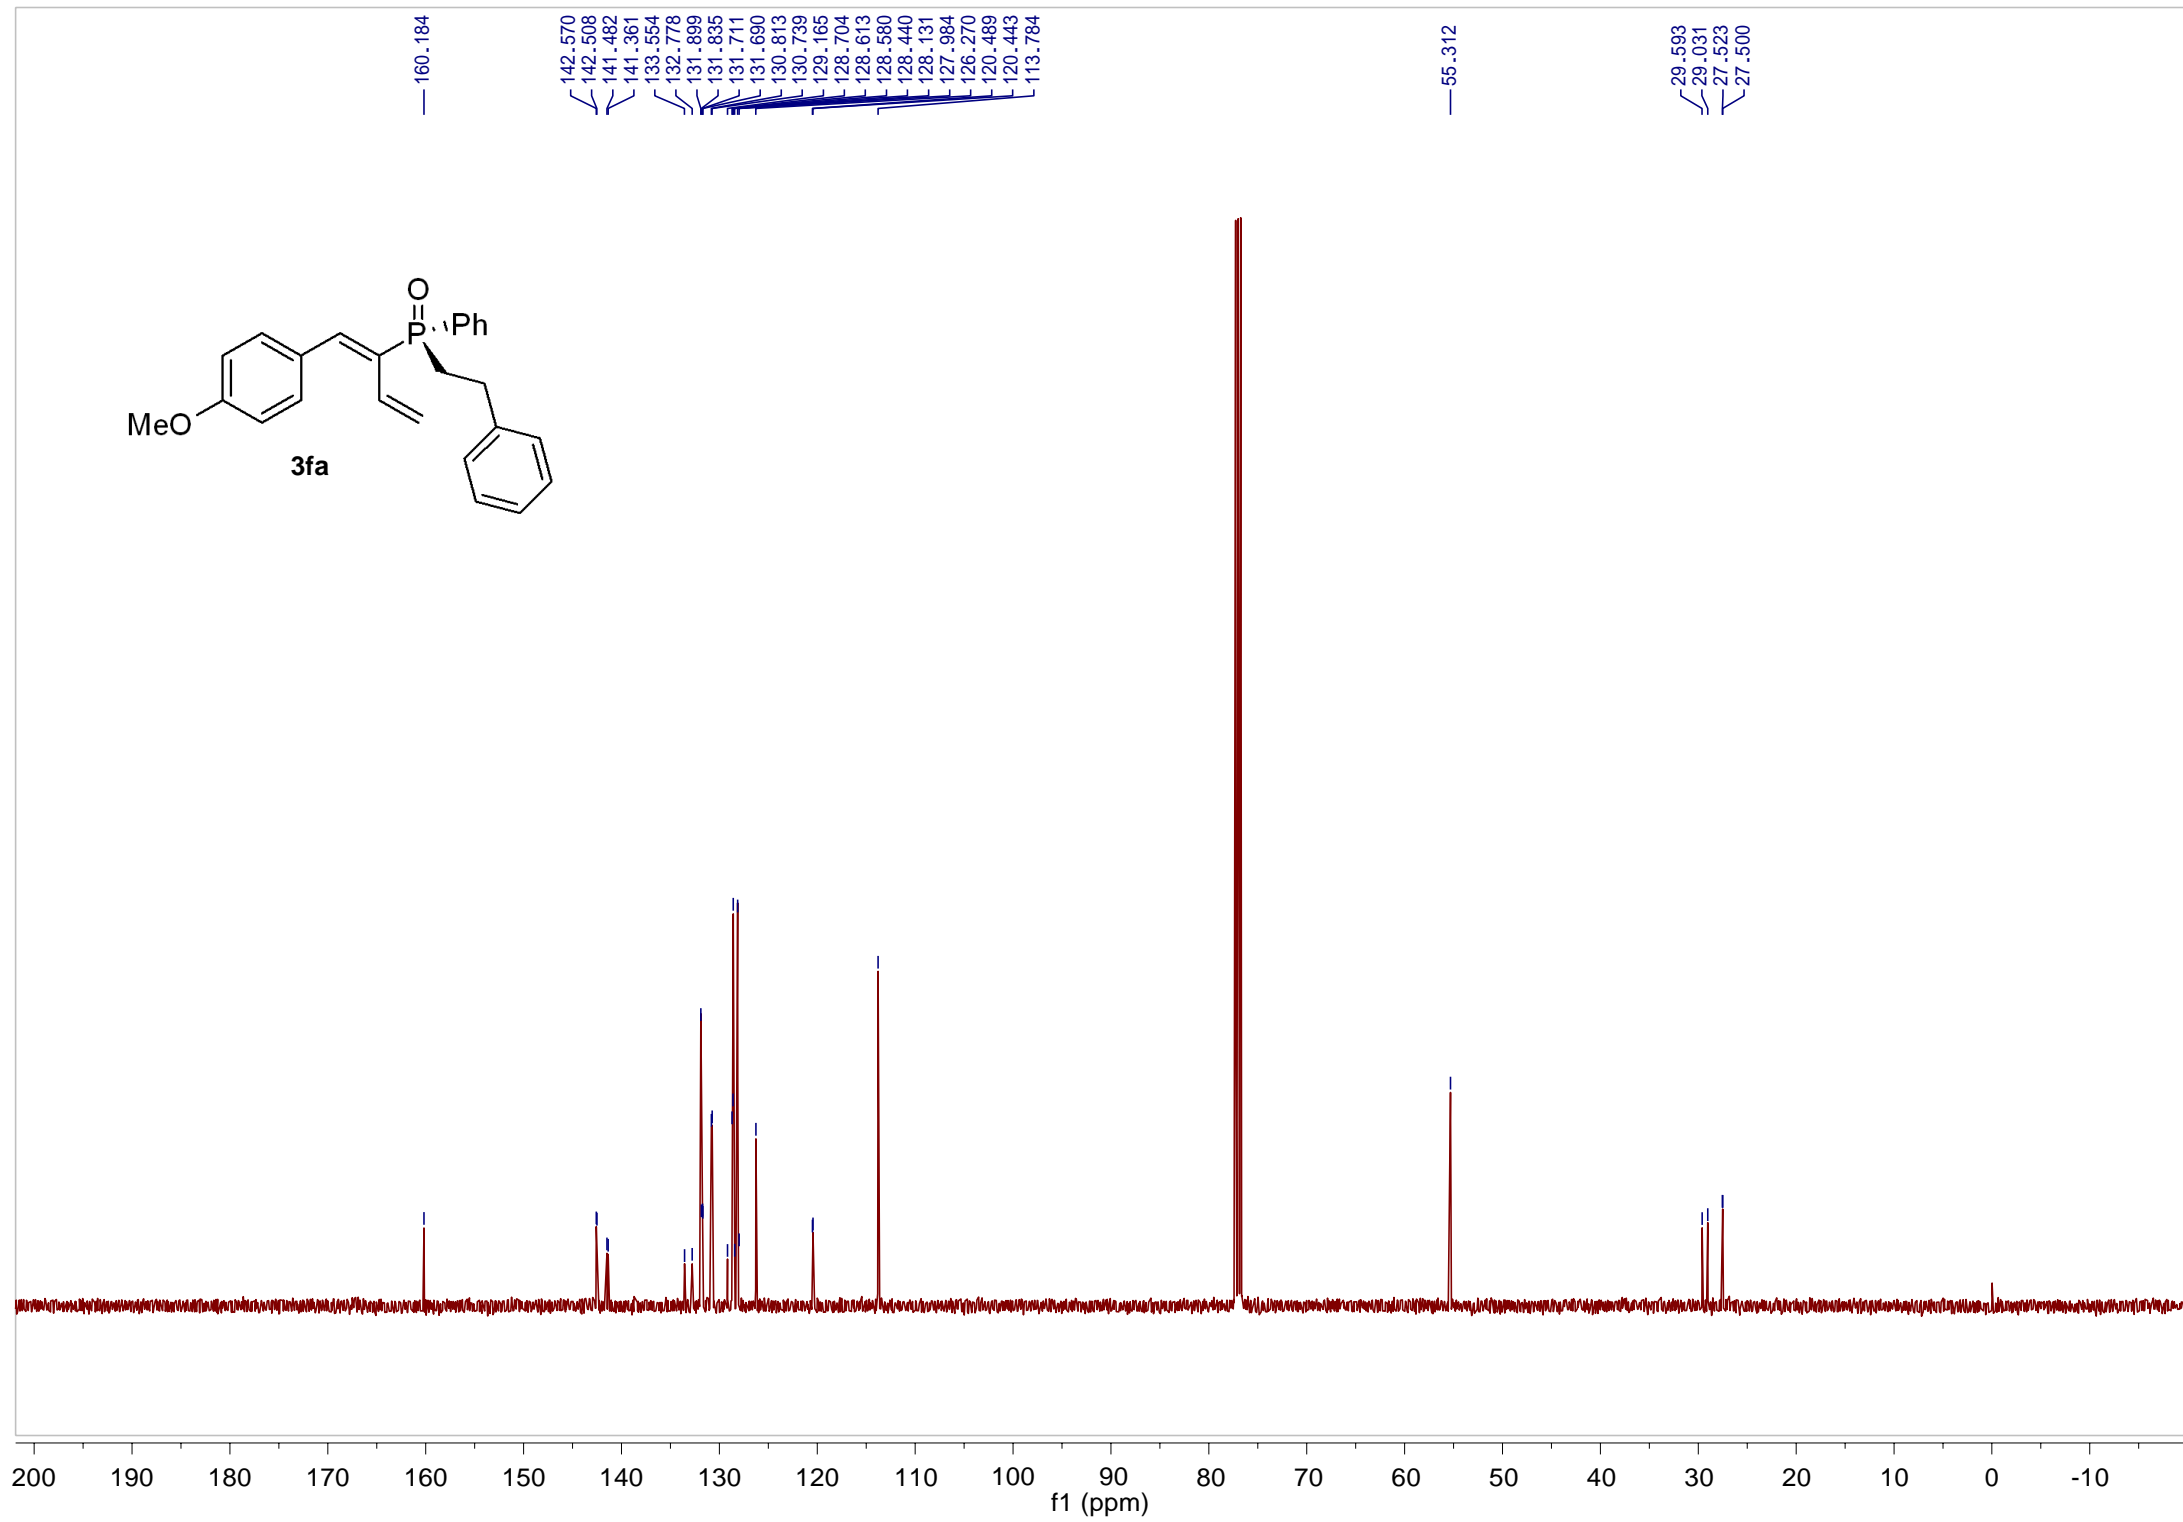

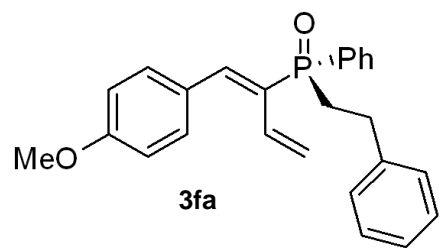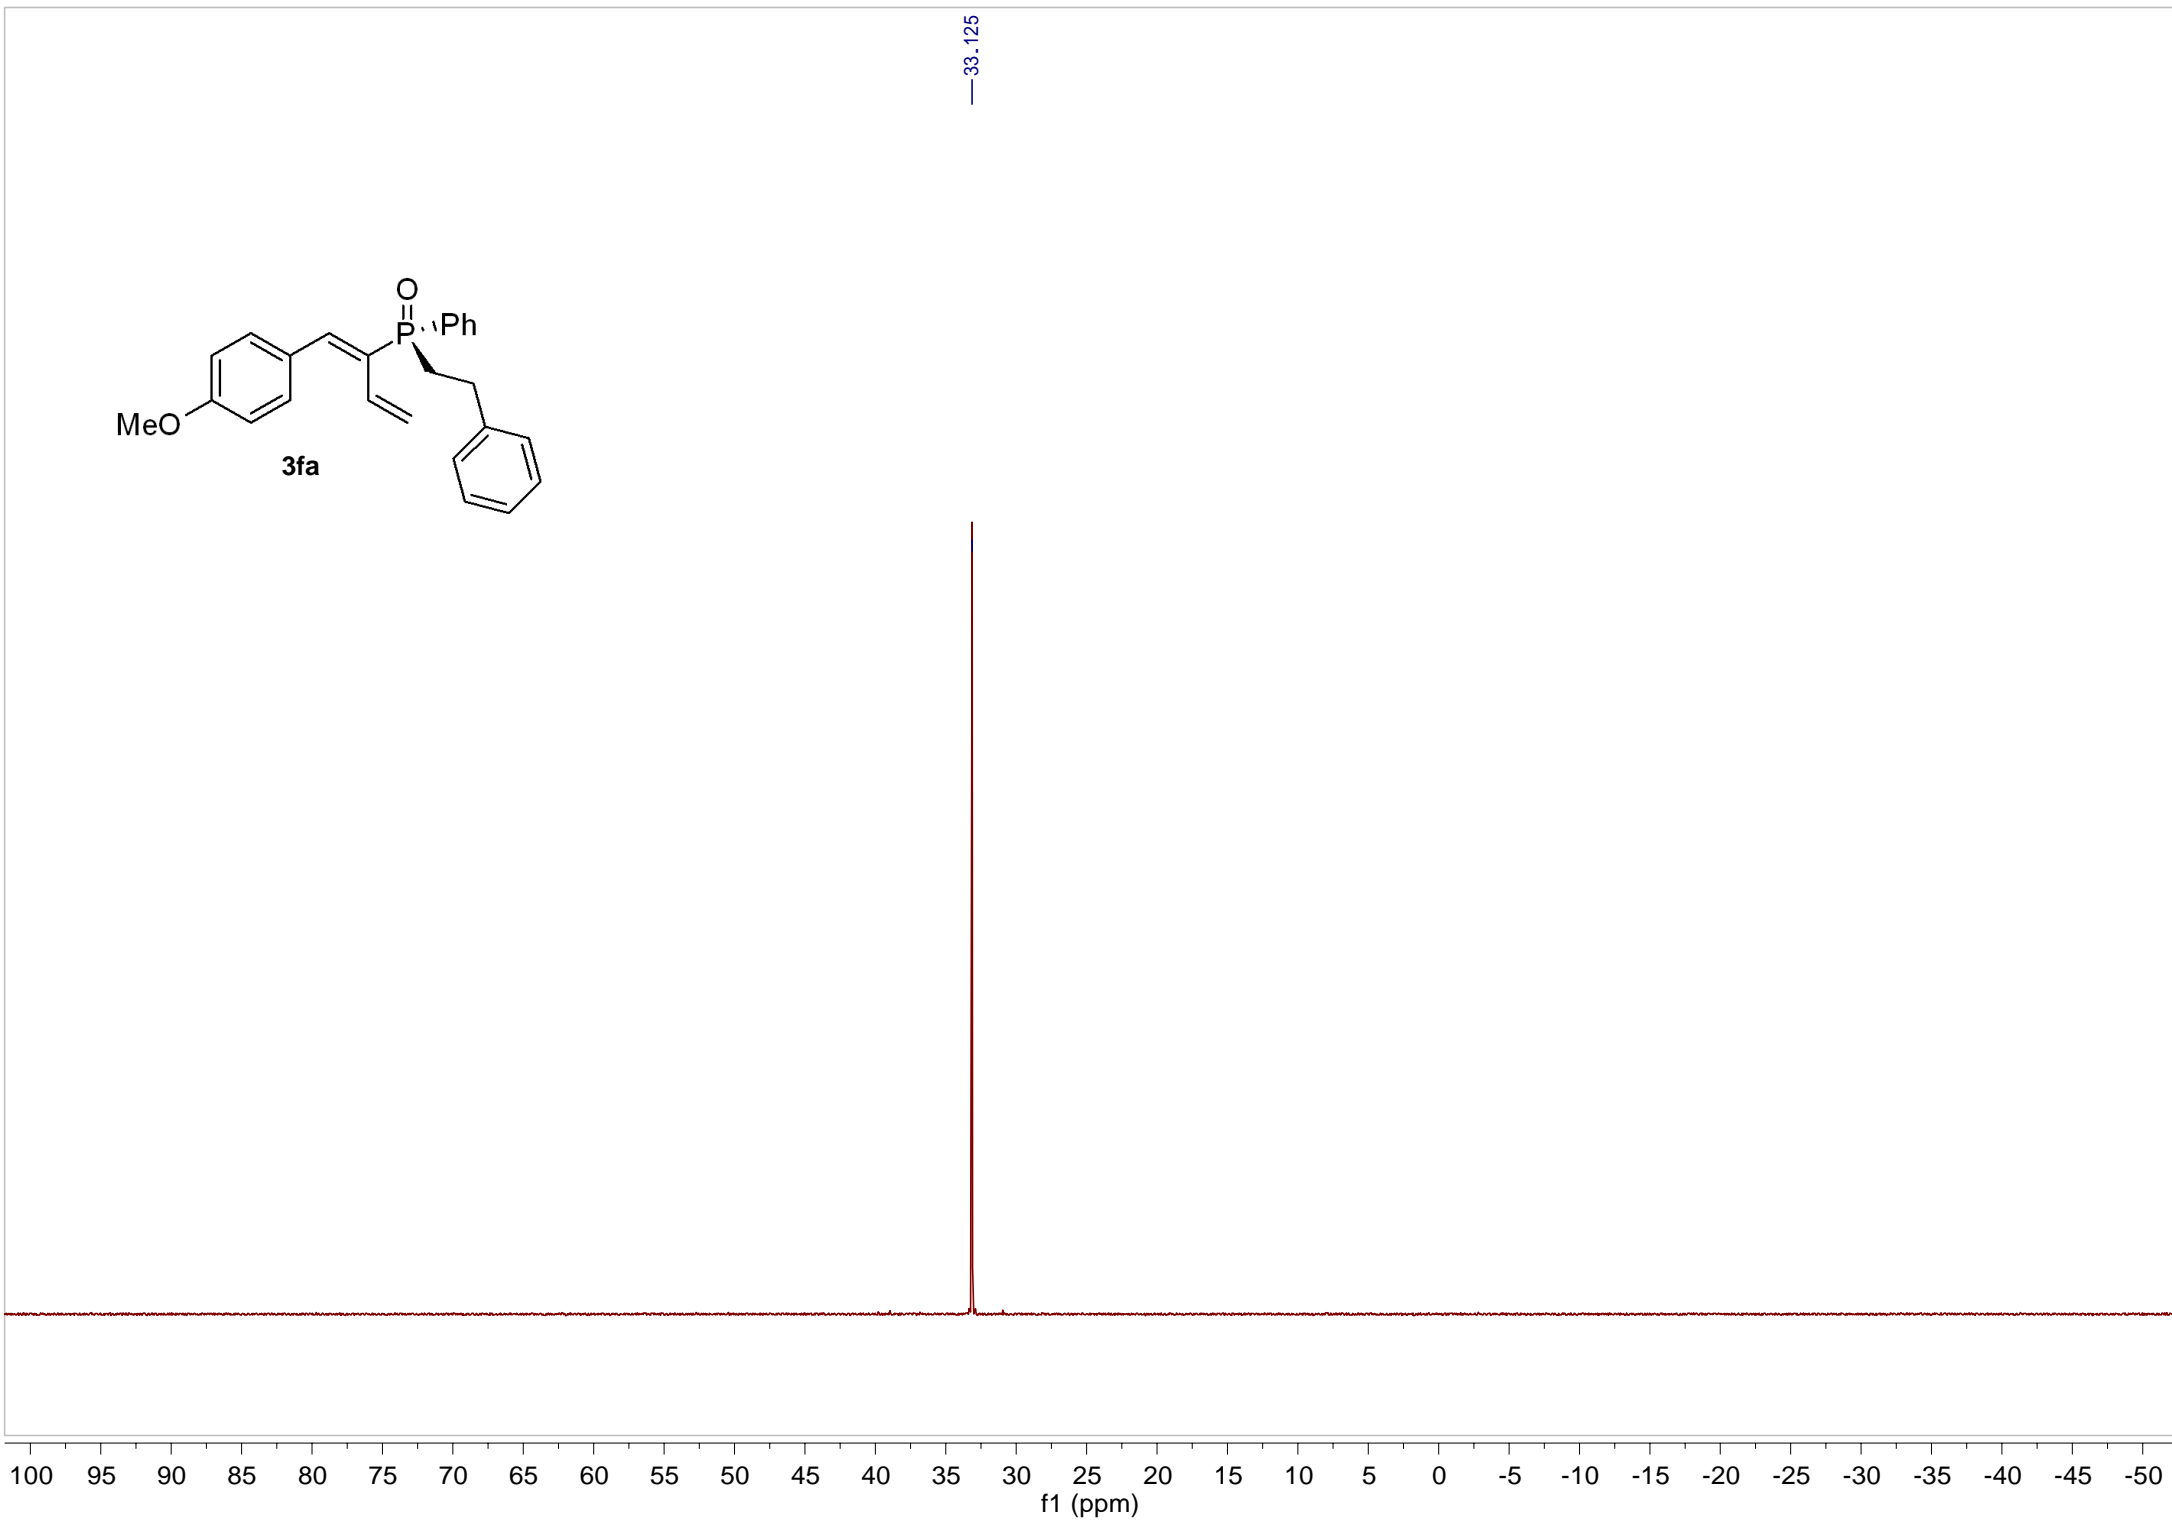

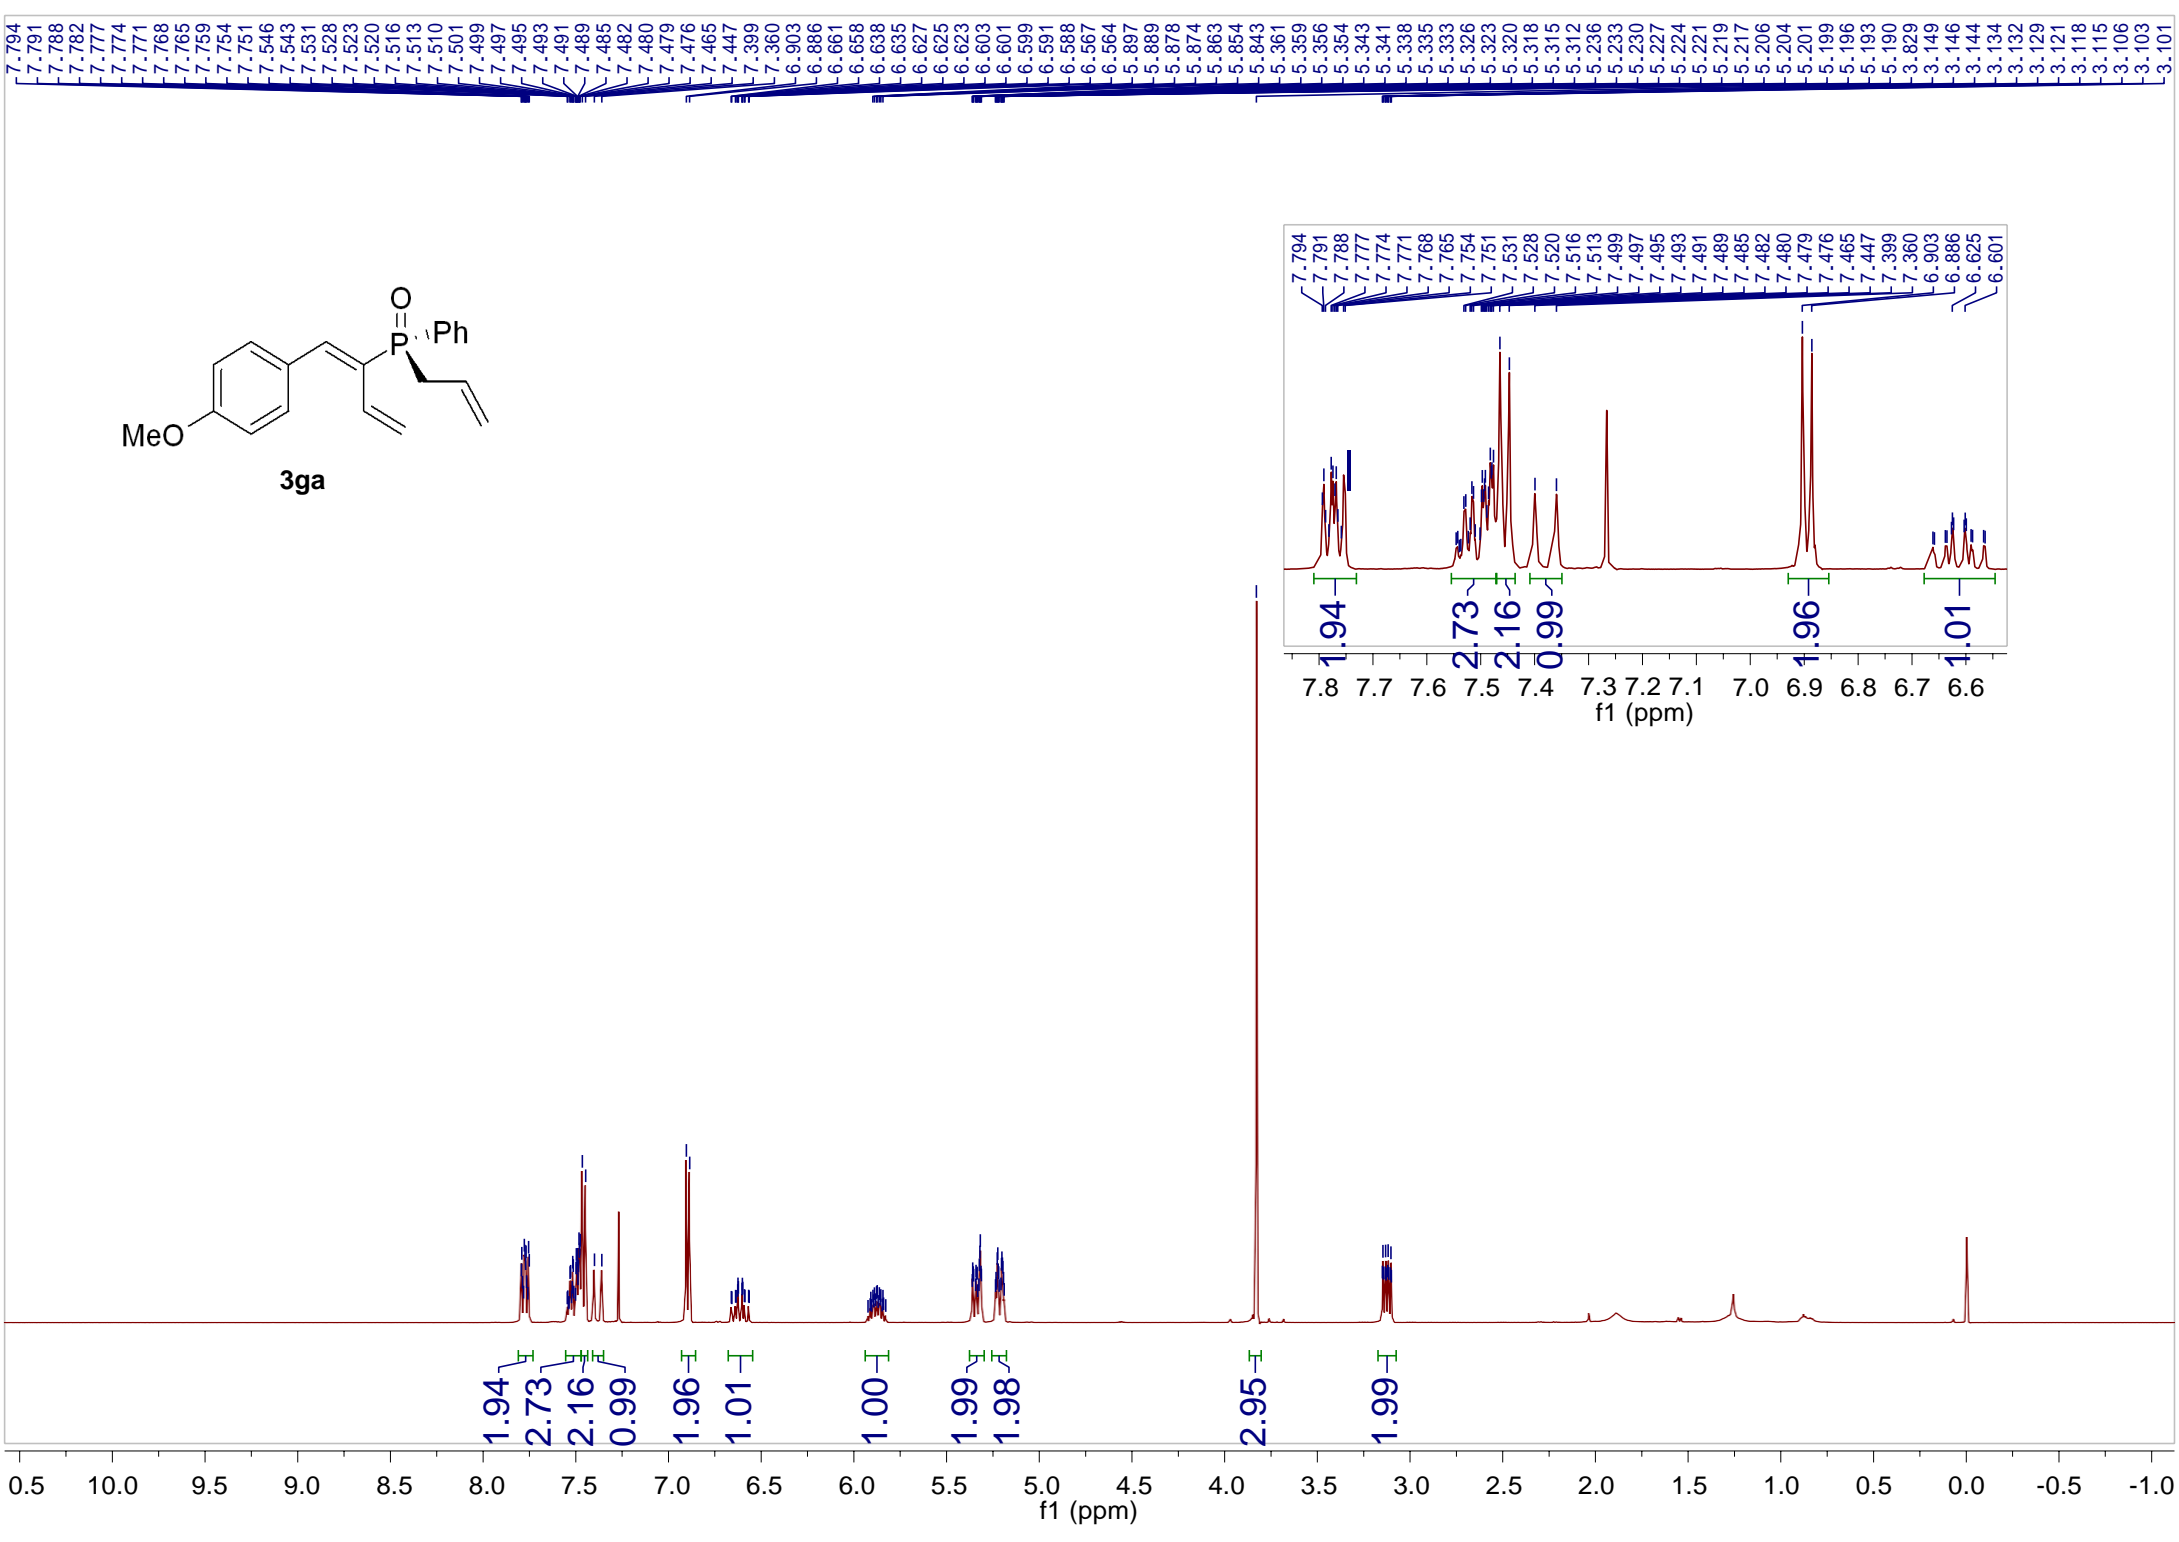

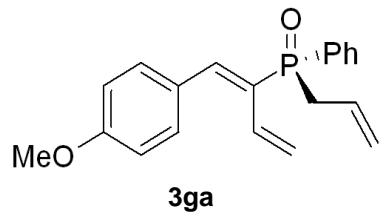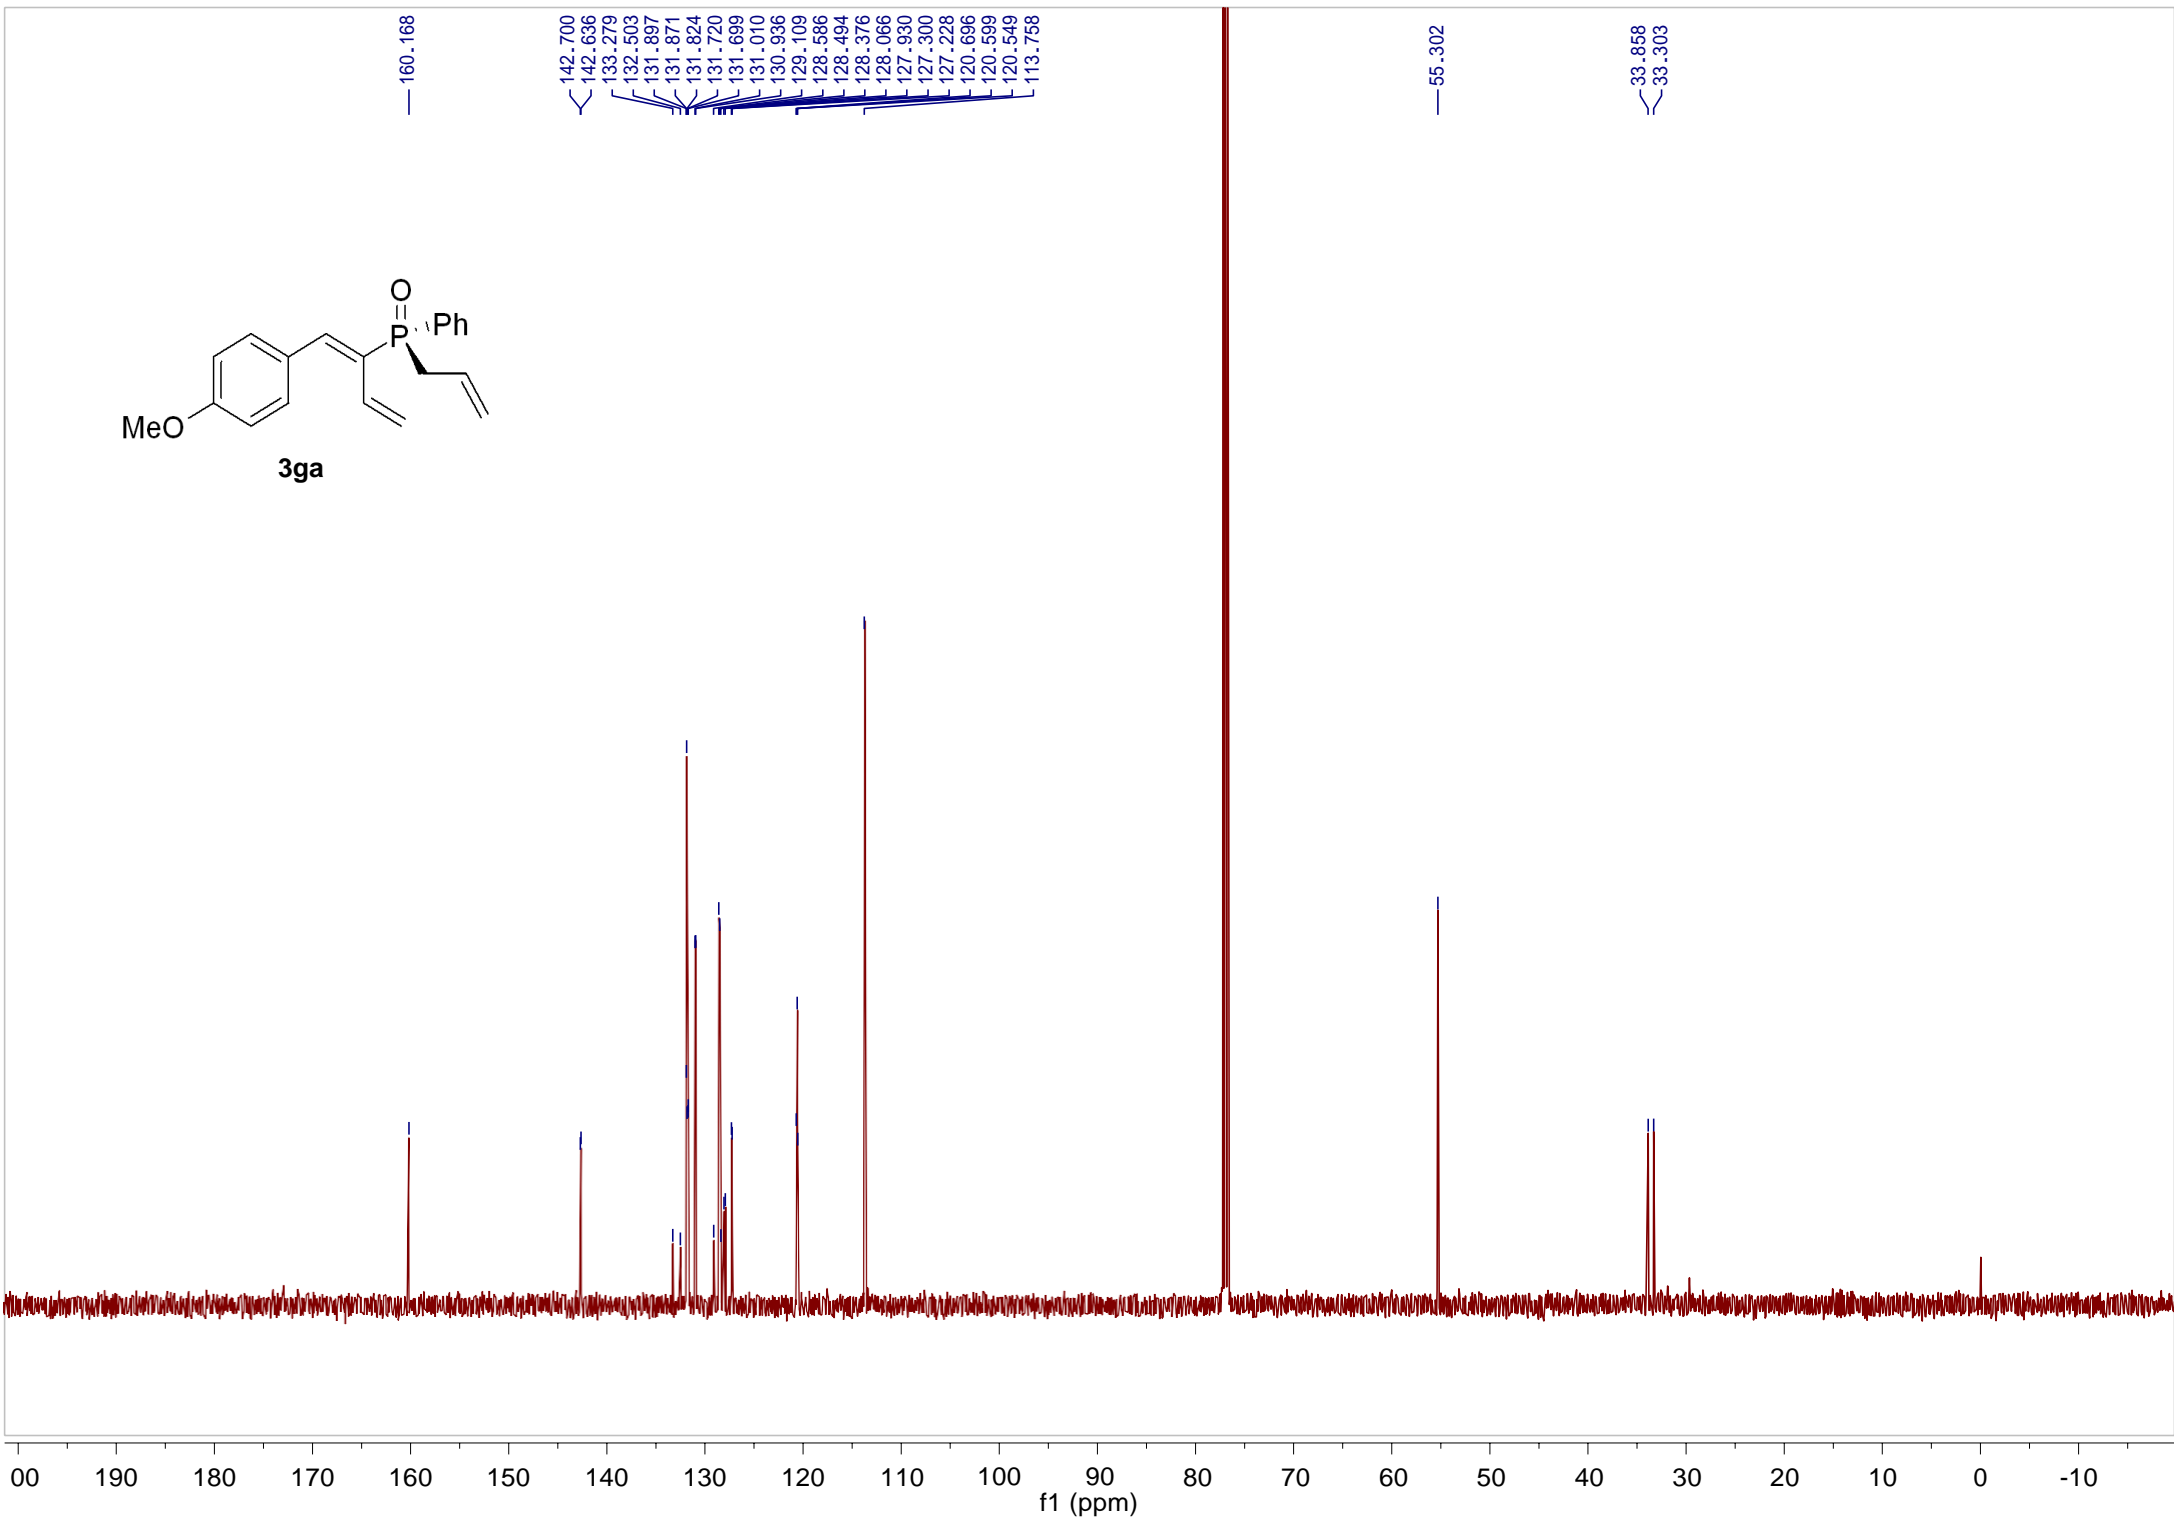



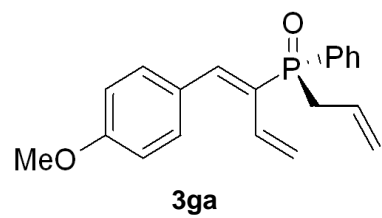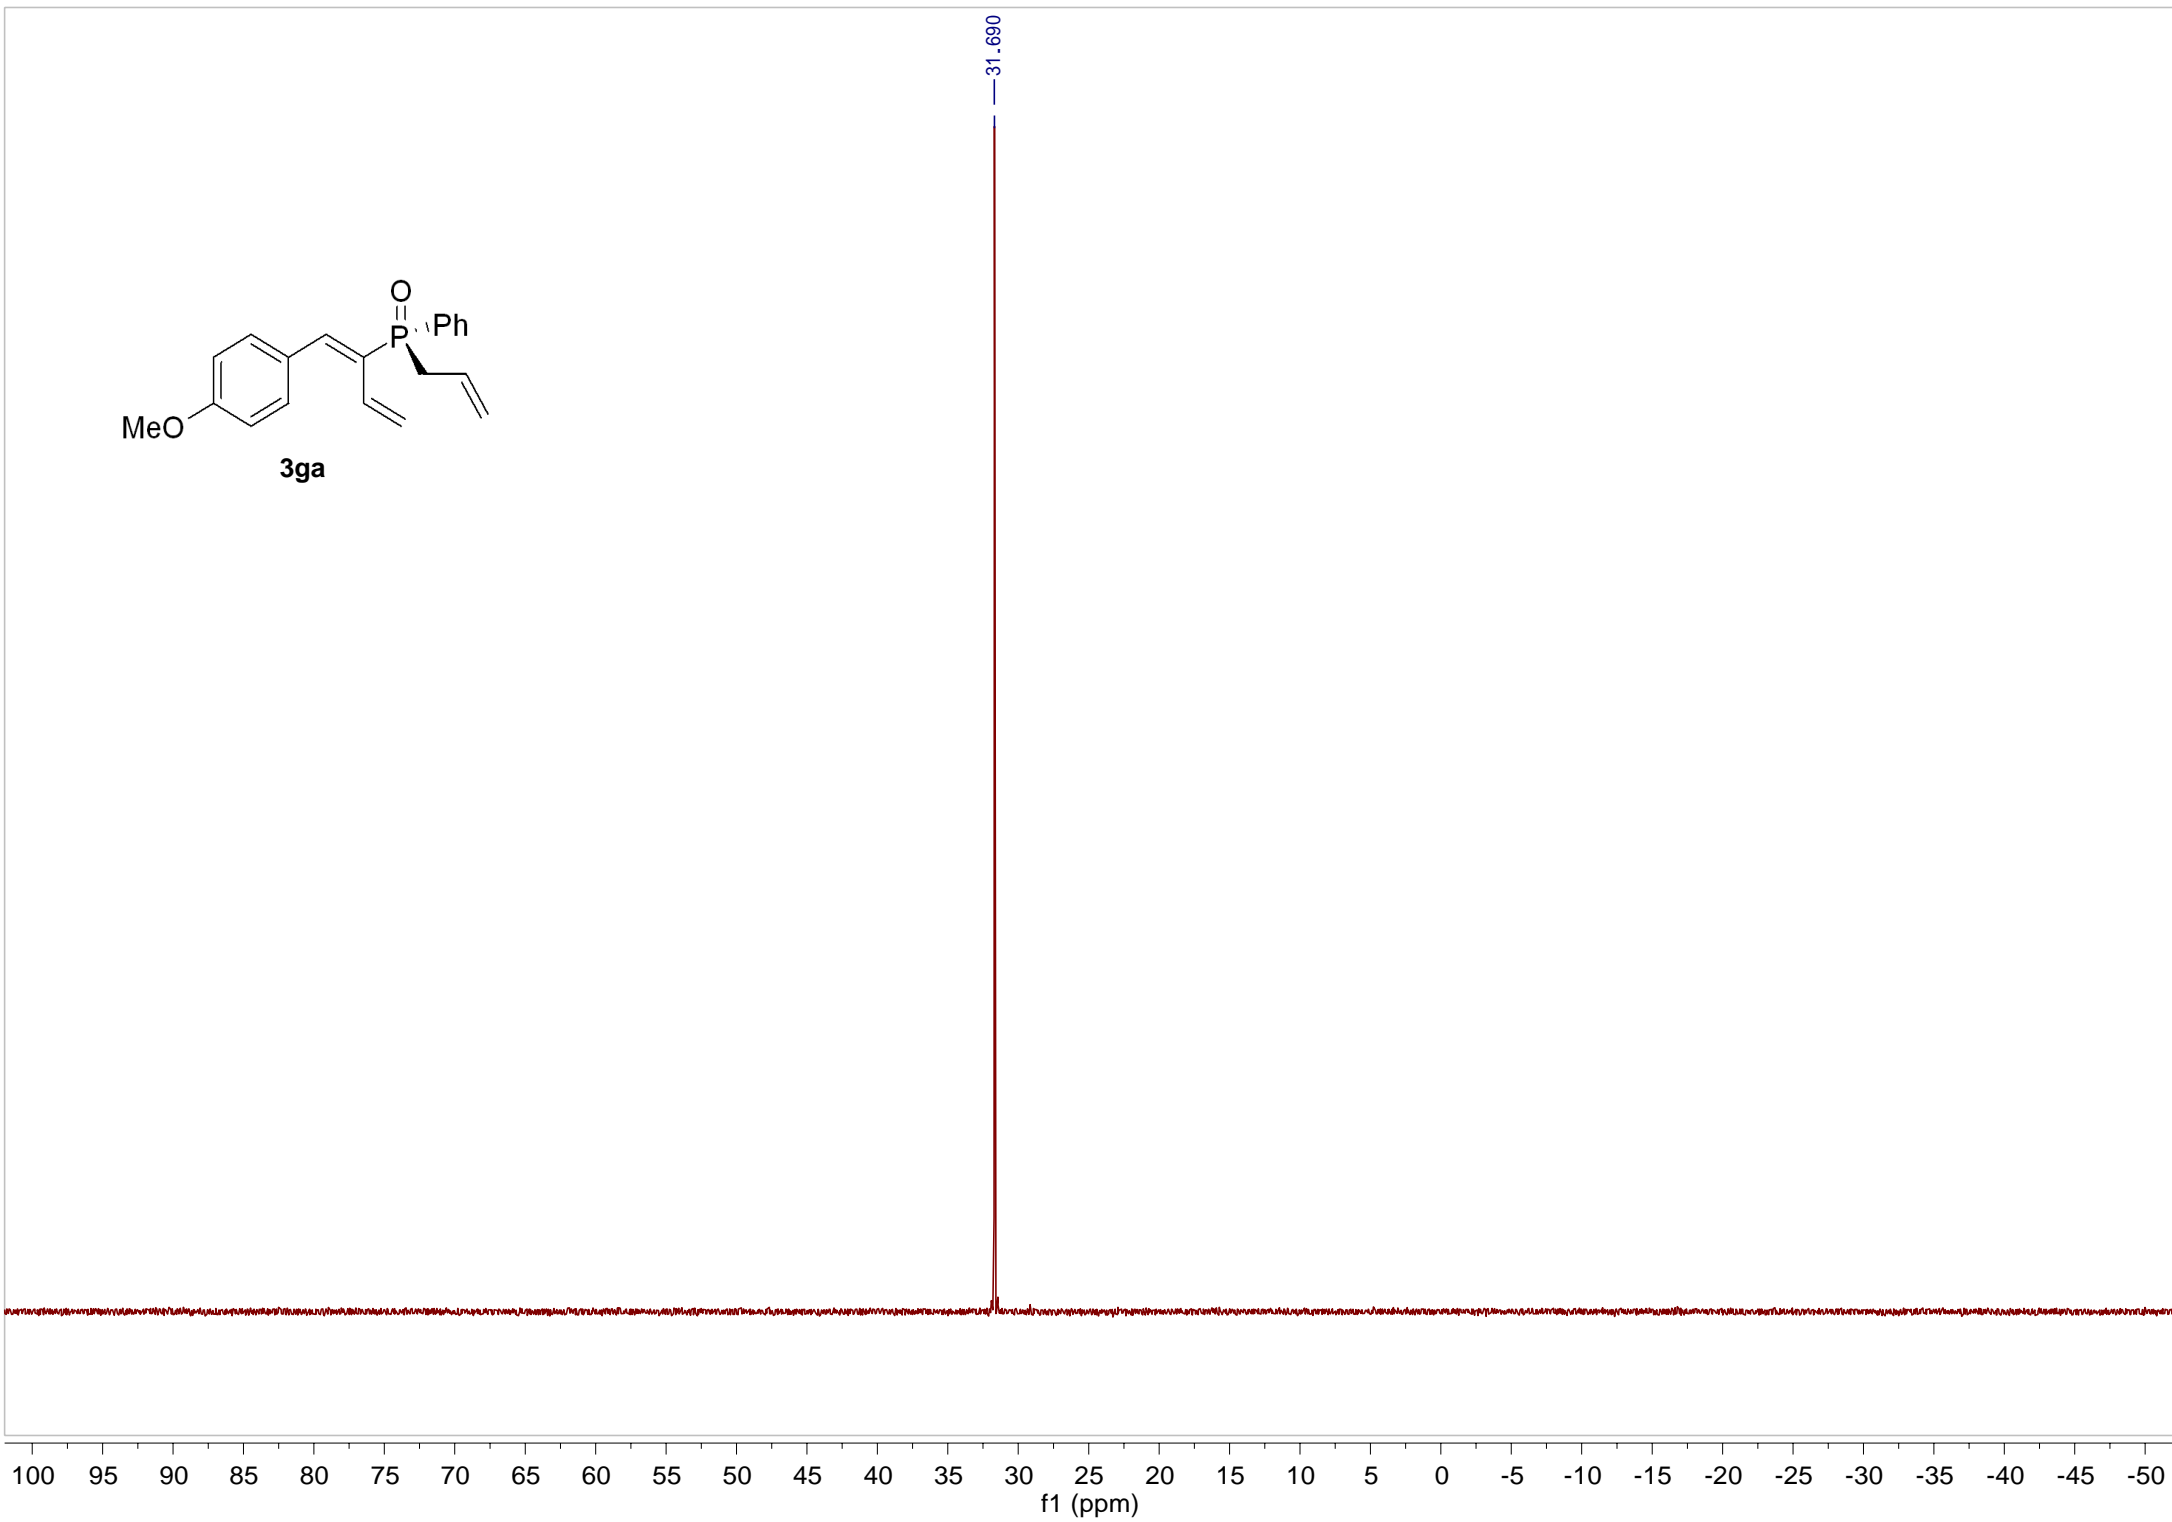

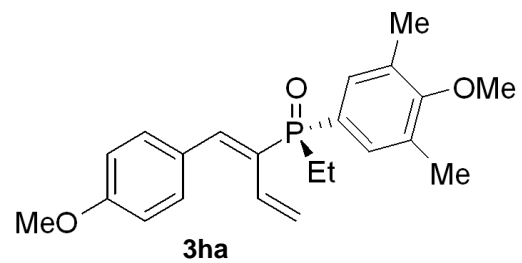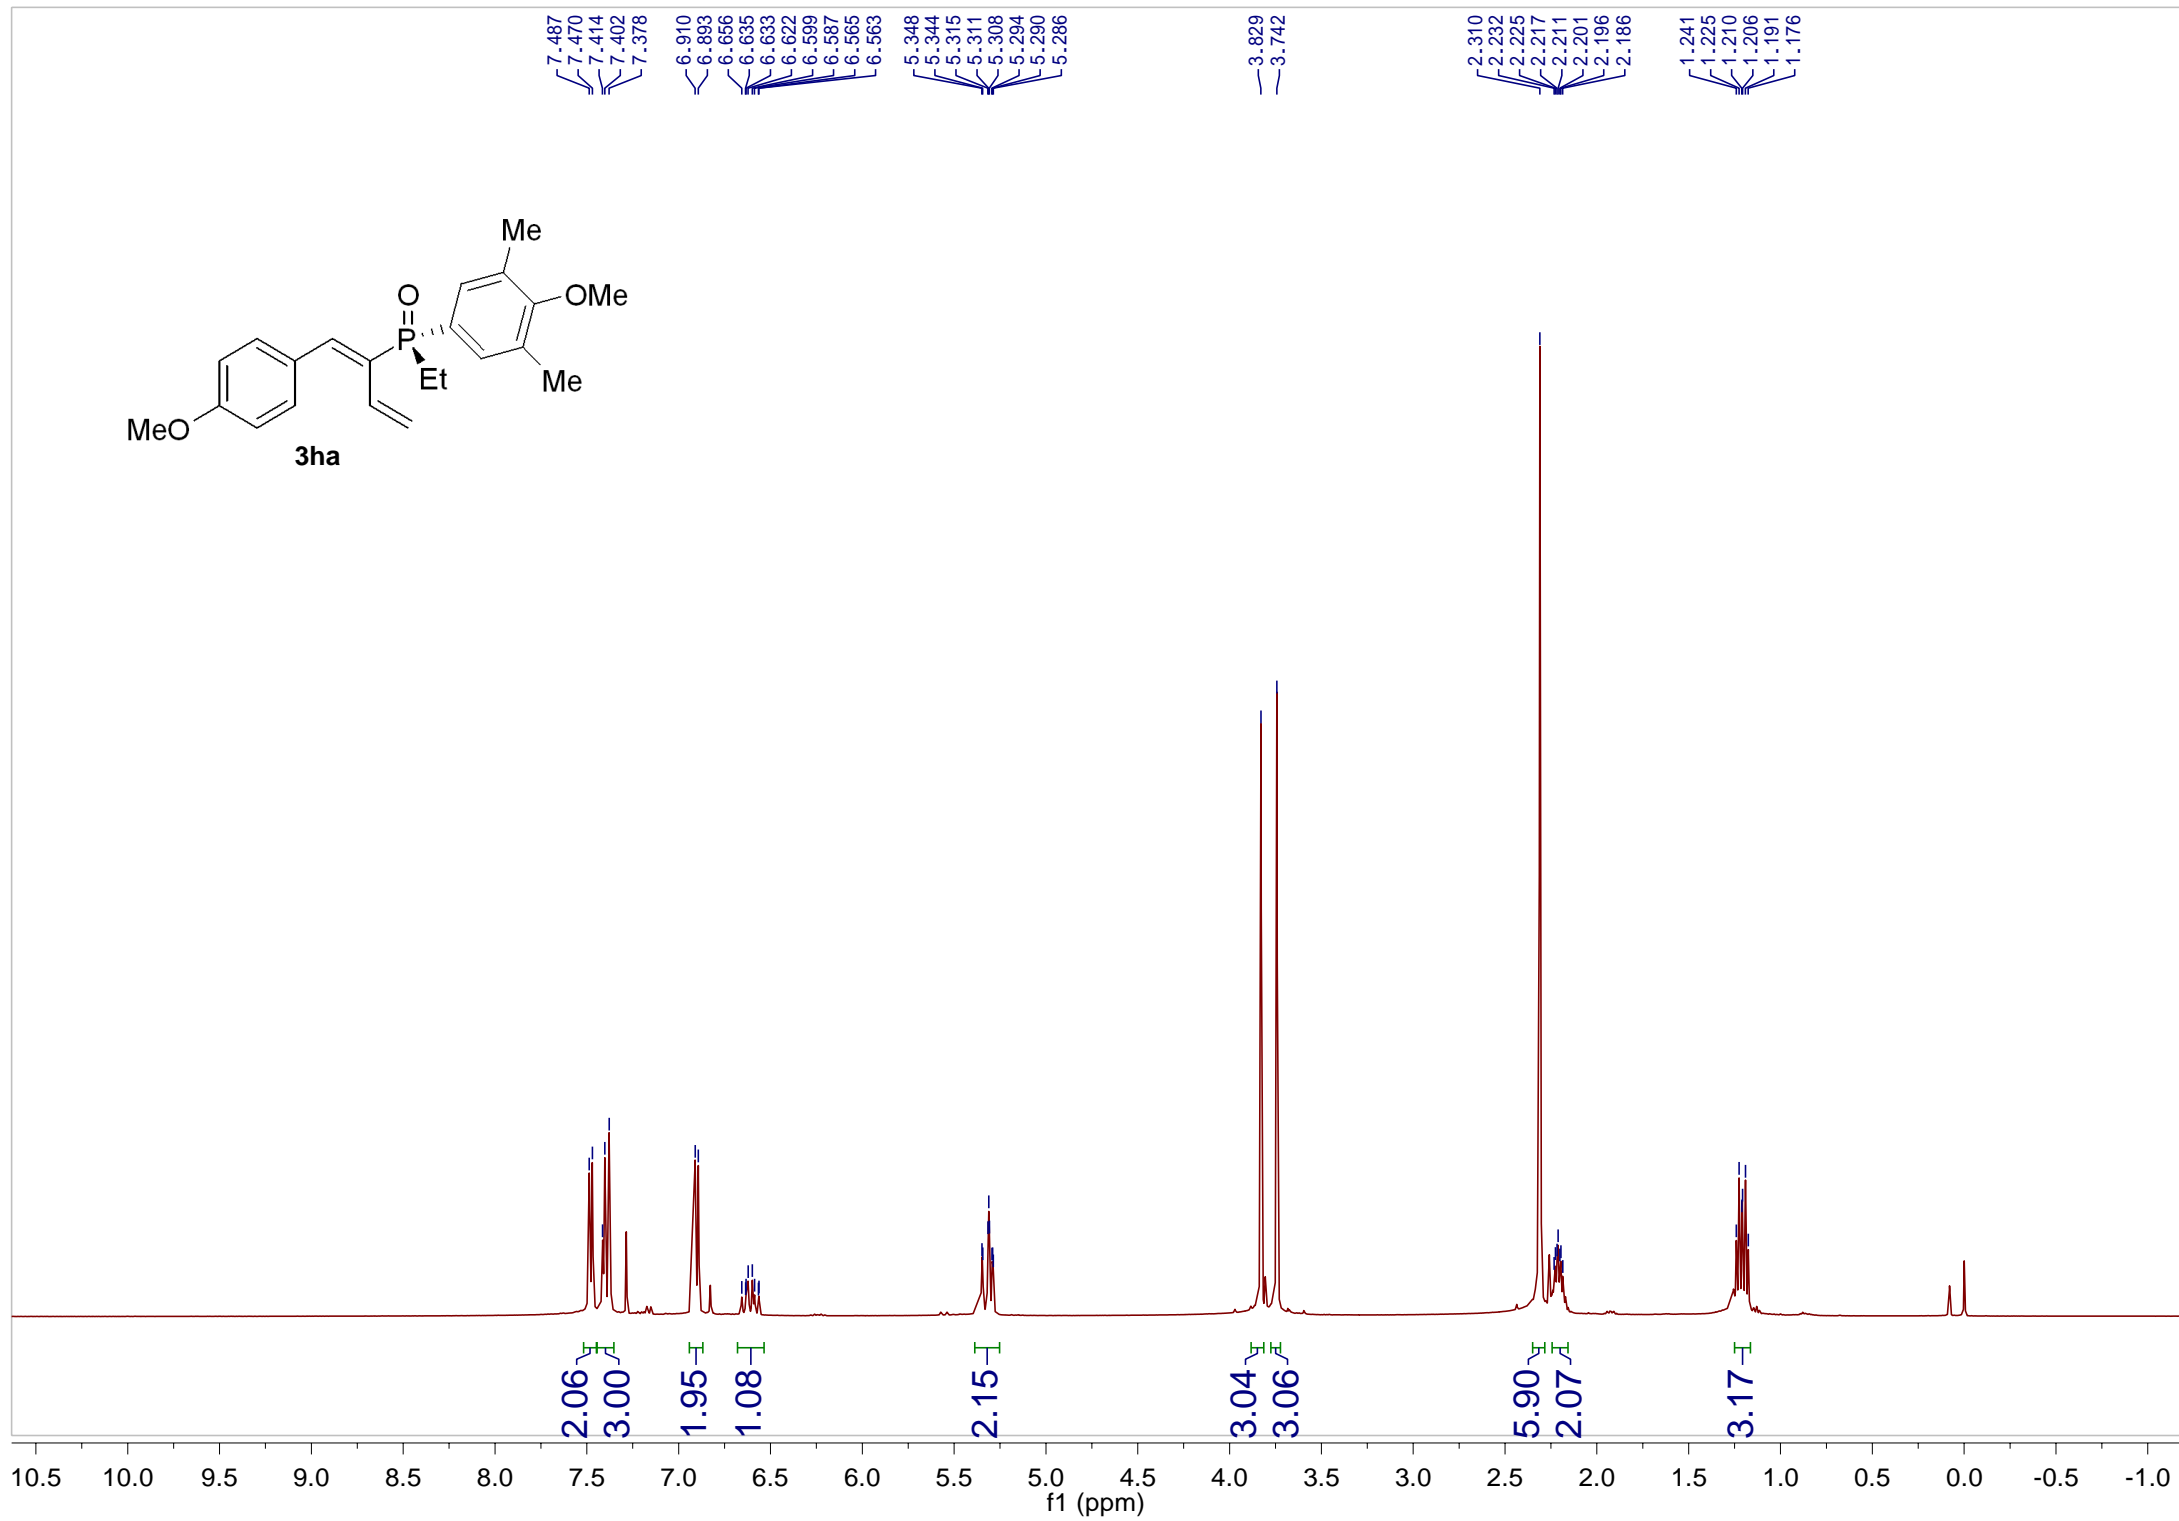

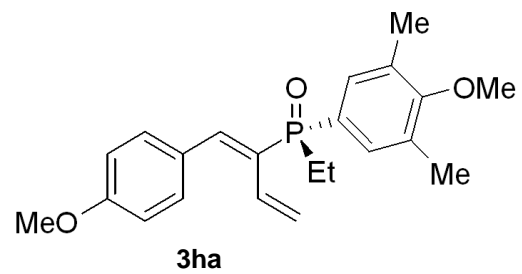

159.933  
159.754  
159.729  
141.949  
141.887  
131.955  
131.881  
131.749  
131.464  
131.438  
131.386  
131.337  
129.429  
128.708  
128.265  
128.238  
128.105  
127.478  
120.222  
120.177

113.644

59.582

55.233

20.309

19.723

16.146

5.454

5.414

200 190 180 170 160 150 140 130 120 110 100 90 80 70 60 50 40 30 20 10 0 -10

f1 (ppm)

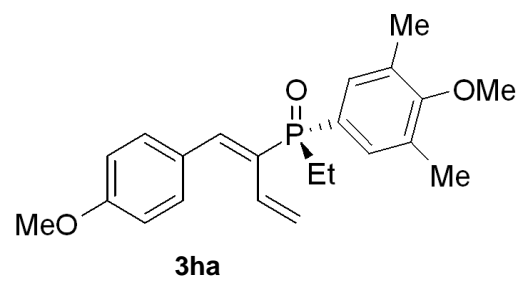

— 35.620

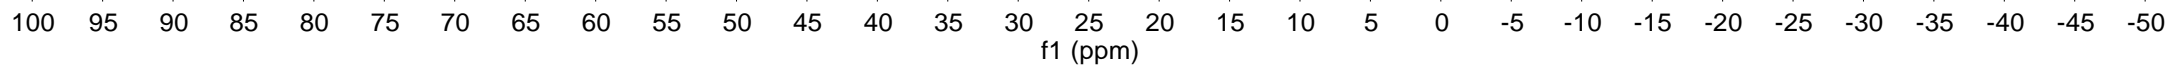

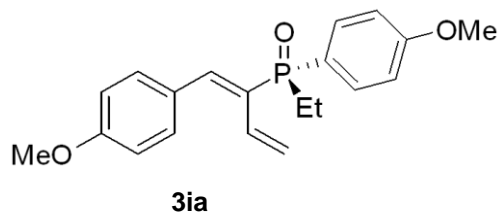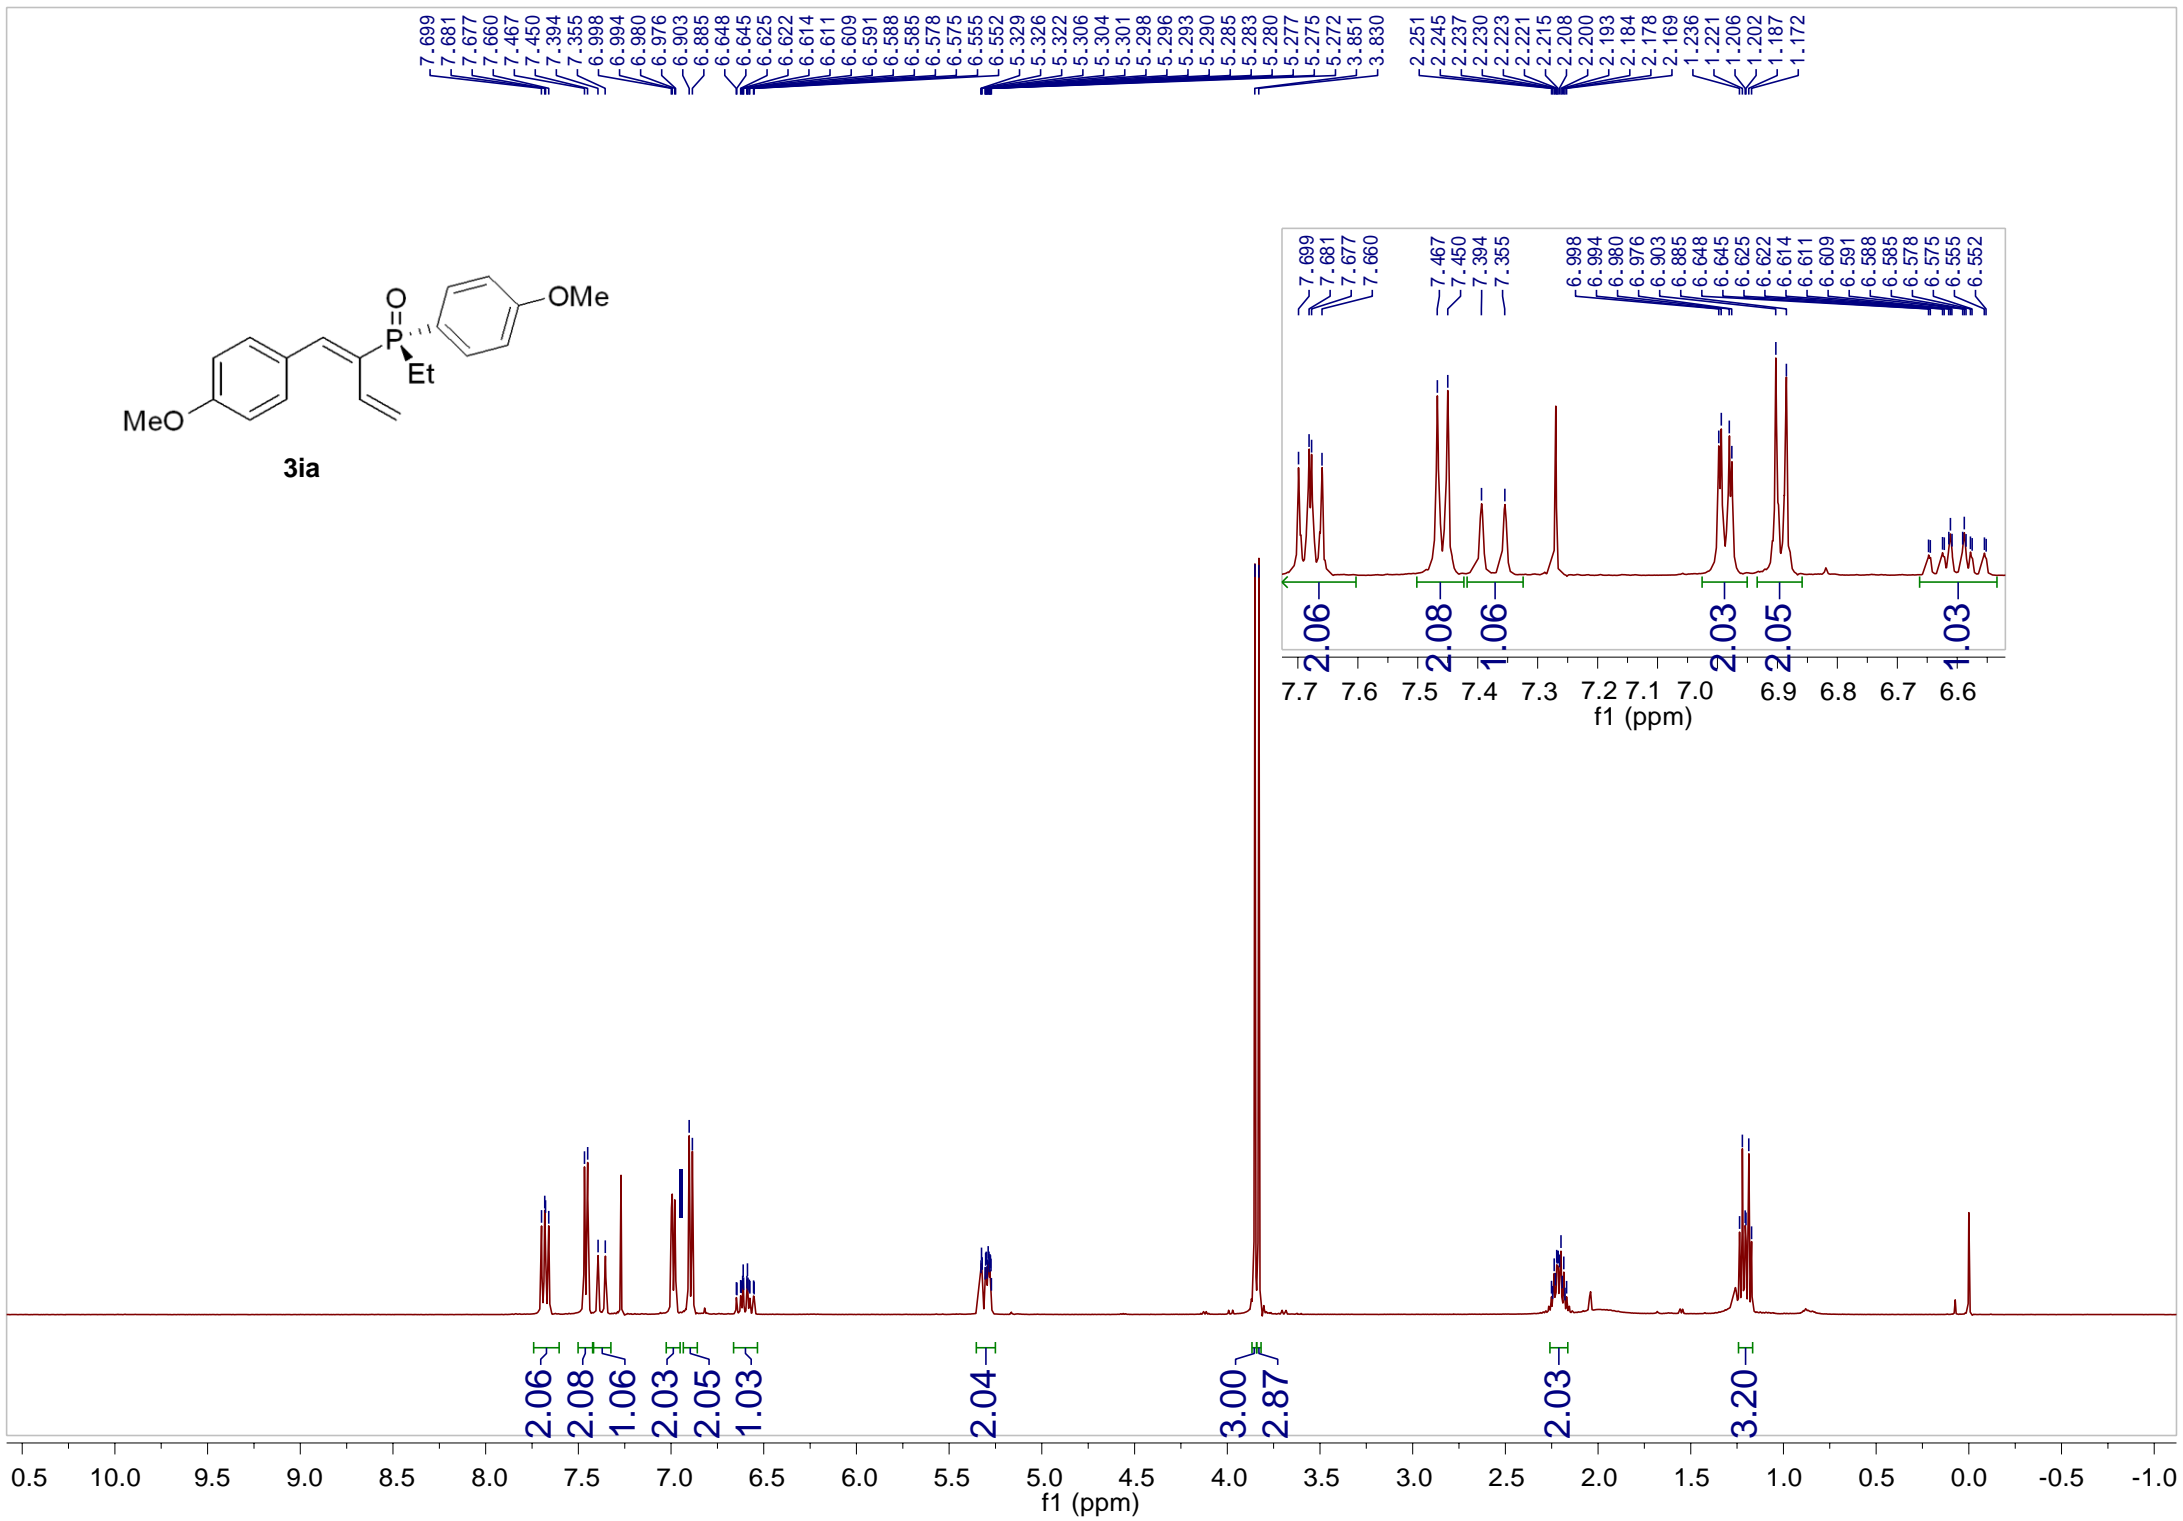

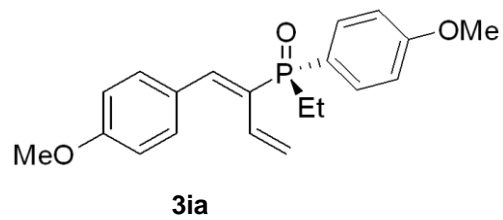

162.169  
162.146  
160.016  
142.005  
141.943  
132.737  
132.653  
132.010  
131.938  
131.785  
129.675  
128.949  
128.279  
128.145  
124.603  
123.785  
120.238  
120.193  
114.179  
114.080  
113.715

55.289  
55.272

20.558  
19.968

5.498  
5.460

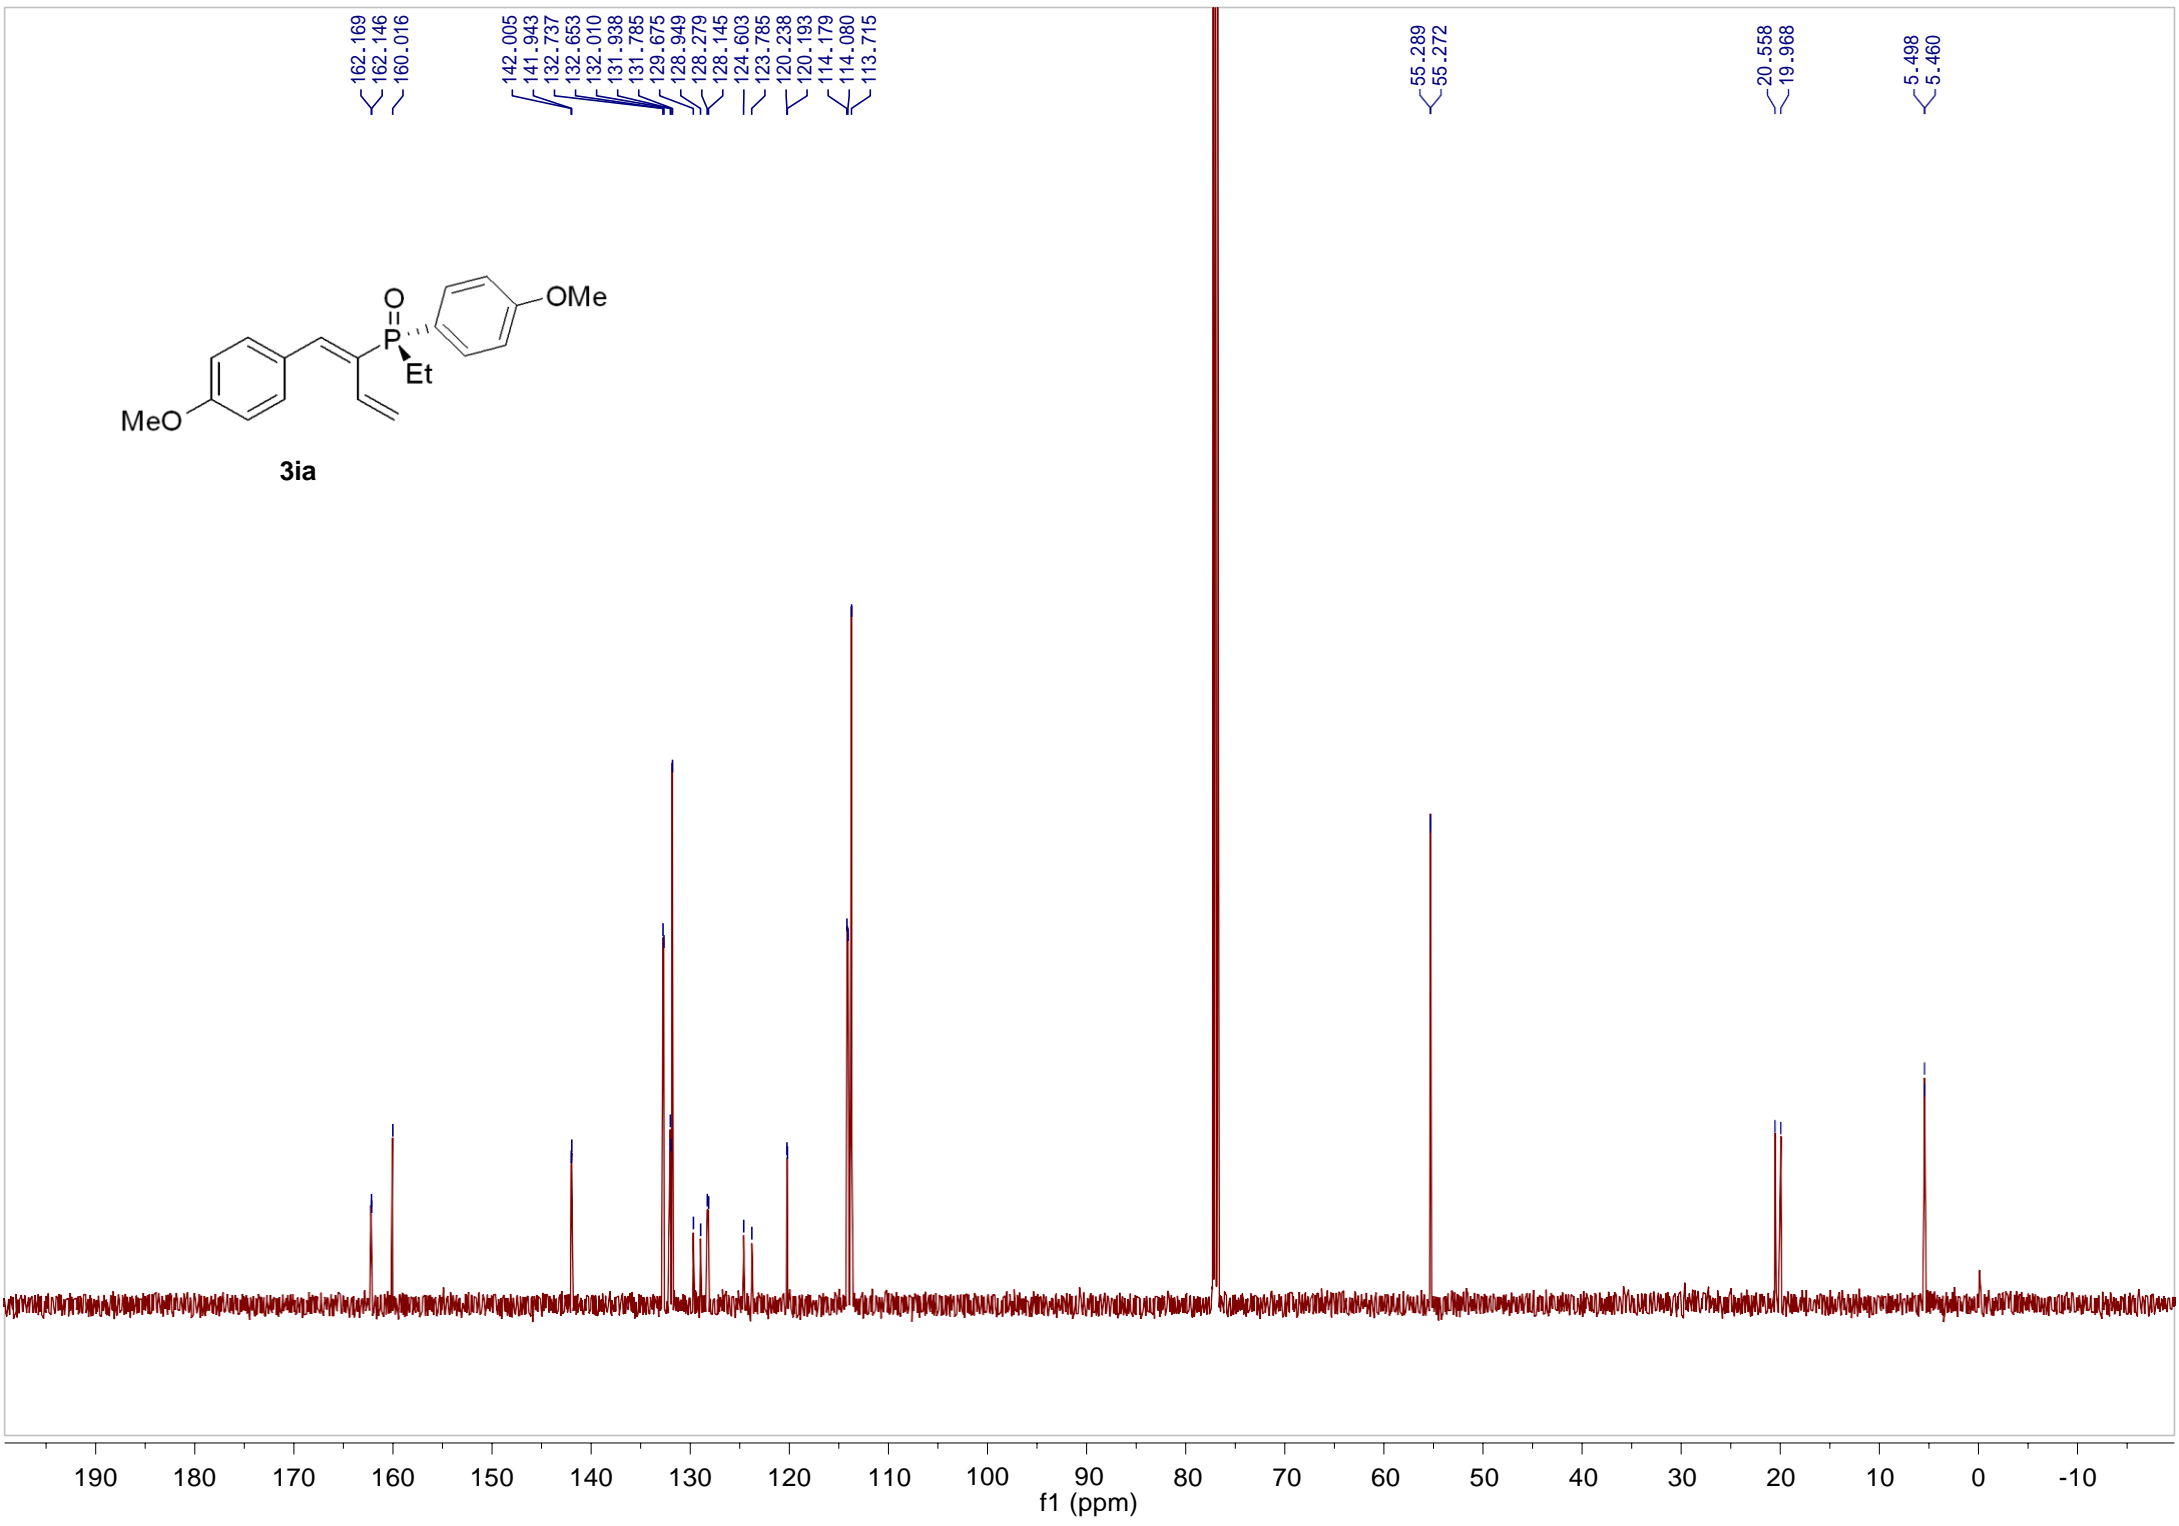

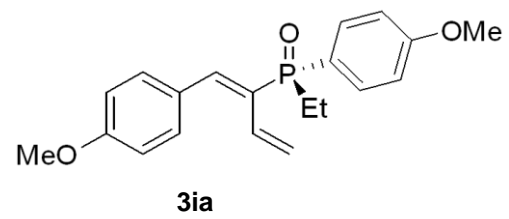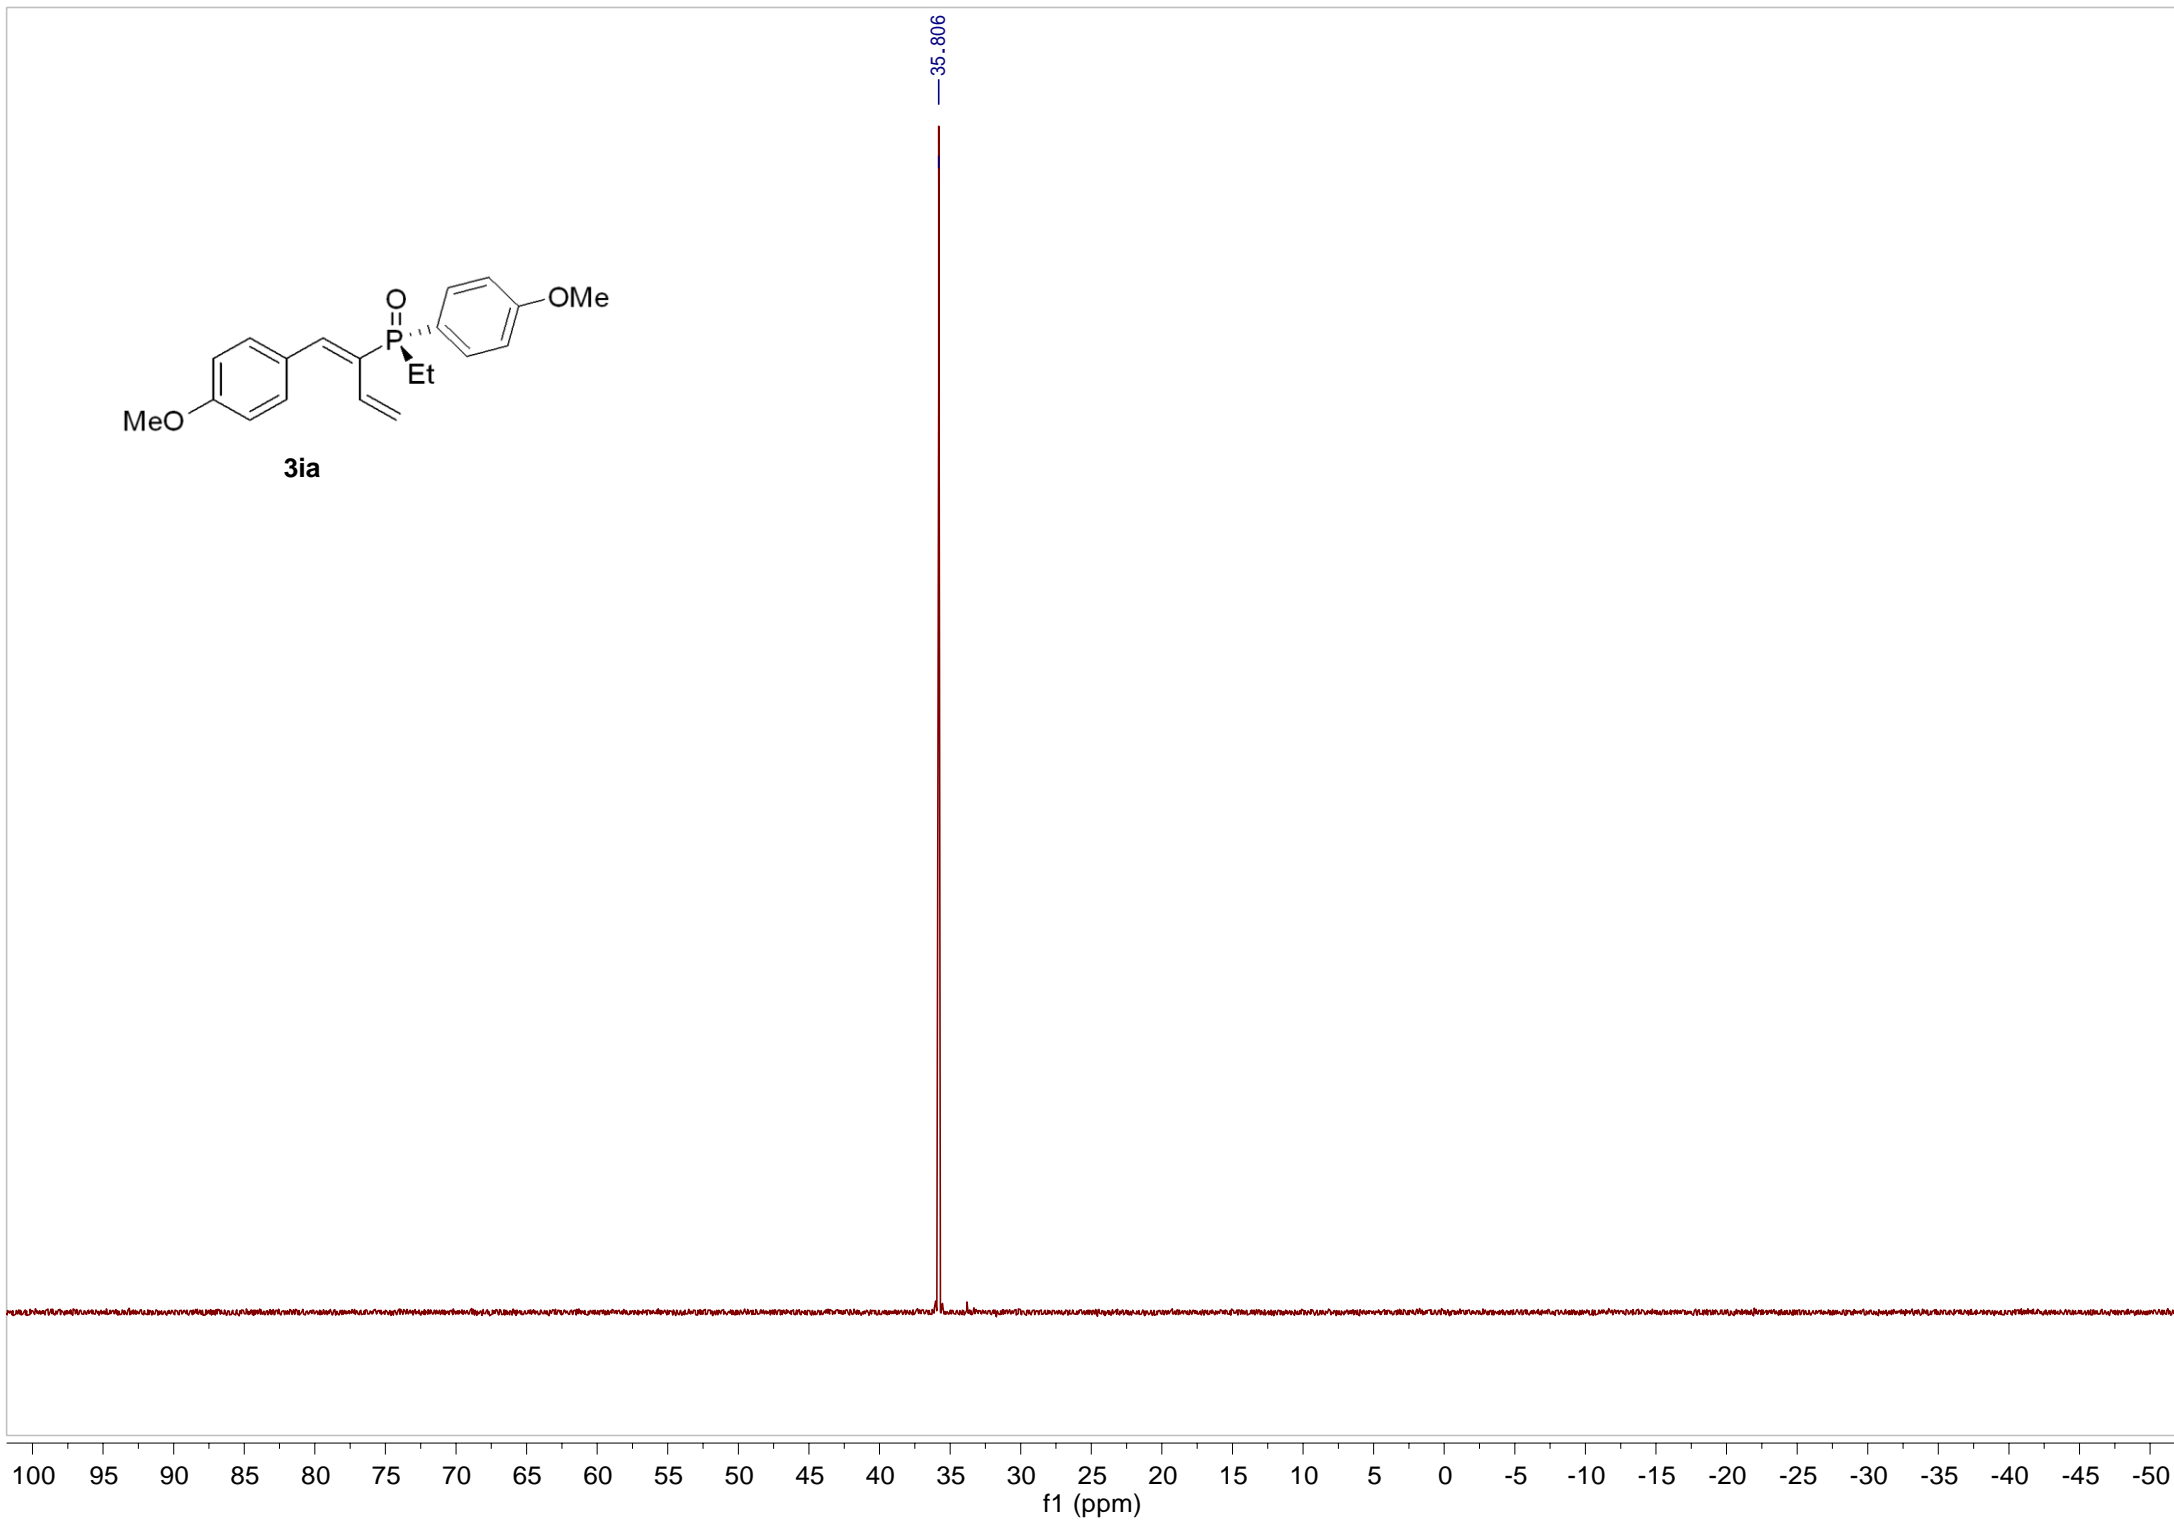

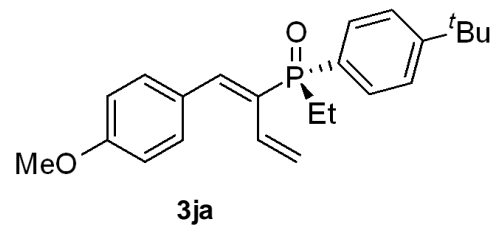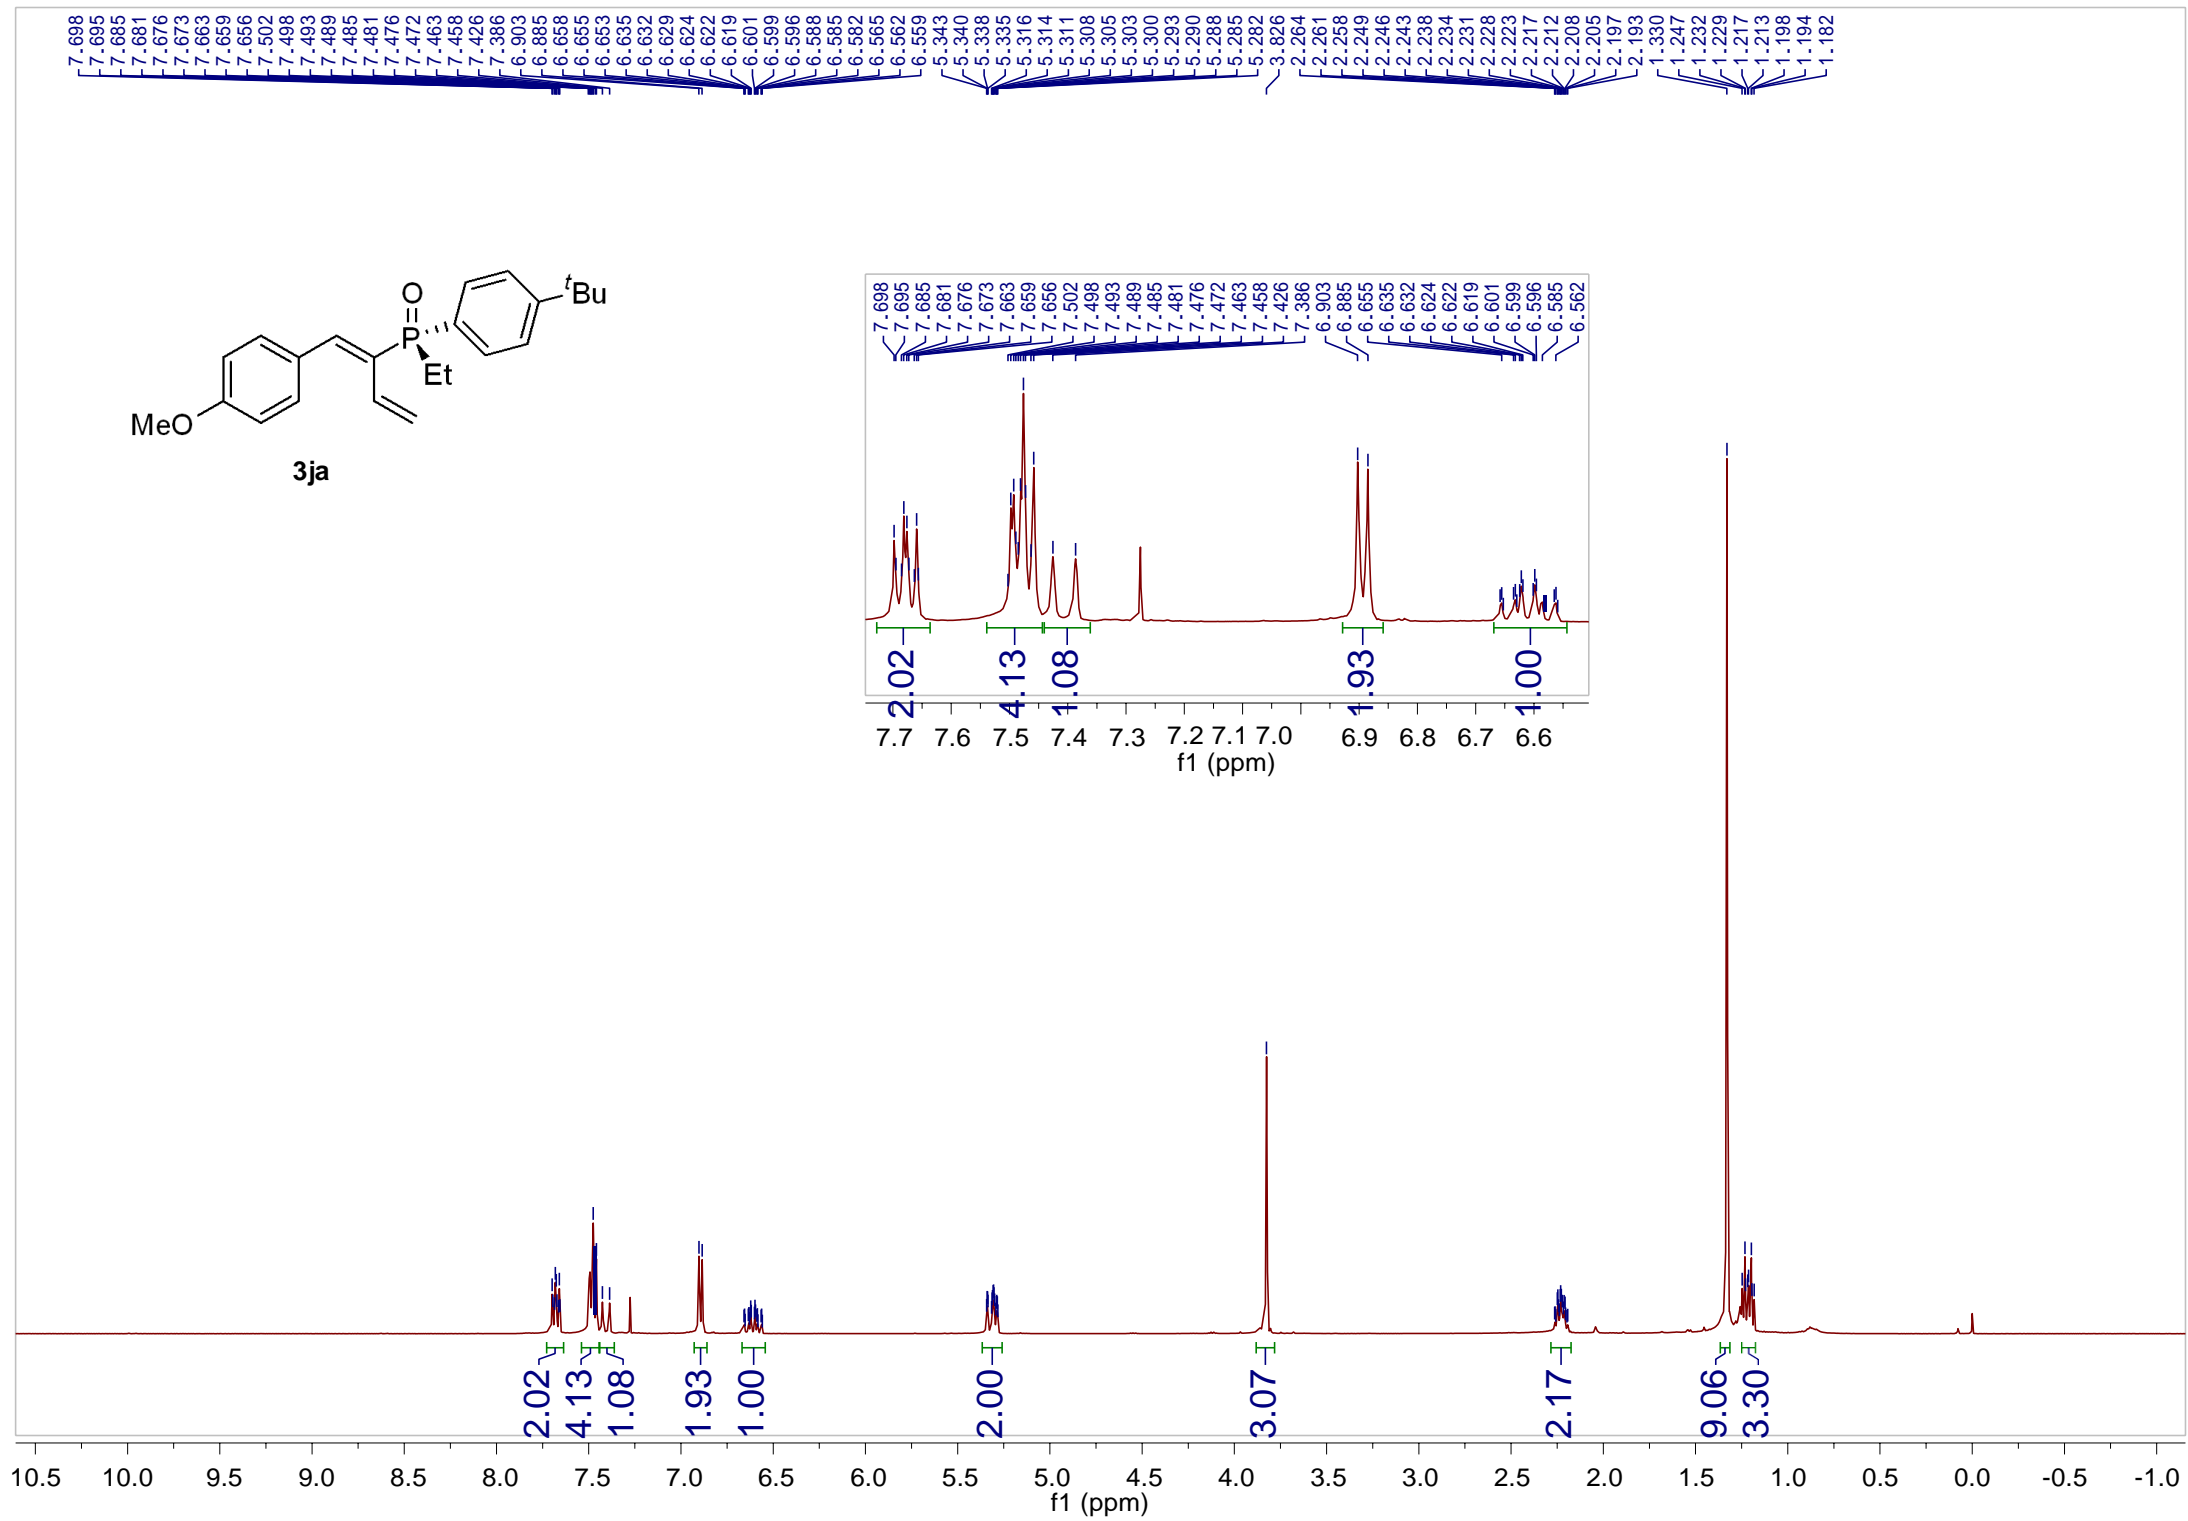



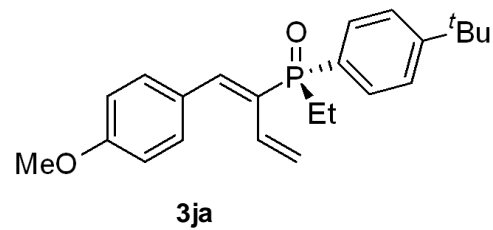

159.989  
154.974  
154.953  
142.160  
142.098  
131.986  
131.913  
131.761  
130.687  
130.612  
130.148  
129.417  
129.357  
128.696  
128.264  
128.131  
125.582  
125.491  
120.269  
120.223  
113.682

55.252

34.898

31.060

20.412

19.824

5.451

5.412

00 190 180 170 160 150 140 130 120 110 100 90 80 70 60 50 40 30 20 10 0 -10

f1 (ppm)

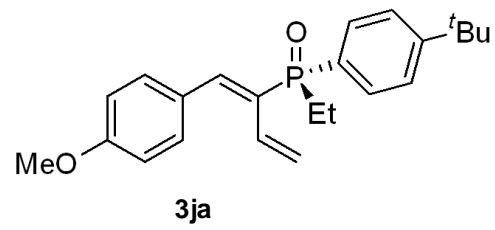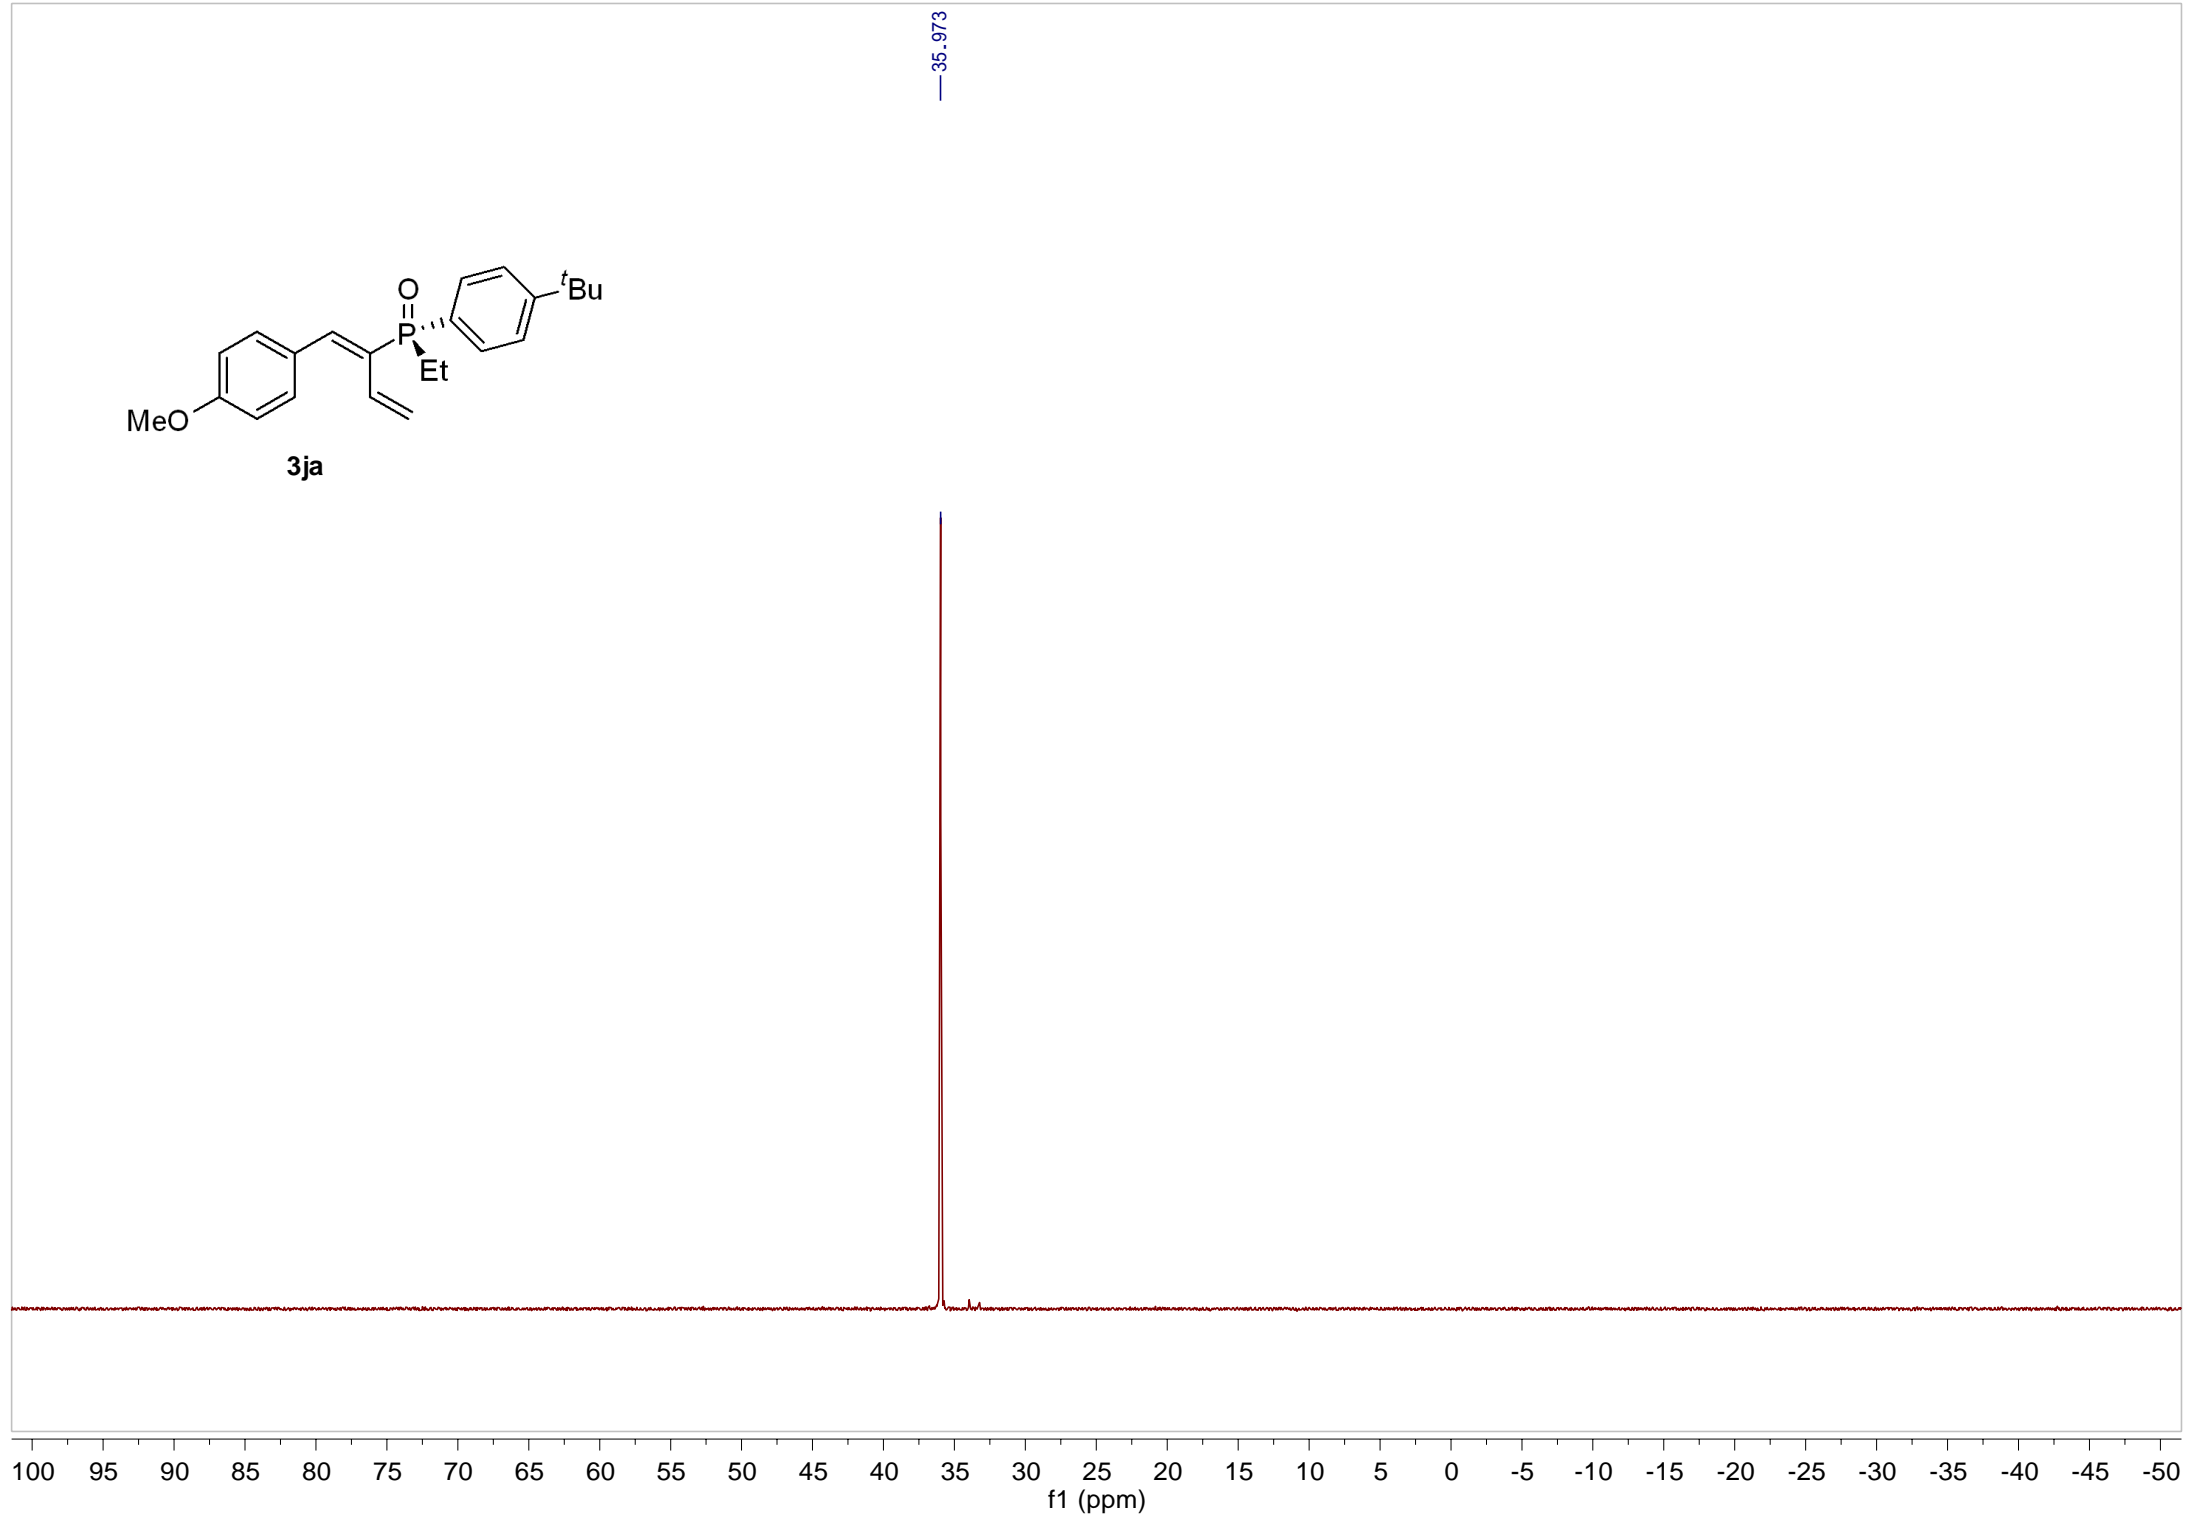

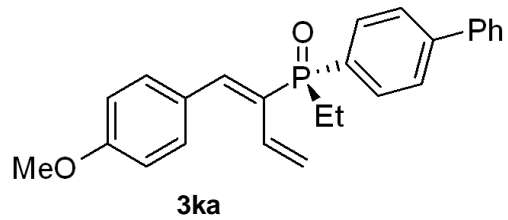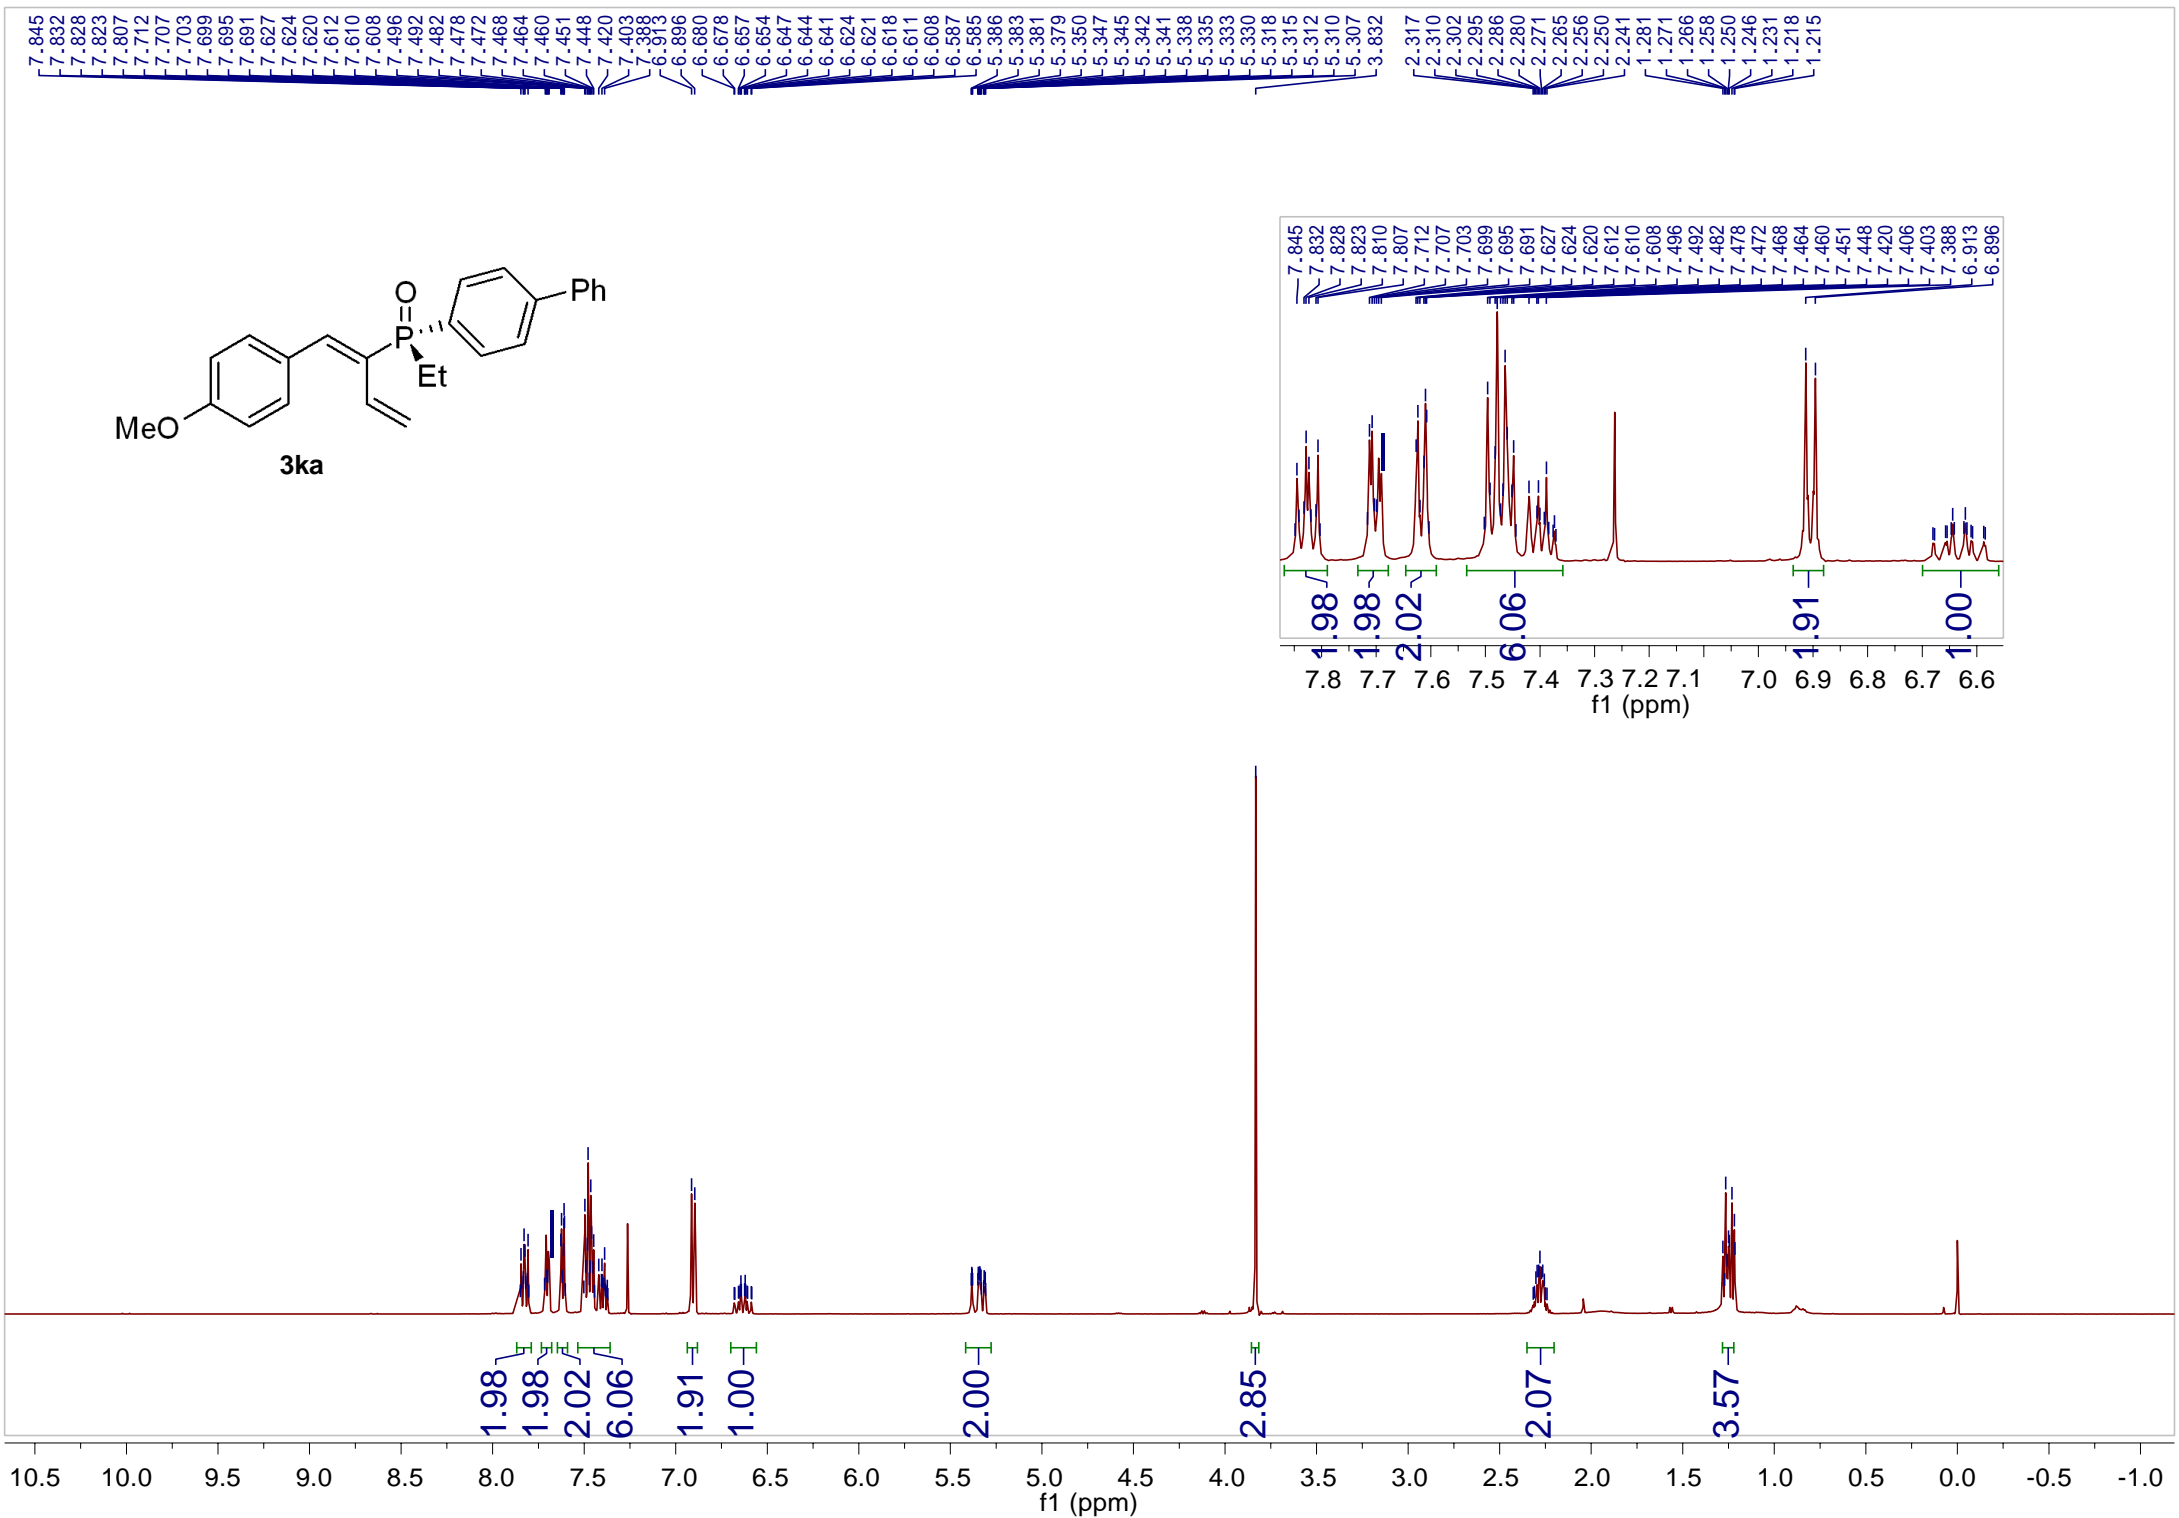

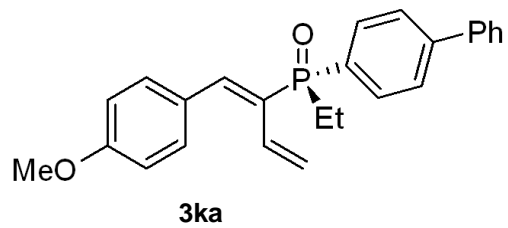

160.095  
 144.299  
 144.277  
 142.305  
 142.242  
 139.936  
 132.118  
 131.945  
 131.873  
 131.847  
 131.389  
 131.337  
 131.313  
 129.278  
 128.887  
 128.554  
 128.205  
 128.071  
 128.034  
 127.267  
 127.199  
 127.173  
 120.443  
 120.397  
 113.750

55.295

20.525  
 19.937

5.487  
 5.447

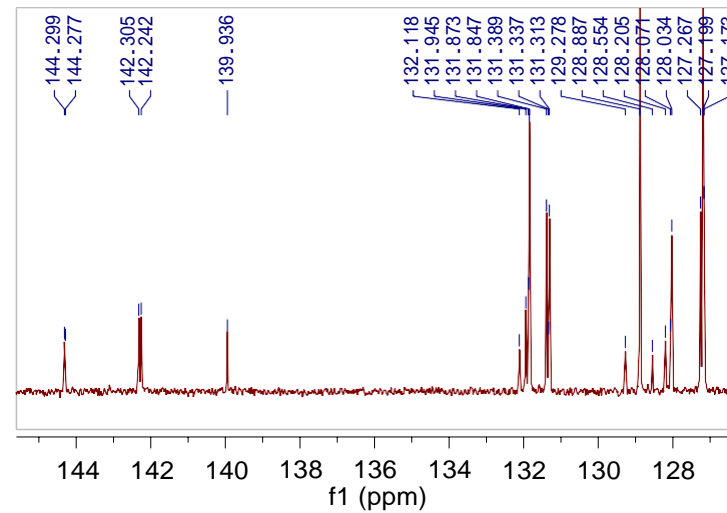

200 190 180 170 160 150 140 130 120 110 100 90 80 70 60 50 40 30 20 10 0 -10  
 f1 (ppm)

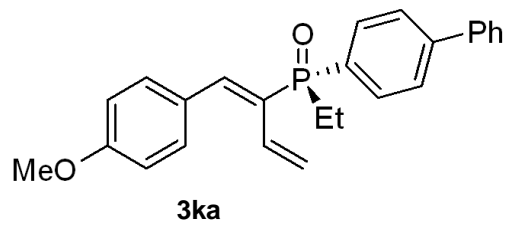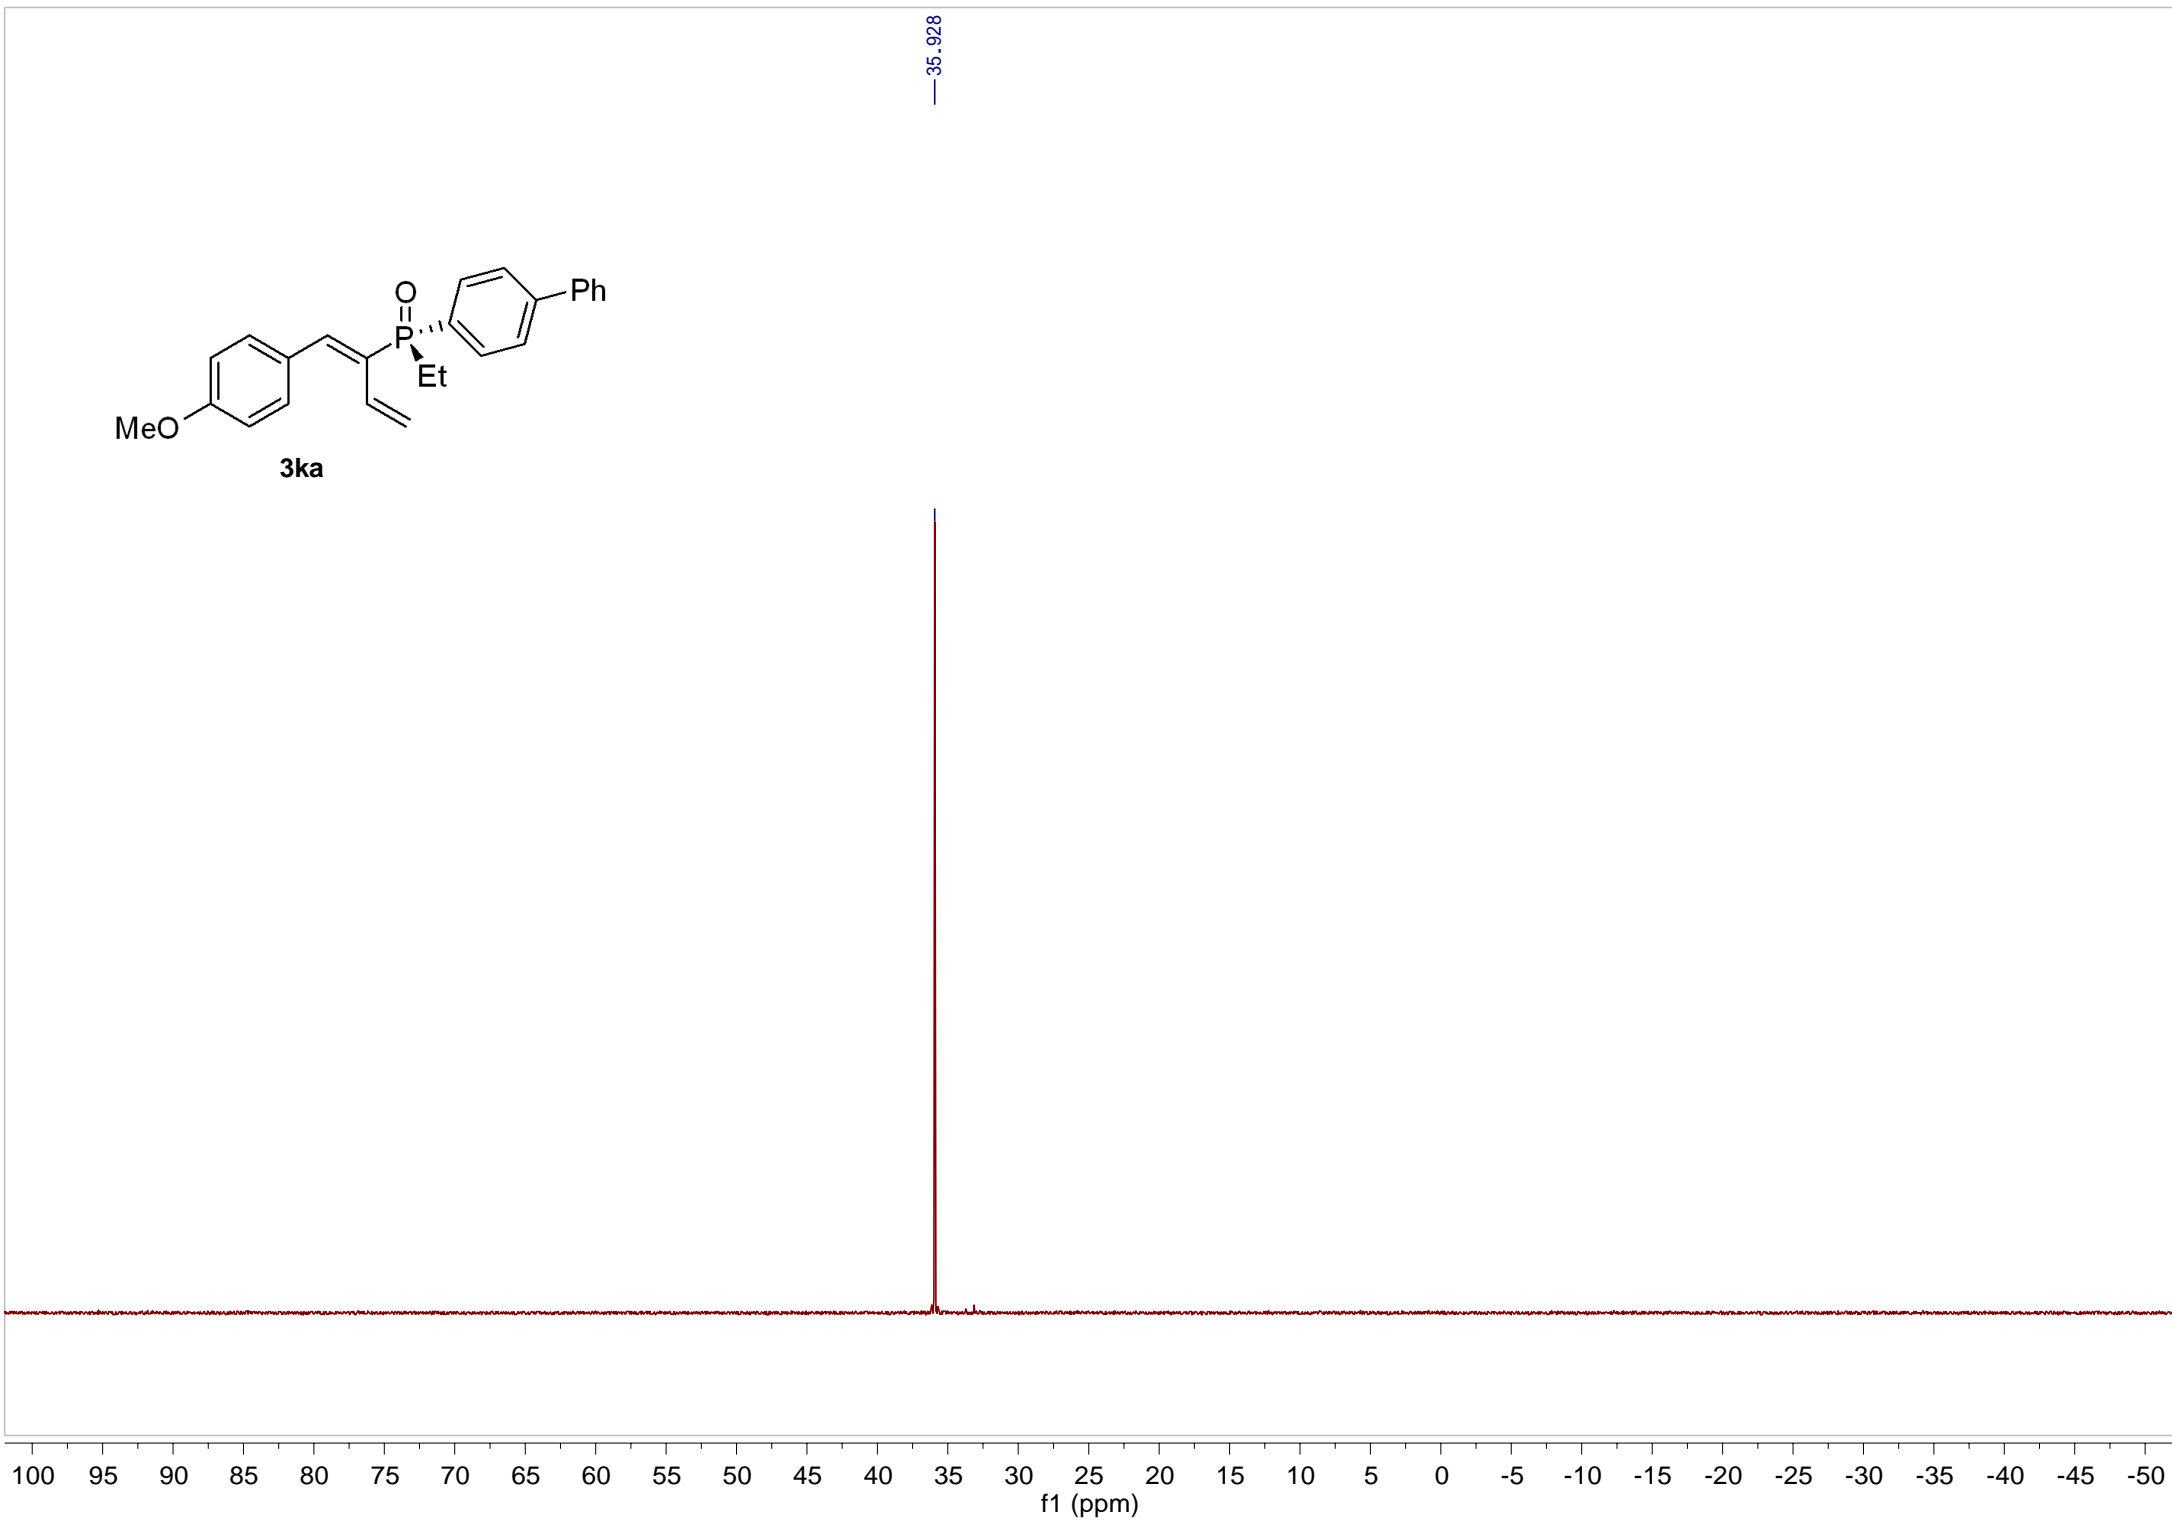

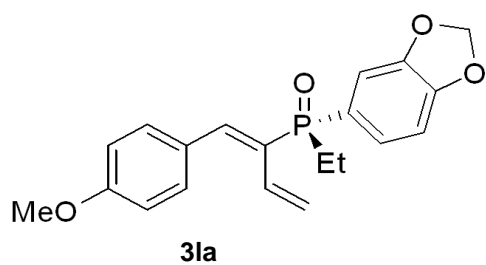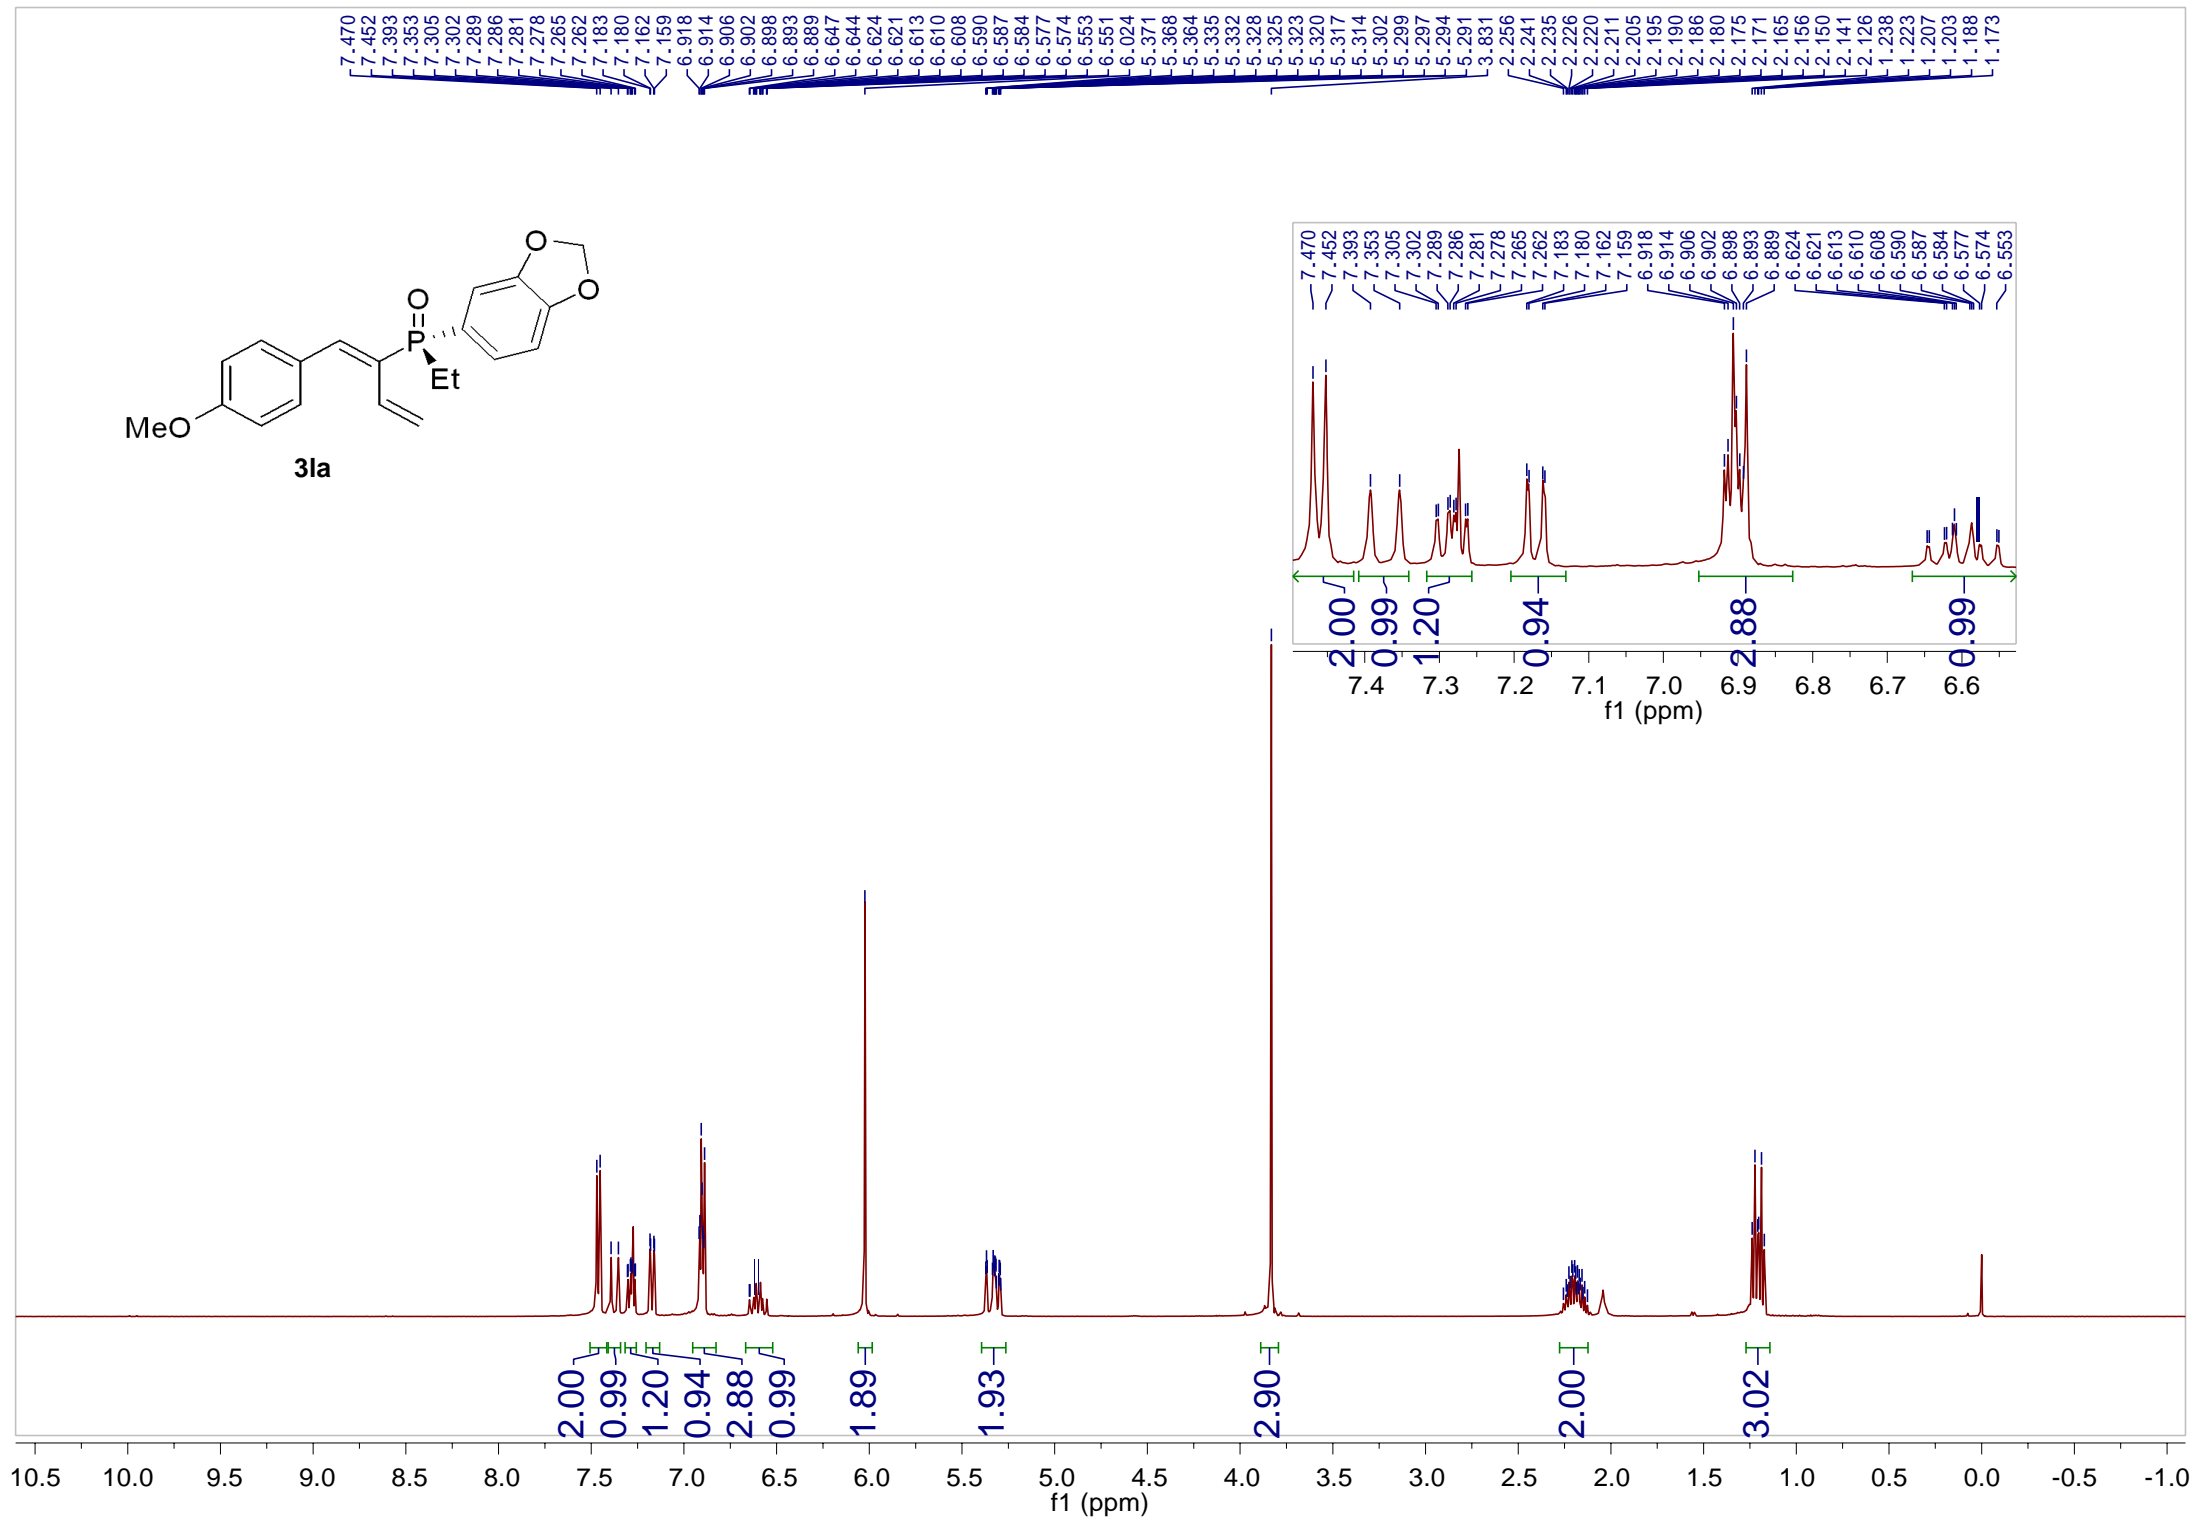

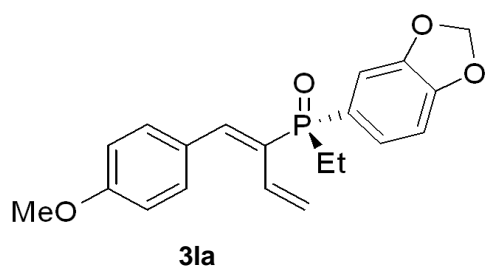

160.106  
150.490  
150.468  
148.100  
147.964  
142.102  
142.038  
131.962  
131.890  
131.848  
129.519  
128.791  
128.219  
128.085  
126.711  
126.073  
125.992  
125.912  
120.375  
120.330  
113.775  
110.509  
110.415  
108.836  
108.723  
101.532

55.335

20.663  
20.071

5.536  
5.497

190 180 170 160 150 140 130 120 110 90 80 70 60 50 40 30 20 10 0 -10

f1 (ppm)

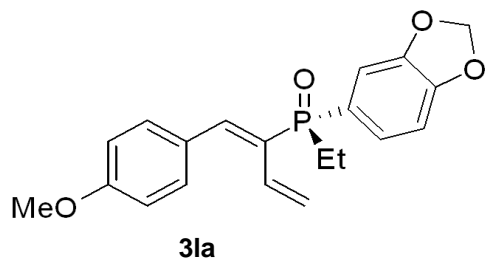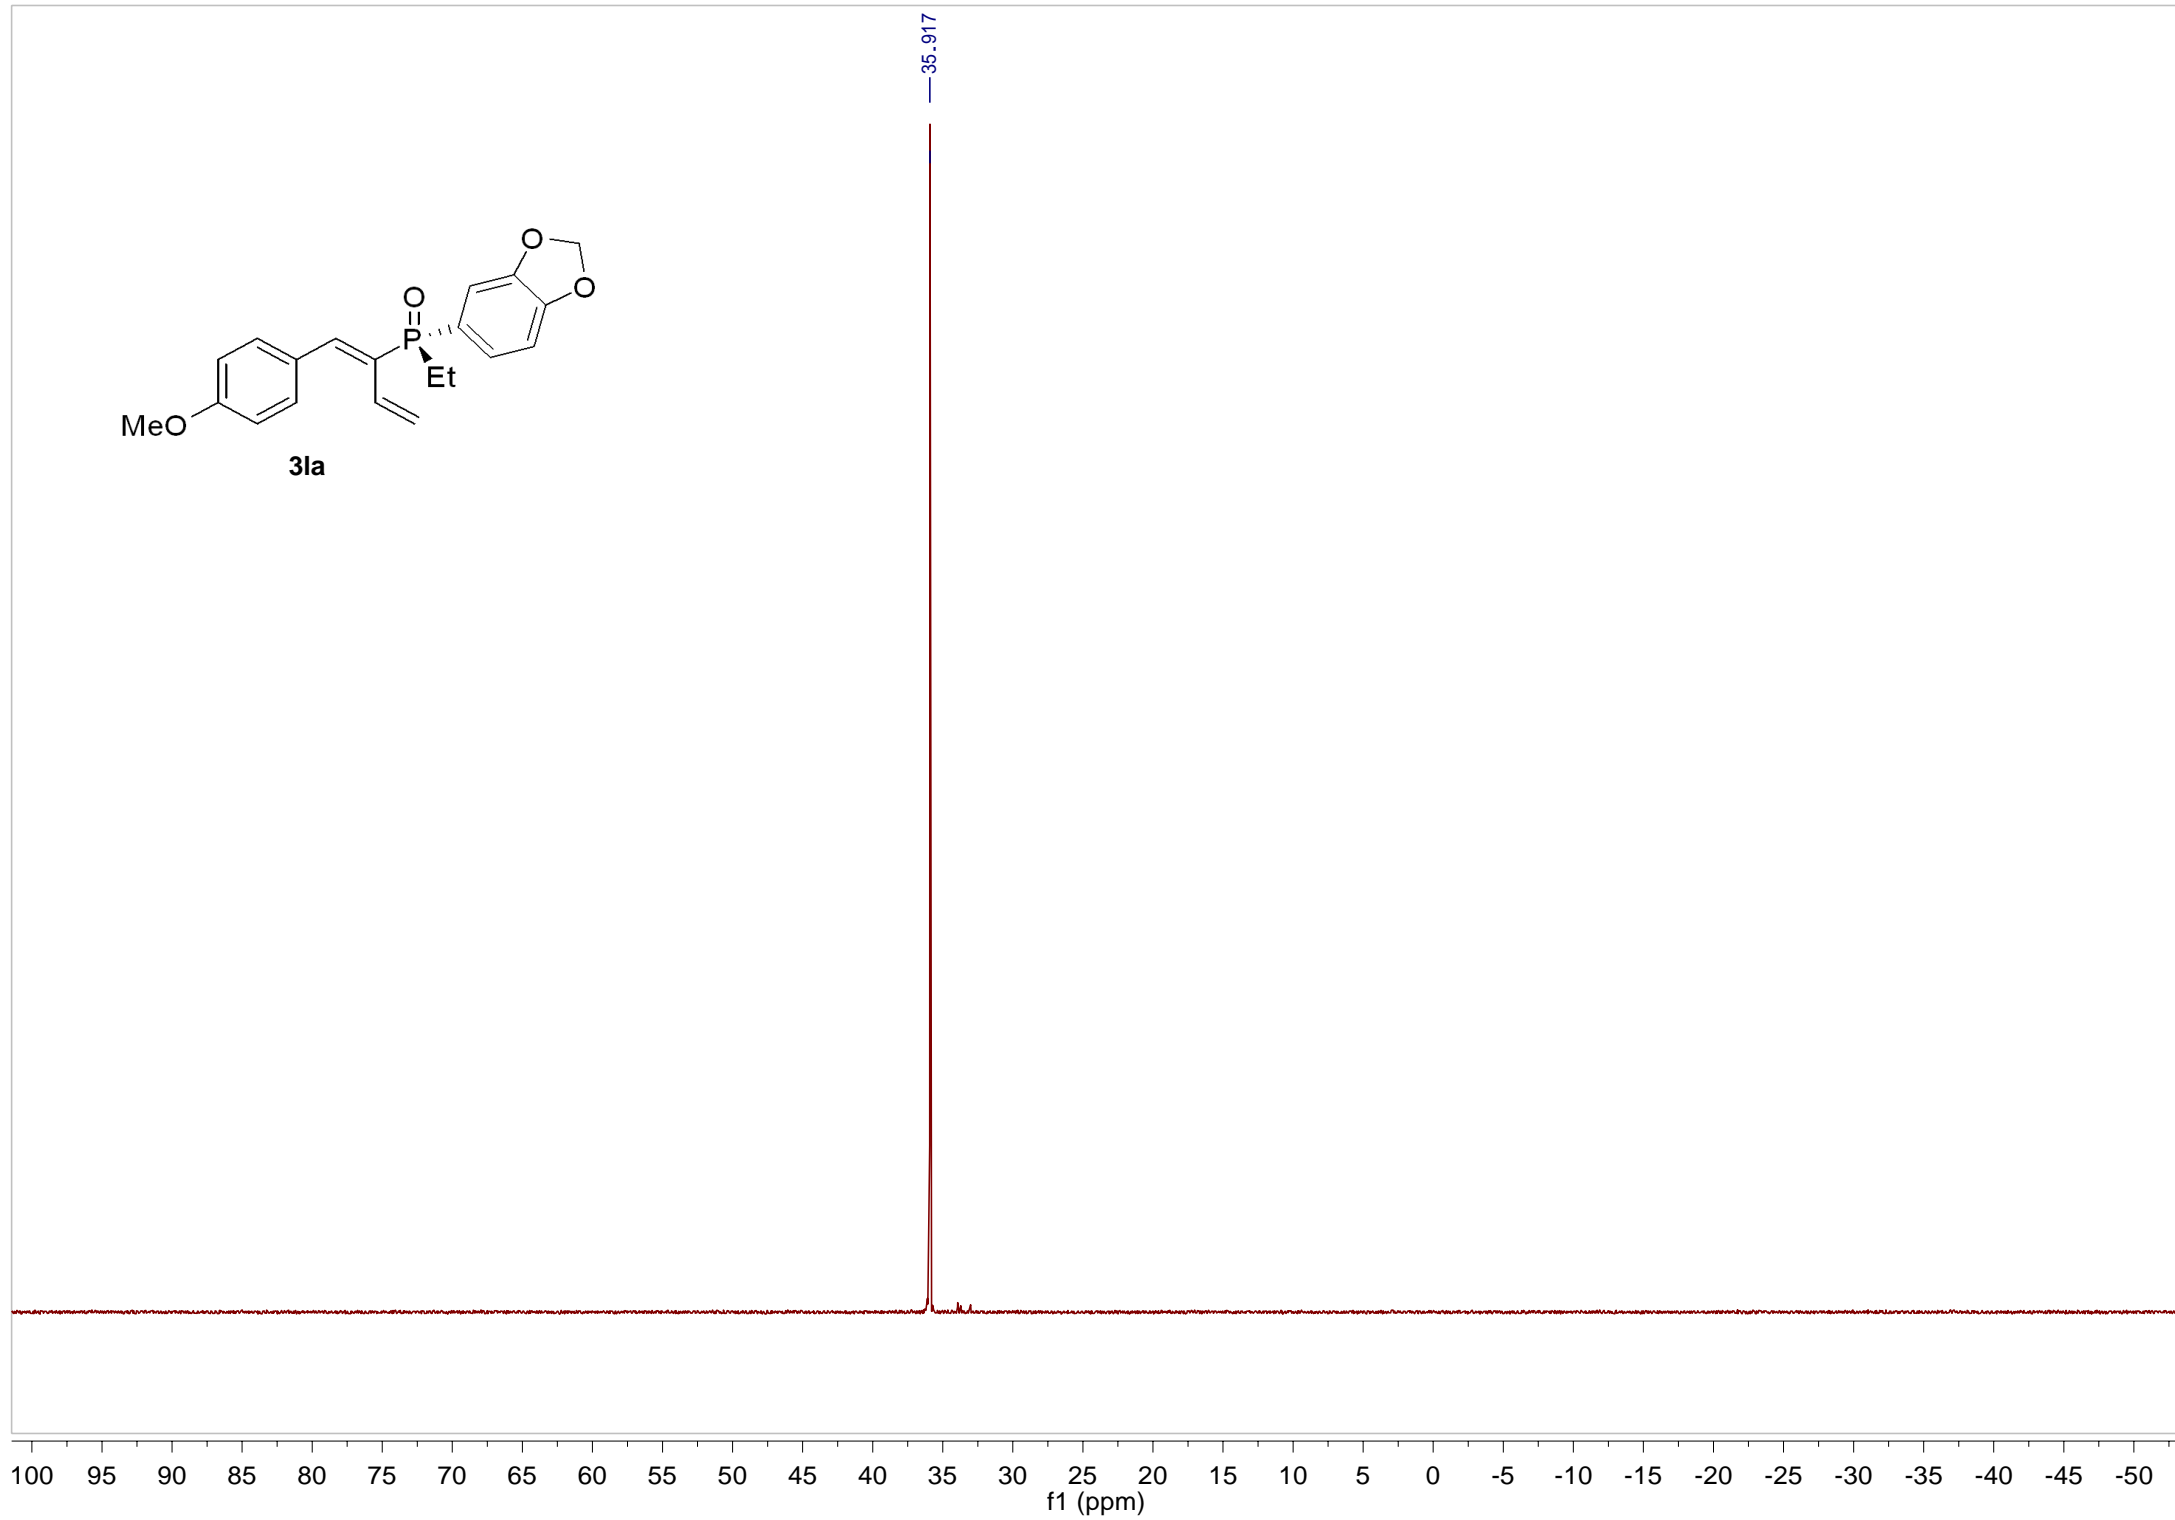



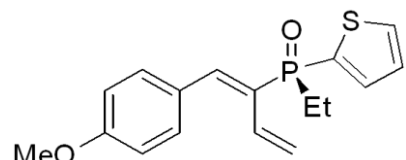

3ma

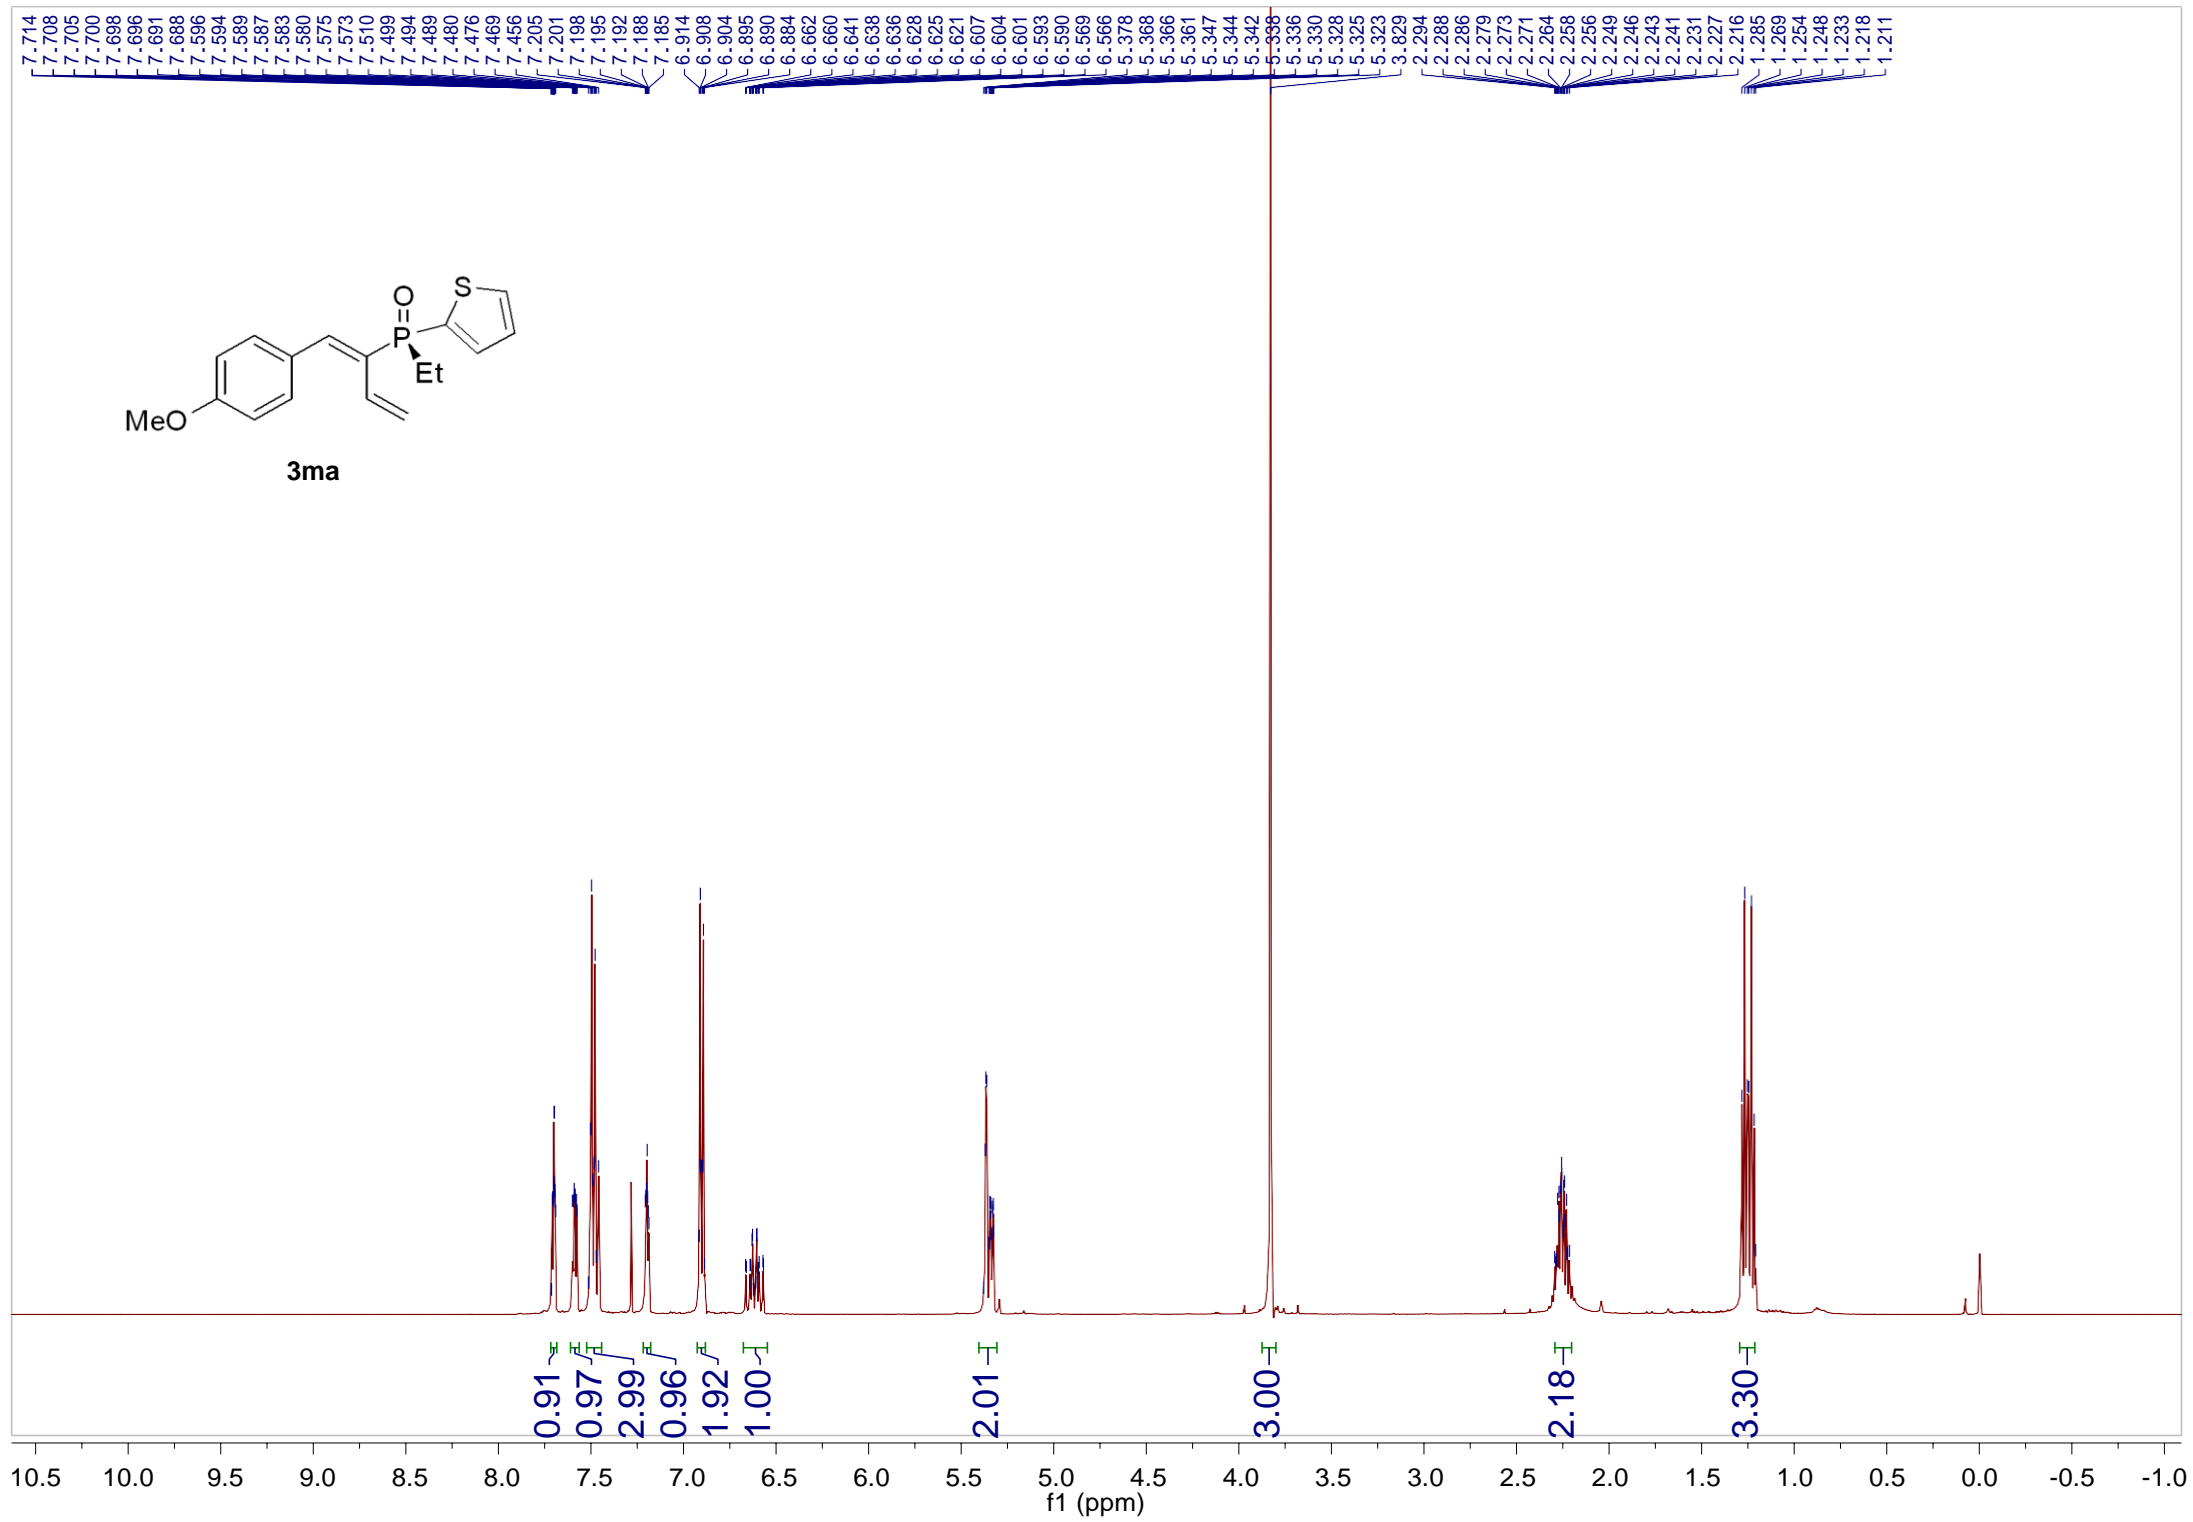

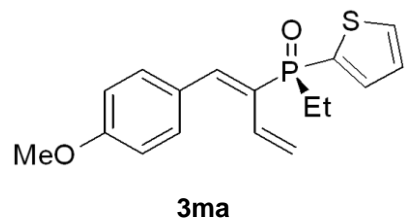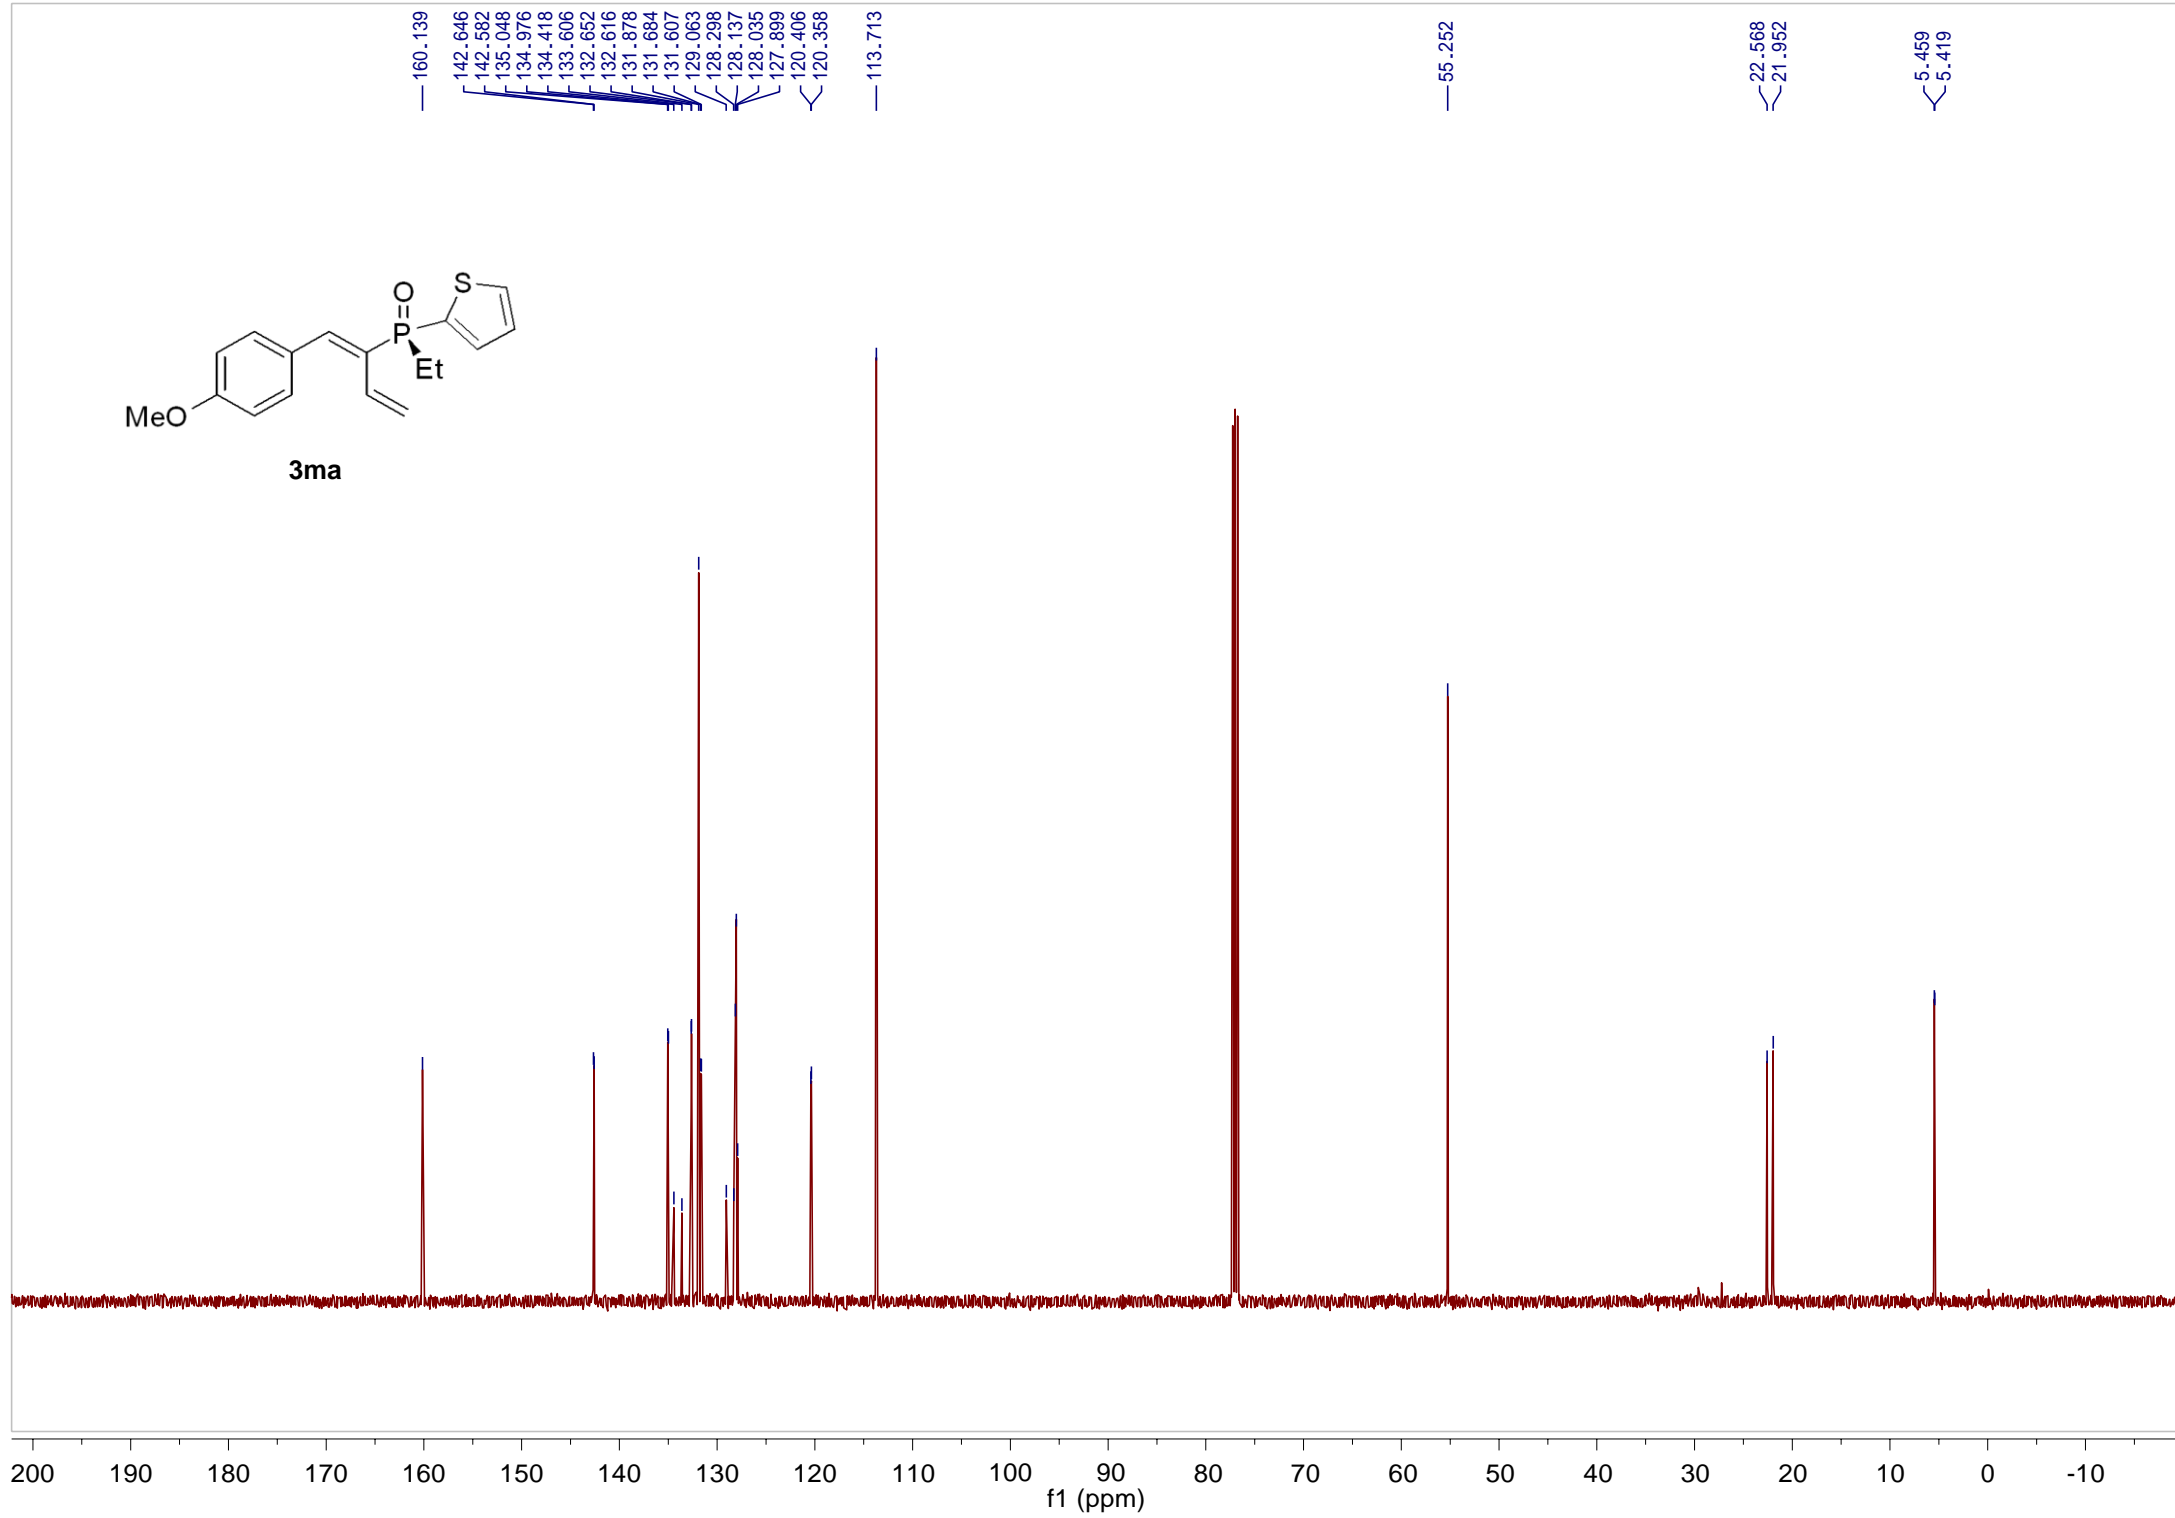

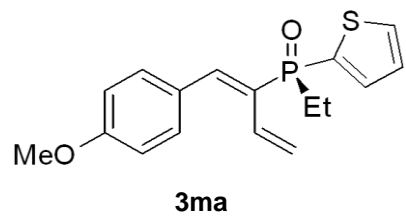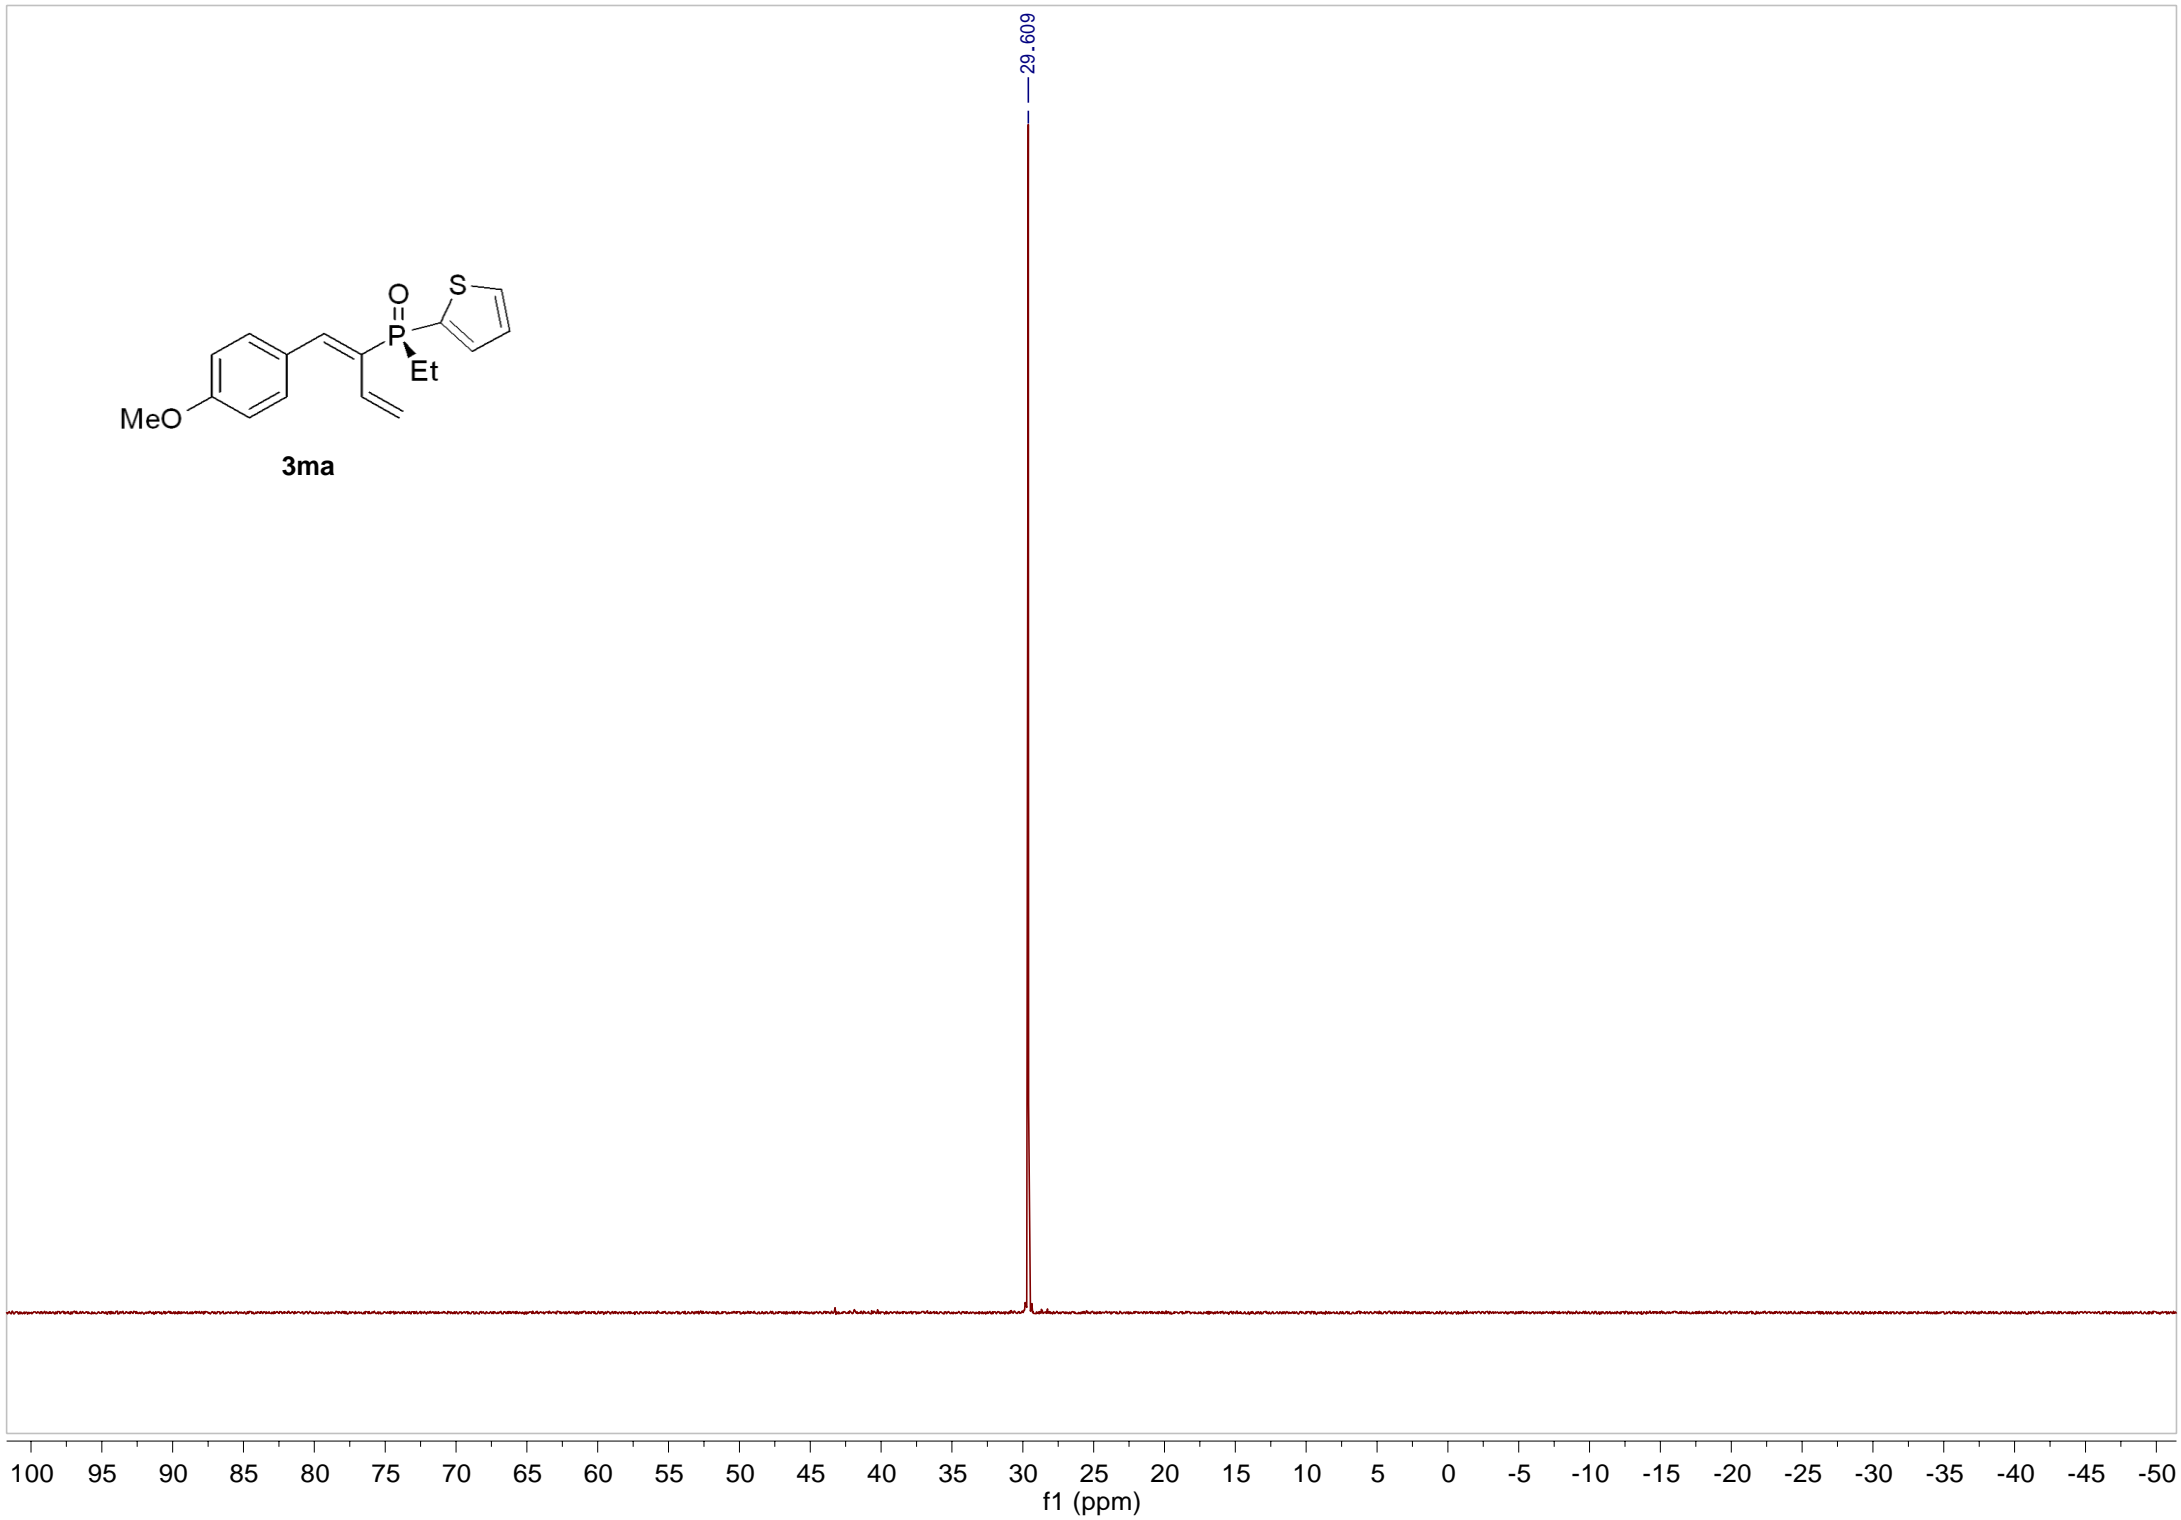

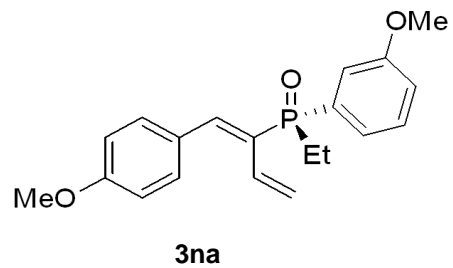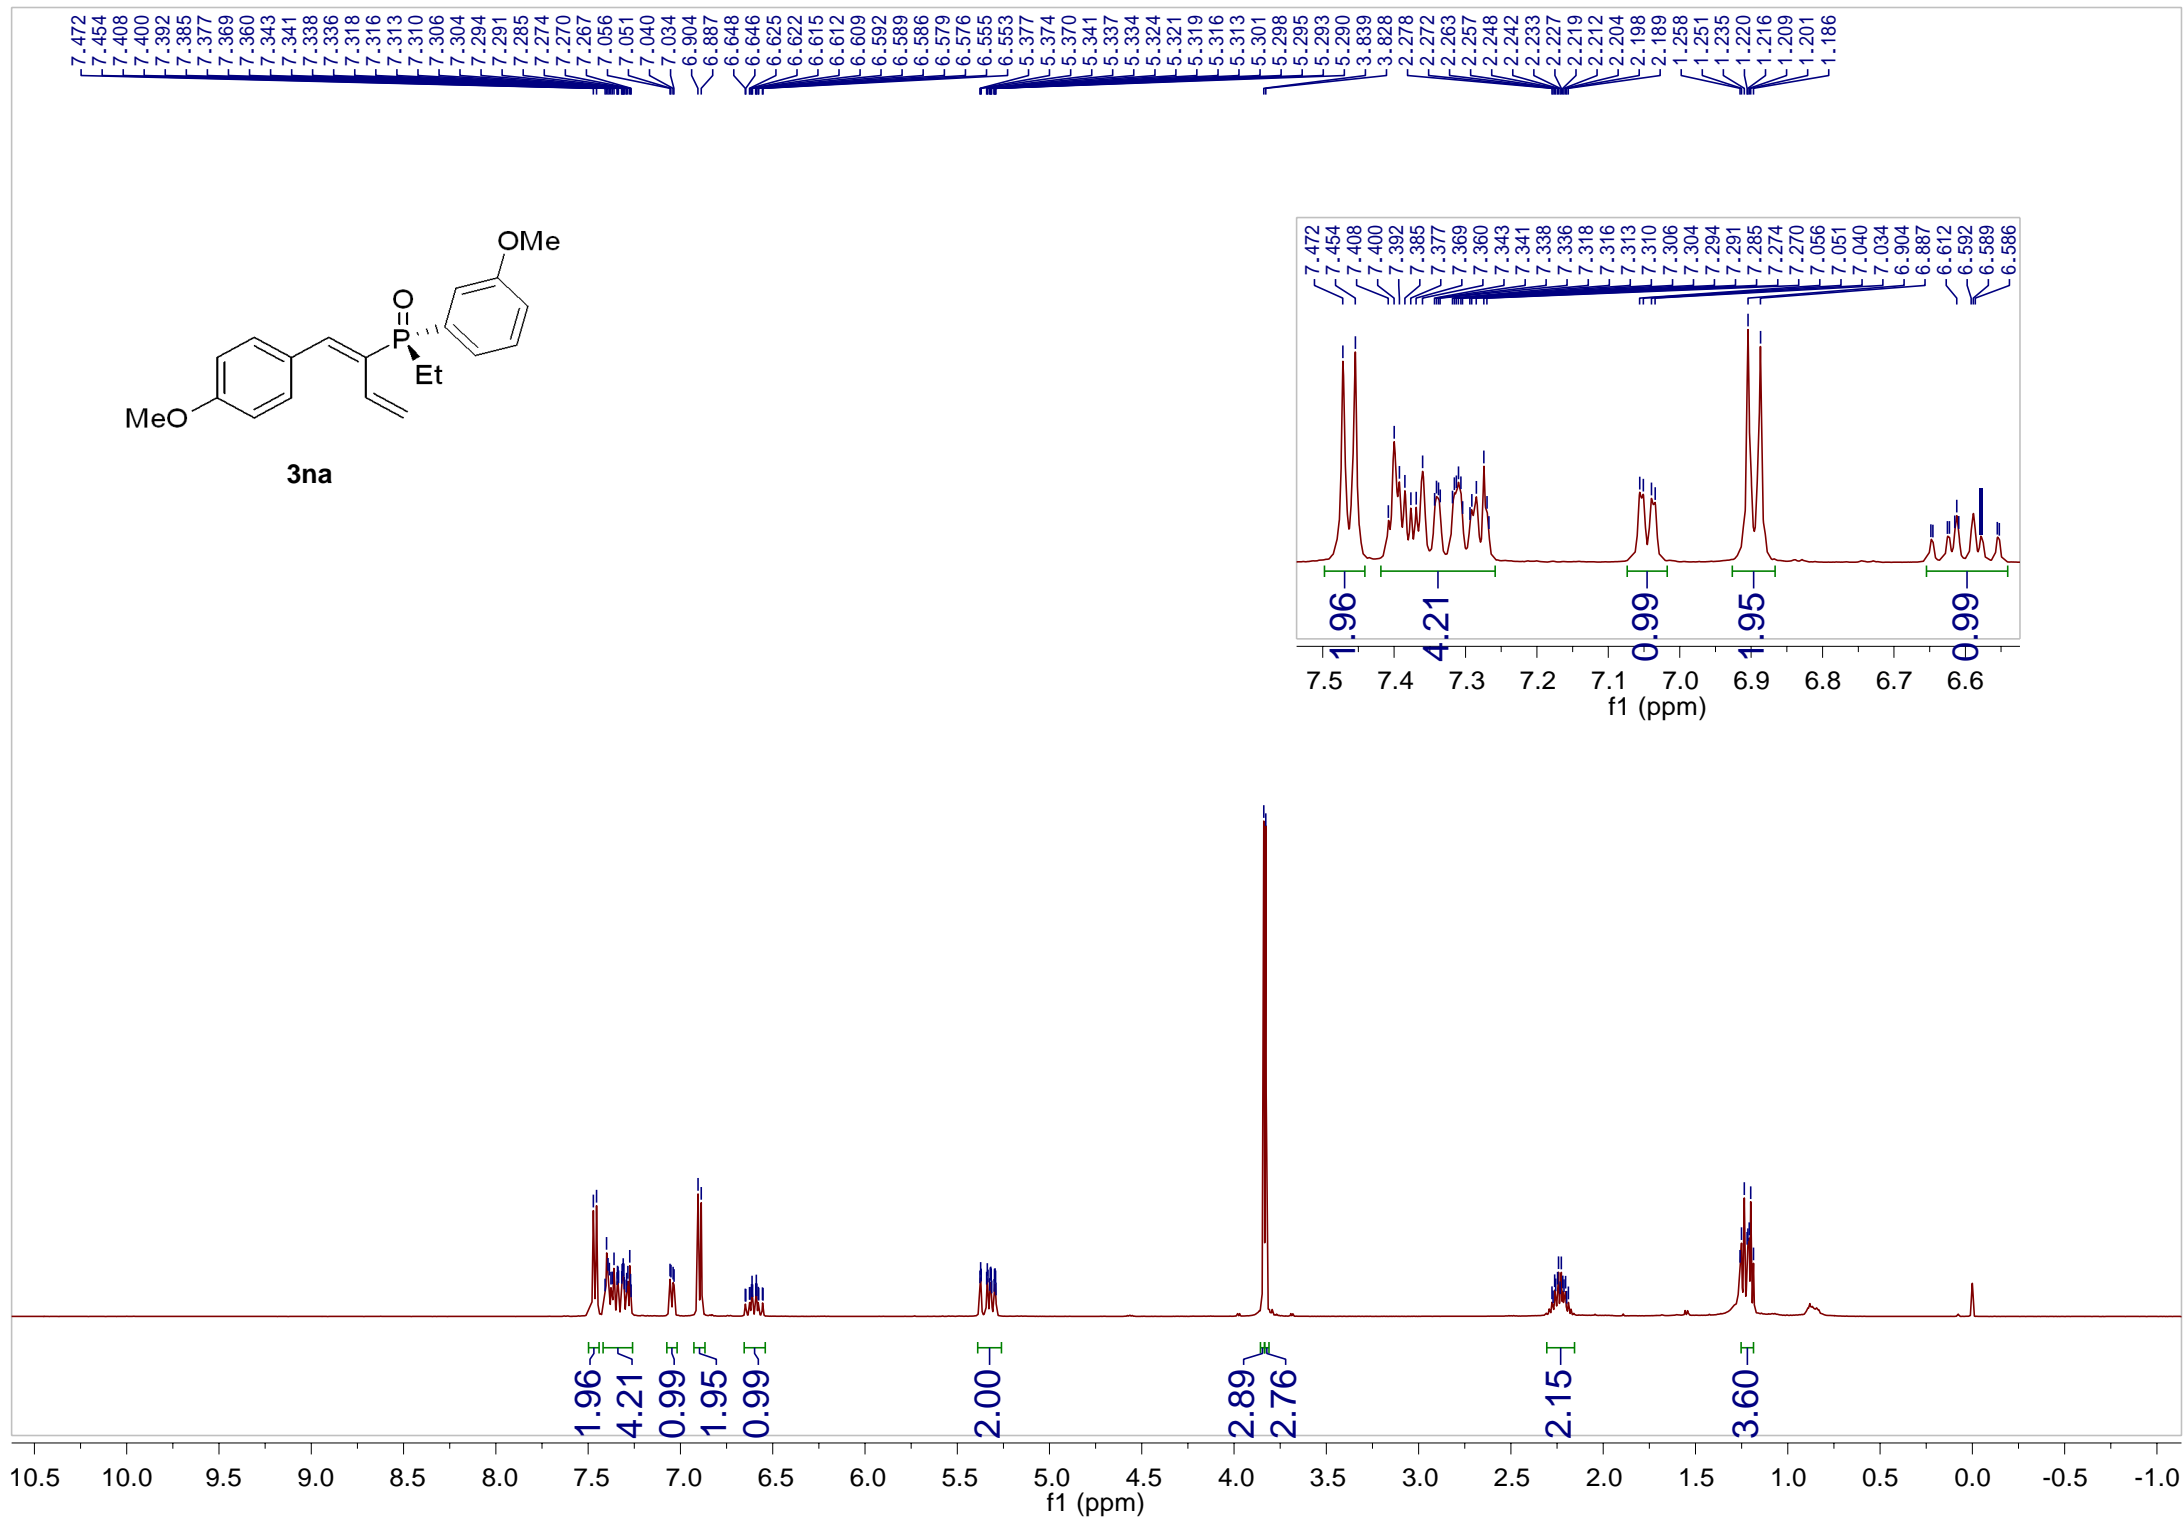

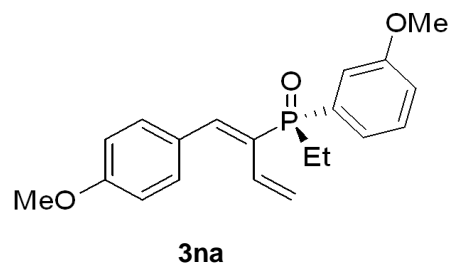

160.052  
 159.635  
 159.522  
 142.113  
 142.049  
 134.820  
 134.056  
 131.844  
 131.792  
 131.771  
 129.754  
 129.646  
 129.302  
 128.579  
 128.145  
 128.012  
 122.884  
 122.810  
 120.404  
 120.358  
 117.554  
 117.533  
 115.929  
 115.850  
 113.708

55.377  
 55.263

20.507  
 19.920

5.449  
 5.410

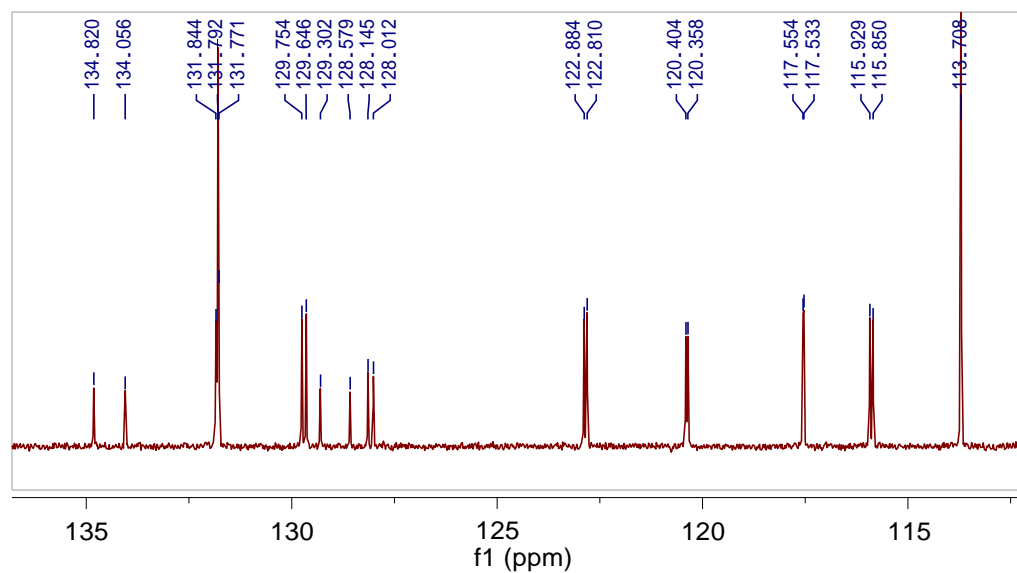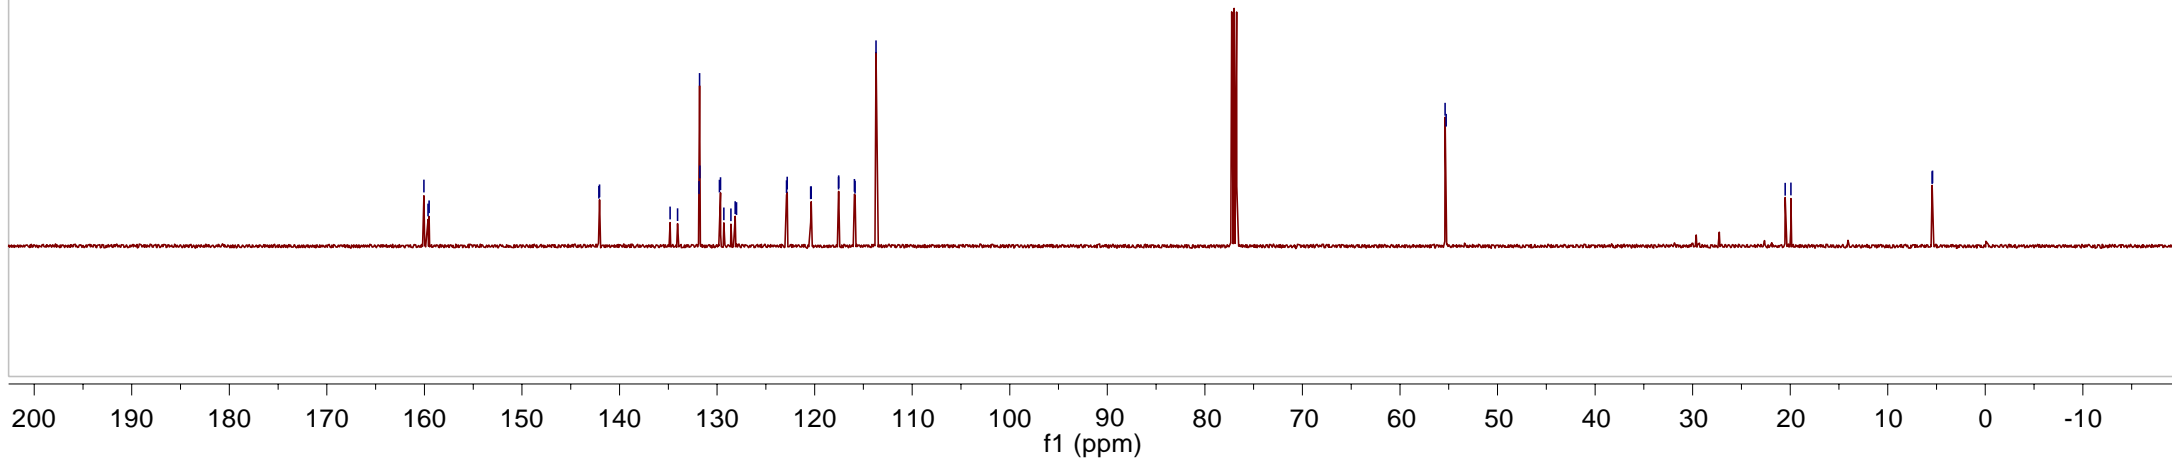

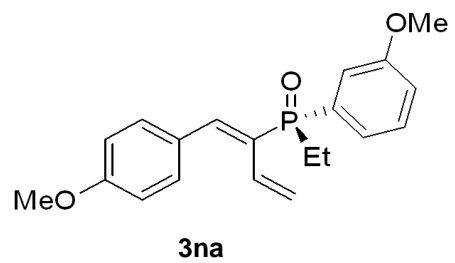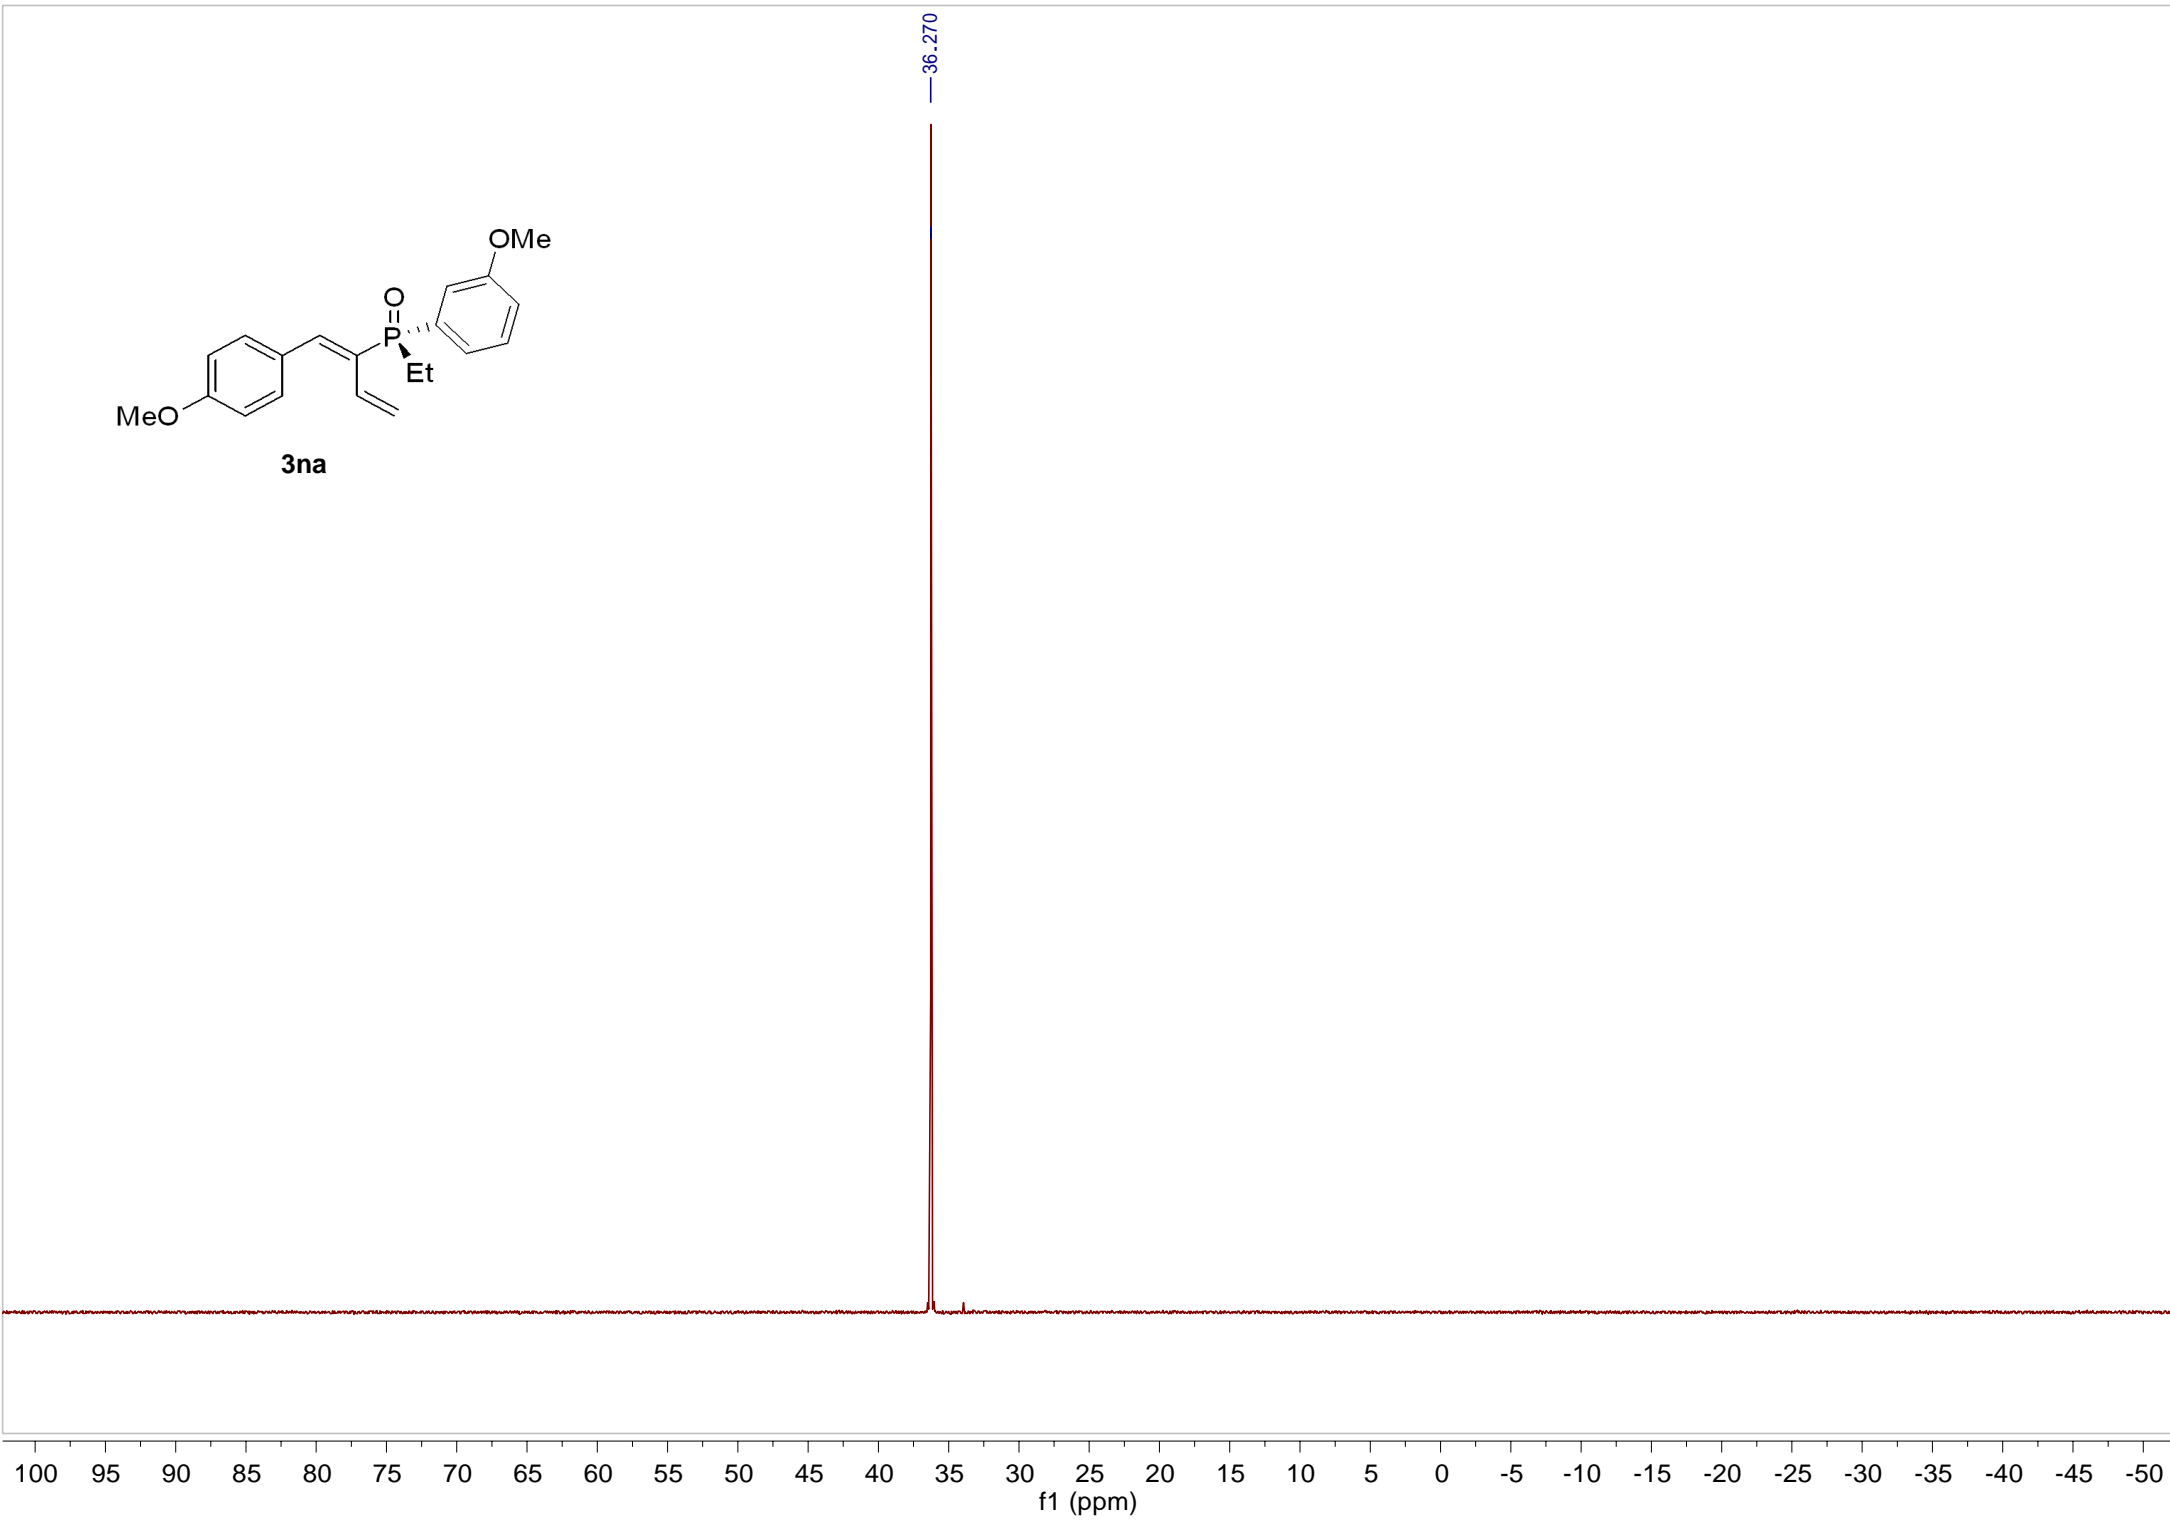

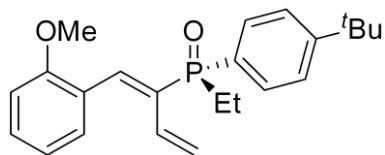

**3jb**

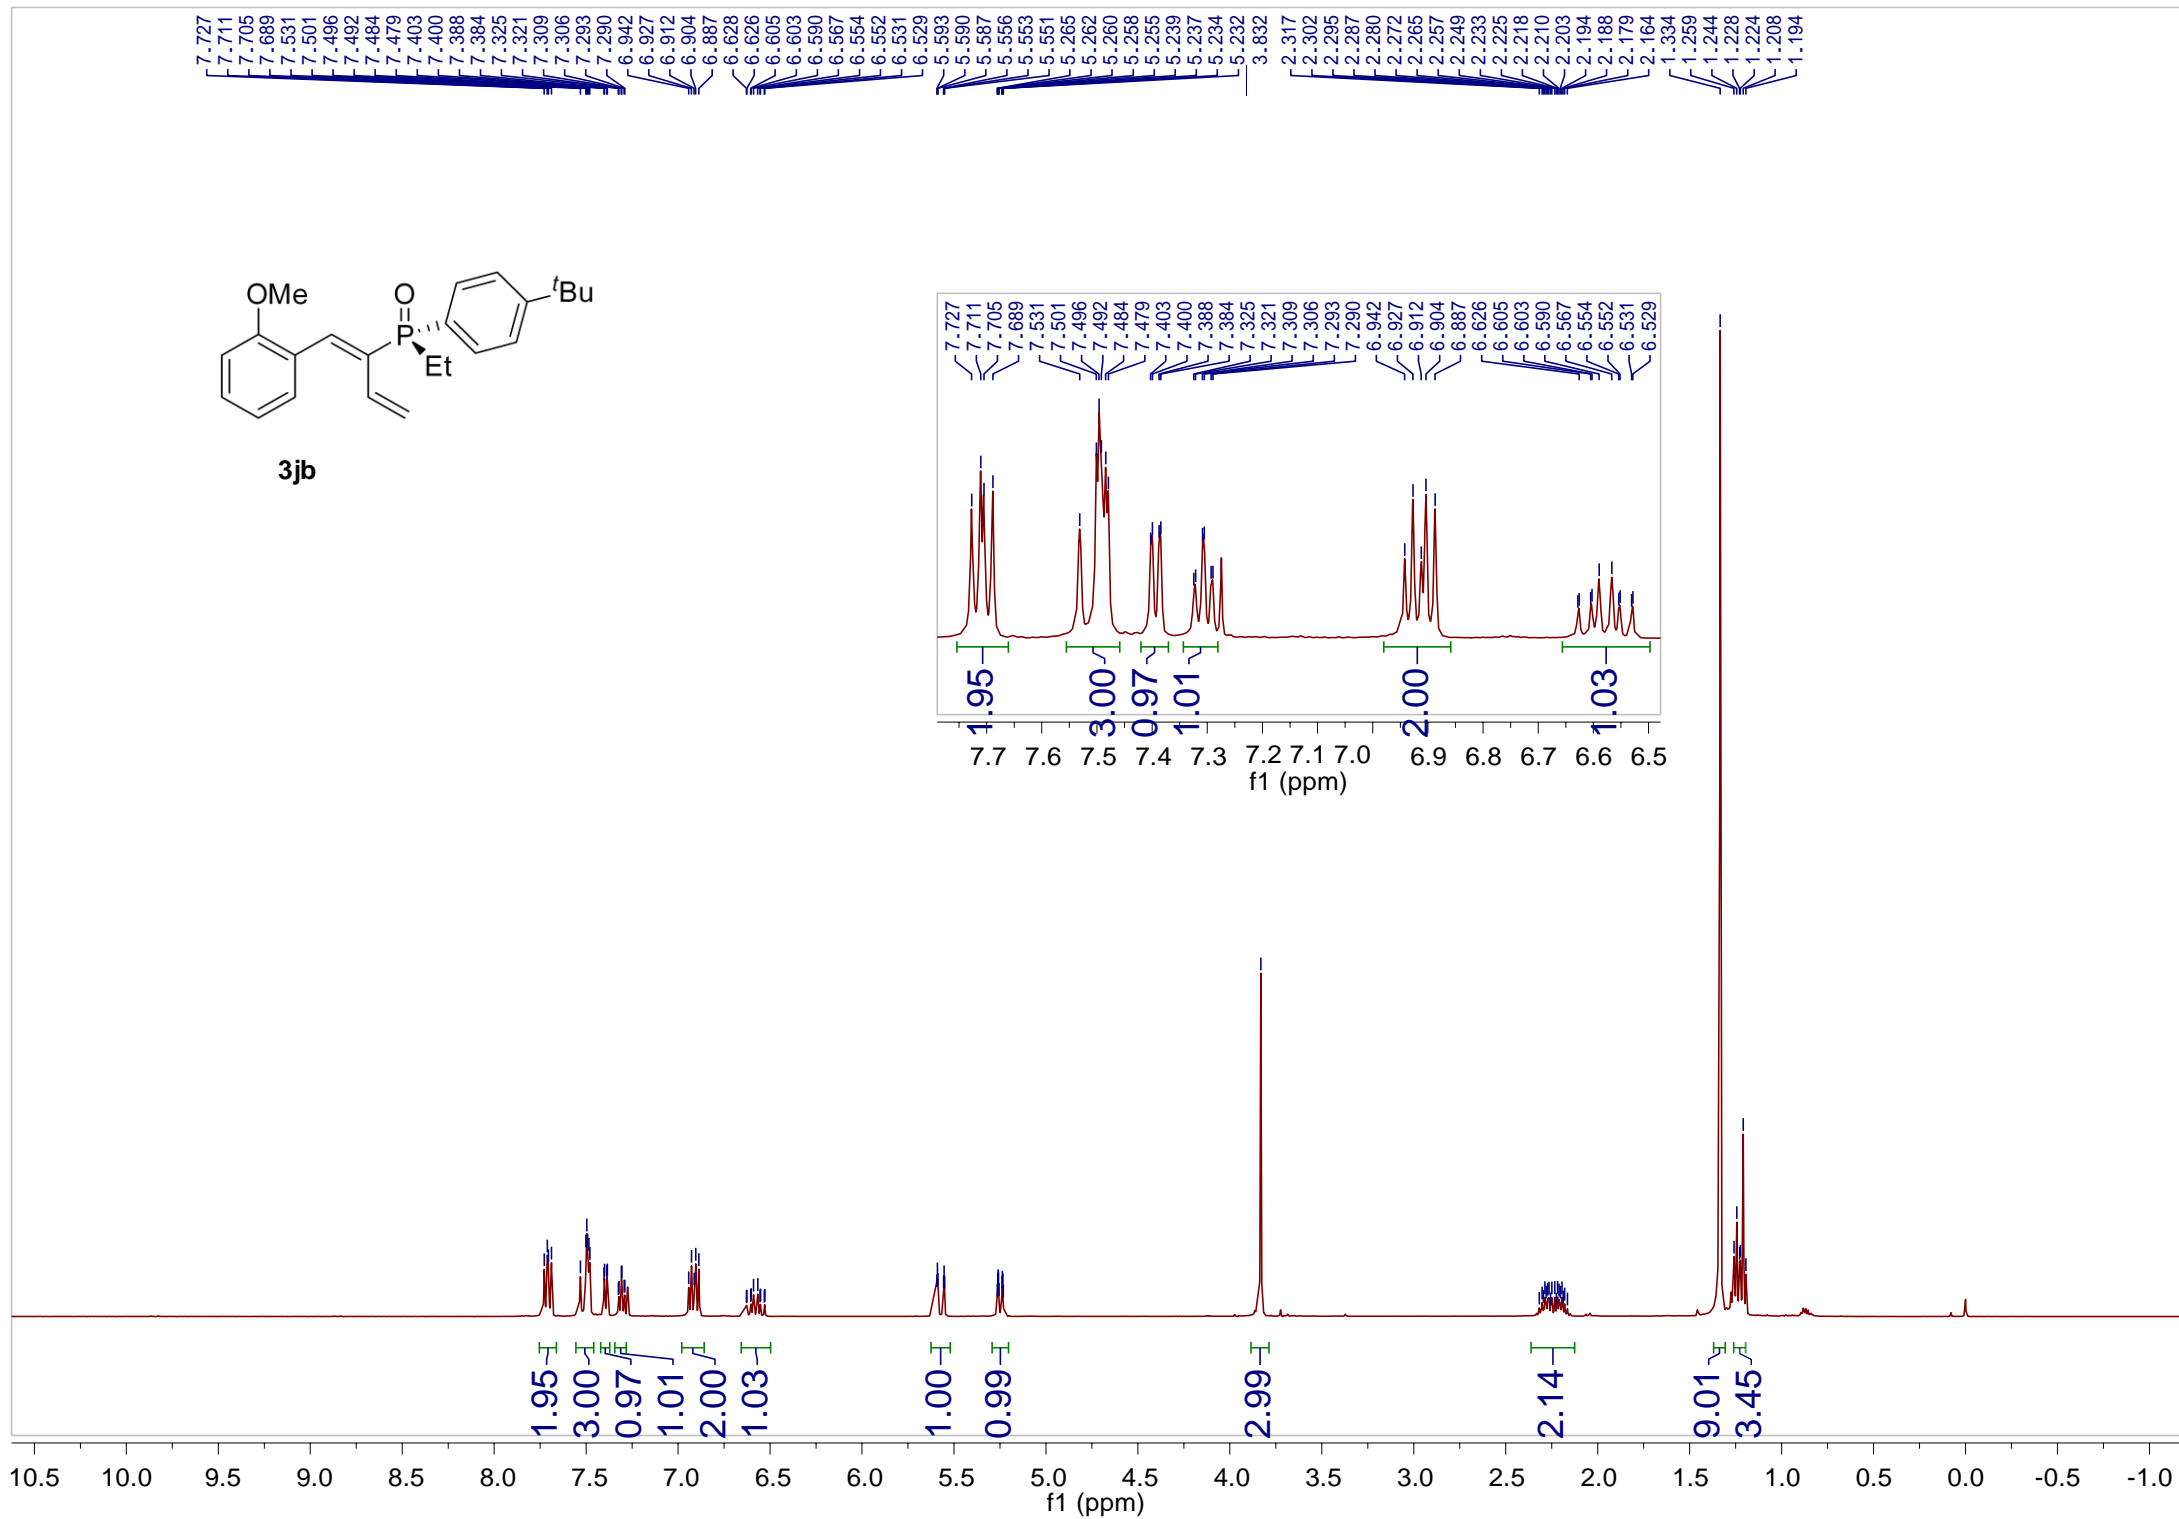

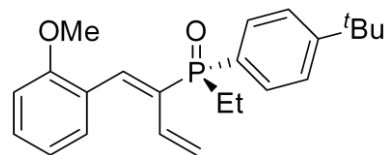

3jb

157.612  
154.809  
154.787  
138.219  
138.139  
131.589  
131.519  
130.911  
130.897  
130.784  
130.707  
130.152  
129.874  
129.086  
125.475  
125.380  
124.457  
124.327  
120.422  
120.380  
119.869  
110.507

55.414

34.872

31.072

21.454

20.869

5.606

5.566

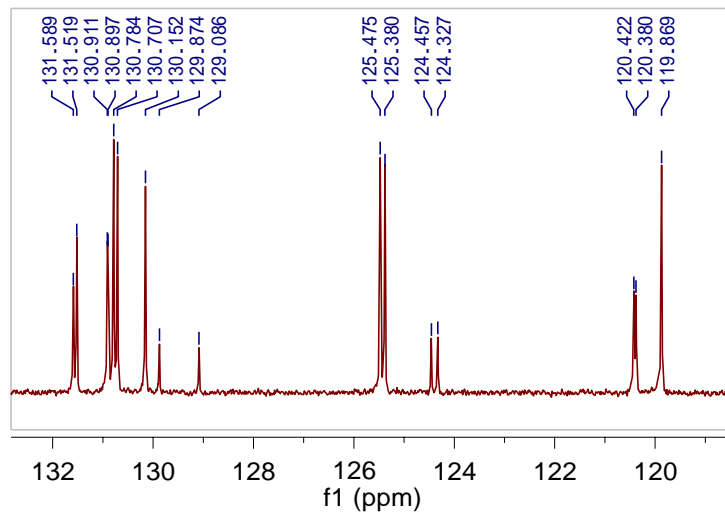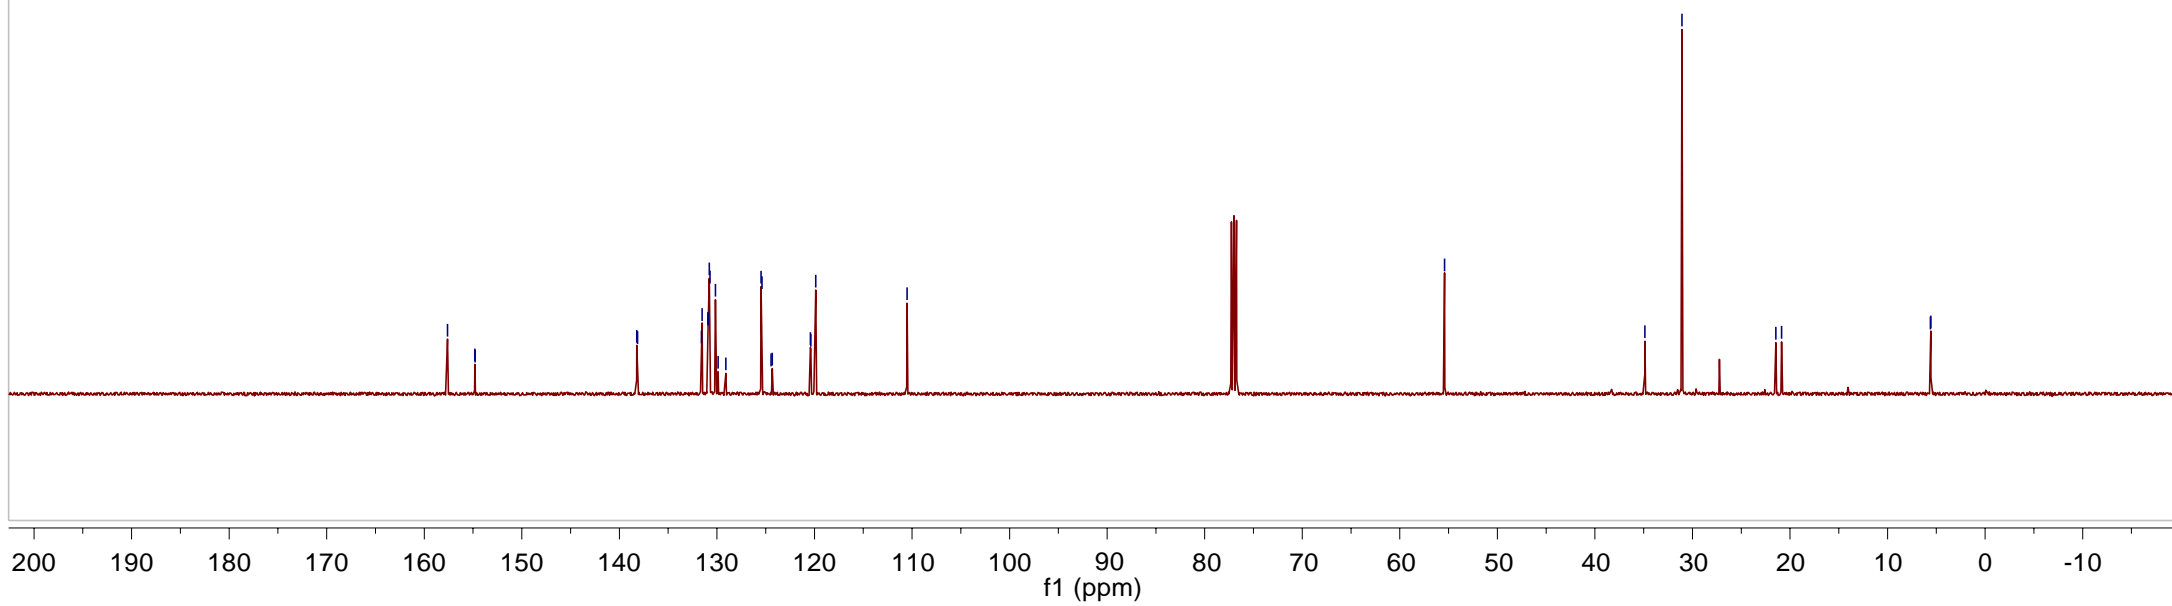



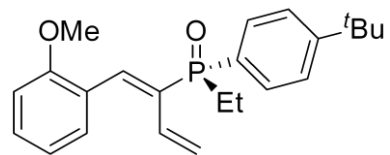

3jb

— 37.184

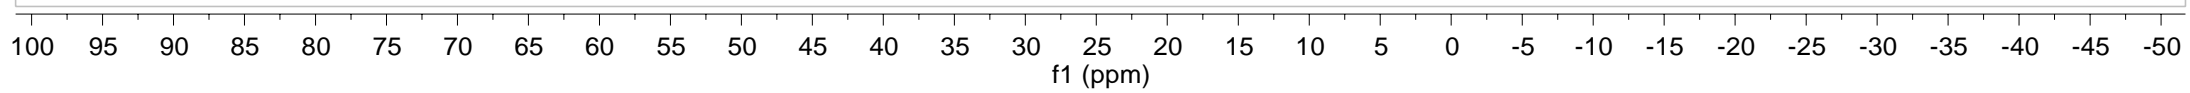

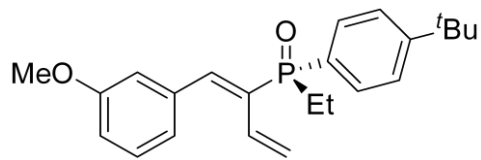

**3jc**

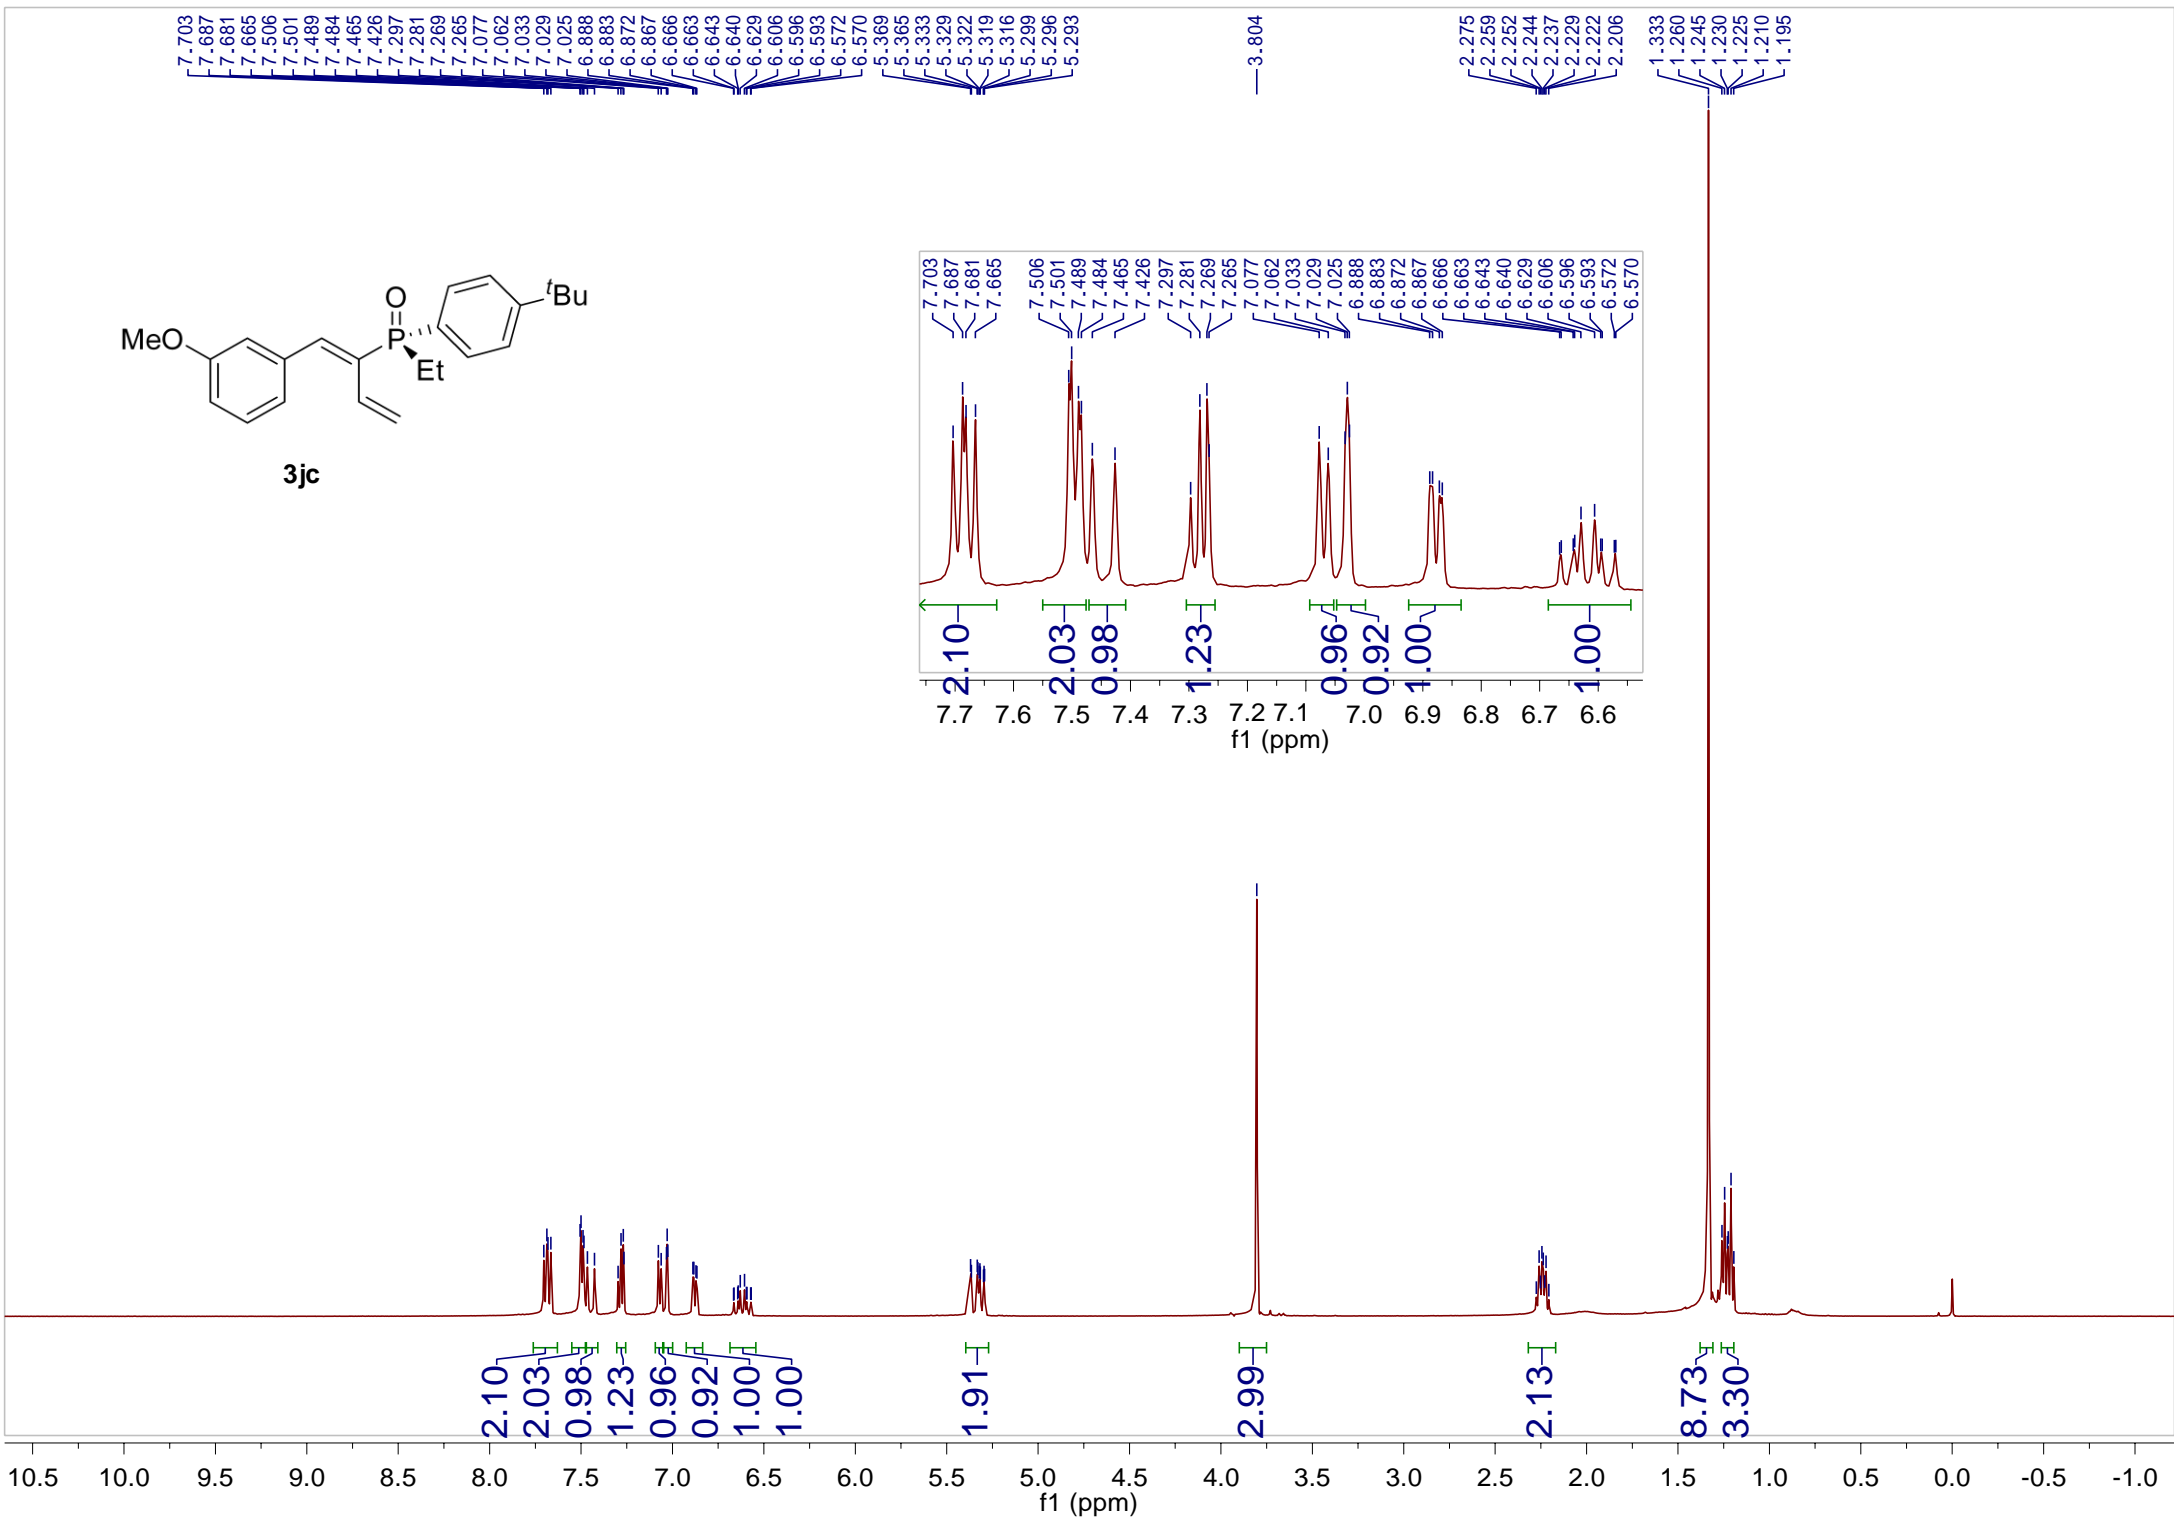

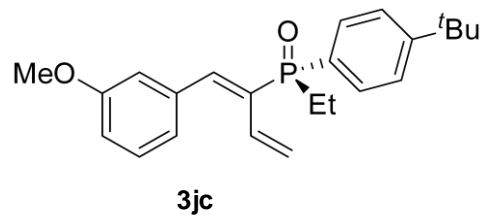

159.375  
155.174  
155.152  
142.552  
142.491  
136.910  
136.781  
132.355  
131.766  
131.696  
131.650  
130.755  
130.679  
129.967  
129.307  
129.176  
125.714  
125.620  
122.582  
120.829  
120.785  
115.271  
114.573

55.297

34.990

31.129

20.550

19.963

5.523

5.484

190 180 170 160 150 140 130 120 110 100 90 80 70 60 50 40 30 20 10 0 -10

f1 (ppm)

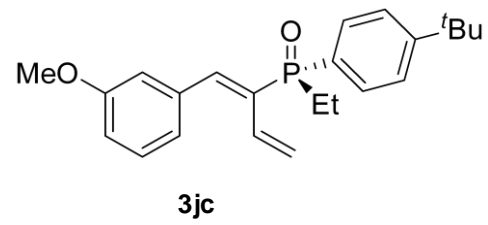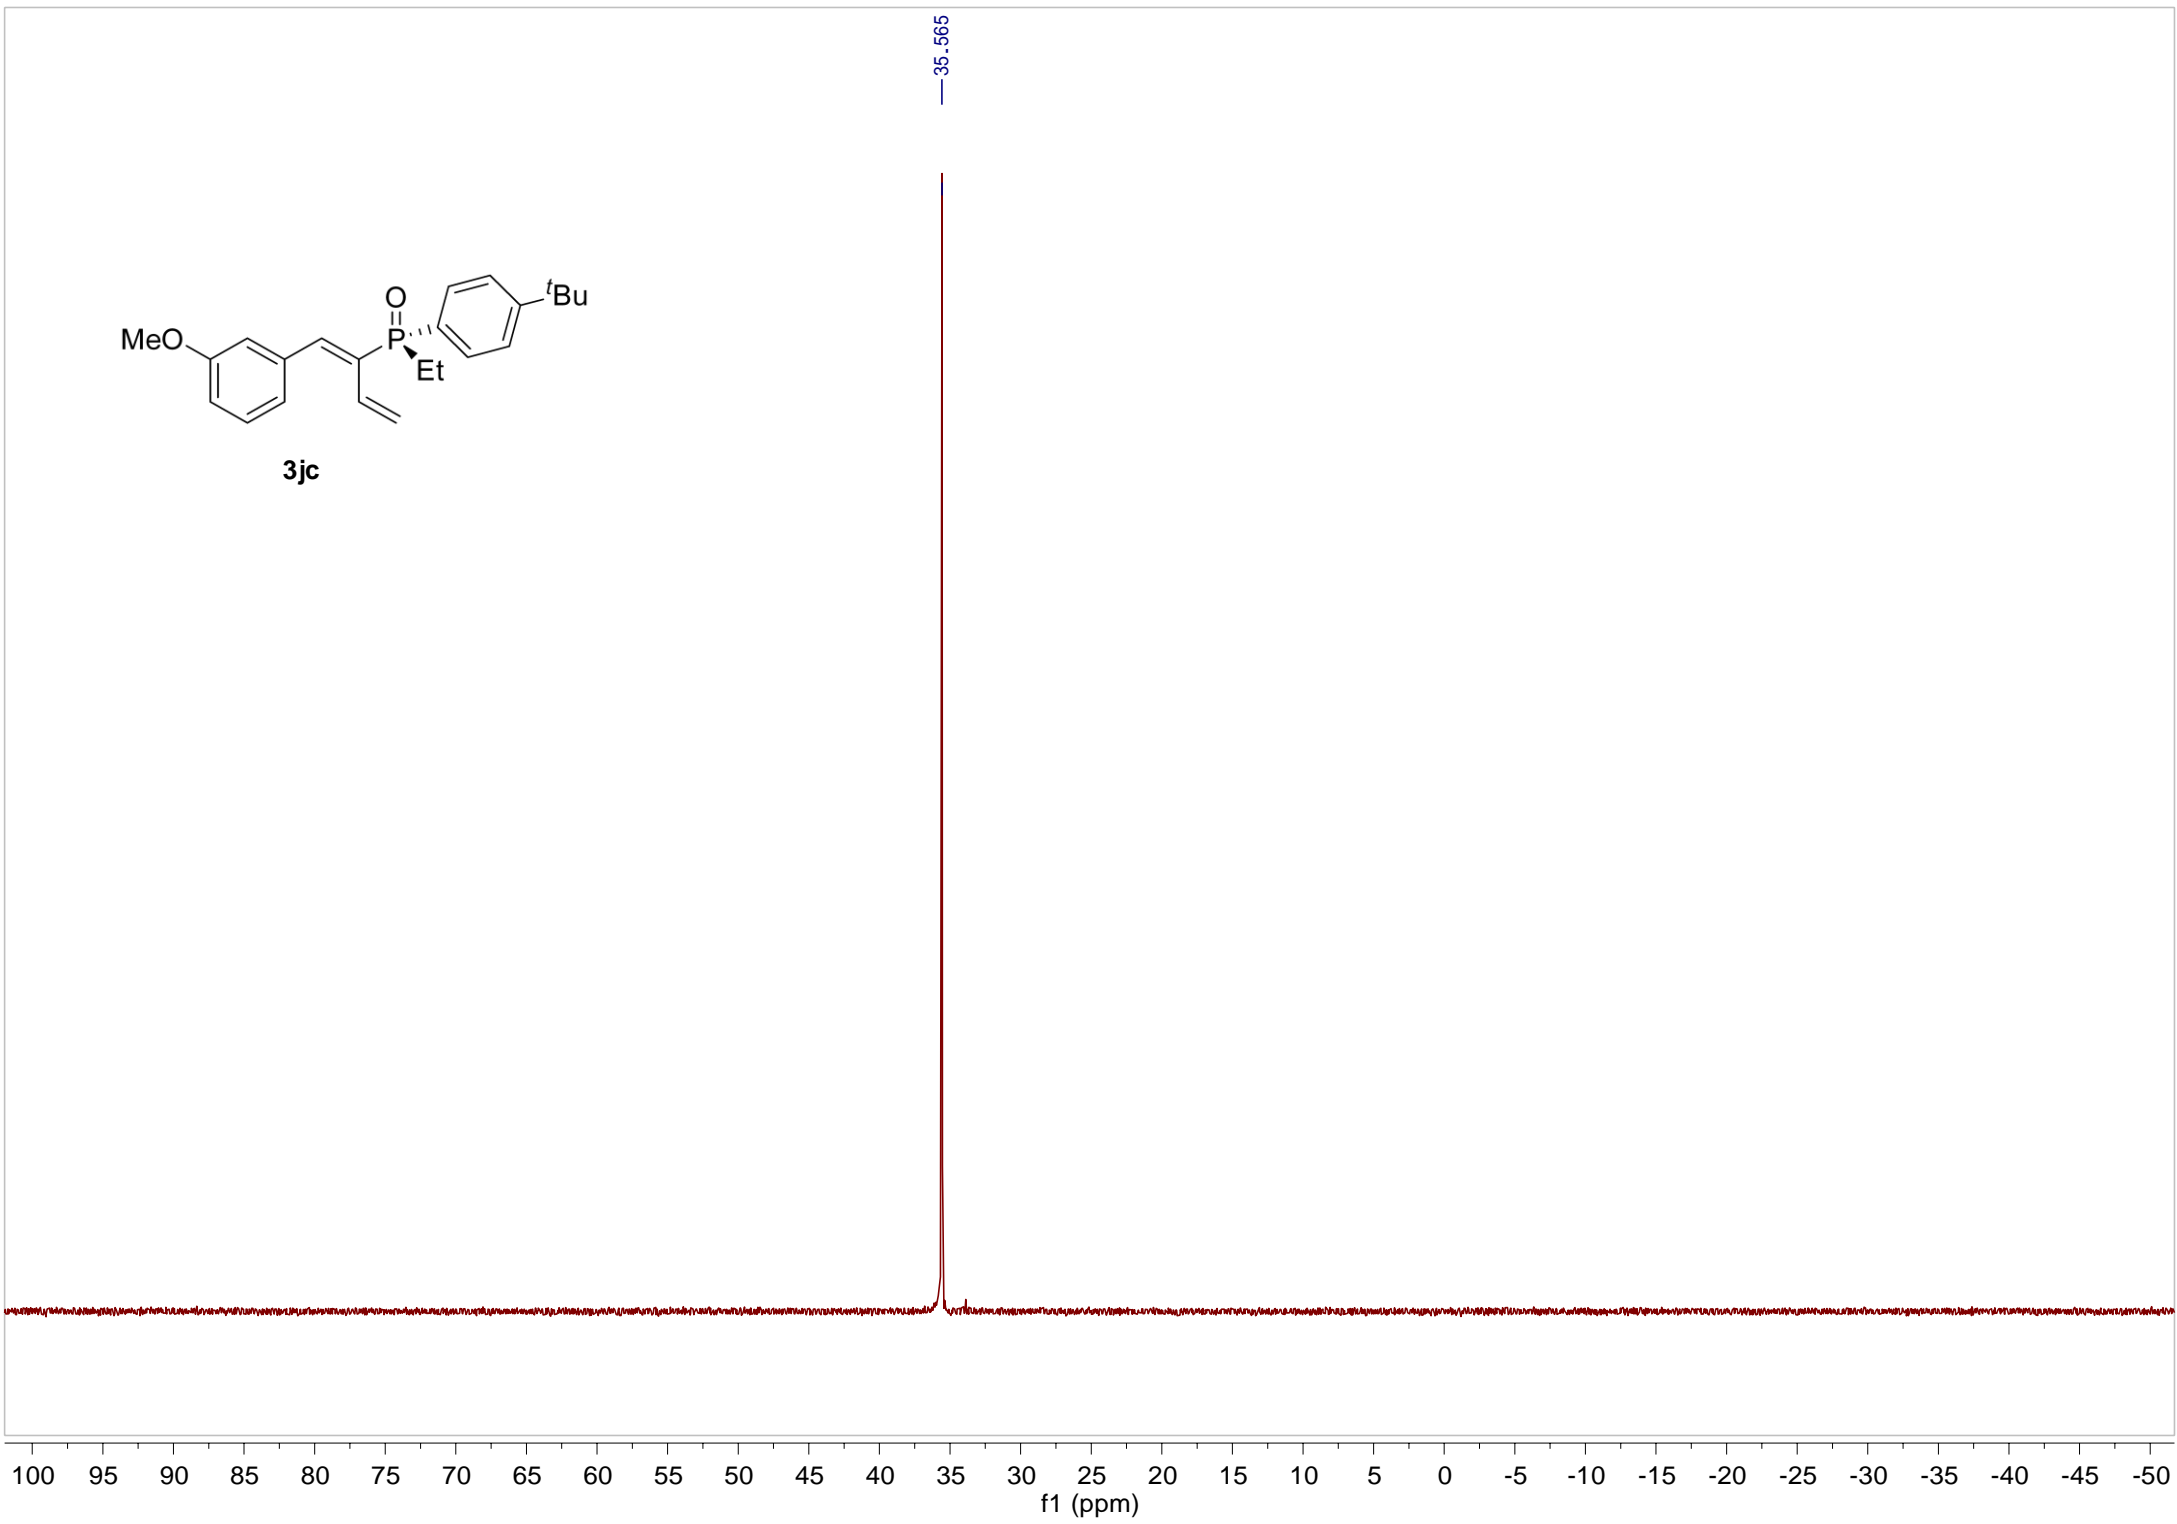

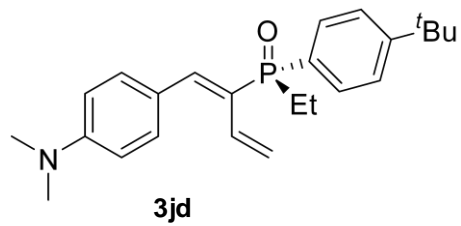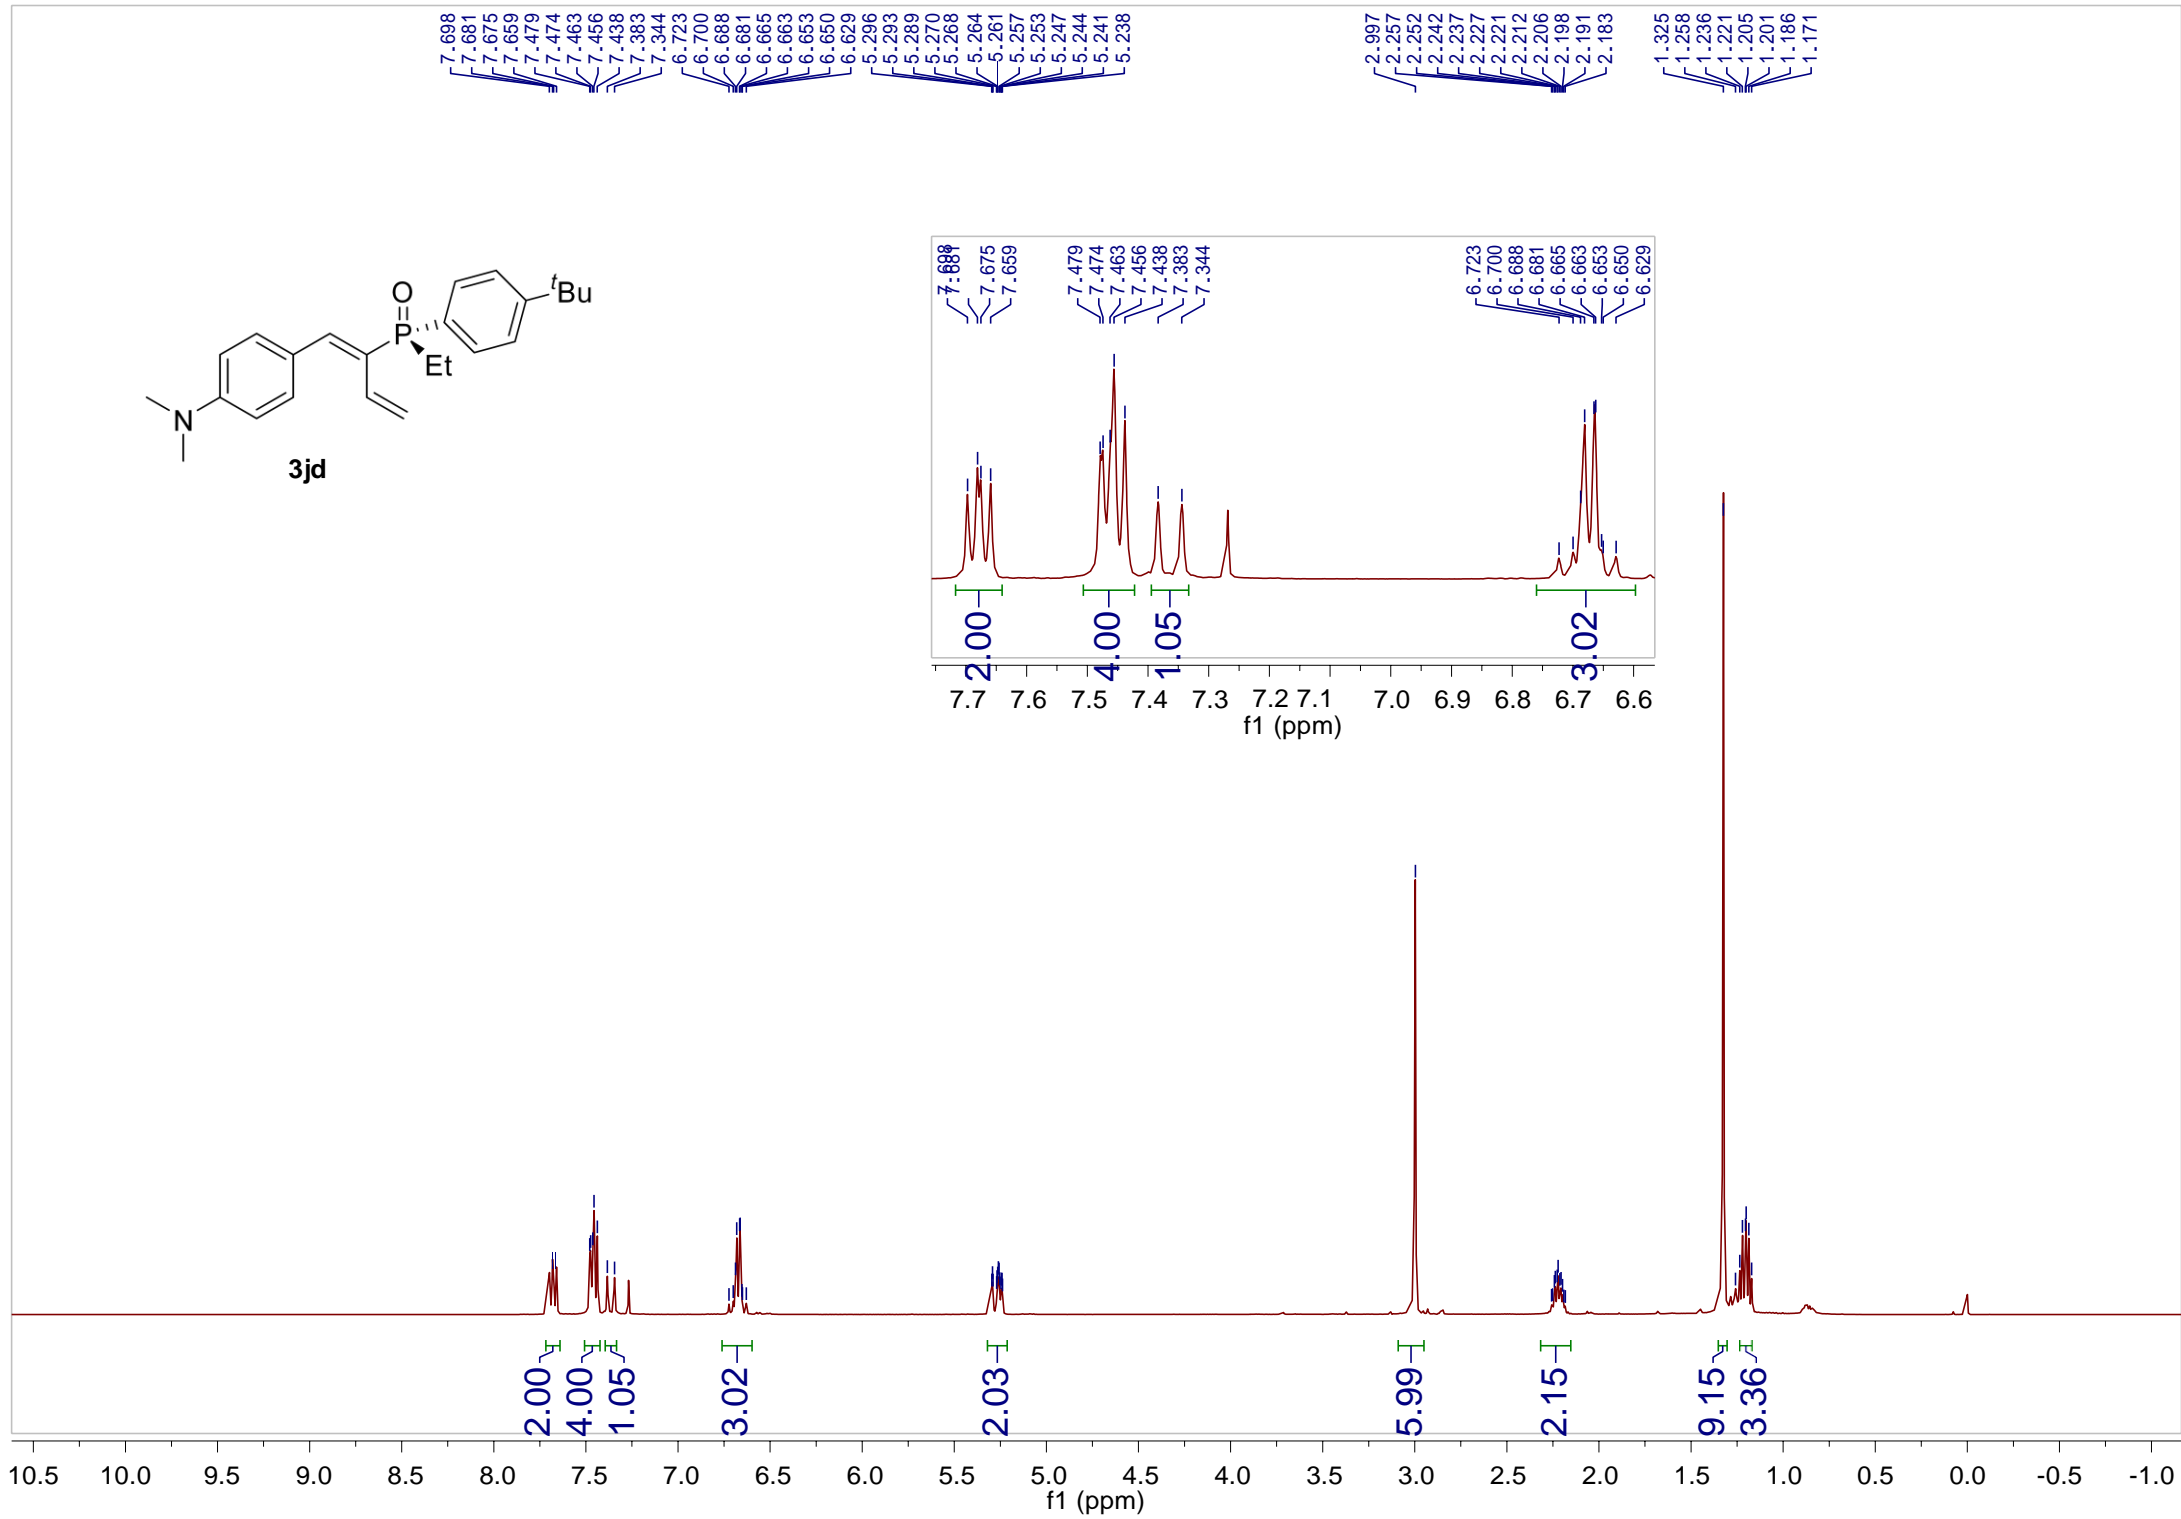

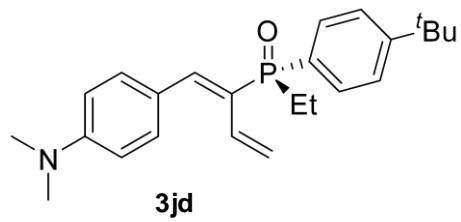

154.701  
154.680  
150.540  
142.873  
142.811  
132.607  
132.532  
131.852  
130.734  
130.694  
130.617  
129.945  
126.010  
125.478  
125.385  
125.271  
123.639  
123.506  
119.192  
119.147  
111.379

40.099  
34.863  
31.074  
20.386  
19.797  
5.499  
5.461

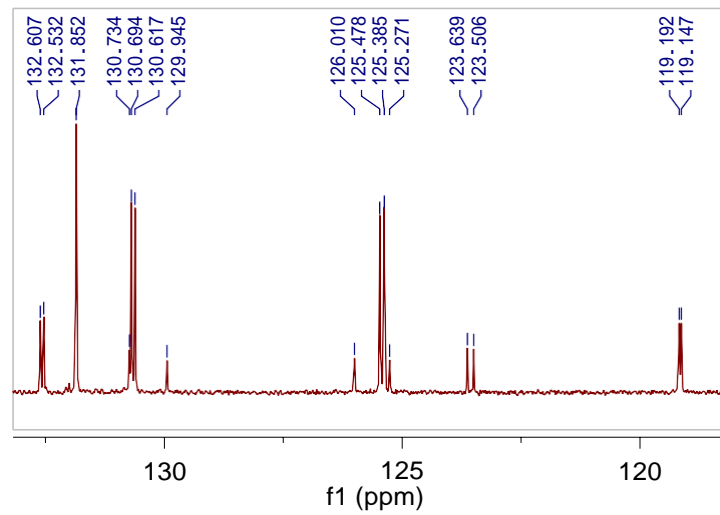

210 200 190 180 170 160 150 140 130 120 110 100 90 80 70 60 50 40 30 20 10 0 -10

f1 (ppm)

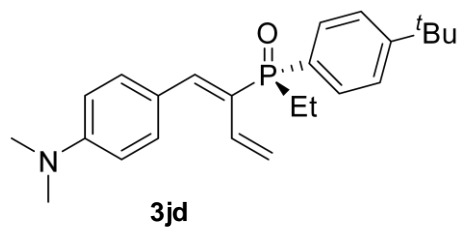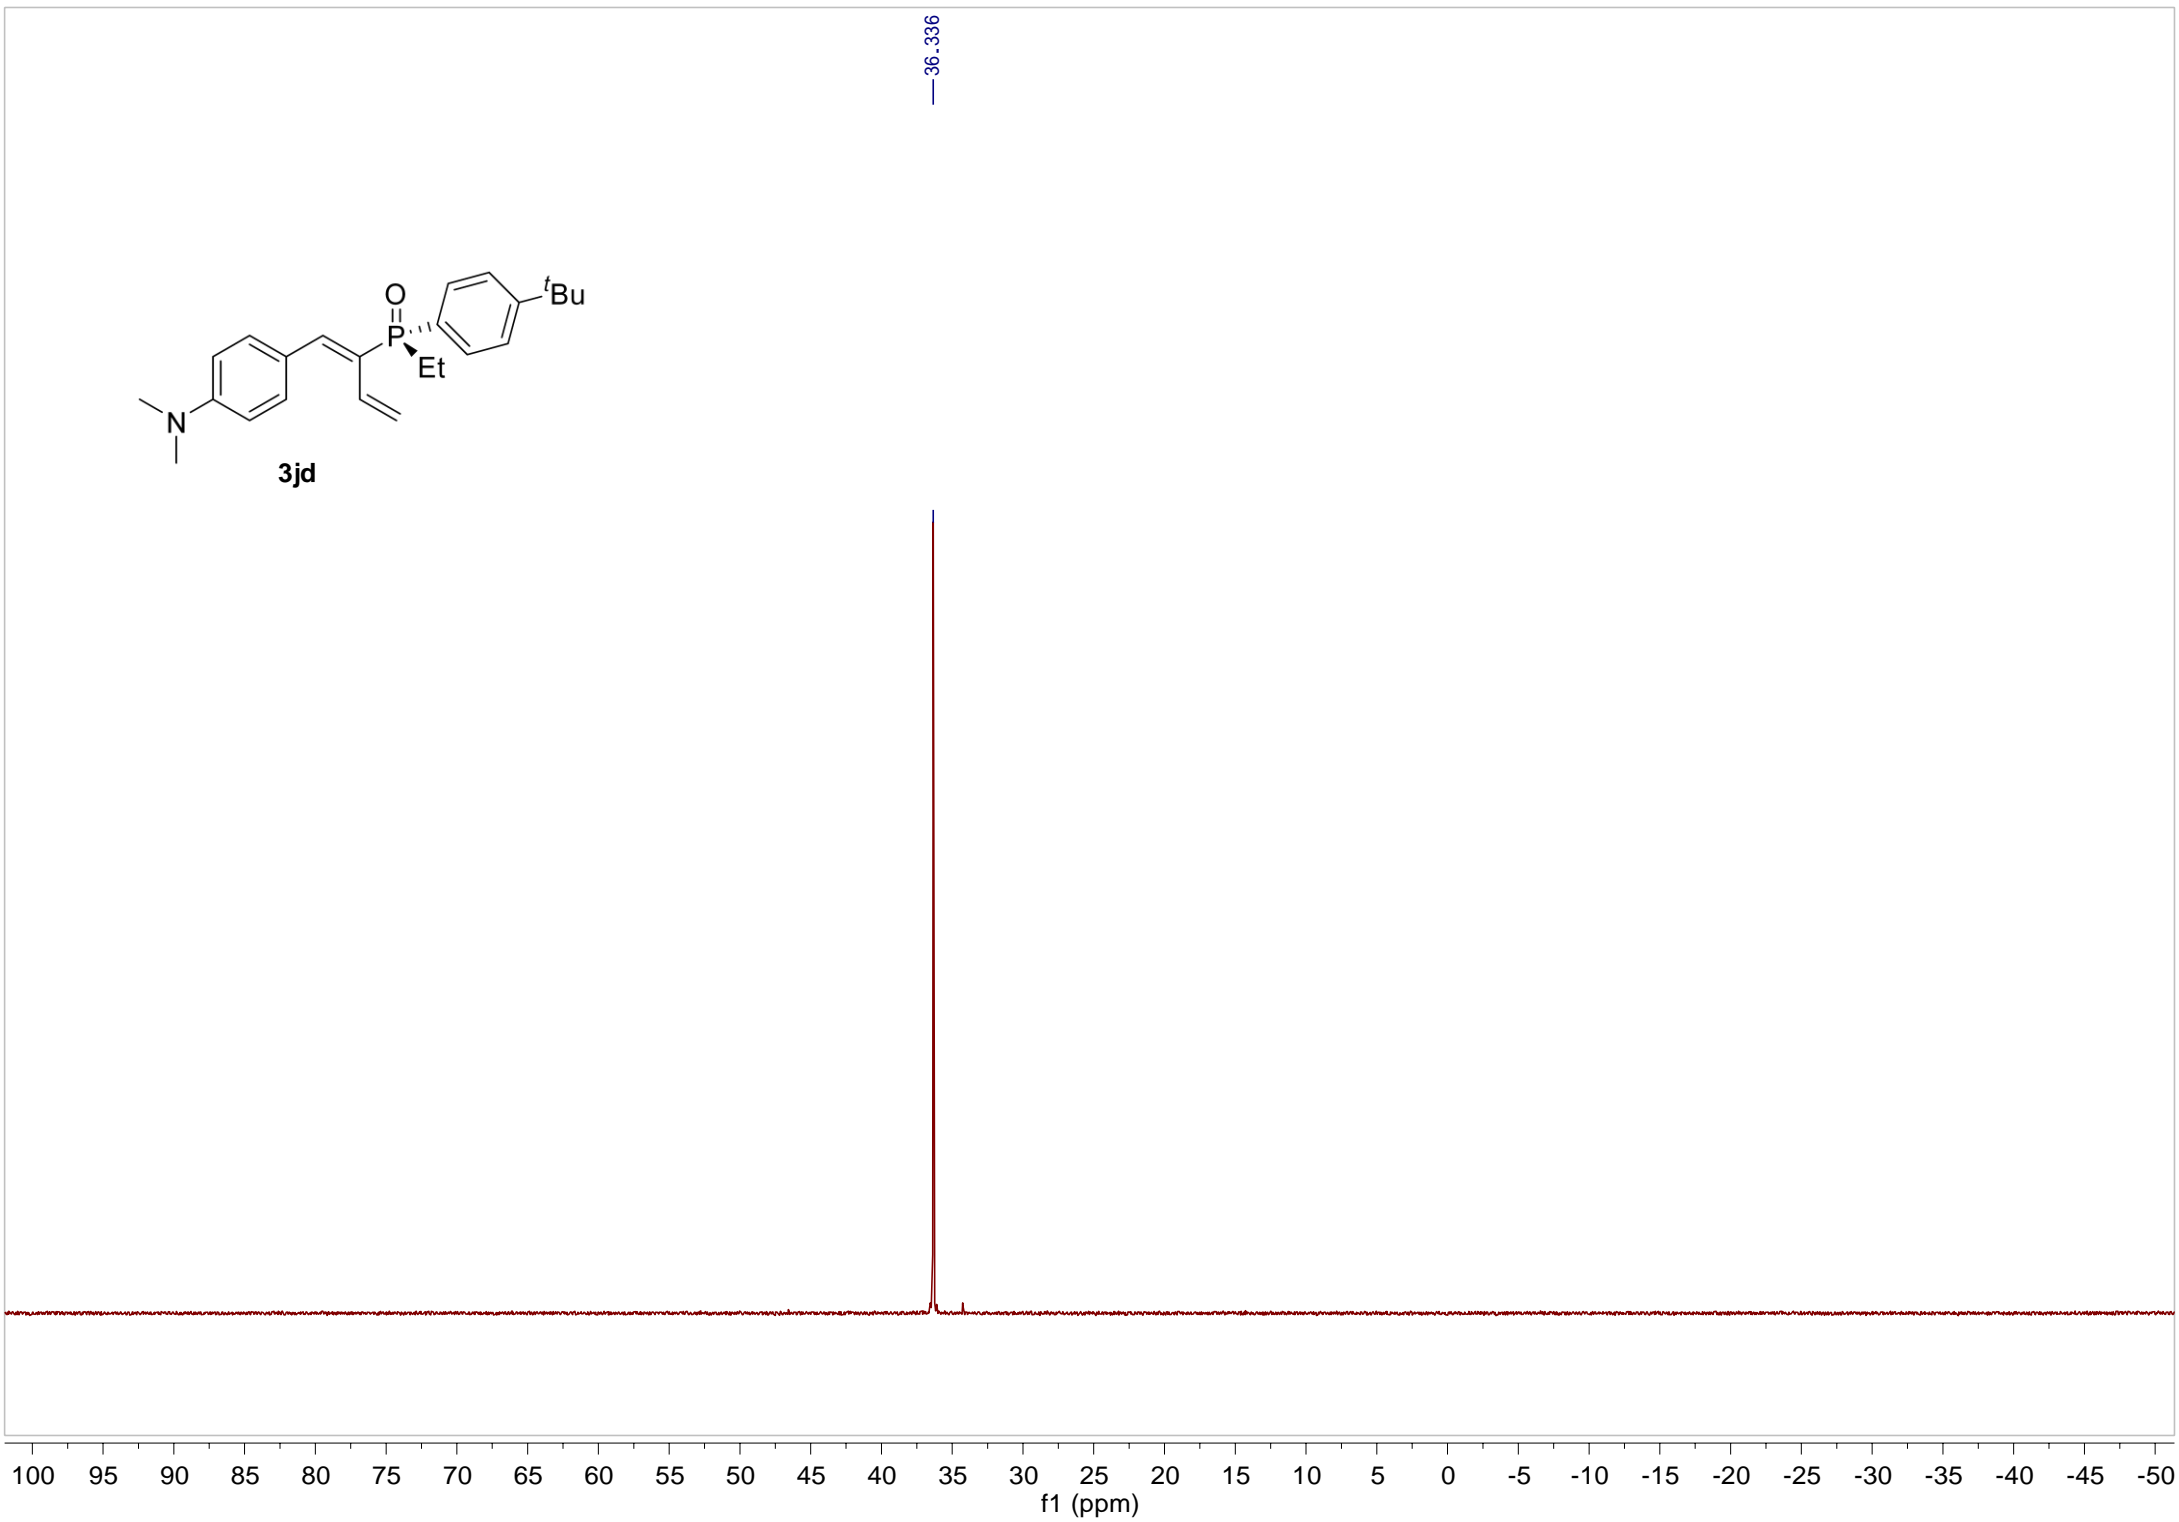

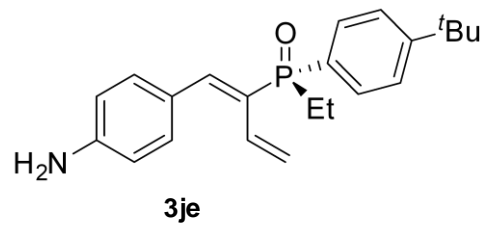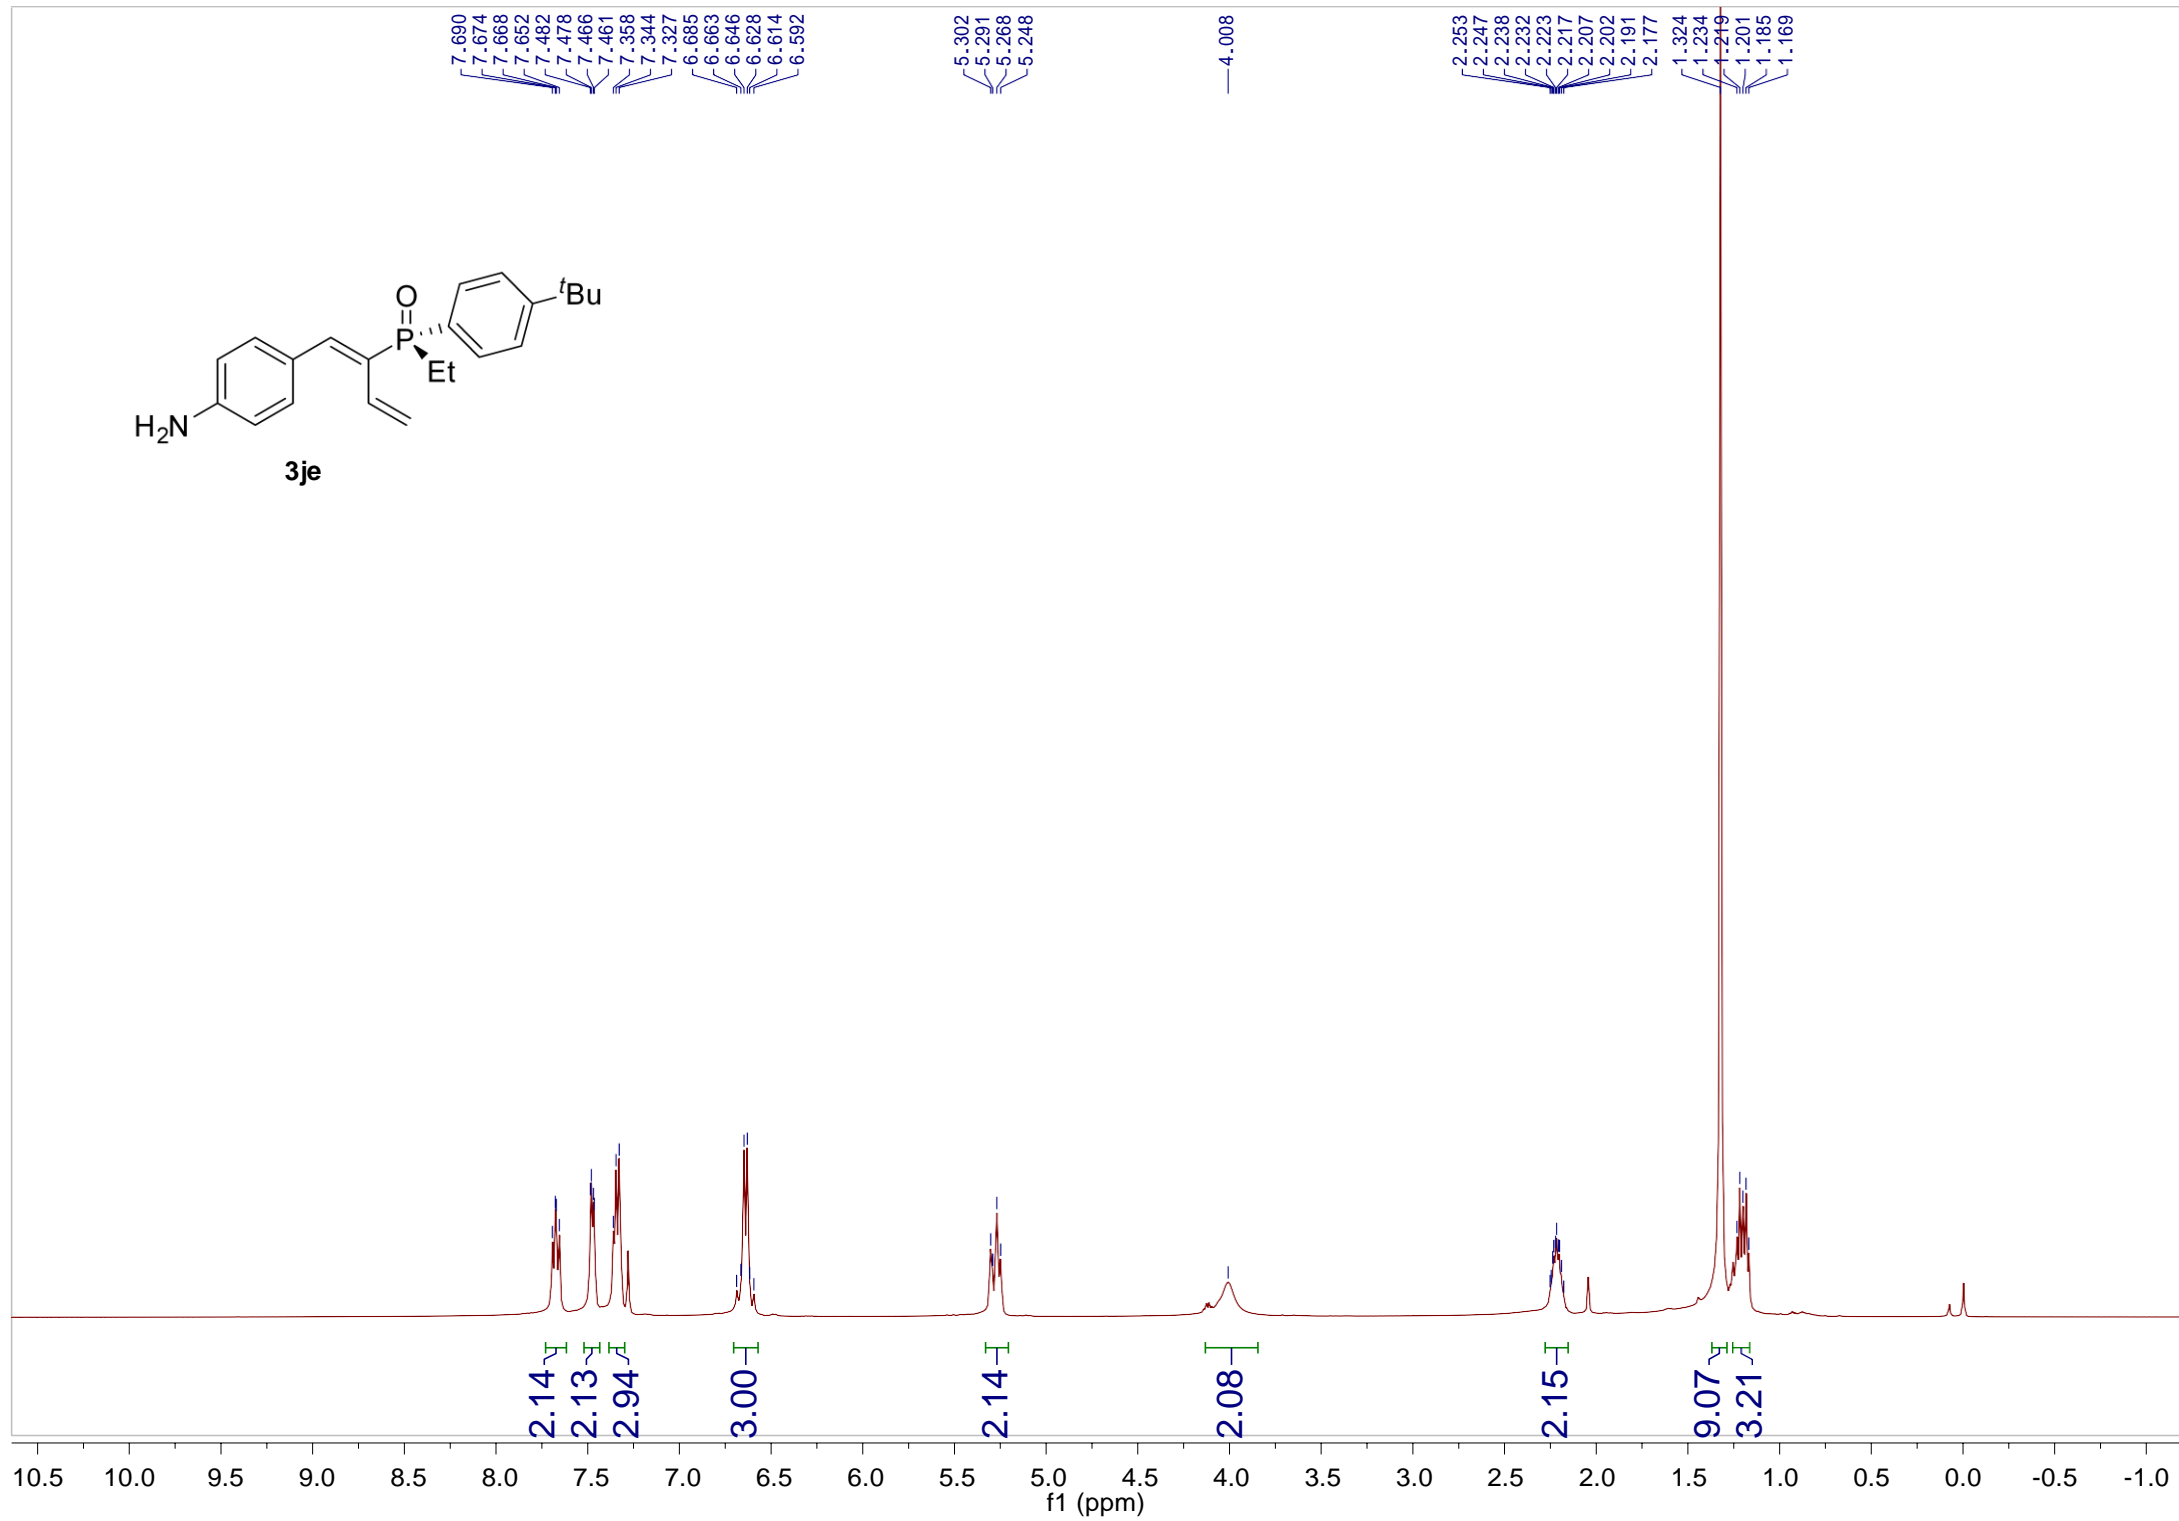



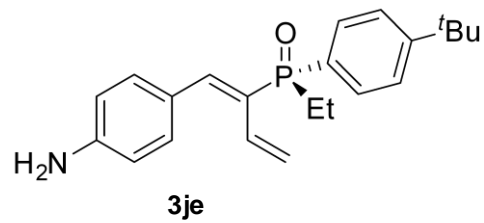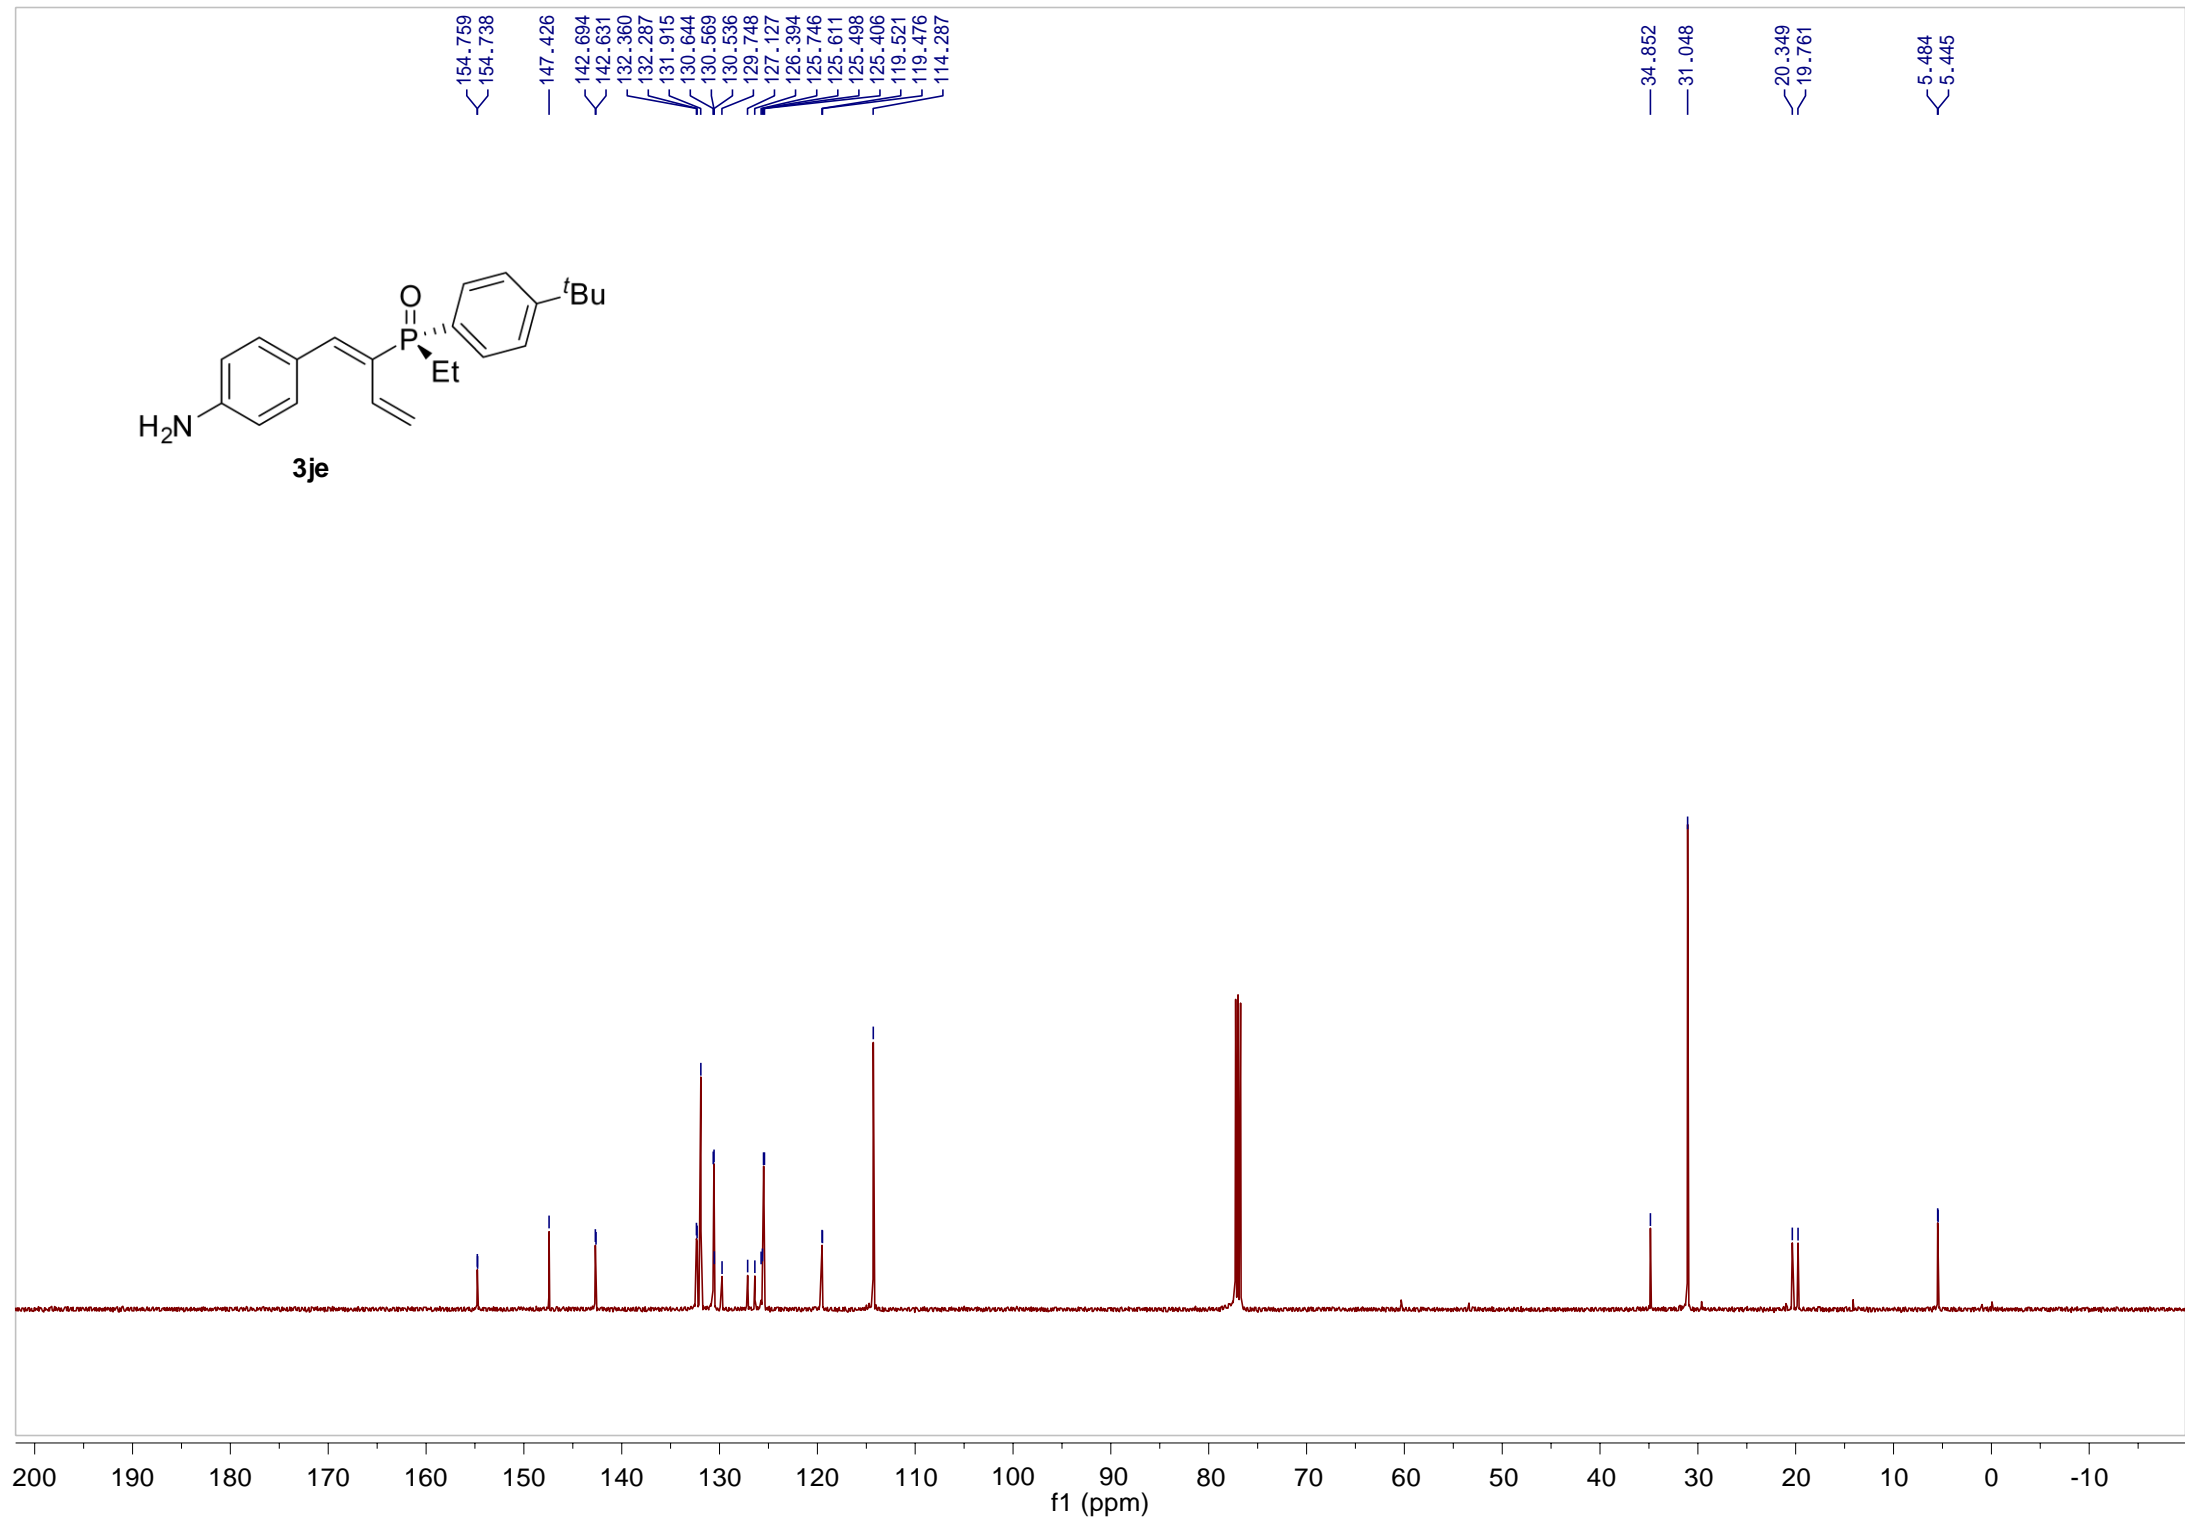

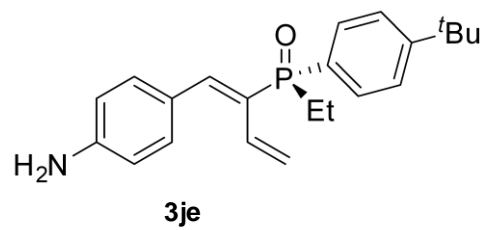

—36.133

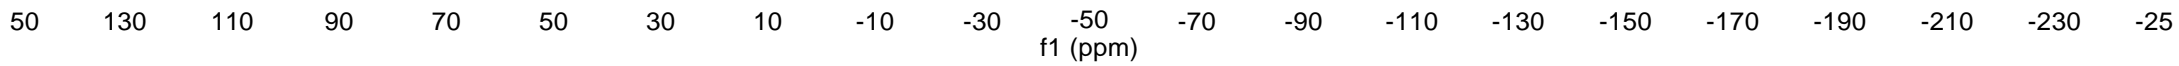

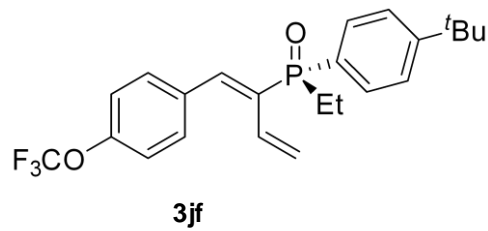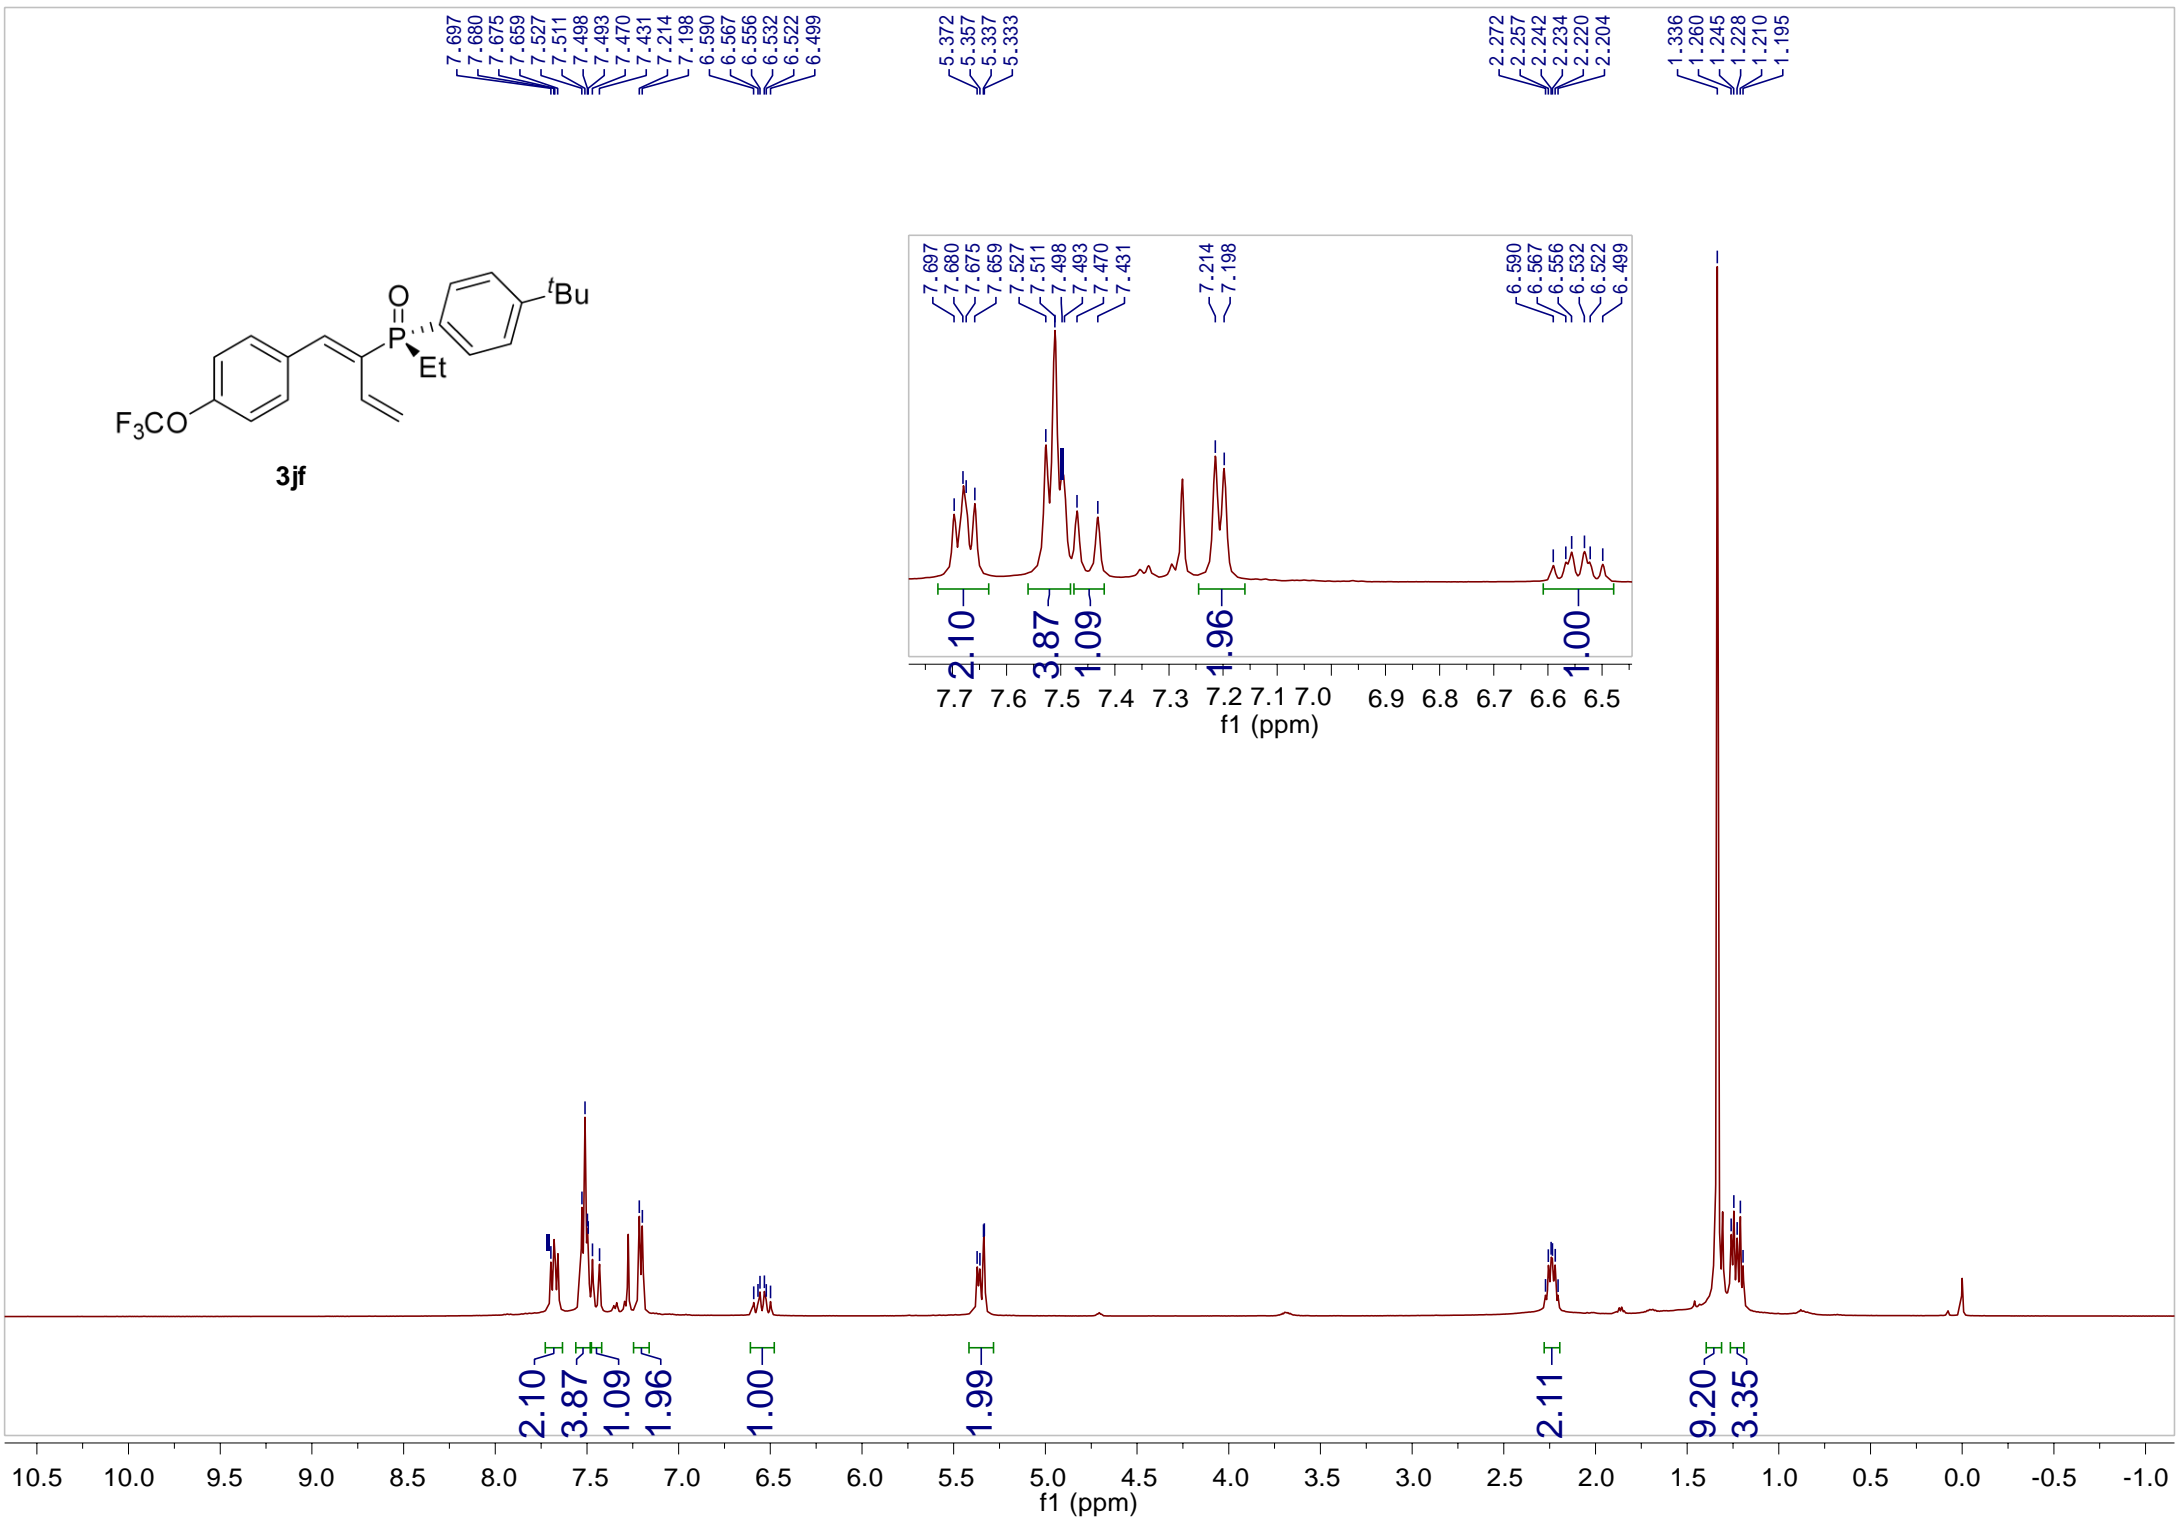

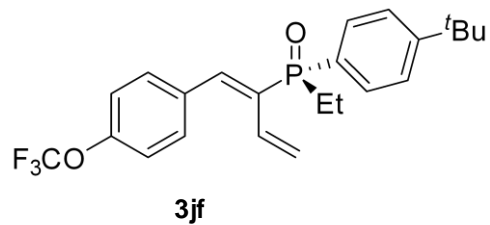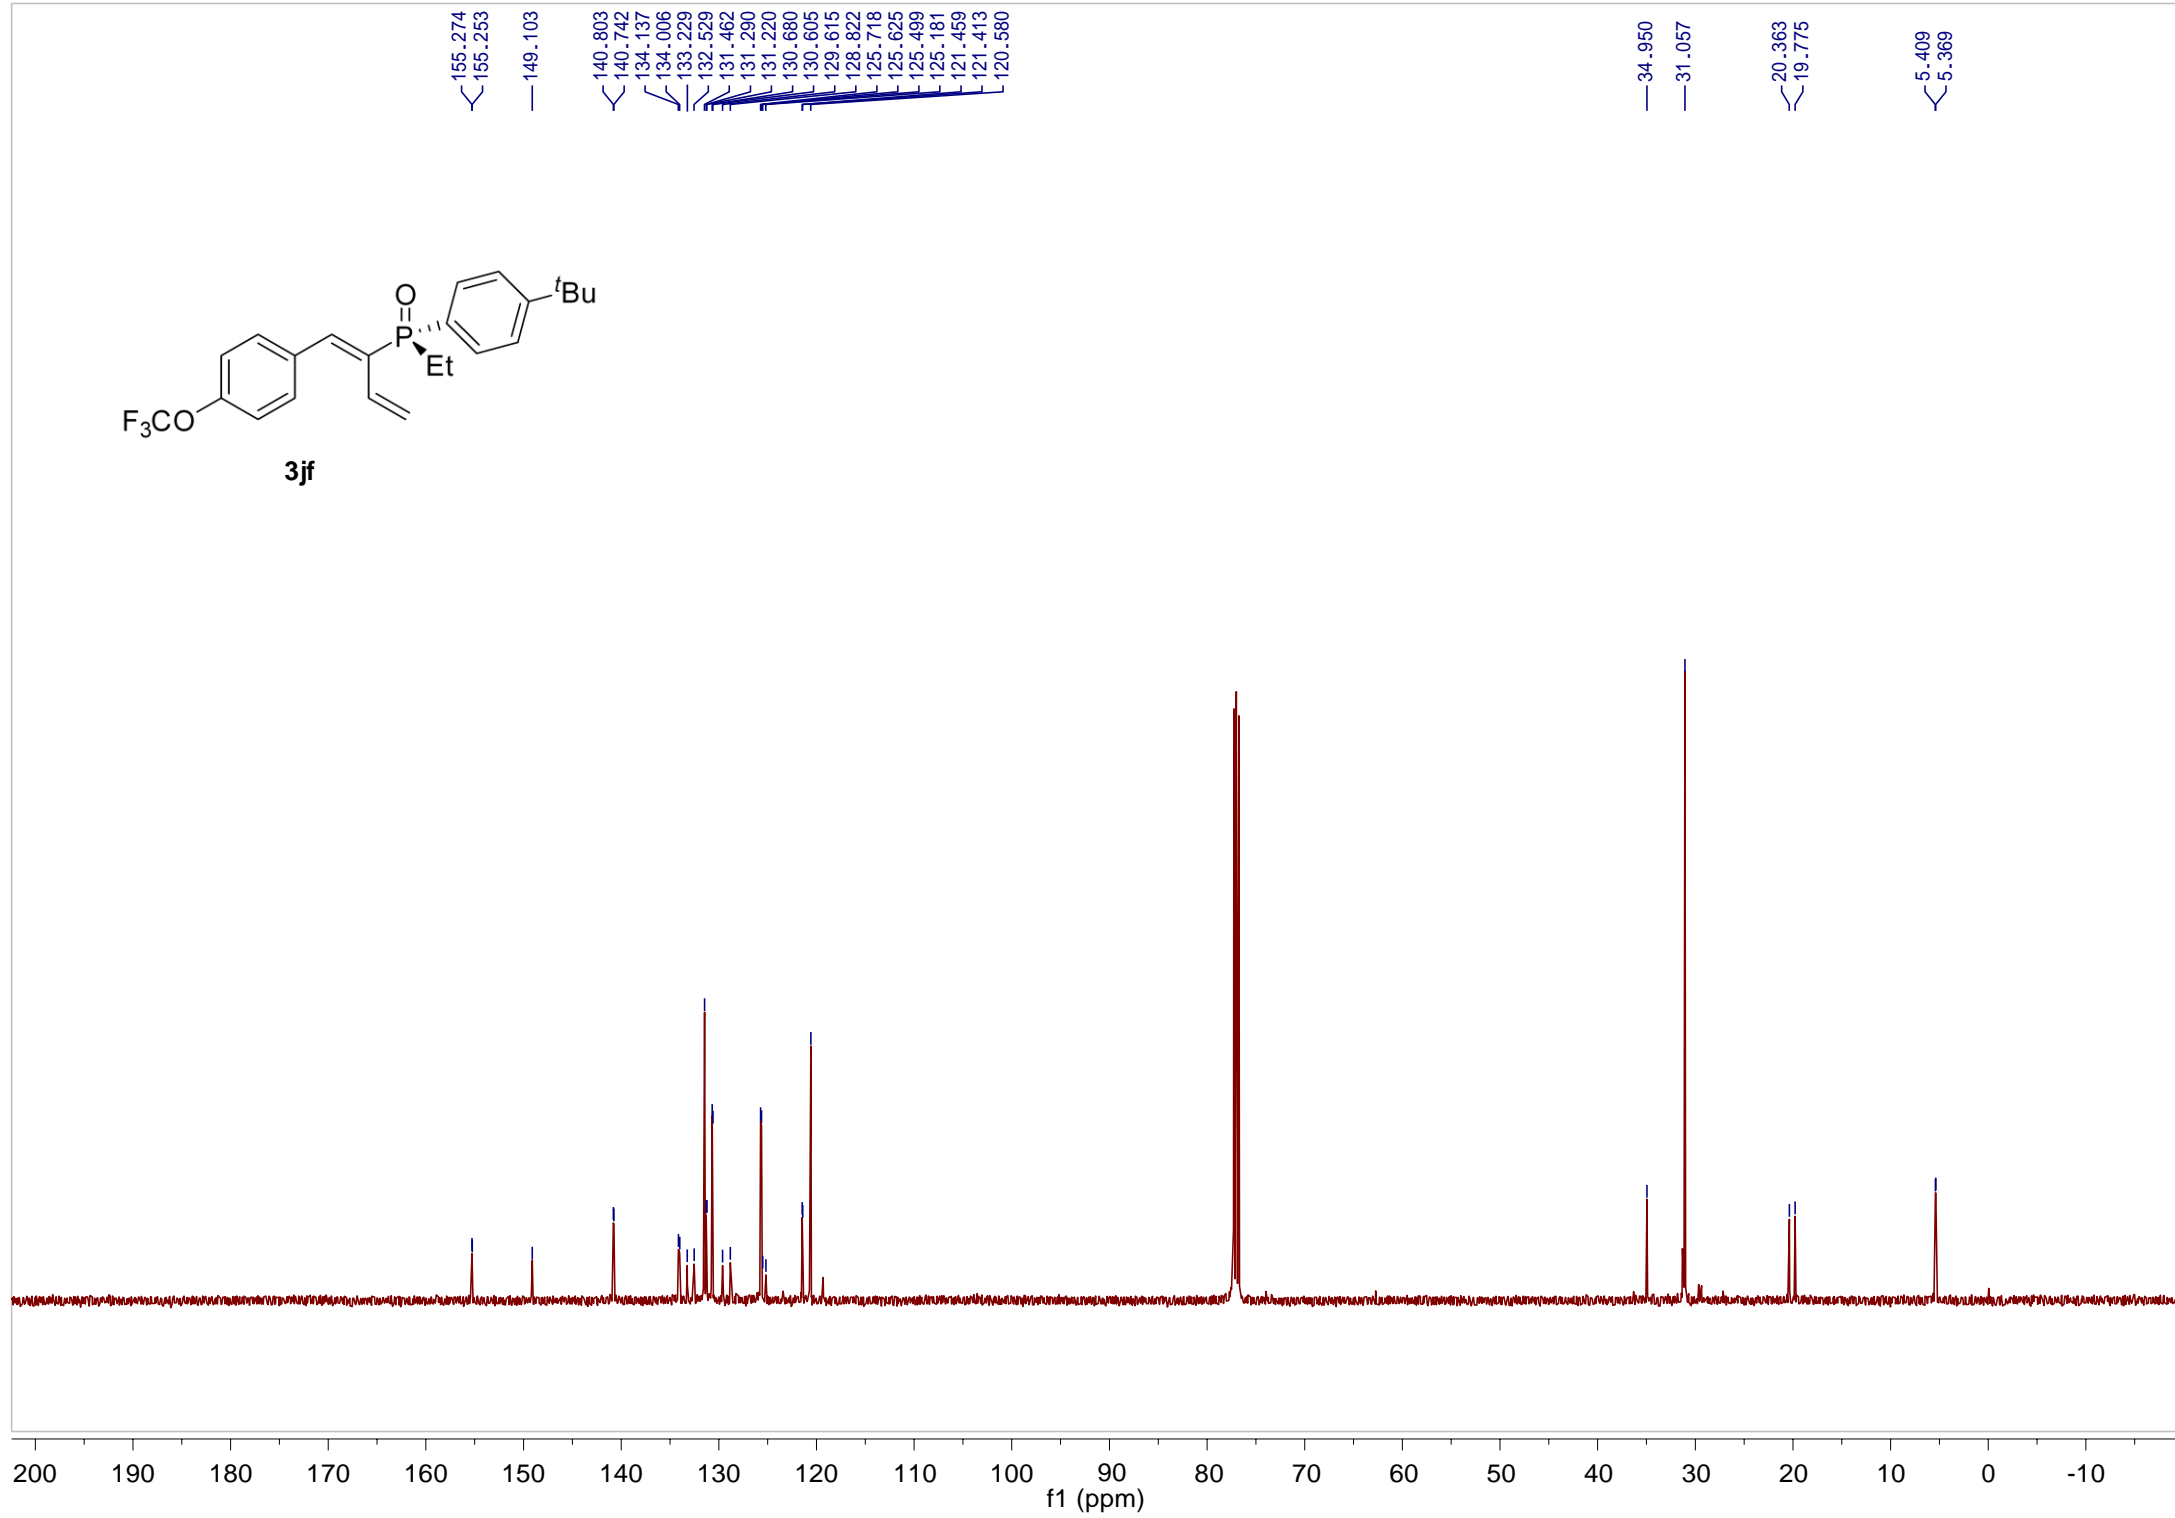

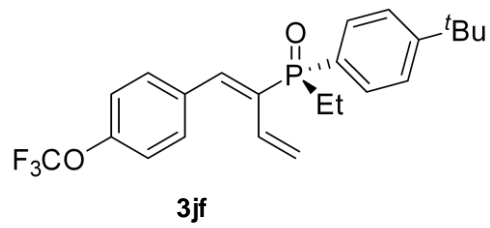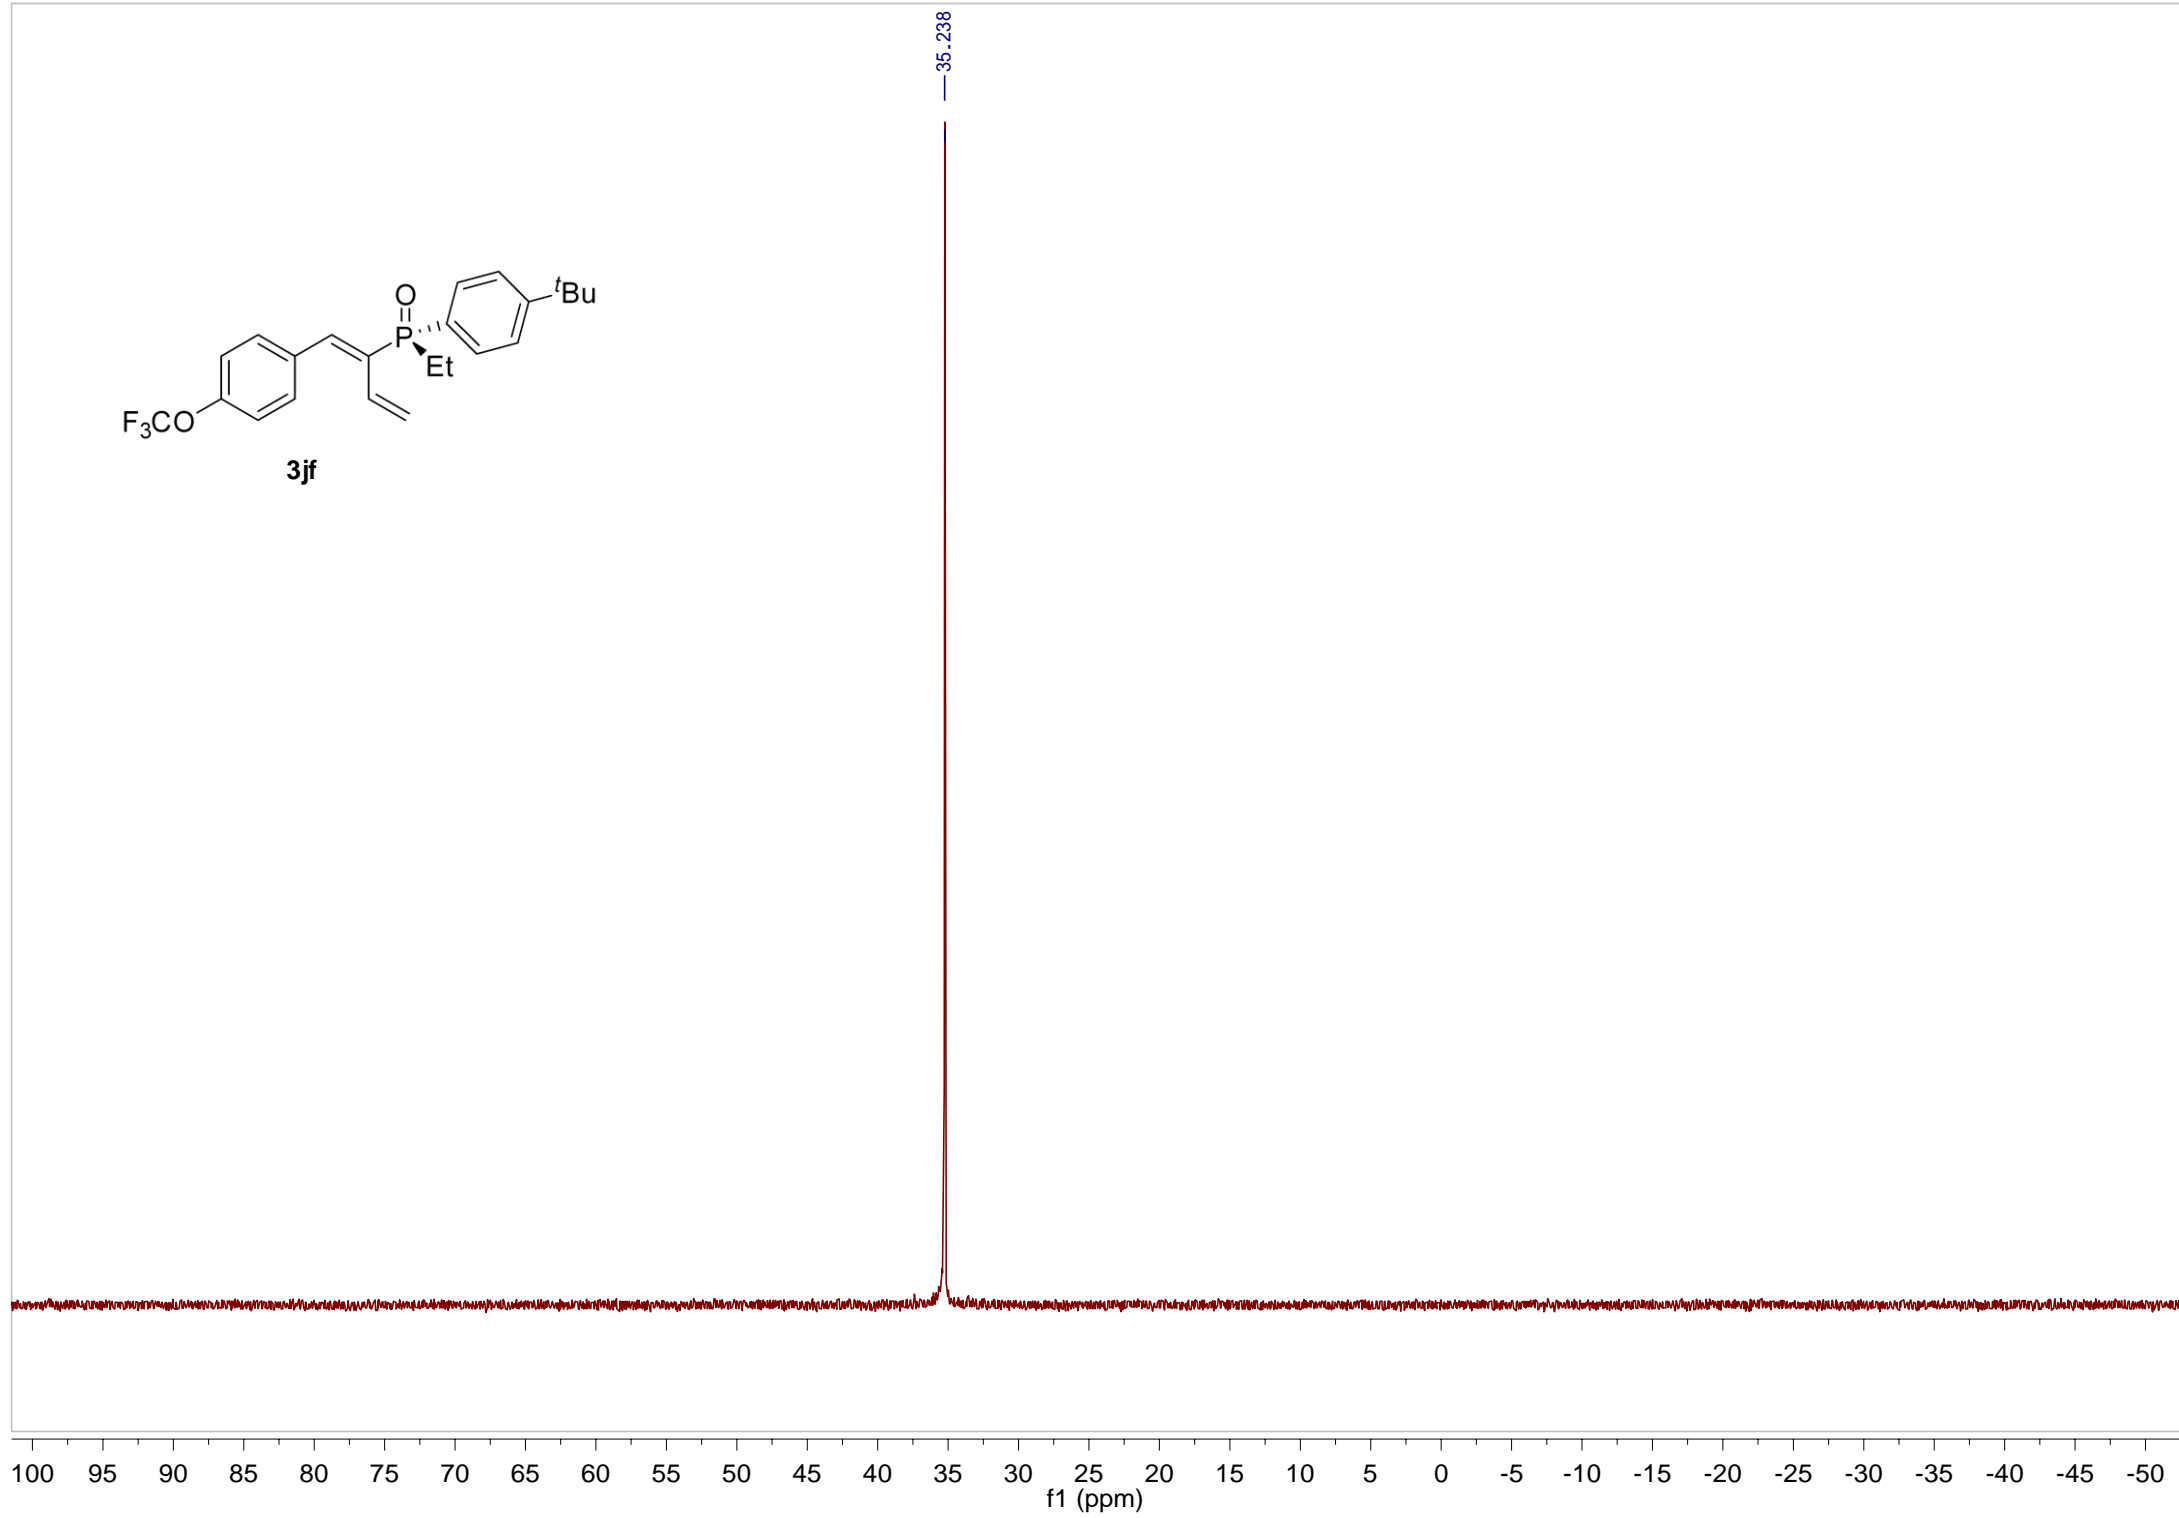

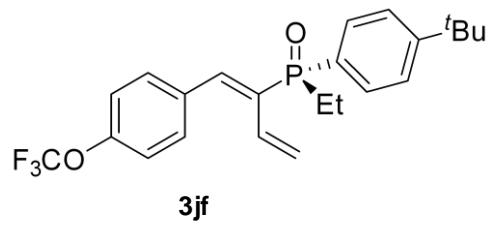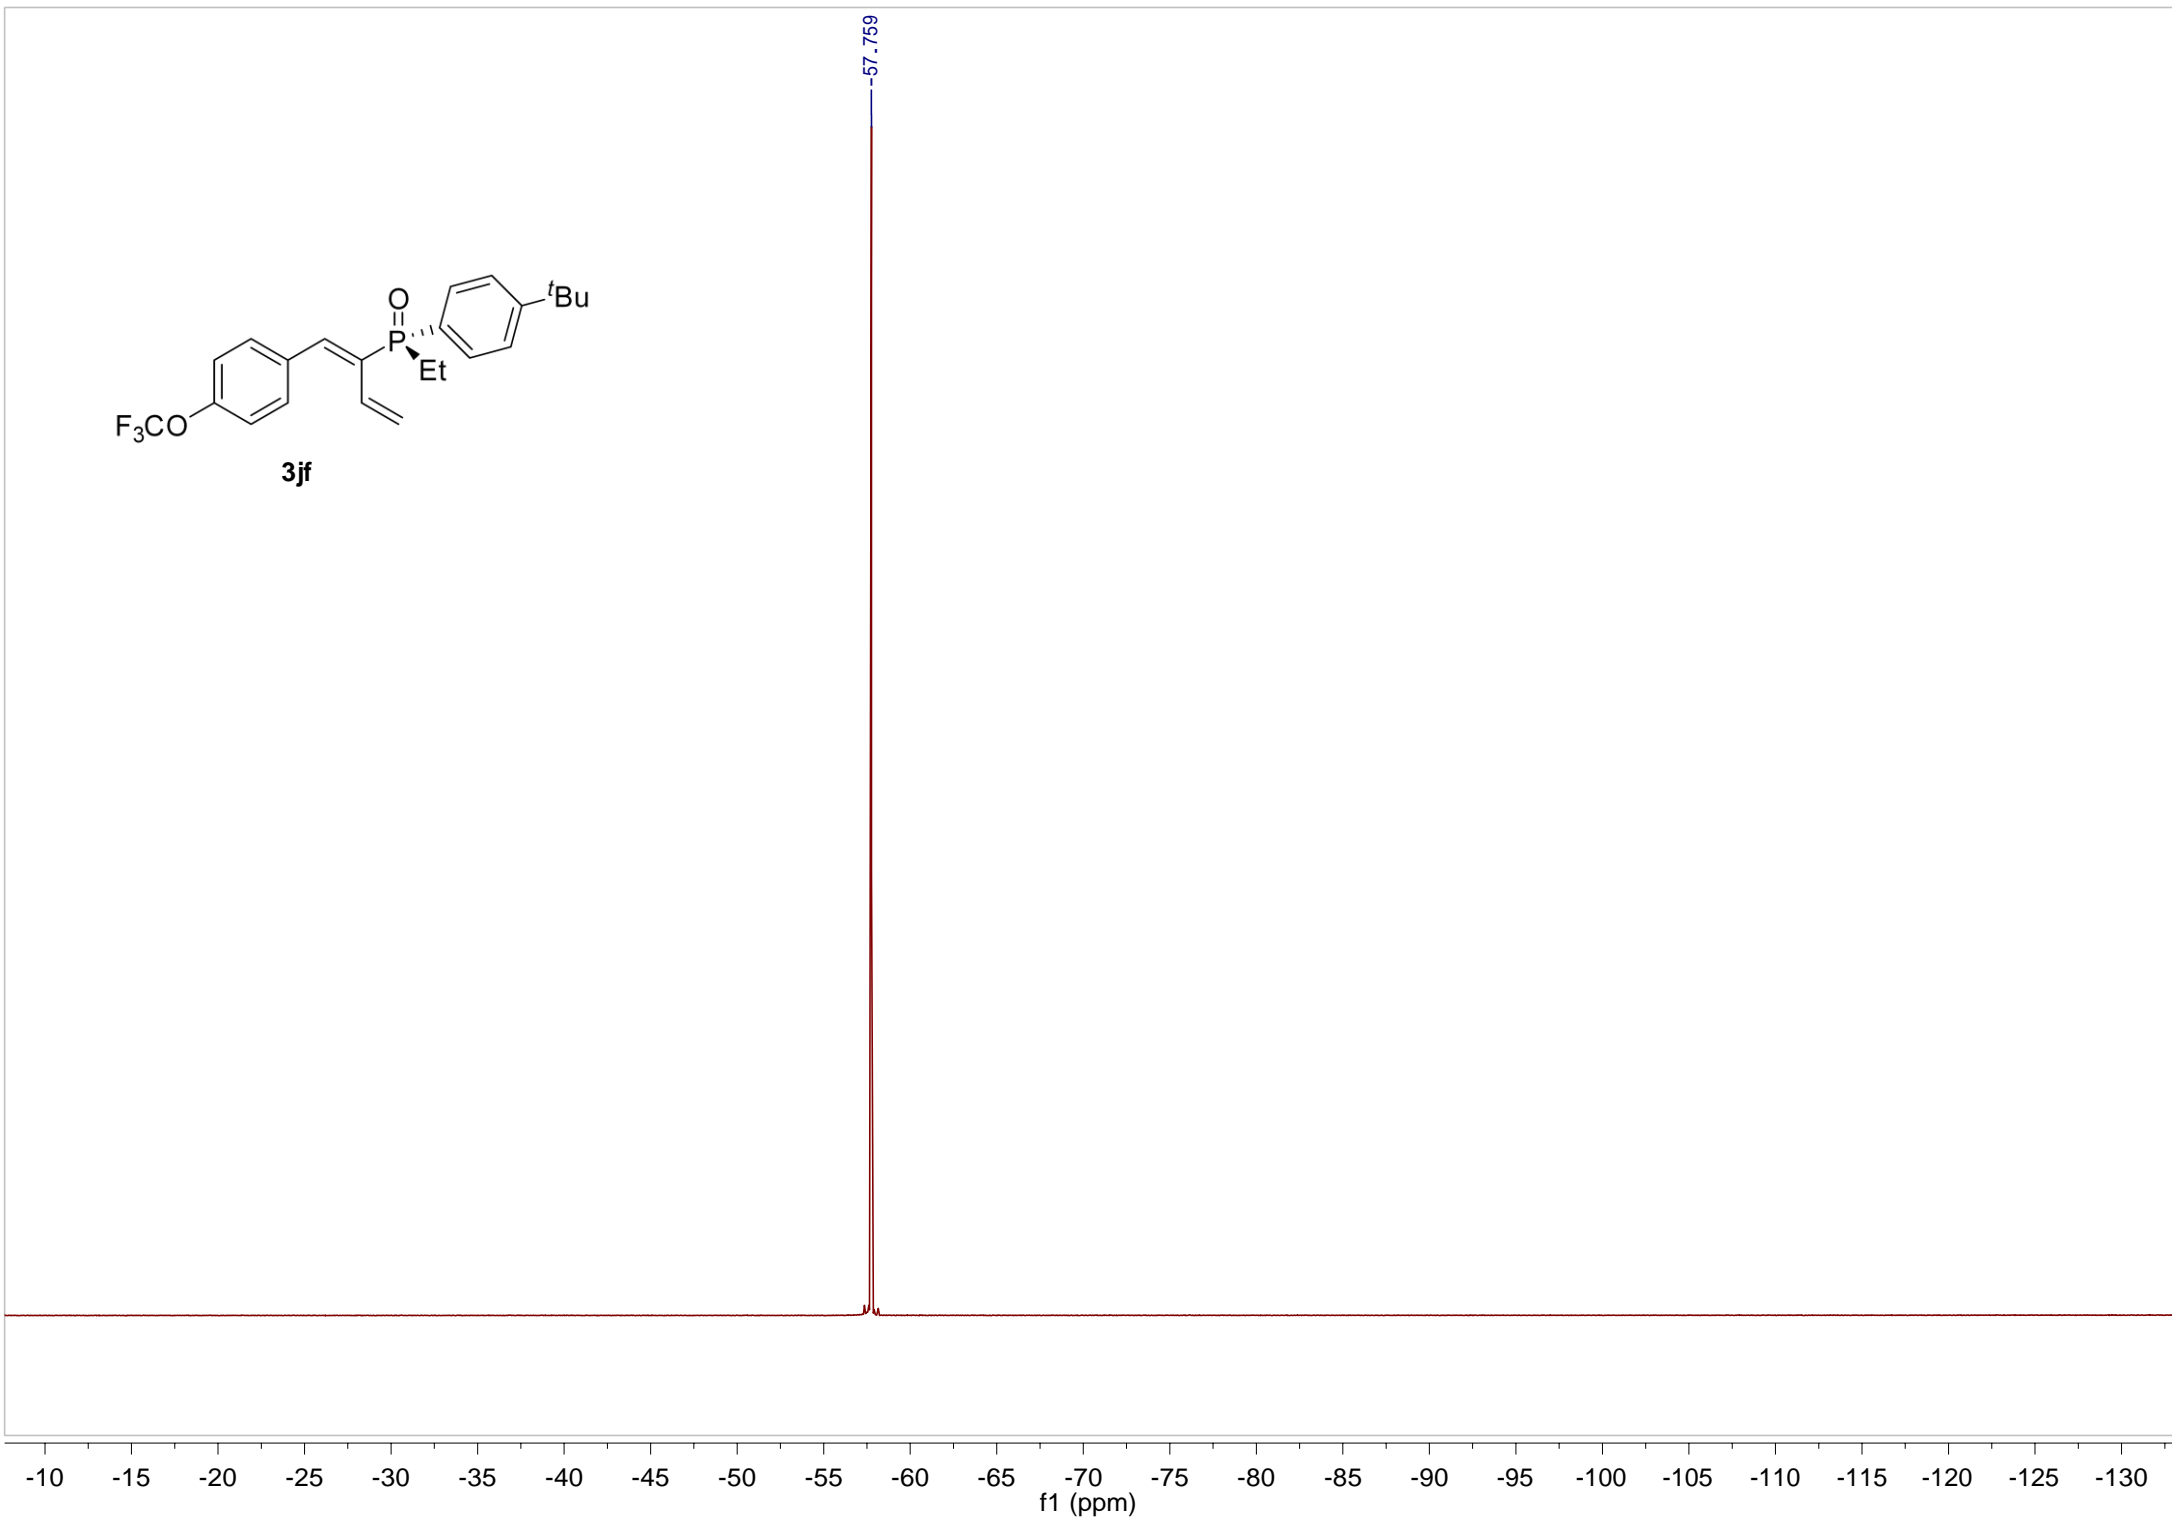

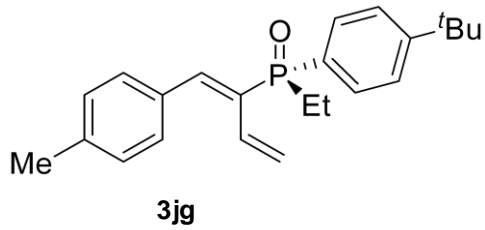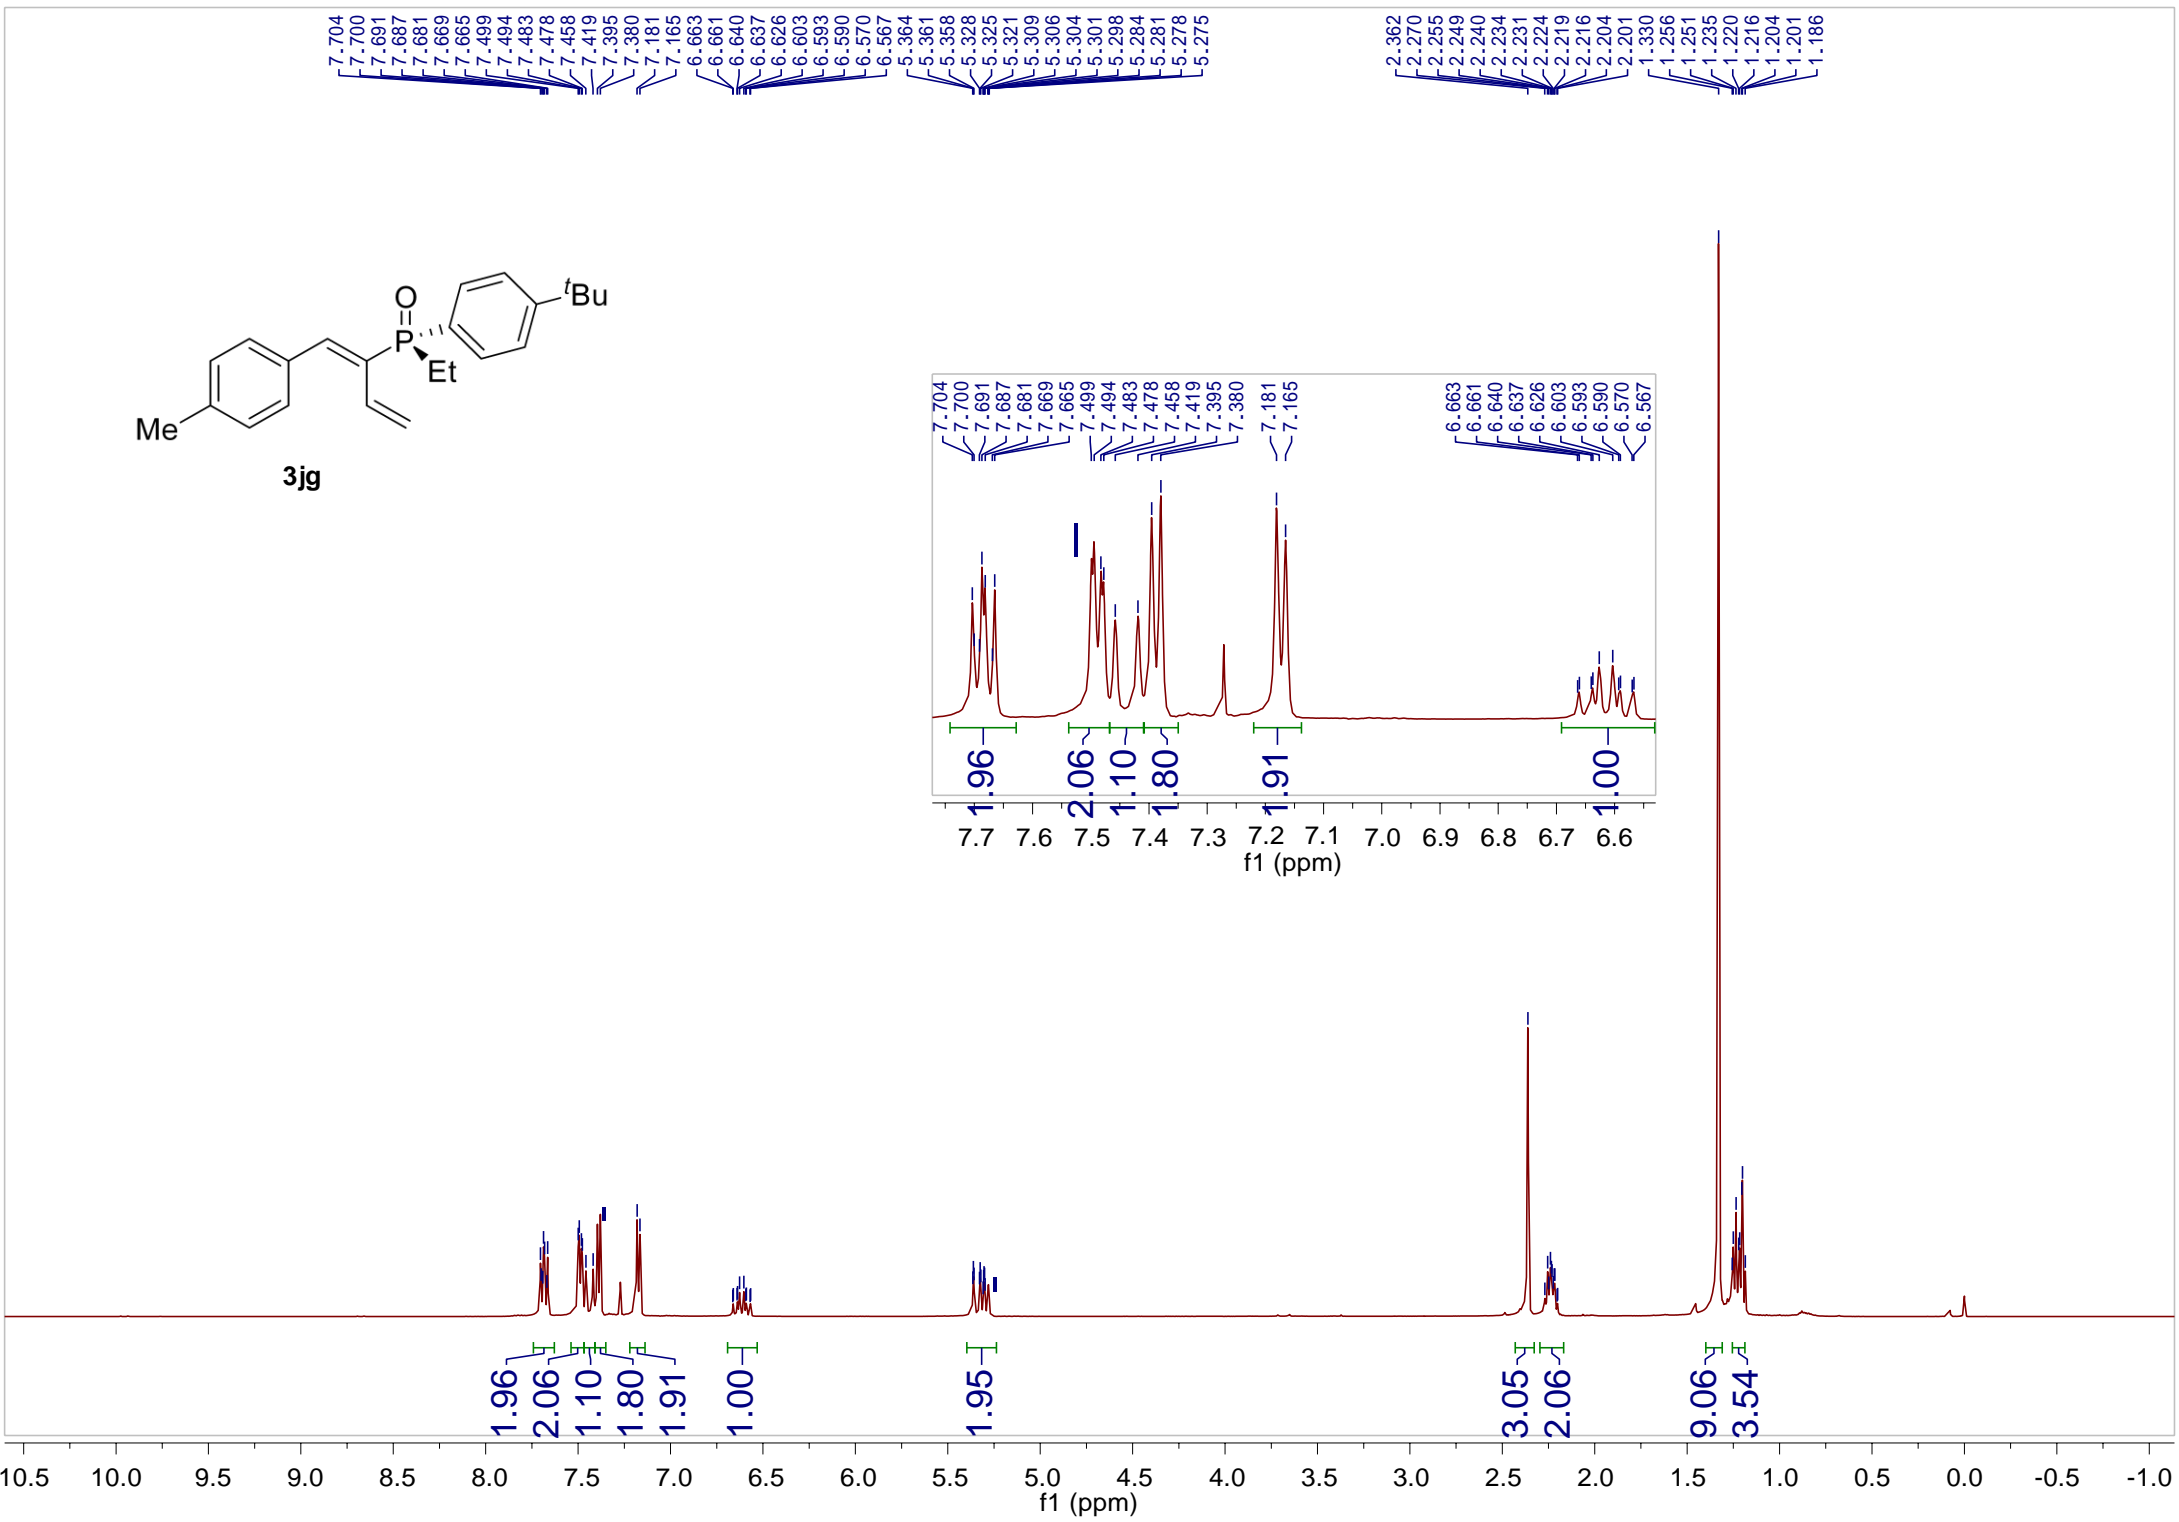

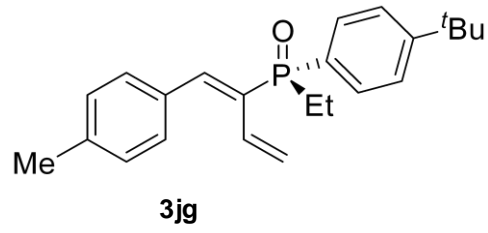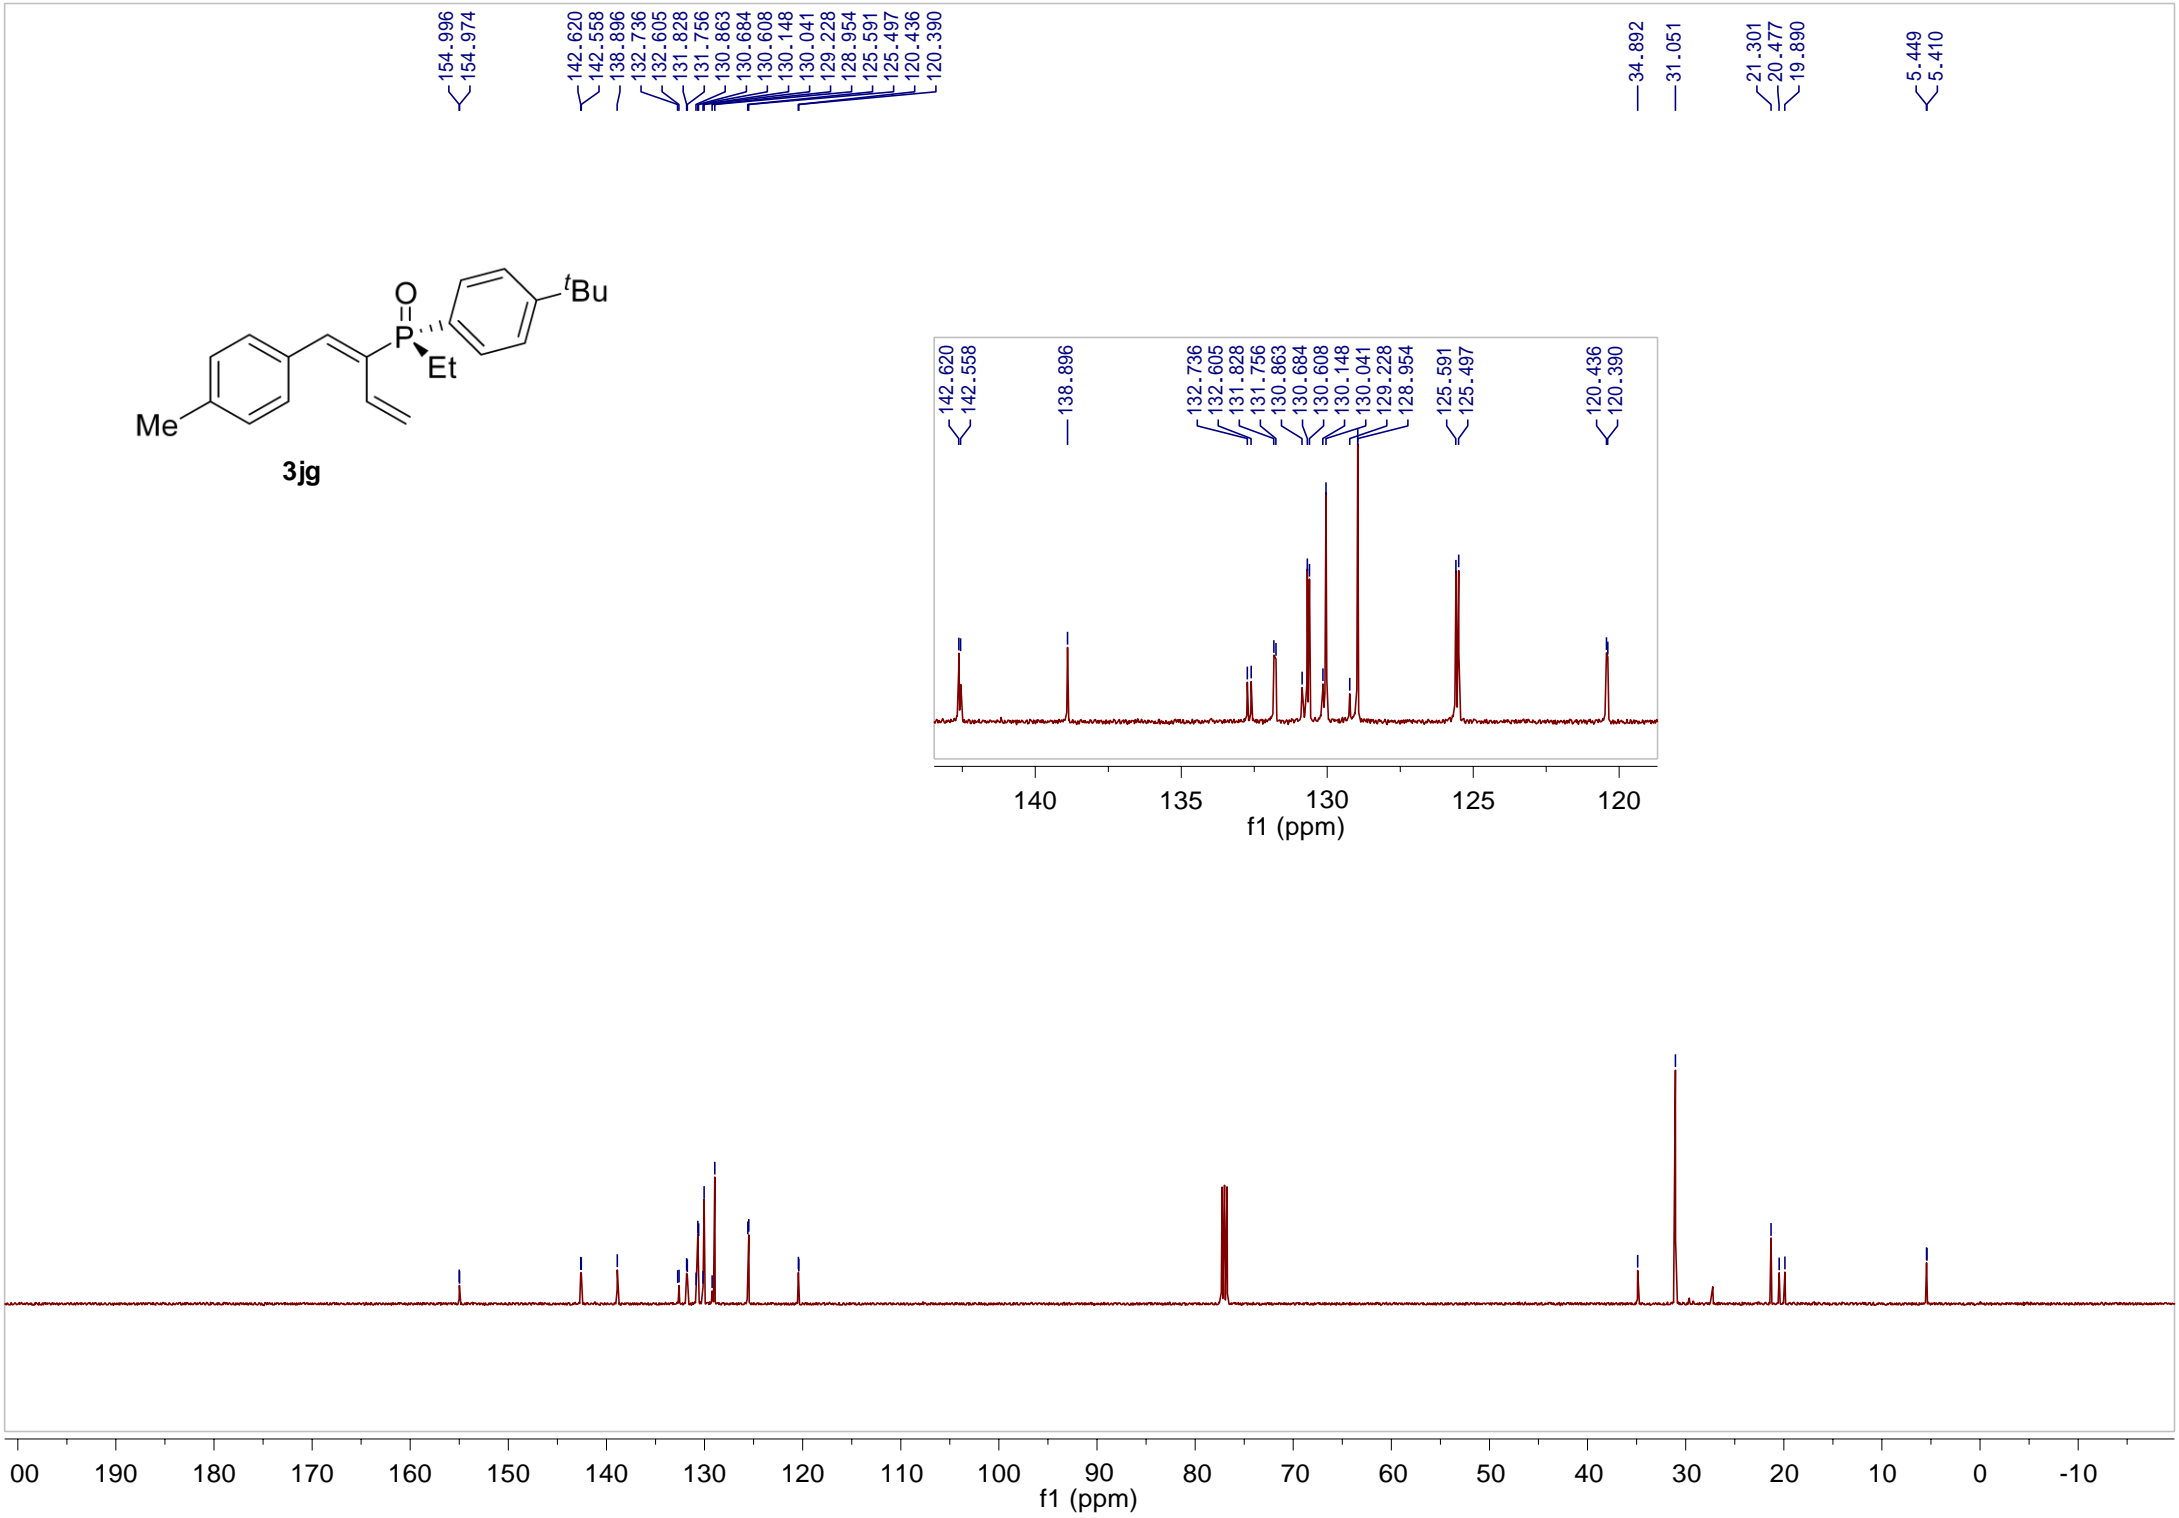



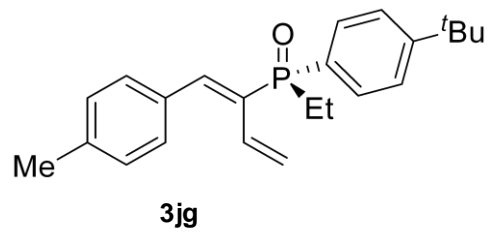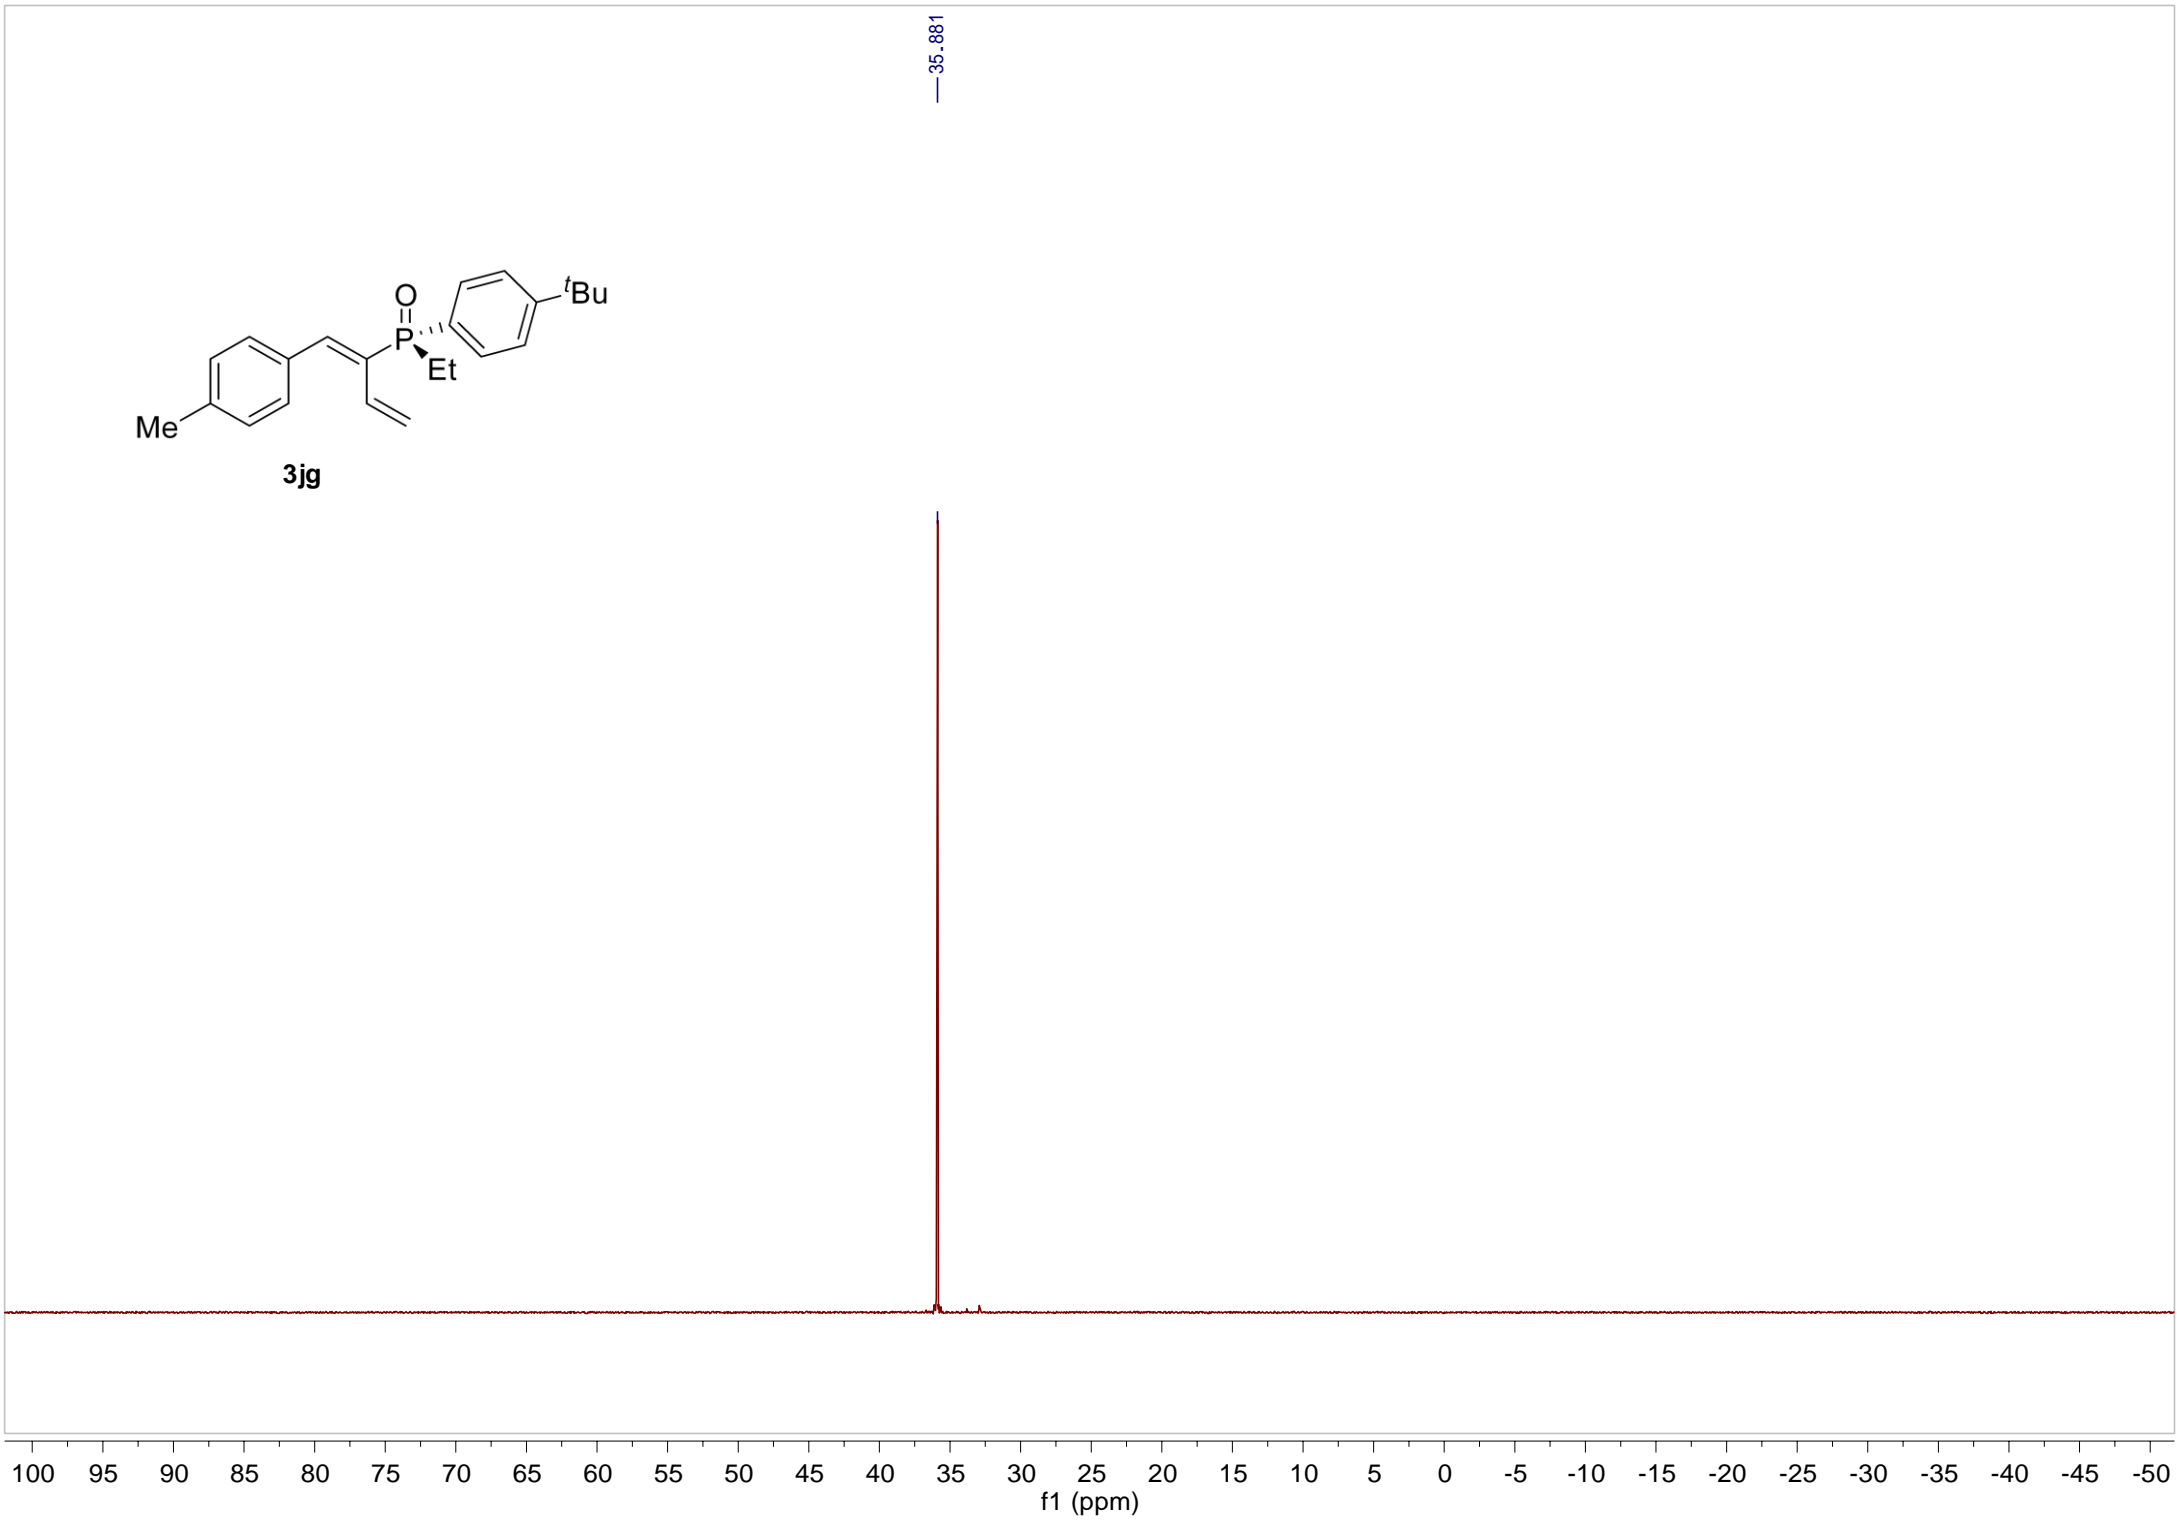

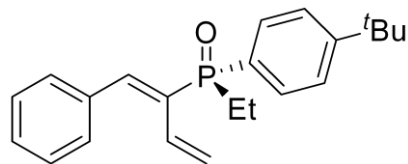

**3jh**

7.710  
7.696  
7.693  
7.687  
7.674  
7.671  
7.671  
7.507  
7.502  
7.490  
7.486  
7.473  
7.452  
7.383  
7.379  
7.366  
7.353  
7.350  
7.332  
7.321  
7.317  
7.303  
6.660  
6.637  
6.624  
6.601  
6.590  
6.587  
6.566

5.388  
5.385  
5.382  
5.352  
5.349  
5.346  
5.321  
5.316  
5.299  
5.296  
5.293

2.278  
2.262  
2.247  
2.241  
2.237  
2.230  
2.226  
2.222  
2.211  
2.207  
1.333  
1.261  
1.256  
1.246  
1.230  
1.226  
1.214  
1.211  
1.196

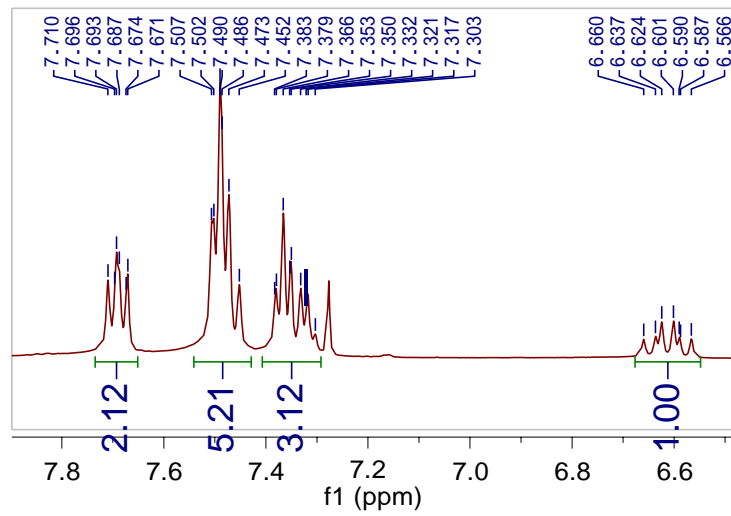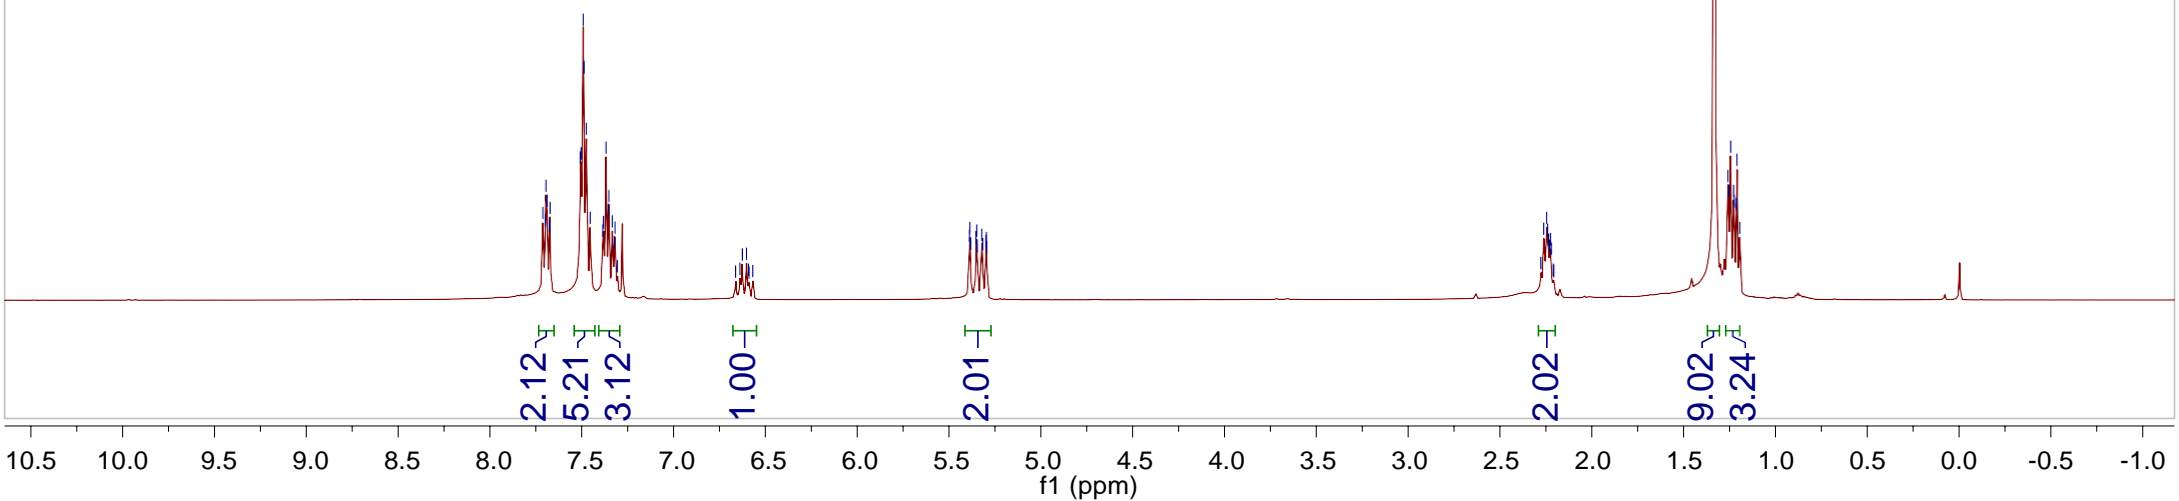

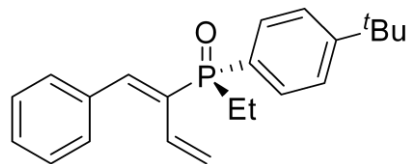

3jh

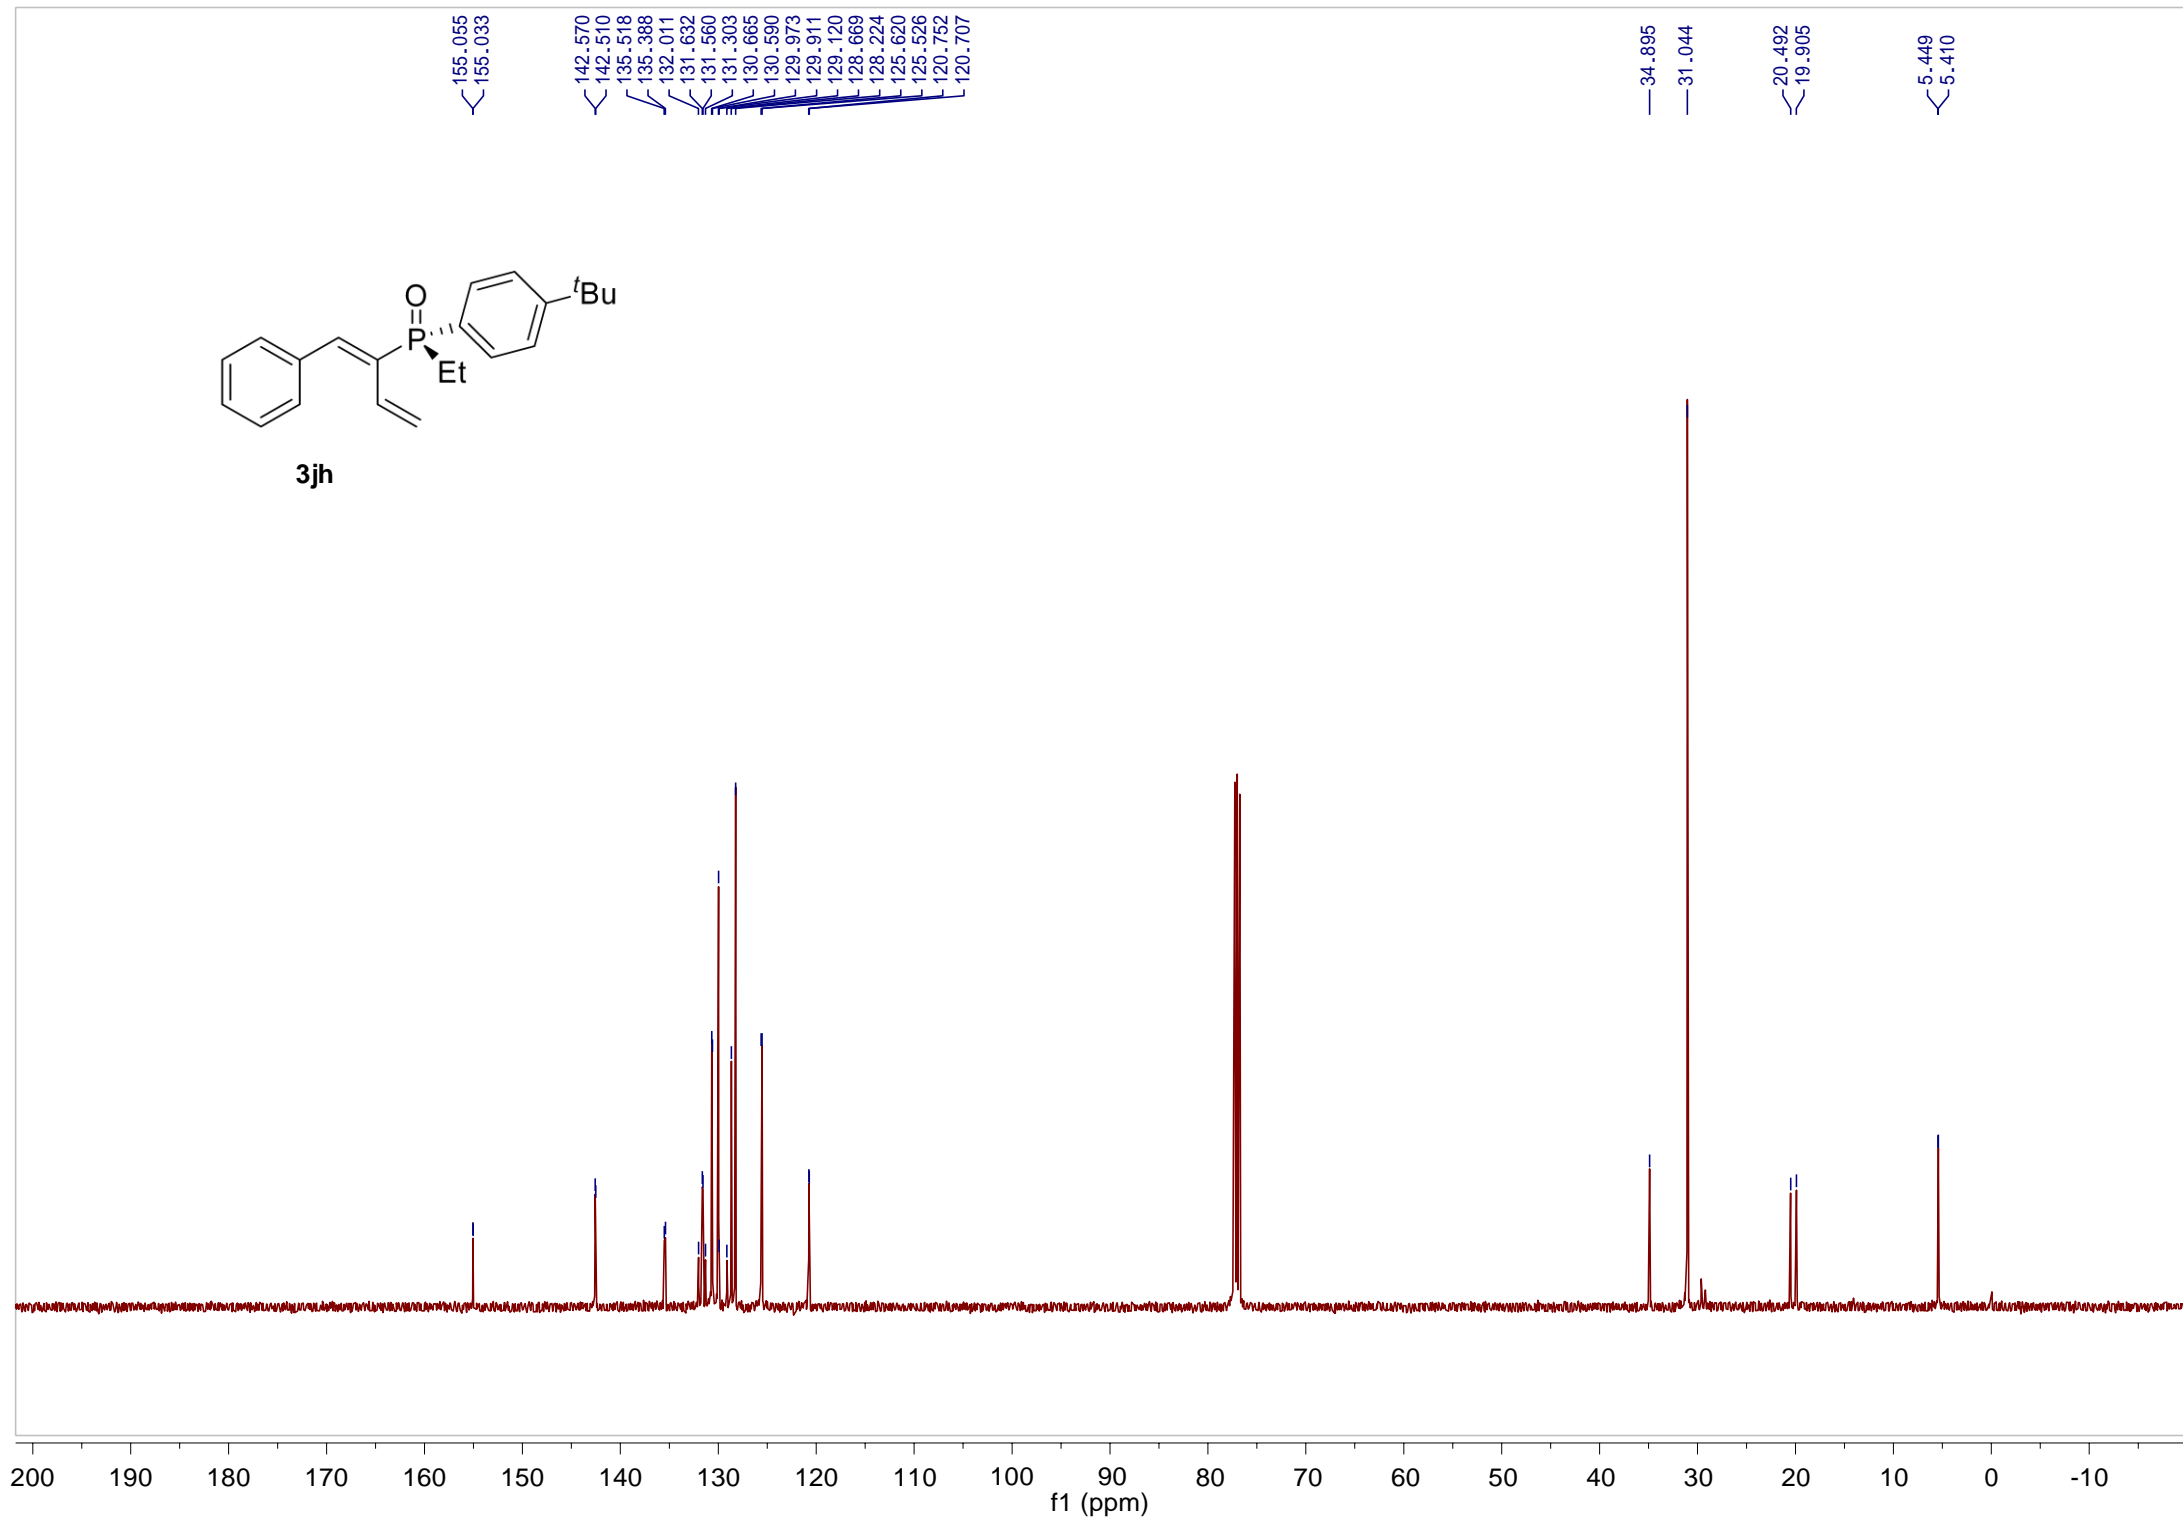

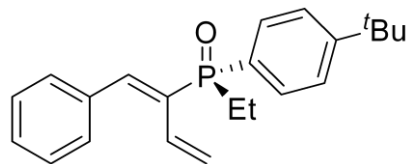

3jh

— 35.629

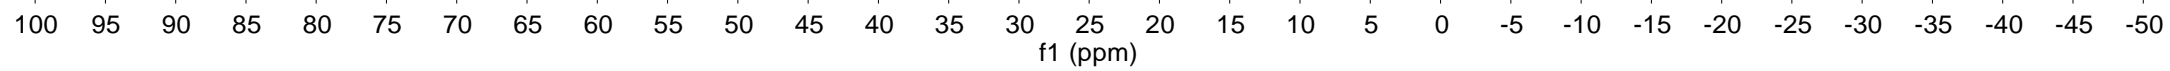

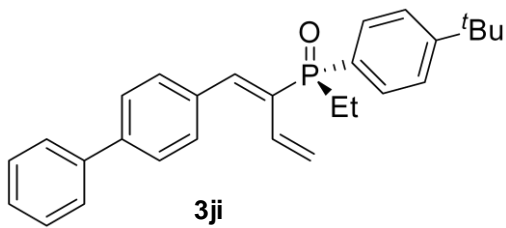

**3ji**

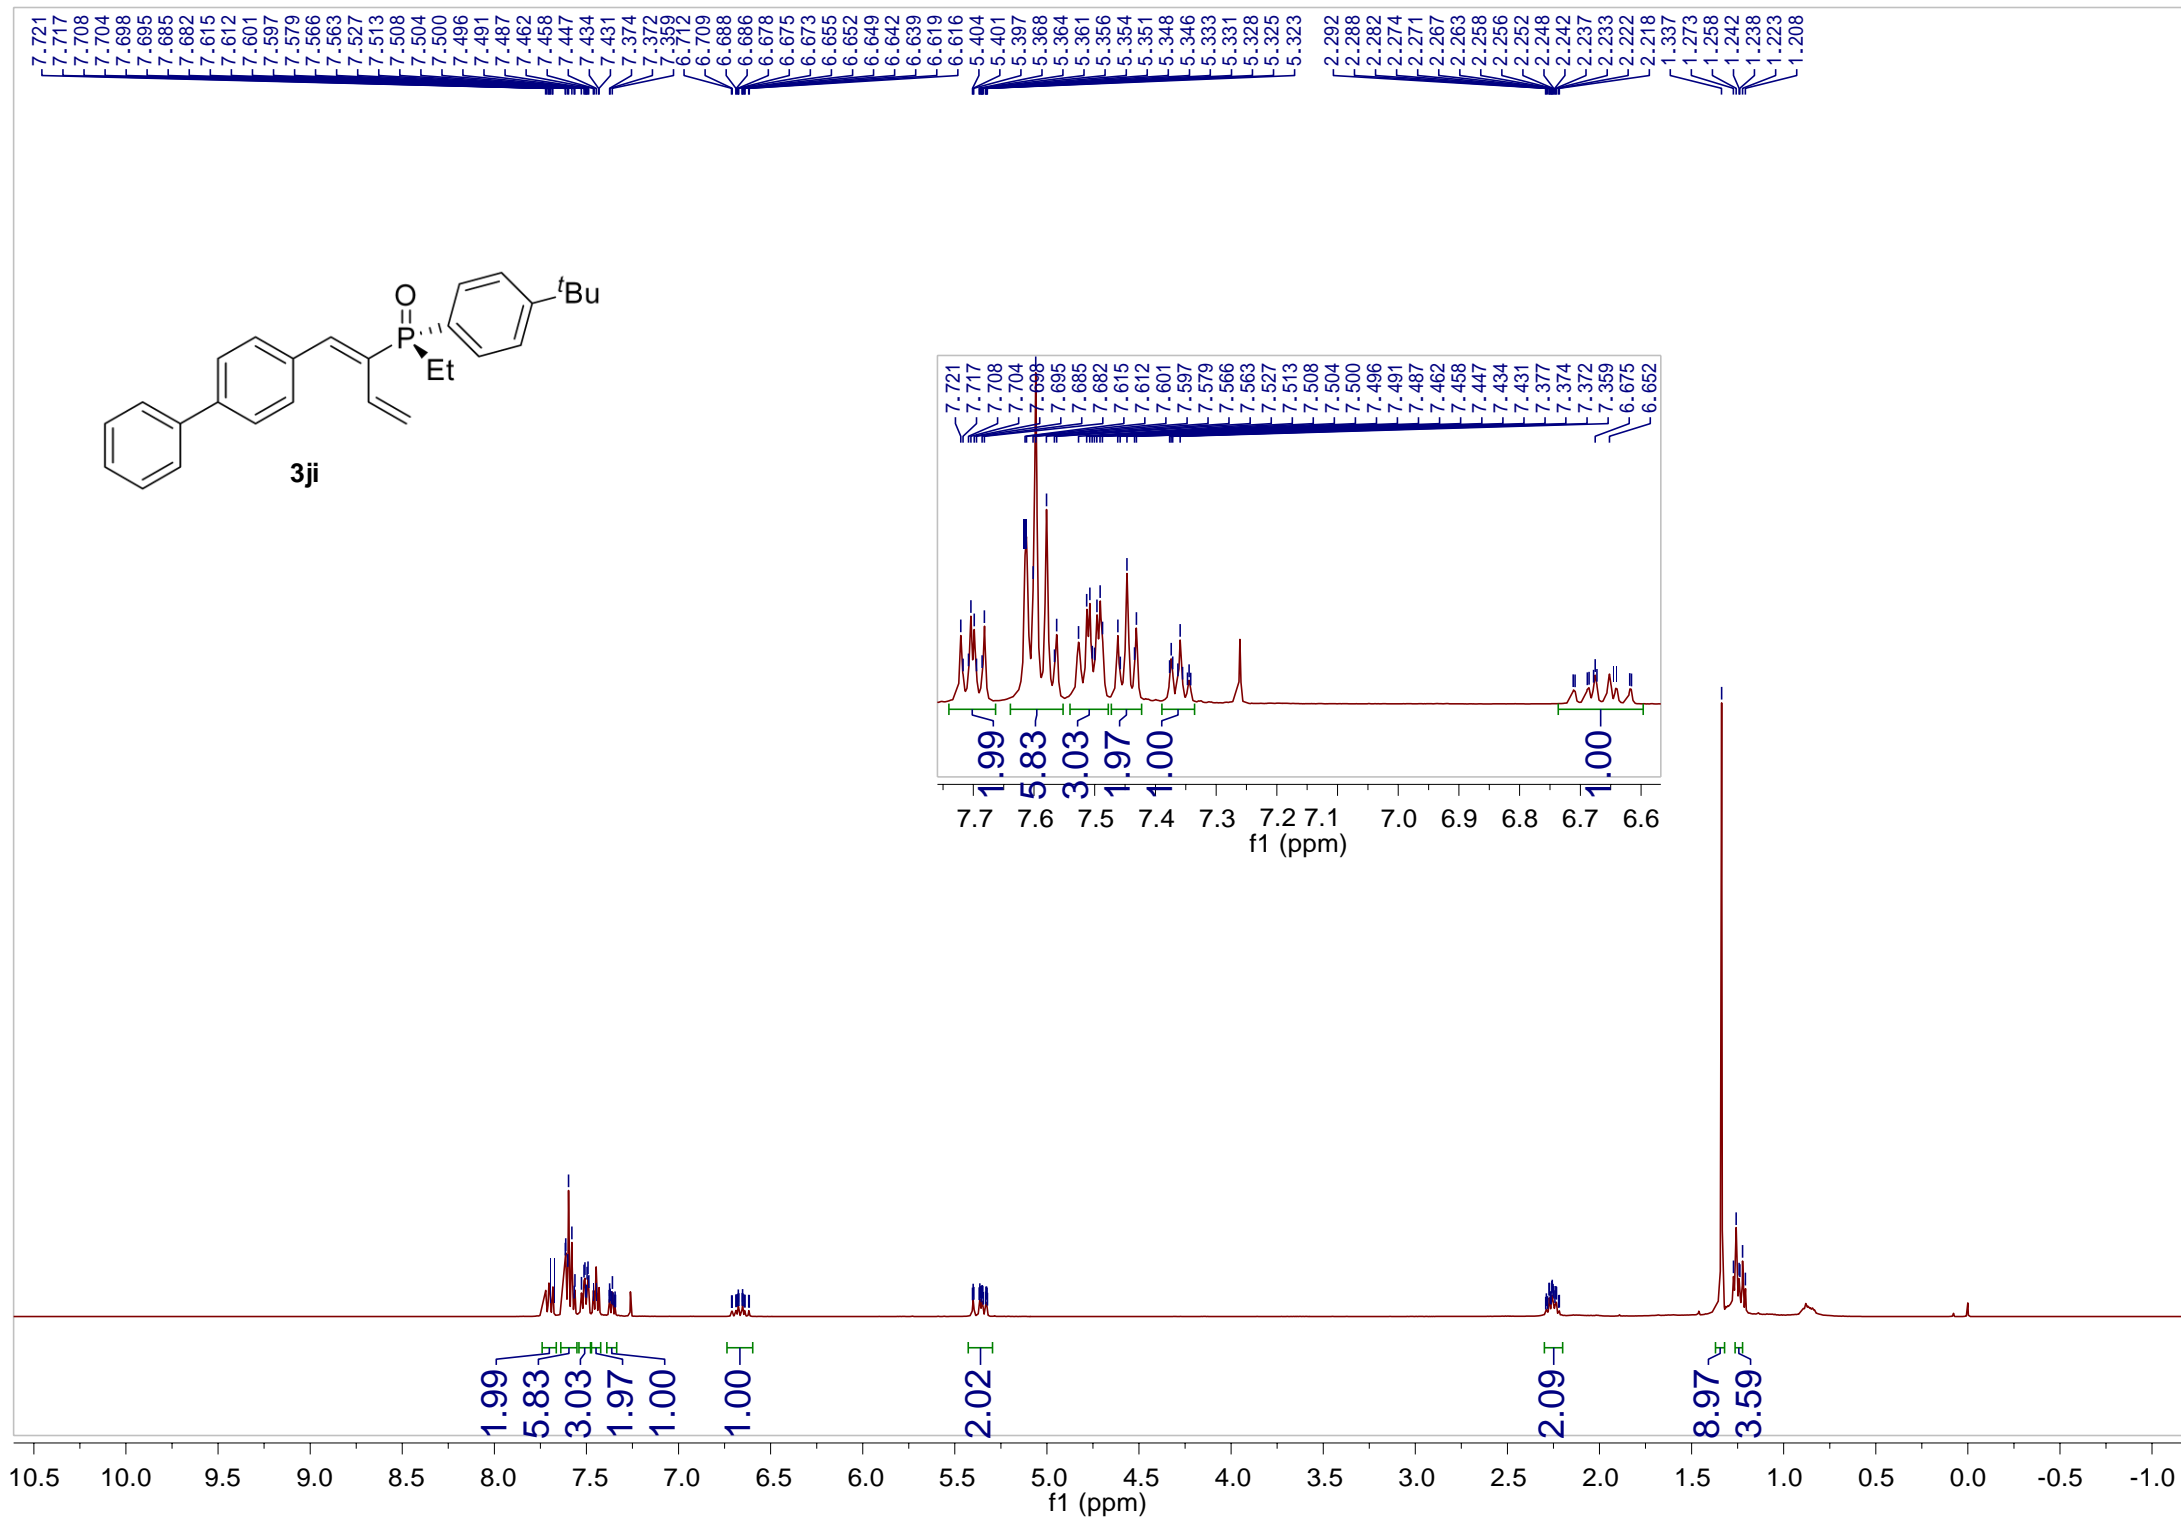

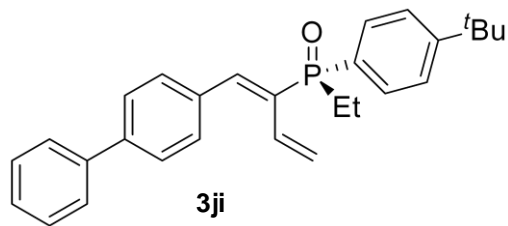

155.094  
155.072  
142.071  
142.010  
141.427  
140.231  
134.531  
134.400  
132.035  
131.788  
131.717  
131.327  
130.706  
130.630  
130.564  
129.996  
129.206  
128.809  
127.616  
126.978  
126.894  
125.656  
125.563  
120.831  
120.785

34.929  
31.073

20.490  
19.903

5.480  
5.441

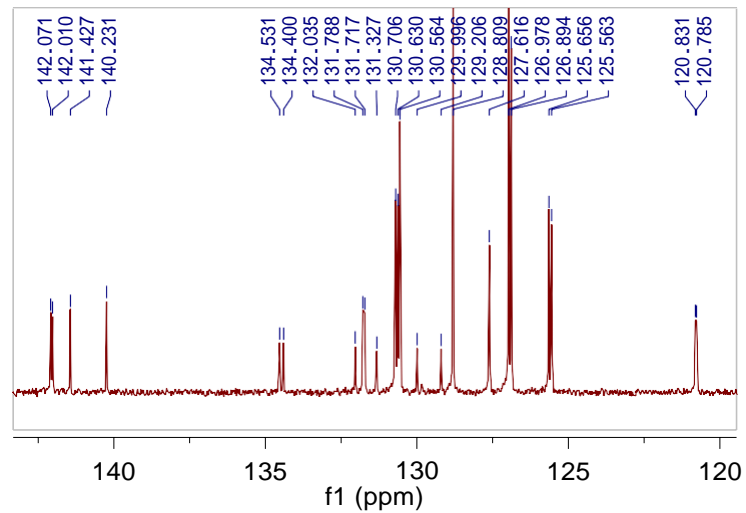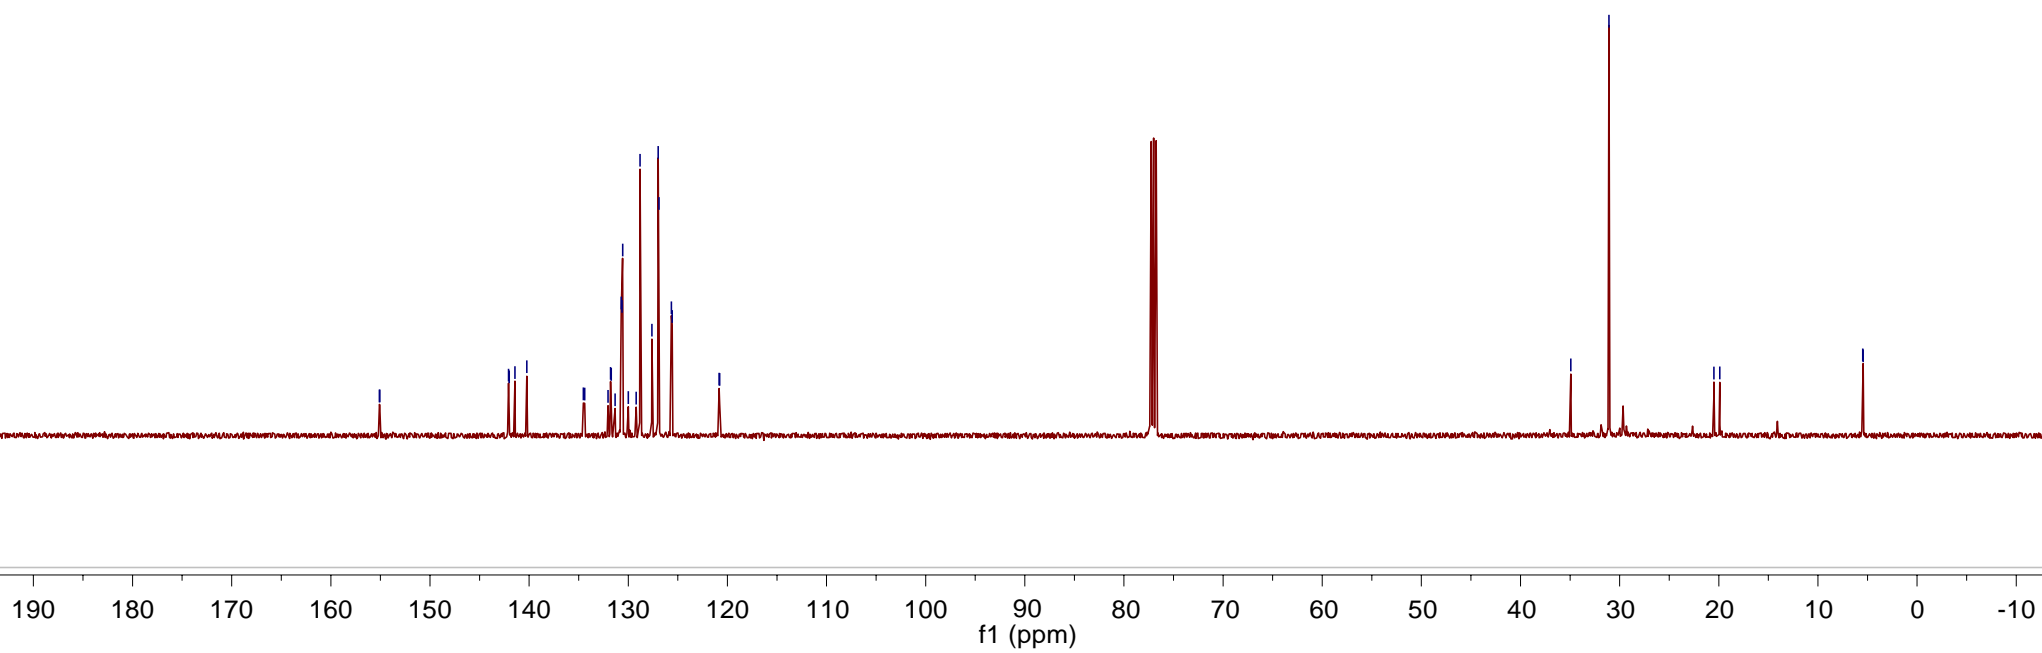

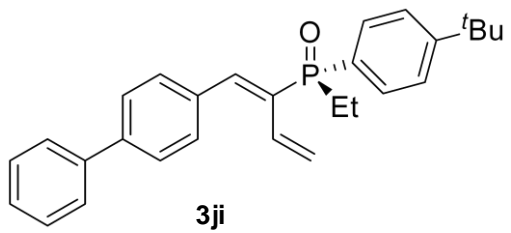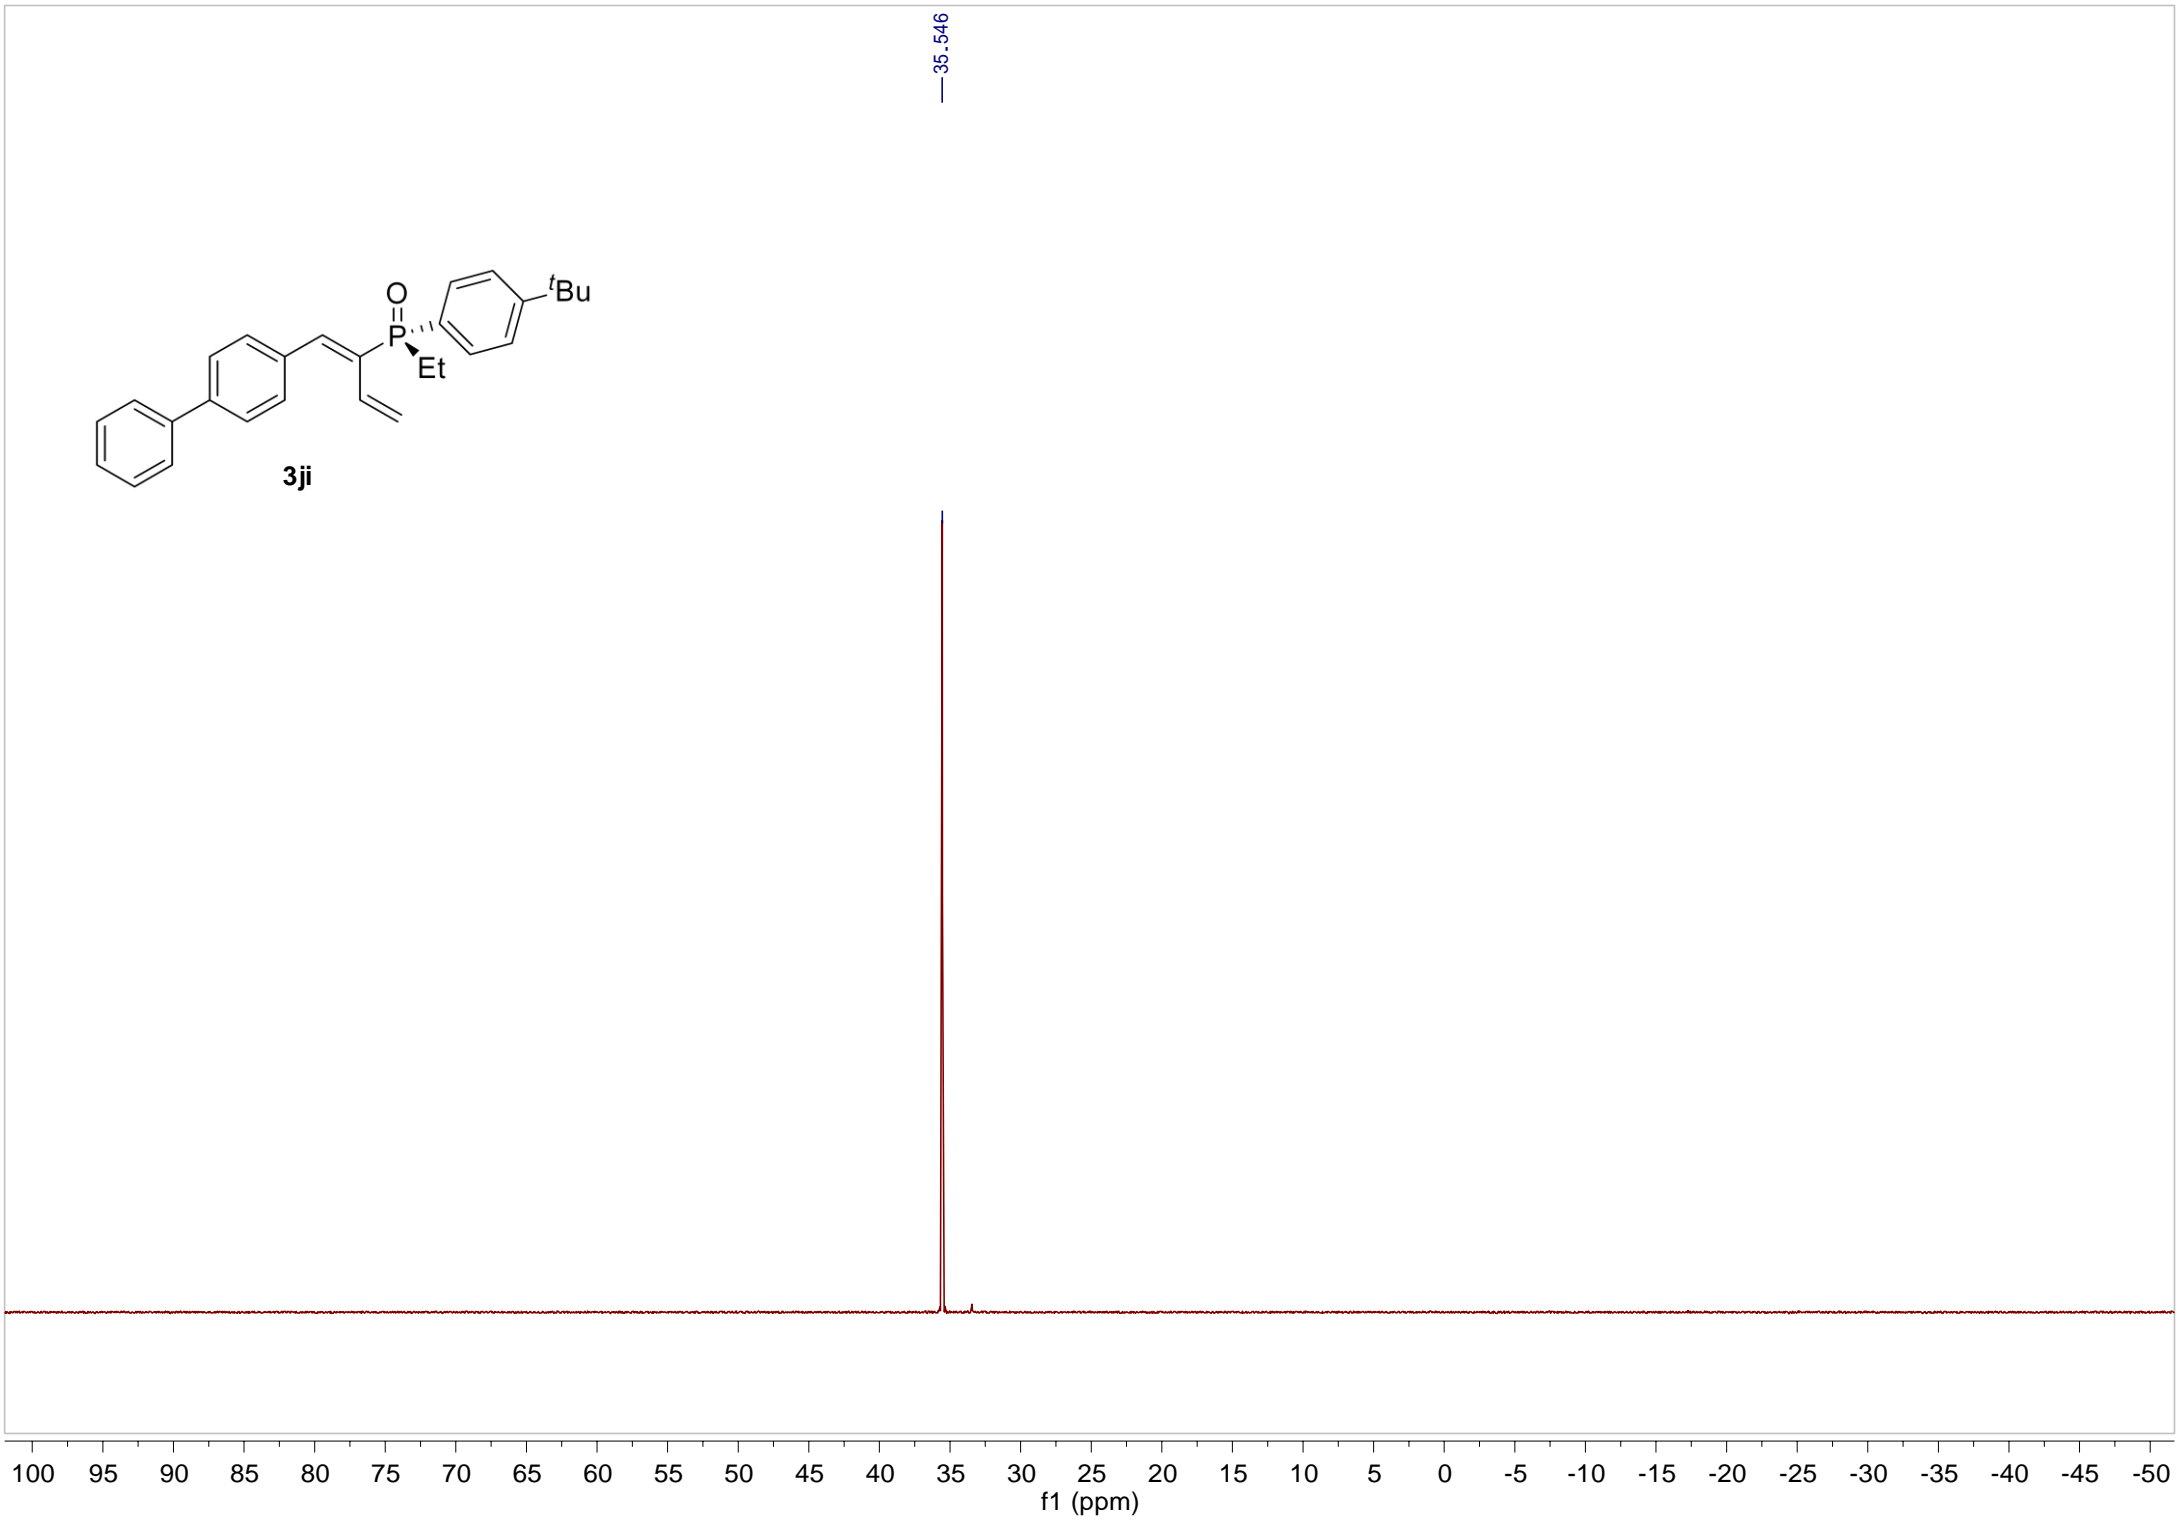

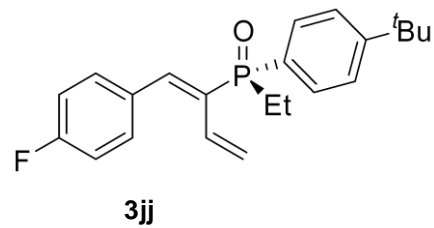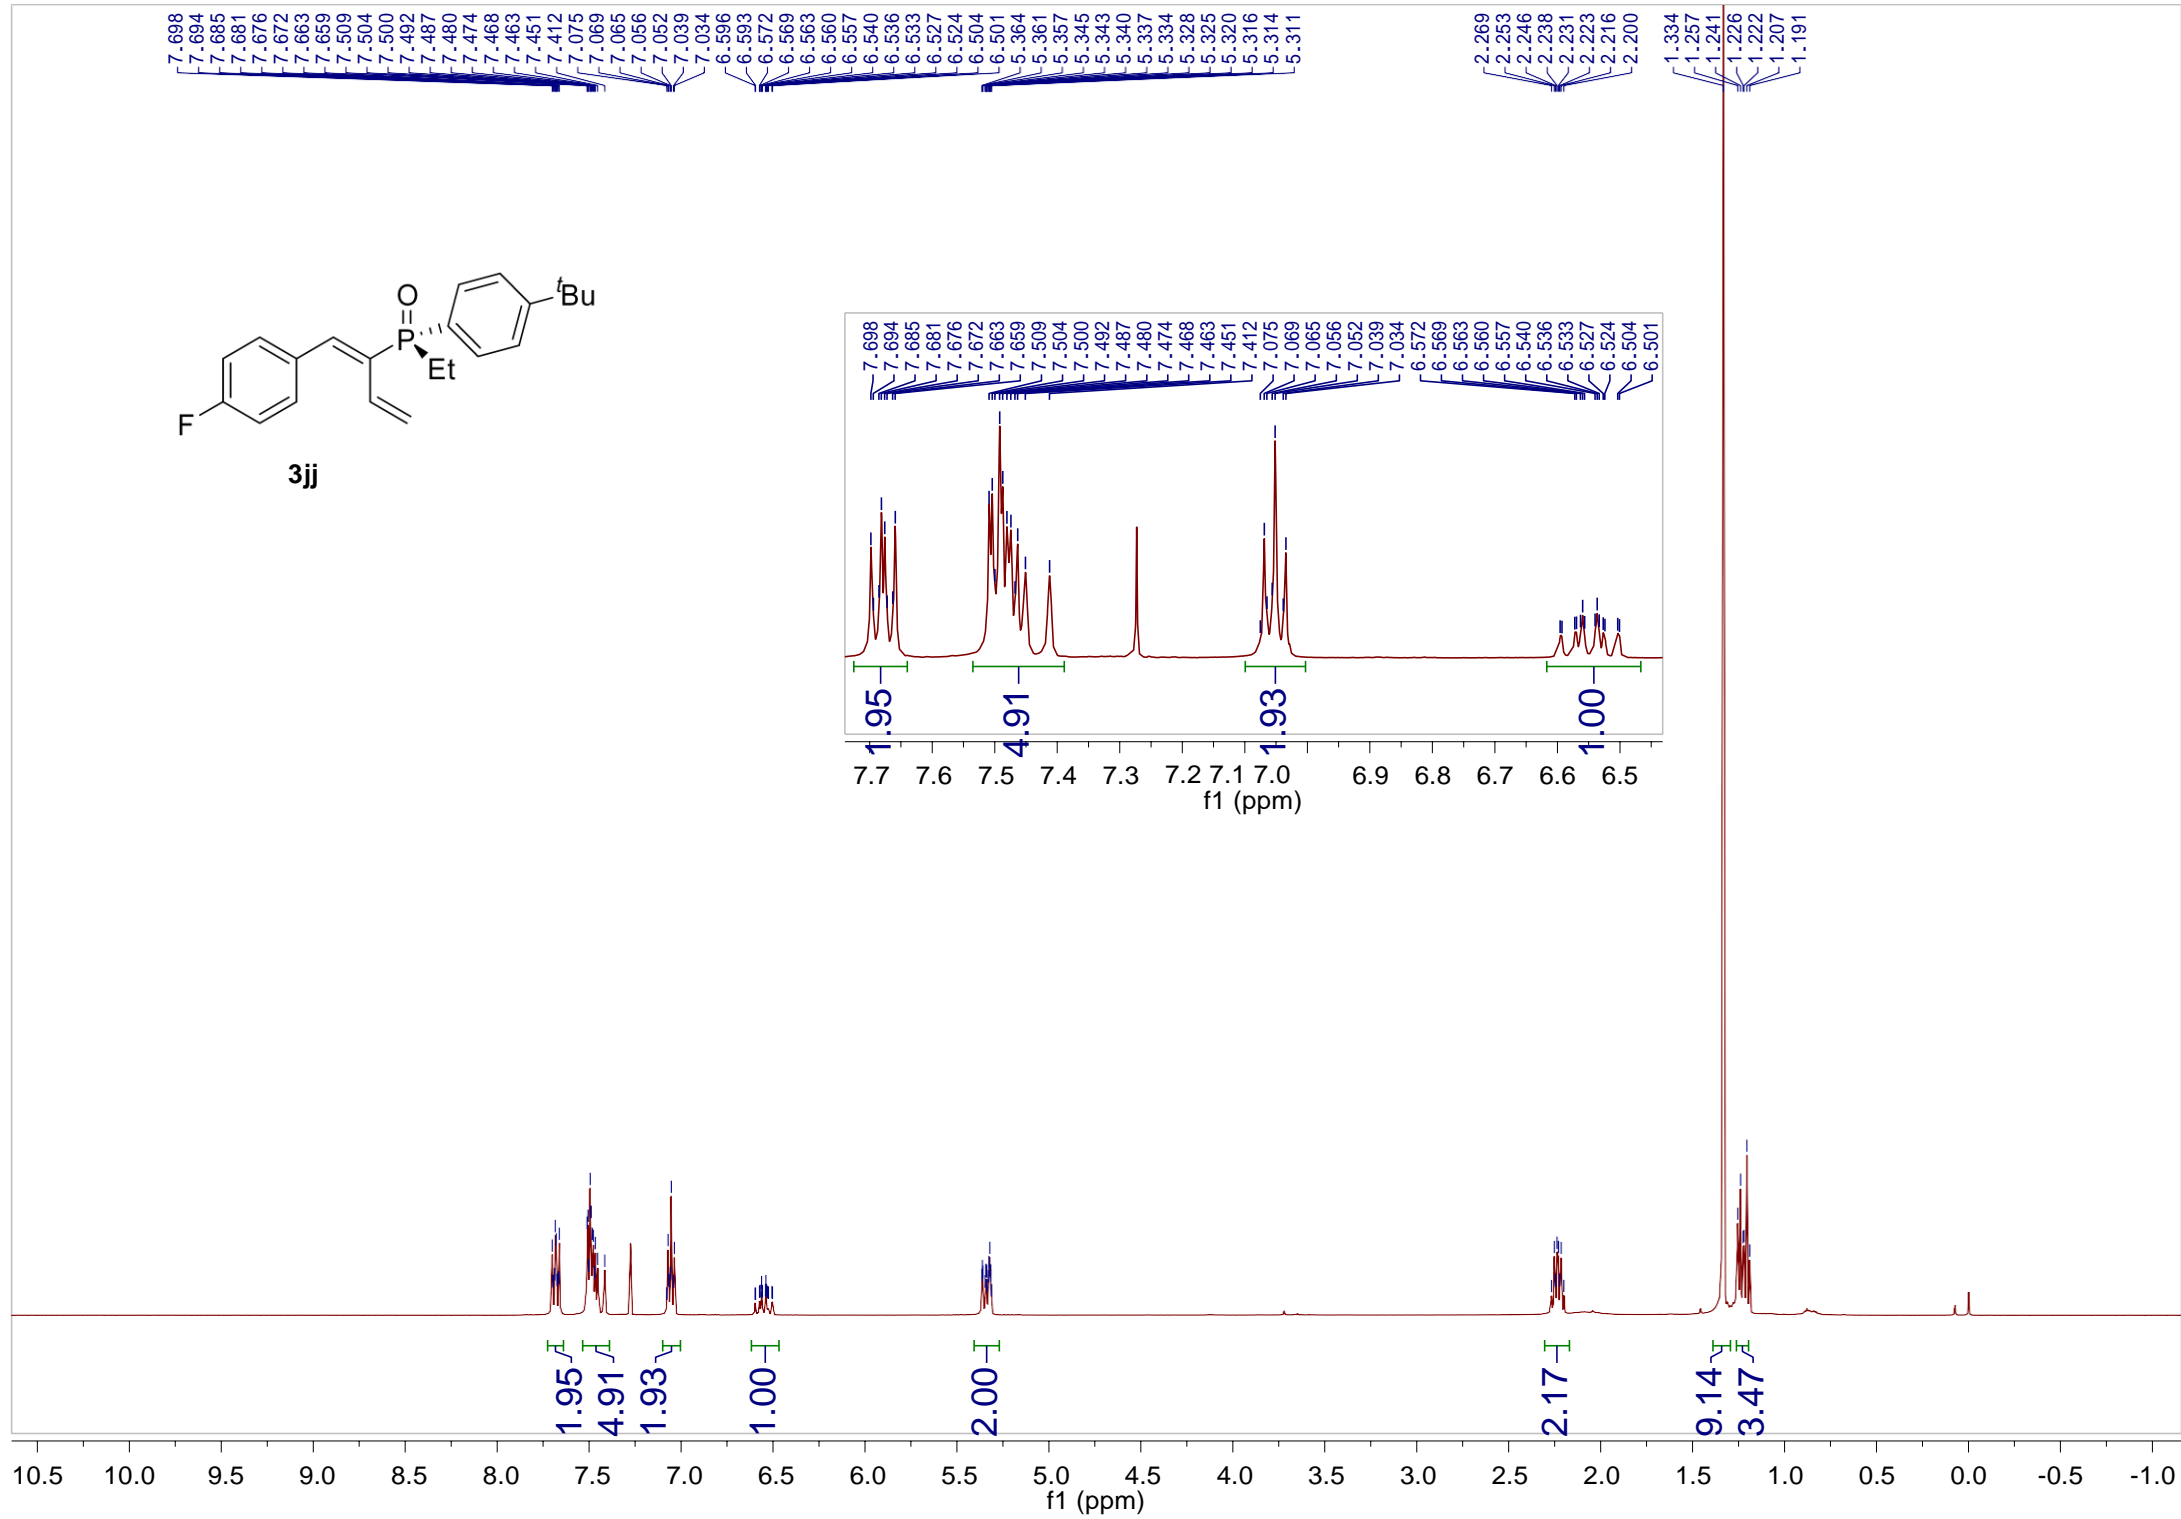



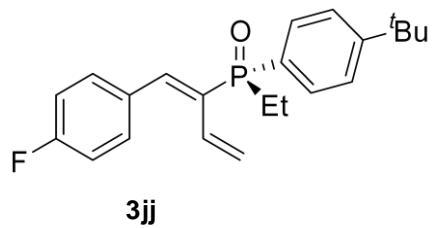

163.687  
 161.701  
 155.184  
 155.162  
 141.289  
 141.229  
 131.943  
 131.879  
 131.707  
 131.681  
 131.575  
 131.549  
 131.483  
 131.421  
 131.215  
 130.694  
 130.618  
 129.778  
 128.987  
 125.681  
 125.589  
 121.091  
 121.044  
 115.428  
 115.256

34.945  
 31.070  
 20.405  
 19.817  
 5.436  
 5.396

200 190 180 170 160 150 140 130 120 110 100 90 80 70 60 50 40 30 20 10 0 -10

f1 (ppm)

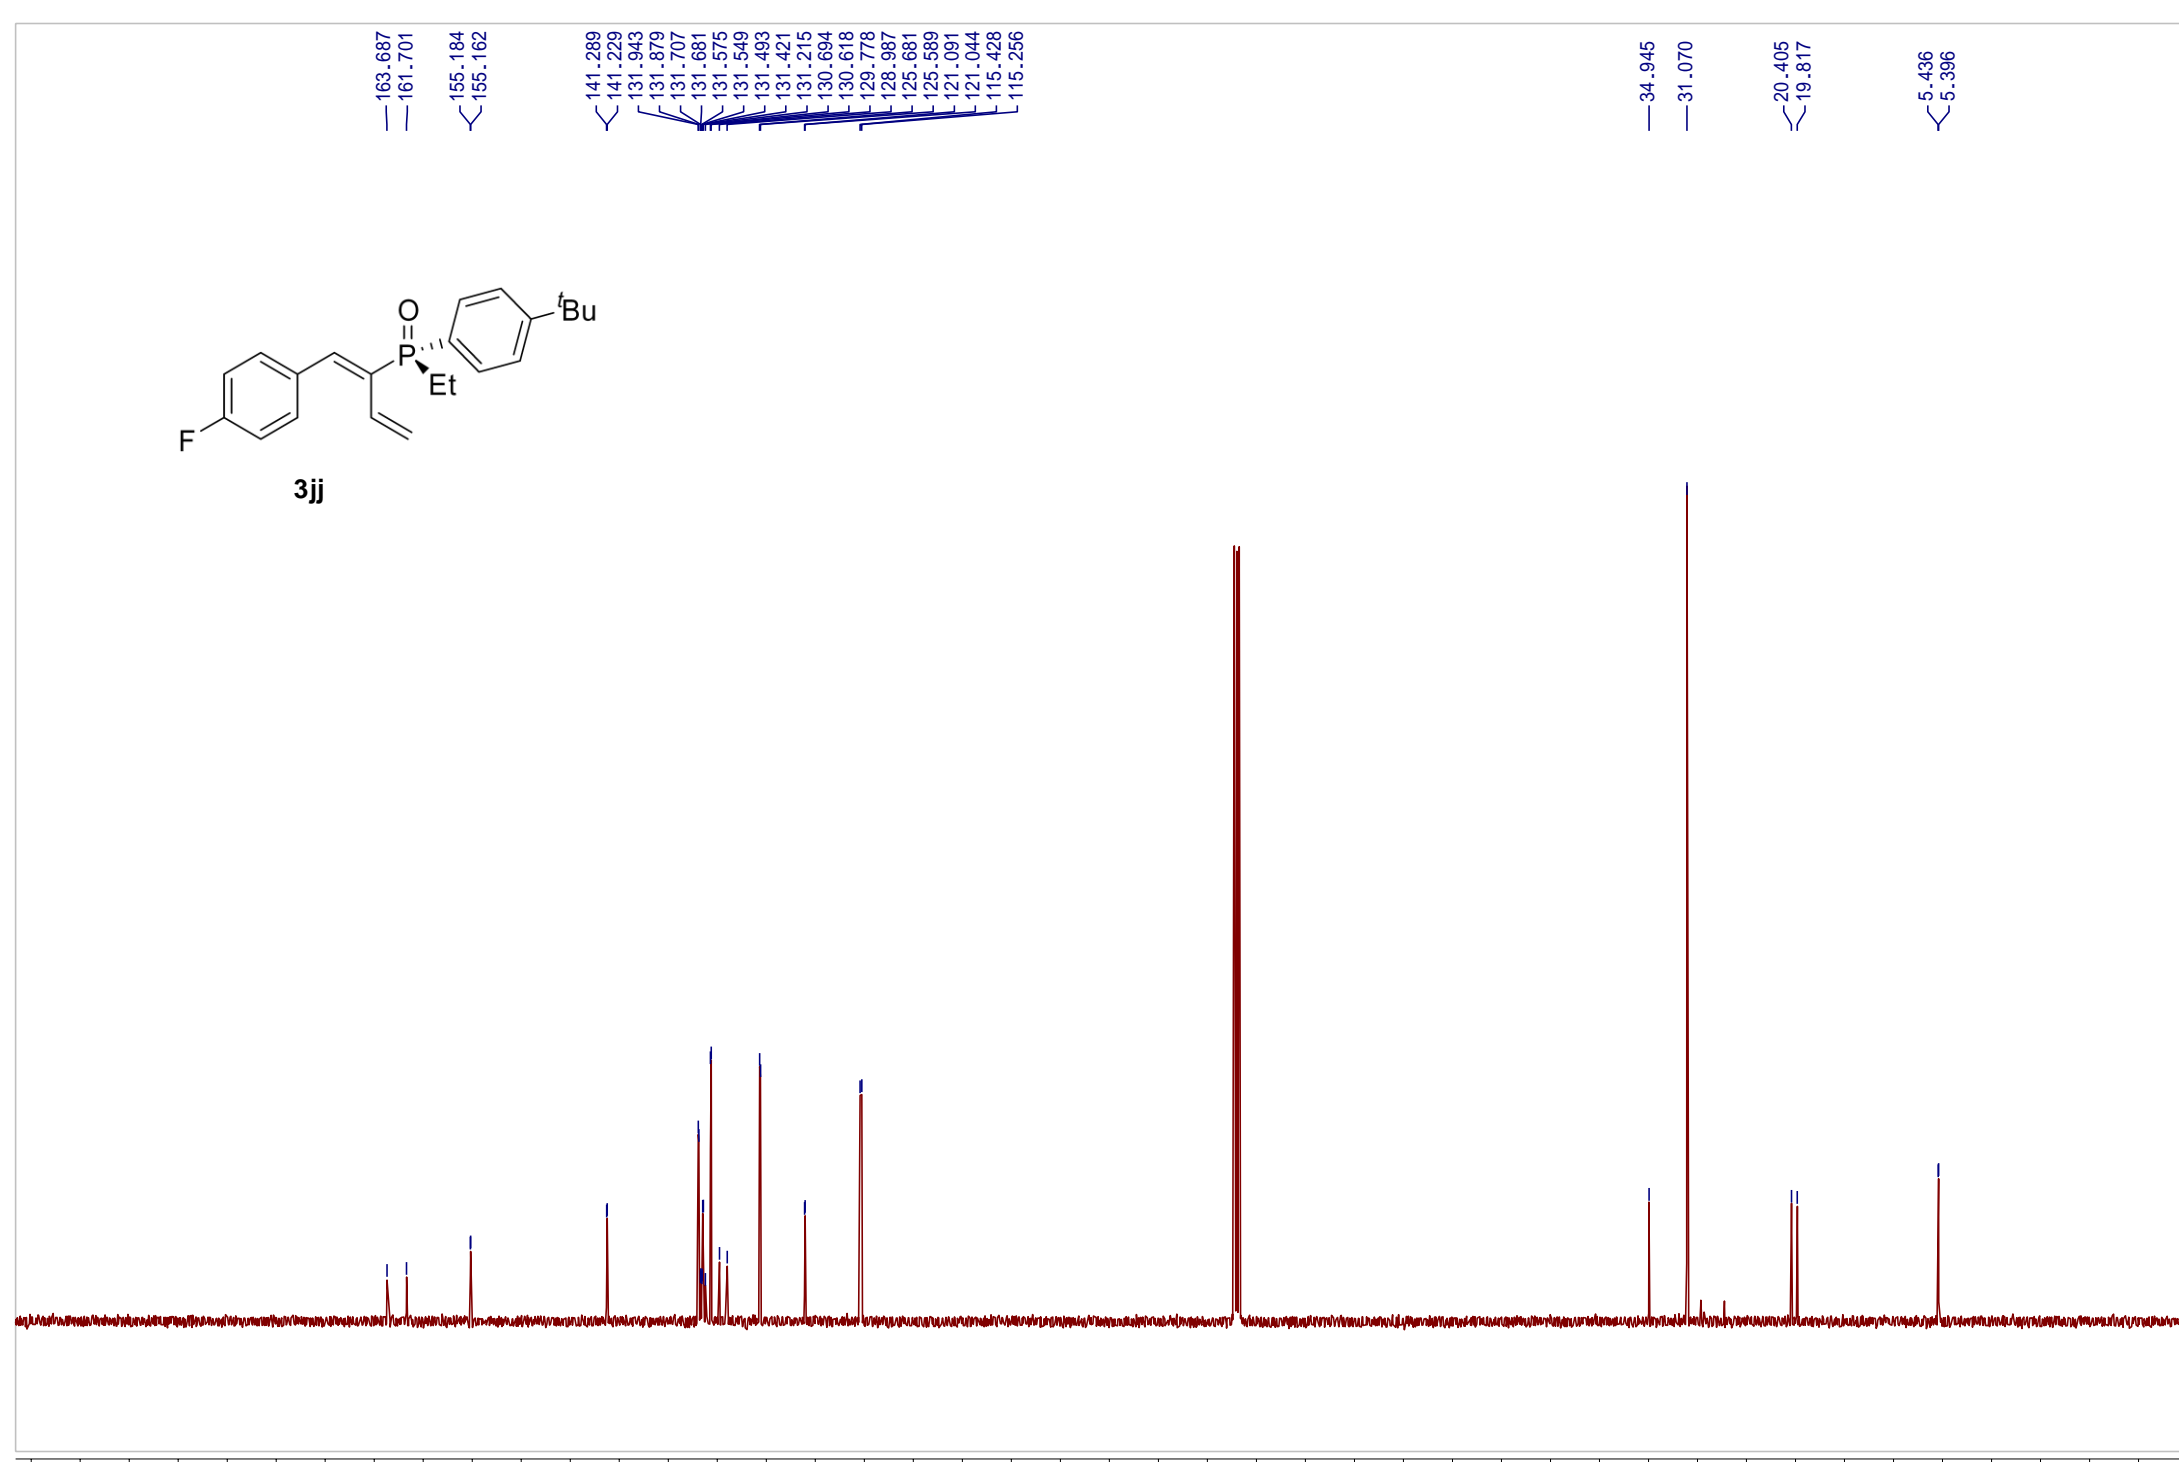

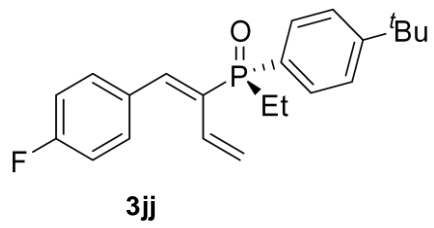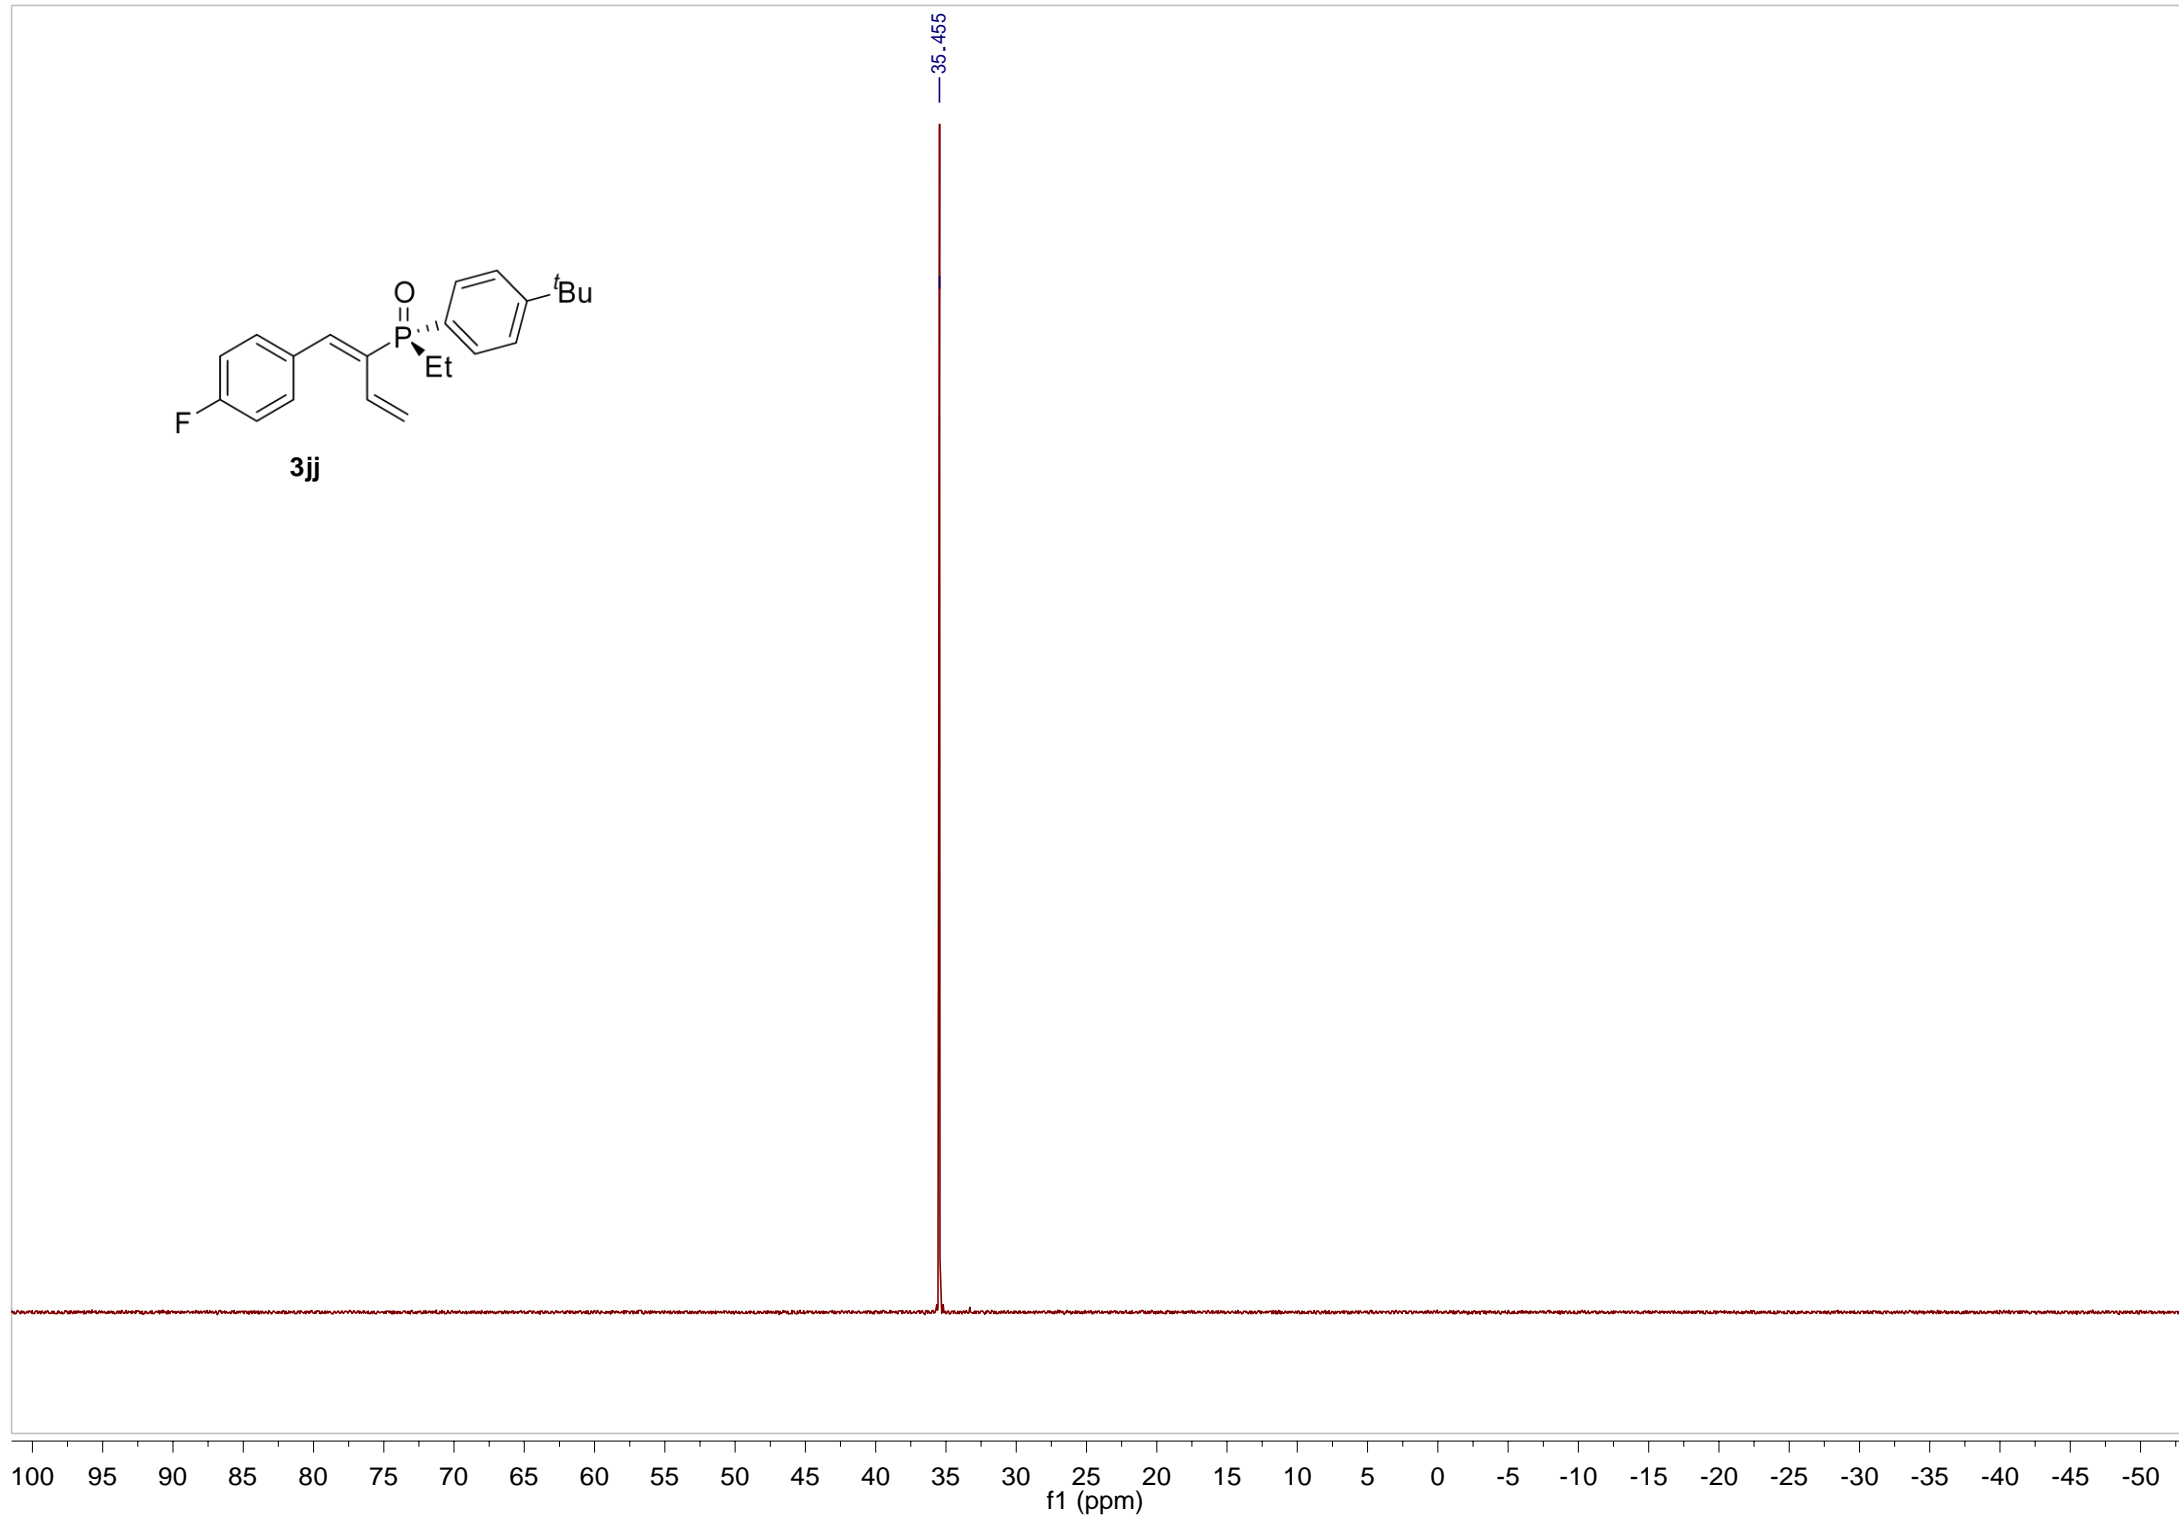

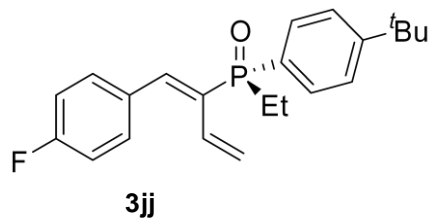

-111.580

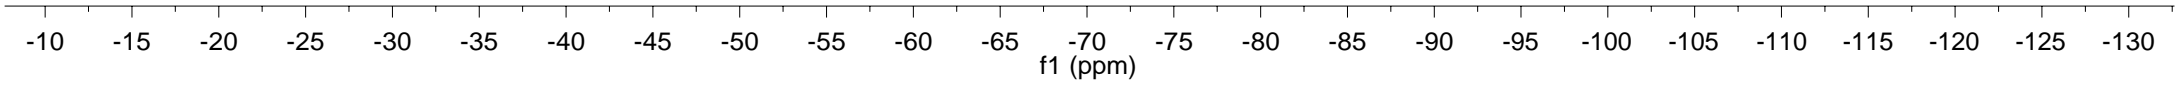

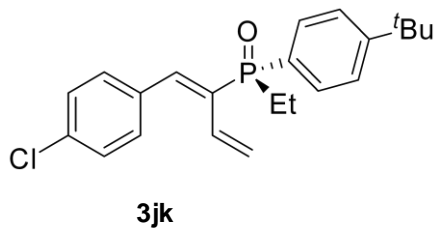

7.695  
7.679  
7.673  
7.657  
7.510  
7.505  
7.494  
7.489  
7.442  
7.427  
7.410  
7.404  
7.340  
7.323  
6.583  
6.560  
6.549  
6.526  
6.515  
6.492

5.365  
5.361  
5.345  
5.340  
5.329  
5.323  
5.317

2.267  
2.252  
2.245  
2.237  
2.230  
2.222  
2.214  
2.199

1.334  
1.255  
1.240  
1.225  
1.221  
1.206  
1.190

10.5 10.0 9.5 9.0 8.5 8.0 7.5 7.0 6.5 6.0 5.5 5.0 4.5 4.0 3.5 3.0 2.5 2.0 1.5 1.0 0.5 0.0 -0.5 -1.0

f1 (ppm)

2.00

2.13

2.96

2.02

1.00

2.07

2.04

9.18

3.27

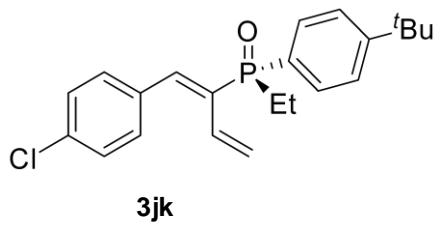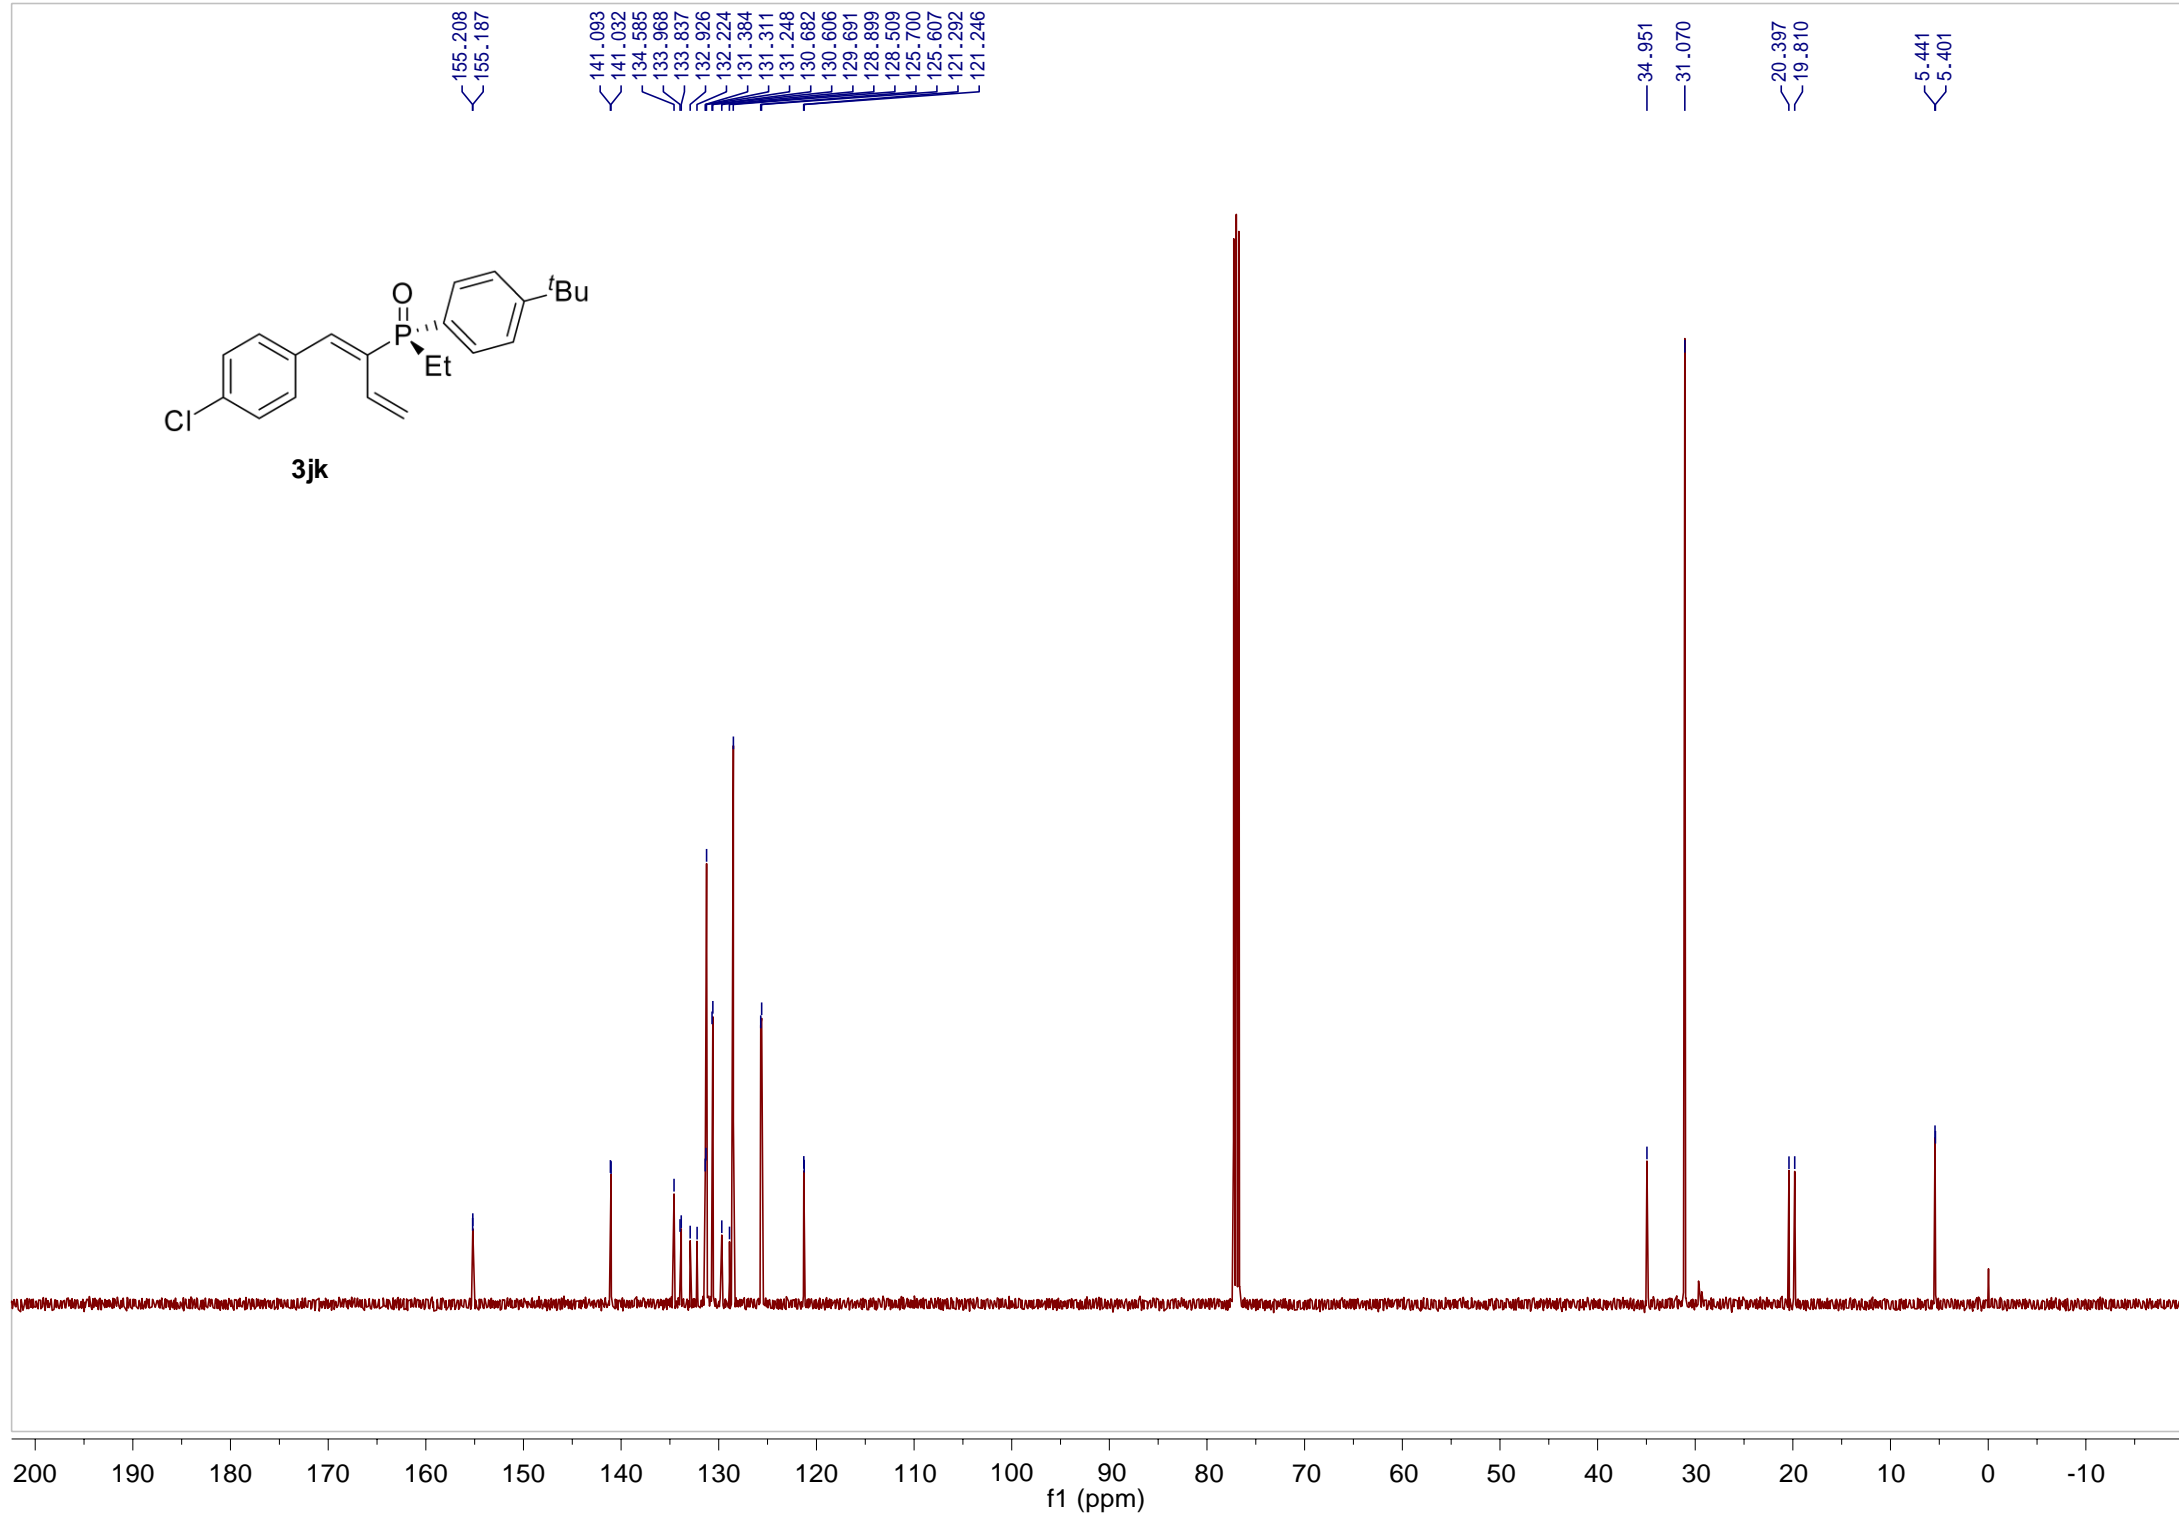

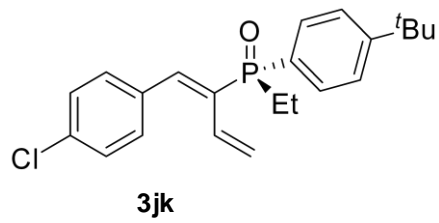

— 35.402

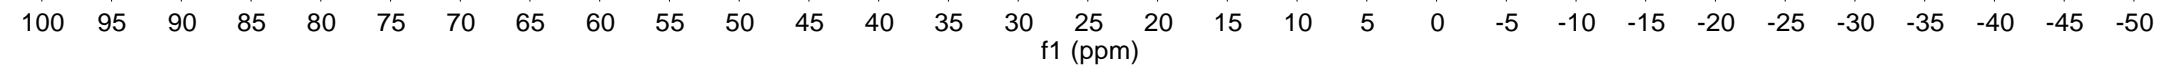

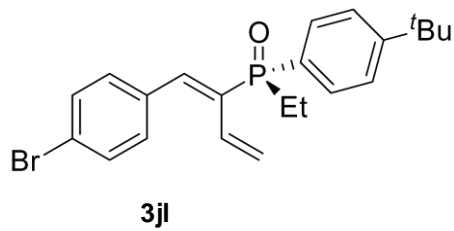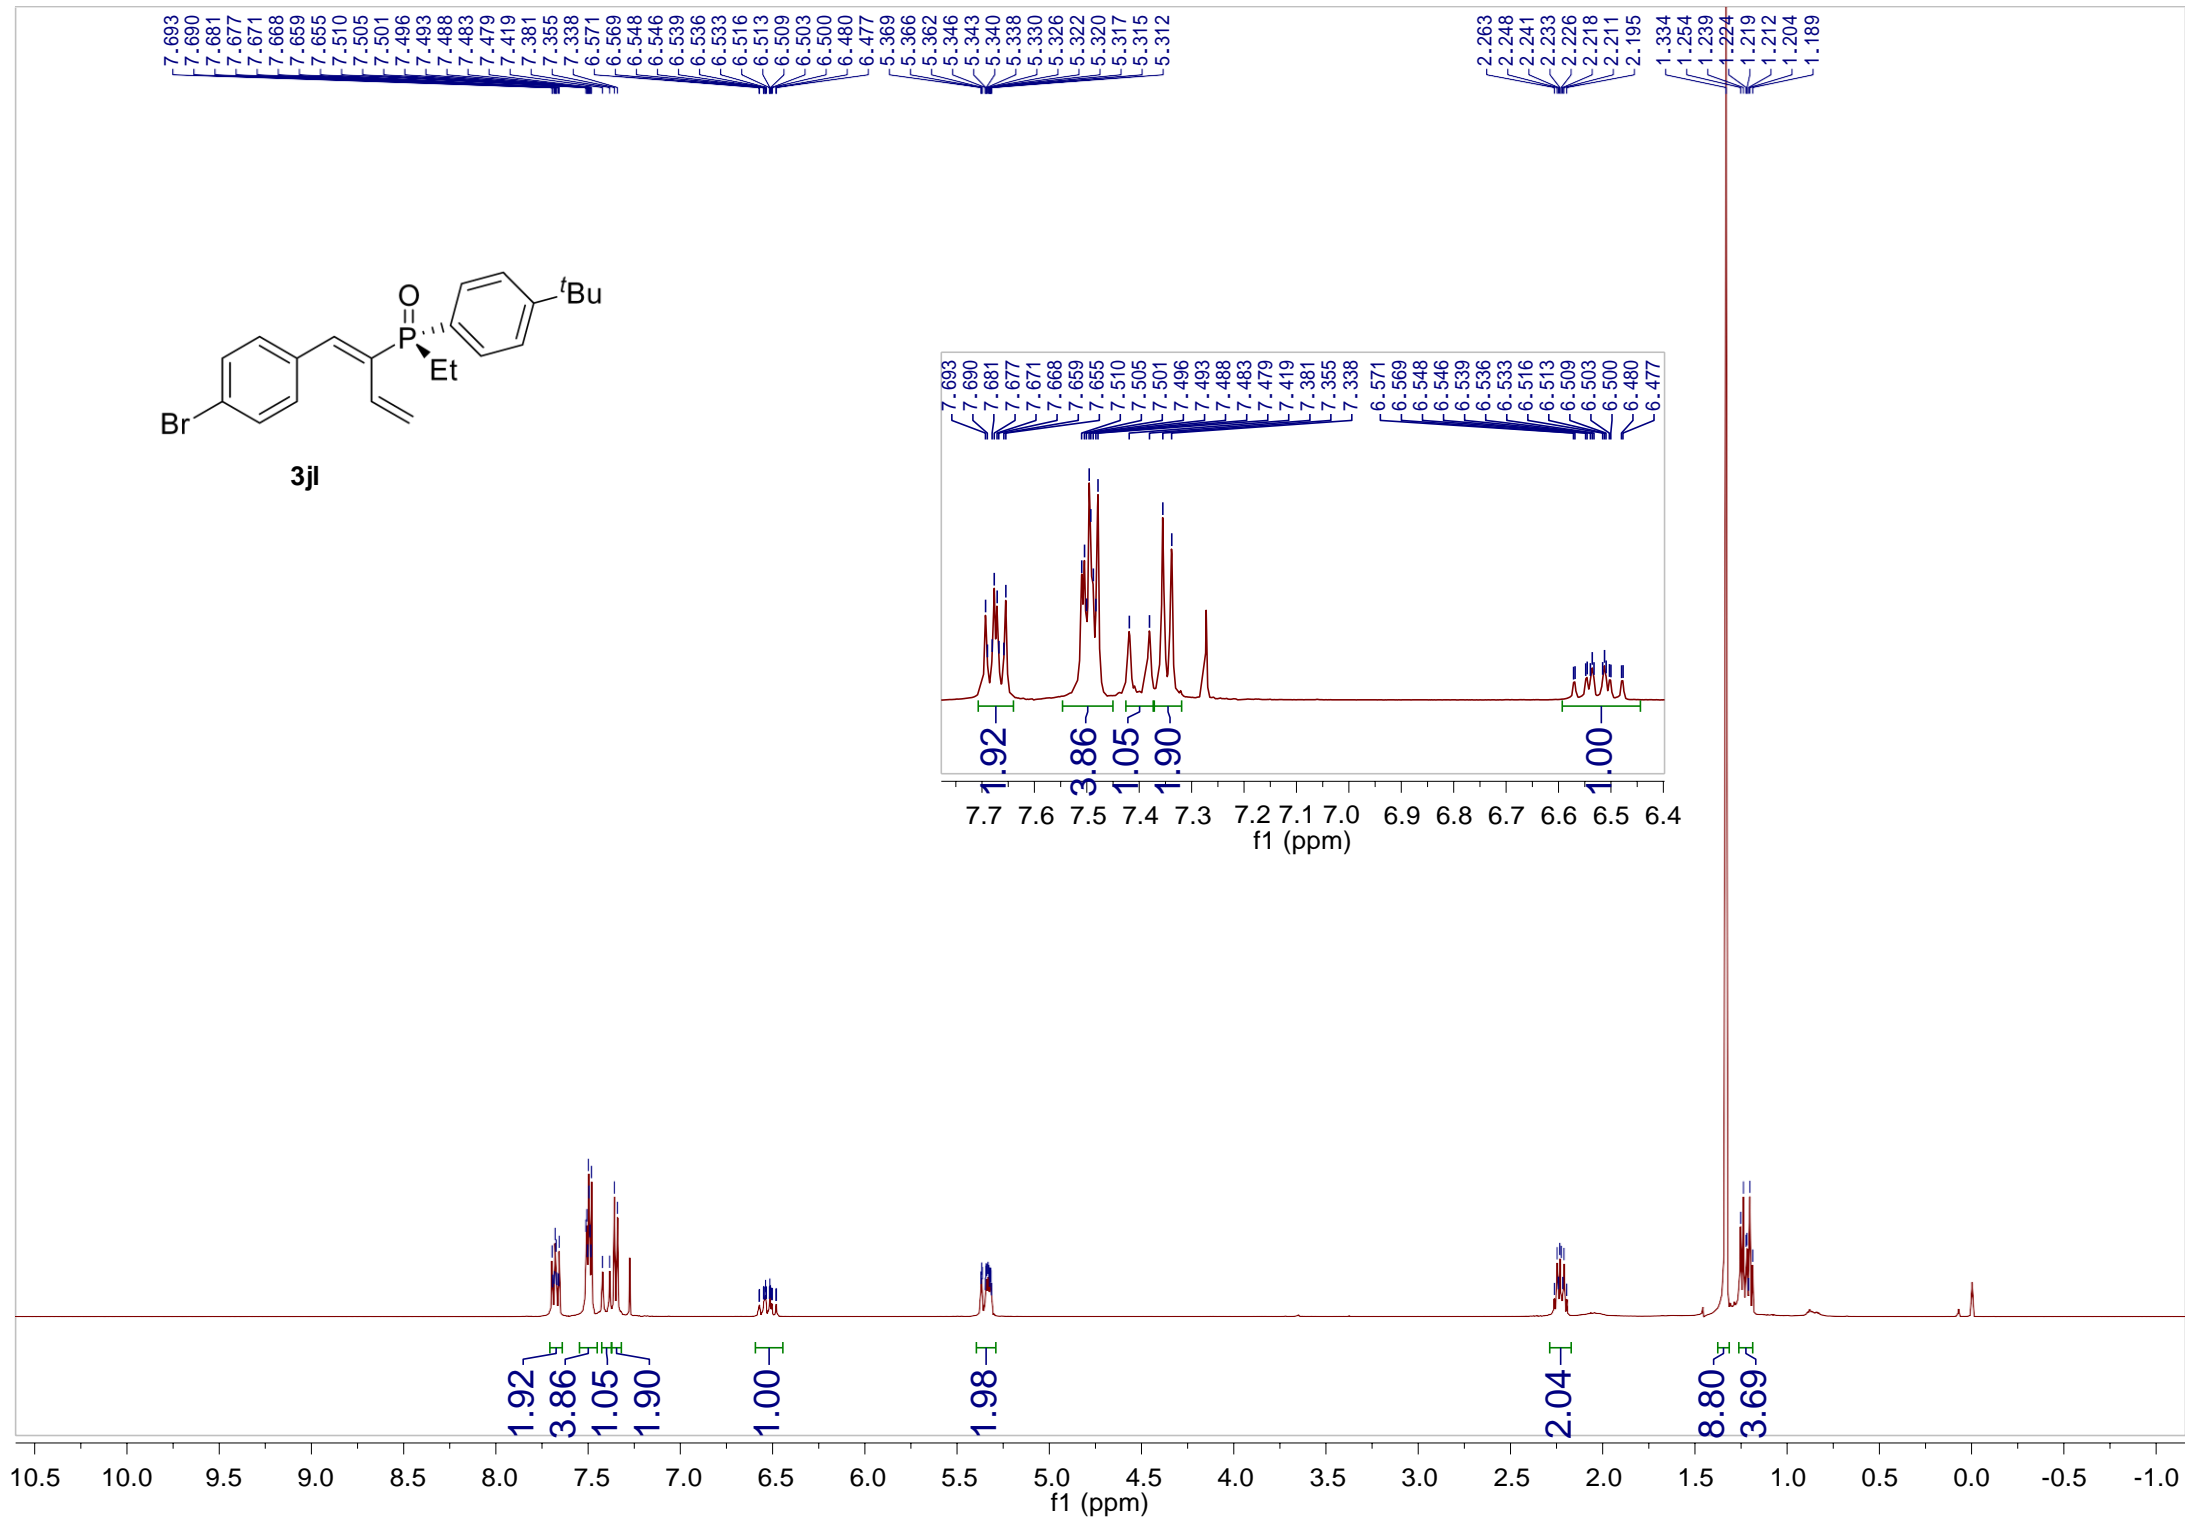

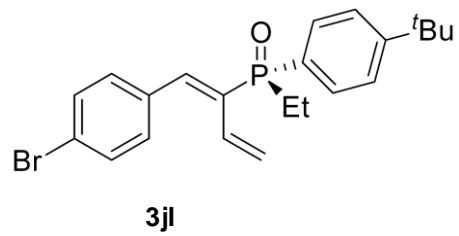

155.098  
 138.961  
 138.812  
 134.744  
 134.675  
 132.202  
 131.476  
 131.405  
 130.685  
 130.608  
 129.939  
 129.284  
 129.144  
 128.667  
 127.941  
 127.140  
 125.636  
 125.543  
 122.115  
 122.065

34.947  
 31.089  
 20.367  
 19.776  
 5.394  
 5.354

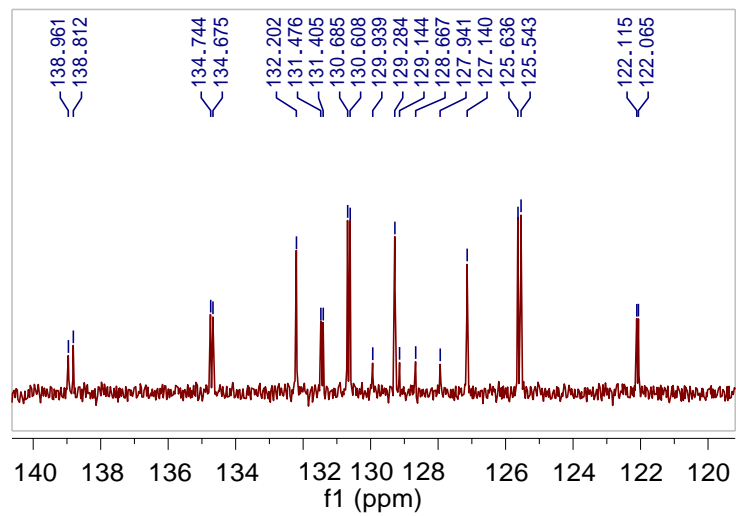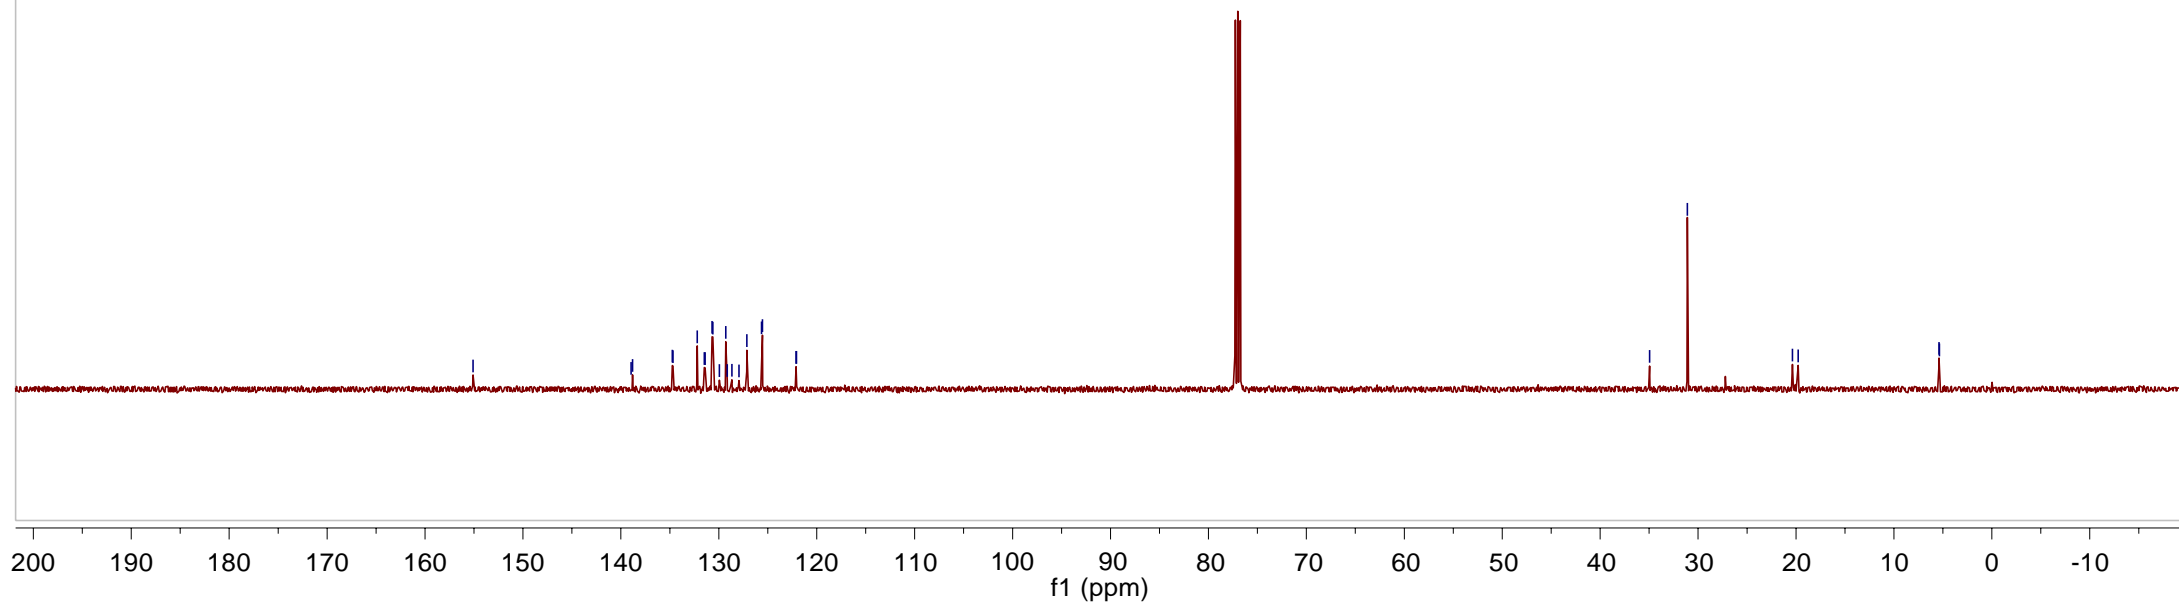



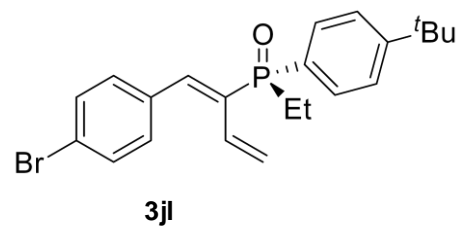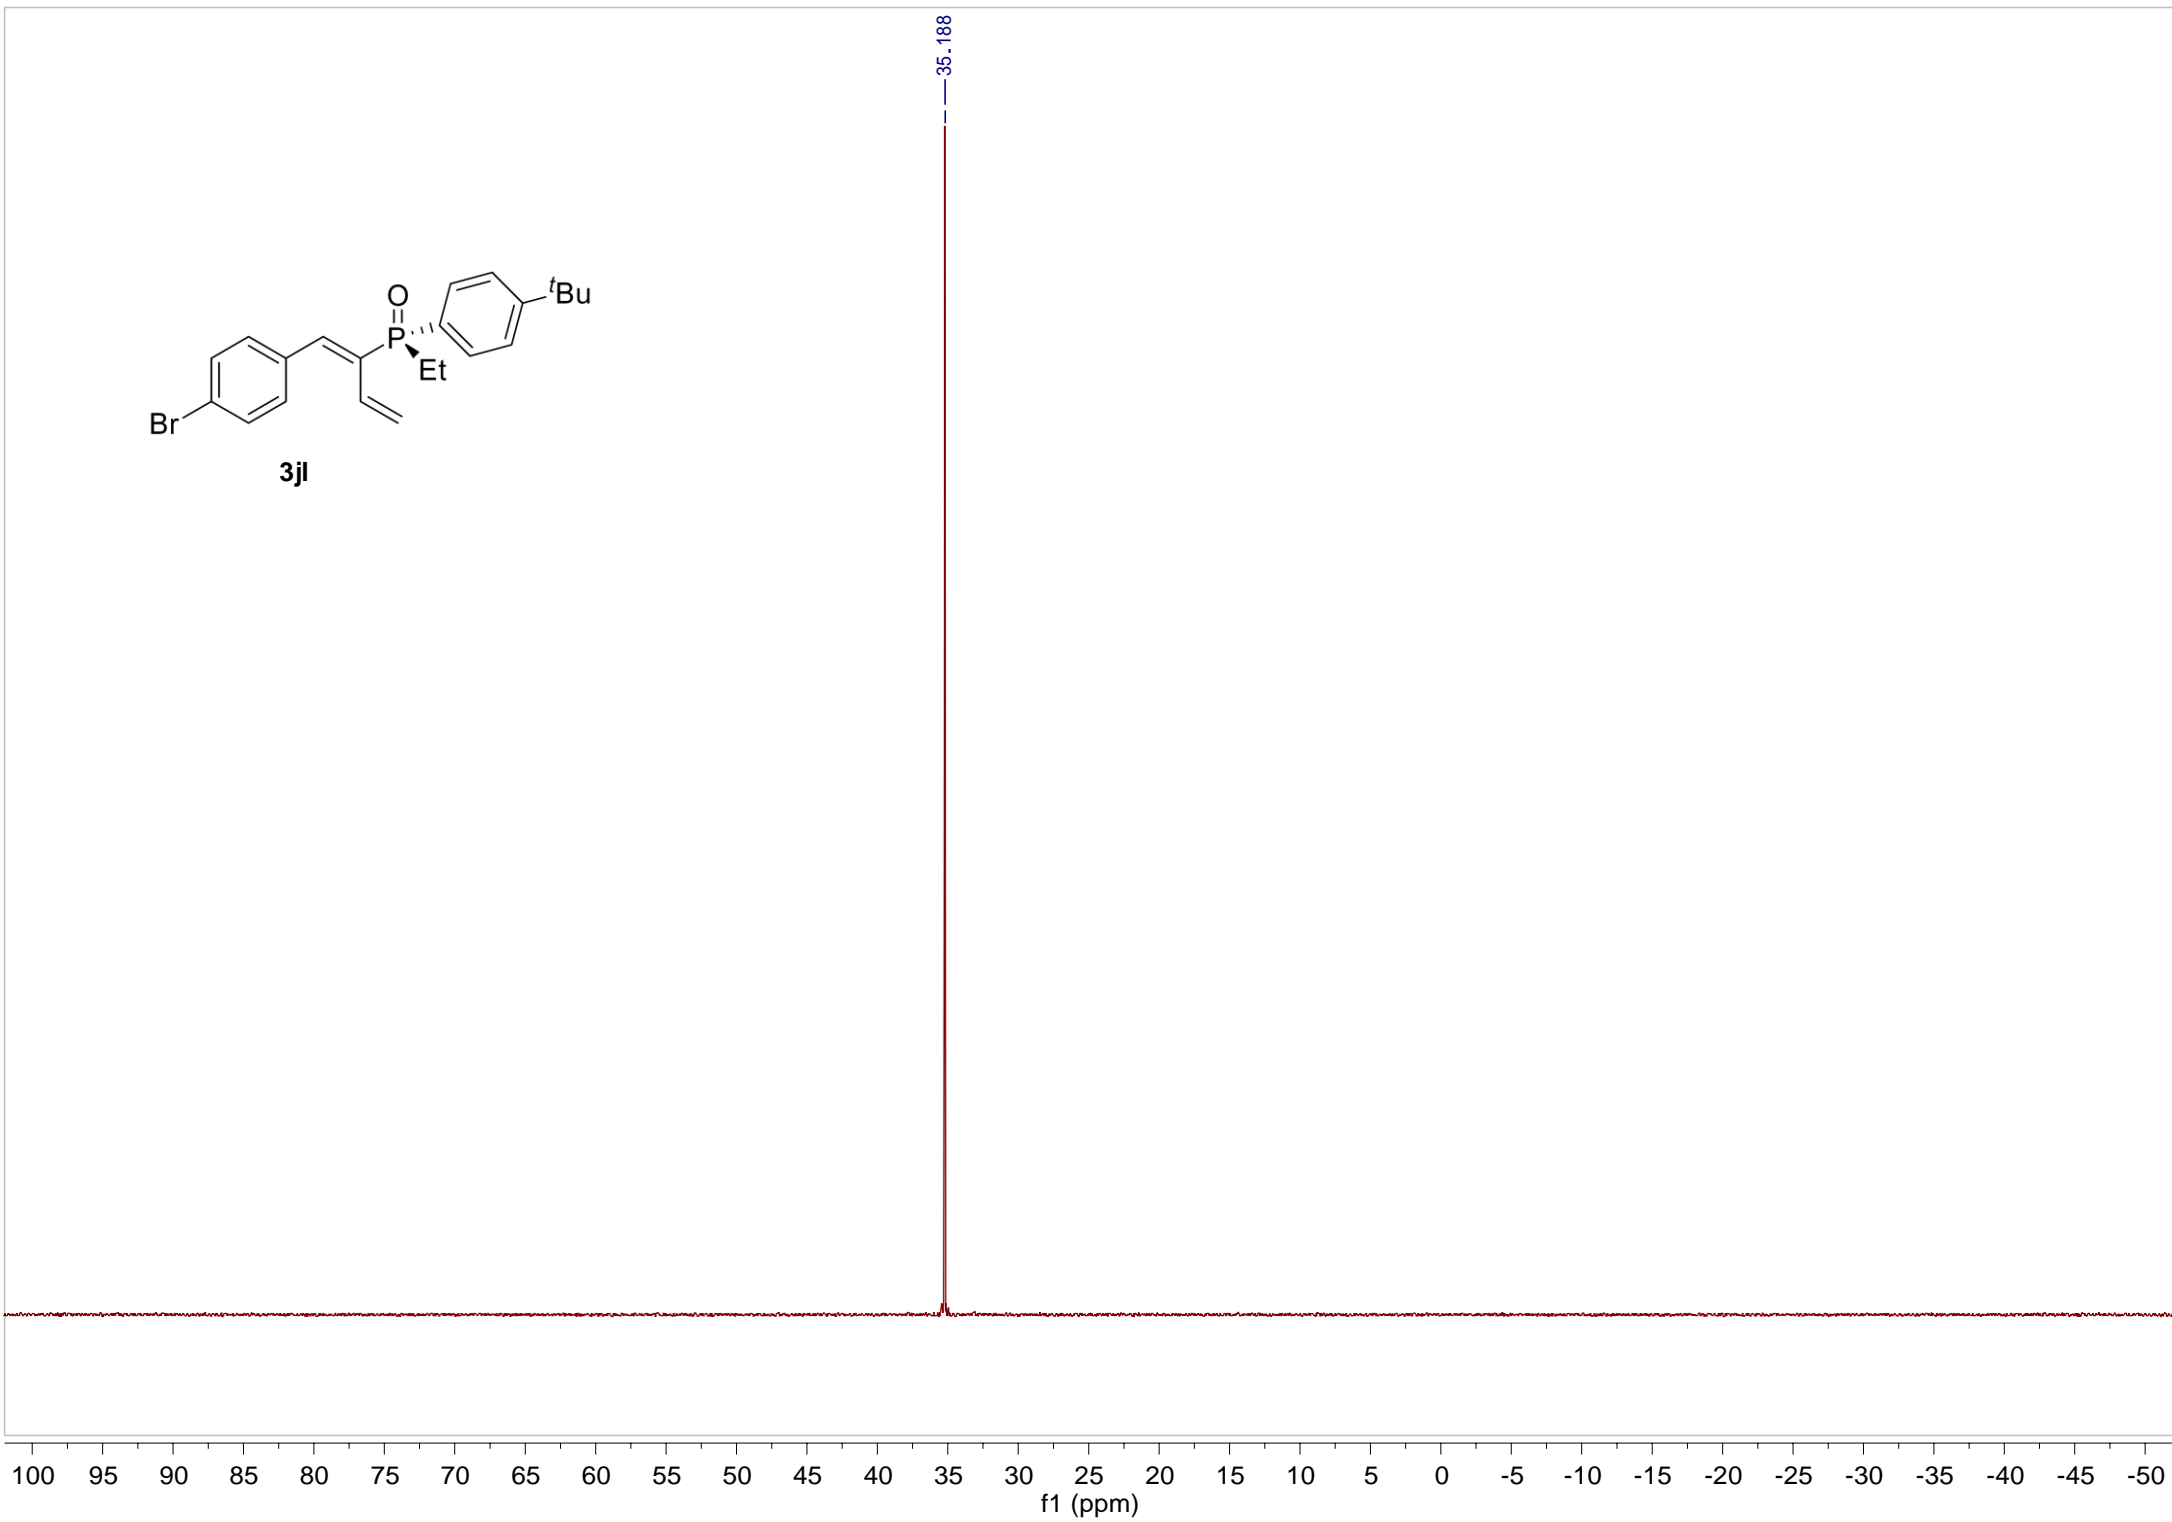

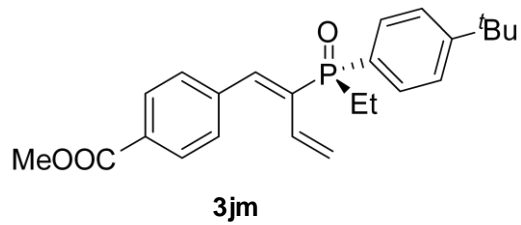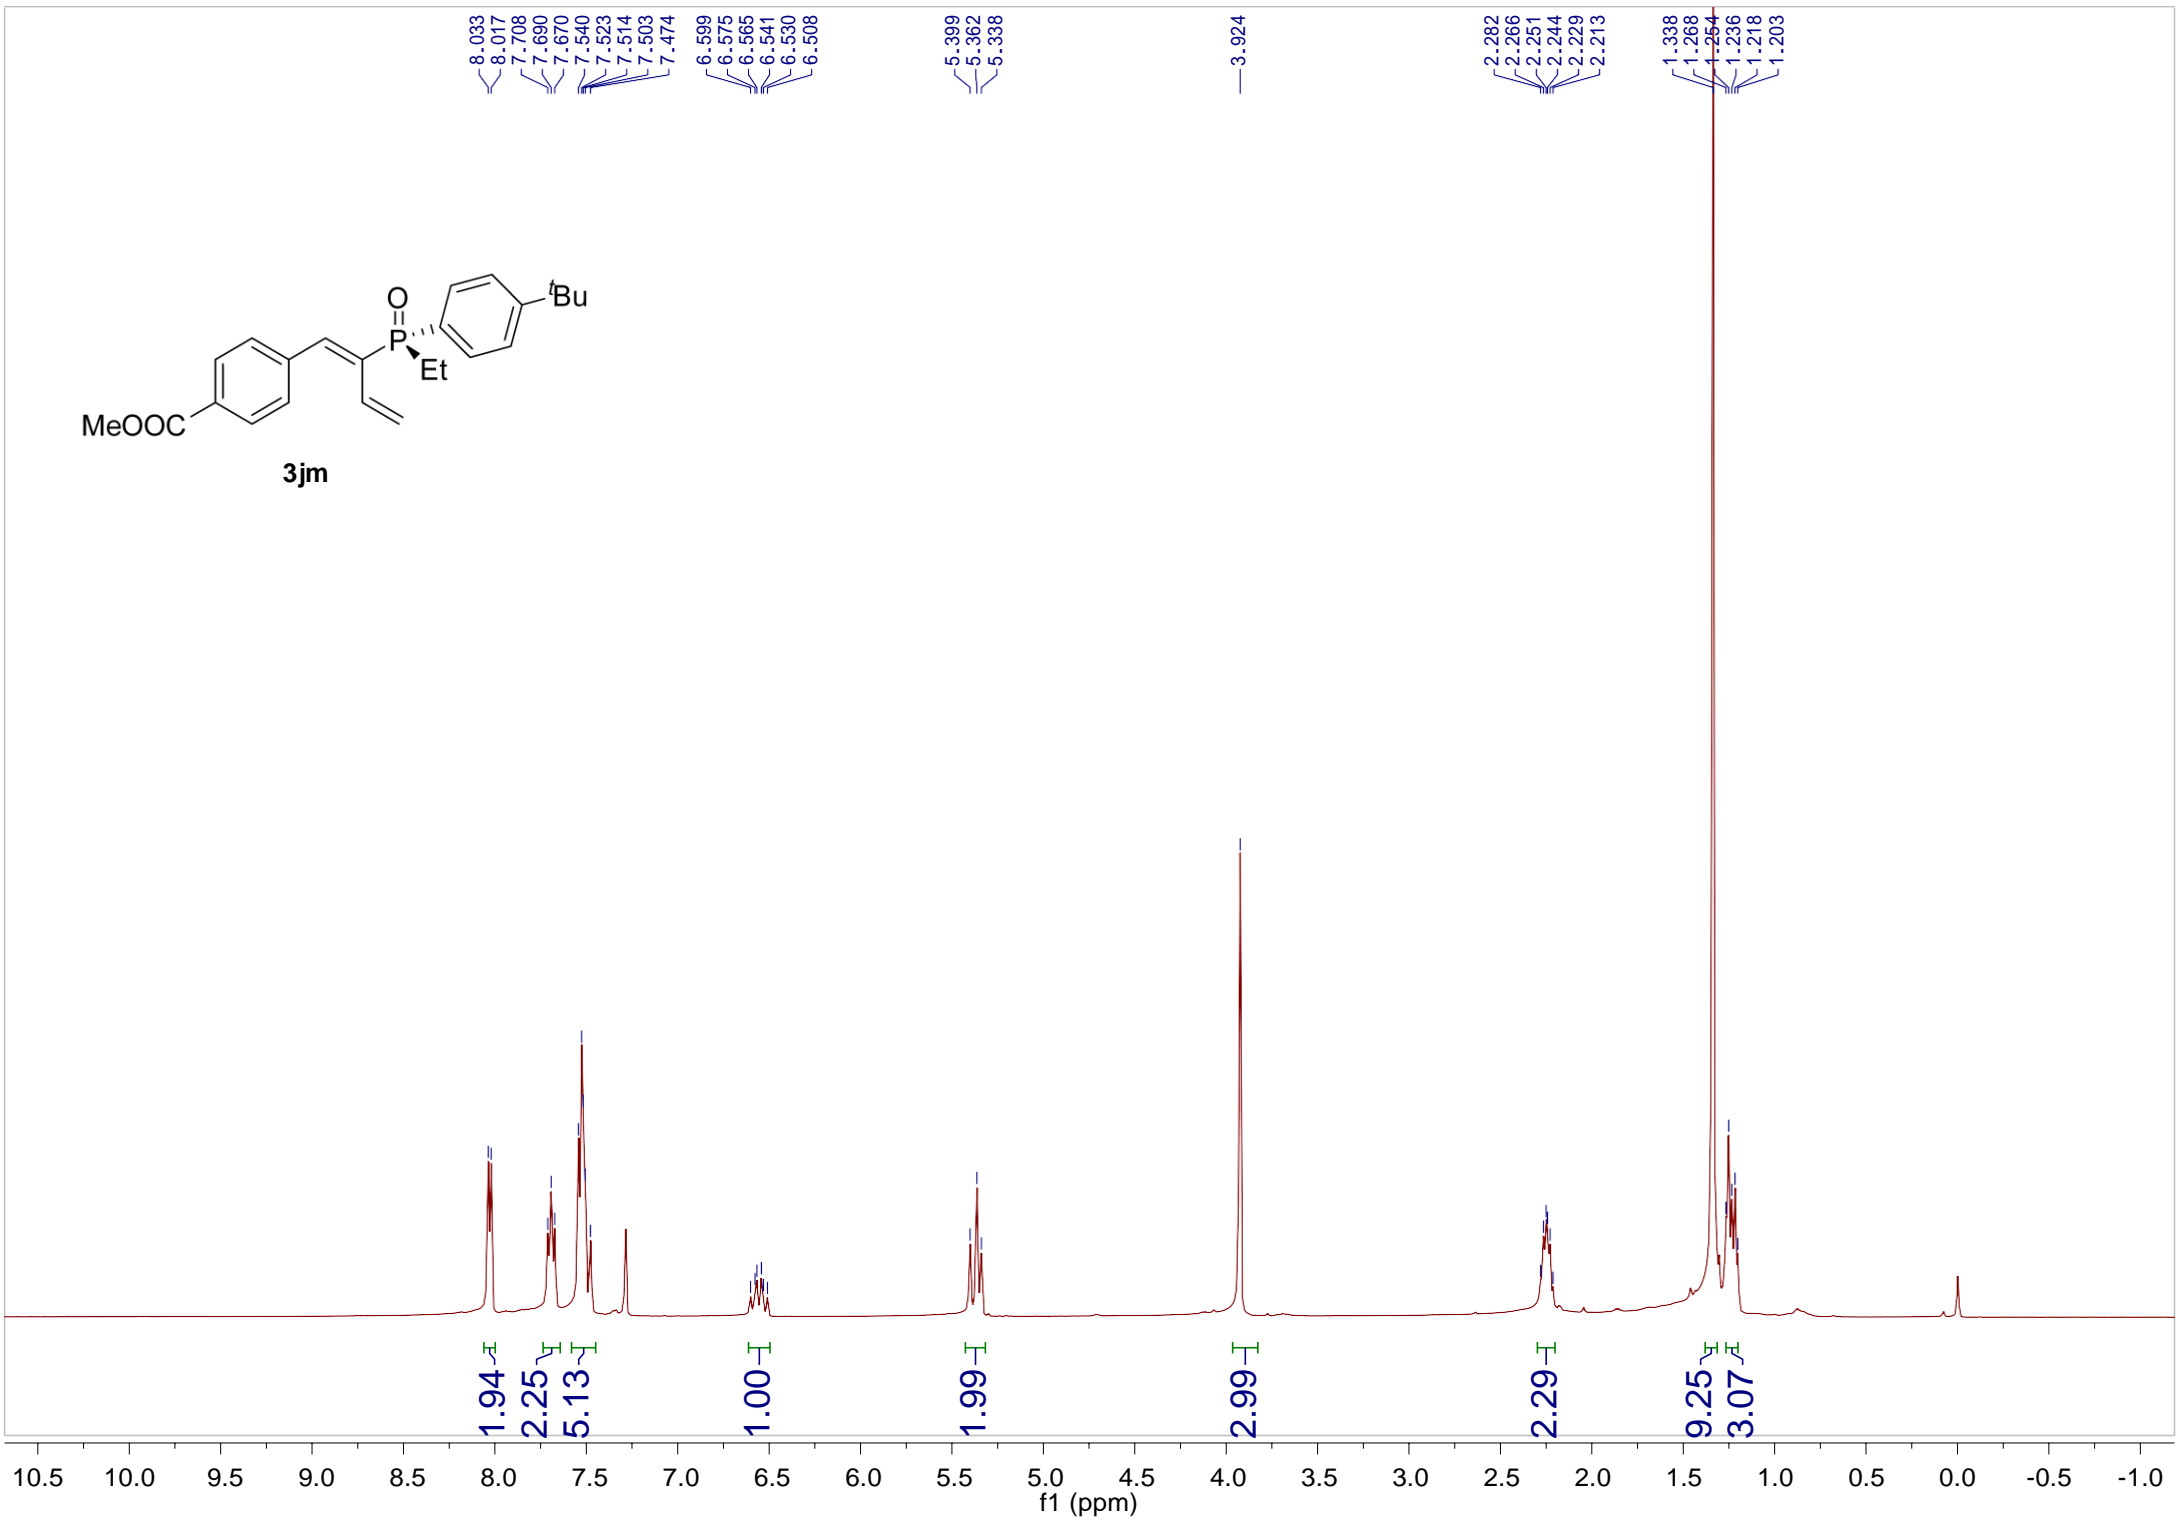

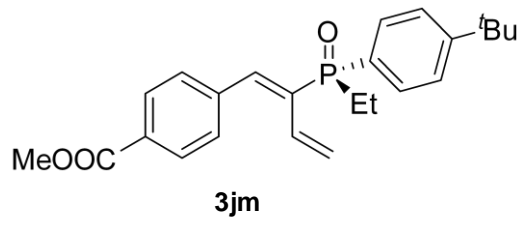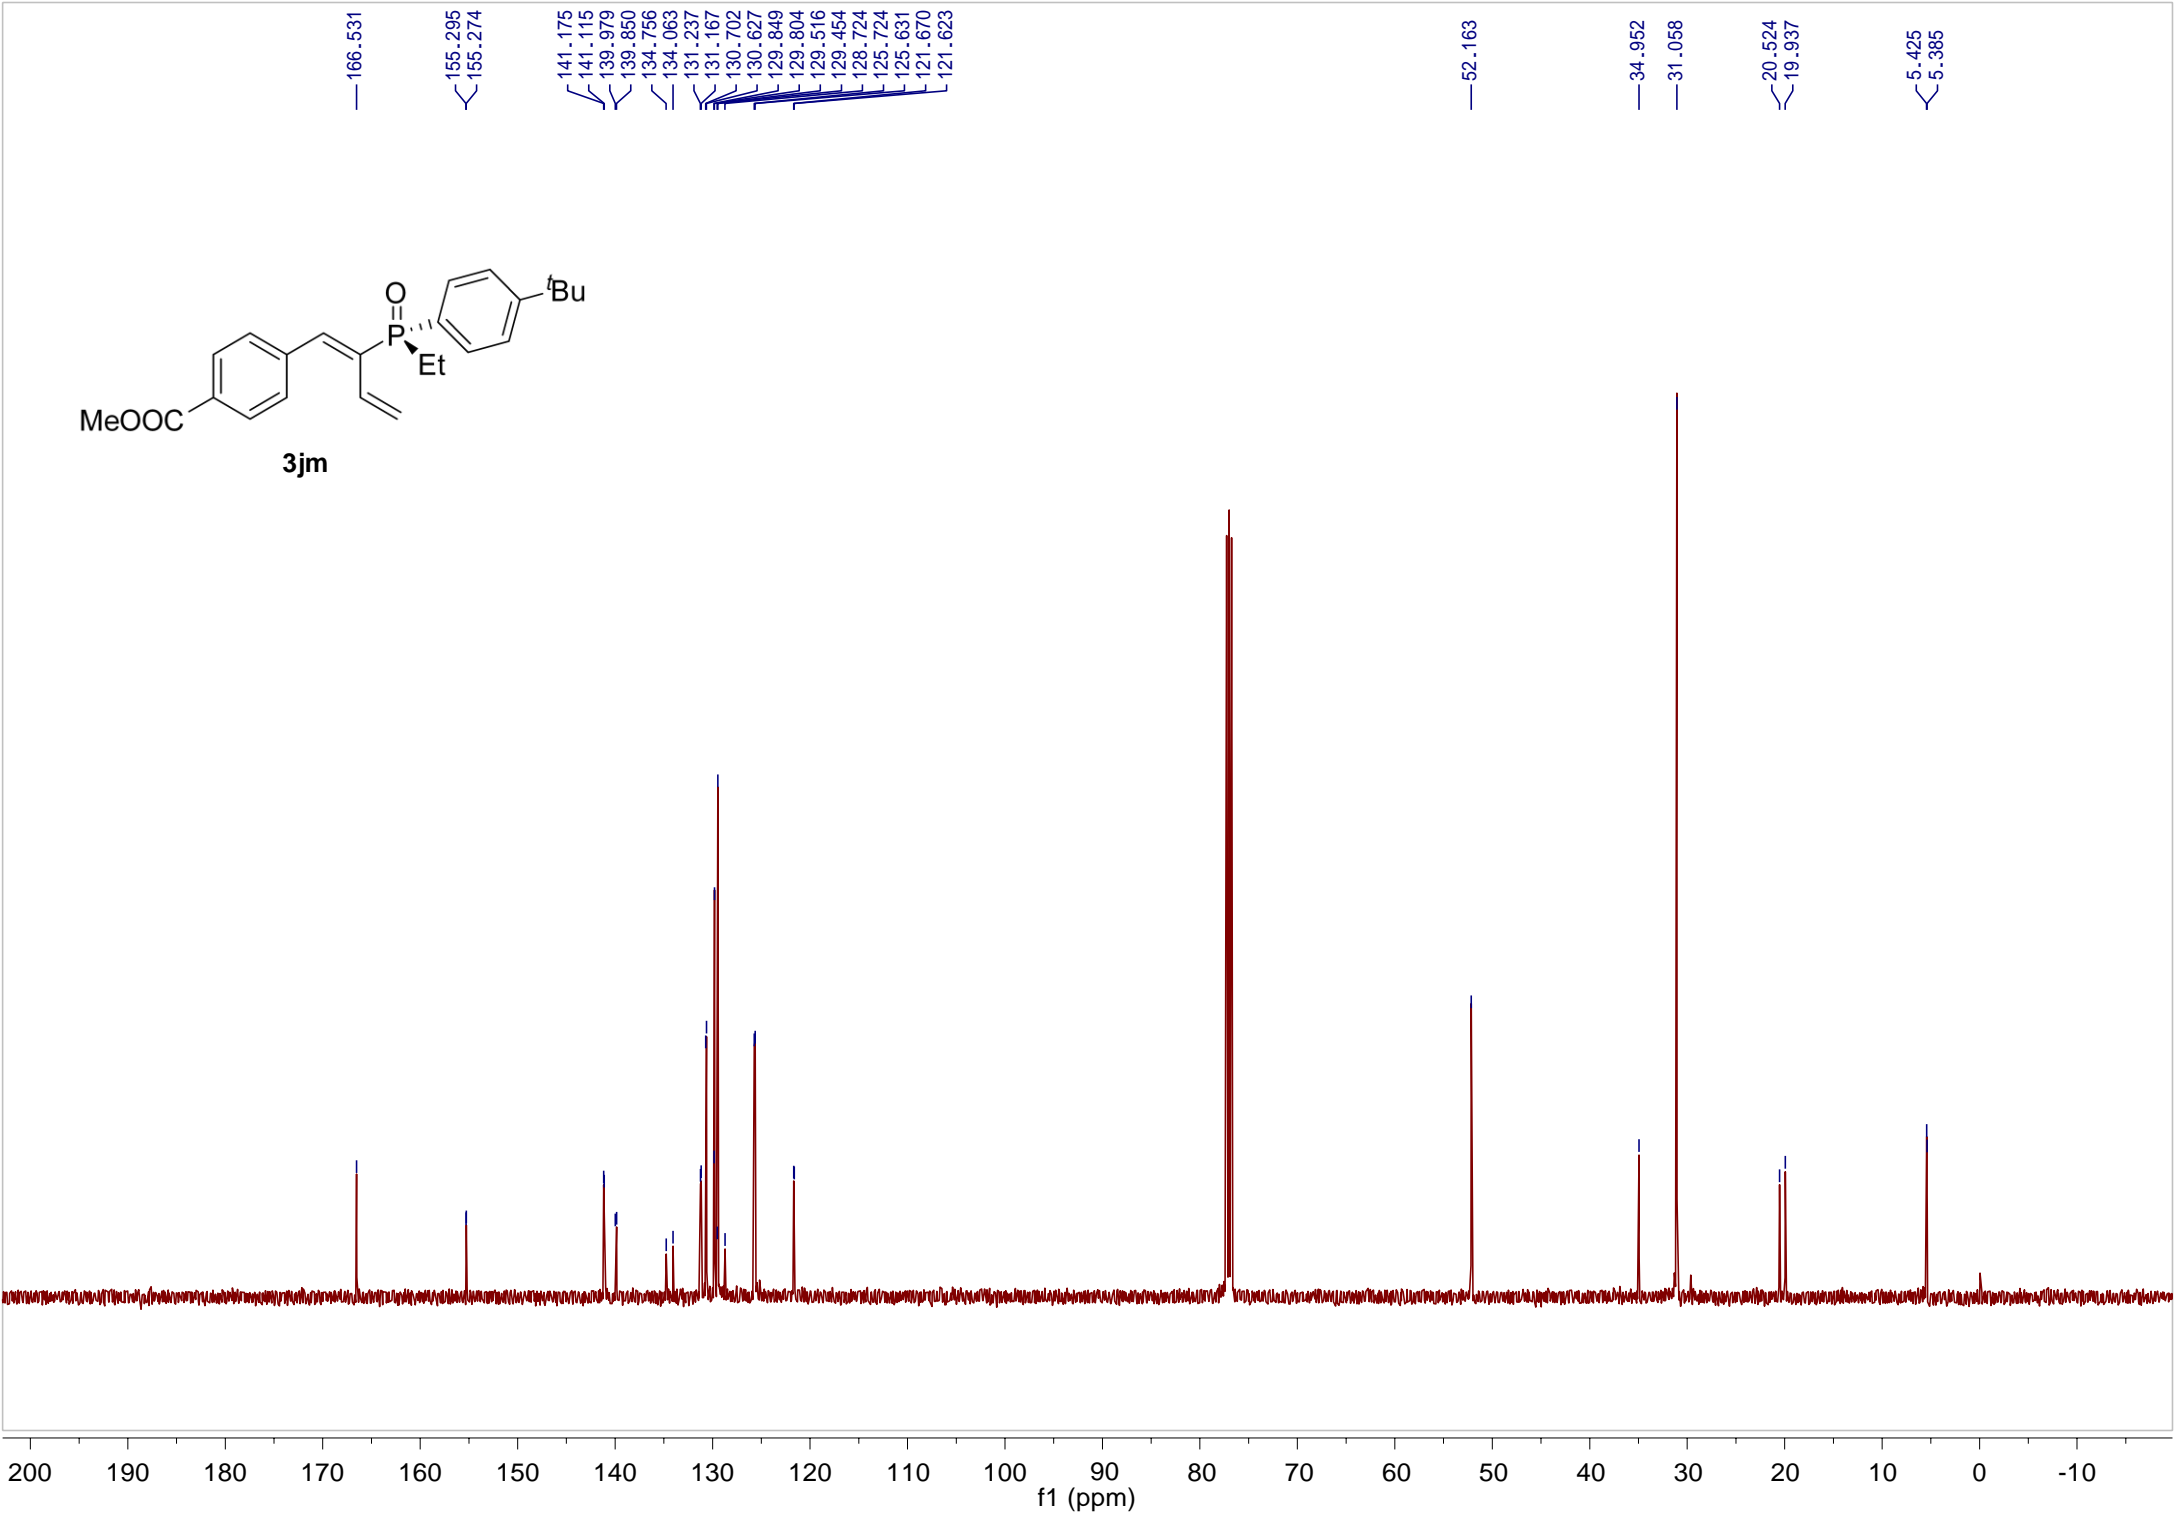

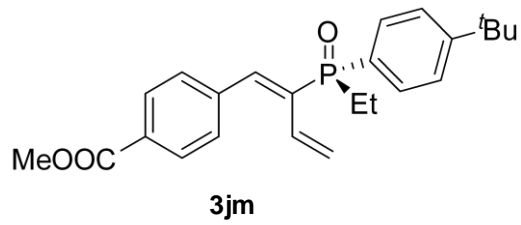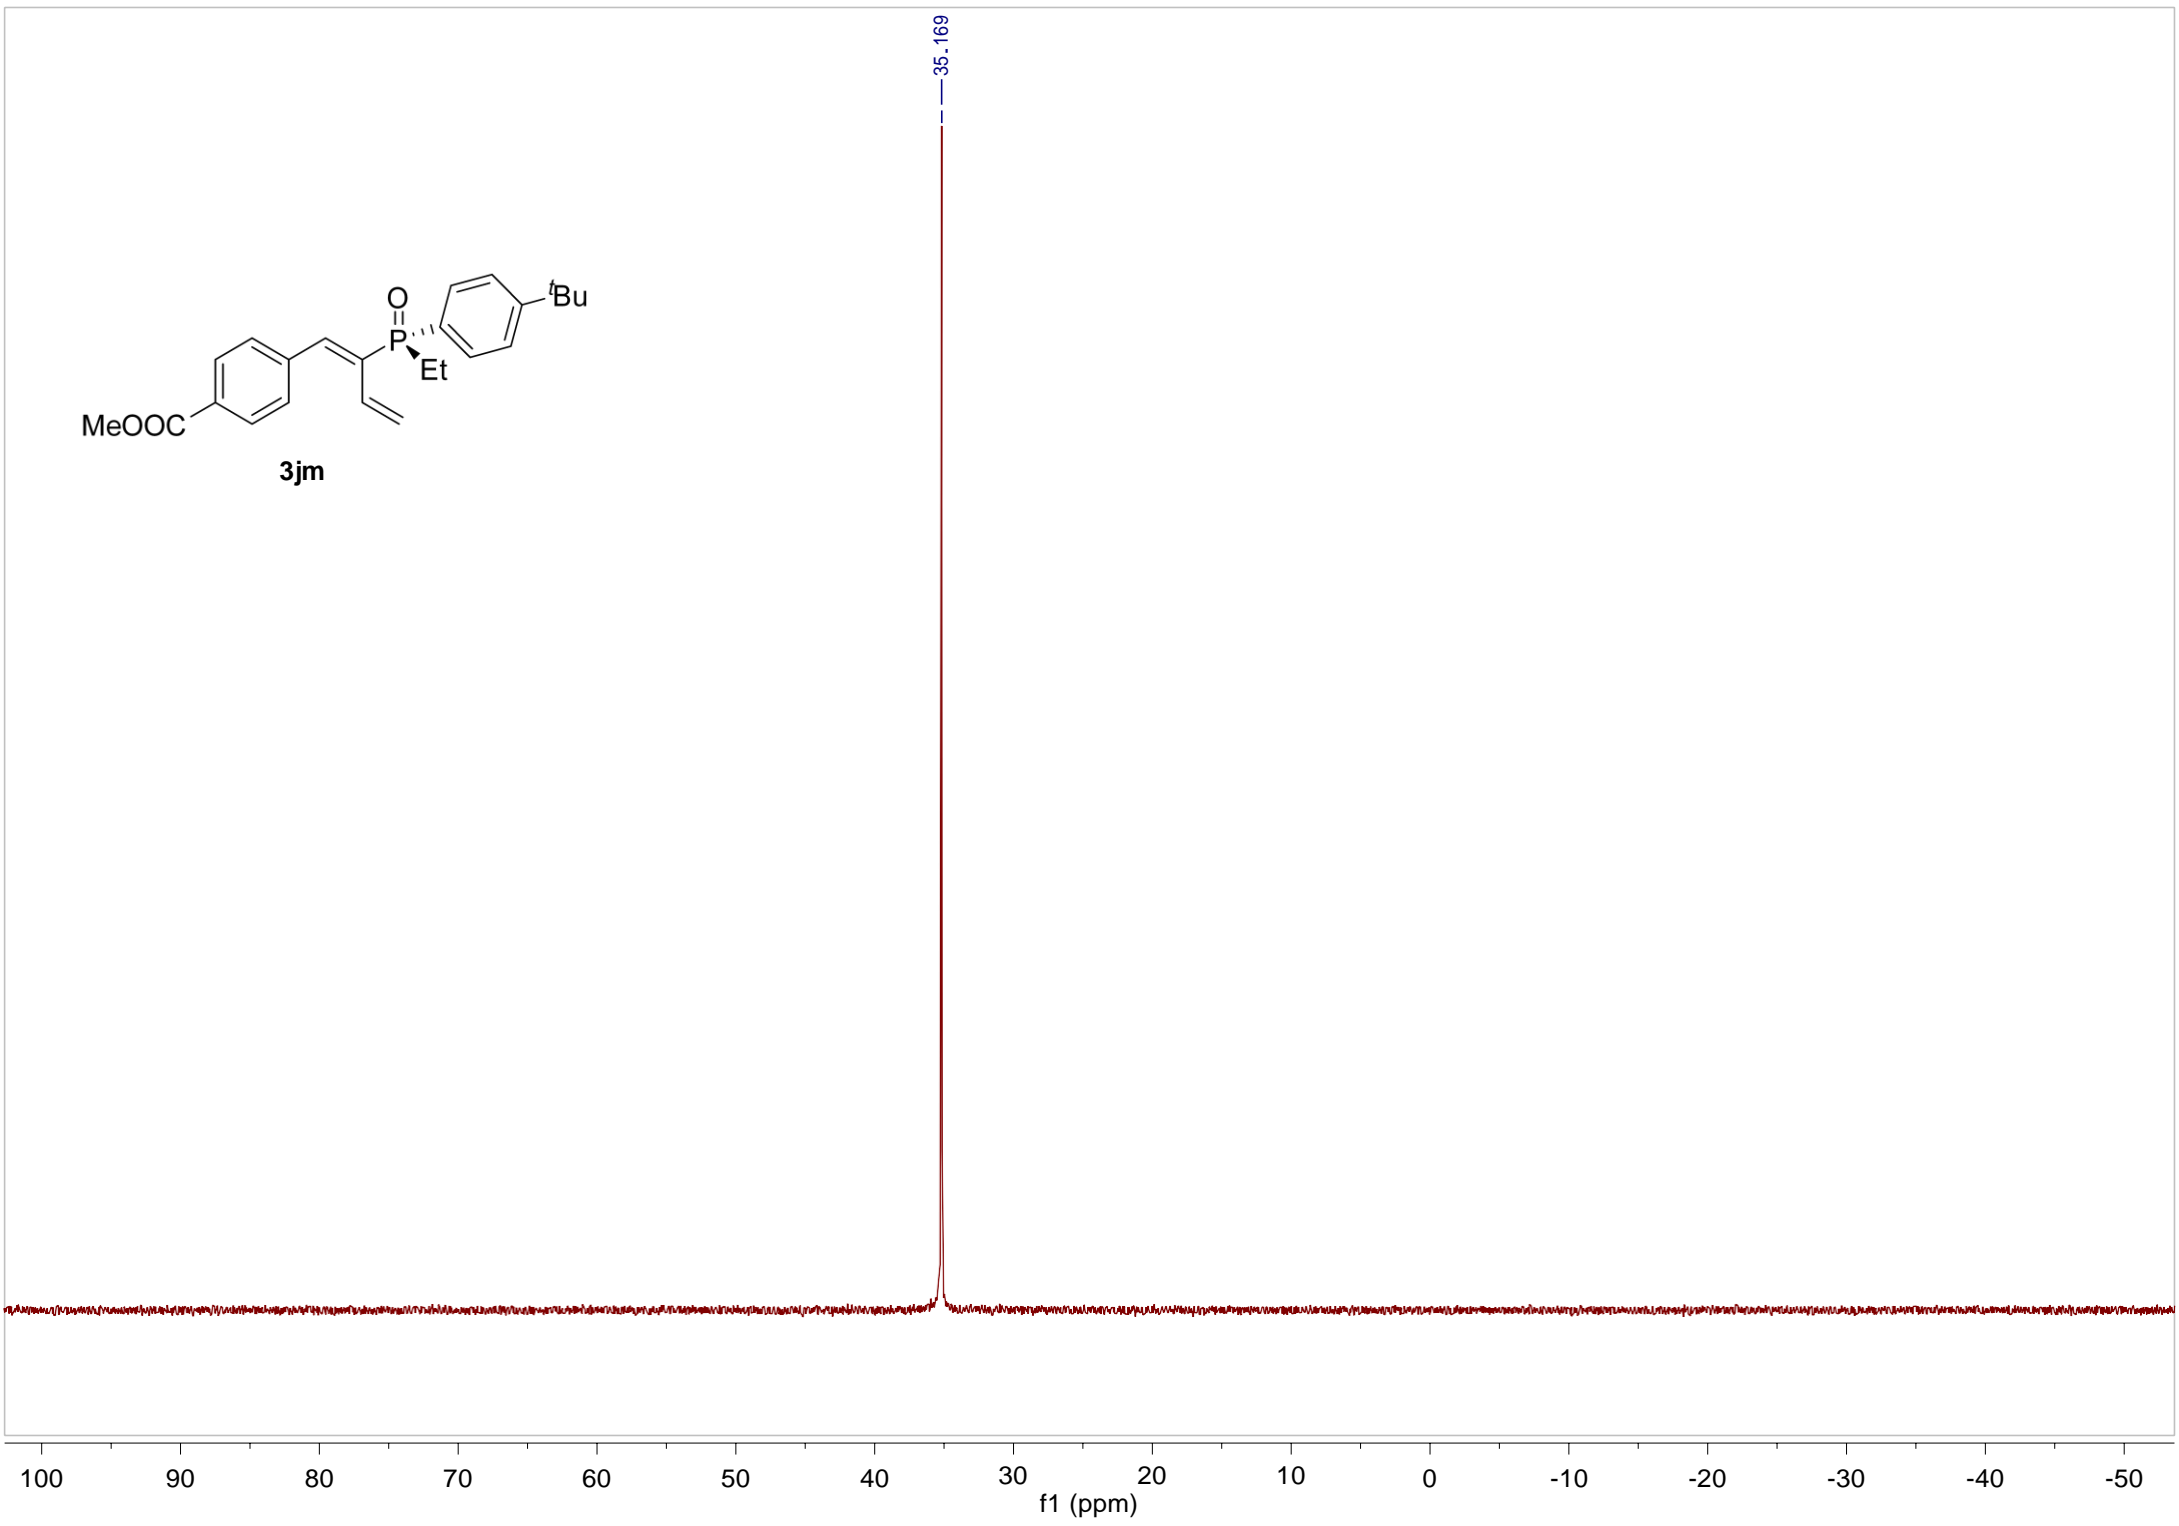

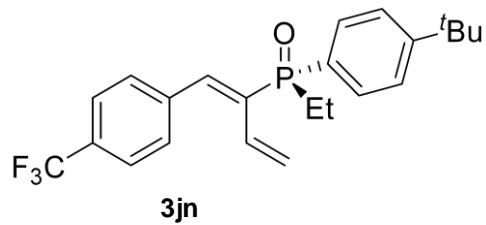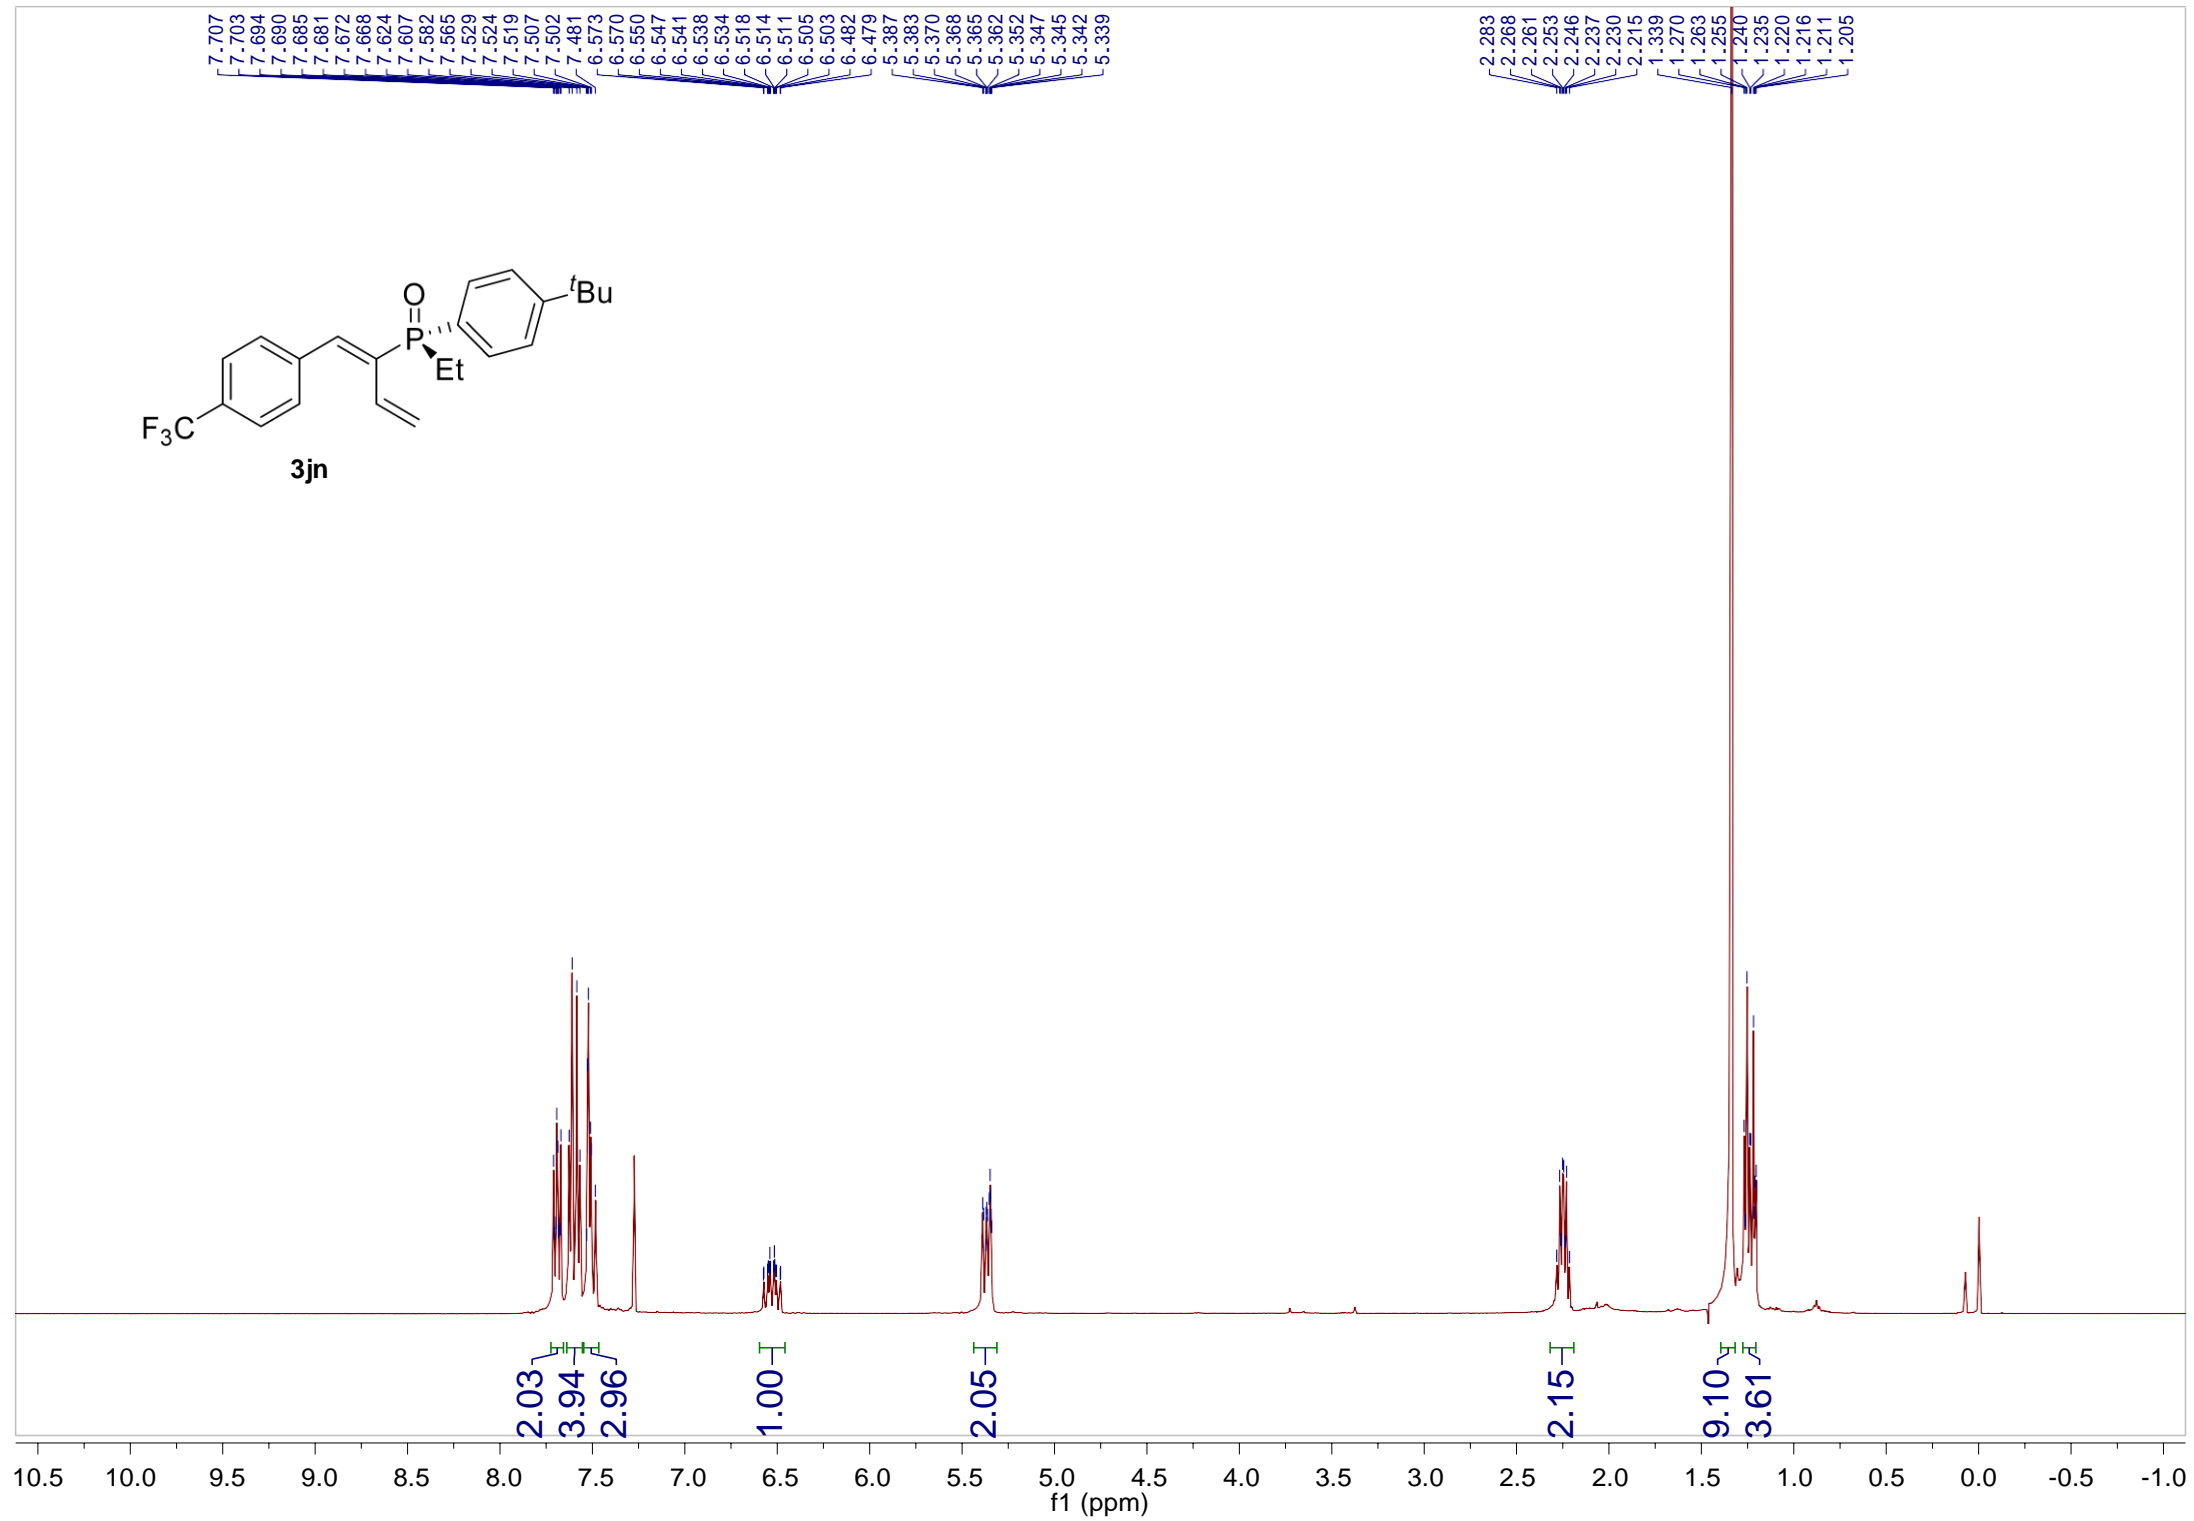

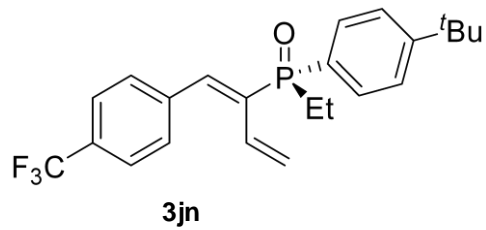

155.395  
155.373  
140.774  
140.713  
139.005  
138.870  
134.934  
134.242  
131.065  
130.995  
130.696  
130.620  
130.399  
130.139  
130.074  
129.369  
128.575  
125.773  
125.679  
125.237  
125.207  
125.177  
125.146  
124.959  
122.795  
121.866  
121.819

34.973

31.059

20.437

19.850

5.400

5.360

190 180 170 160 150 140 130 120 110 100 90 80 70 60 50 40 30 20 10 0 -10

f1 (ppm)

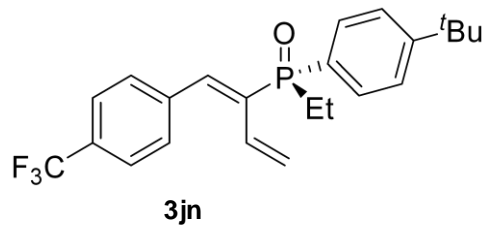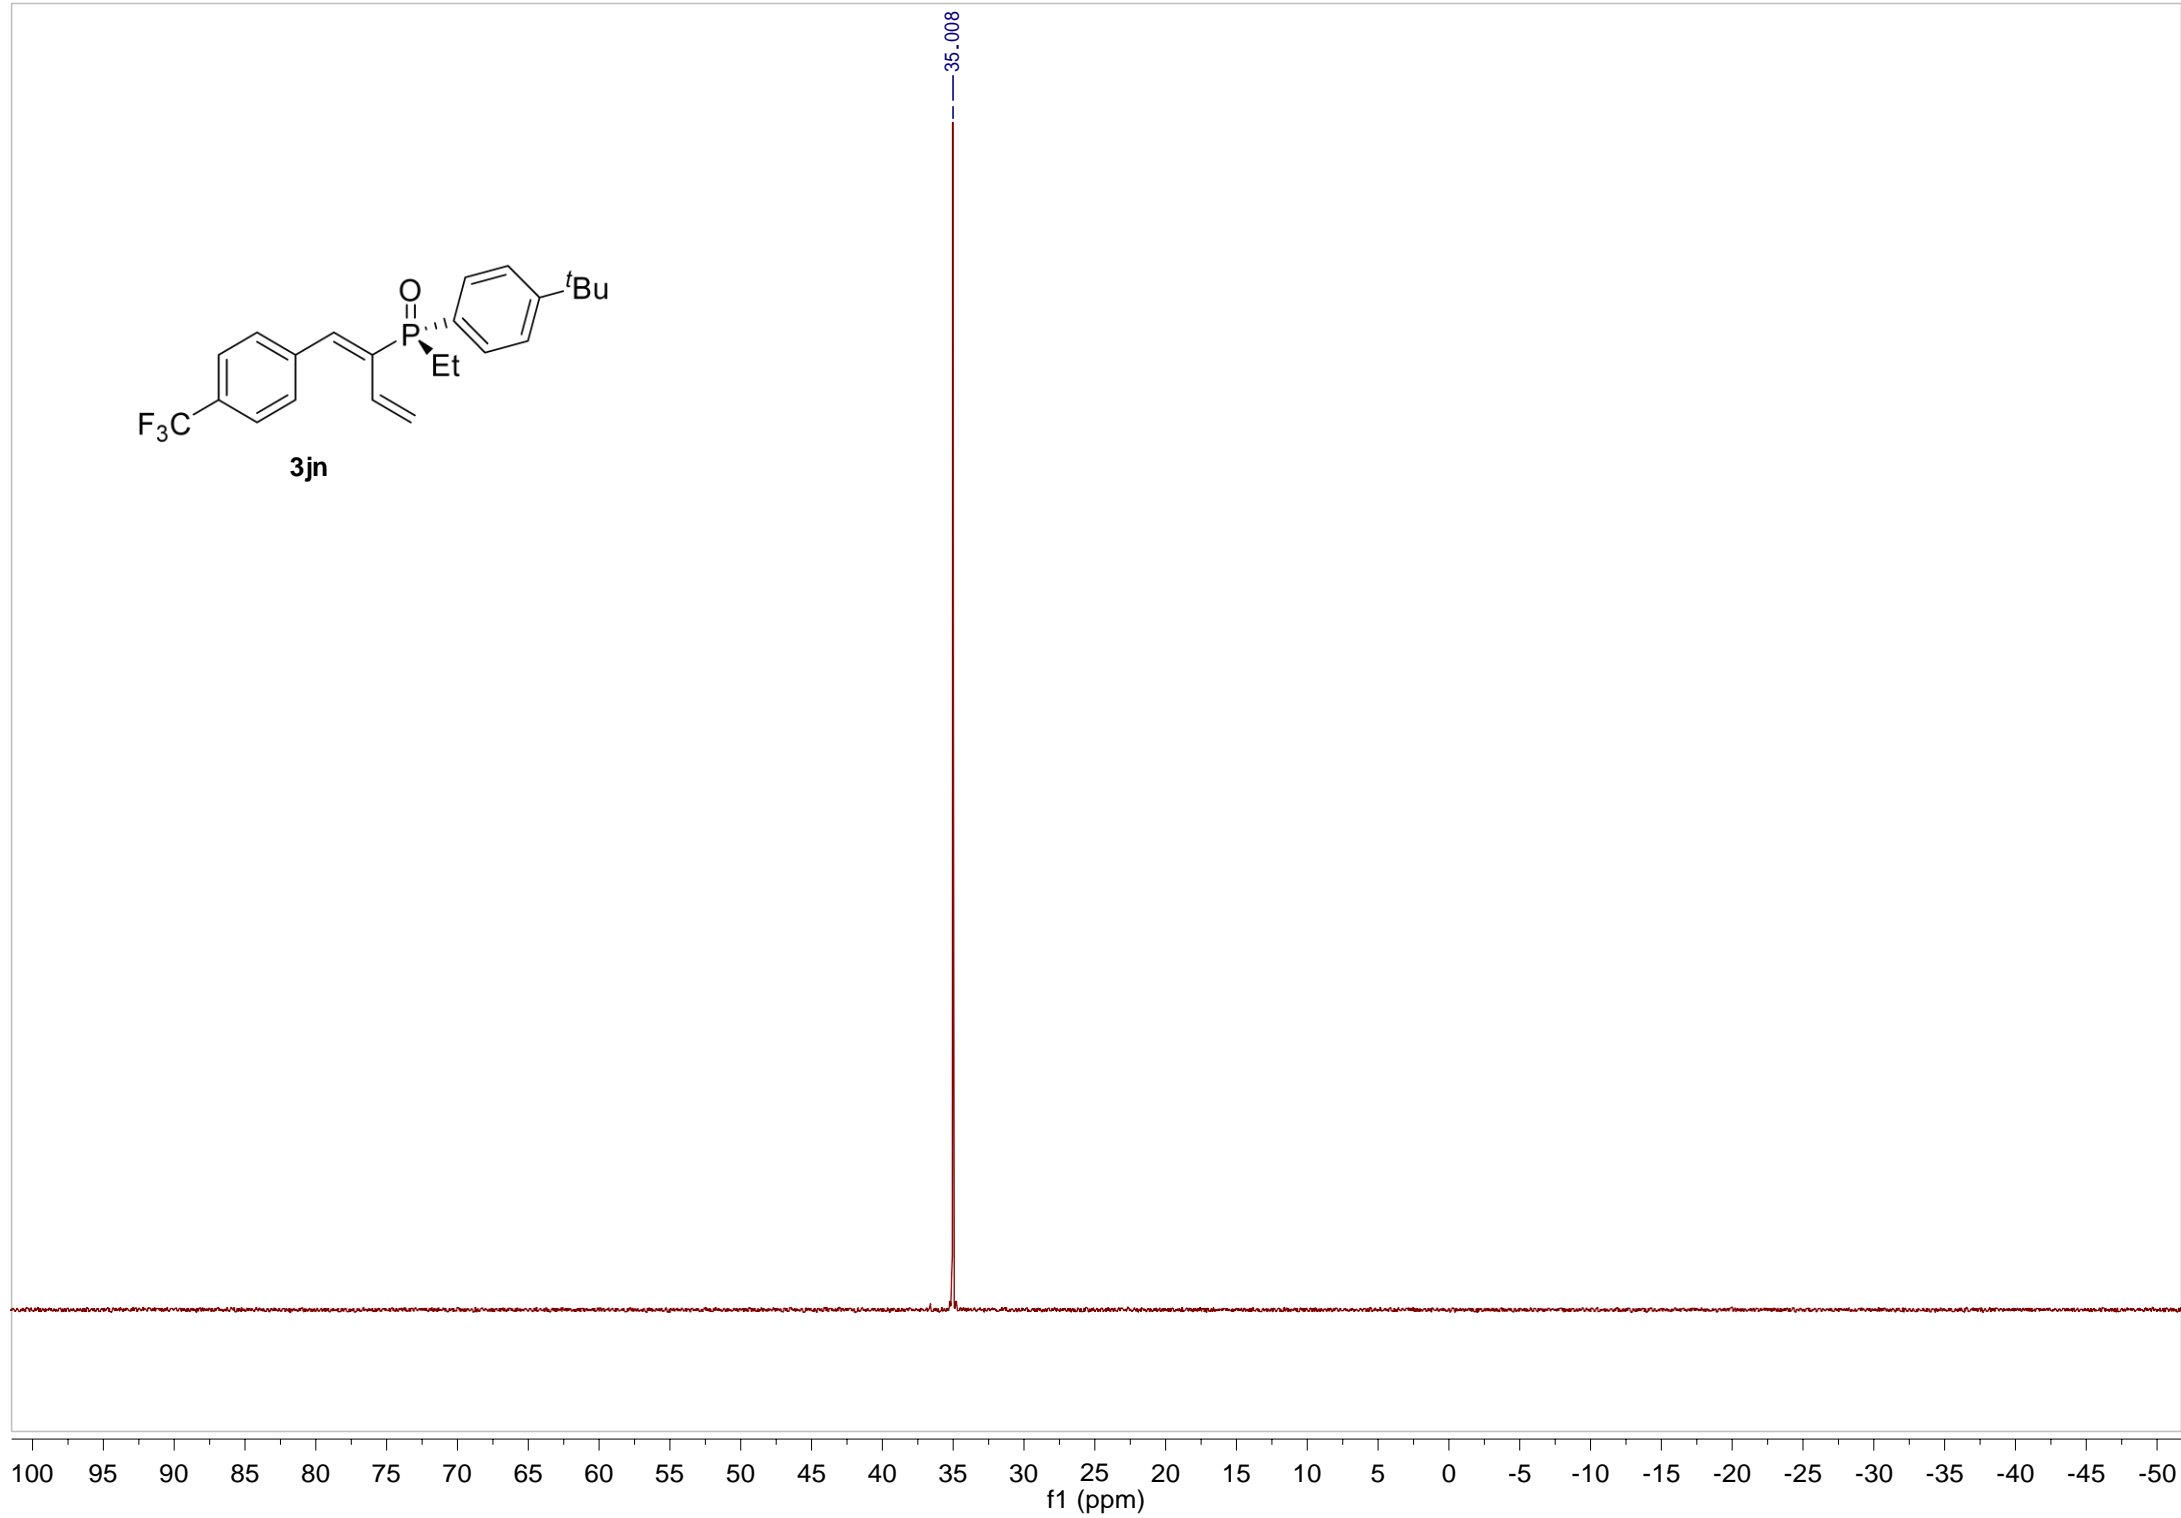

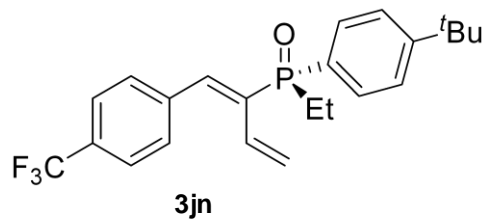

---62.759

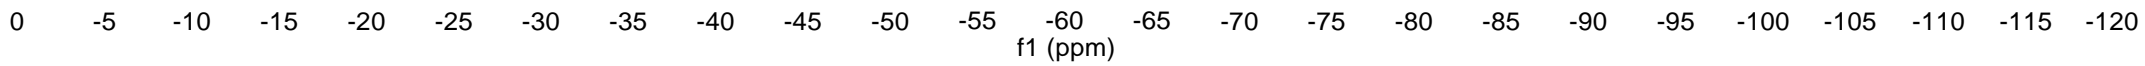



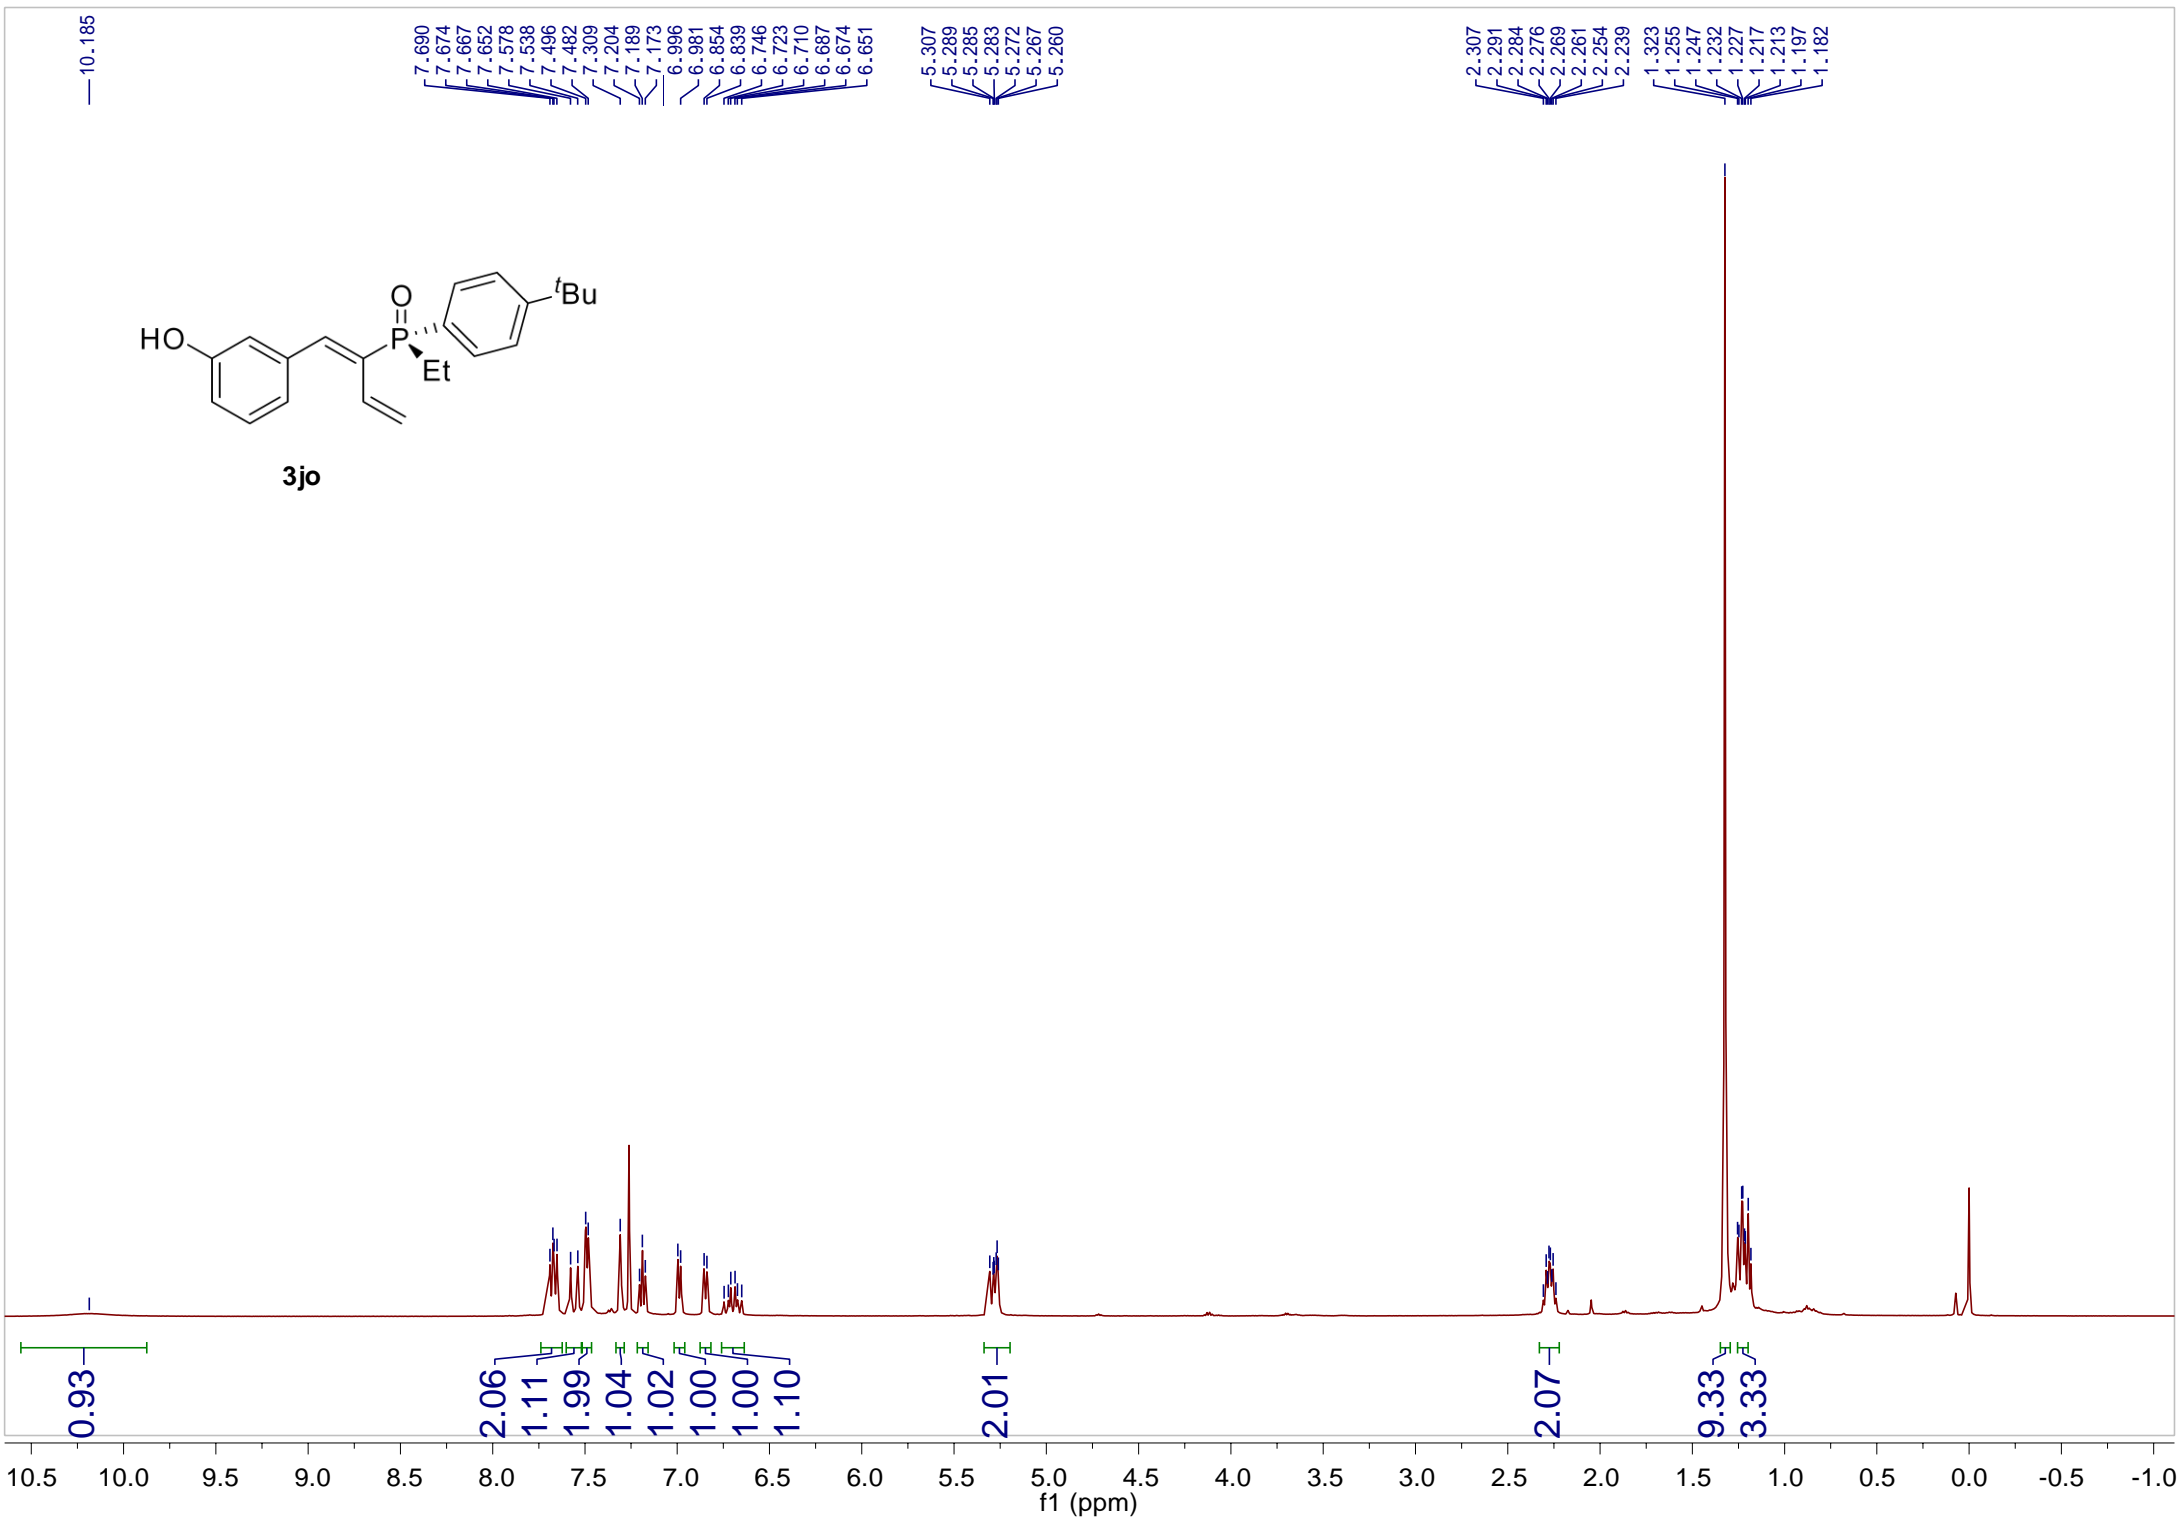

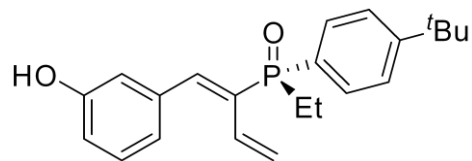

3jo

158.029  
155.444  
155.422  
144.190  
144.134  
136.129  
135.999  
131.825  
131.748  
130.702  
130.624  
130.005  
129.279  
129.190  
129.083  
128.283  
125.818  
125.724  
120.461  
120.417  
120.348  
117.663  
116.897

34.987  
31.070

20.195  
19.609

5.389  
5.349

200 190 180 170 160 150 140 130 120 110 100 90 80 70 60 50 40 30 20 10 0 -10

f1 (ppm)

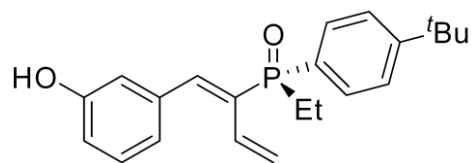

3jo

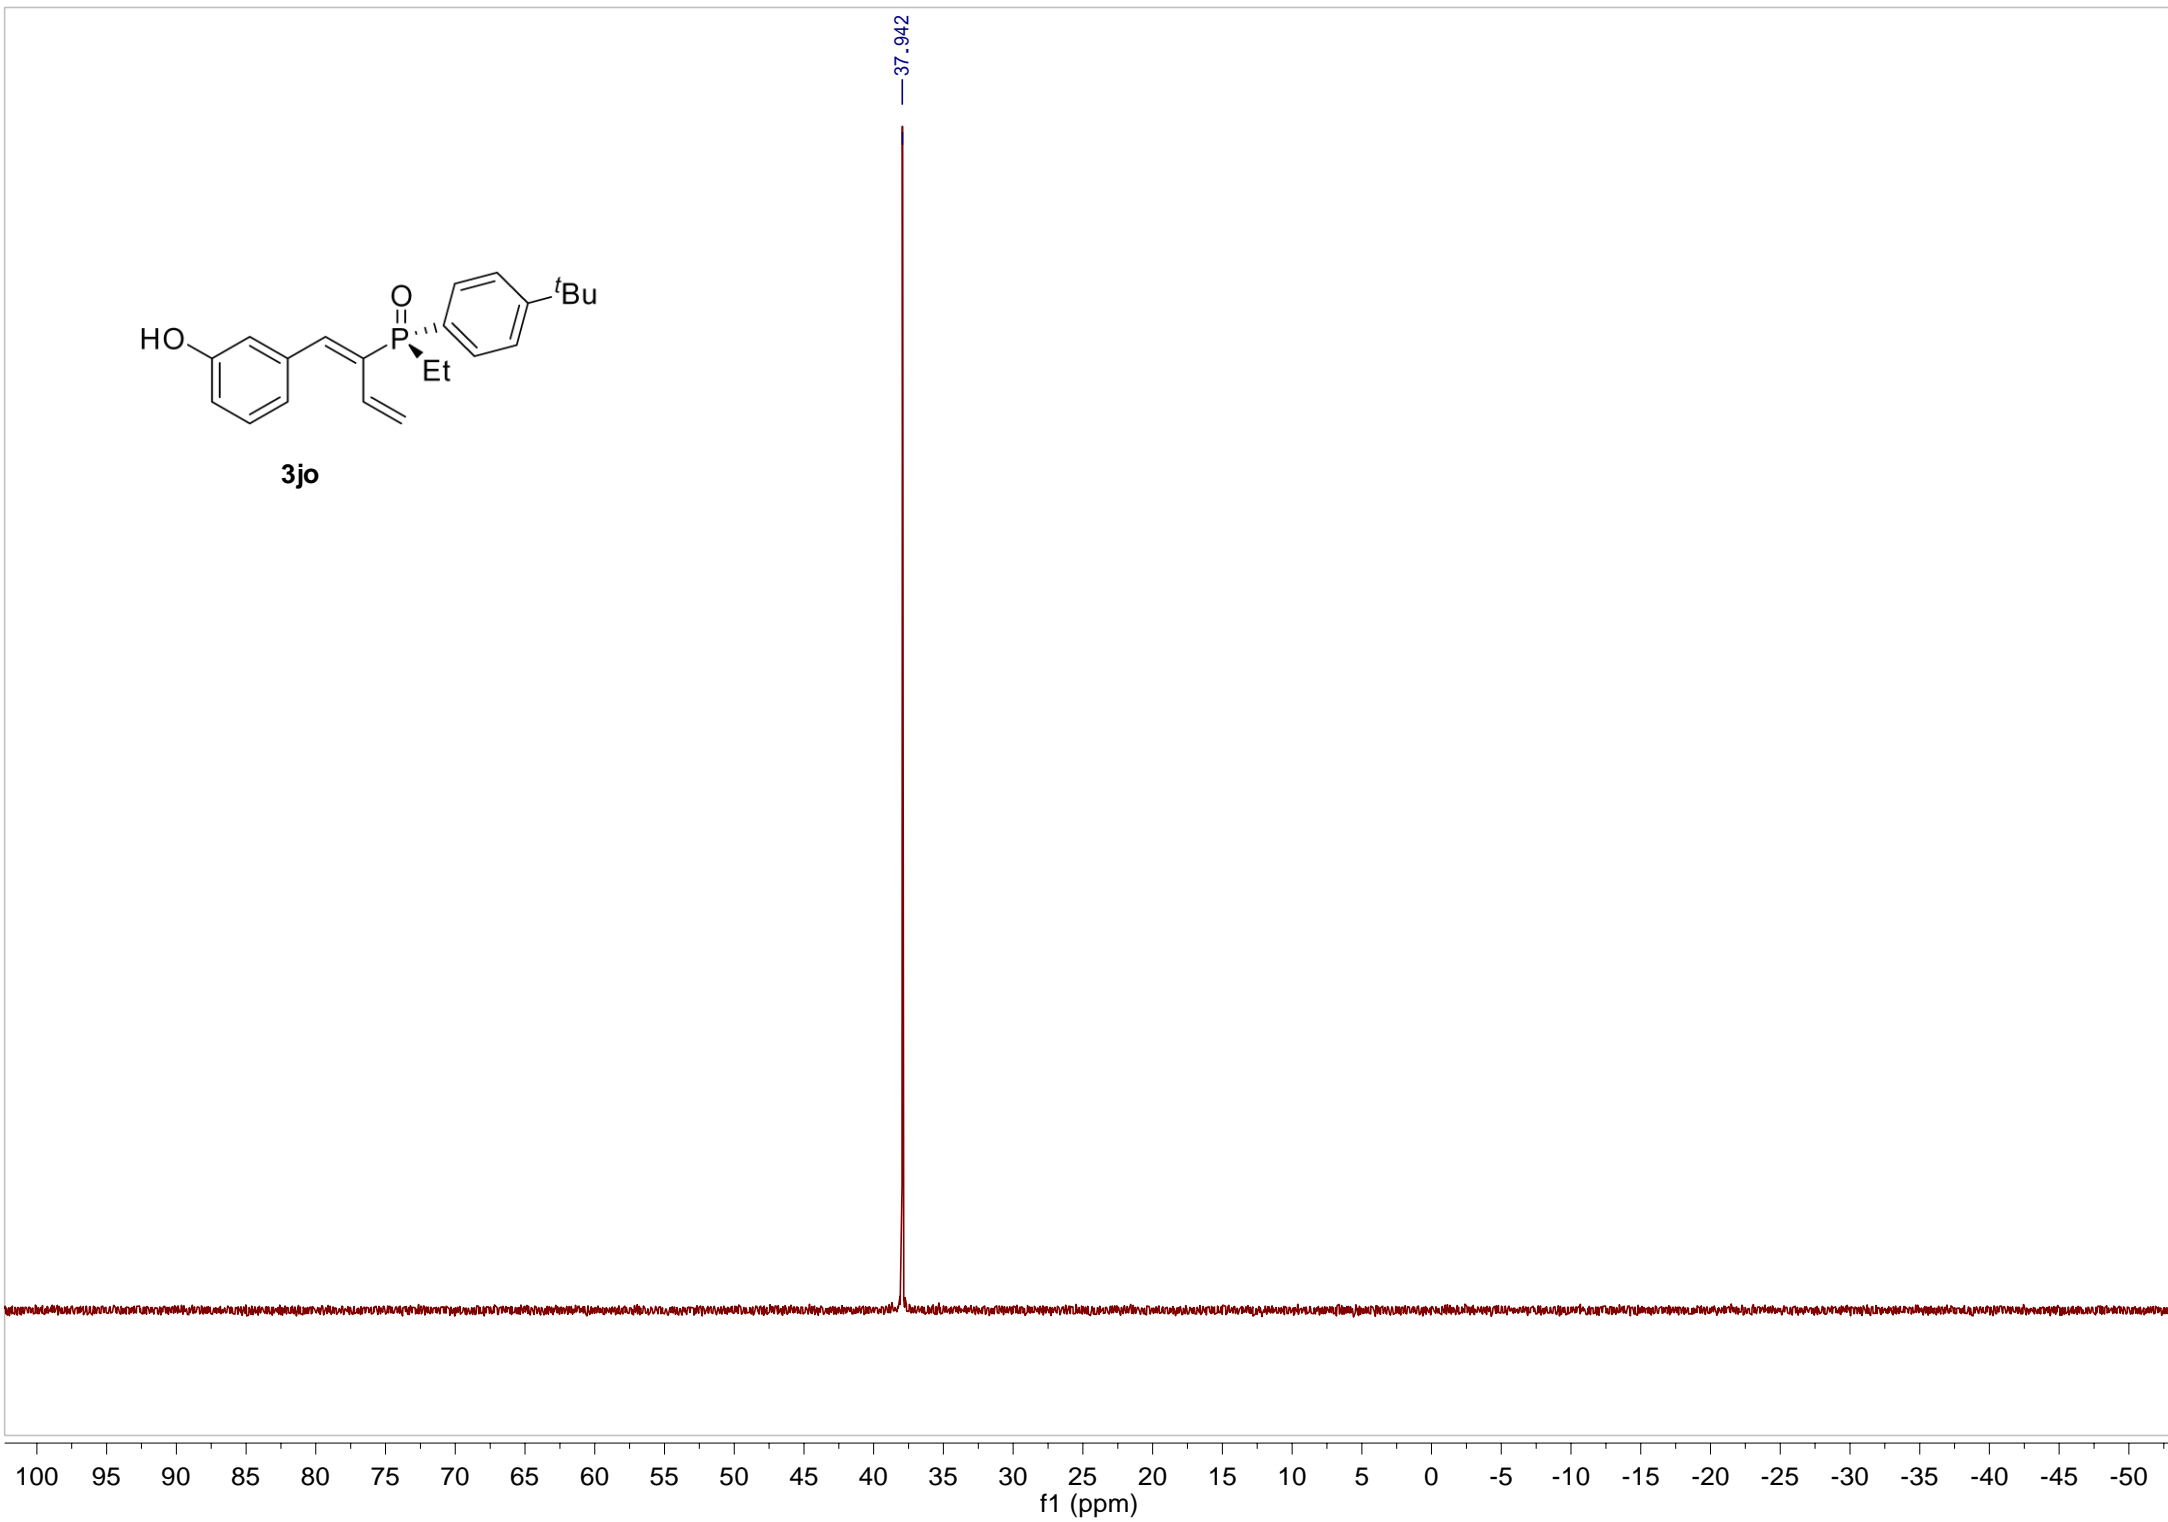

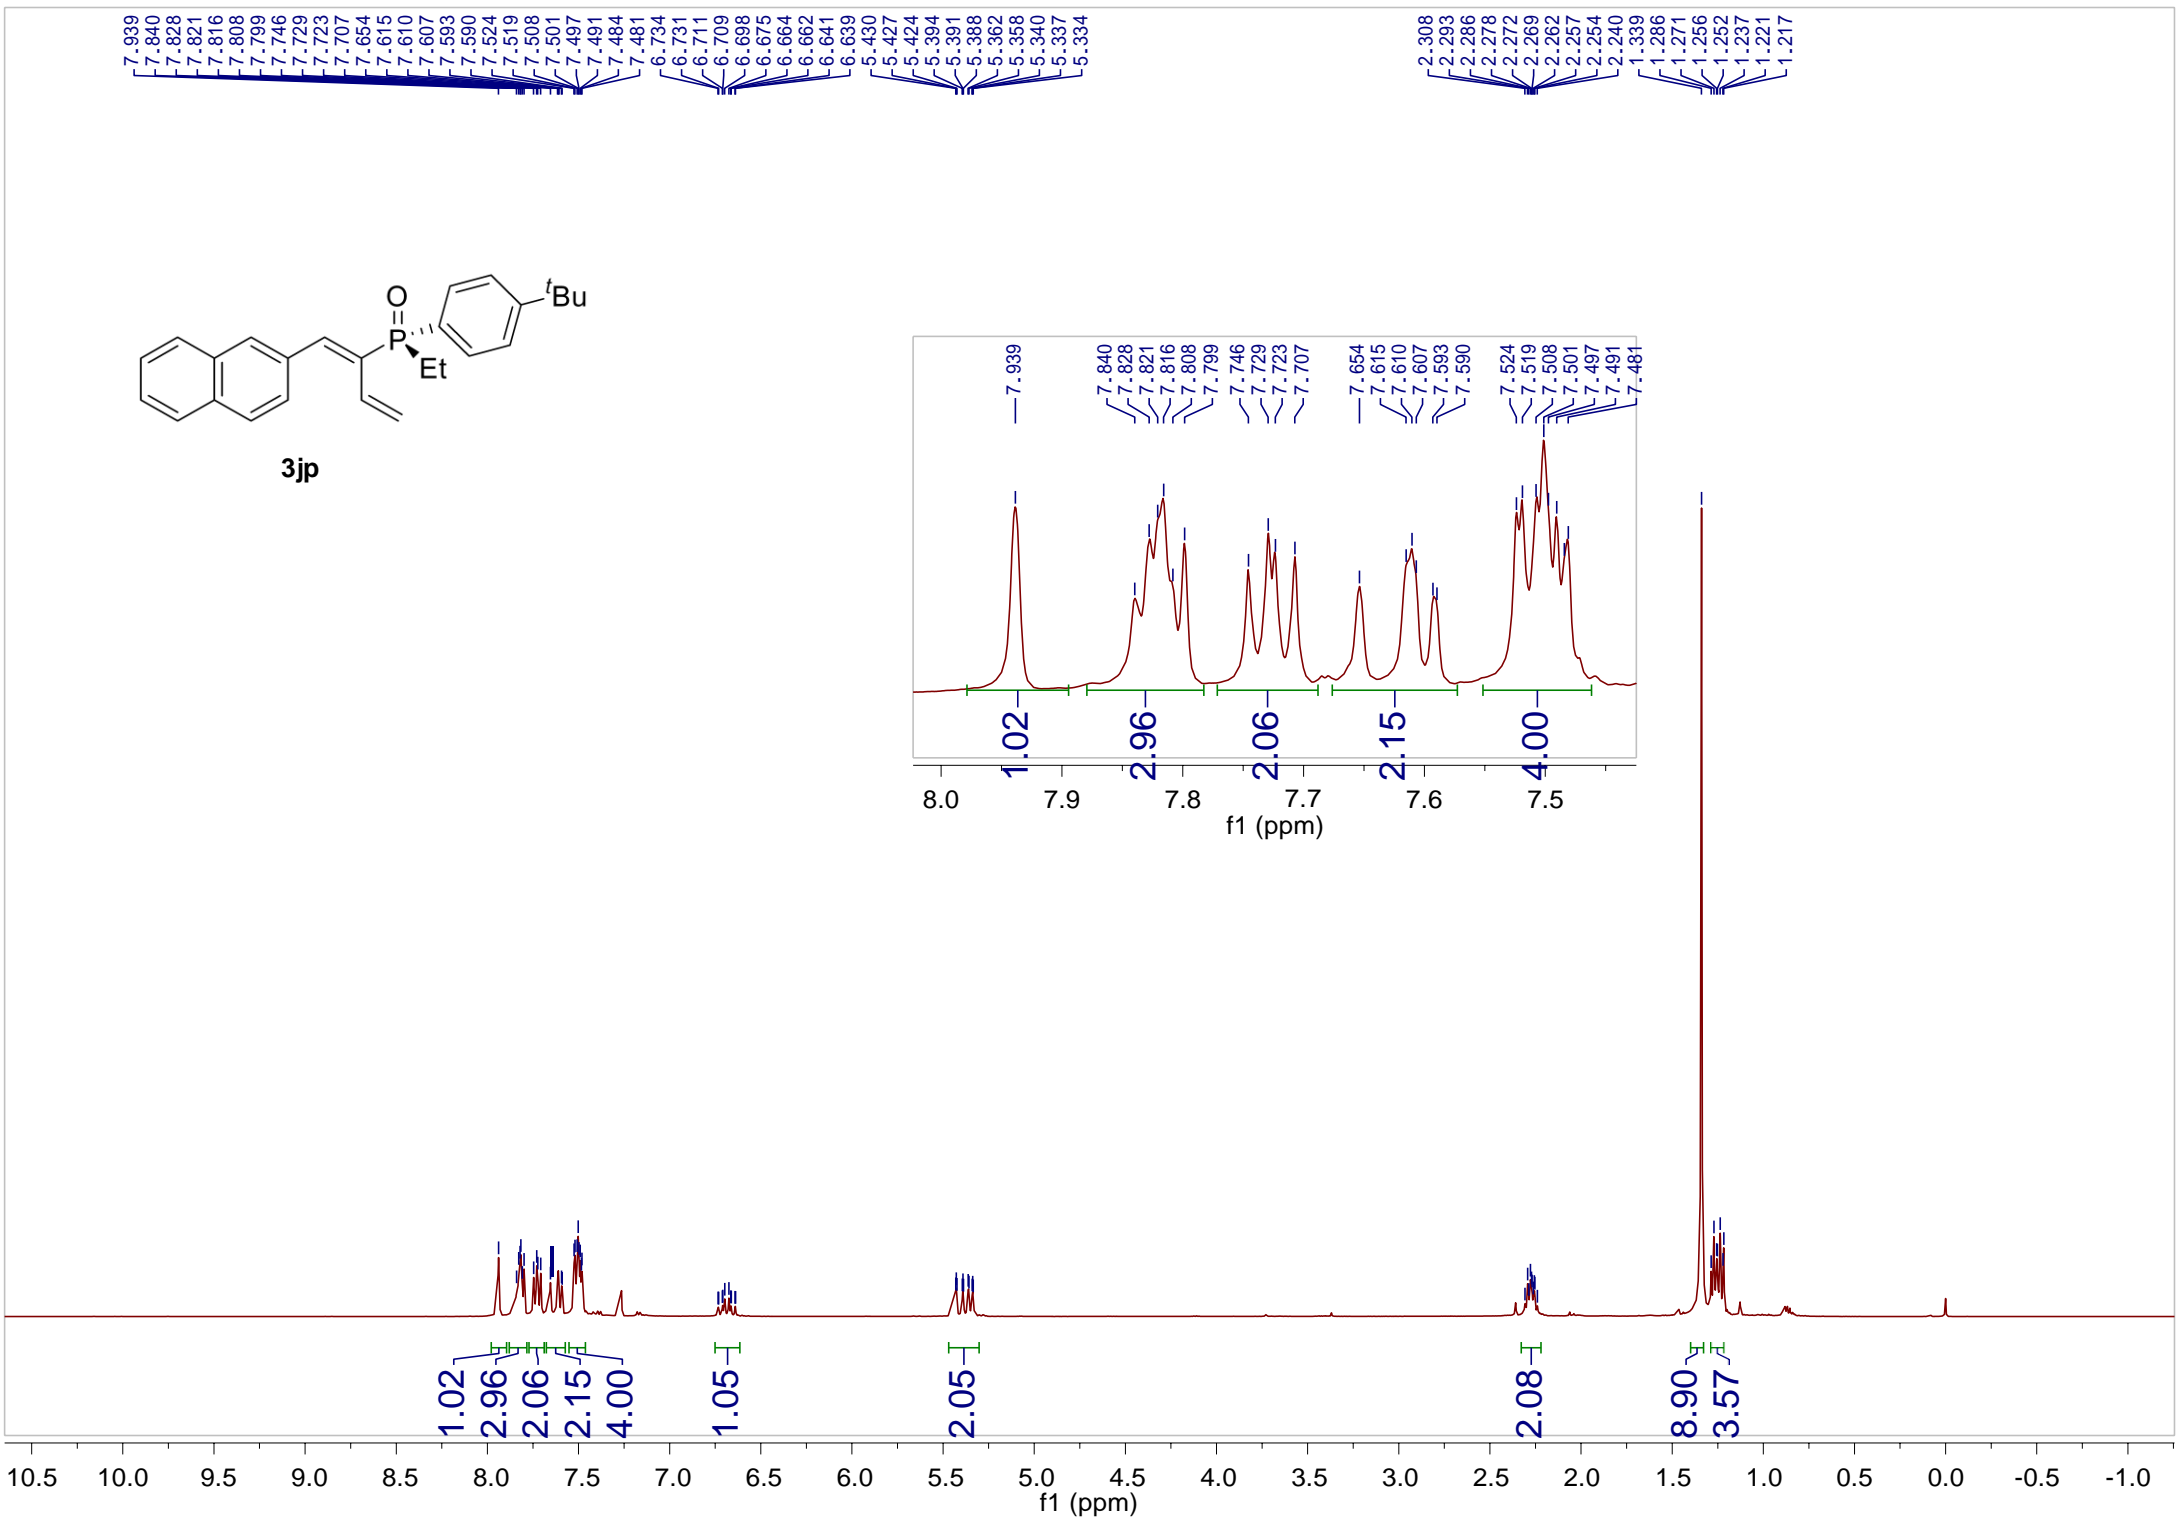

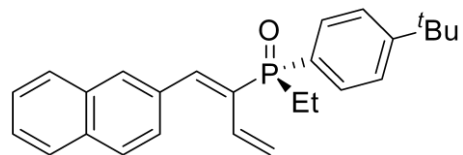

3jp

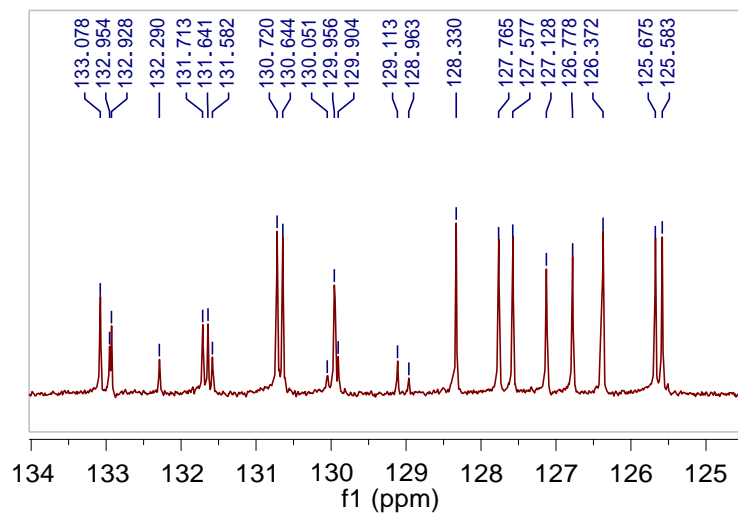

155.115  
155.094

142.614  
142.552  
133.078  
132.954  
132.928  
132.290  
131.713  
131.641  
131.582  
130.720  
130.644  
130.051  
129.956  
129.904  
129.113  
128.963  
128.330  
127.765  
127.577  
127.128  
126.778  
126.372  
125.675  
125.583  
120.980  
120.934

34.928  
31.066

20.558  
19.972

5.486  
5.447

210 200 190 180 170 160 150 140 130 120 110 100 90 80 70 60 50 40 30 20 10 0 -10

f1 (ppm)

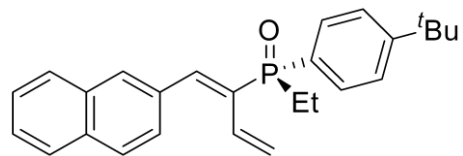

3jp

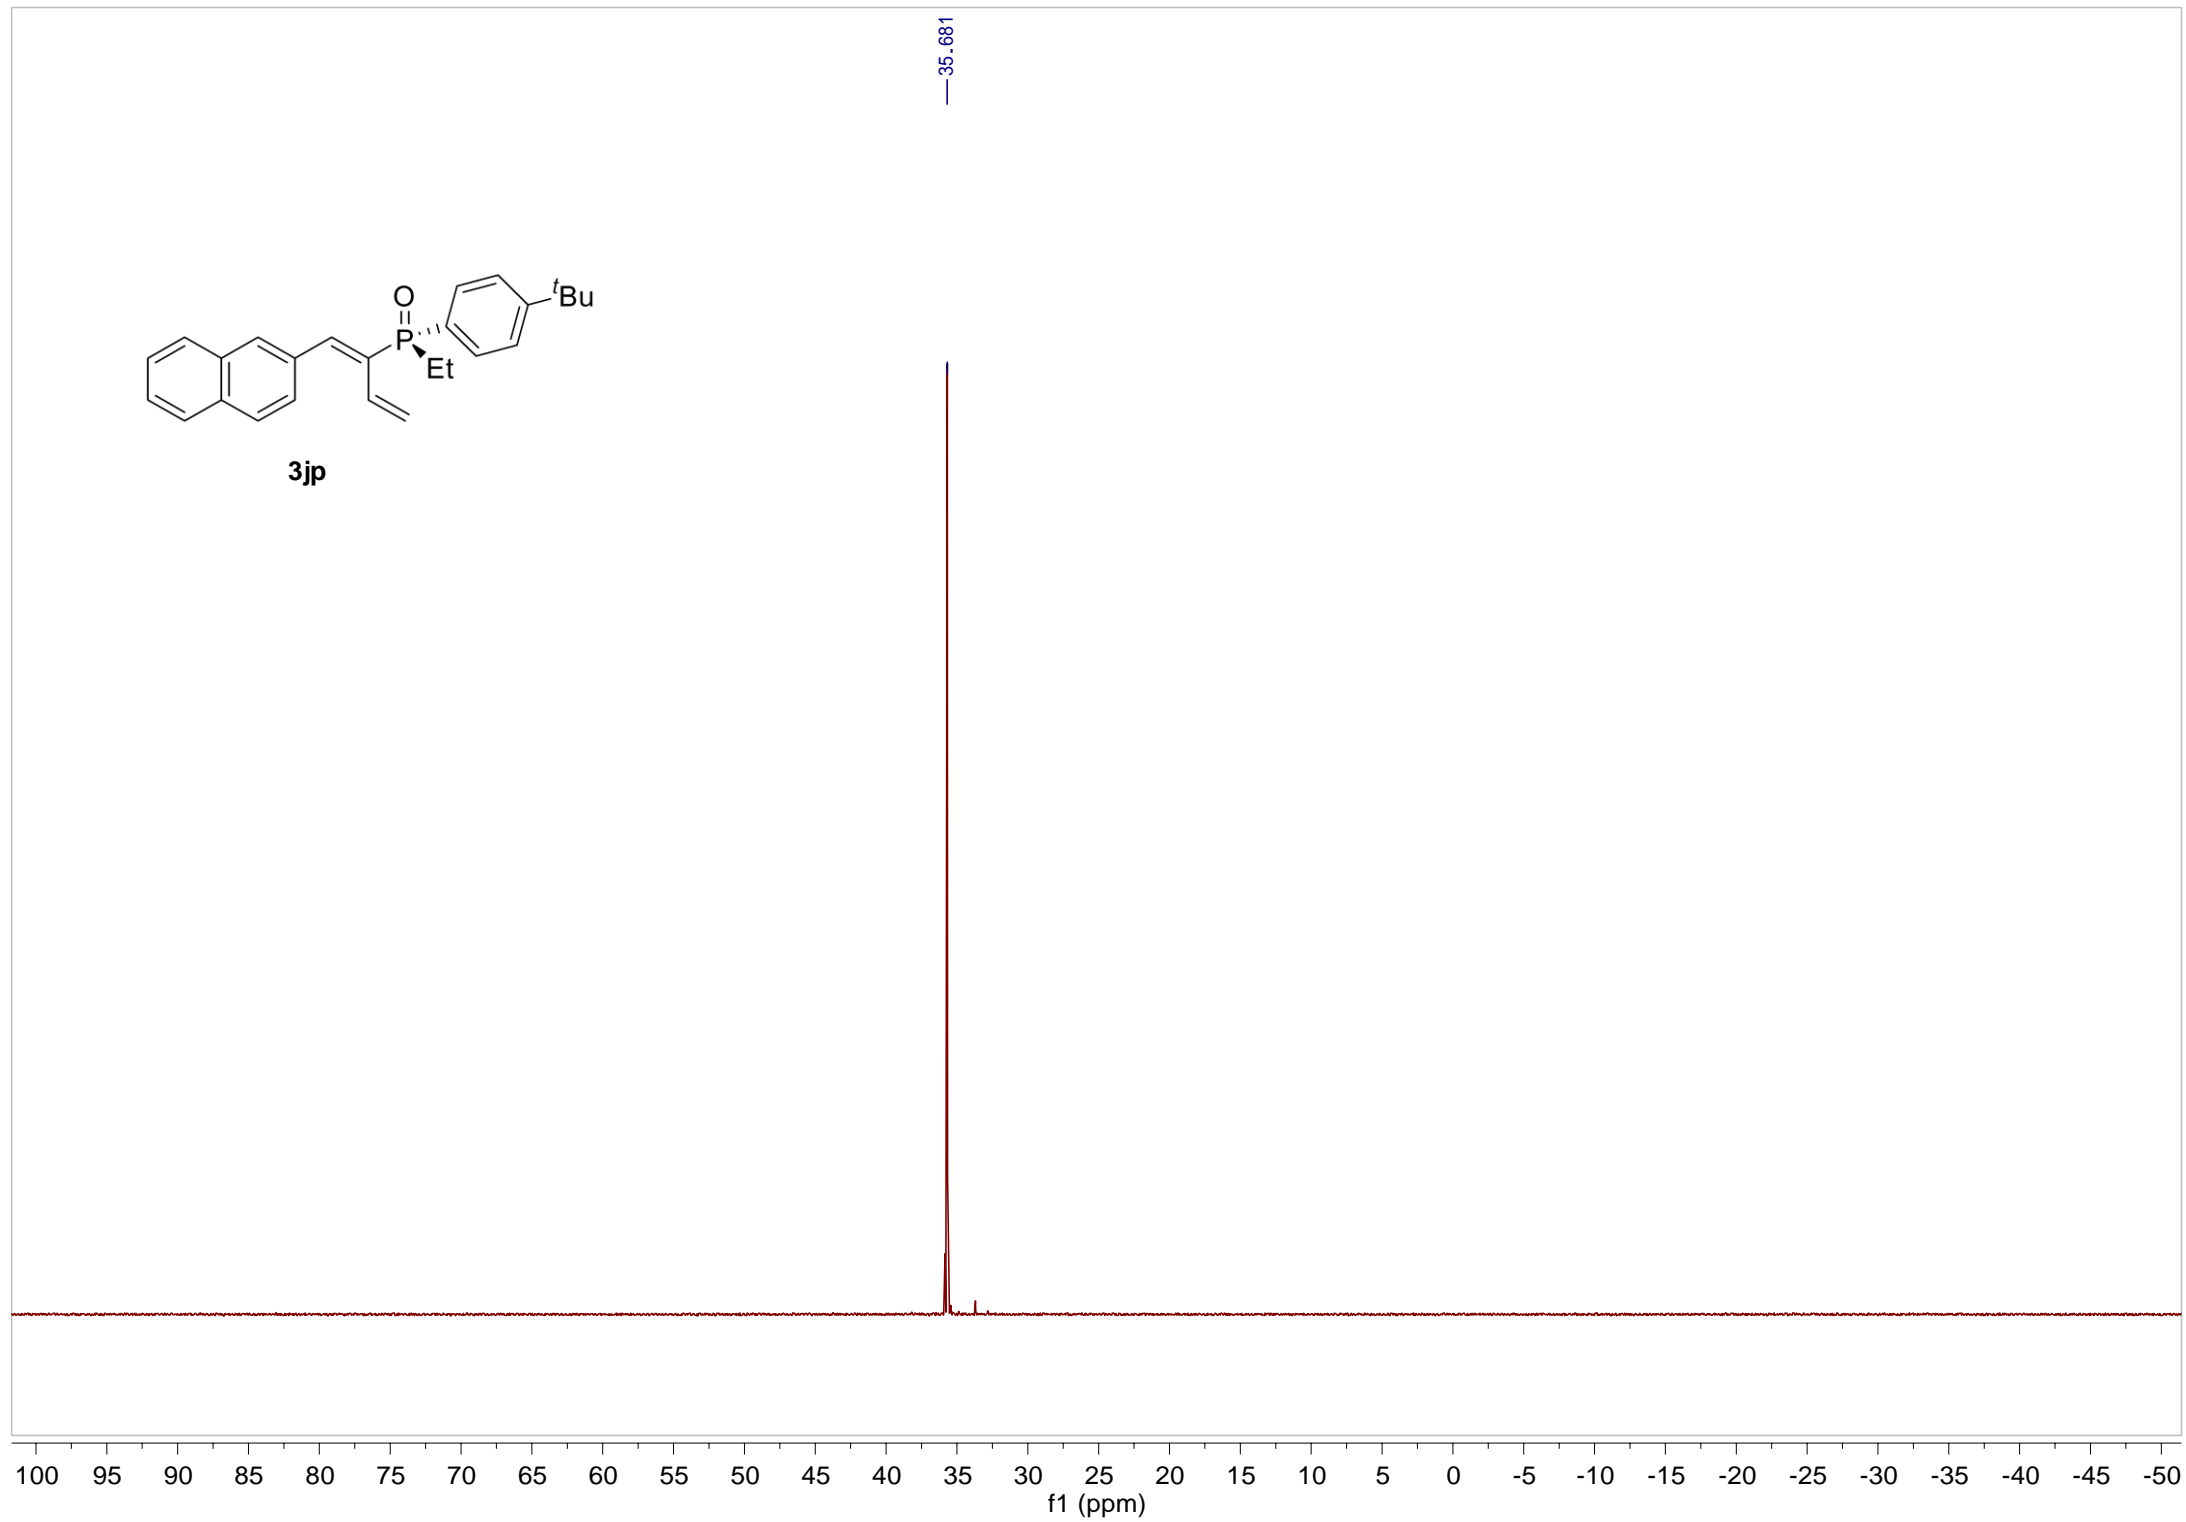



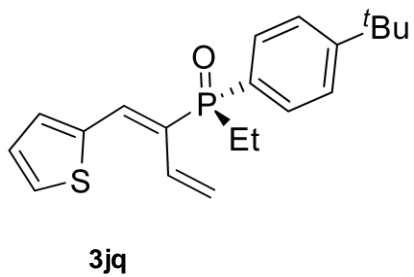

155.121  
155.098  
138.962  
138.814  
134.745  
134.676  
132.202  
131.478  
131.407  
130.686  
130.610  
129.944  
129.284  
129.147  
128.669  
127.944  
127.141  
125.636  
125.544  
122.115  
122.066

34.949  
31.089

20.368  
19.776

5.395  
5.355

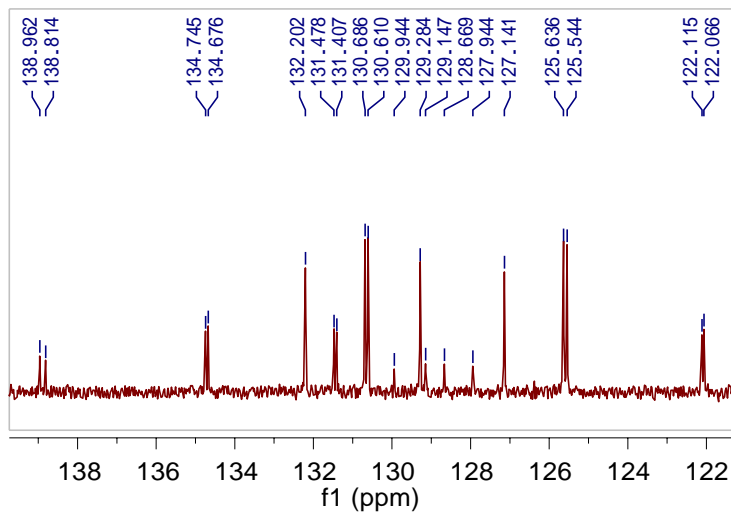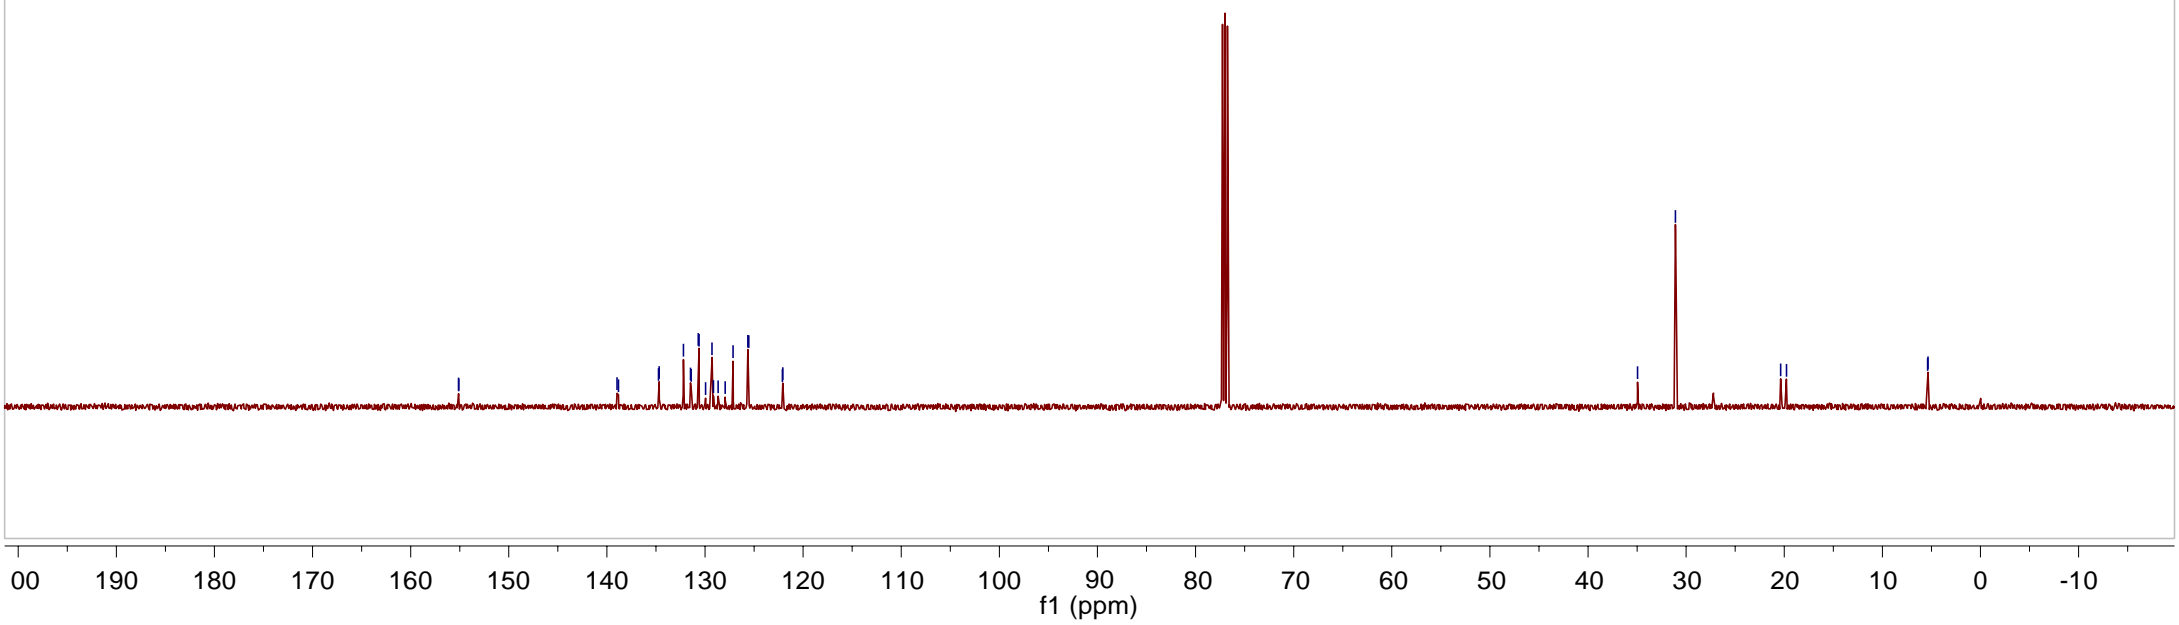



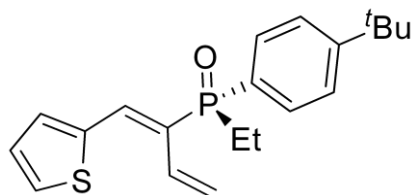

3jq

— 34.934

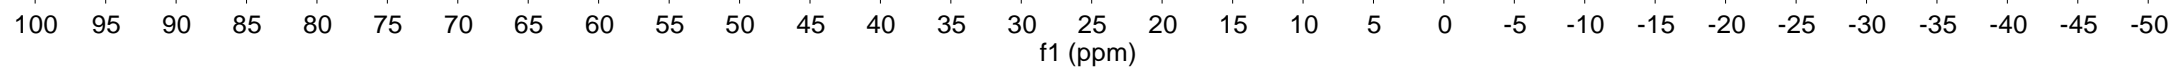

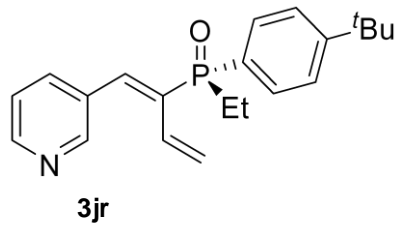

8.641  
8.637  
8.467  
8.464  
8.458  
8.454  
7.737  
7.726  
7.721  
7.632  
7.615  
7.609  
7.594  
7.450  
7.444  
7.433  
7.428  
7.396  
7.358  
7.241  
7.231  
7.215  
6.508  
6.485  
6.478  
6.474  
6.470  
6.454  
6.448  
6.440  
6.418

5.315  
5.310  
5.282

2.209  
2.194  
2.186  
2.178  
2.171  
2.163  
2.156  
2.141

1.262  
1.195  
1.180  
1.164  
1.160  
1.145  
1.130

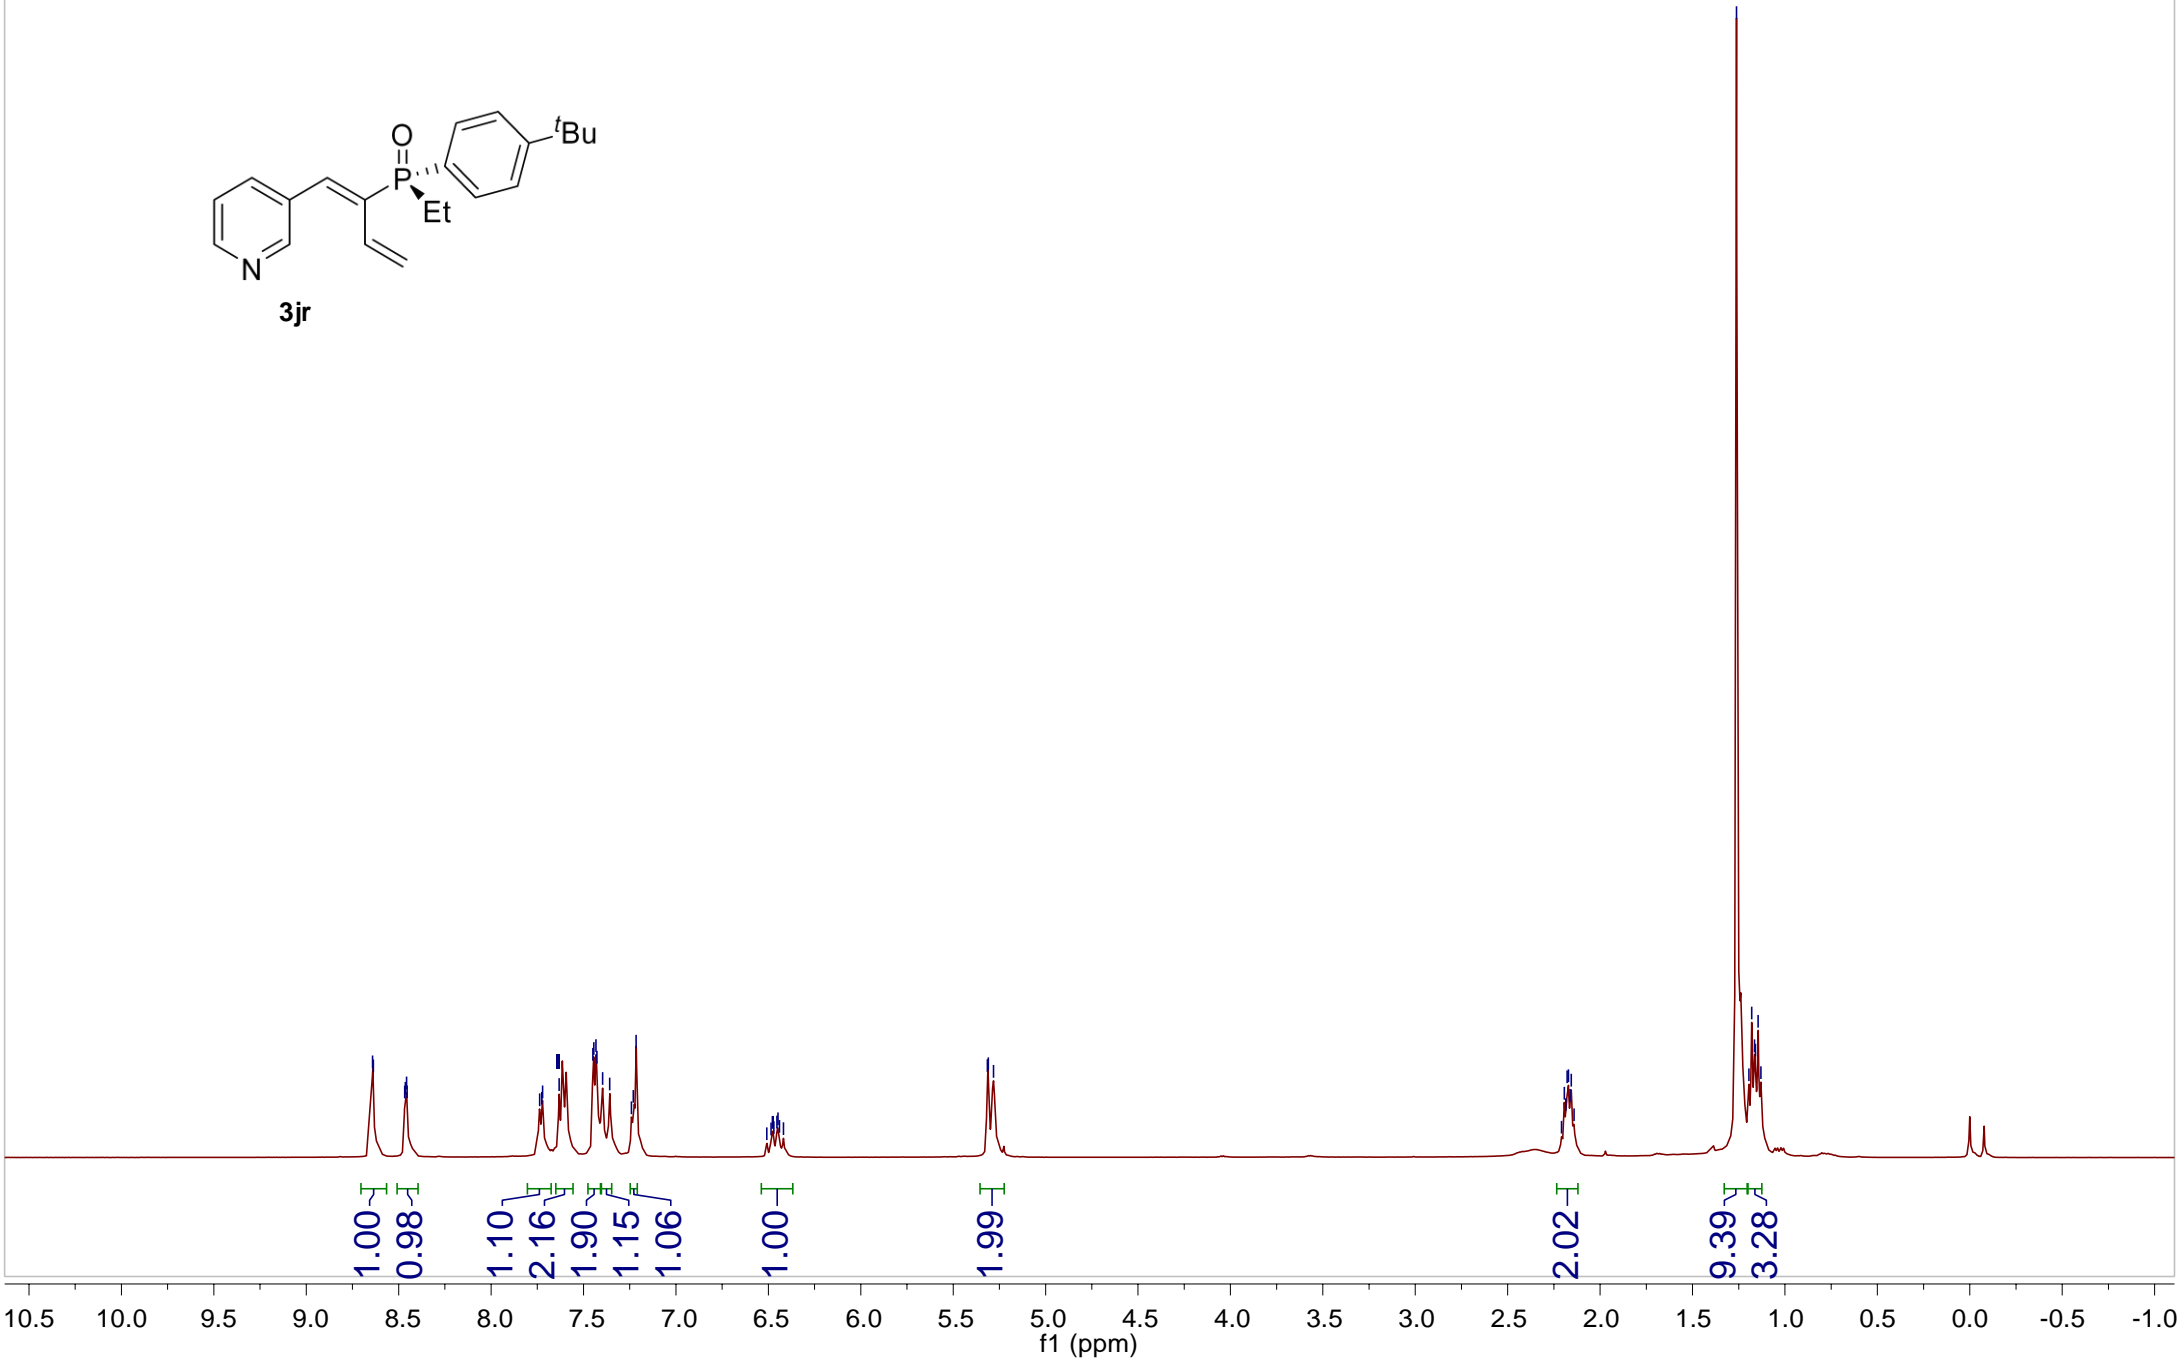

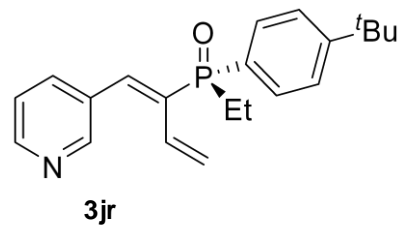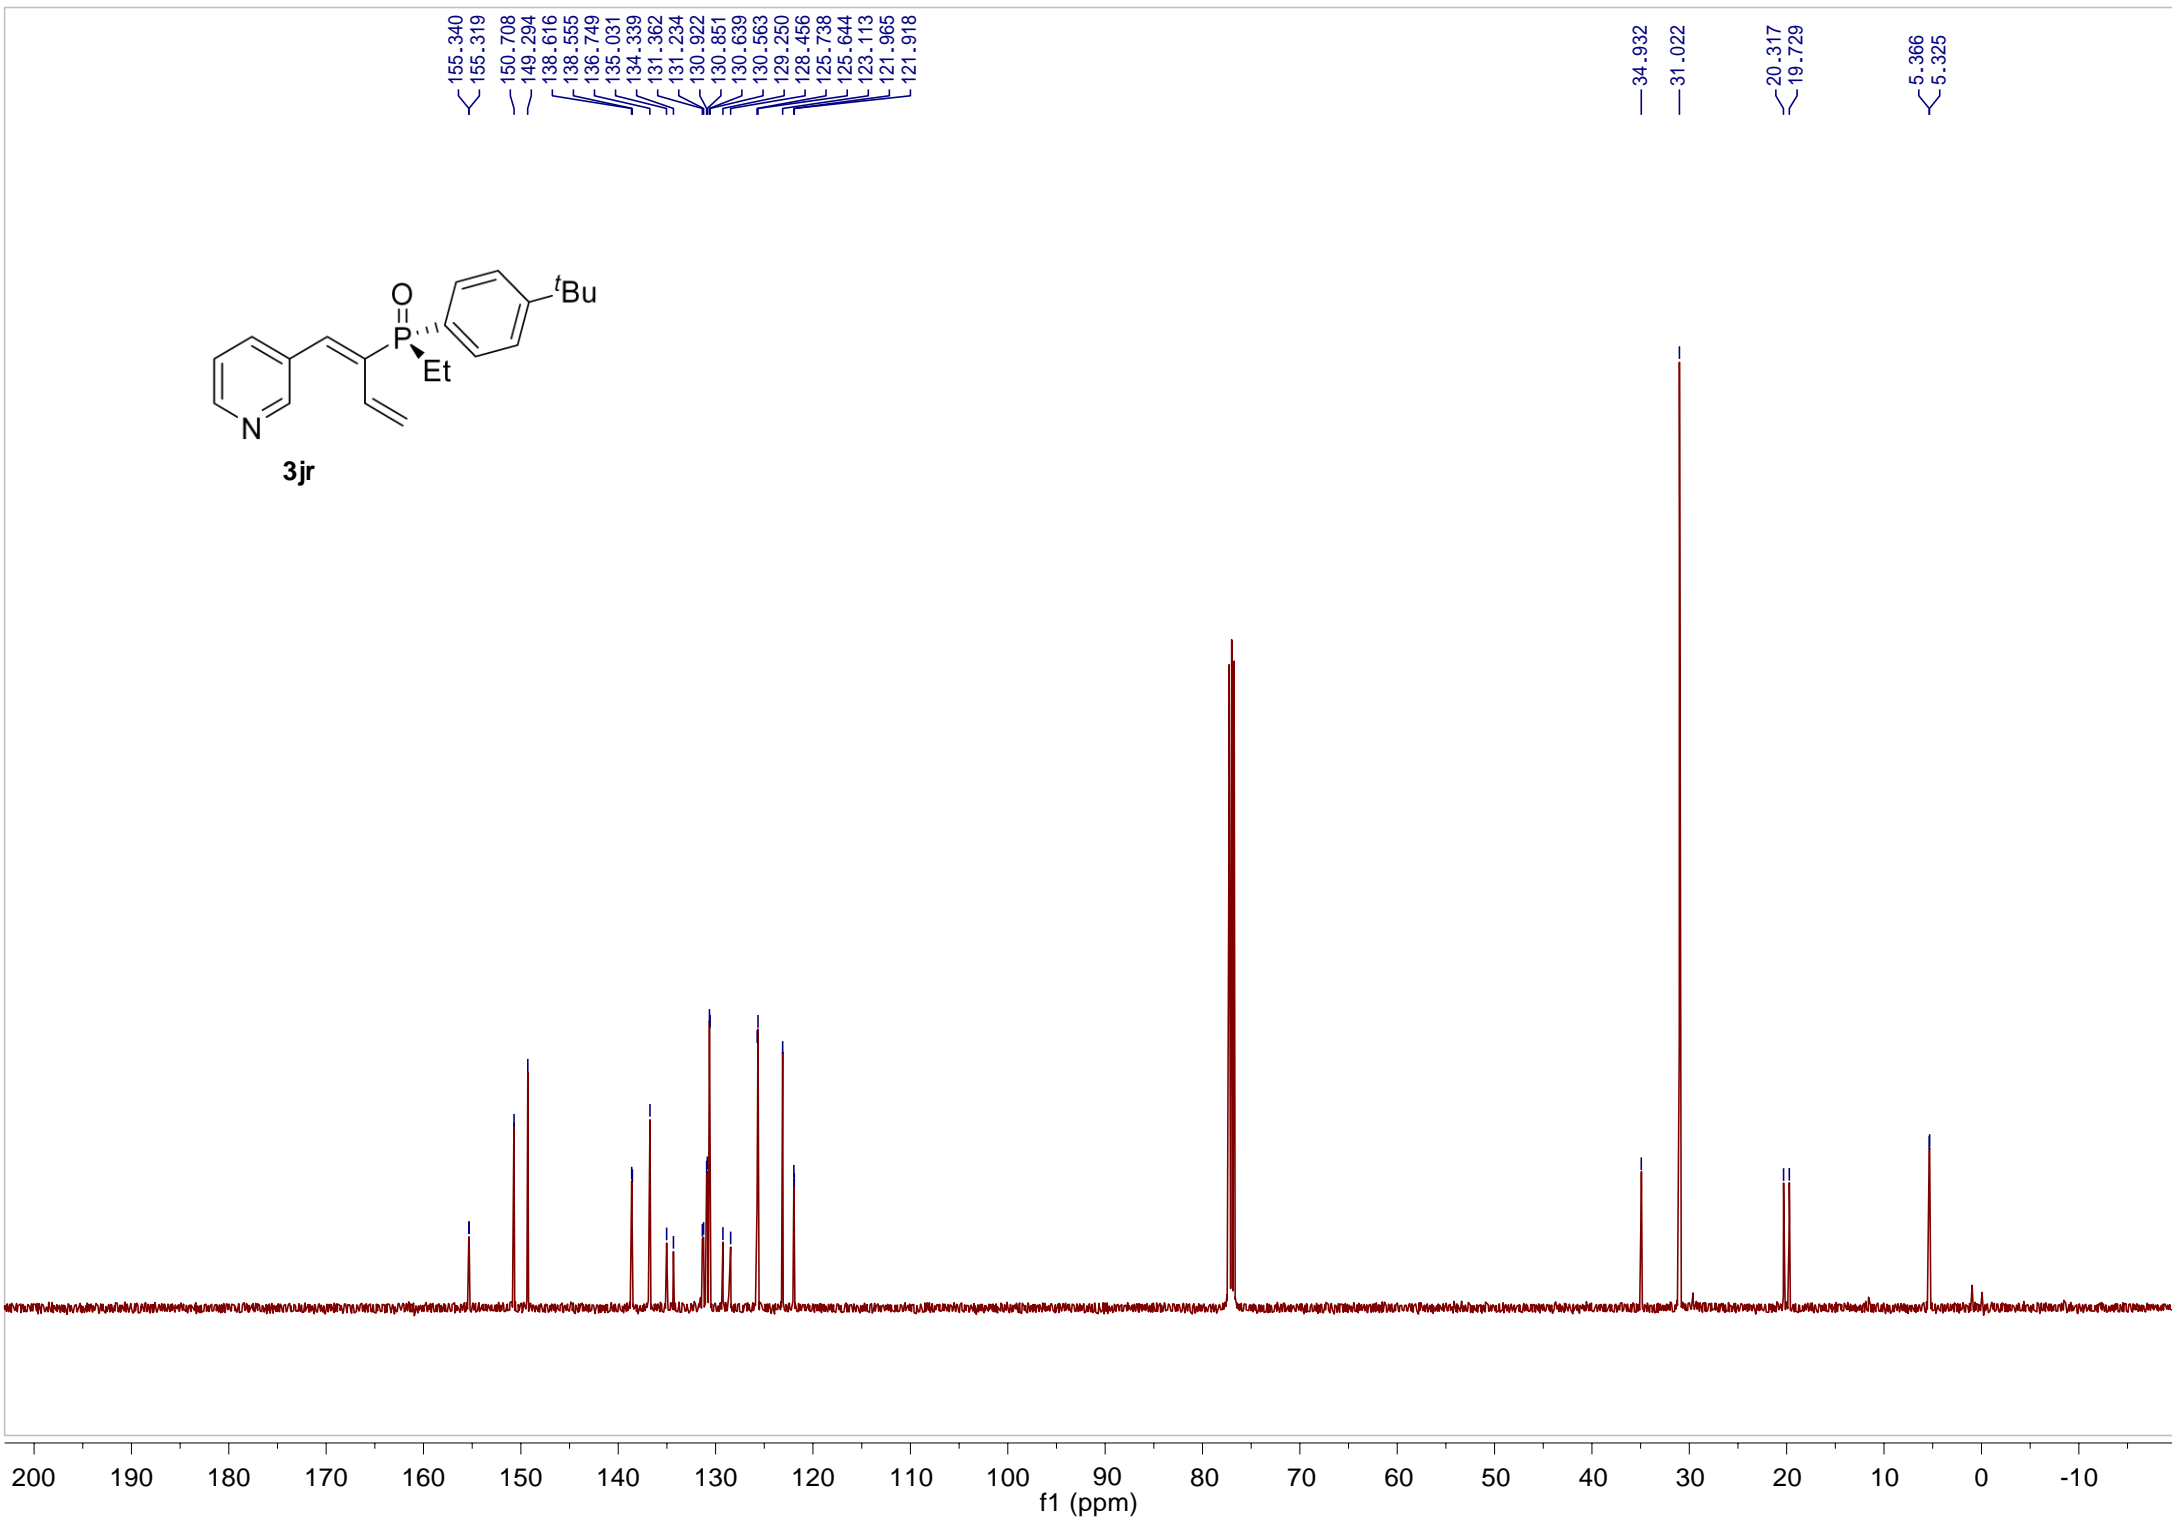

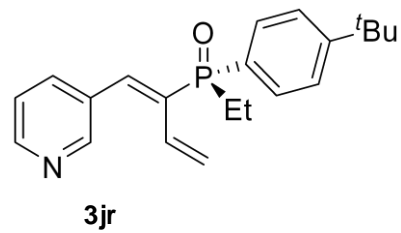

—34.897

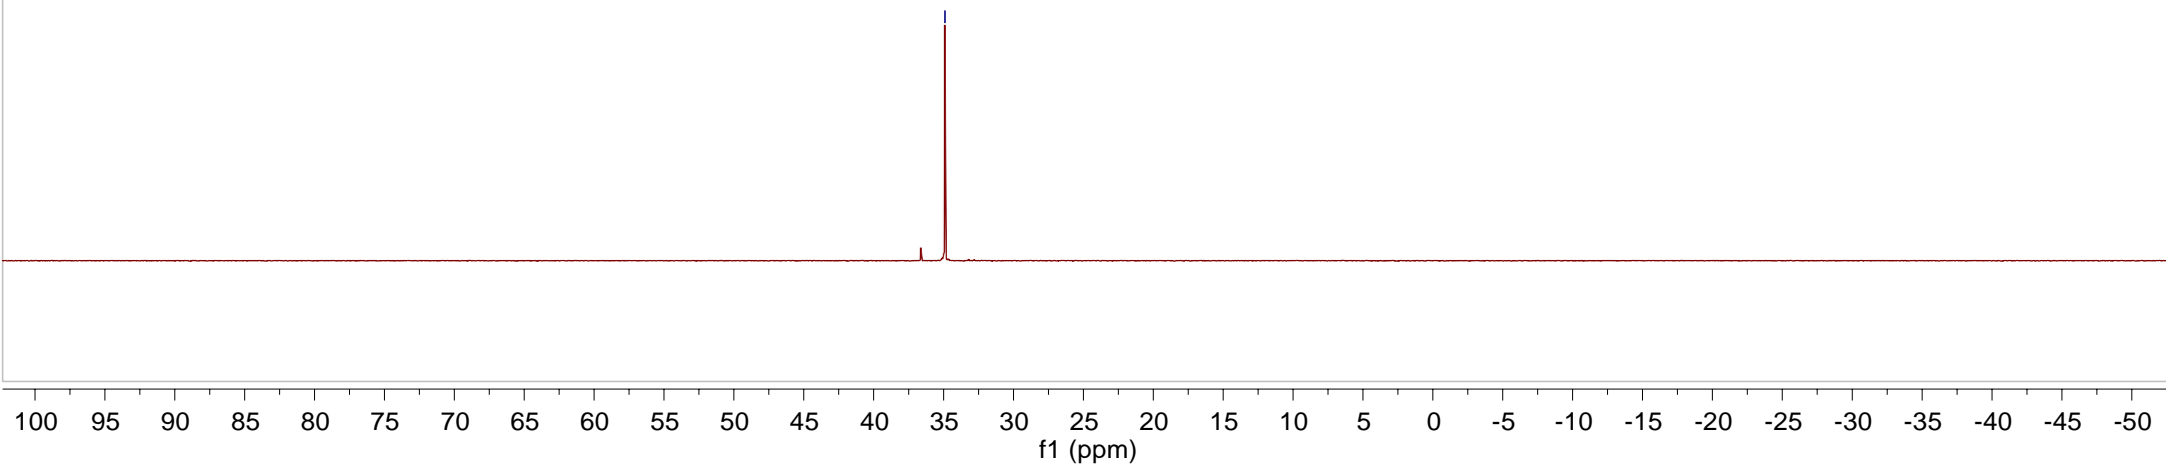

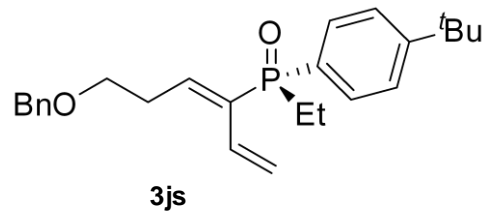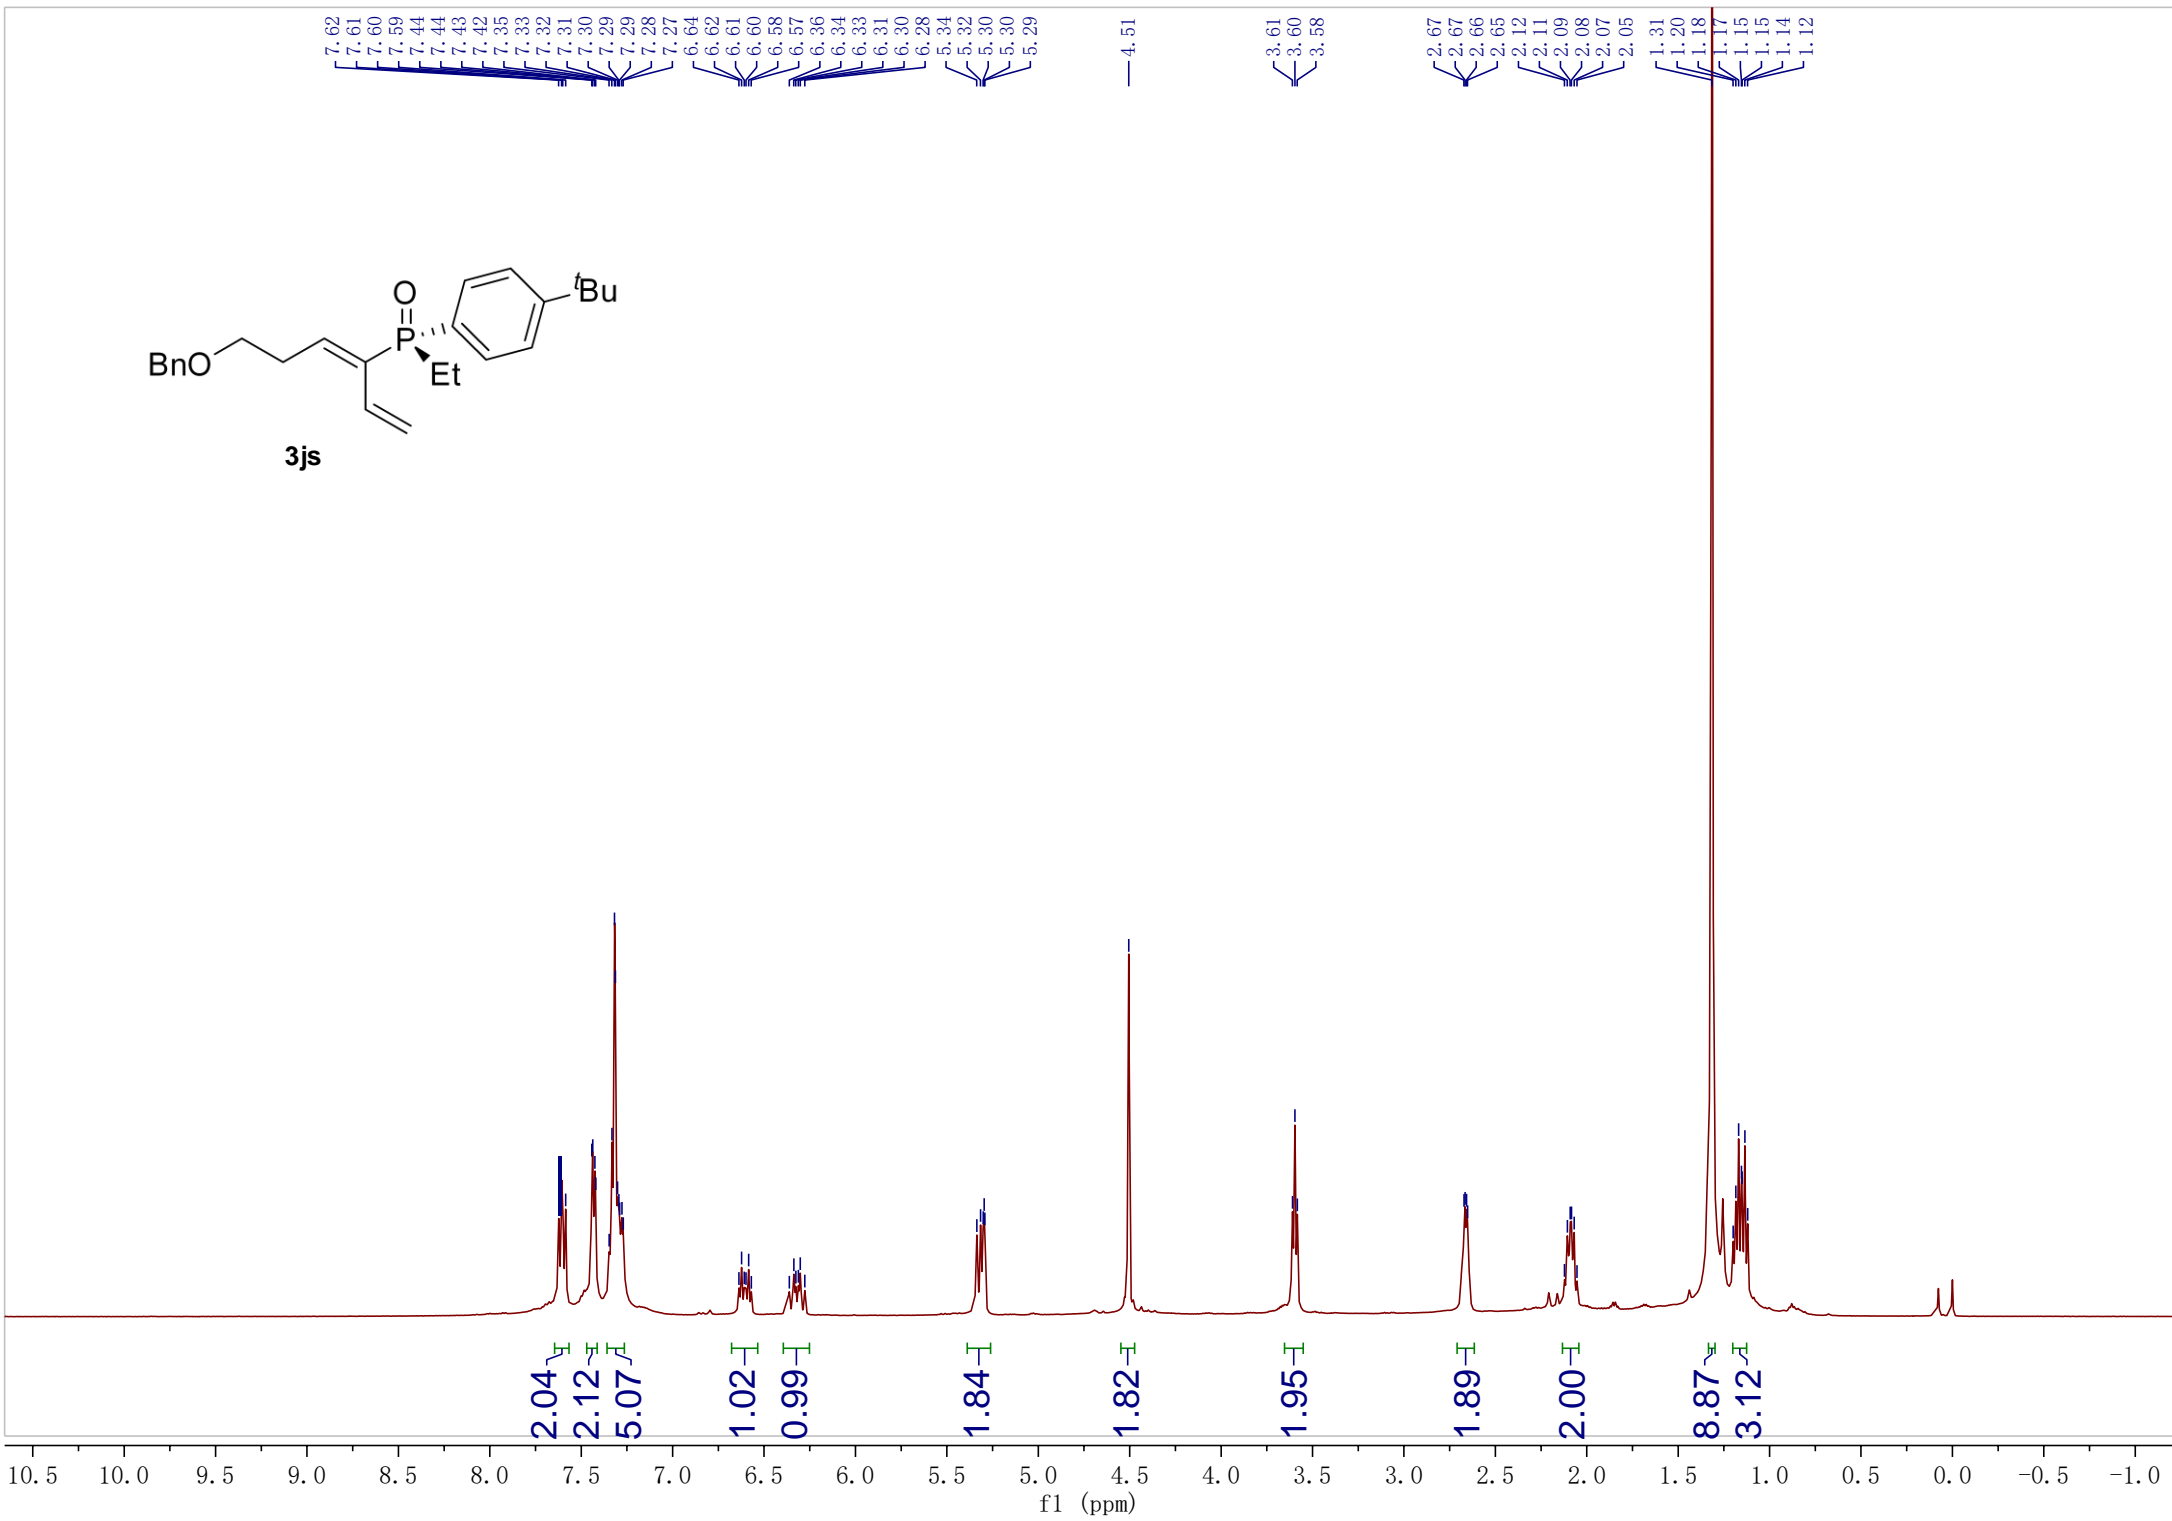

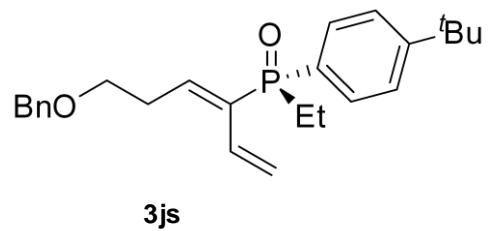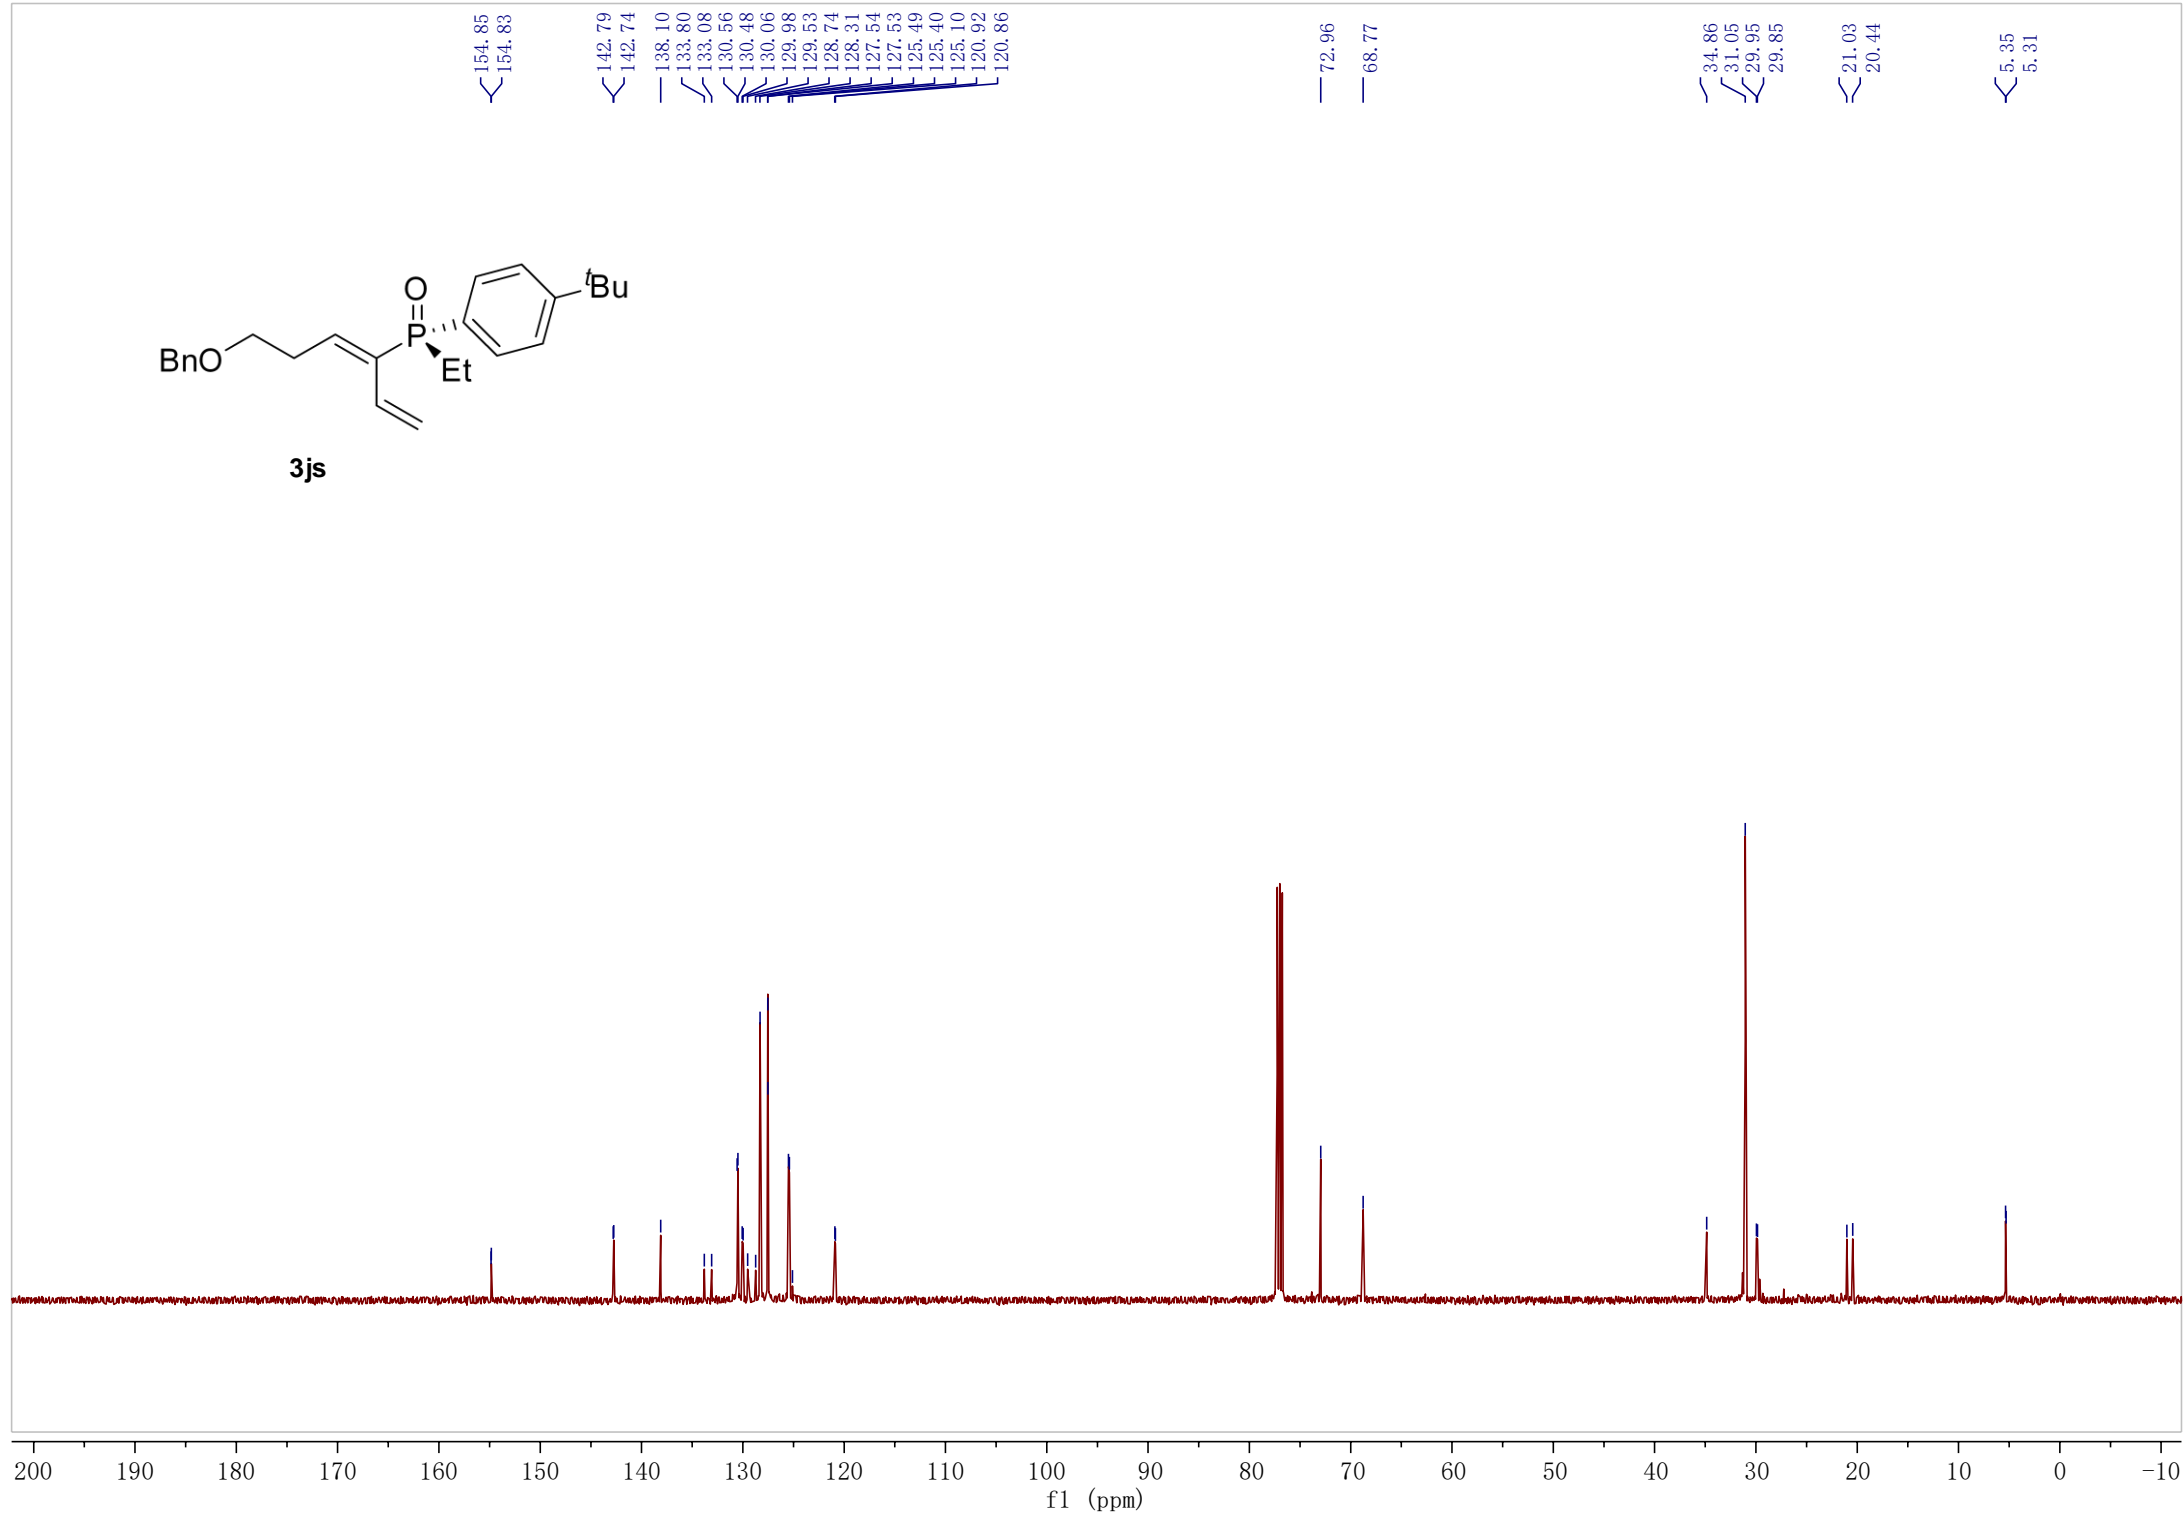

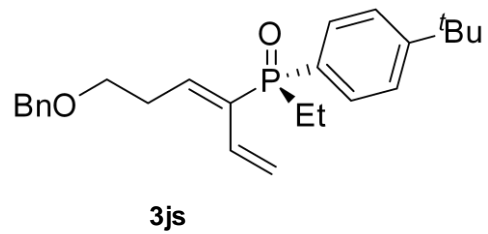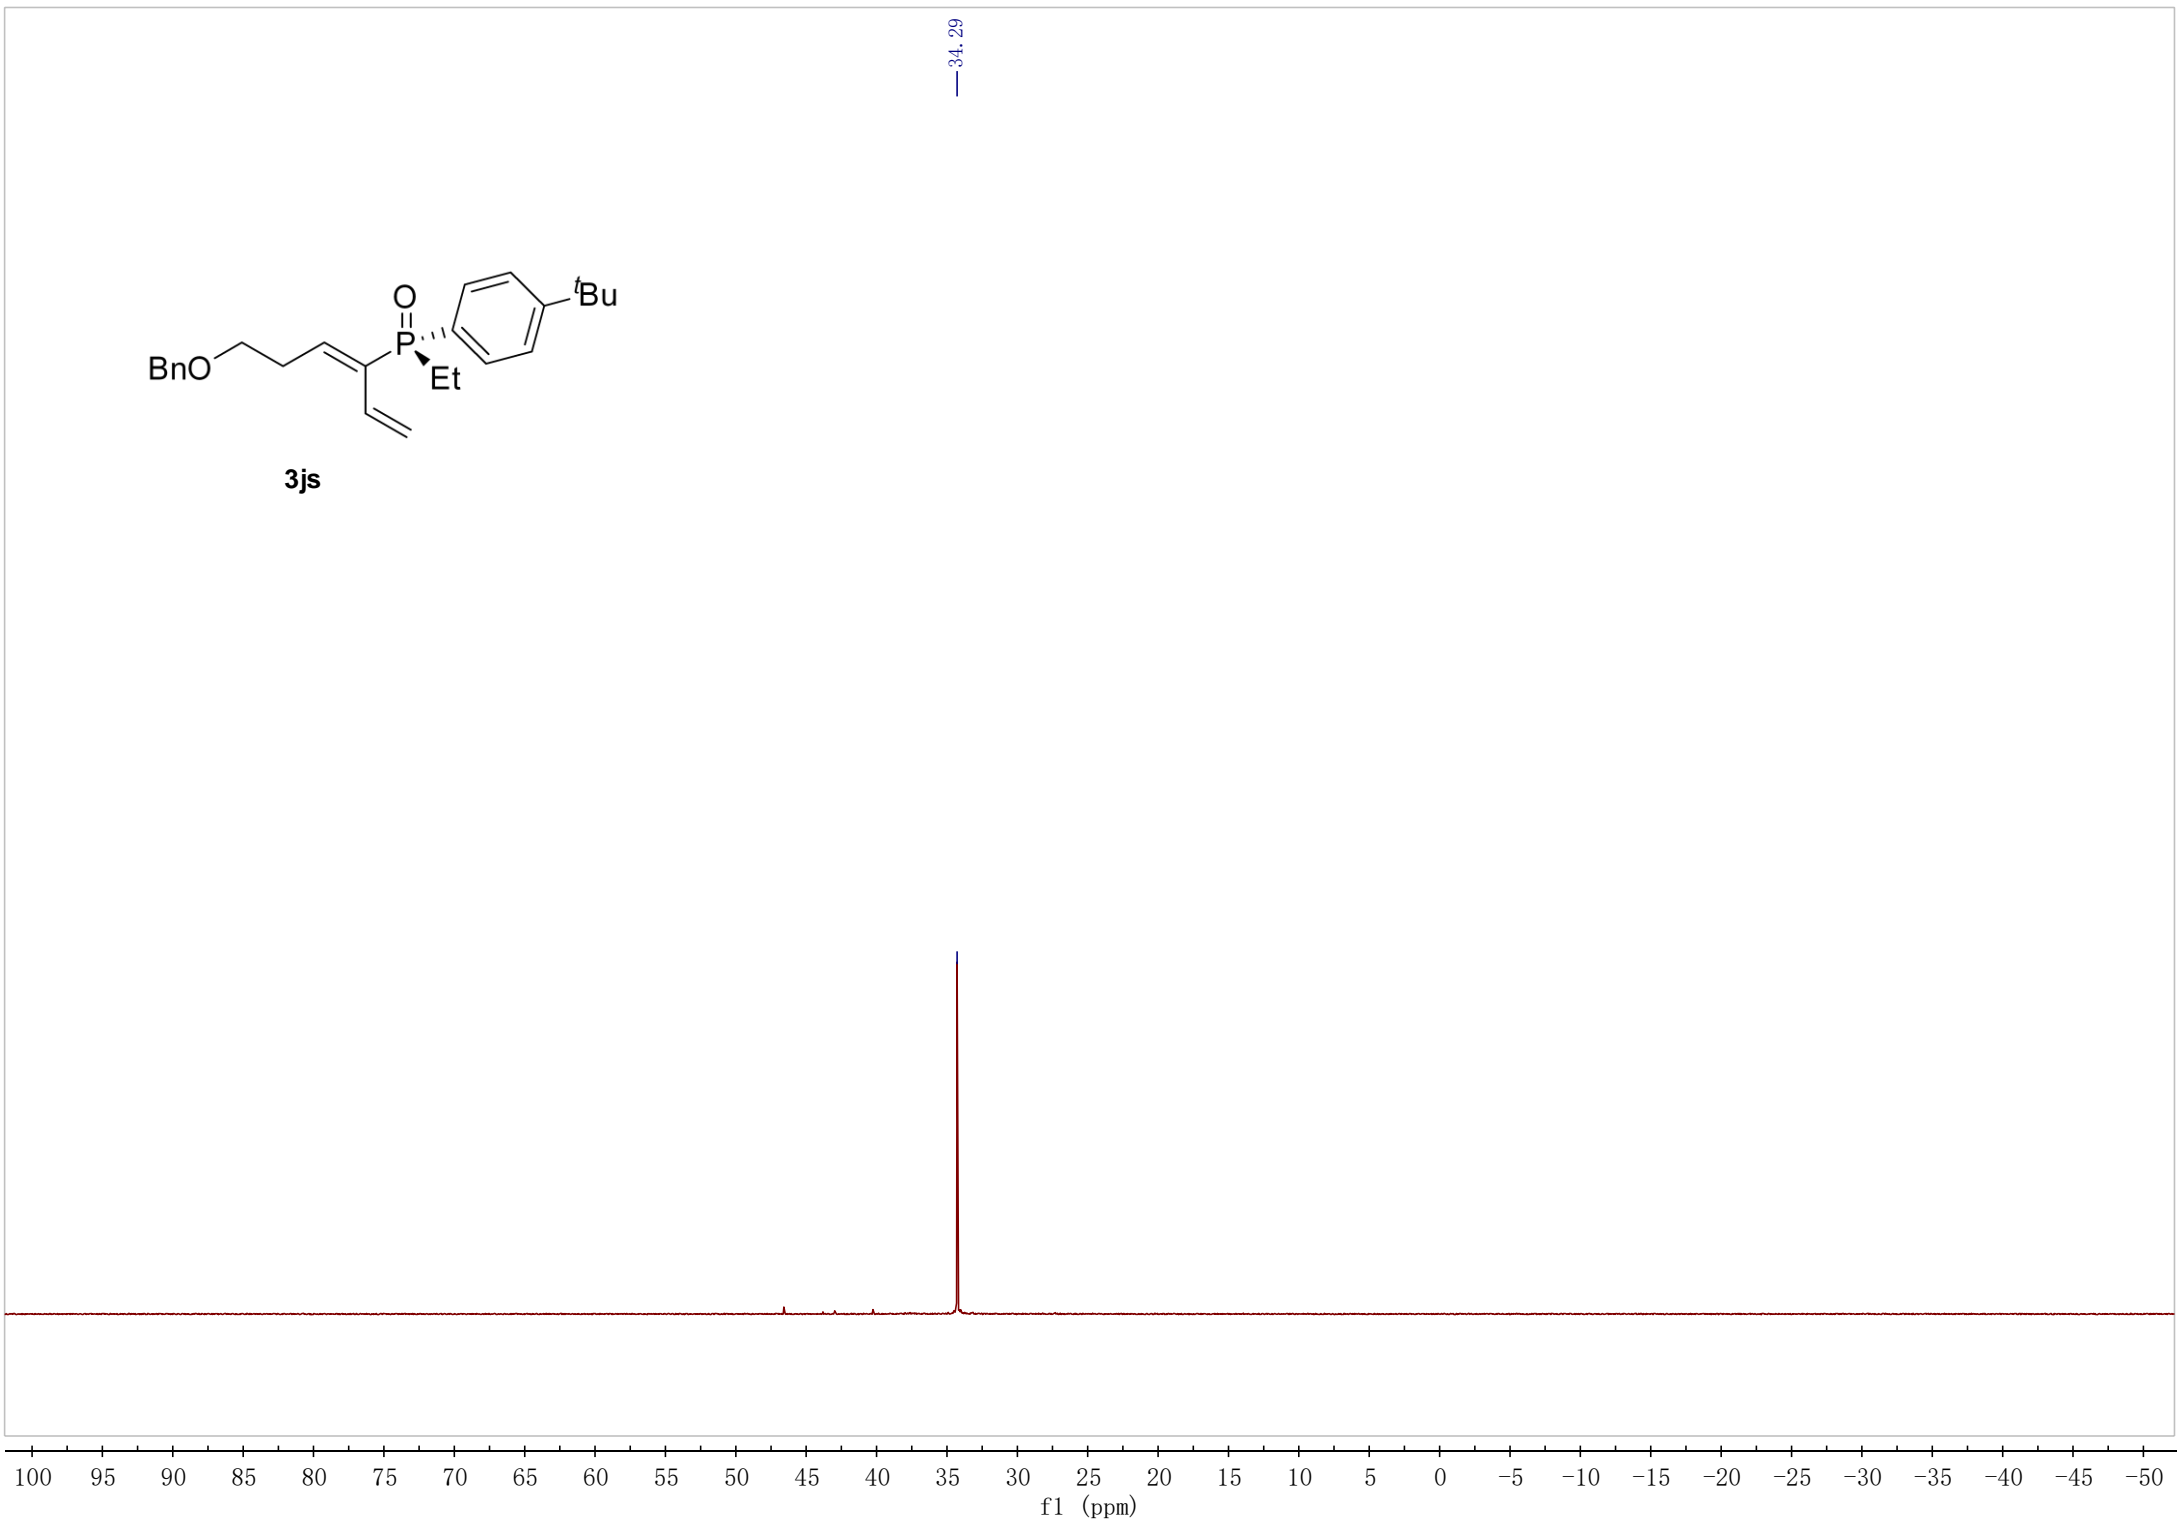

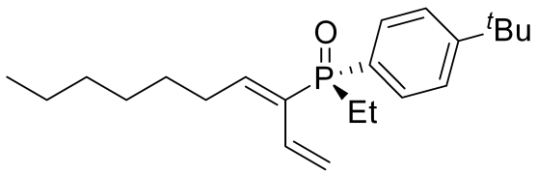

3jt

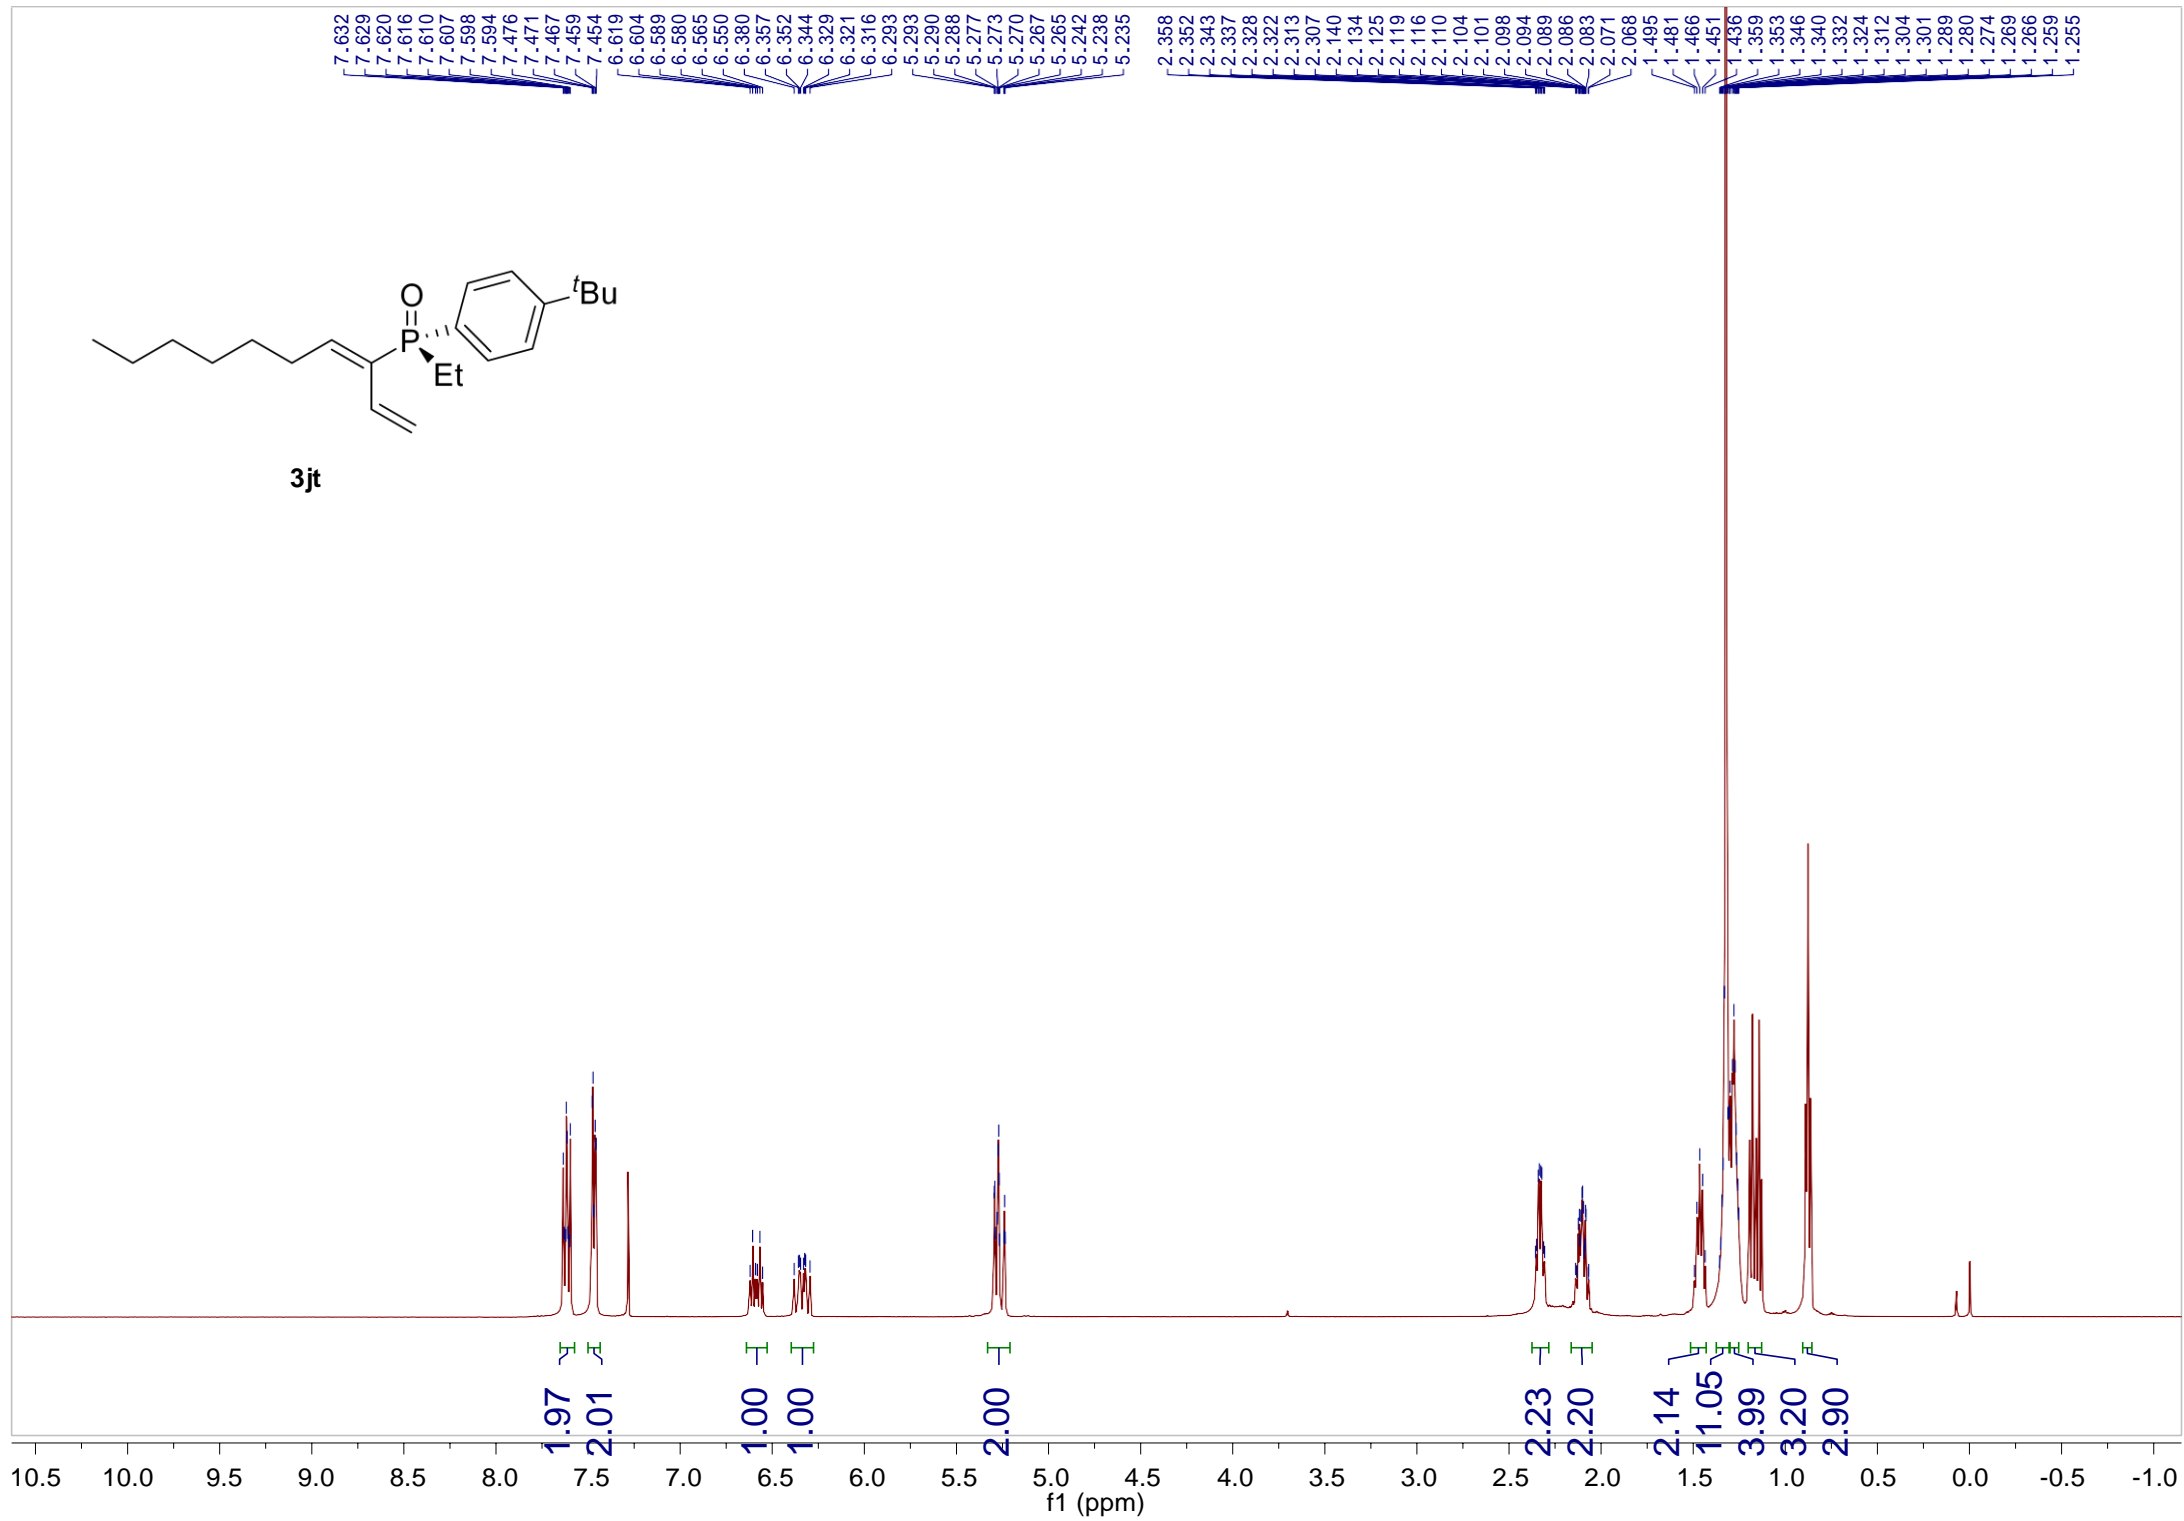



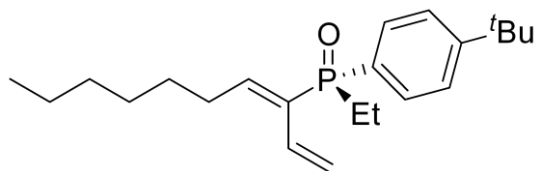

3jt

154.831  
154.809  
147.308  
147.260  
131.650  
130.920  
130.524  
130.448  
130.221  
130.132  
129.859  
129.074  
125.500  
125.408  
120.293  
120.236

34.879  
31.535  
31.063  
29.200  
29.098  
28.956  
28.842  
28.829  
22.517  
21.000  
20.416  
14.001  
5.379  
5.340

200 190 180 170 160 150 140 130 120 110 100 90 80 70 60 50 40 30 20 10 0 -10

f1 (ppm)

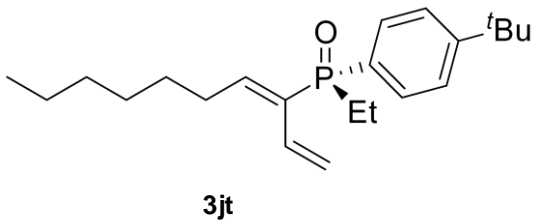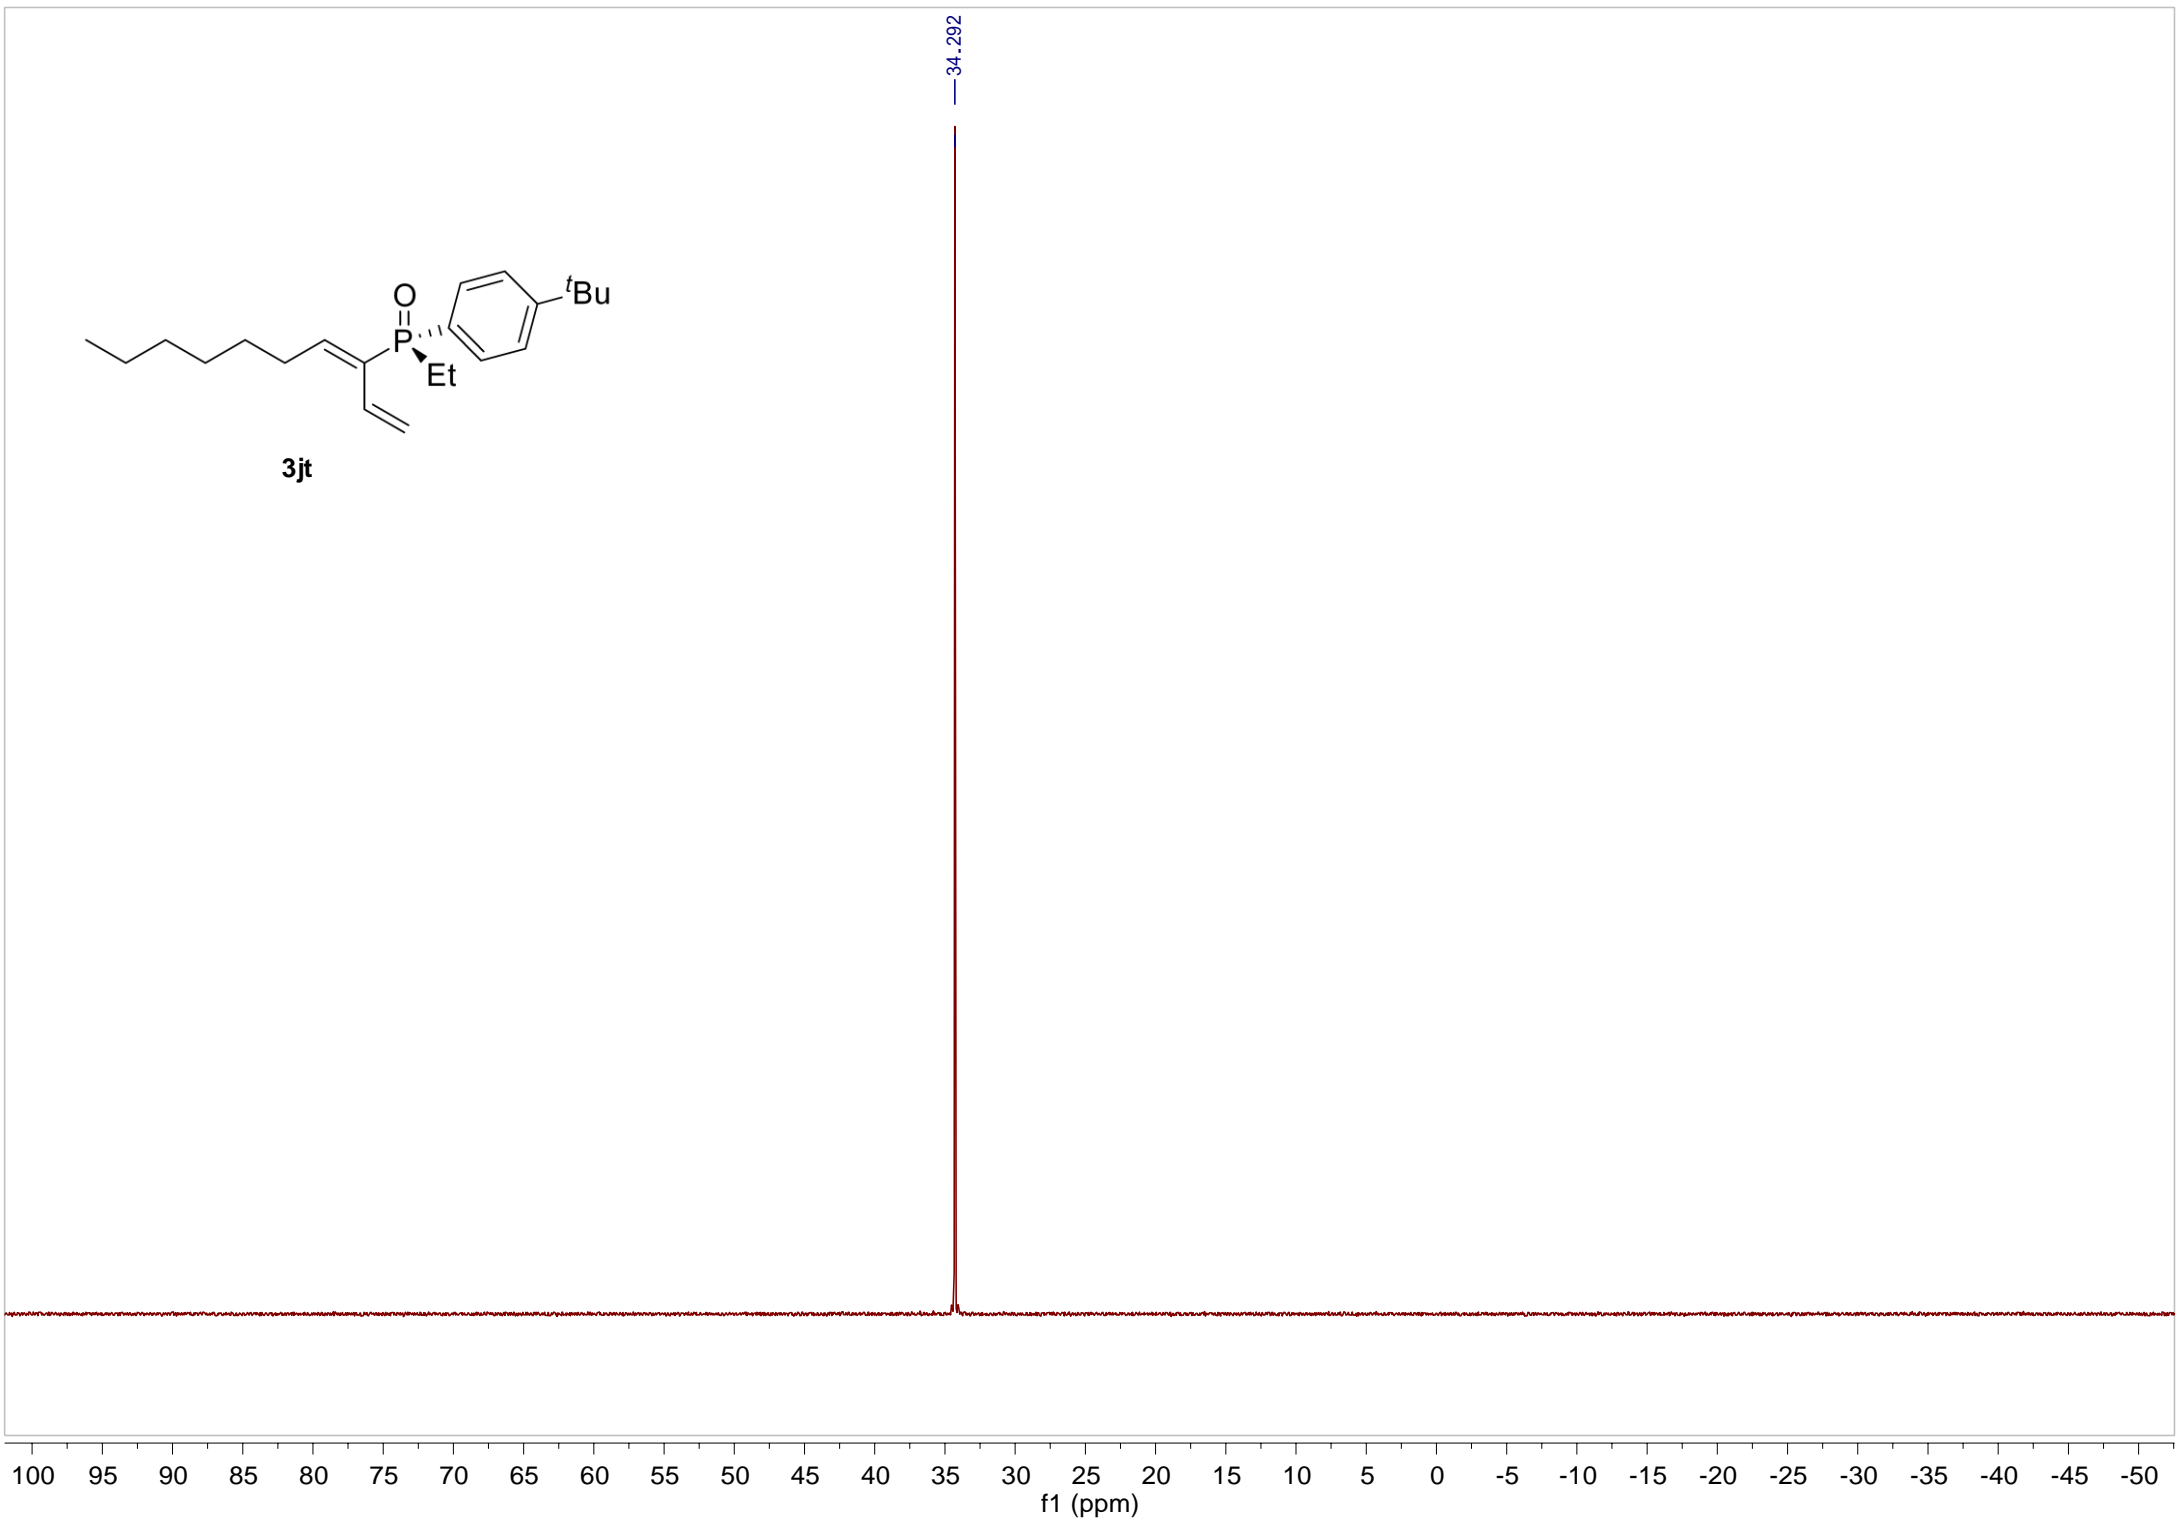

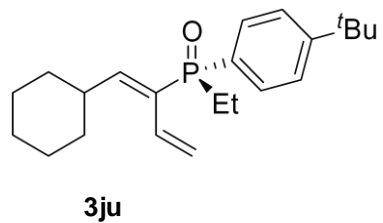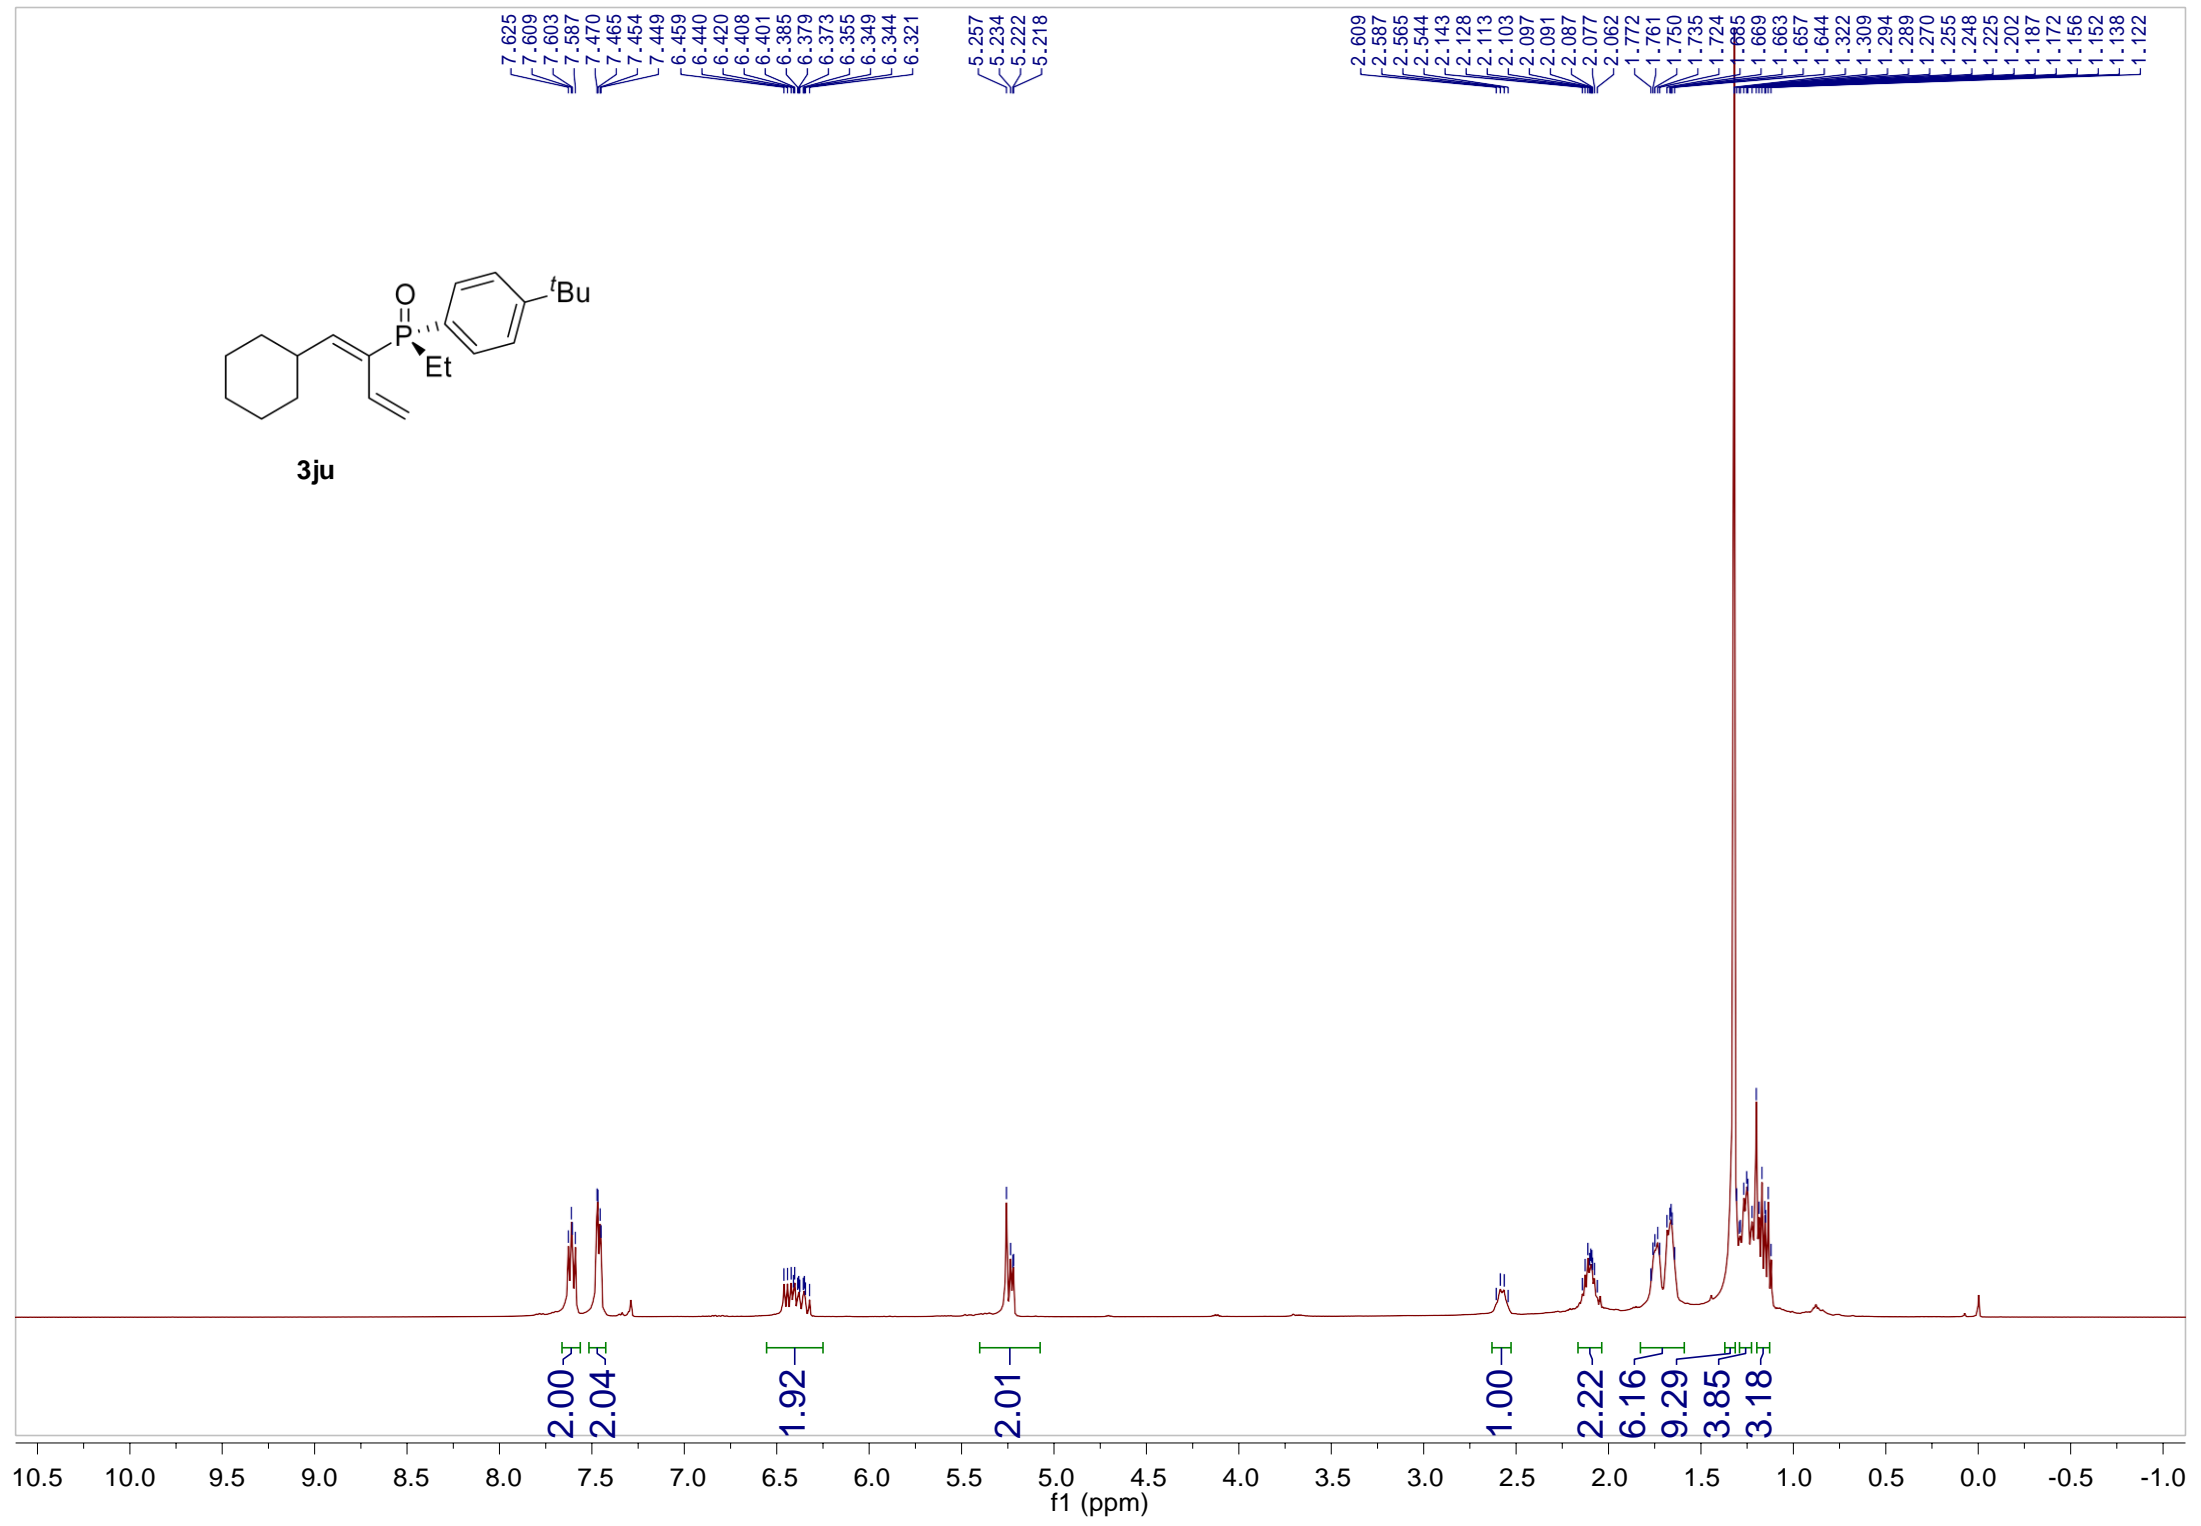

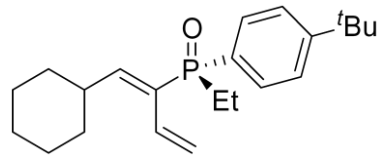

**3ju**

154.755  
154.735  
152.126  
152.083

130.495  
130.419  
130.316  
130.228  
129.942  
129.526  
129.159  
128.800  
125.464  
125.372  
120.057  
120.002

38.120  
38.023  
34.857  
32.355  
32.187  
31.053  
25.713  
25.451  
20.942  
20.359

5.365  
5.326

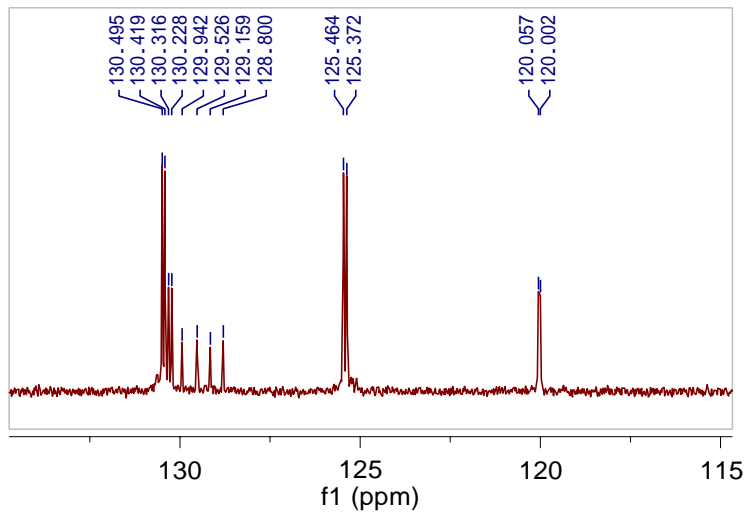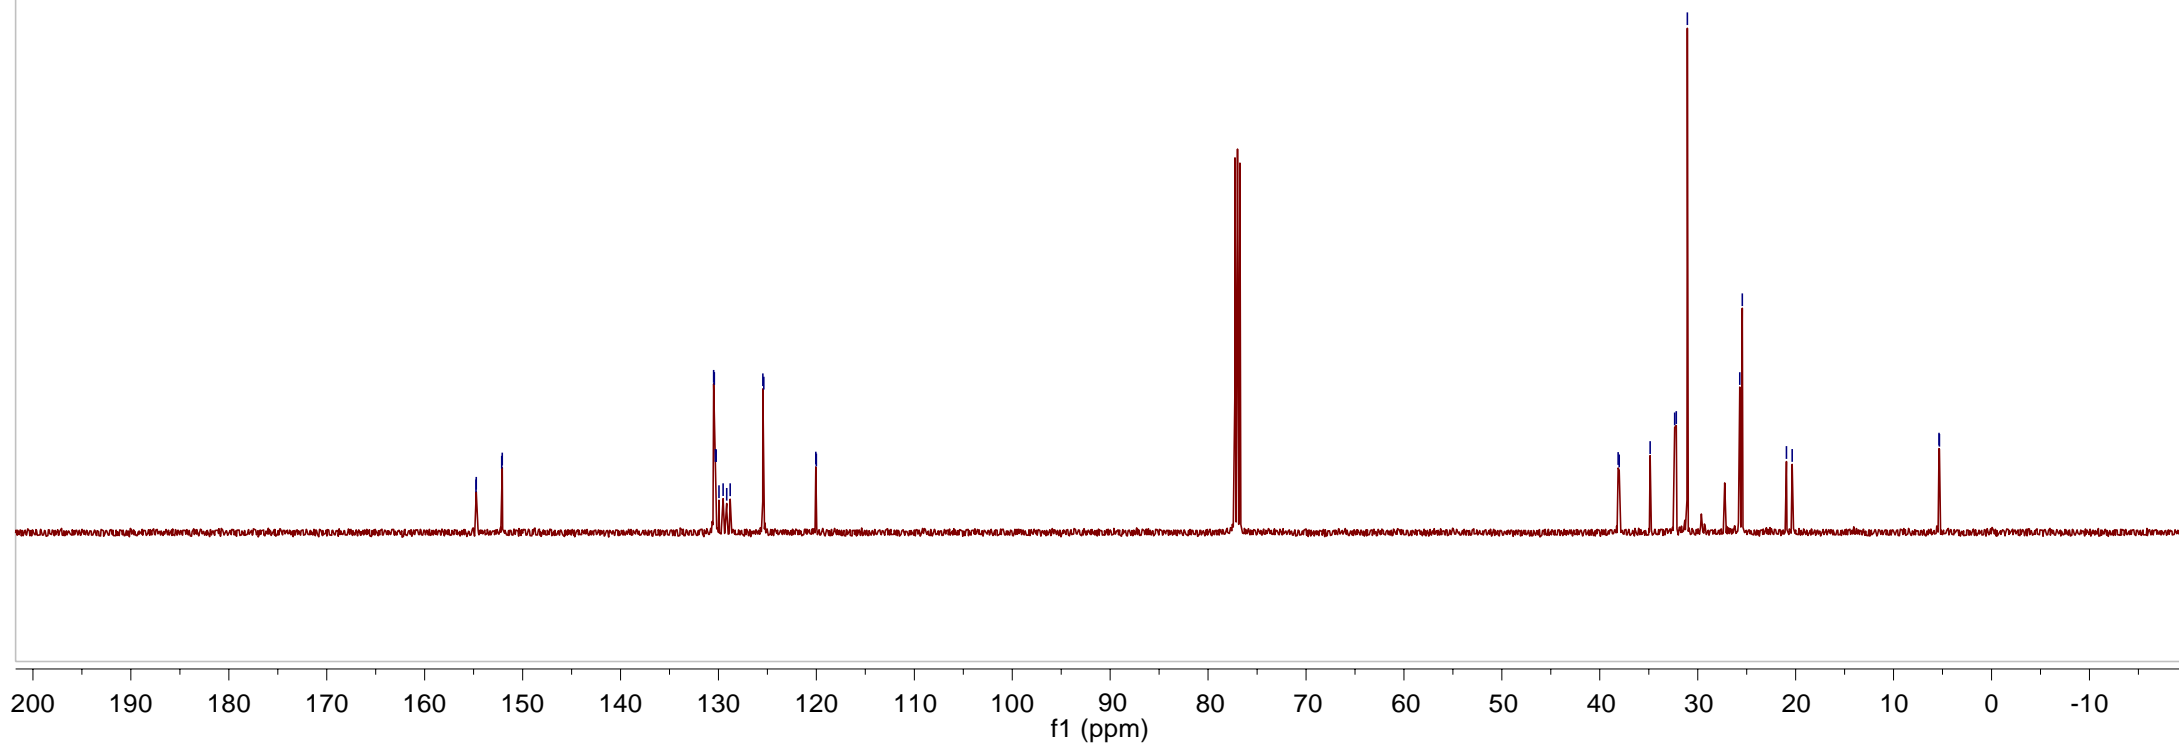

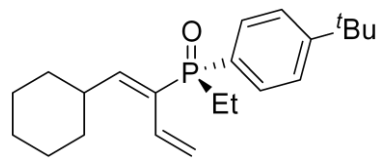

3ju

— 34.284

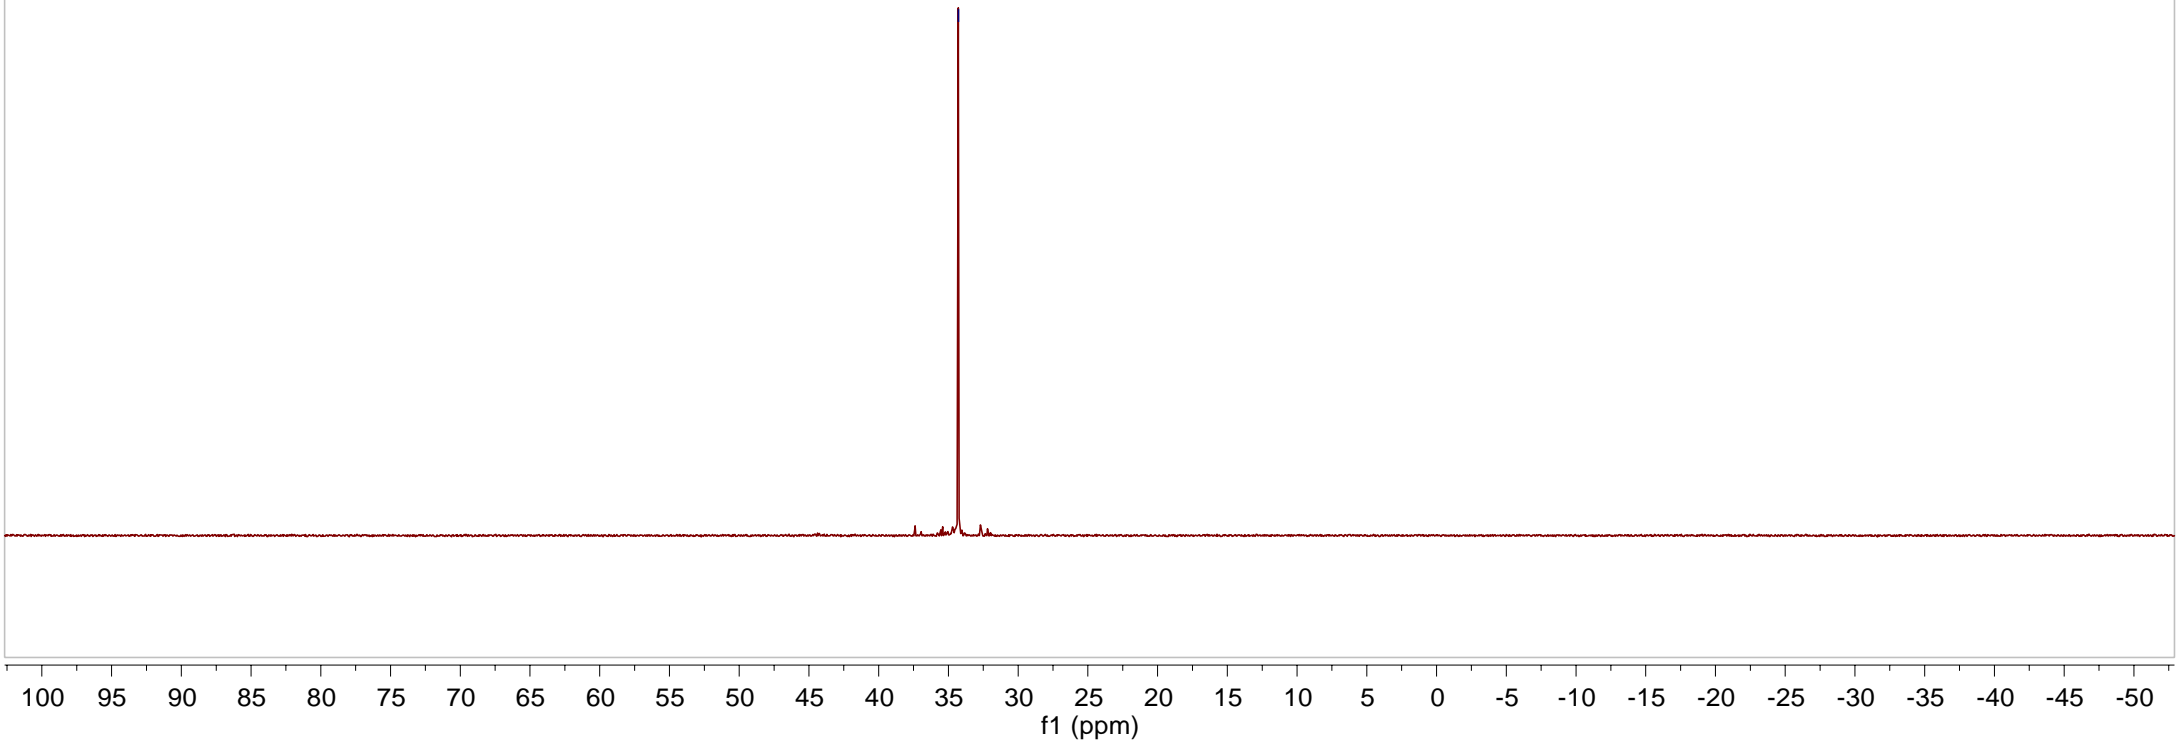

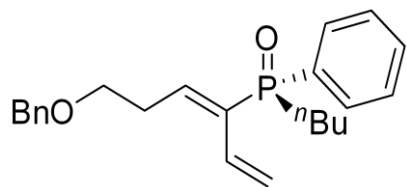

3jv

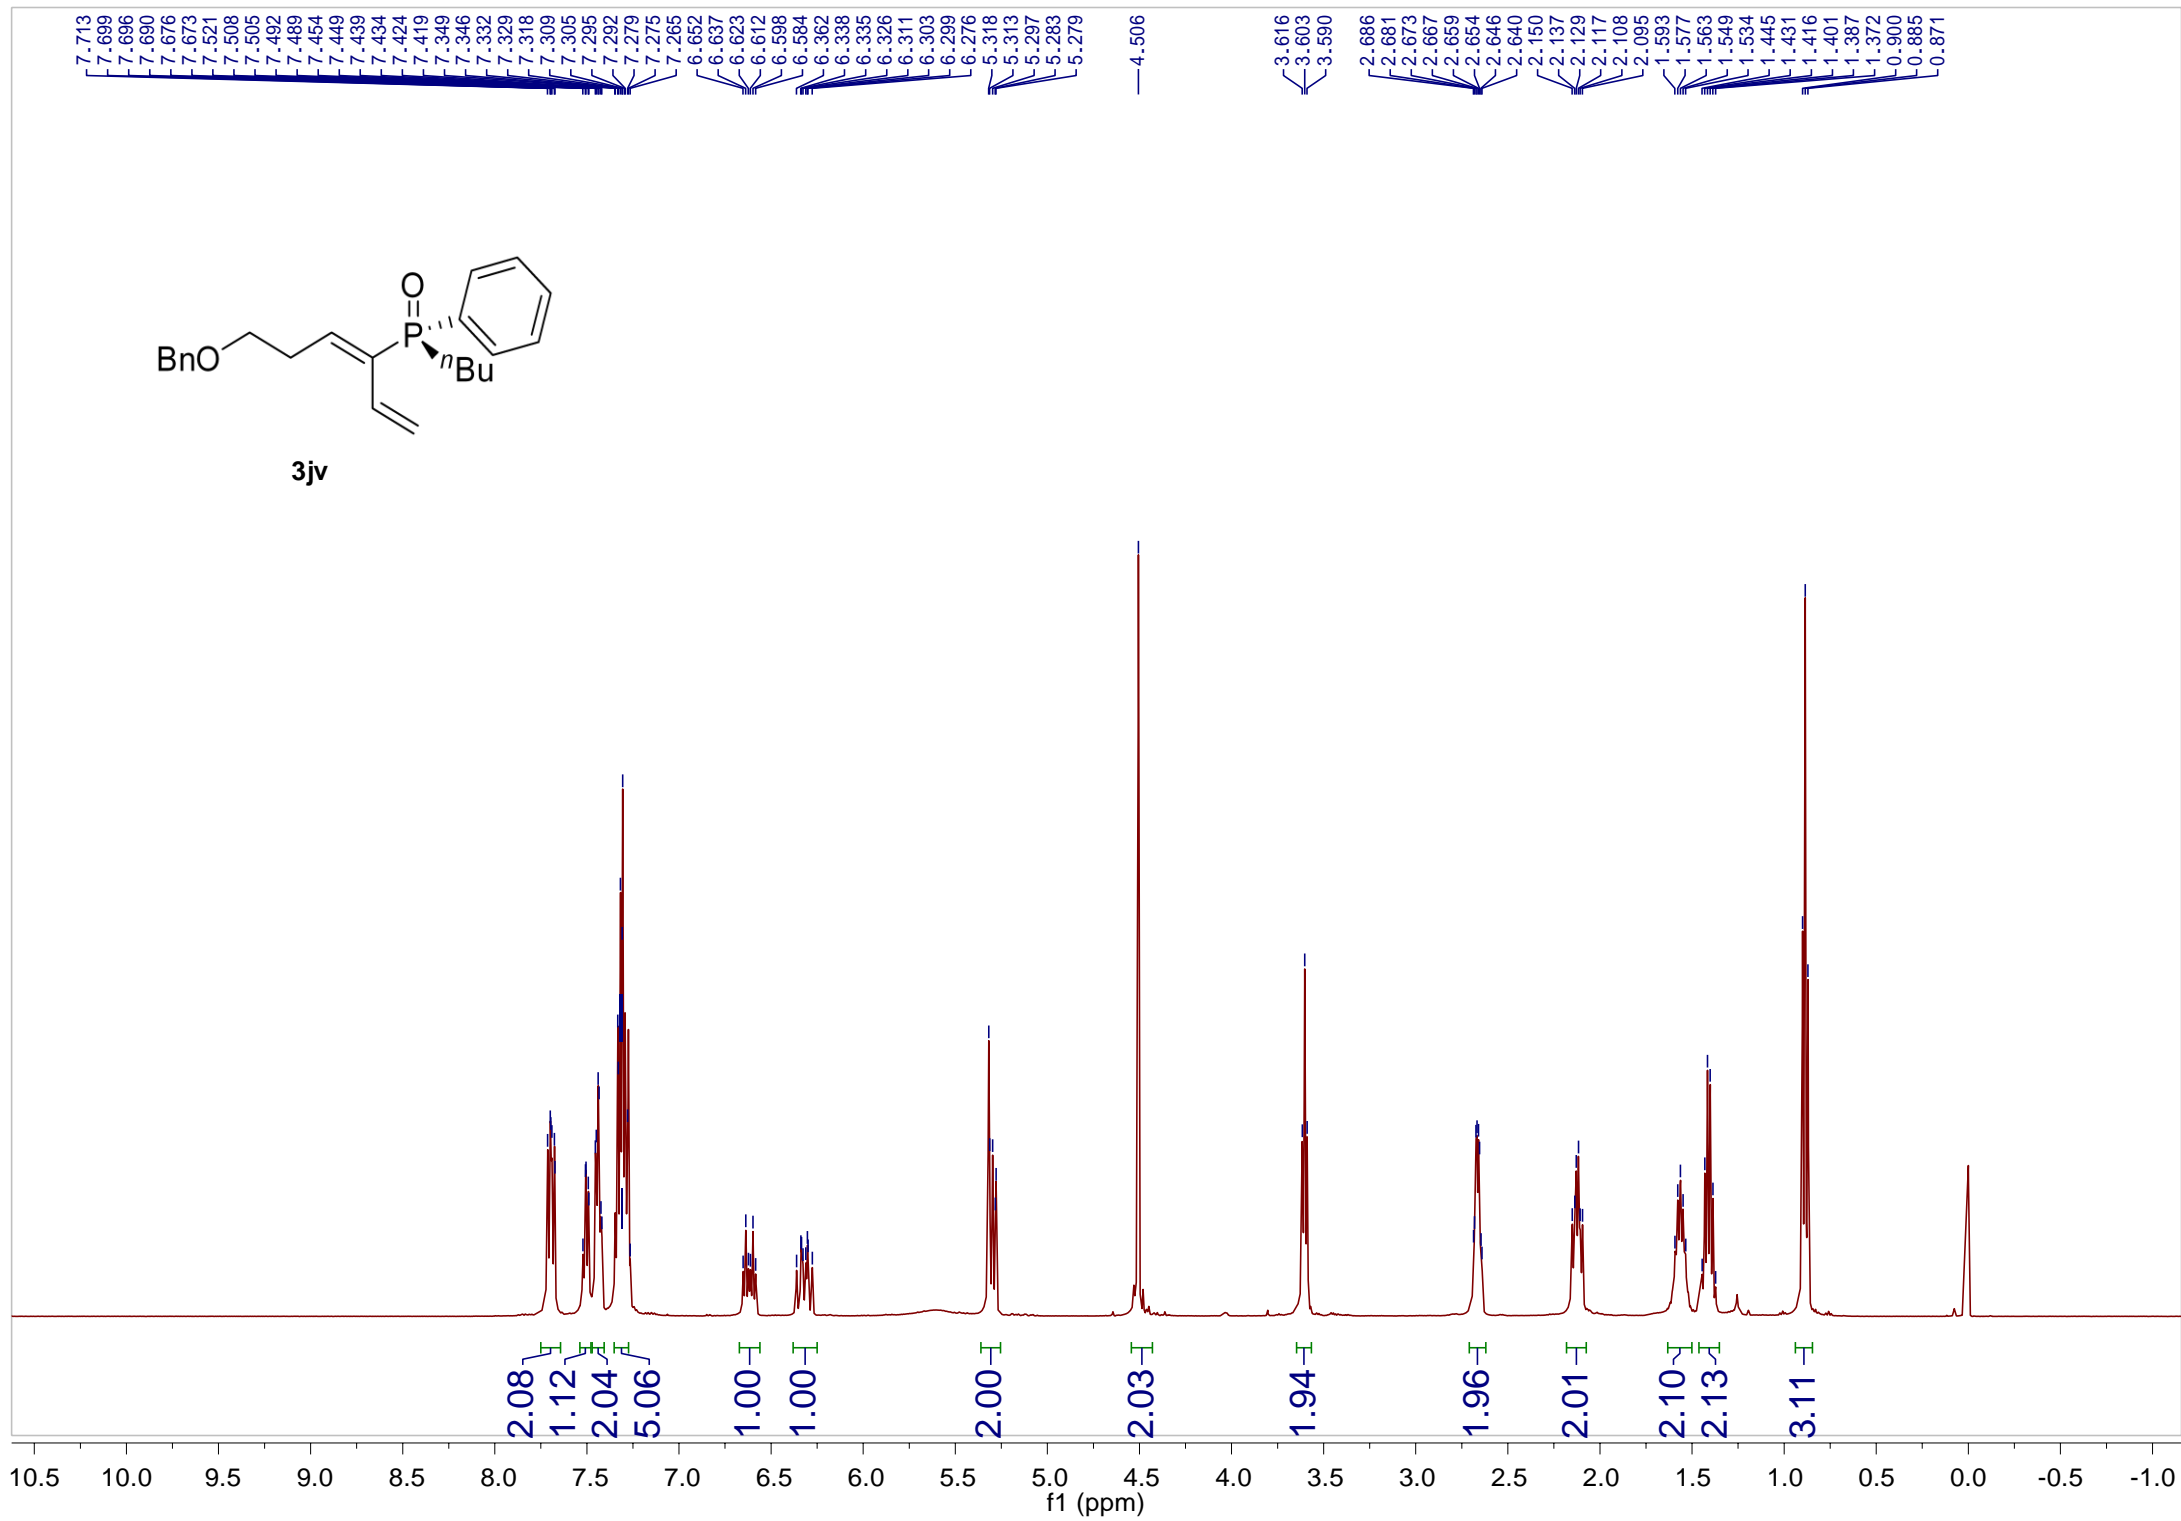

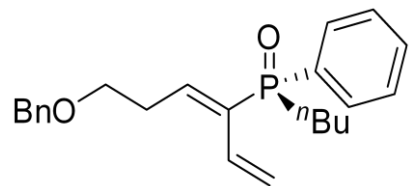

3jv

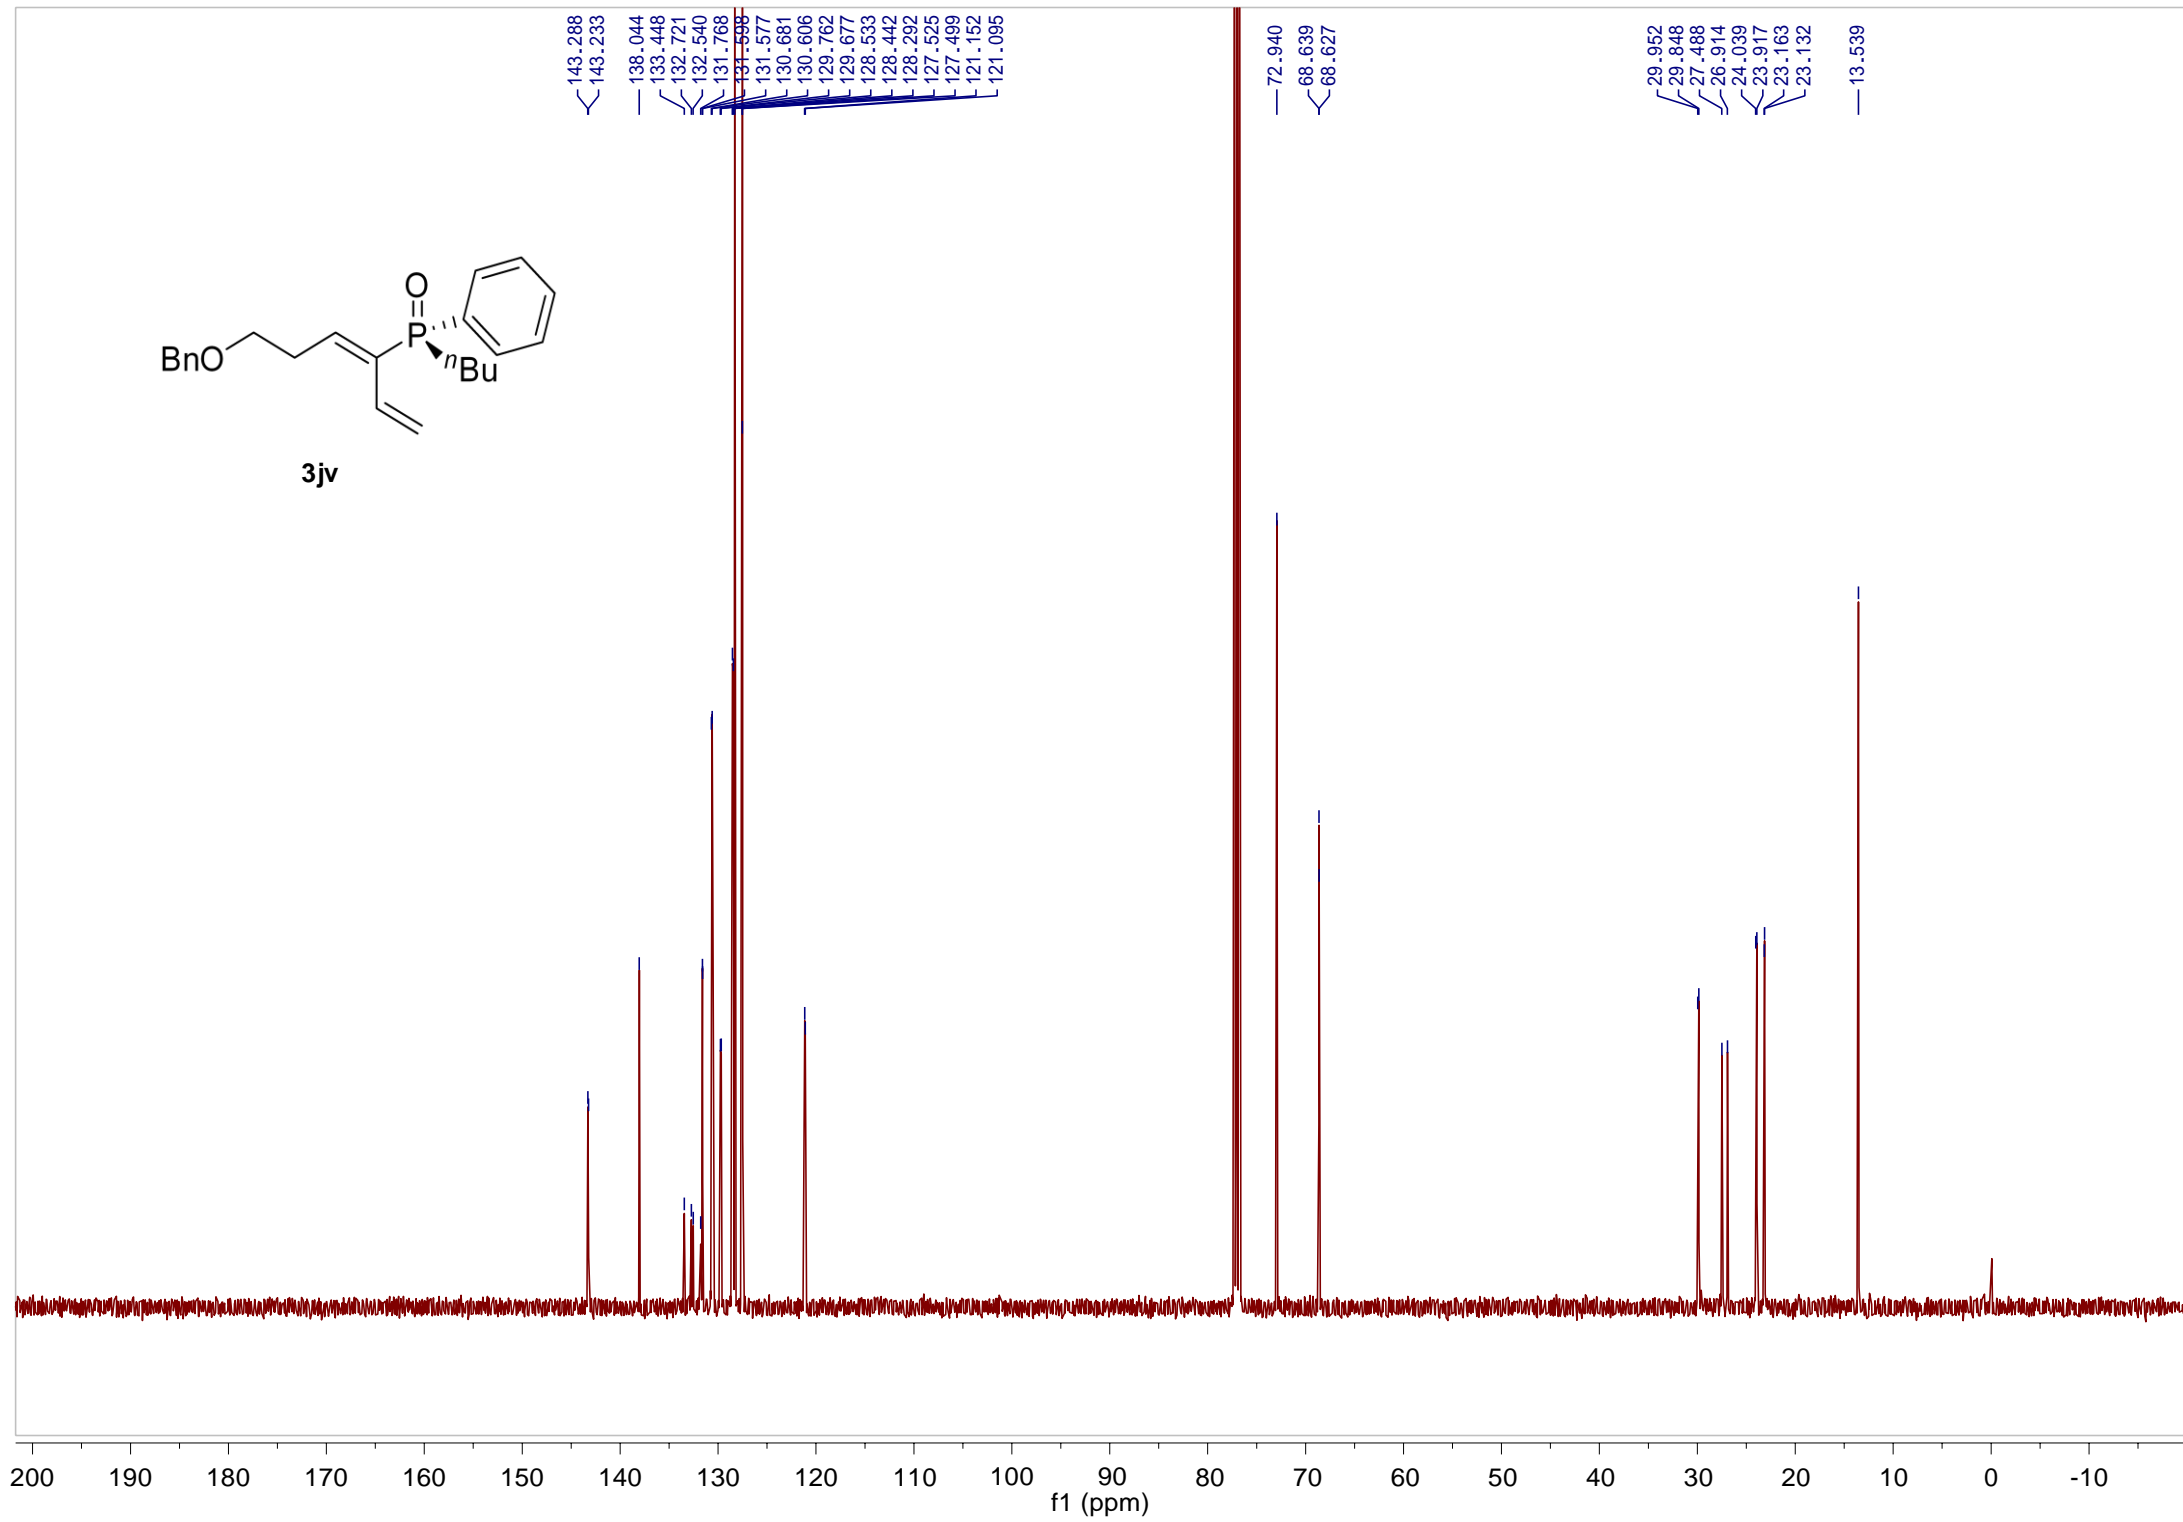

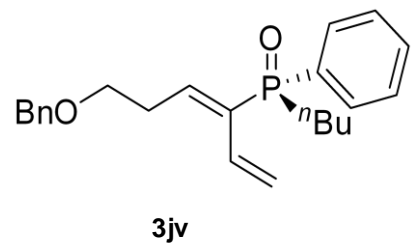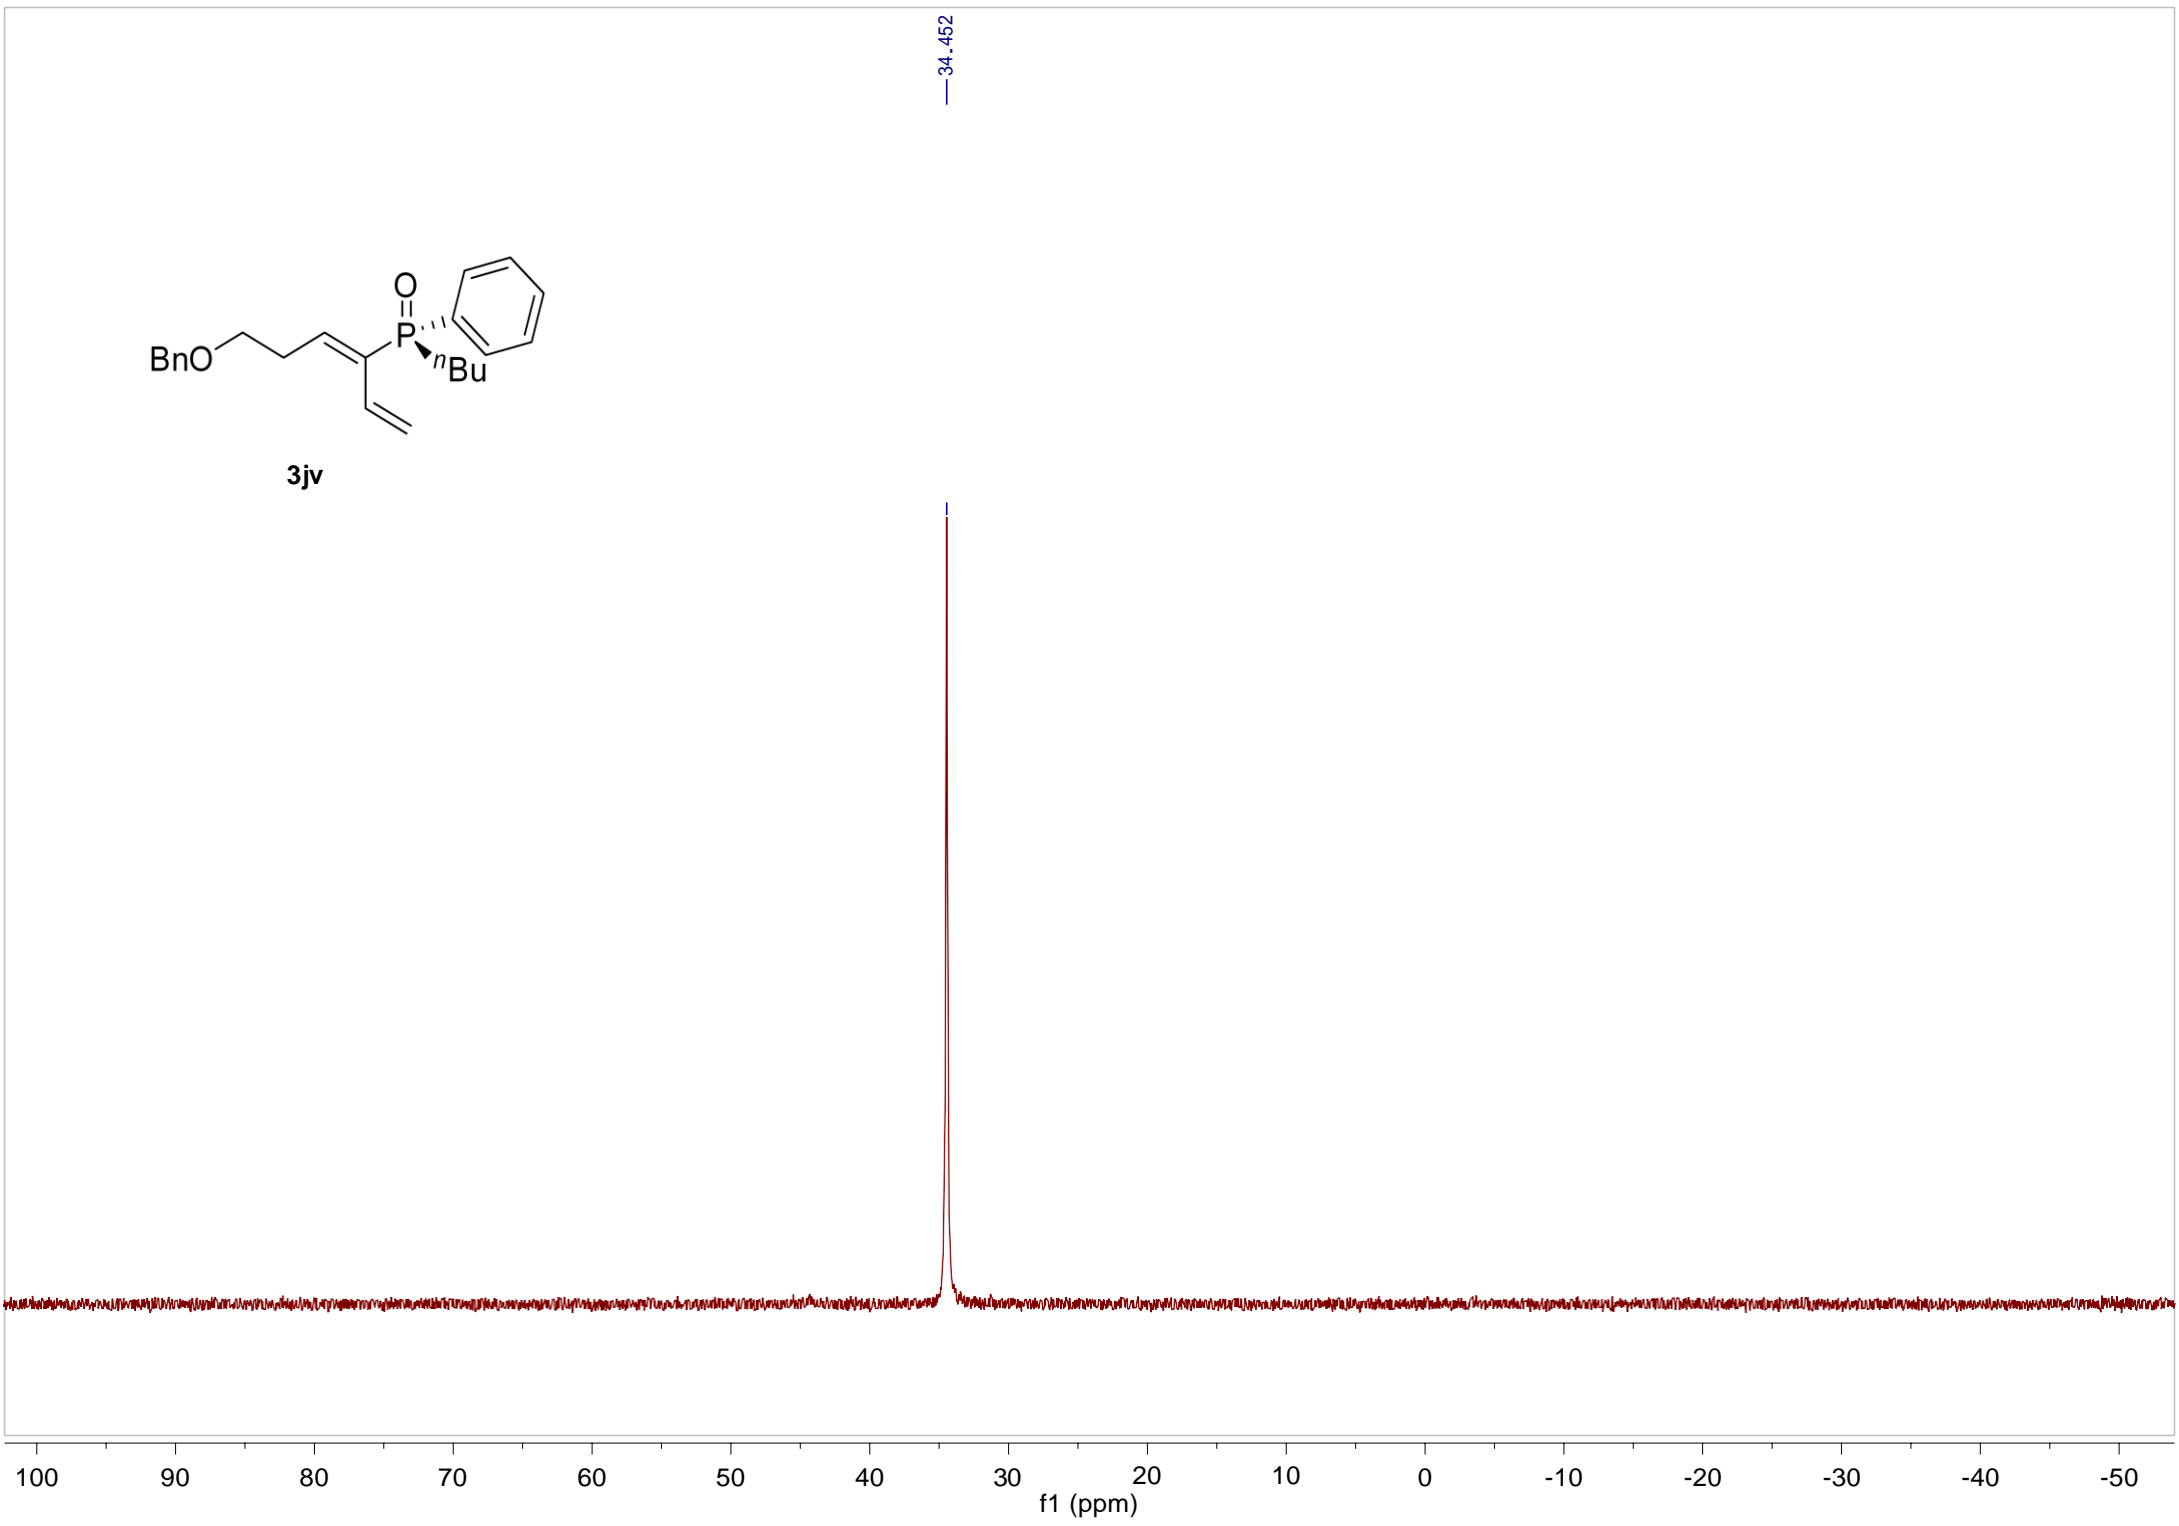



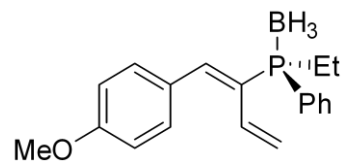

4

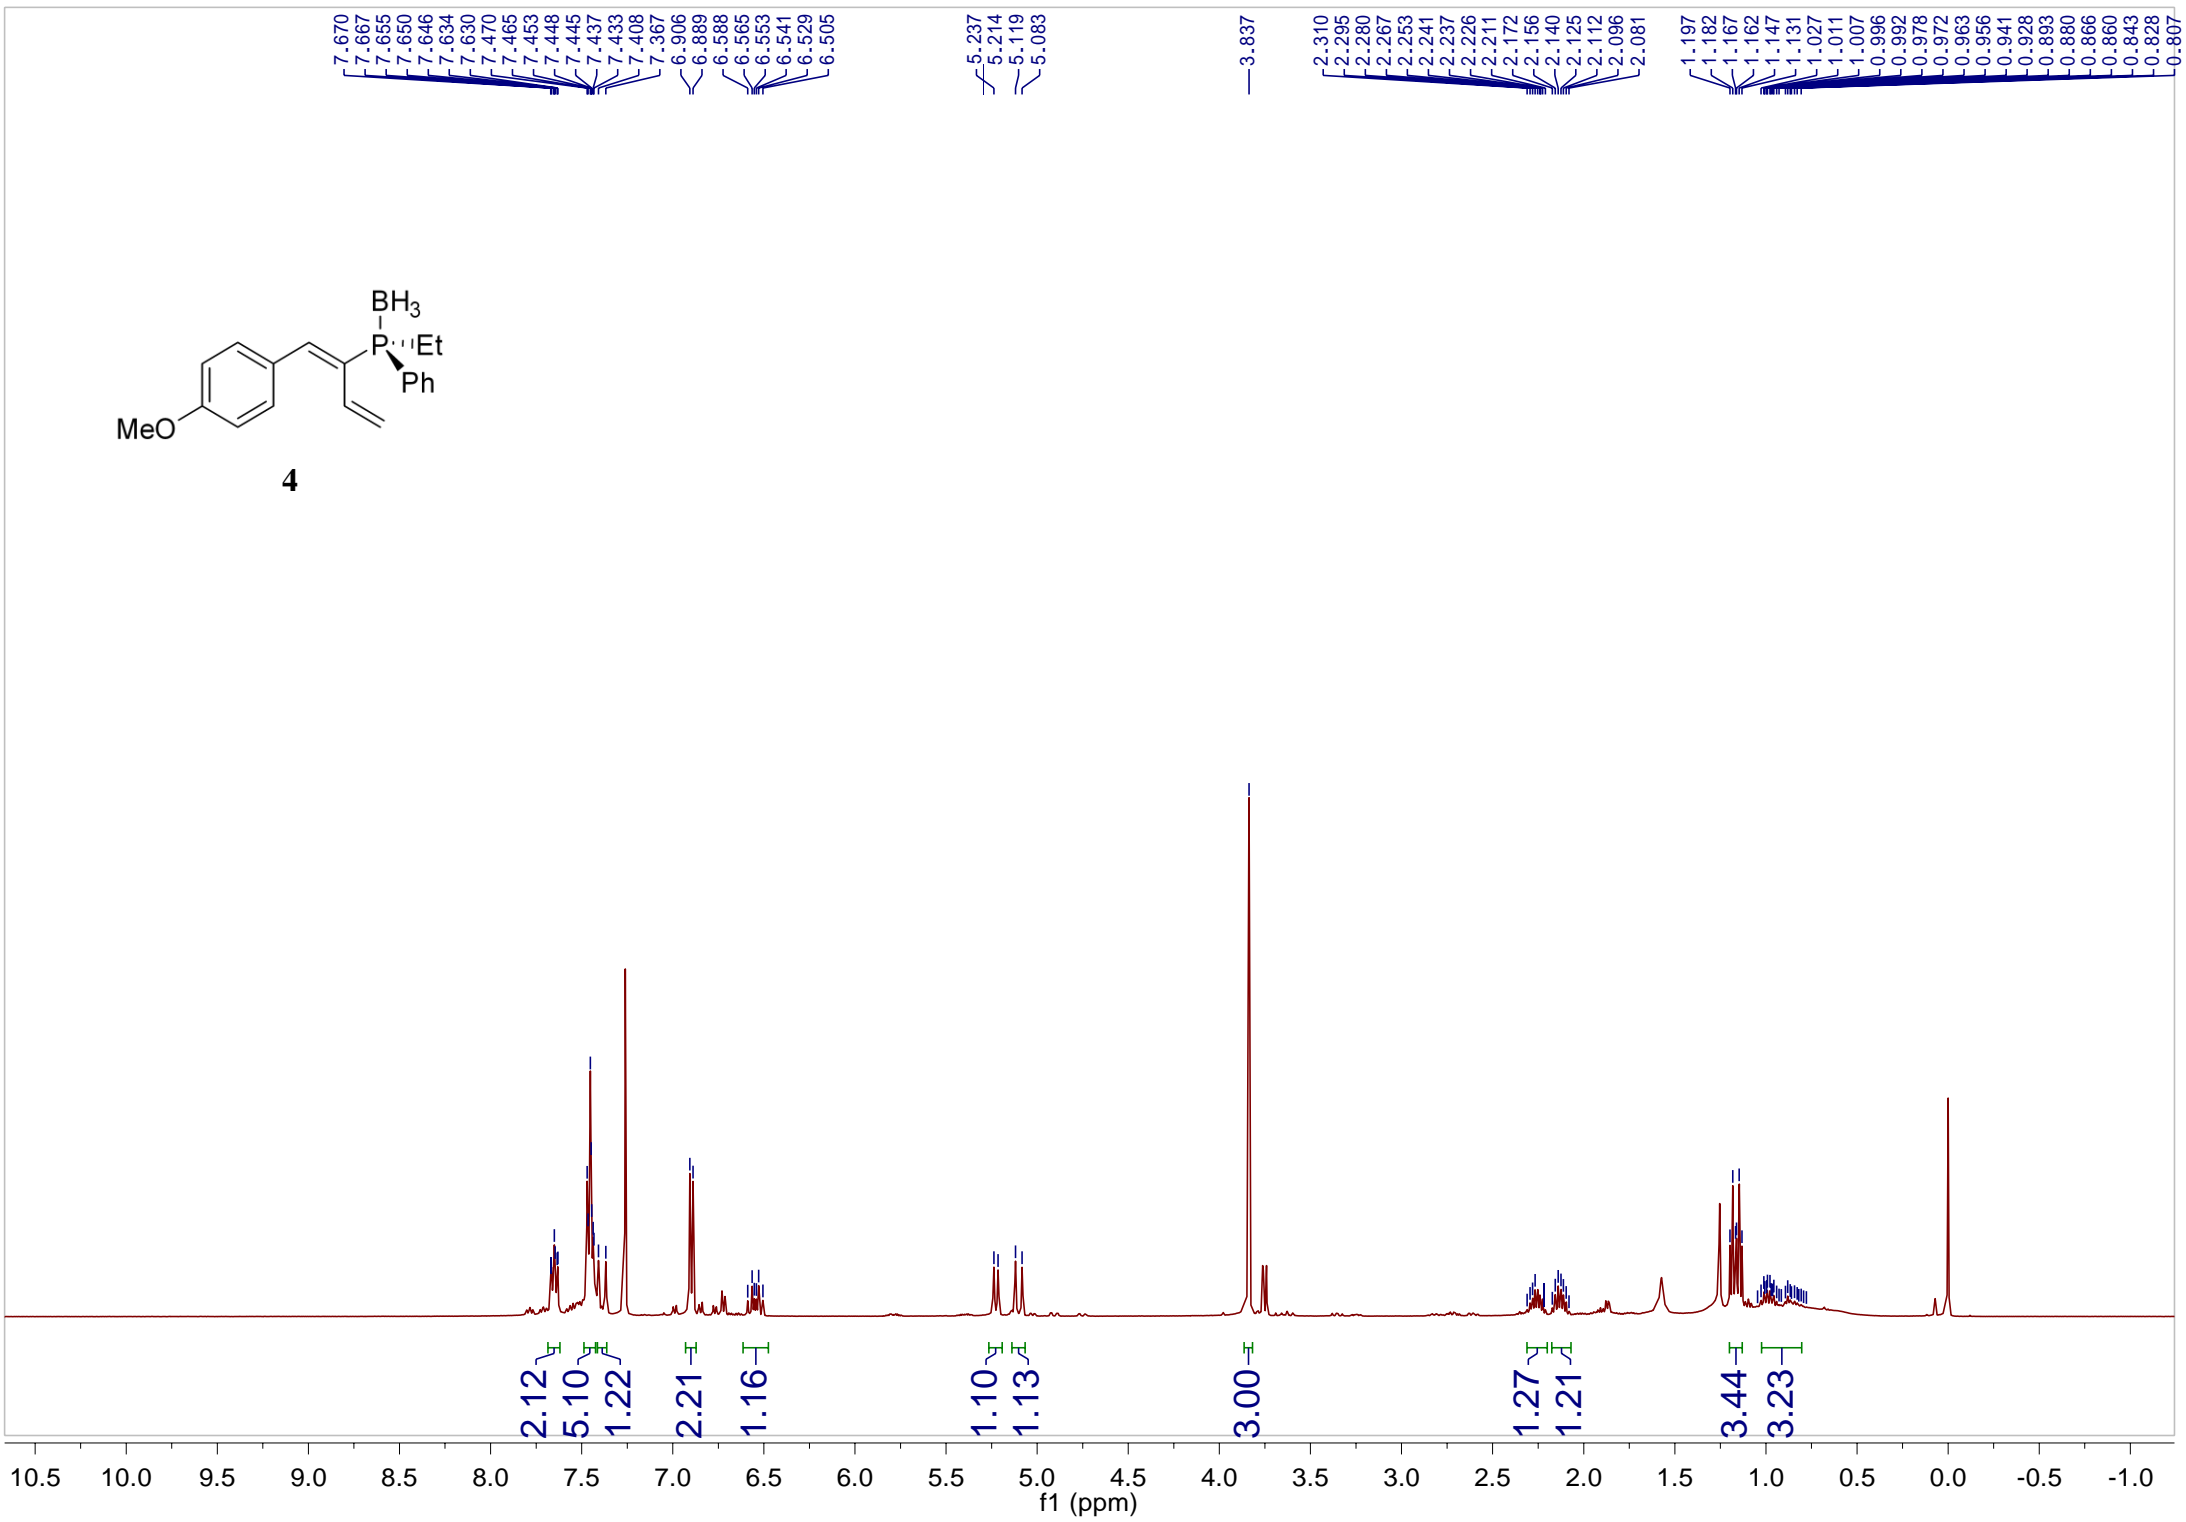

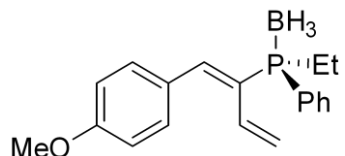

4

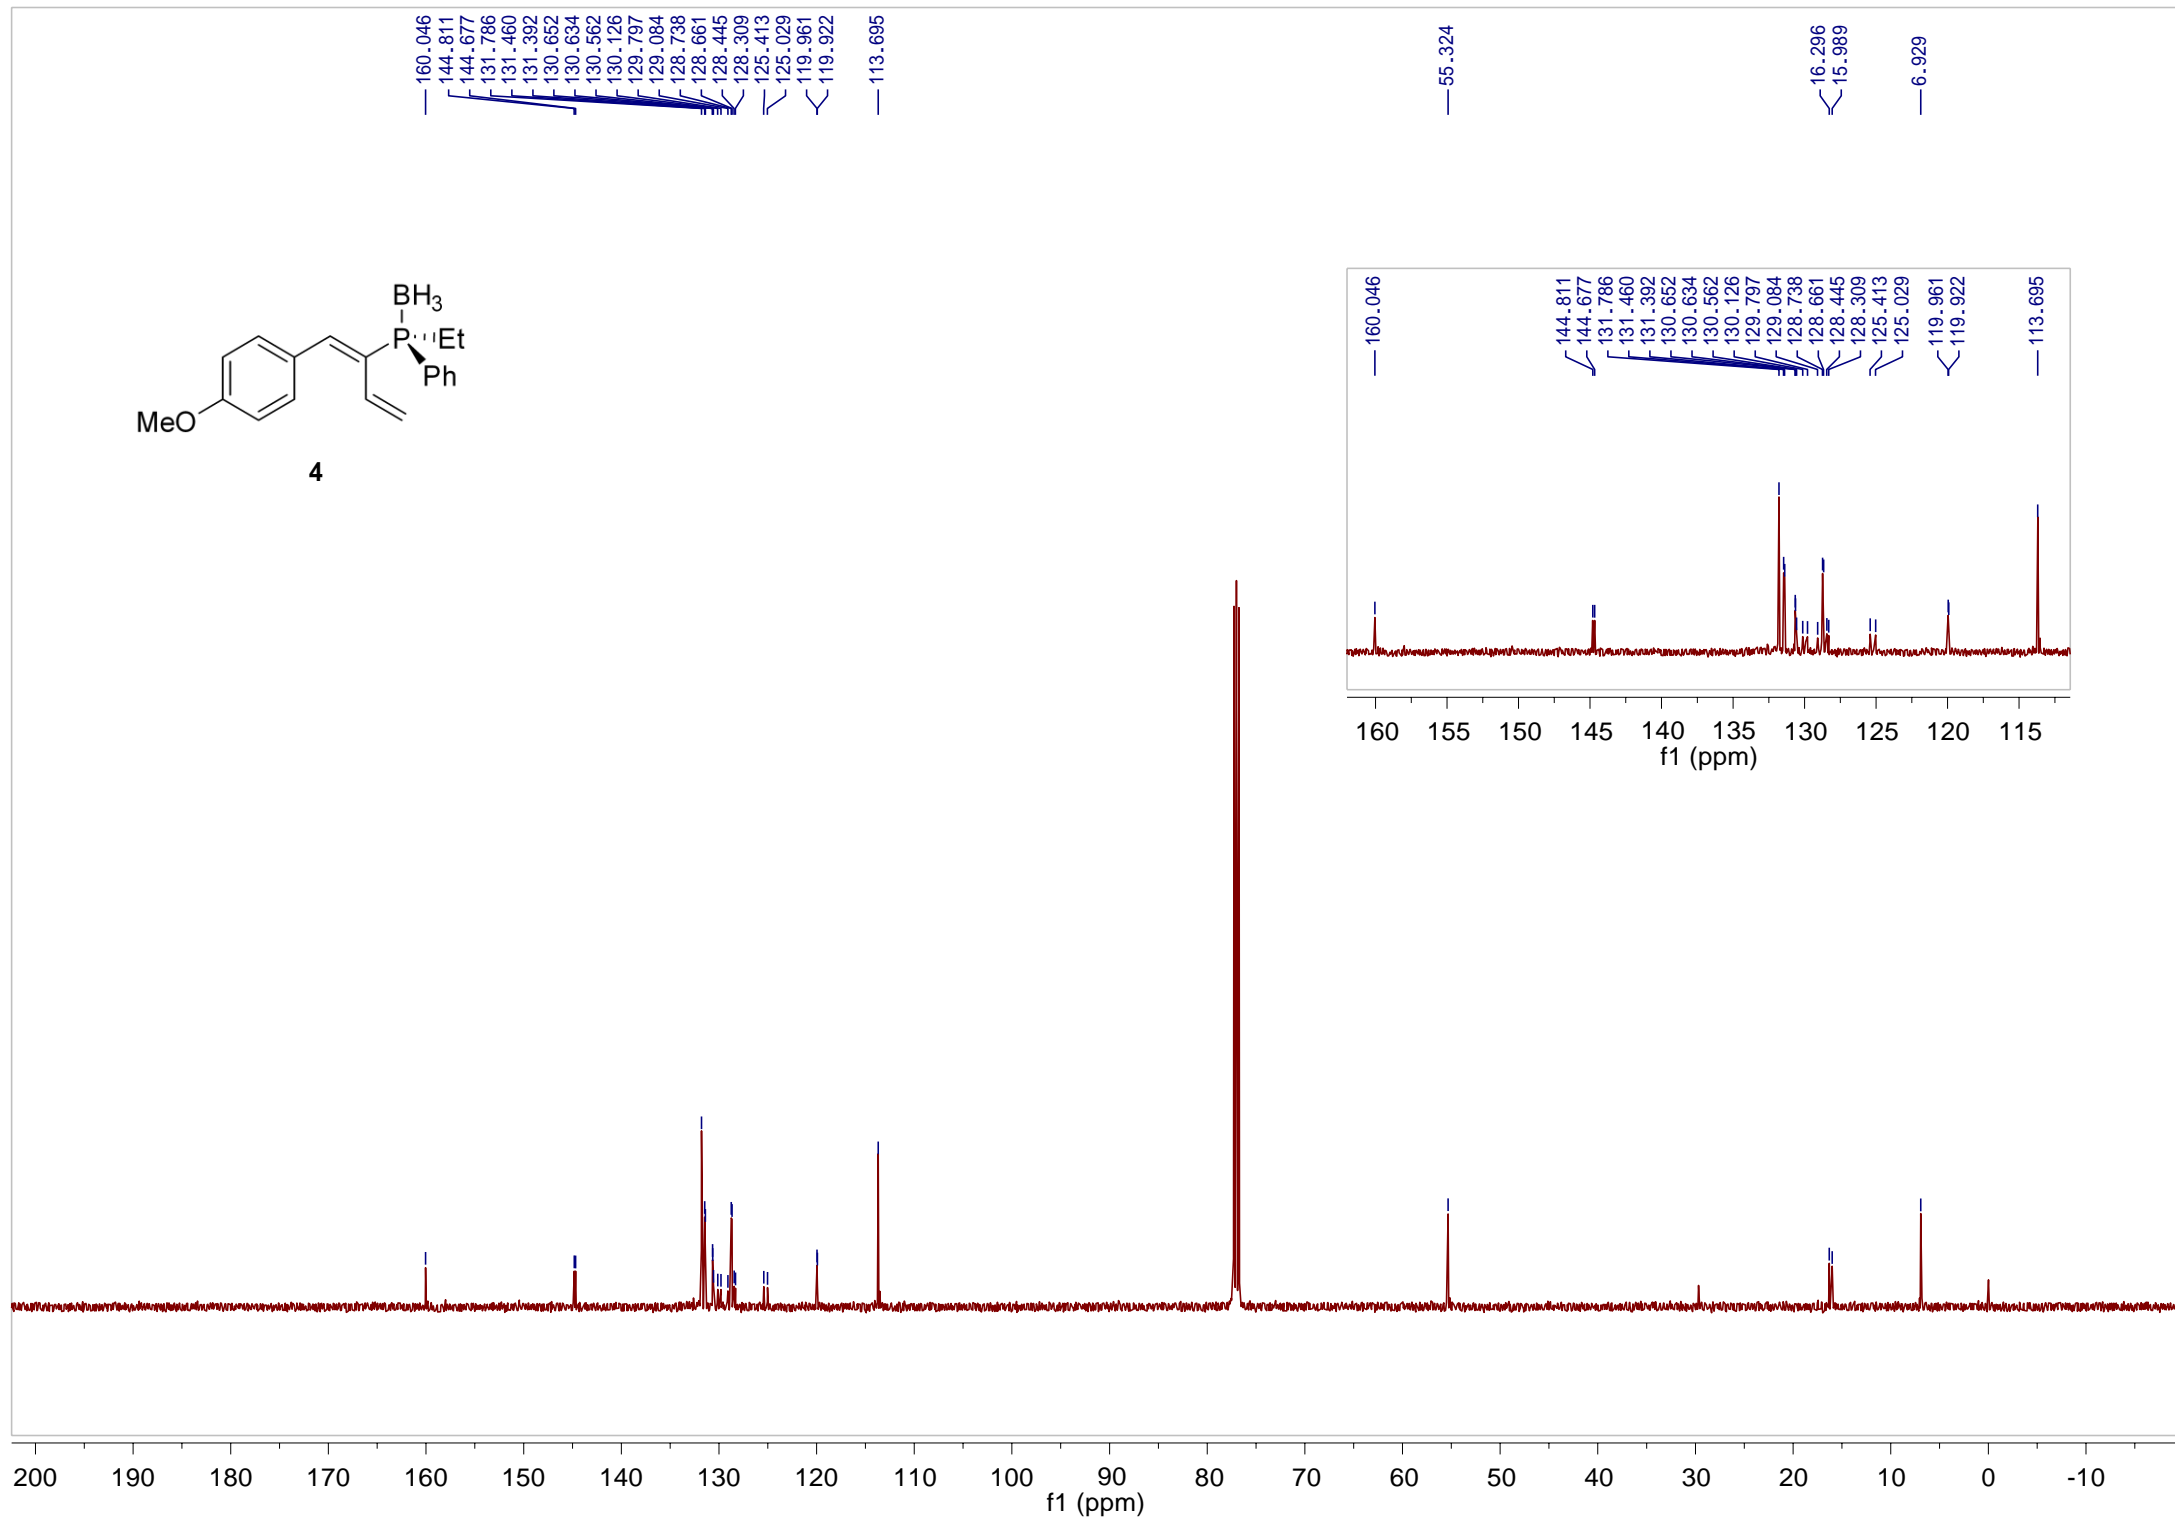

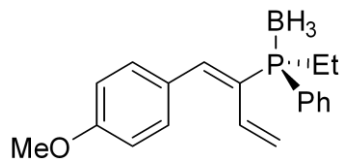

4

24.502  
24.214

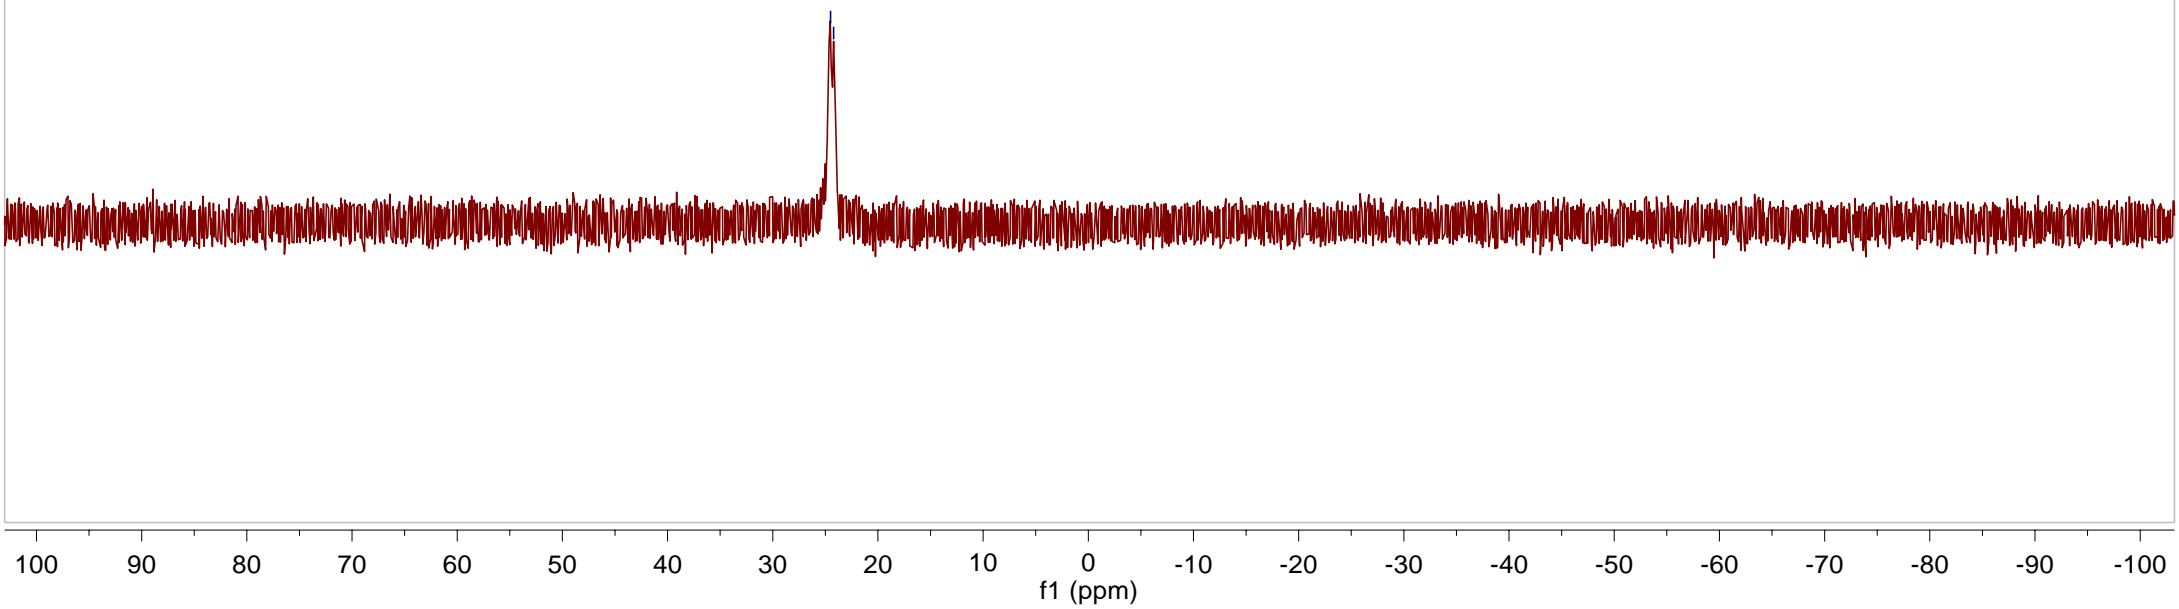

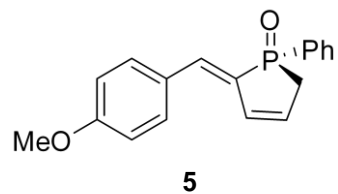

5

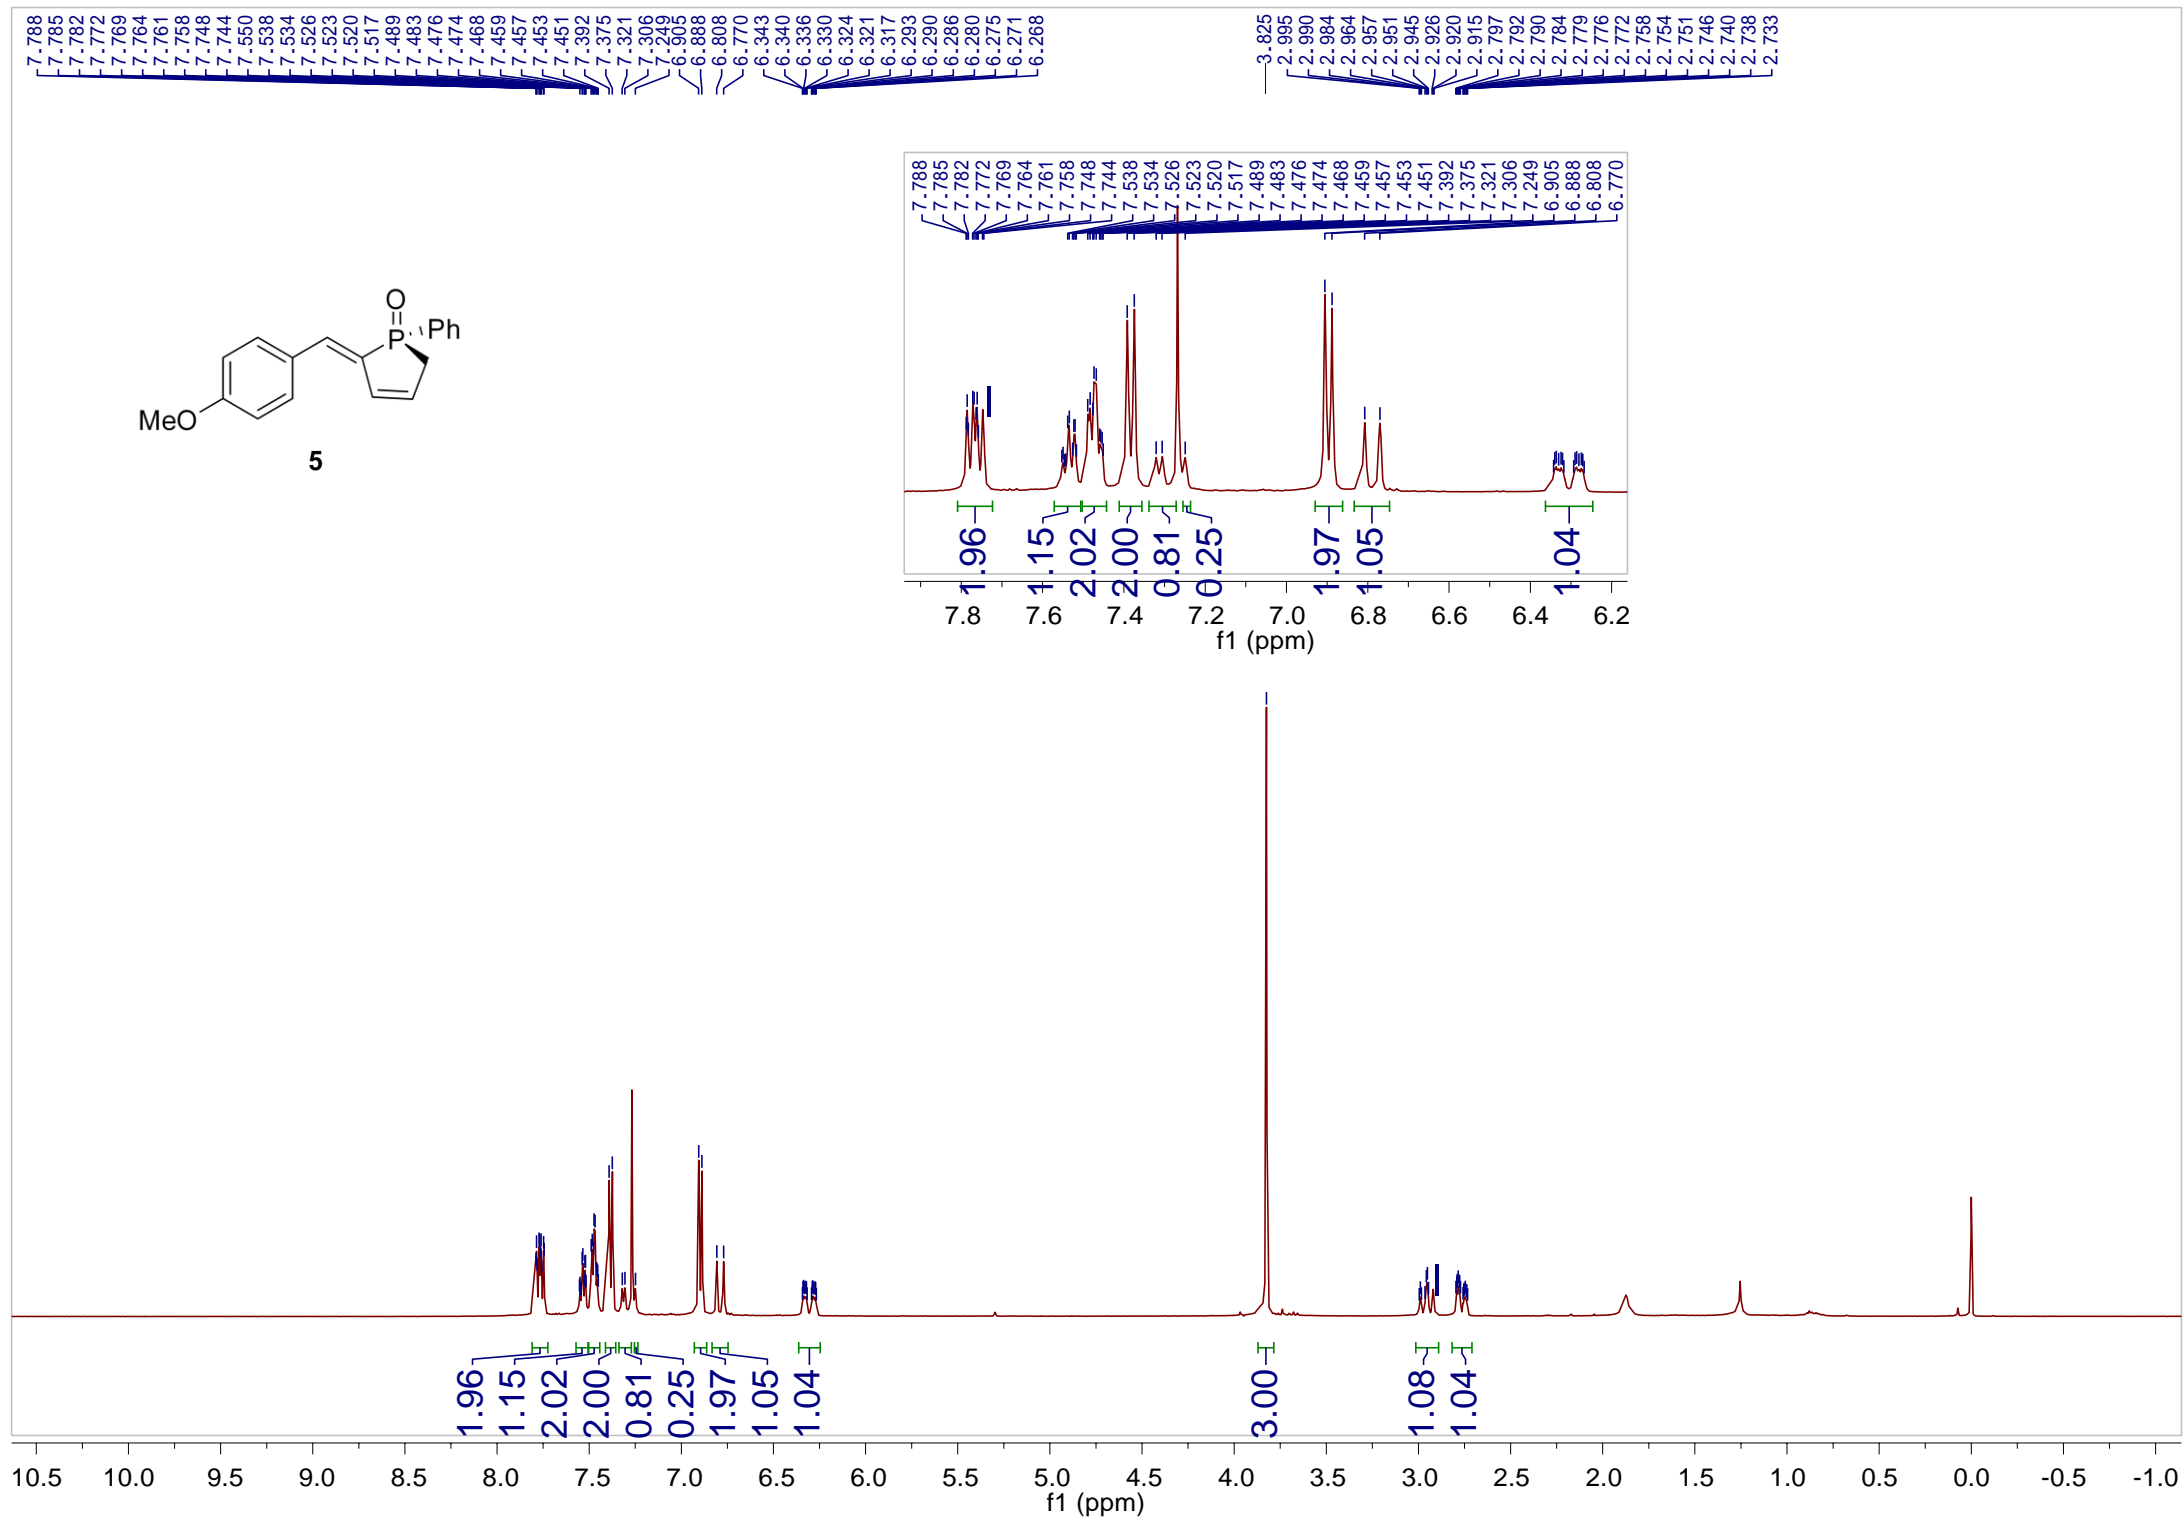

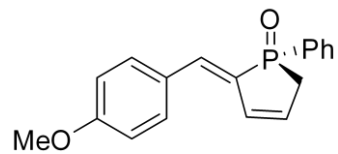

5

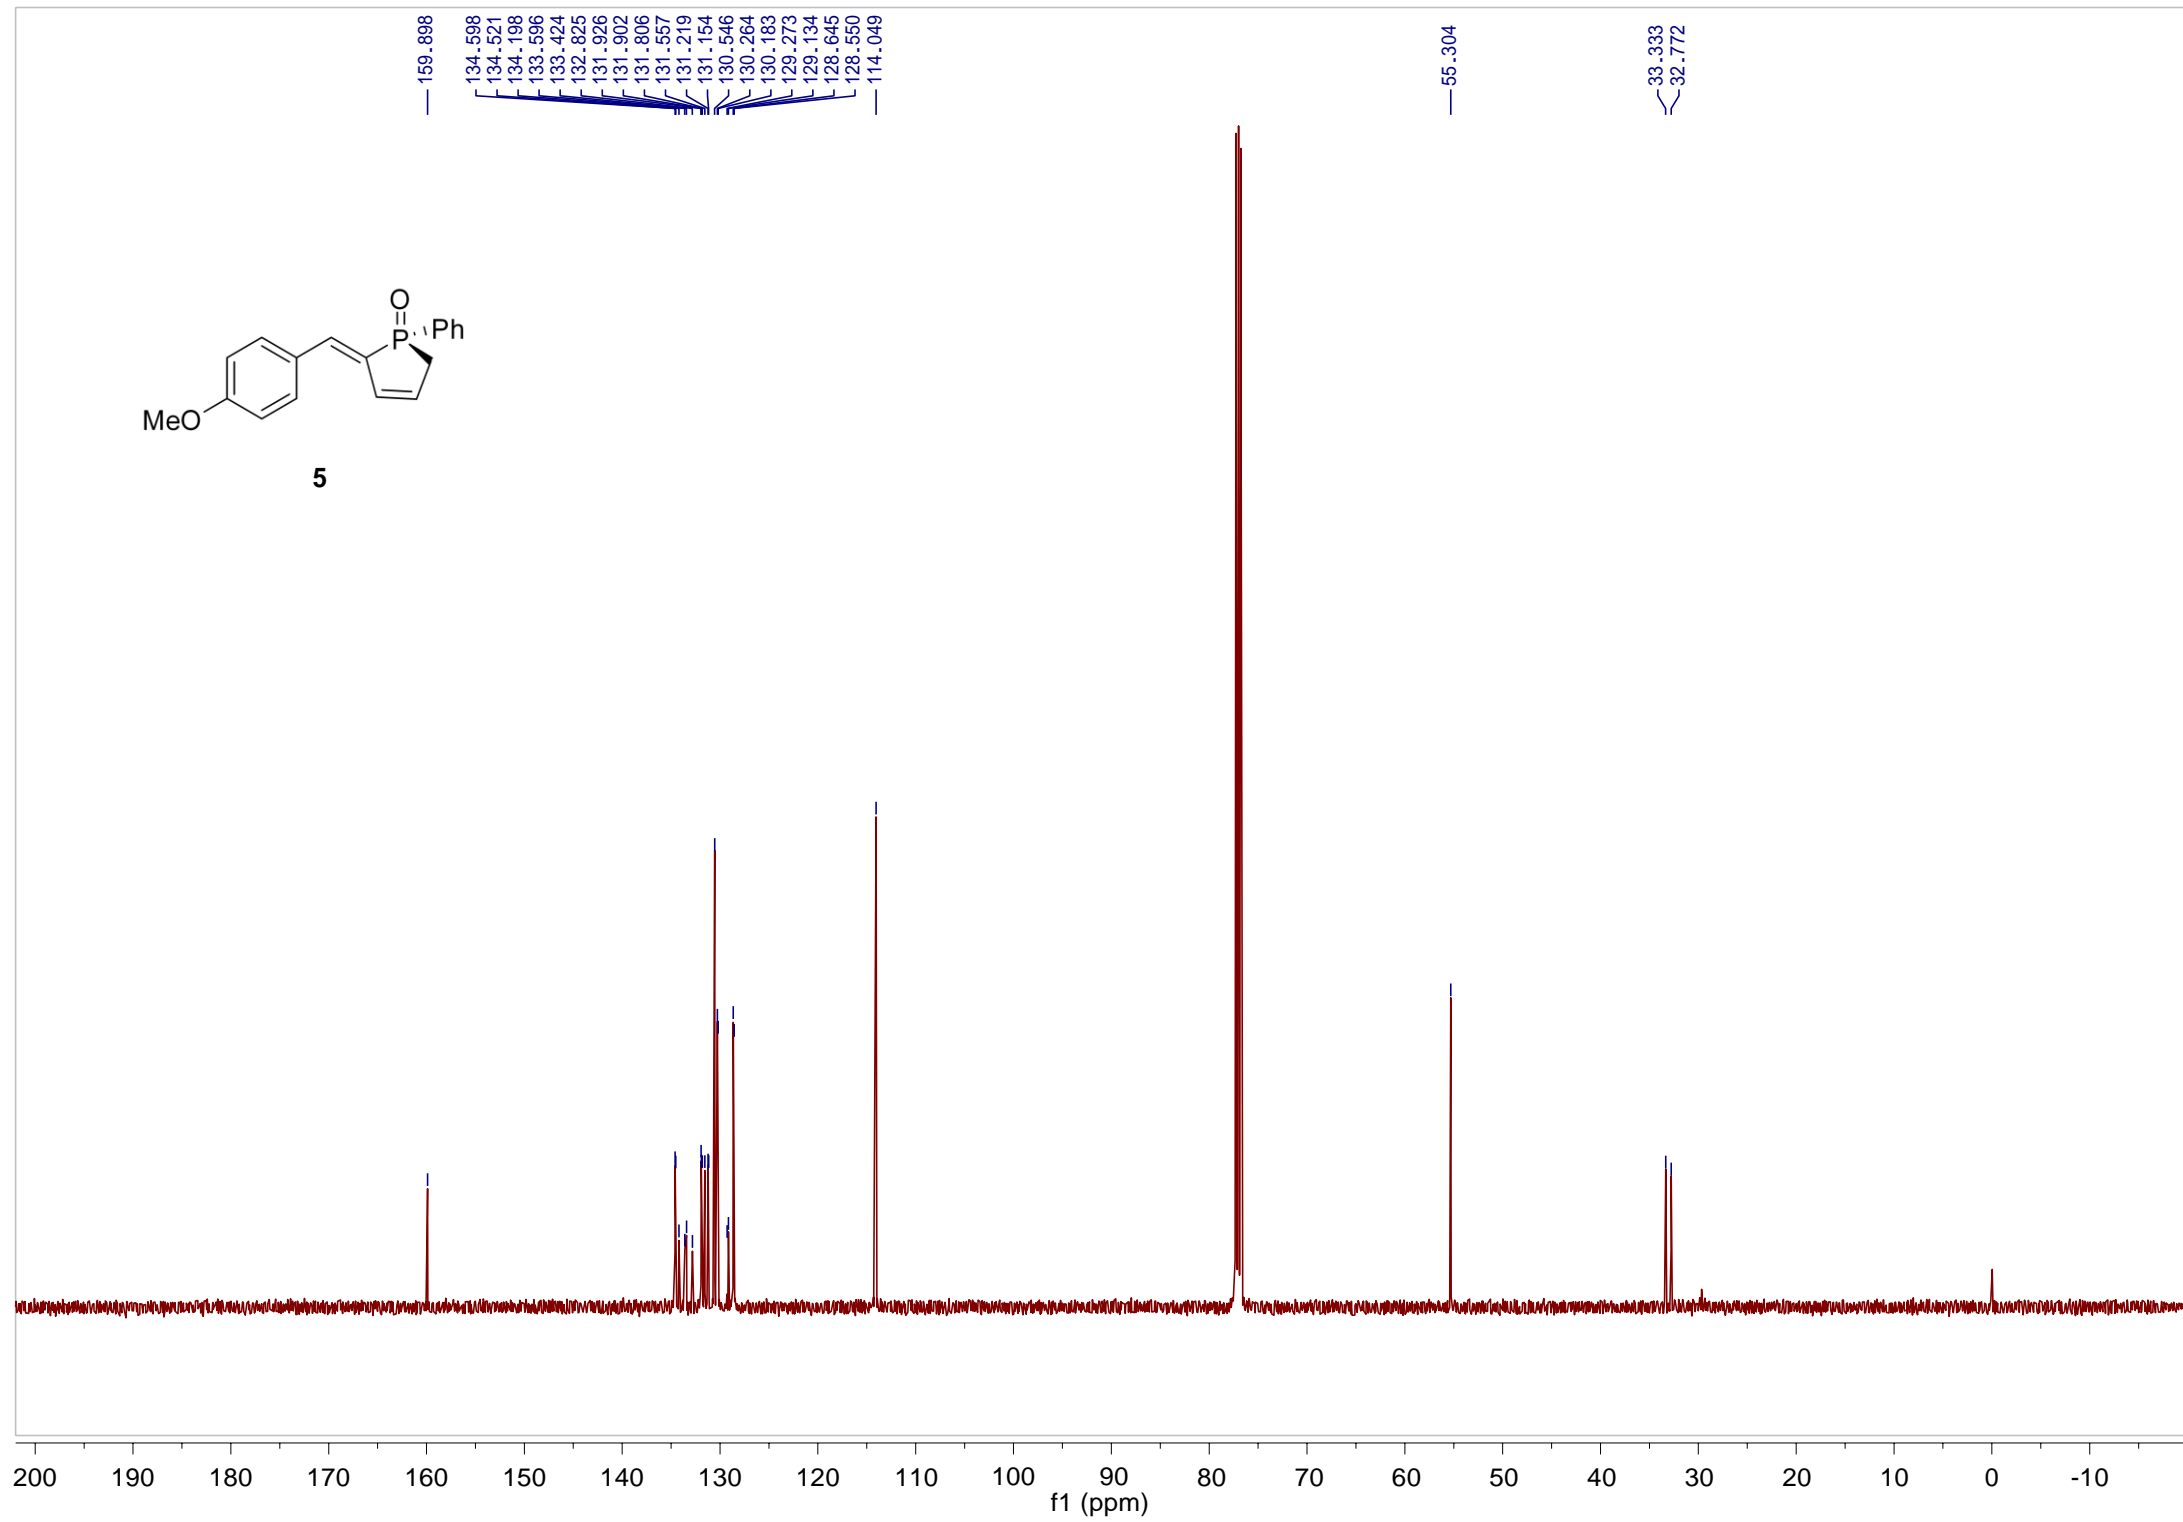

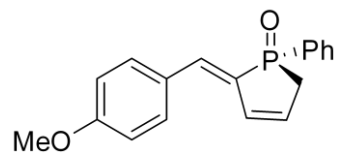

5

—45.359

100 95 90 85 80 75 70 65 60 55 50 45 40 35 30 25 20 15 10 5 0 -5 -10 -15 -20 -25 -30 -35 -40 -45 -50  
f1 (ppm)

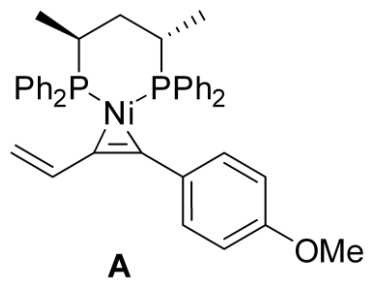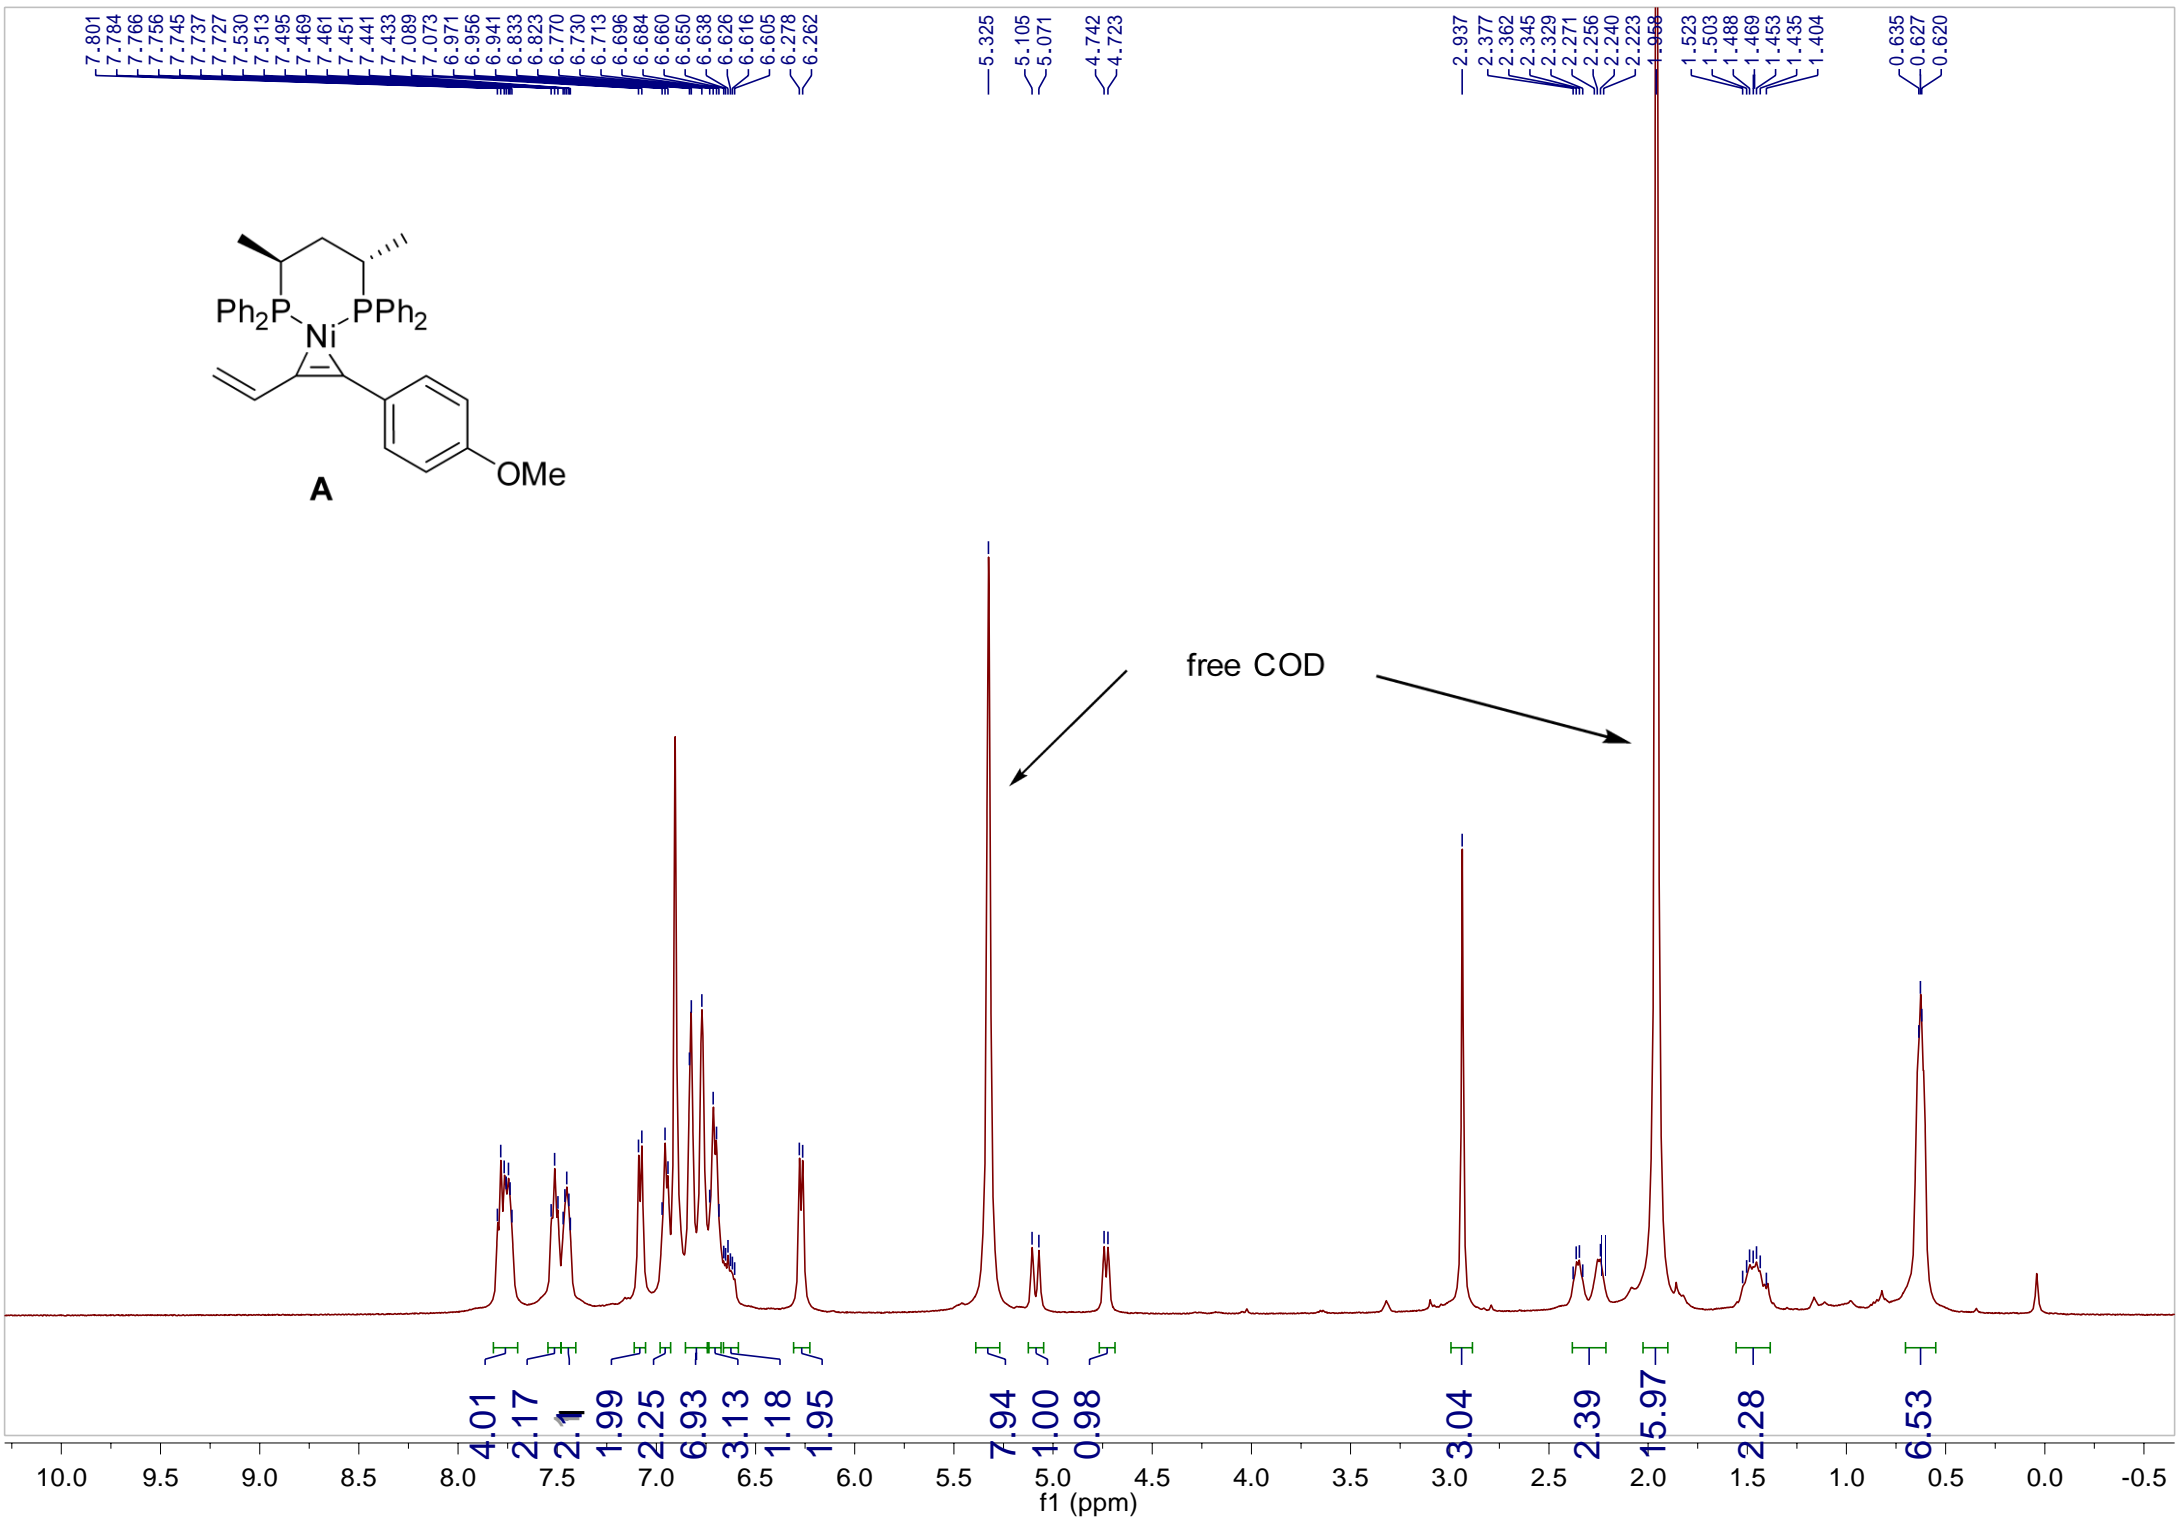

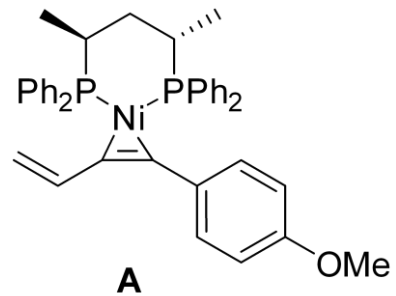

35.635  
35.535  
34.619  
34.520

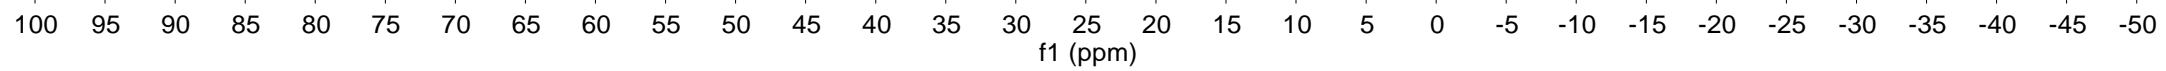



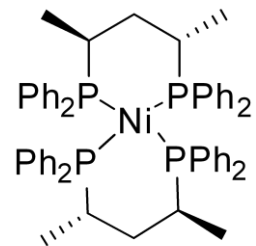

**B**

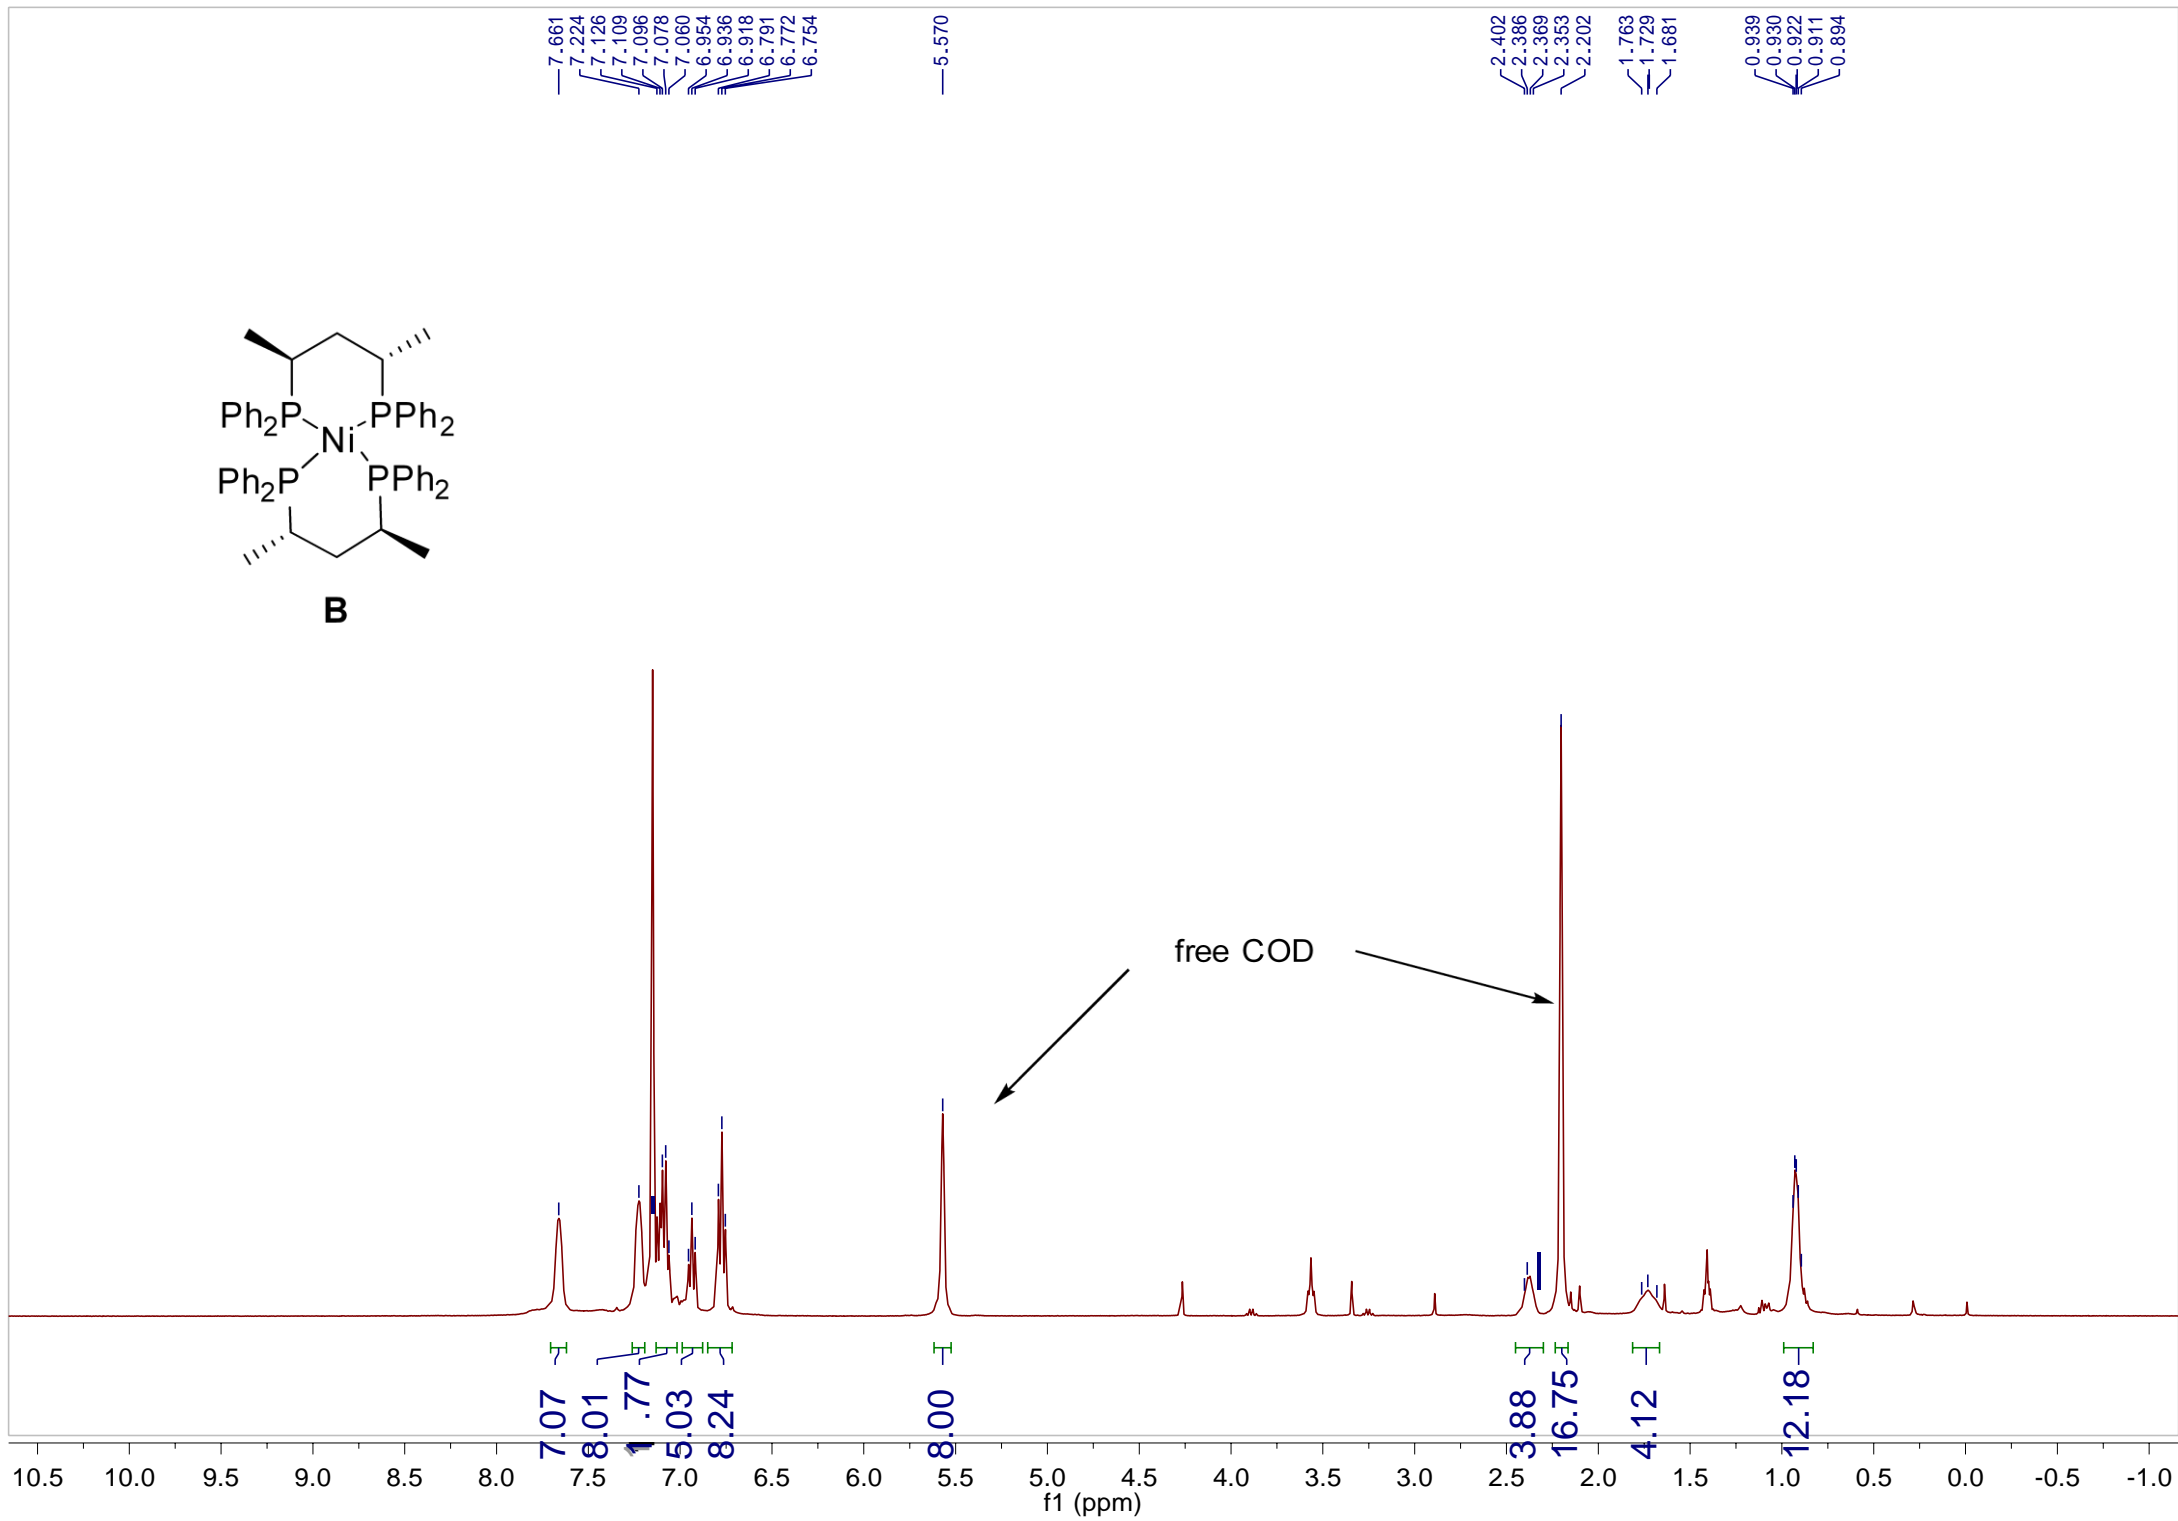

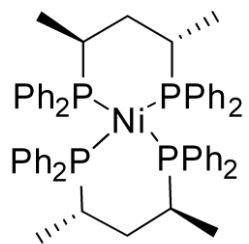

**B**

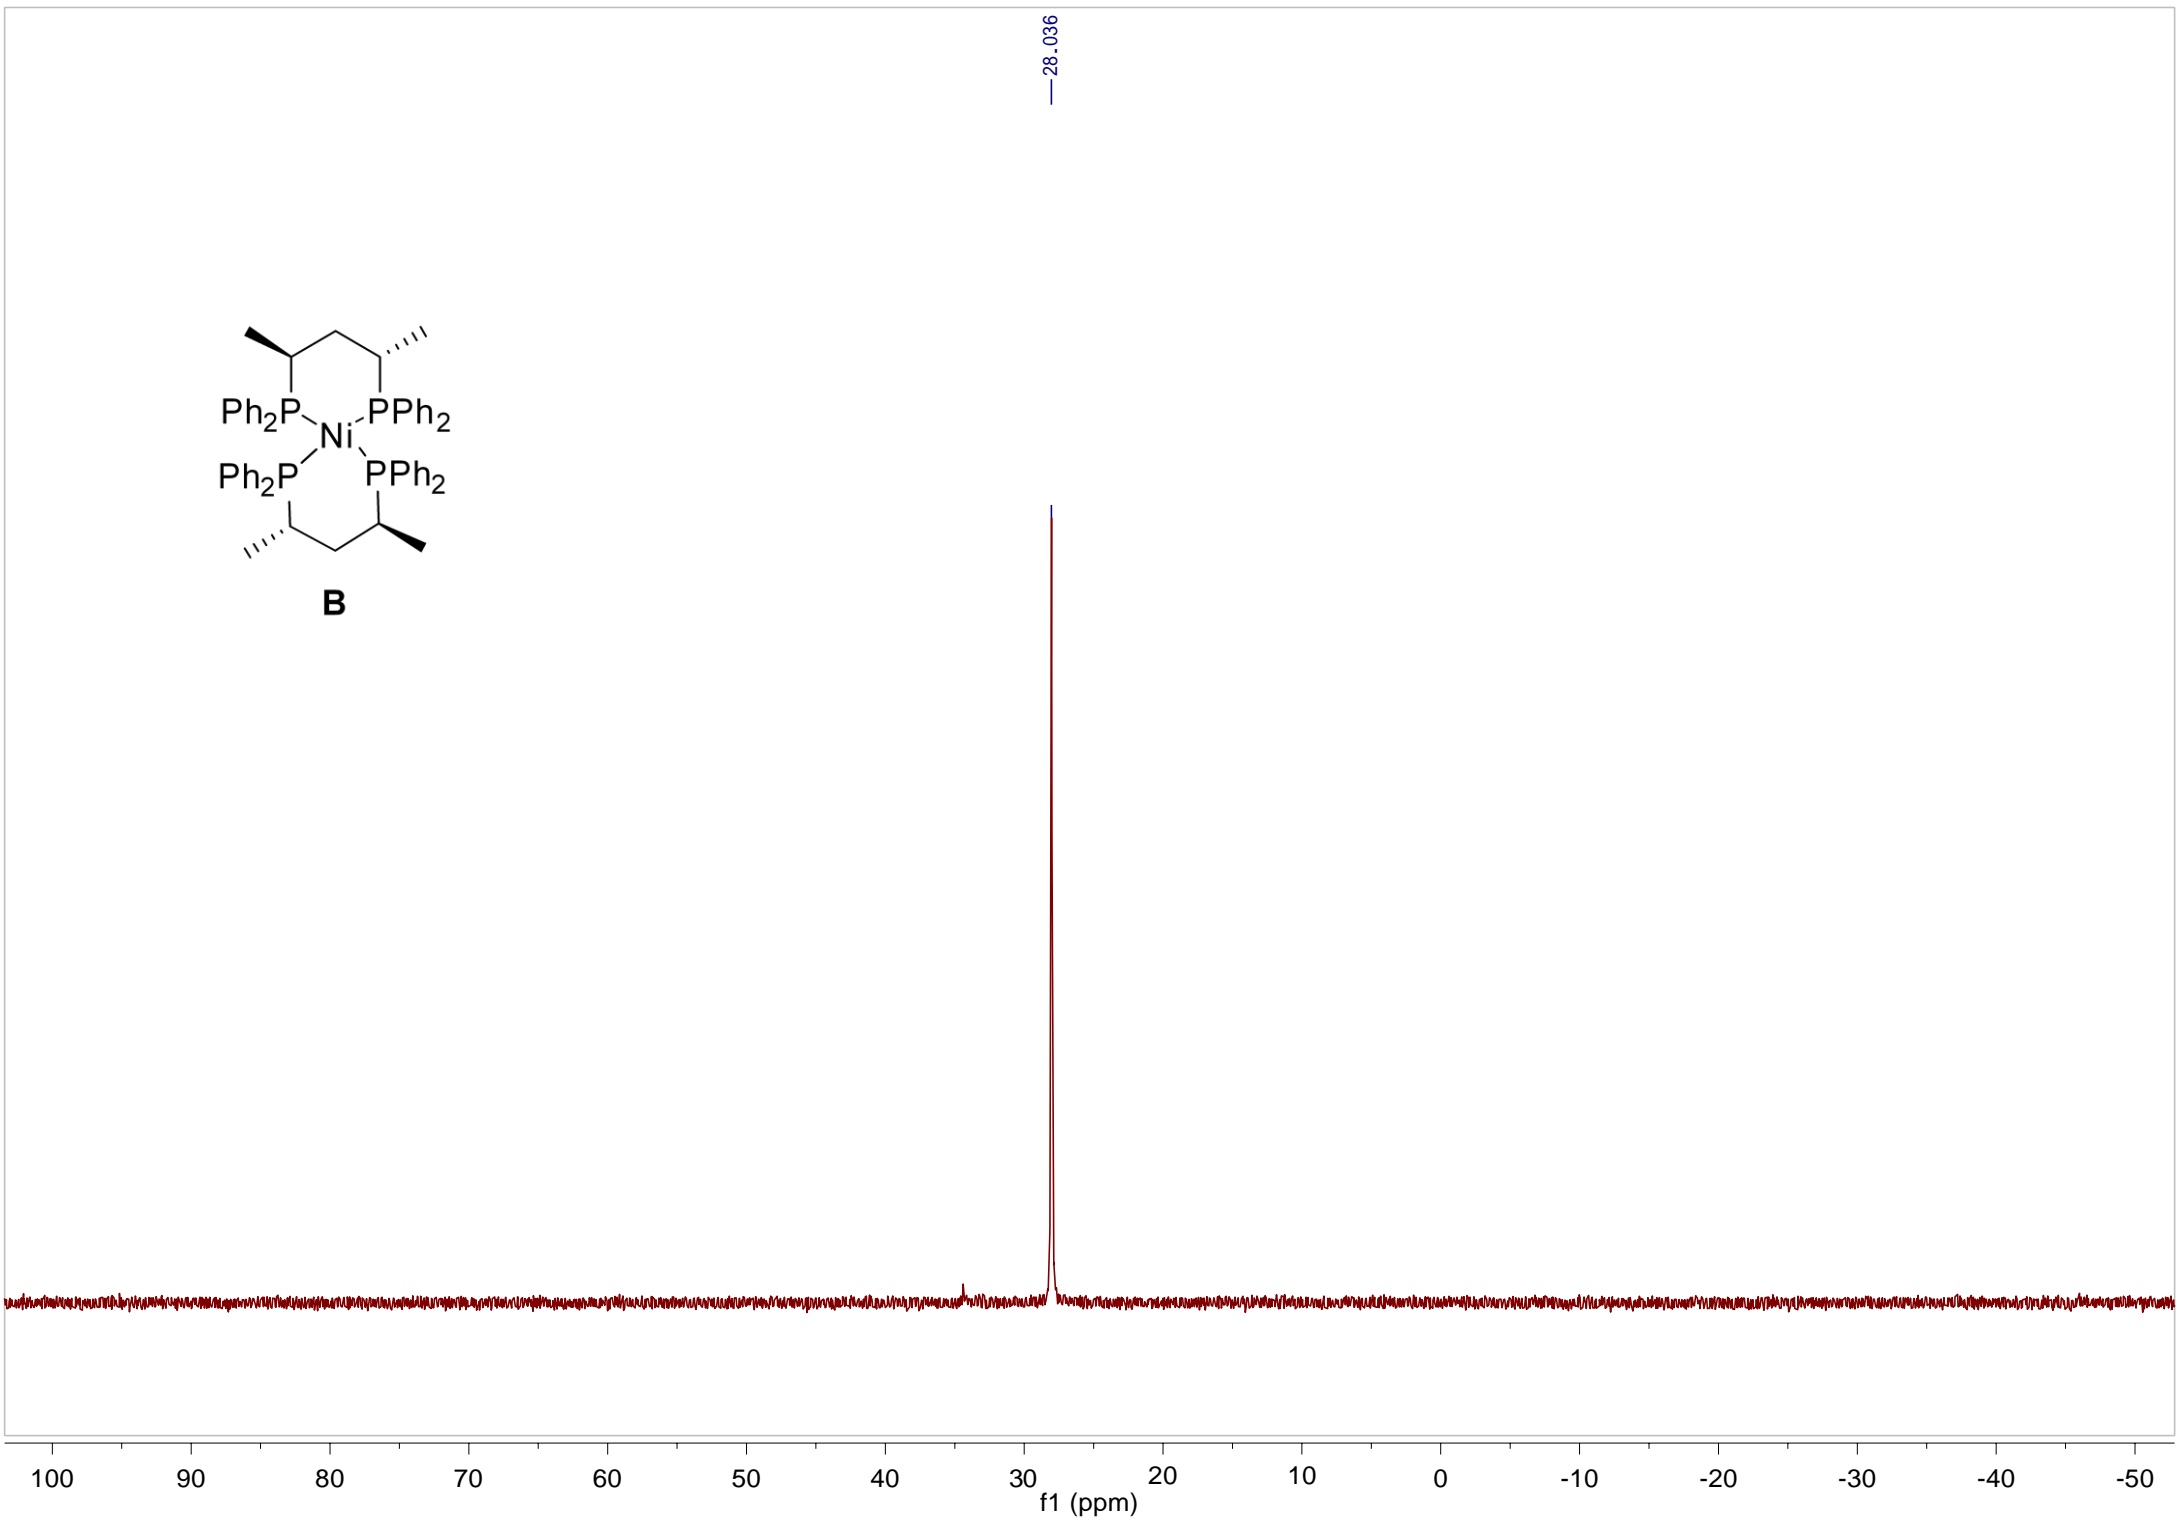

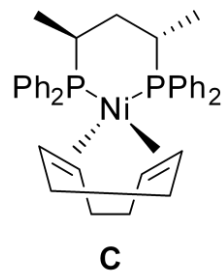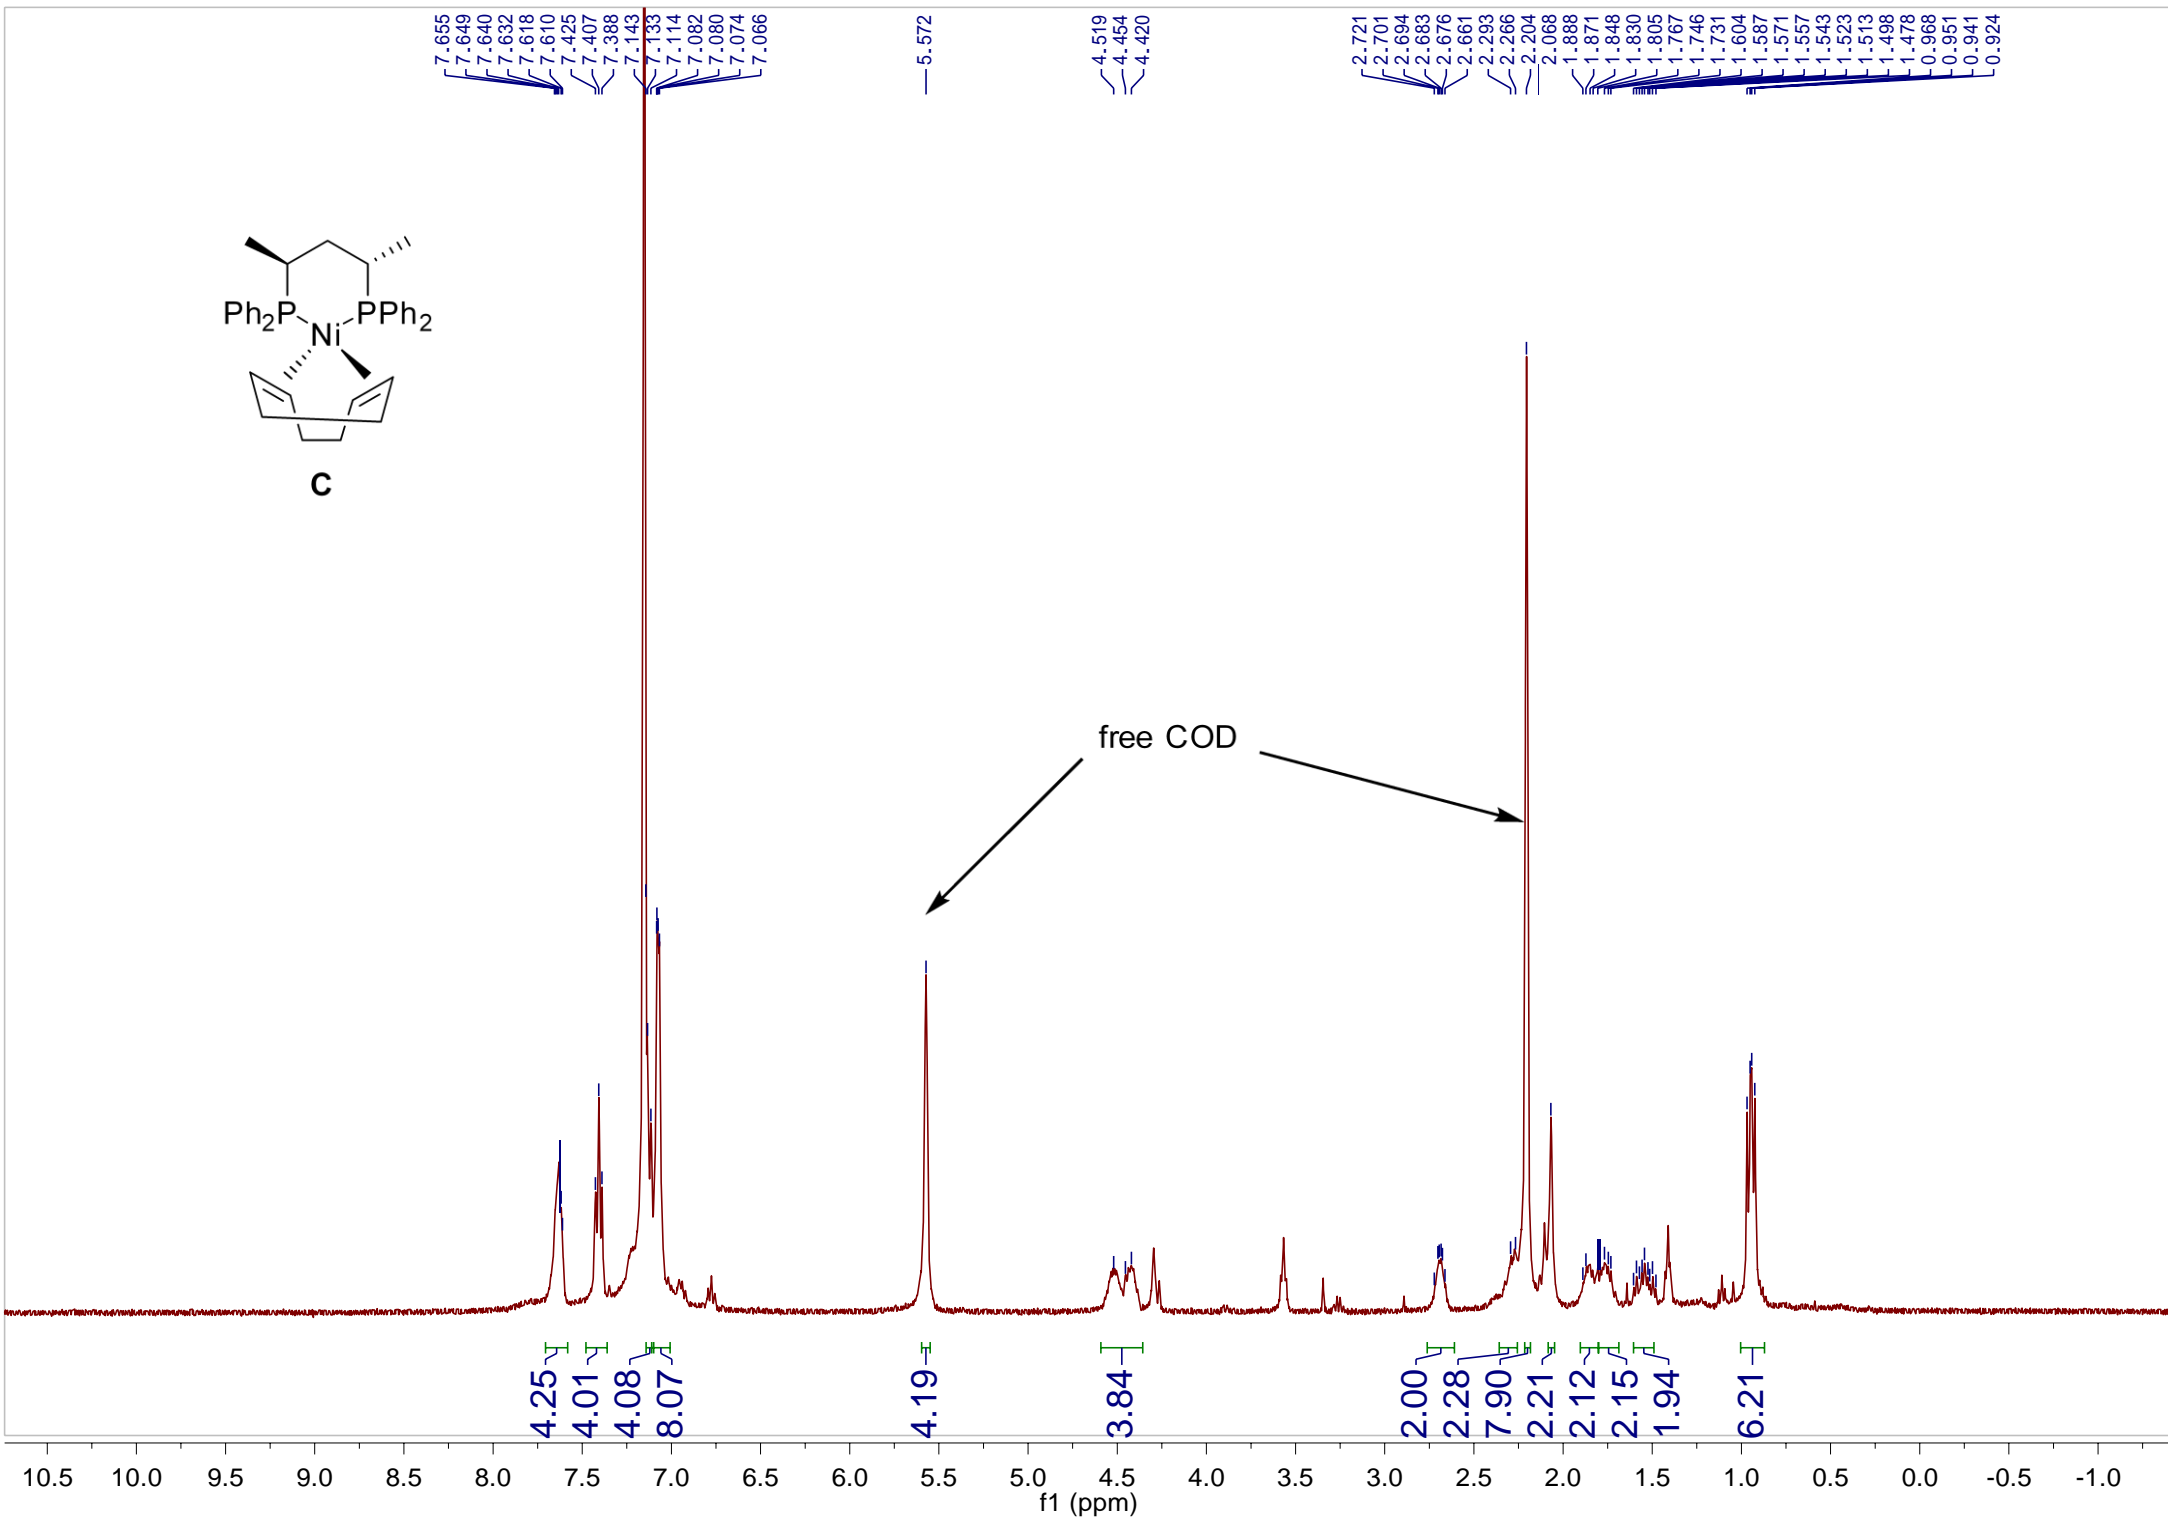

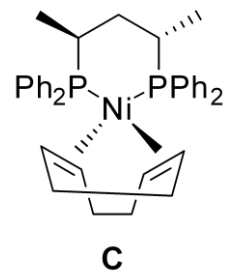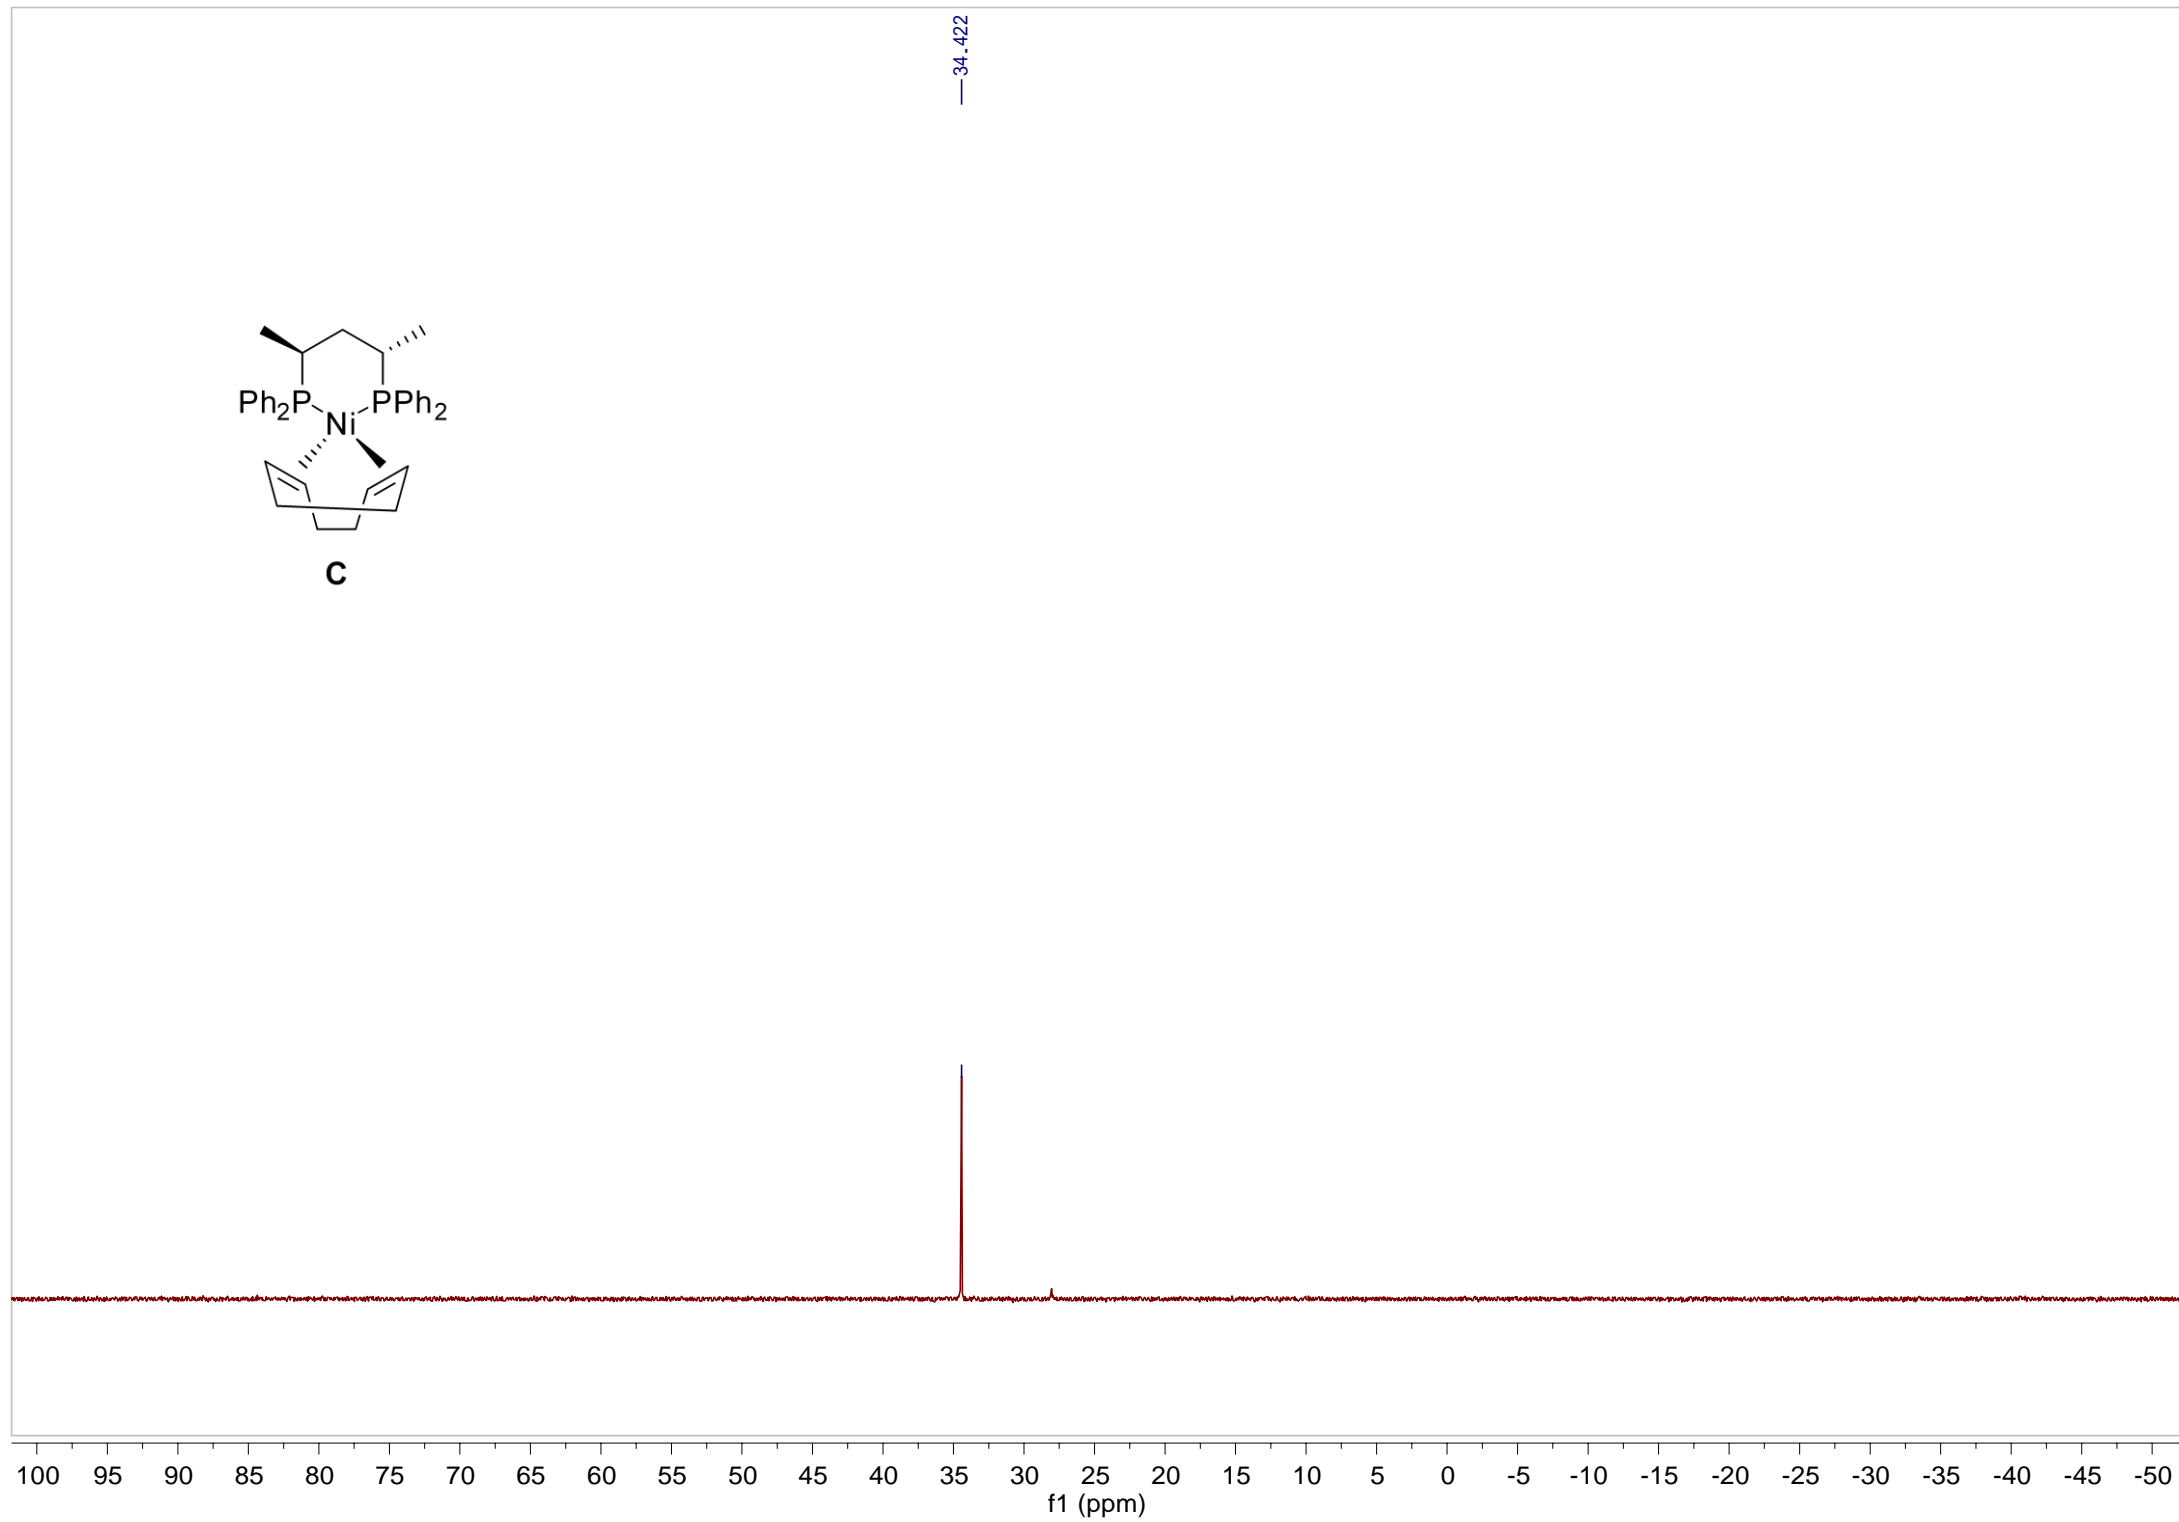

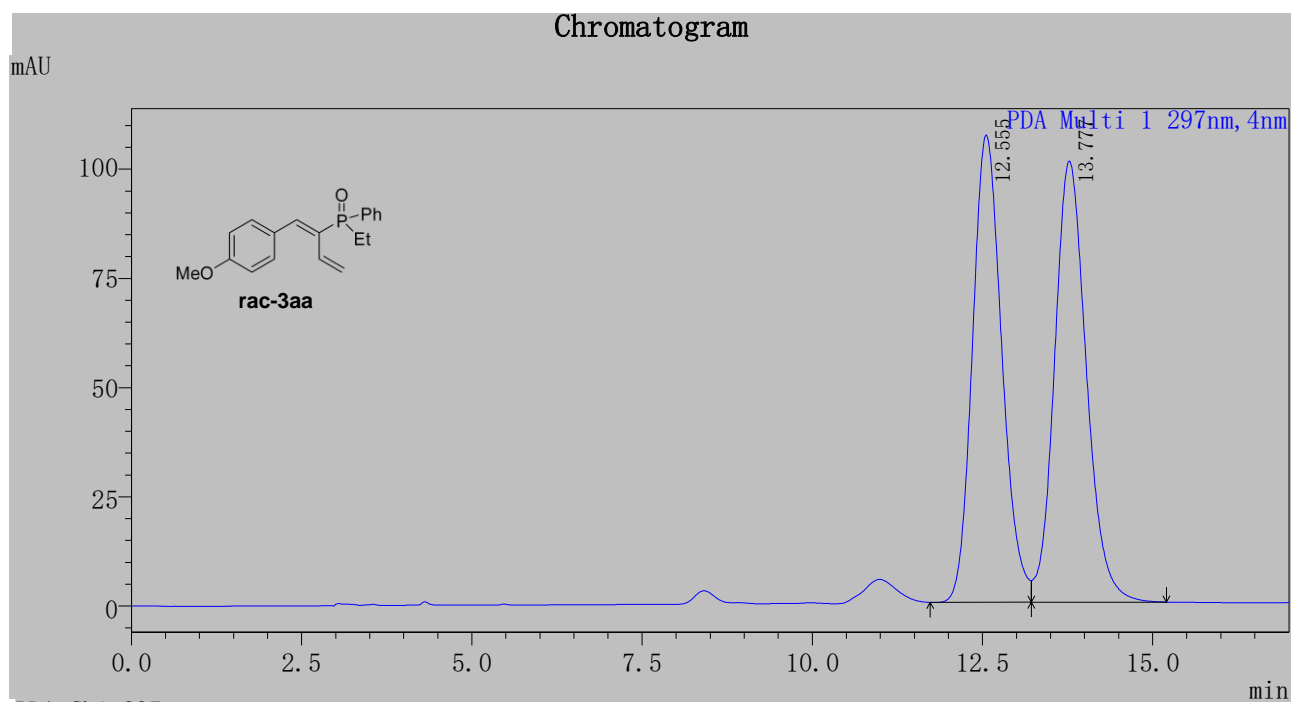

PDA Ch1 297nm

| Peak#        | Ret. Time | Area           | Area%          |
|--------------|-----------|----------------|----------------|
| 1            | 12.555    | 3216473        | 49.388         |
| 2            | 13.777    | 3296123        | 50.612         |
| <b>Total</b> |           | <b>6512596</b> | <b>100.000</b> |

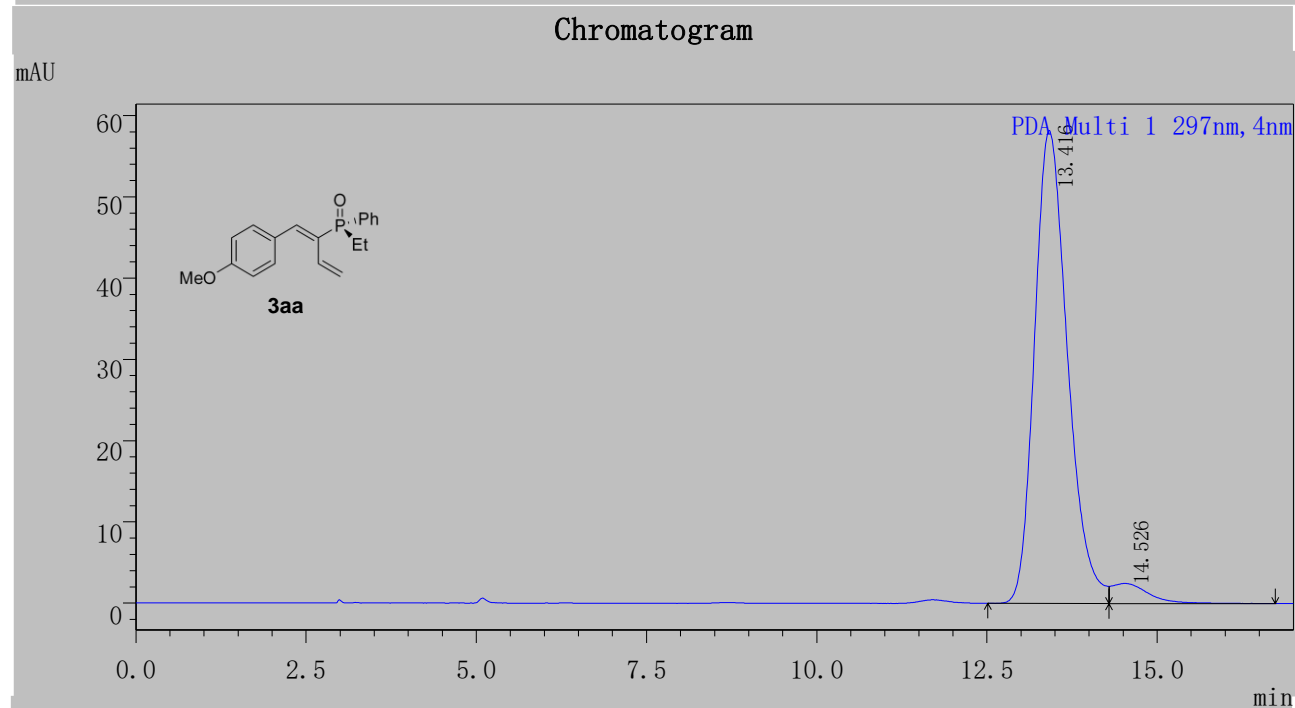

PDA Ch1 297nm

| Peak#        | Ret. Time | Area           | Area%          |
|--------------|-----------|----------------|----------------|
| 1            | 13.416    | 1965438        | 95.503         |
| 2            | 14.526    | 92551          | 4.497          |
| <b>Total</b> |           | <b>2057989</b> | <b>100.000</b> |

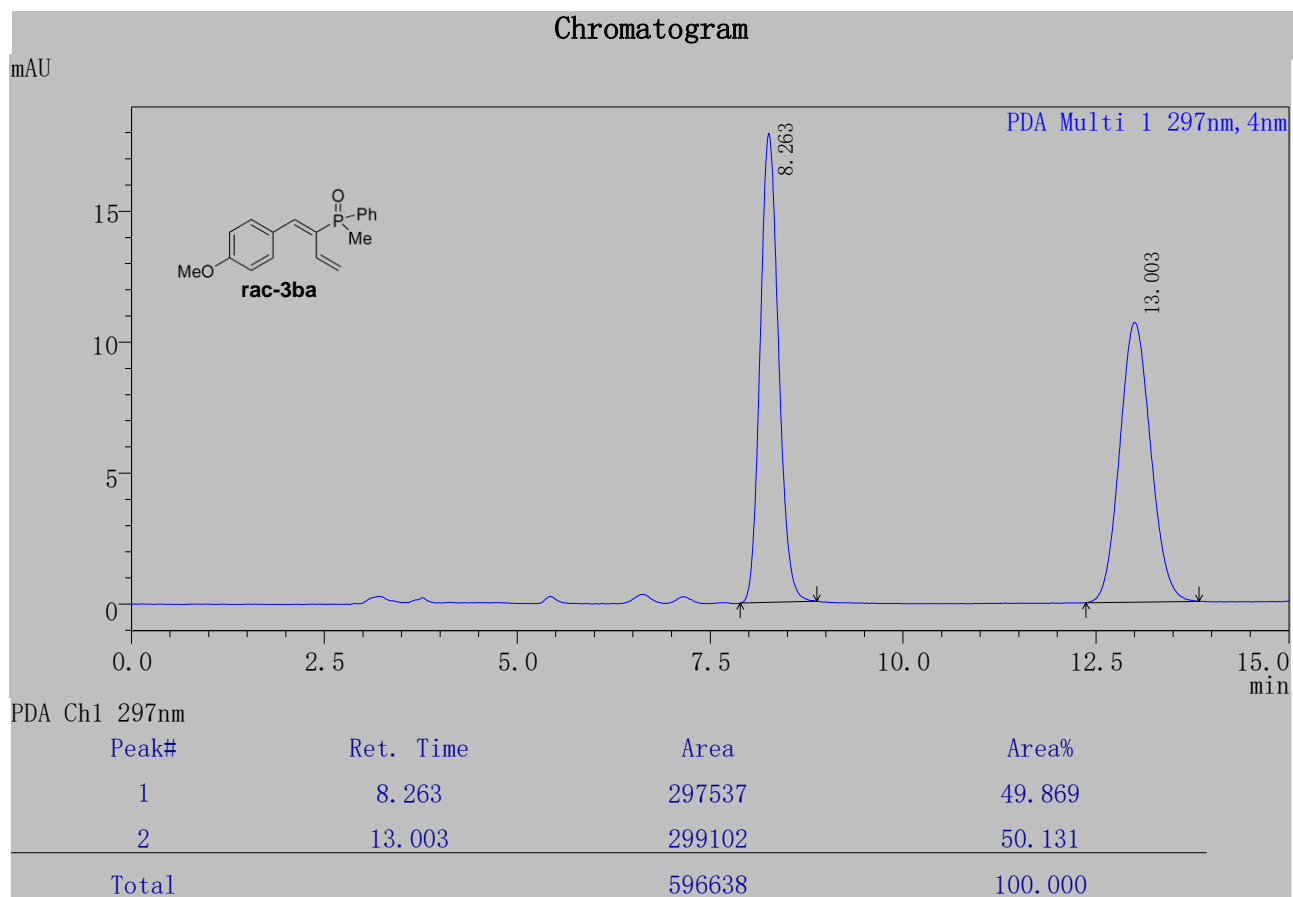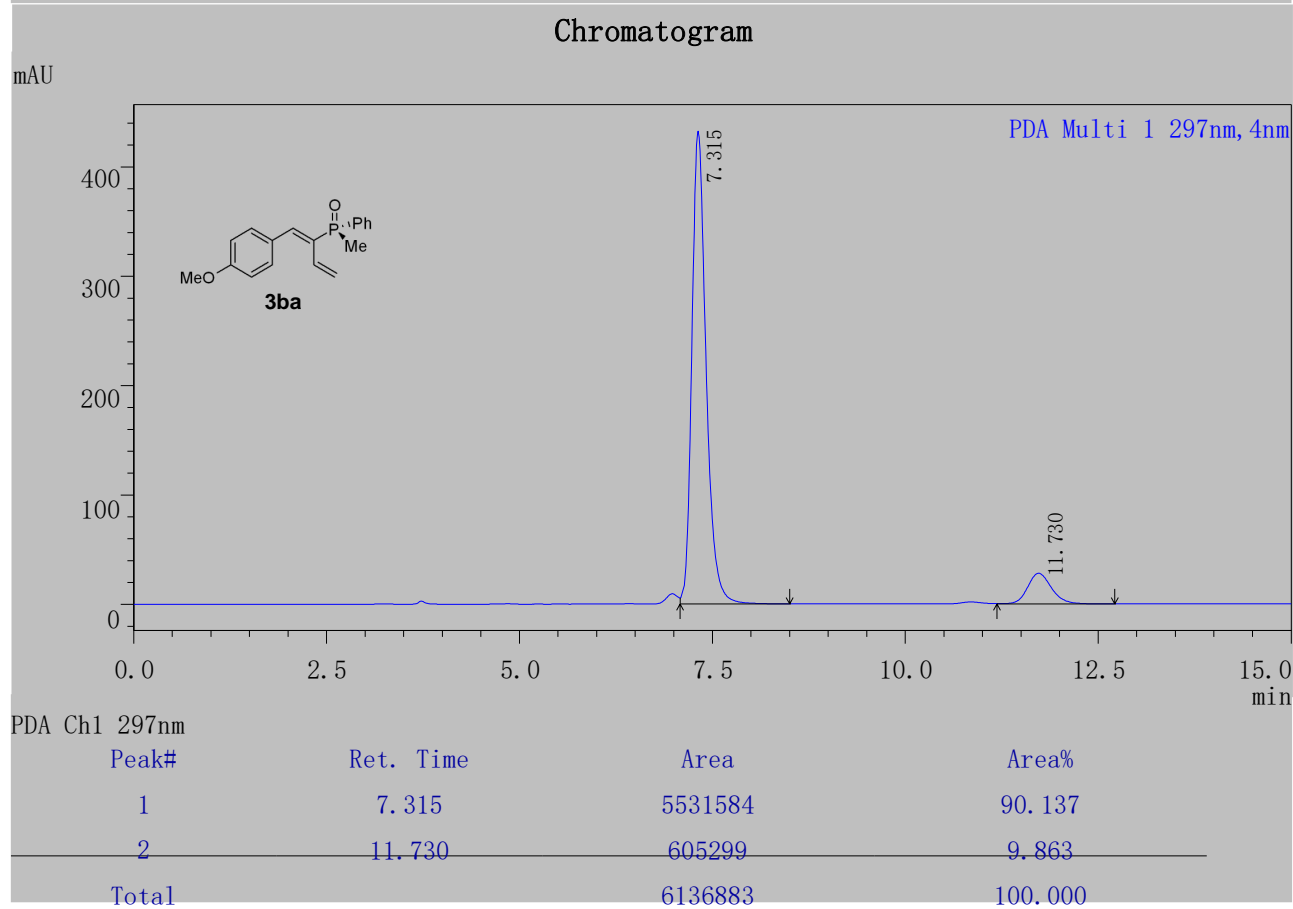

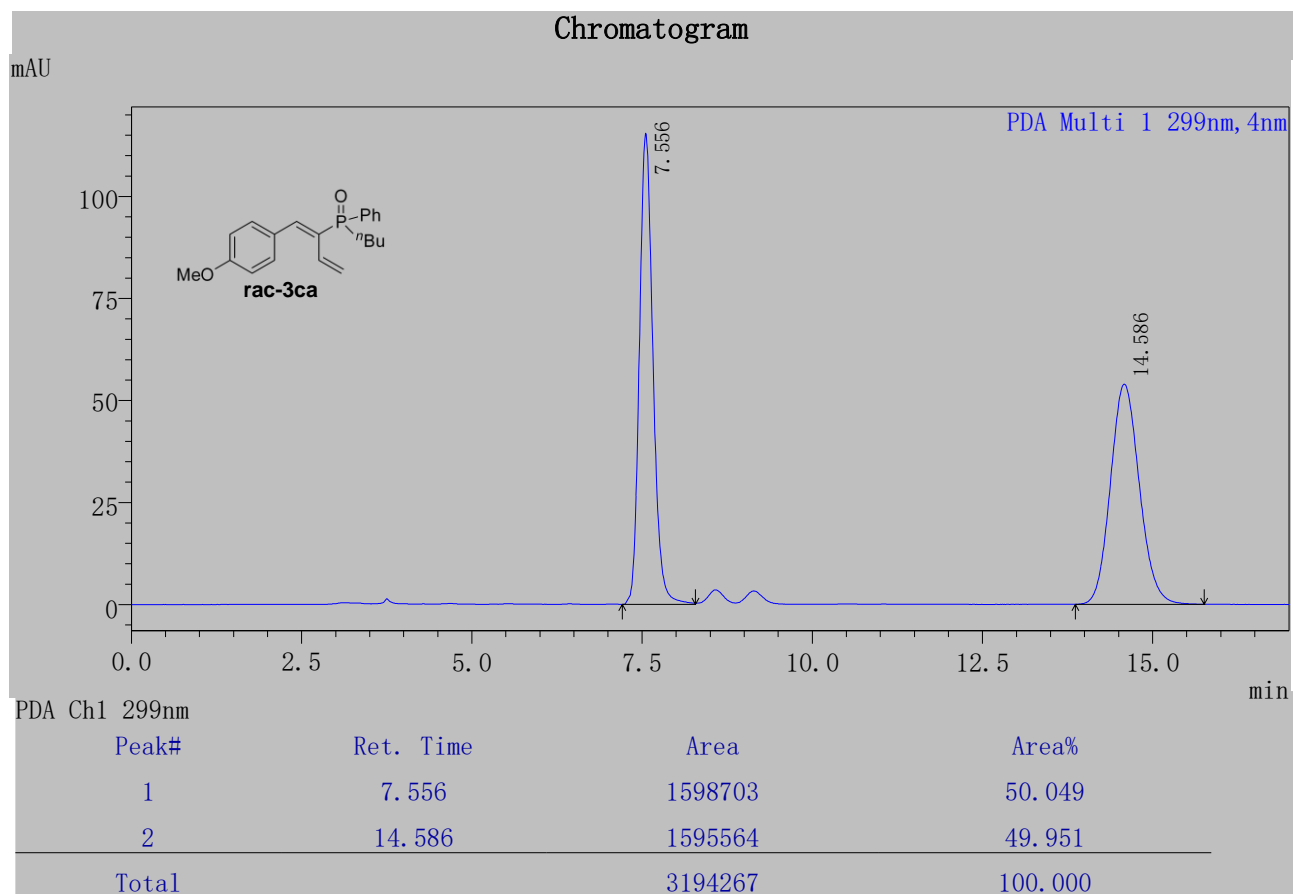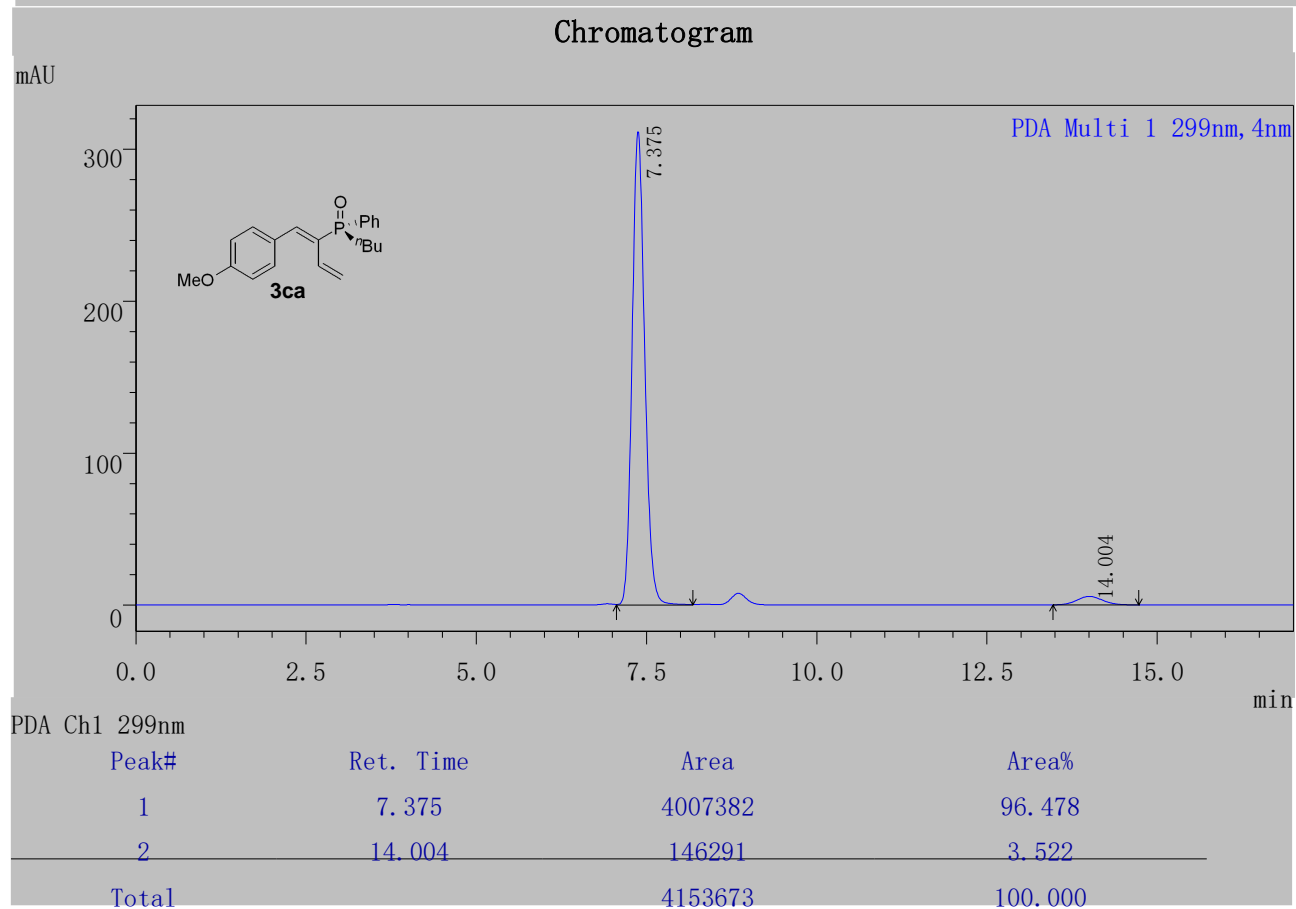

## Chromatogram

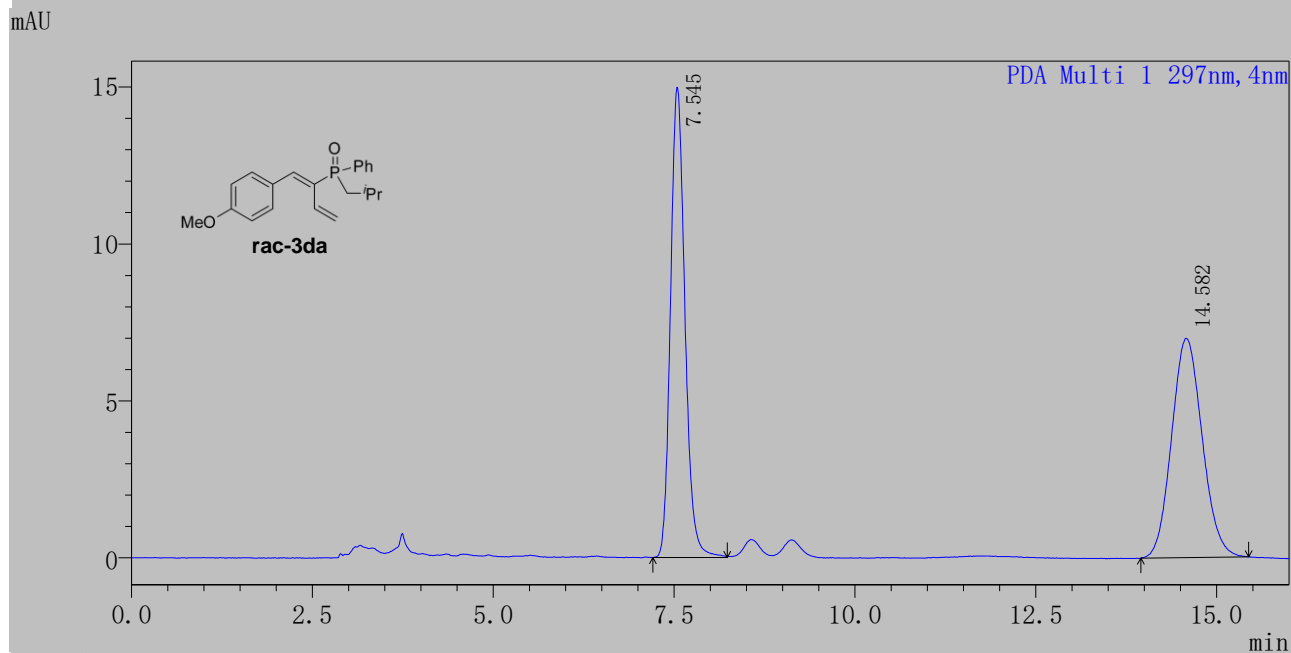

PDA Ch1 297nm

| Peak# | Ret. Time | Area   | Area%   |
|-------|-----------|--------|---------|
| 1     | 7.545     | 207810 | 50.284  |
| 2     | 14.582    | 205463 | 49.716  |
| Total |           | 413273 | 100.000 |

## Chromatogram

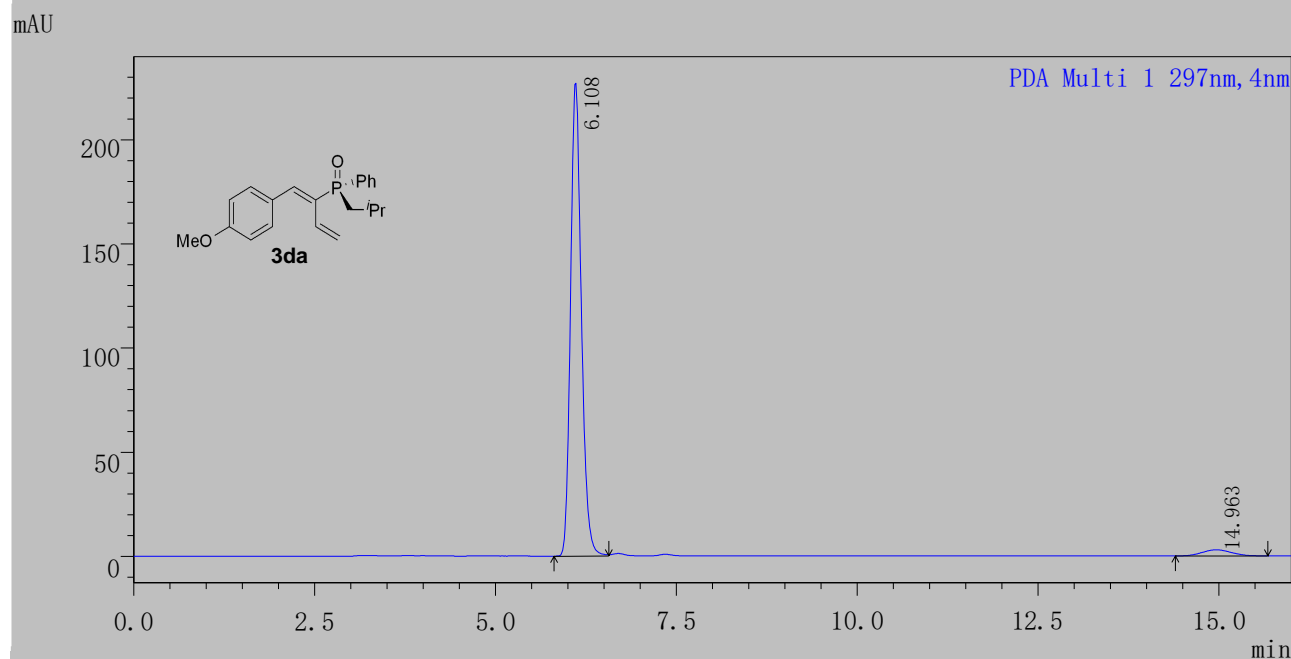

PDA Ch1 297nm

| Peak# | Ret. Time | Area    | Area%   |
|-------|-----------|---------|---------|
| 1     | 6.108     | 2369362 | 96.545  |
| 2     | 14.963    | 84789   | 3.455   |
| Total |           | 2454151 | 100.000 |



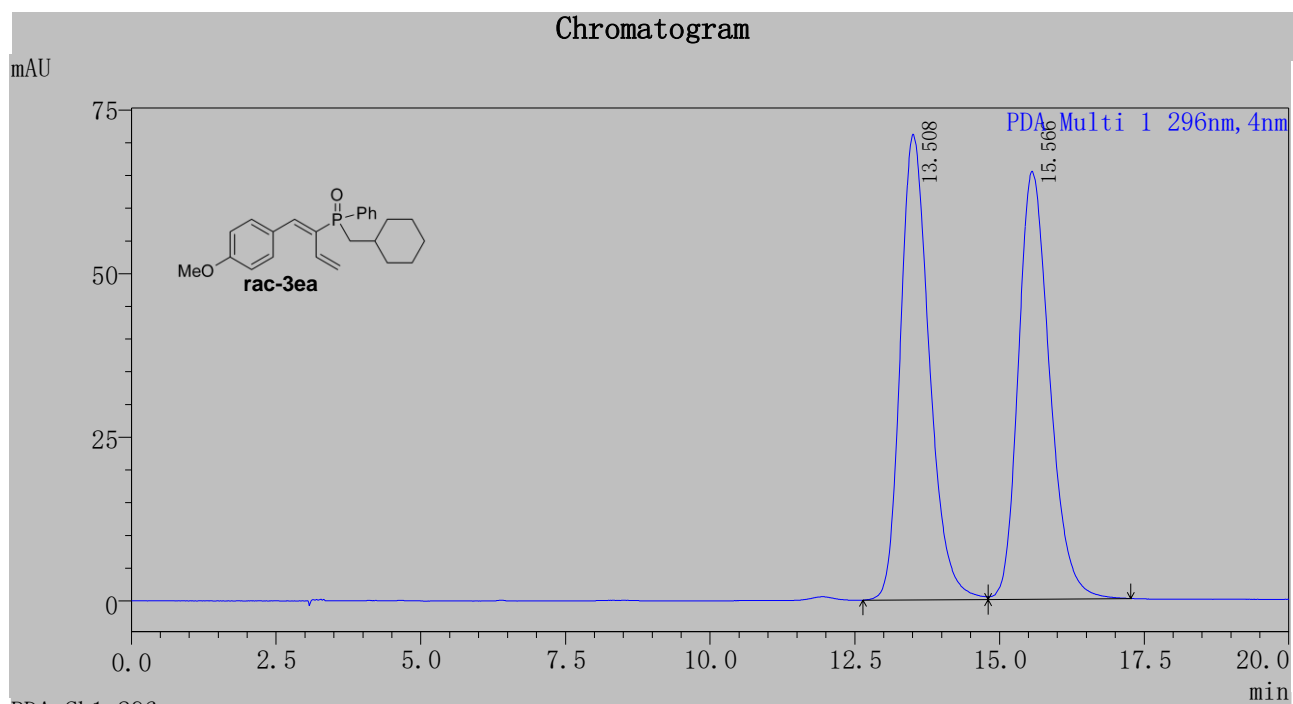

PDA Ch1 296nm

| Peak#        | Ret. Time | Area           | Area%          |
|--------------|-----------|----------------|----------------|
| 1            | 13.508    | 2463290        | 50.054         |
| 2            | 15.566    | 2457974        | 49.946         |
| <b>Total</b> |           | <b>4921264</b> | <b>100.000</b> |

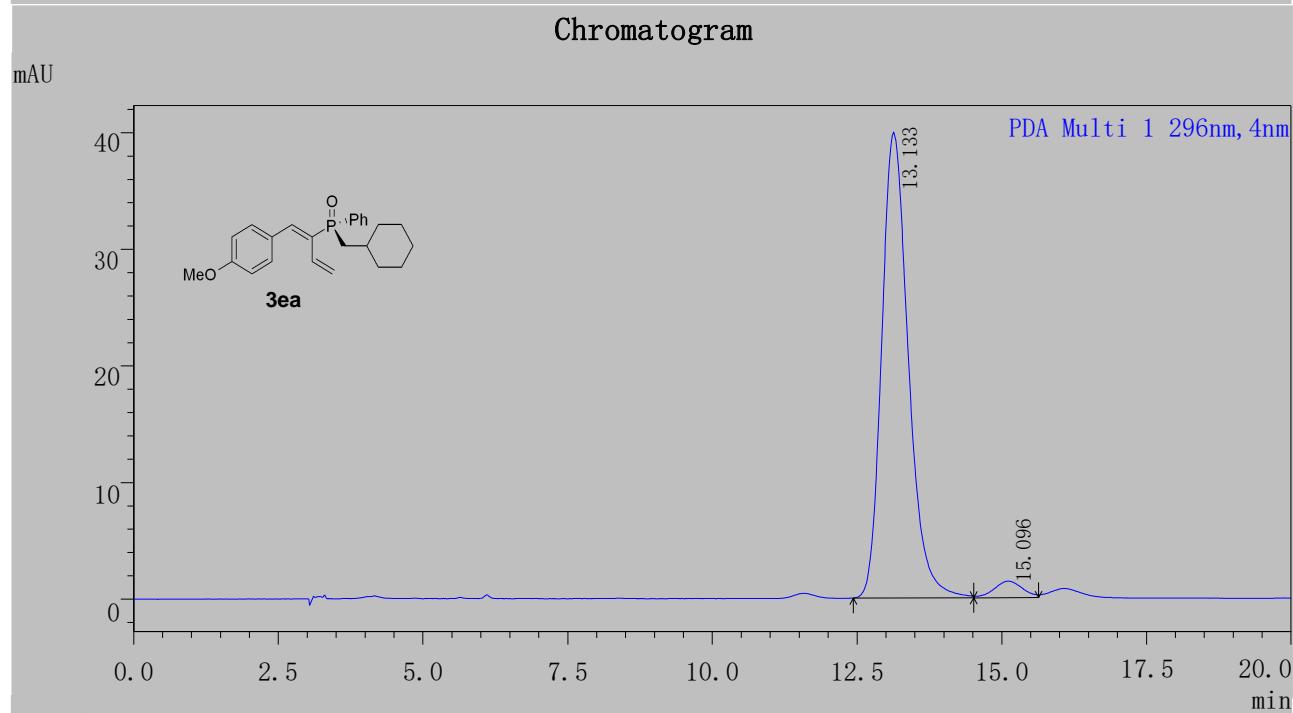

PDA Ch1 296nm

| Peak#        | Ret. Time | Area           | Area%          |
|--------------|-----------|----------------|----------------|
| 1            | 13.133    | 1278002        | 96.377         |
| 2            | 15.096    | 48049          | 3.623          |
| <b>Total</b> |           | <b>1326051</b> | <b>100.000</b> |

## Chromatogram

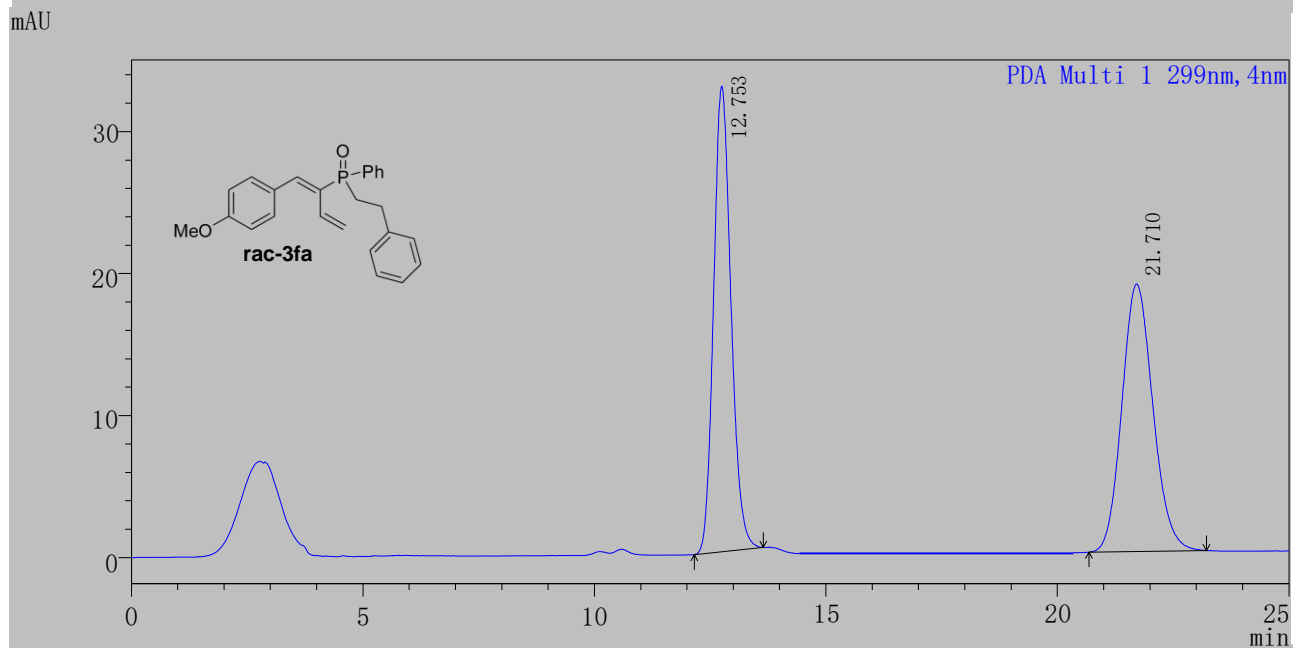

PDA Ch1 299nm

| Peak#        | Ret. Time | Area           | Area%          |
|--------------|-----------|----------------|----------------|
| 1            | 12.753    | 860985         | 49.520         |
| 2            | 21.710    | 877677         | 50.480         |
| <b>Total</b> |           | <b>1738662</b> | <b>100.000</b> |

## Chromatogram

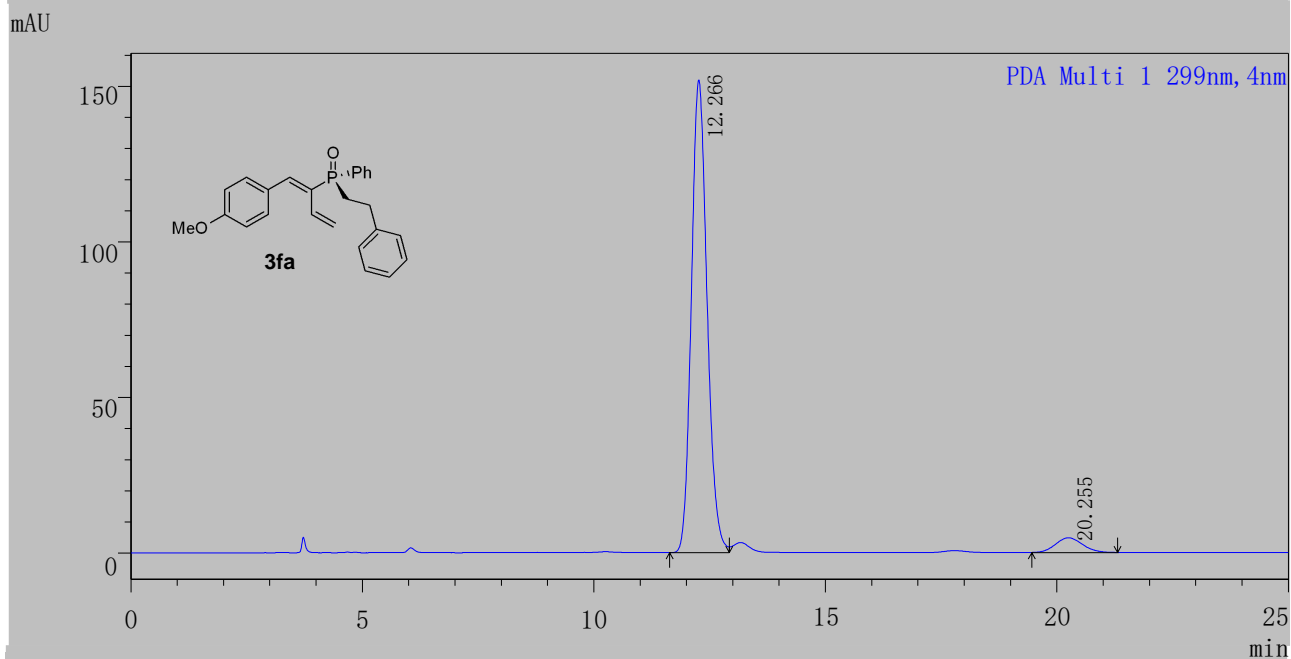

PDA Ch1 299nm

| Peak#        | Ret. Time | Area           | Area%          |
|--------------|-----------|----------------|----------------|
| 1            | 12.266    | 3584795        | 94.930         |
| 2            | 20.255    | 191454         | 5.070          |
| <b>Total</b> |           | <b>3776249</b> | <b>100.000</b> |

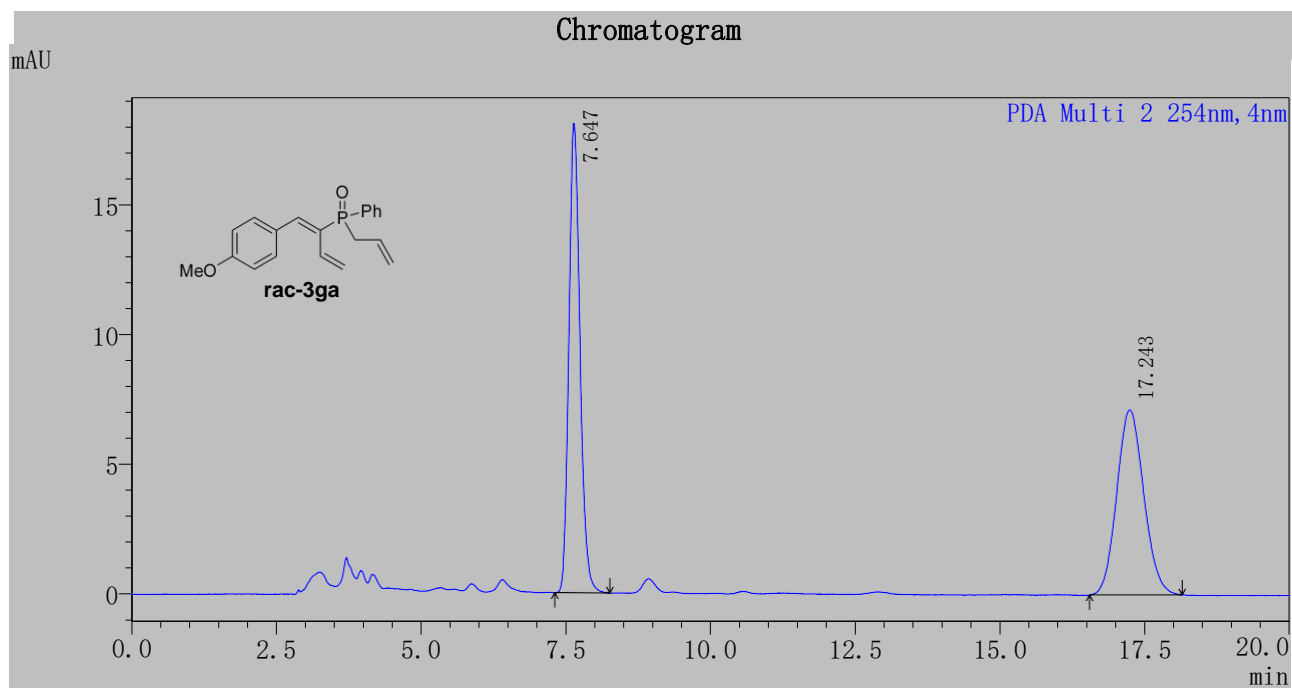

PDA Ch2 254nm

| Peak#        | Ret. Time | Area          | Area%          |
|--------------|-----------|---------------|----------------|
| 1            | 7.647     | 240978        | 51.084         |
| 2            | 17.243    | 230752        | 48.916         |
| <b>Total</b> |           | <b>471730</b> | <b>100.000</b> |

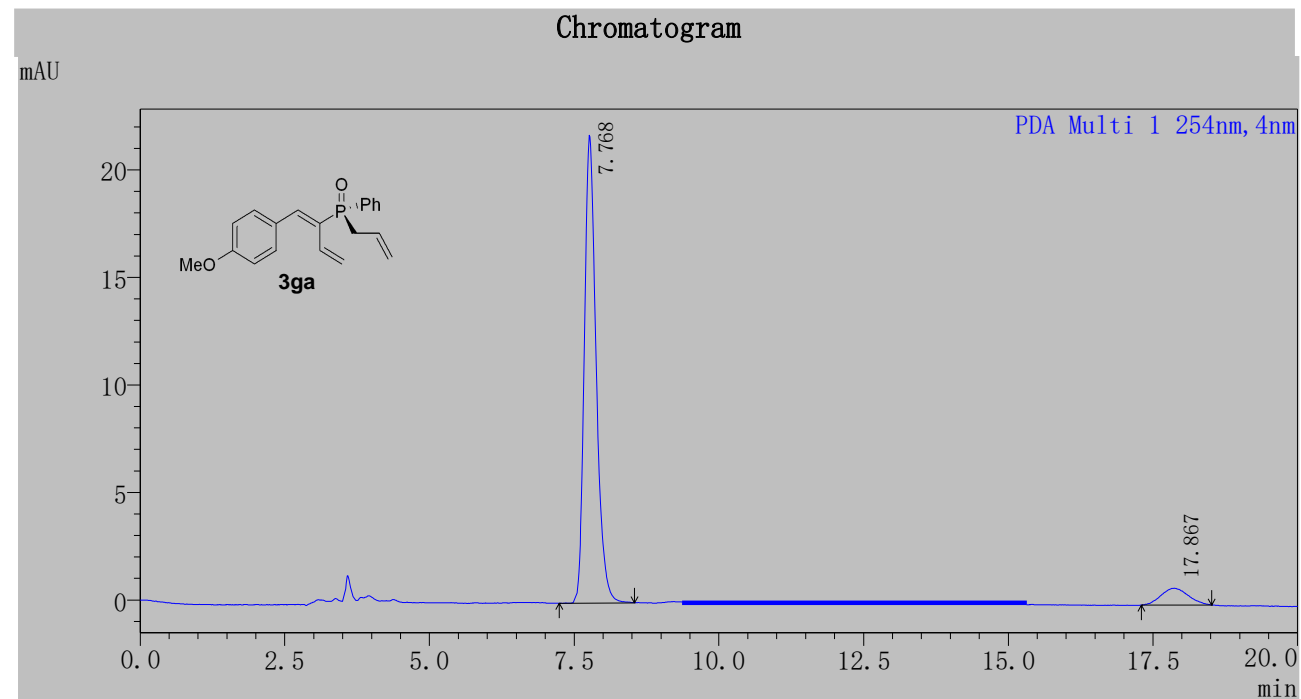

PDA Ch1 254nm

| Peak#        | Ret. Time | Area          | Area%          |
|--------------|-----------|---------------|----------------|
| 1            | 7.768     | 307909        | 92.384         |
| 2            | 17.867    | 25383         | 7.616          |
| <b>Total</b> |           | <b>333292</b> | <b>100.000</b> |

## Chromatogram

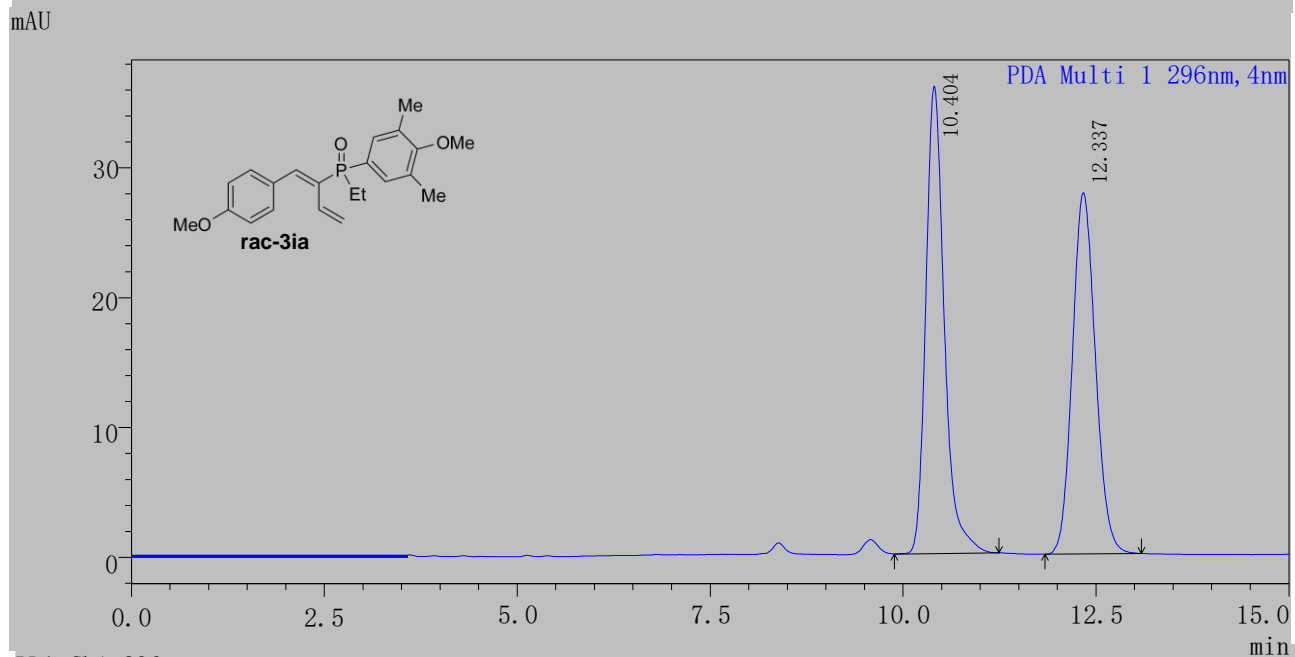

PDA Ch1 296nm

| Peak#        | Ret. Time | Area           | Area%          |
|--------------|-----------|----------------|----------------|
| 1            | 10.404    | 599850         | 50.988         |
| 2            | 12.337    | 576599         | 49.012         |
| <b>Total</b> |           | <b>1176450</b> | <b>100.000</b> |

## Chromatogram

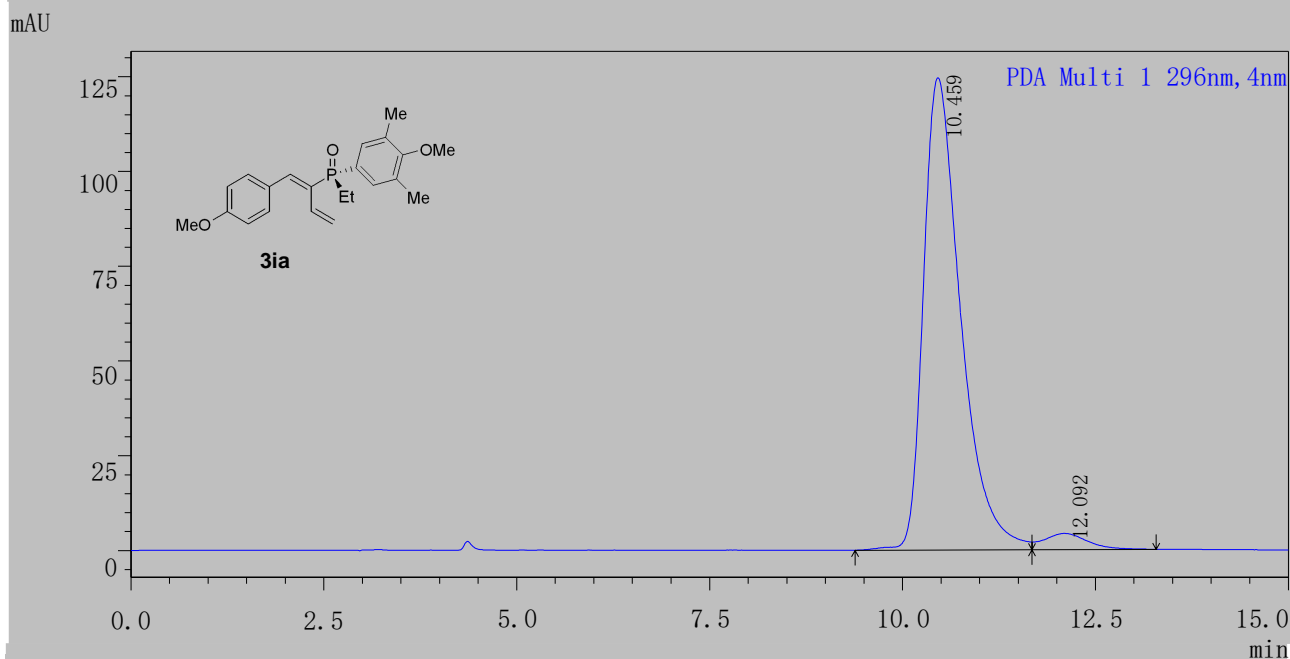

PDA Ch1 296nm

| Peak#        | Ret. Time | Area           | Area%          |
|--------------|-----------|----------------|----------------|
| 1            | 10.459    | 4175577        | 96.158         |
| 2            | 12.092    | 166845         | 3.842          |
| <b>Total</b> |           | <b>4342421</b> | <b>100.000</b> |

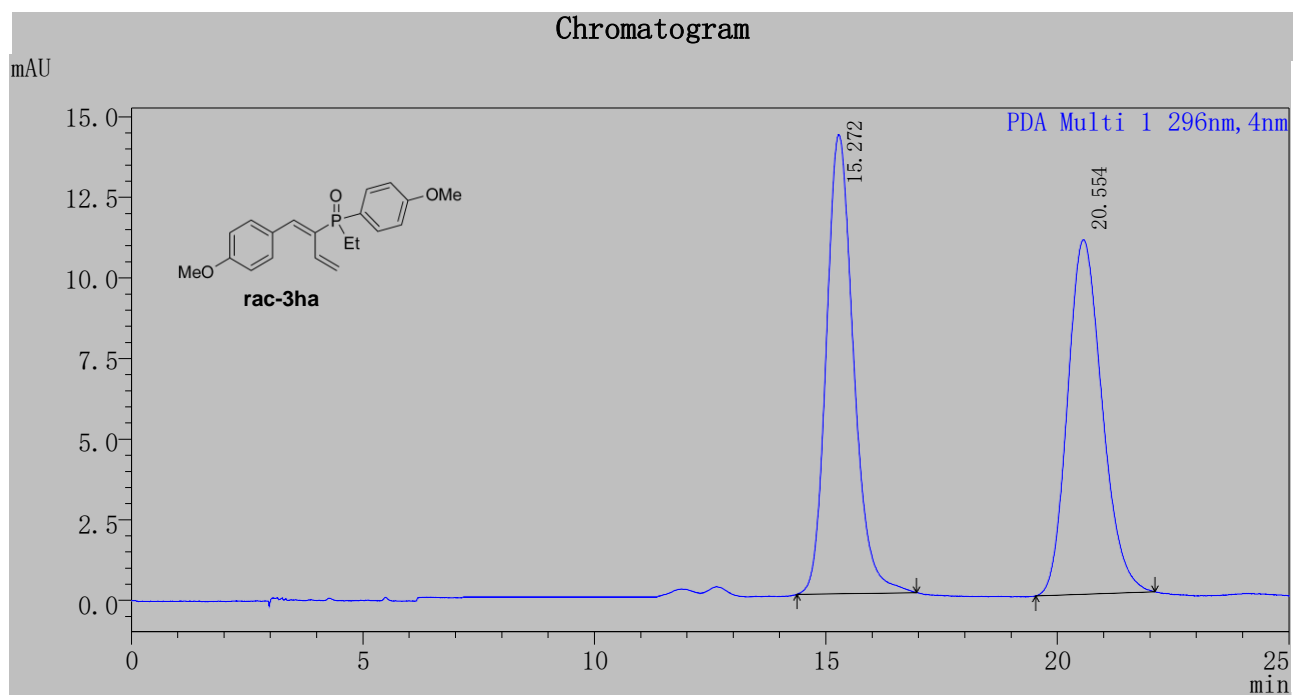

PDA Ch1 296nm

| Peak#        | Ret. Time | Area           | Area%          |
|--------------|-----------|----------------|----------------|
| 1            | 15.272    | 580456         | 50.446         |
| 2            | 20.554    | 570184         | 49.554         |
| <b>Total</b> |           | <b>1150640</b> | <b>100.000</b> |

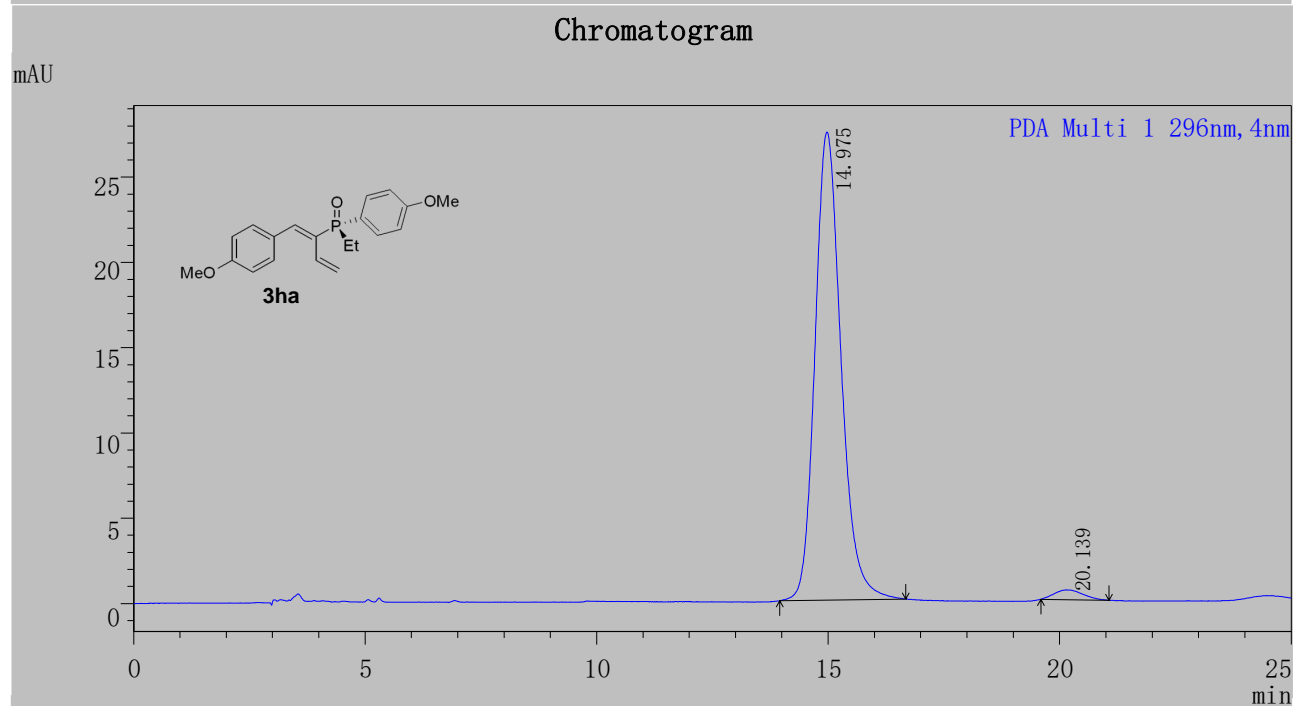

PDA Ch1 296nm

| Peak#        | Ret. Time | Area           | Area%          |
|--------------|-----------|----------------|----------------|
| 1            | 14.975    | 1071506        | 97.719         |
| 2            | 20.139    | 25007          | 2.281          |
| <b>Total</b> |           | <b>1096513</b> | <b>100.000</b> |

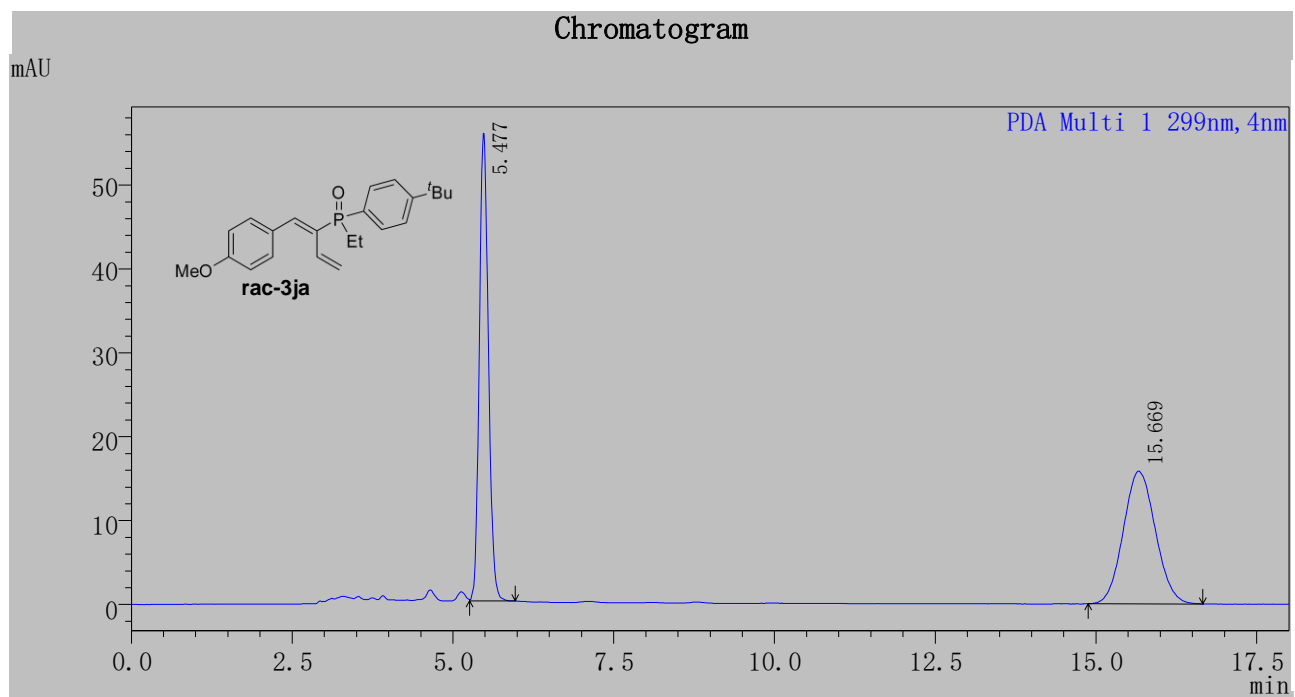

PDA Ch1 299nm

| Peak#        | Ret. Time | Area           | Area%          |
|--------------|-----------|----------------|----------------|
| 1            | 5.477     | 550109         | 50.005         |
| 2            | 15.669    | 550004         | 49.995         |
| <b>Total</b> |           | <b>1100113</b> | <b>100.000</b> |

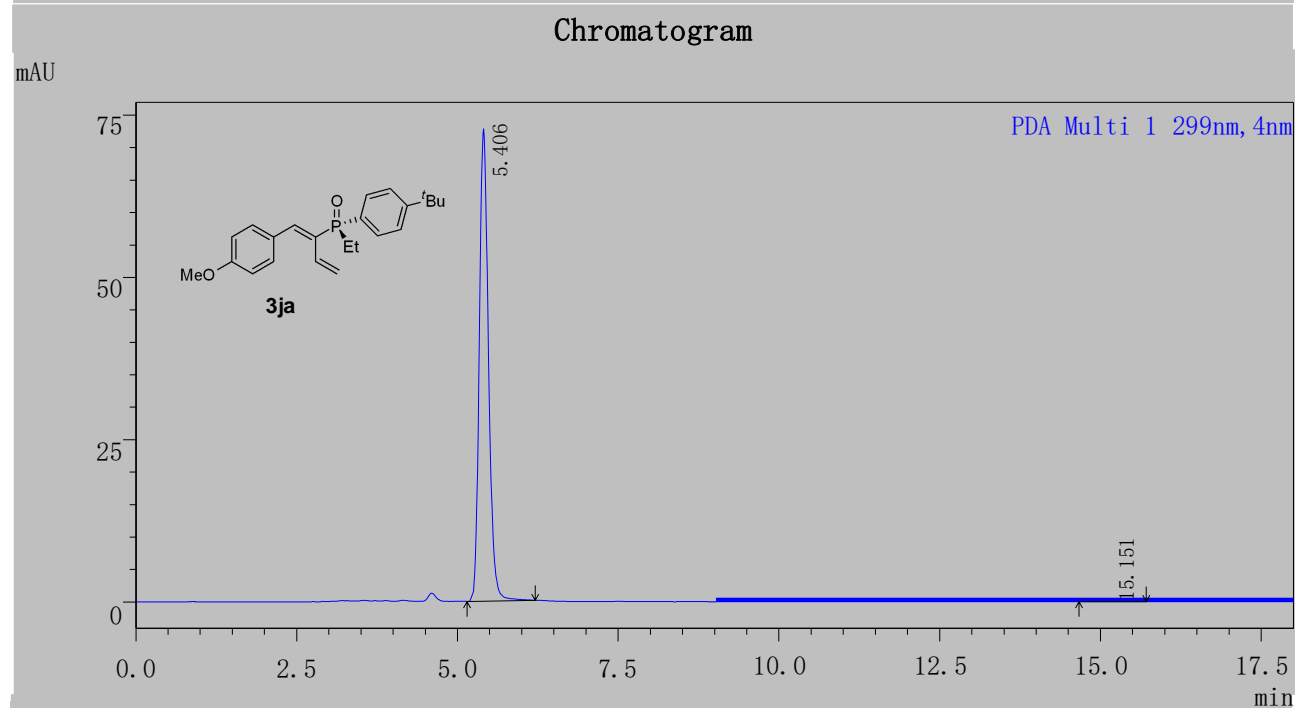

PDA Ch1 299nm

| Peak#        | Ret. Time | Area          | Area%          |
|--------------|-----------|---------------|----------------|
| 1            | 5.406     | 724363        | 97.726         |
| 2            | 15.151    | 16853         | 2.274          |
| <b>Total</b> |           | <b>741216</b> | <b>100.000</b> |

## Chromatogram

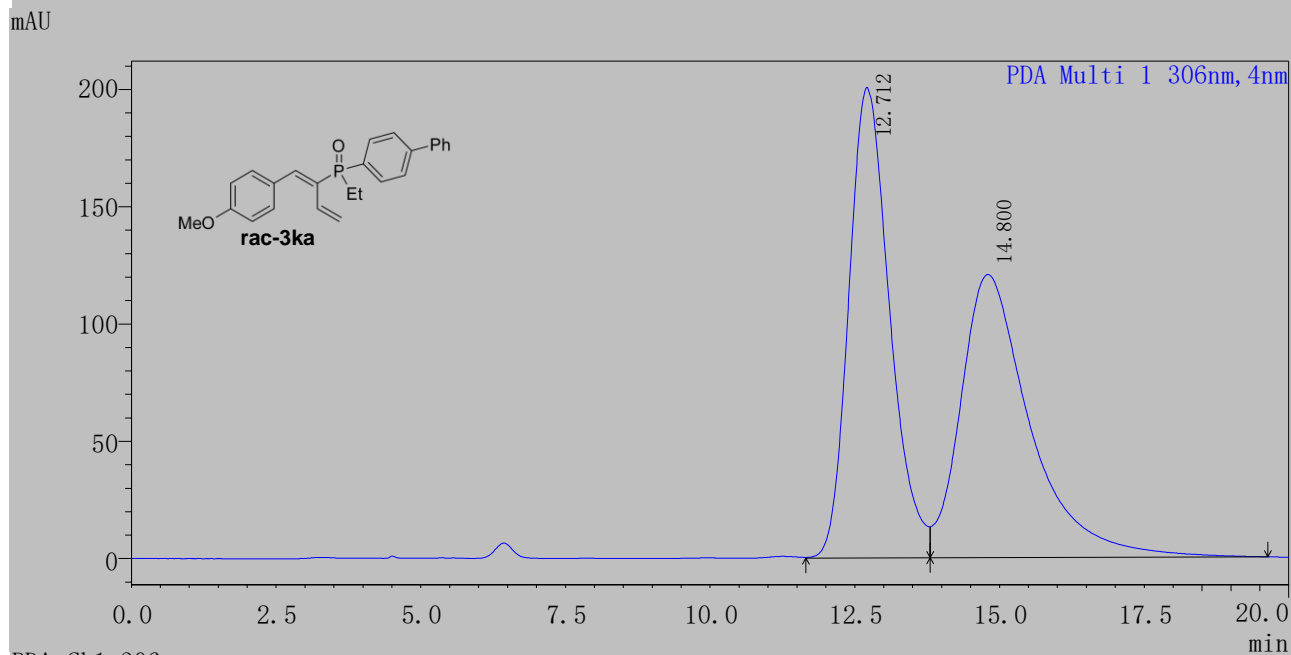

PDA Ch1 306nm

| Peak# | Ret. Time | Area     | Area%   |
|-------|-----------|----------|---------|
| 1     | 12.712    | 9848840  | 49.420  |
| 2     | 14.800    | 10080066 | 50.580  |
| Total |           | 19928906 | 100.000 |

## Chromatogram

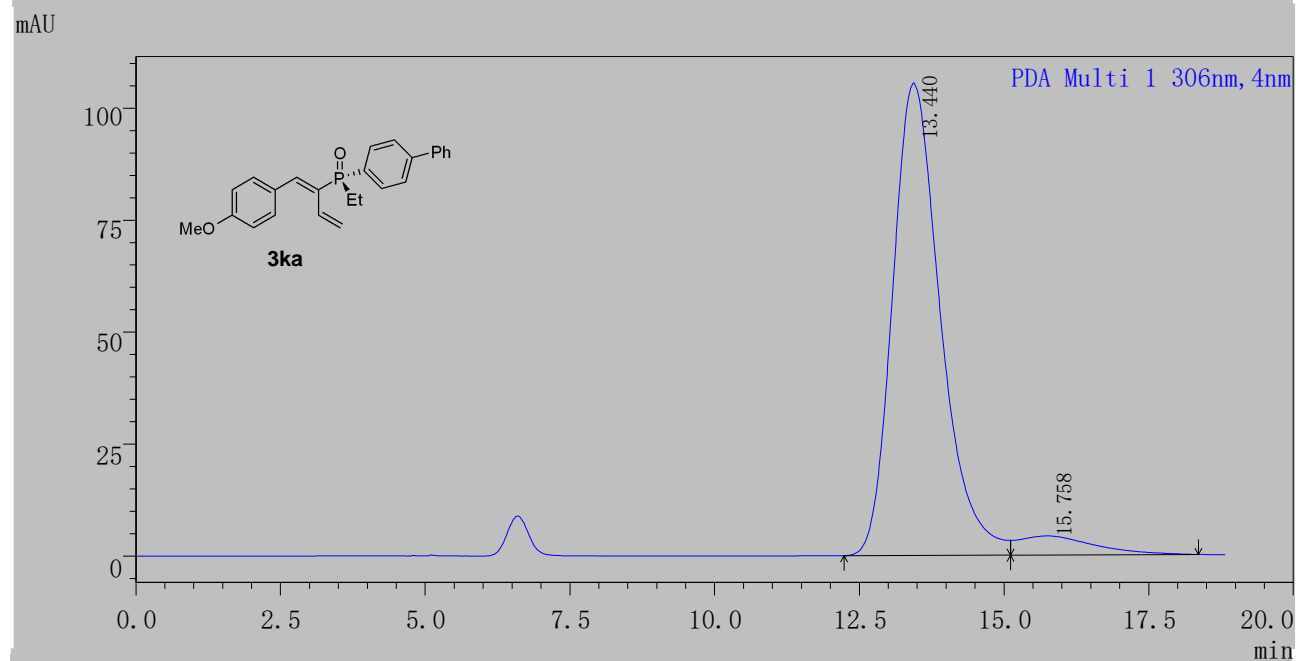

PDA Ch1 306nm

| Peak# | Ret. Time | Area    | Area%   |
|-------|-----------|---------|---------|
| 1     | 13.440    | 6069398 | 94.018  |
| 2     | 15.758    | 386145  | 5.982   |
| Total |           | 6455543 | 100.000 |

## Chromatogram

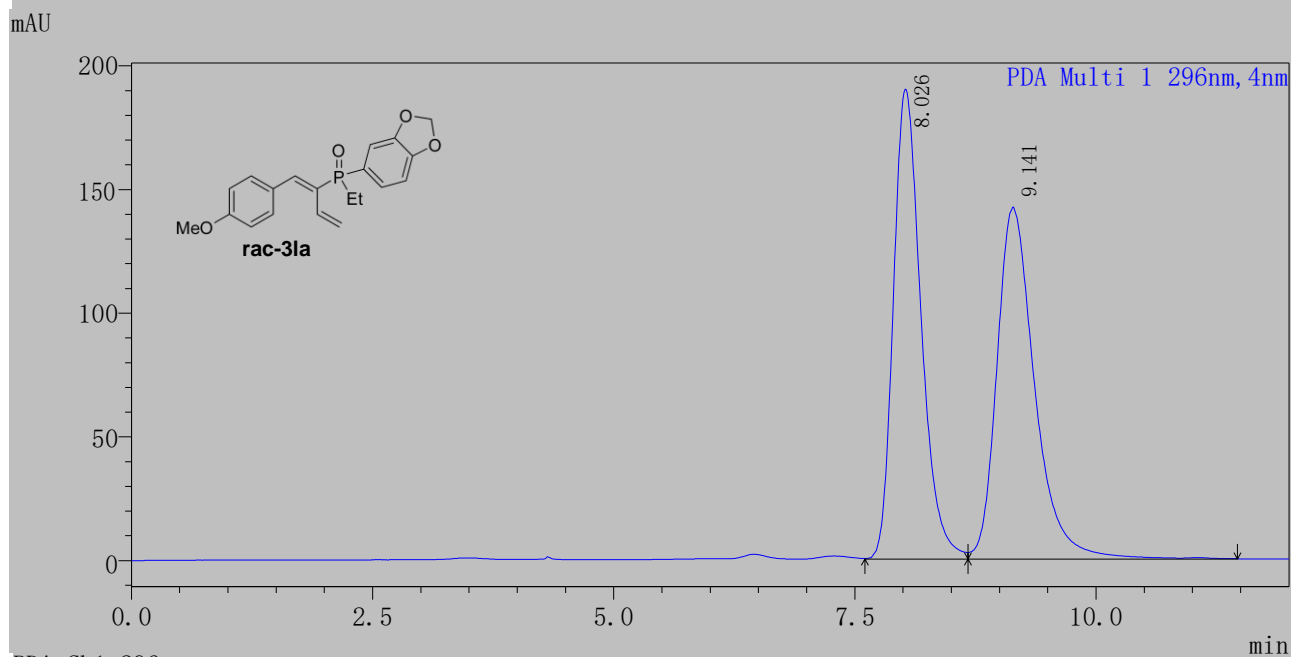

PDA Ch1 296nm

| Peak# | Ret. Time | Area    | Area%   |
|-------|-----------|---------|---------|
| 1     | 8.026     | 3787720 | 49.415  |
| 2     | 9.141     | 3877421 | 50.585  |
| Total |           | 7665142 | 100.000 |

## Chromatogram

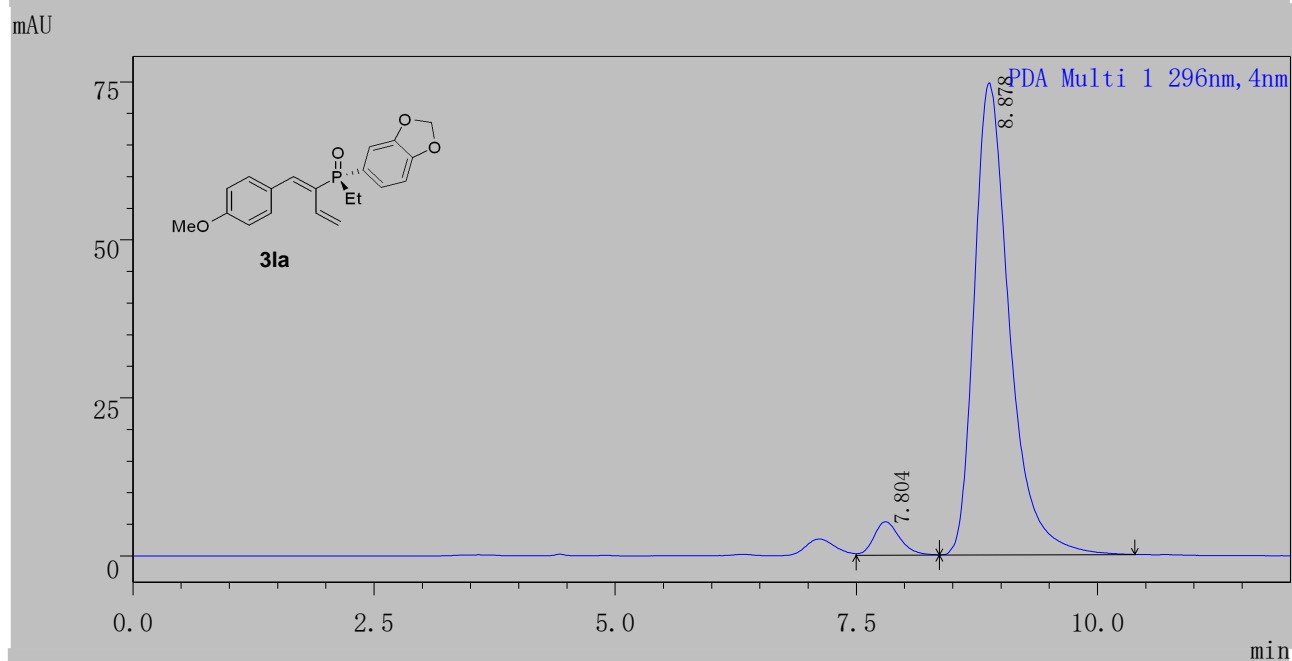

PDA Ch1 296nm

| Peak# | Ret. Time | Area    | Area%   |
|-------|-----------|---------|---------|
| 1     | 7.804     | 99387   | 4.988   |
| 2     | 8.878     | 1893156 | 95.012  |
| Total |           | 1992543 | 100.000 |



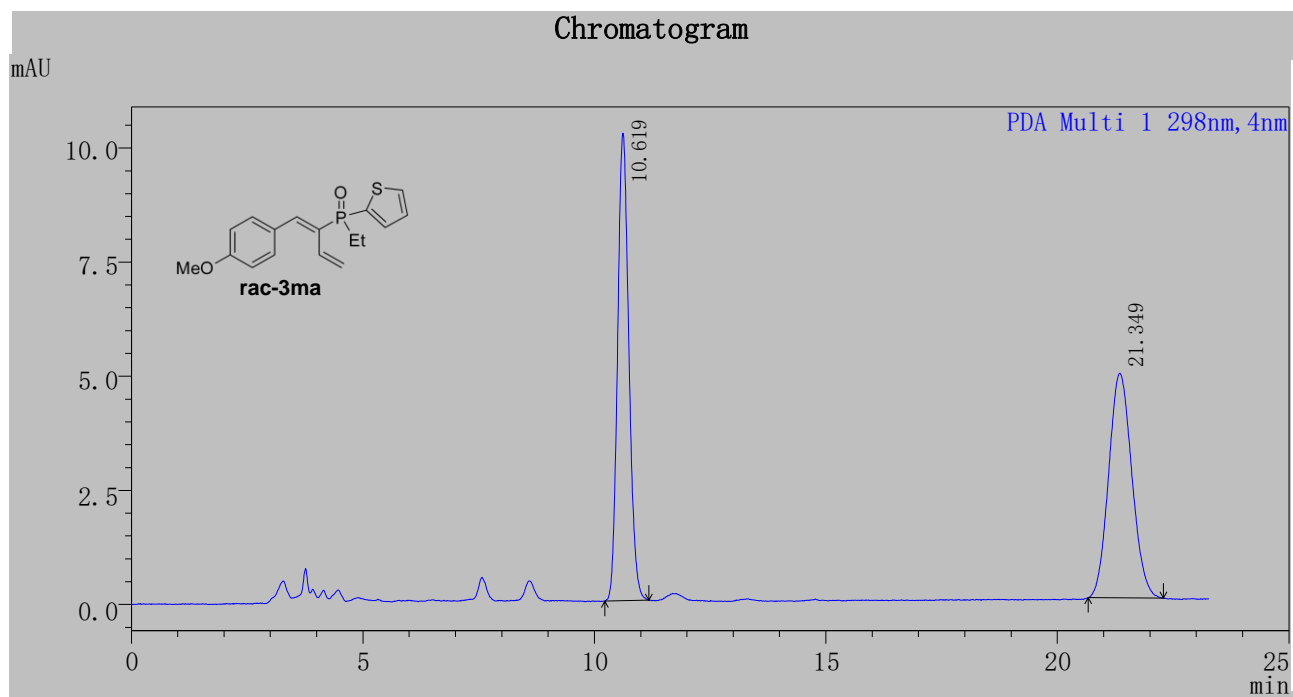

PDA Ch1 298nm

| Peak#        | Ret. Time | Area          | Area%          |
|--------------|-----------|---------------|----------------|
| 1            | 10.619    | 173723        | 50.286         |
| 2            | 21.349    | 171745        | 49.714         |
| <b>Total</b> |           | <b>345468</b> | <b>100.000</b> |

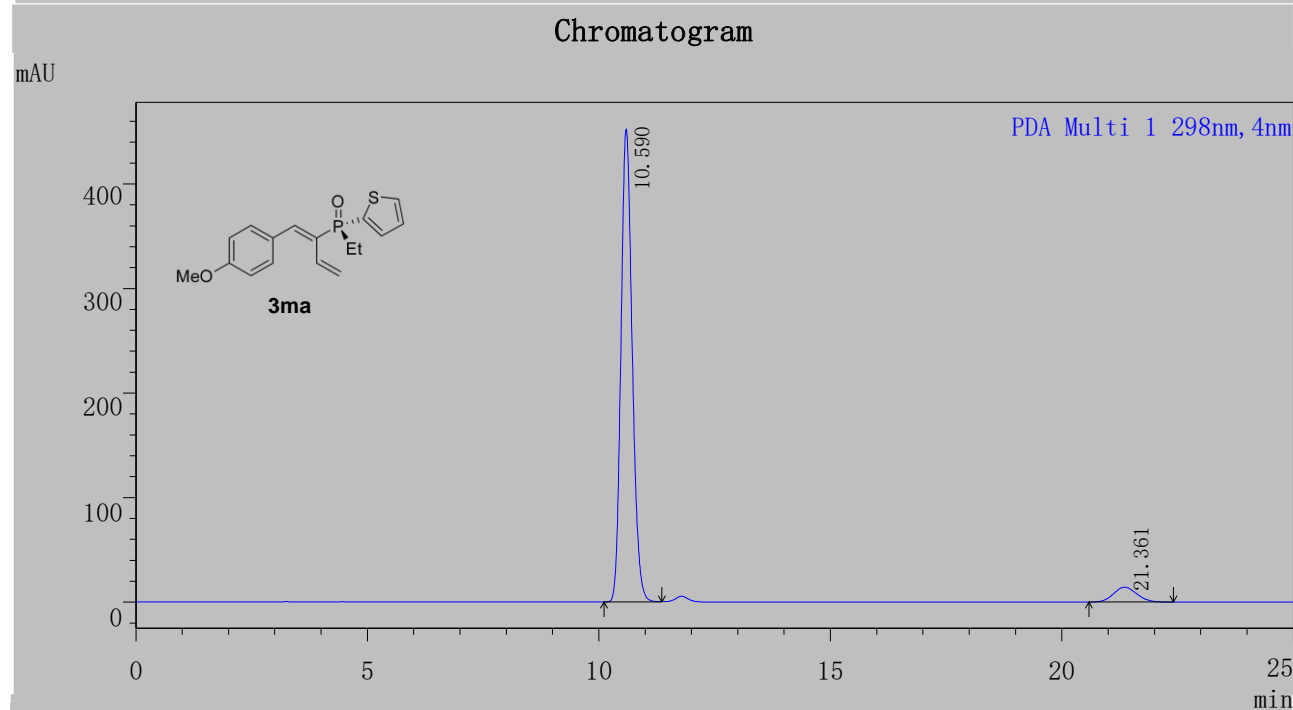

PDA Ch1 298nm

| Peak#        | Ret. Time | Area           | Area%          |
|--------------|-----------|----------------|----------------|
| 1            | 10.590    | 7637215        | 93.824         |
| 2            | 21.361    | 502705         | 6.176          |
| <b>Total</b> |           | <b>8139920</b> | <b>100.000</b> |

## Chromatogram

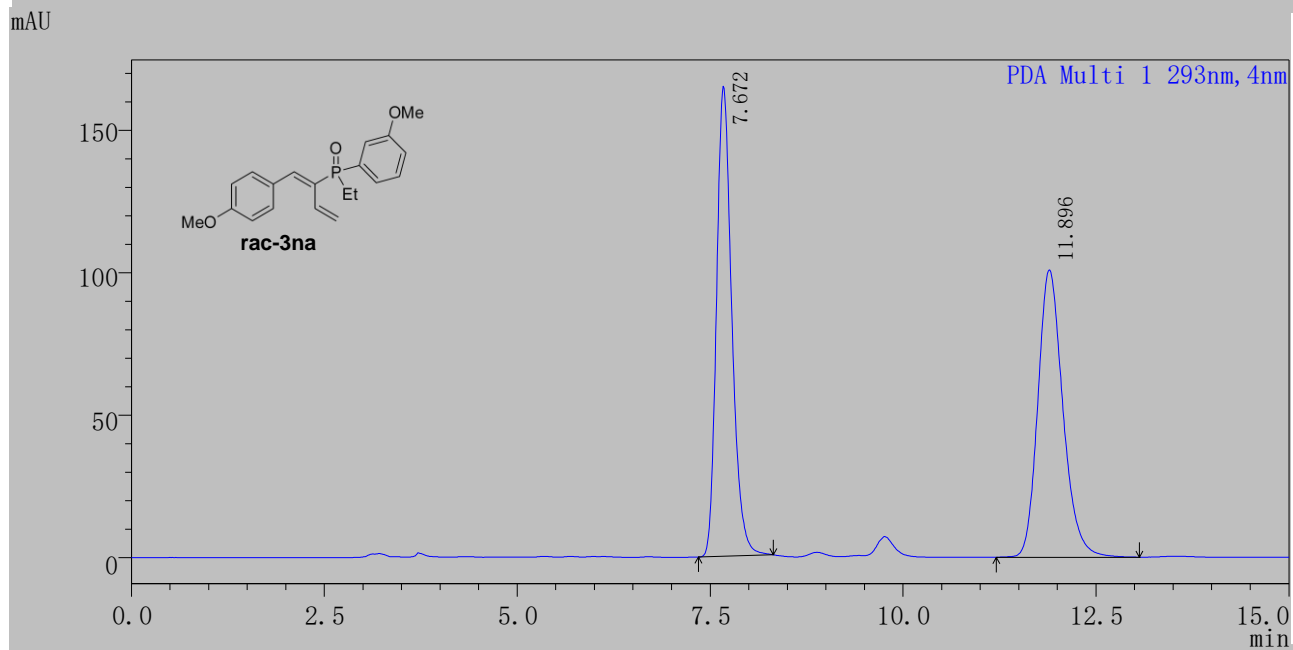

PDA Ch1 293nm

| Peak# | Ret. Time | Area    | Area%   |
|-------|-----------|---------|---------|
| 1     | 7.672     | 2272441 | 49.914  |
| 2     | 11.896    | 2280287 | 50.086  |
| Total |           | 4552728 | 100.000 |

## Chromatogram

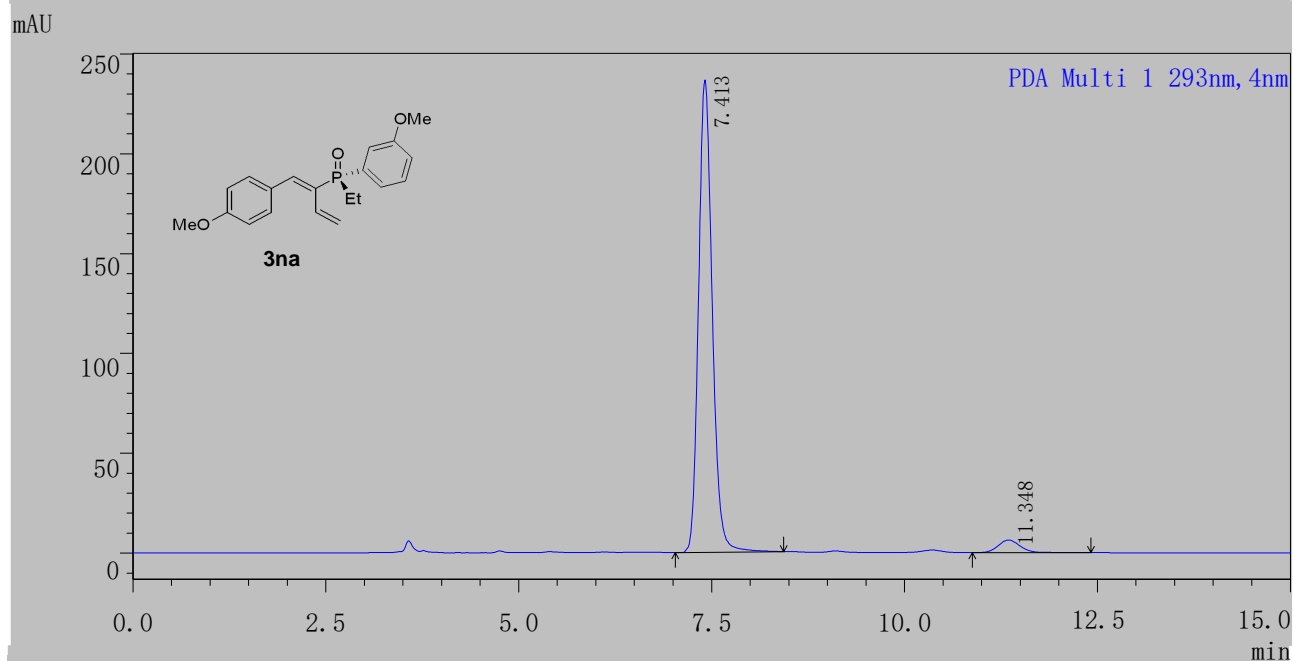

PDA Ch1 293nm

| Peak# | Ret. Time | Area    | Area%   |
|-------|-----------|---------|---------|
| 1     | 7.413     | 2915667 | 95.901  |
| 2     | 11.348    | 124633  | 4.099   |
| Total |           | 3040300 | 100.000 |

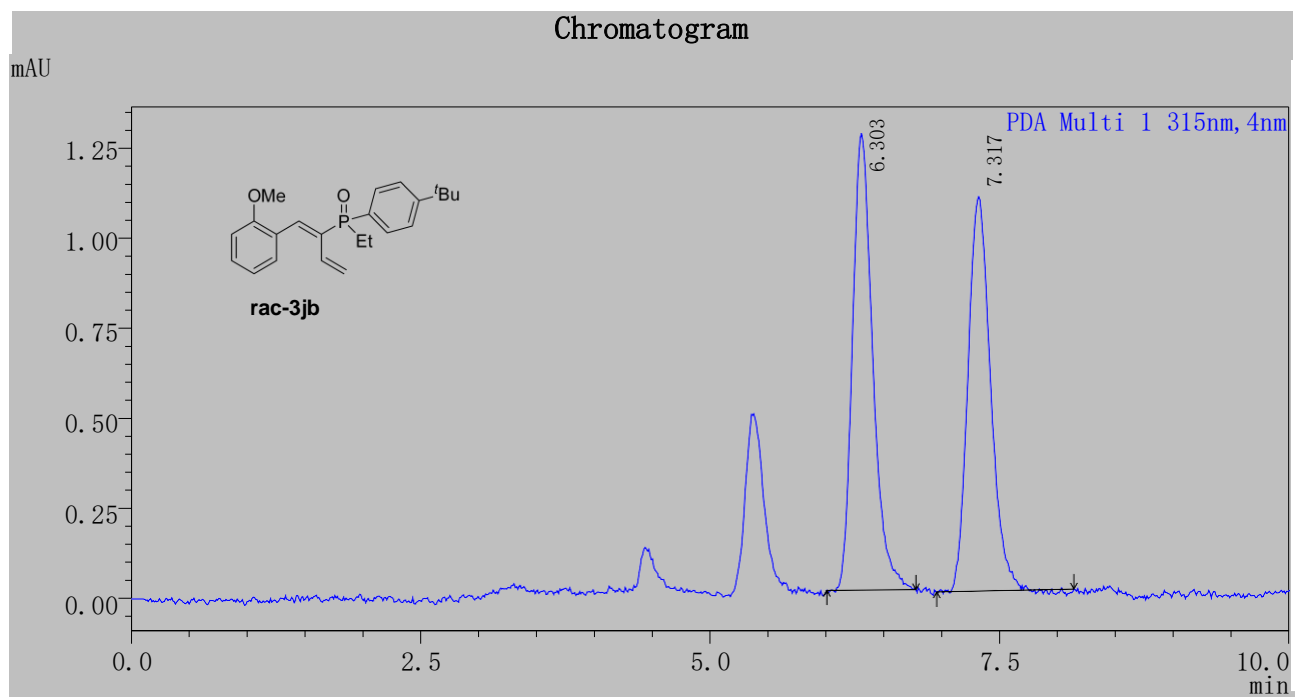

PDA Ch1 315nm

| Peak#        | Ret. Time | Area         | Area%          |
|--------------|-----------|--------------|----------------|
| 1            | 6.303     | 15364        | 51.170         |
| 2            | 7.317     | 14661        | 48.830         |
| <b>Total</b> |           | <b>30025</b> | <b>100.000</b> |

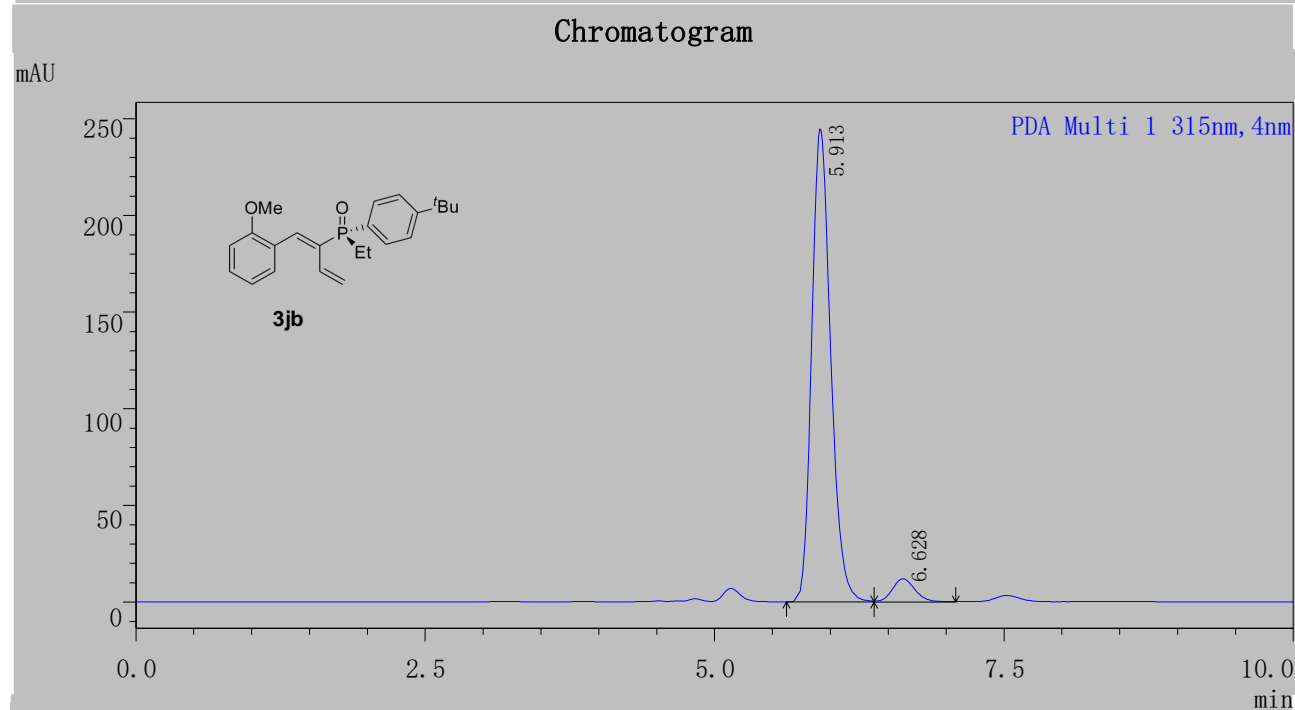

PDA Ch1 315nm

| Peak#        | Ret. Time | Area           | Area%          |
|--------------|-----------|----------------|----------------|
| 1            | 5.913     | 2790944        | 94.540         |
| 2            | 6.628     | 161173         | 5.460          |
| <b>Total</b> |           | <b>2952117</b> | <b>100.000</b> |

## Chromatogram

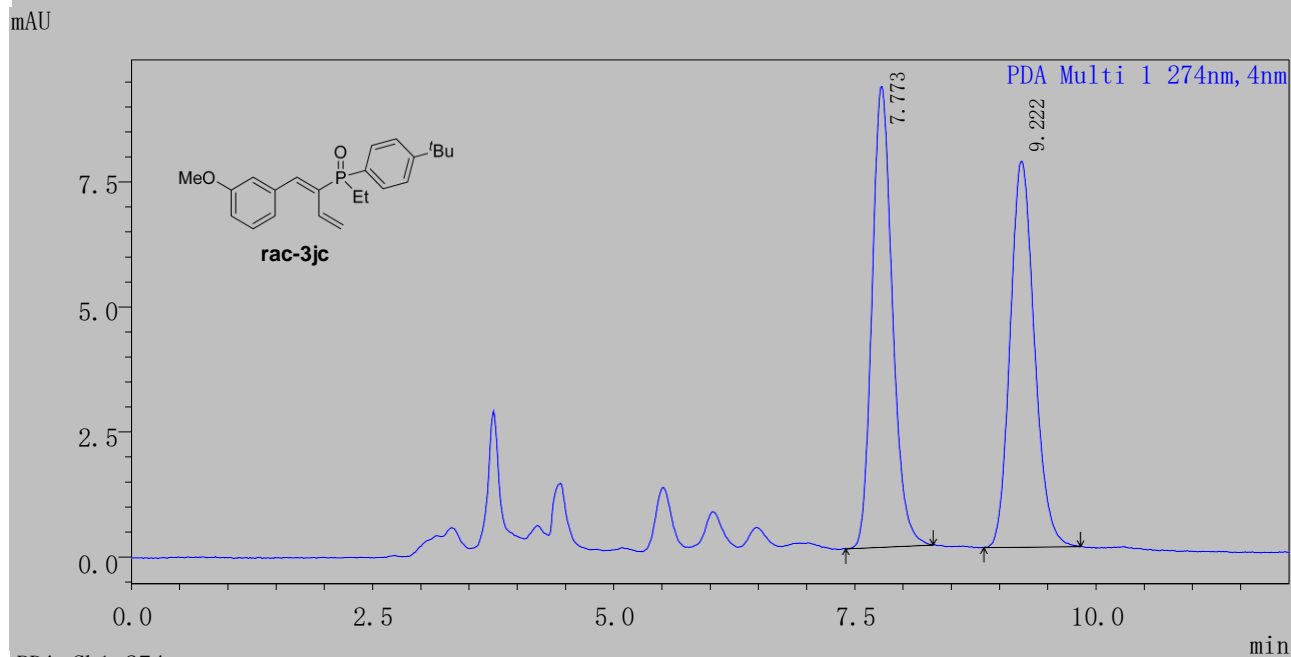

PDA Ch1 274nm

| Peak# | Ret. Time | Area   | Area%   |
|-------|-----------|--------|---------|
| 1     | 7.773     | 135178 | 50.069  |
| 2     | 9.222     | 134806 | 49.931  |
| Total |           | 269984 | 100.000 |

## Chromatogram

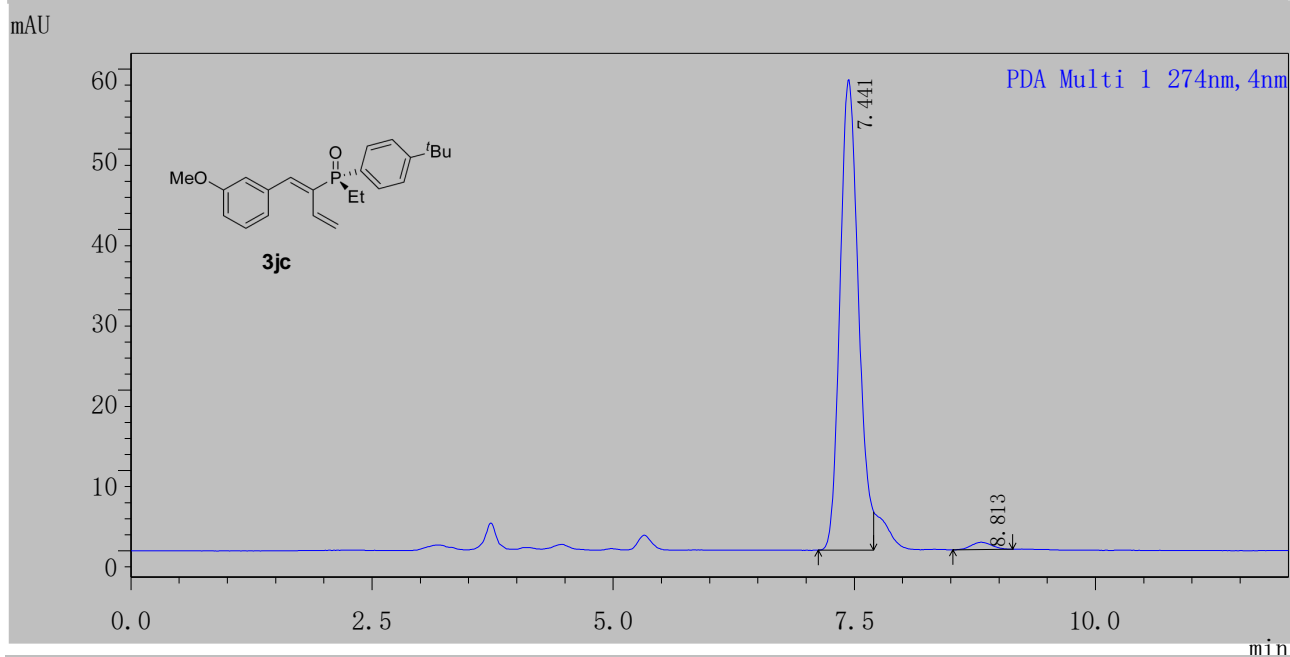

PDA Ch1 274nm

| Peak# | Ret. Time | Area   | Area%   |
|-------|-----------|--------|---------|
| 1     | 7.441     | 779174 | 98.308  |
| 2     | 8.813     | 13412  | 1.692   |
| Total |           | 792587 | 100.000 |

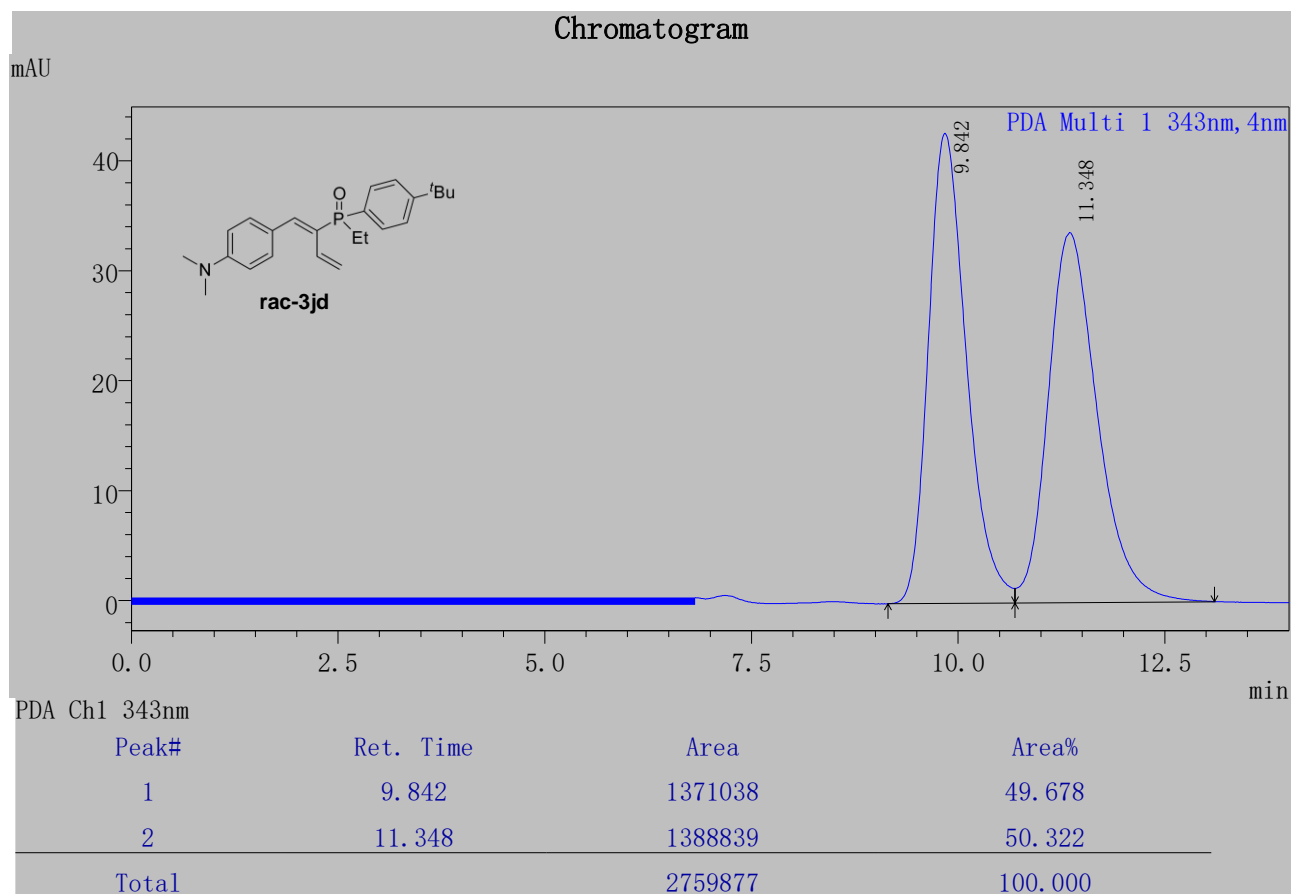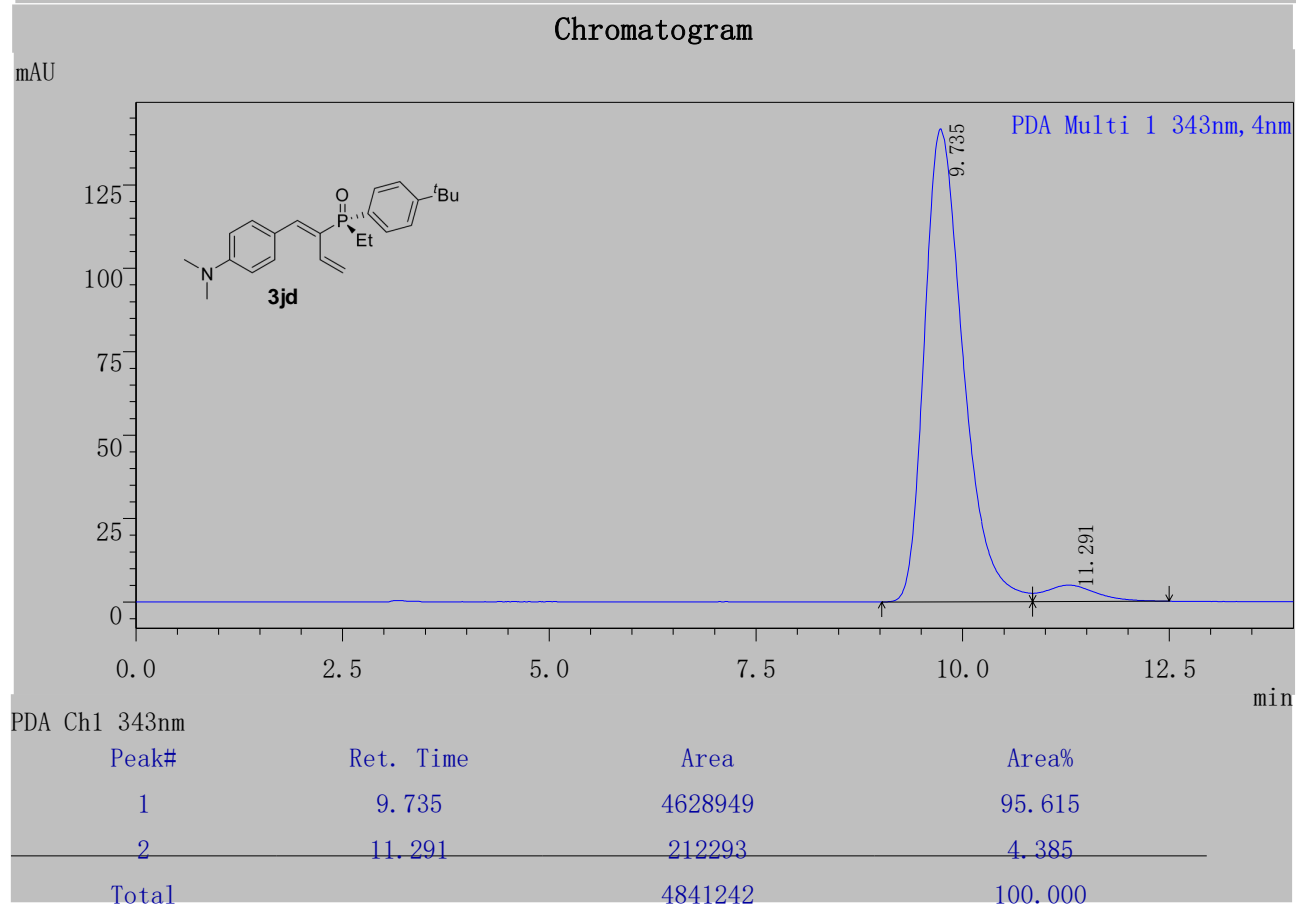

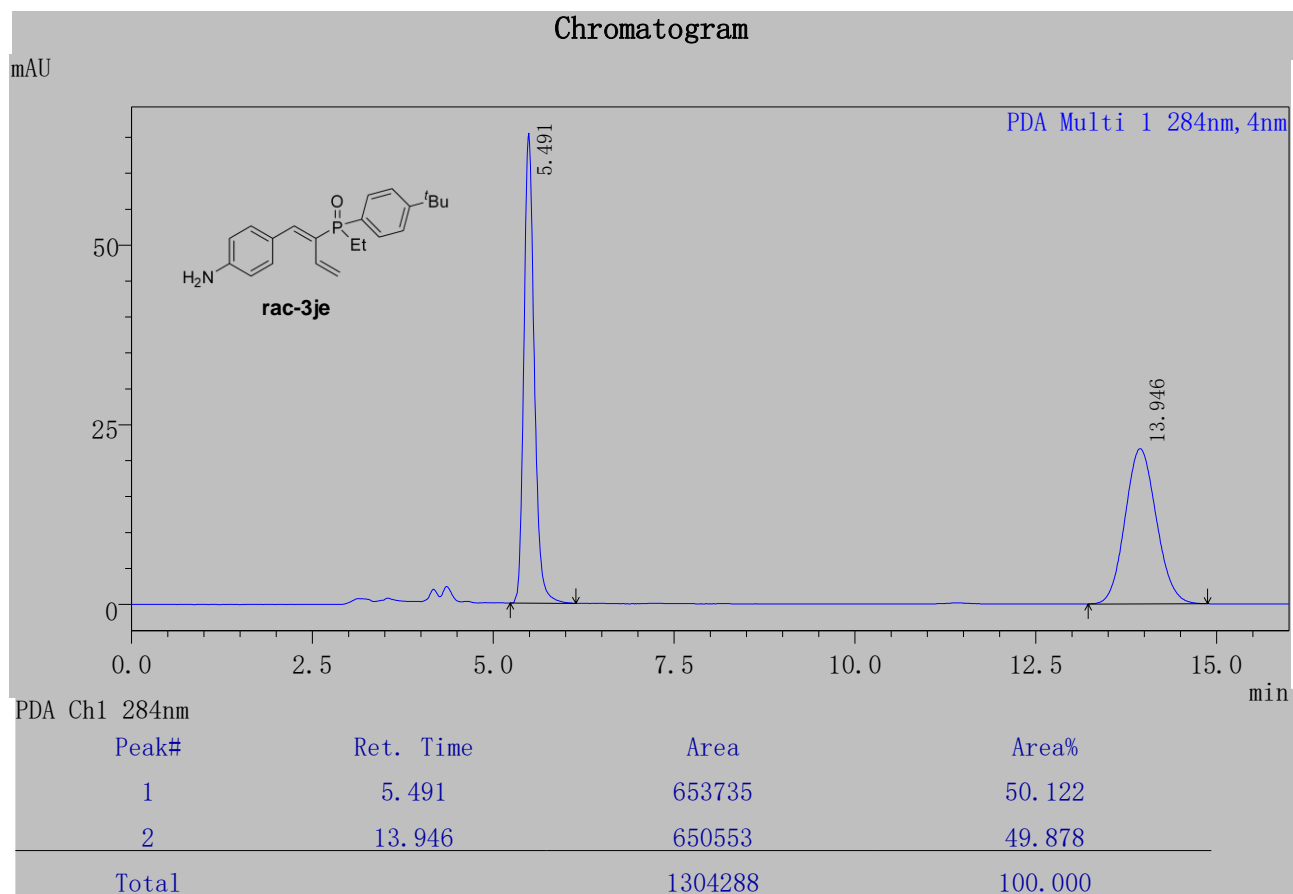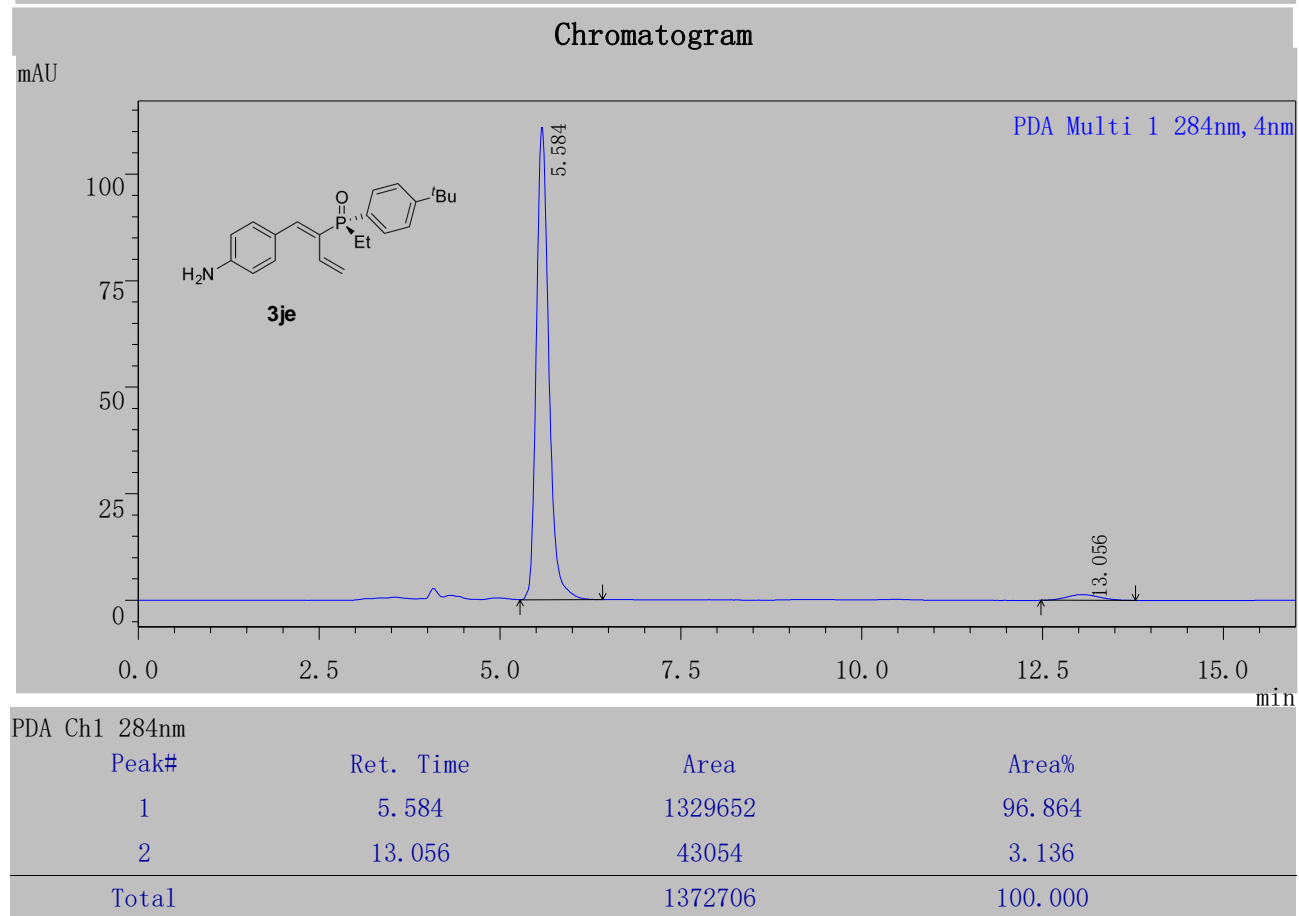

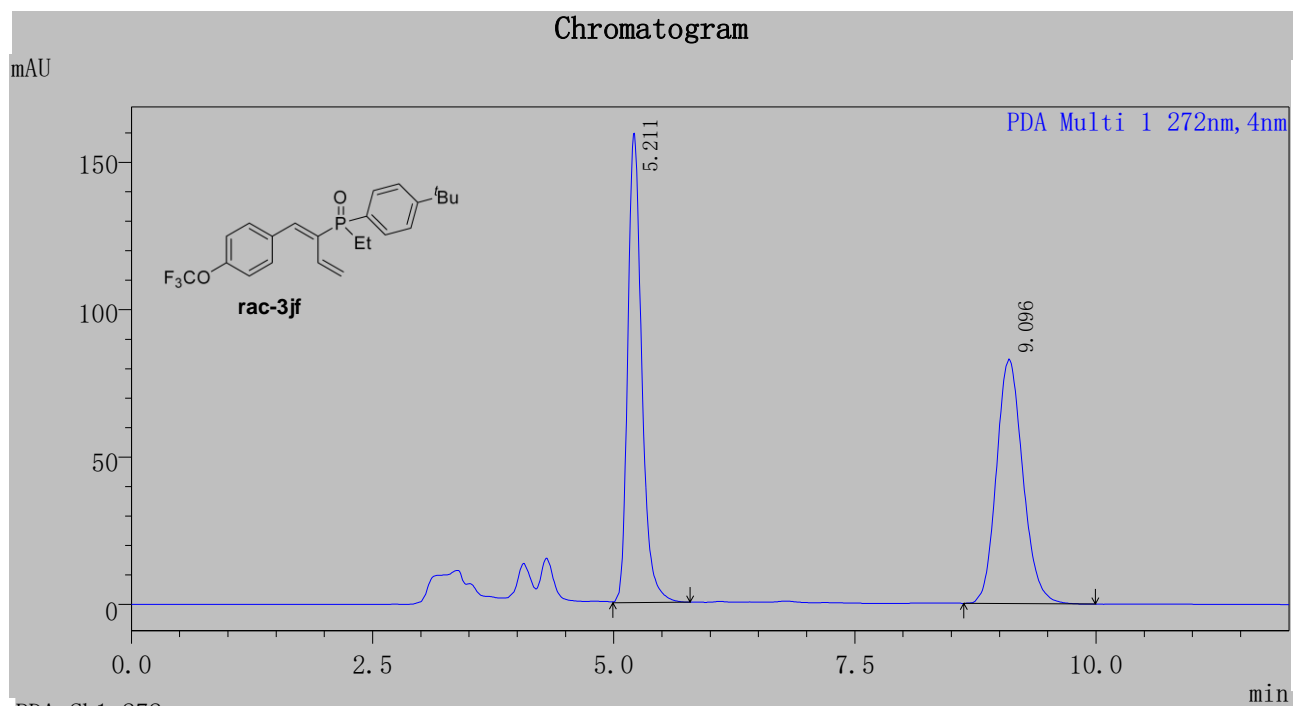

PDA Ch1 272nm

| Peak#        | Ret. Time | Area           | Area%          |
|--------------|-----------|----------------|----------------|
| 1            | 5.211     | 1603874        | 50.400         |
| 2            | 9.096     | 1578396        | 49.600         |
| <b>Total</b> |           | <b>3182269</b> | <b>100.000</b> |

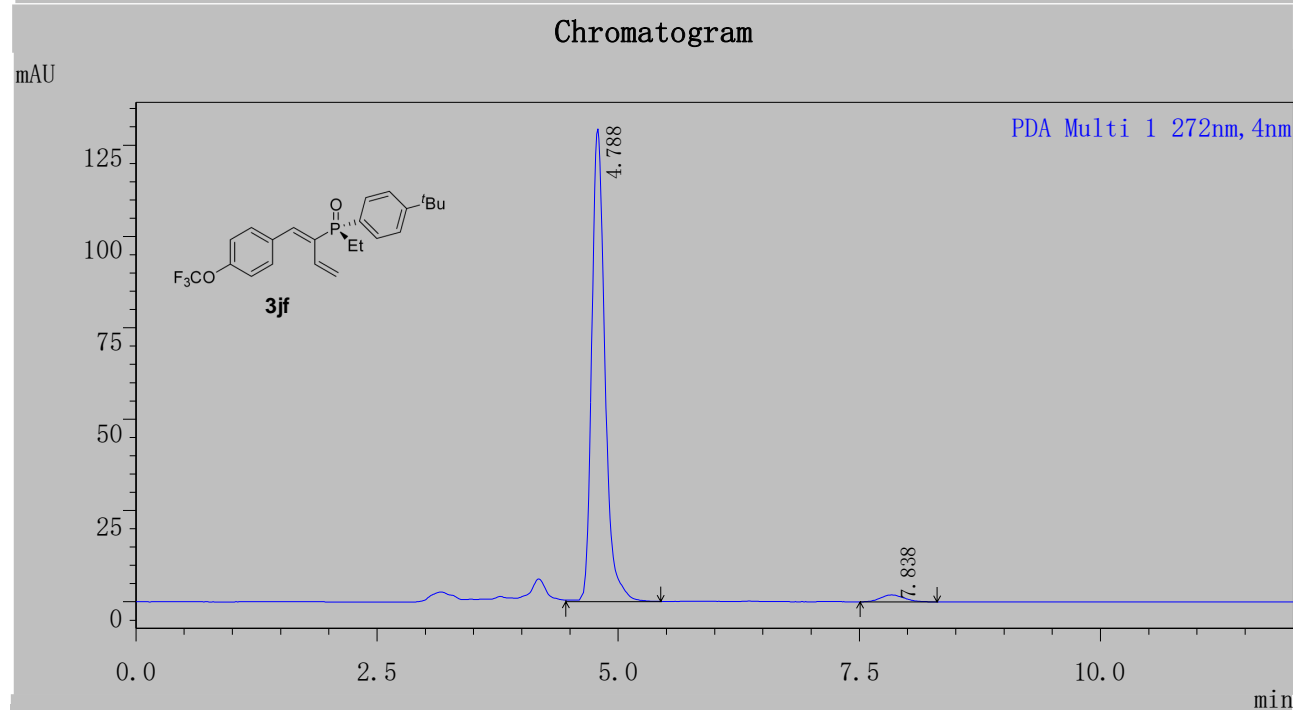

PDA Ch1 272nm

| Peak#        | Ret. Time | Area           | Area%          |
|--------------|-----------|----------------|----------------|
| 1            | 4.788     | 1232286        | 97.422         |
| 2            | 7.838     | 32603          | 2.578          |
| <b>Total</b> |           | <b>1264889</b> | <b>100.000</b> |

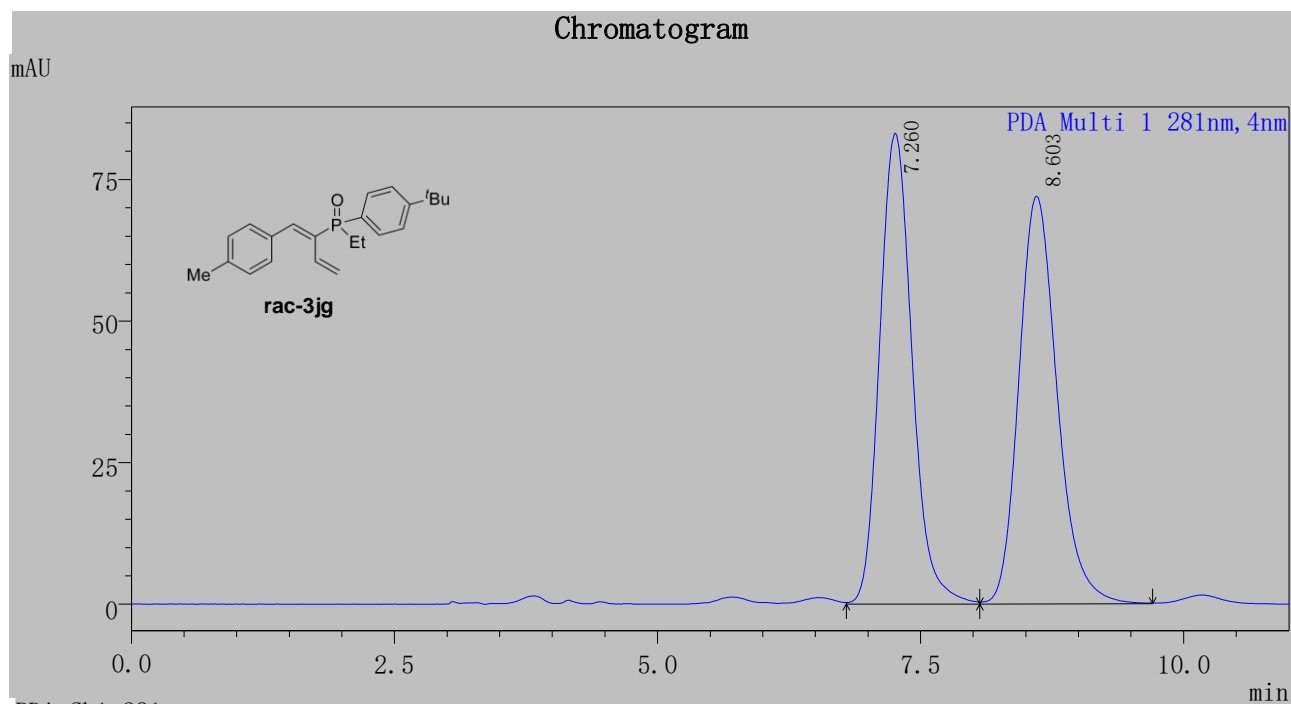

PDA Ch1 281nm

| Peak#        | Ret. Time | Area           | Area%          |
|--------------|-----------|----------------|----------------|
| 1            | 7.260     | 1781023        | 49.499         |
| 2            | 8.603     | 1817051        | 50.501         |
| <b>Total</b> |           | <b>3598074</b> | <b>100.000</b> |

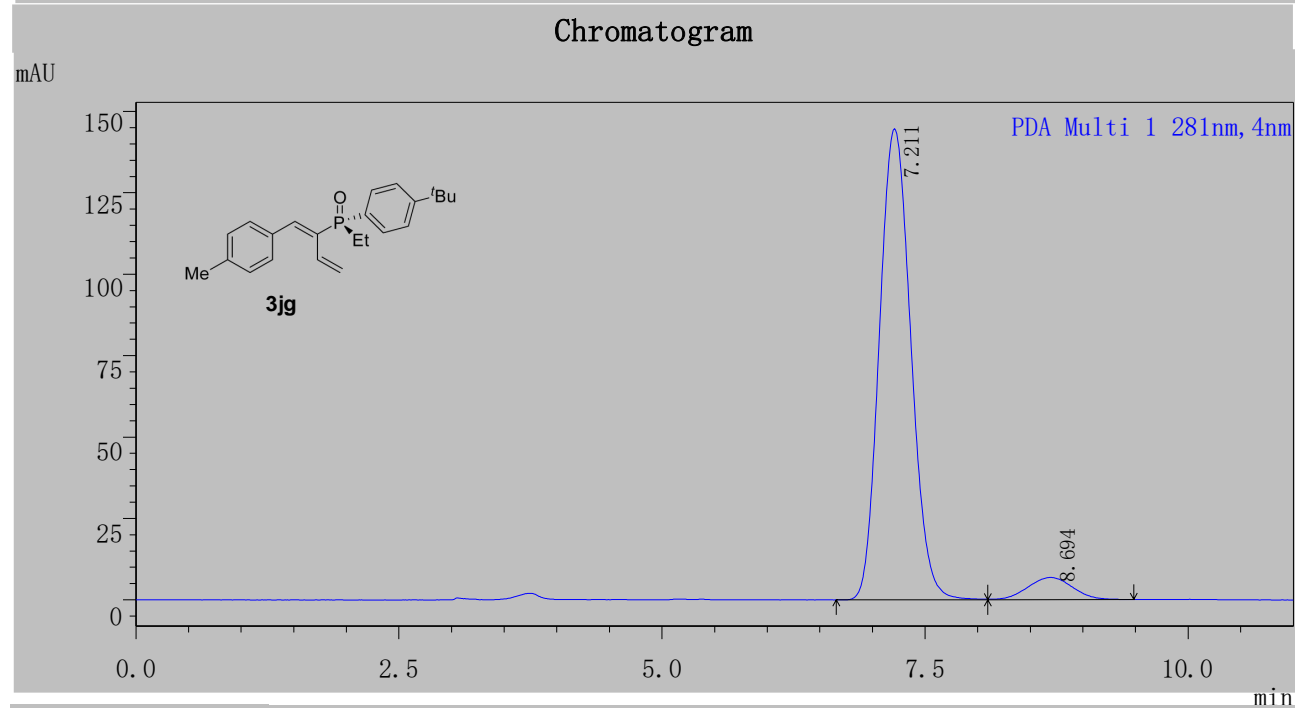

PDA Ch1 281nm

| Peak#        | Ret. Time | Area           | Area%          |
|--------------|-----------|----------------|----------------|
| 1            | 7.211     | 3004033        | 93.709         |
| 2            | 8.694     | 201679         | 6.291          |
| <b>Total</b> |           | <b>3205713</b> | <b>100.000</b> |



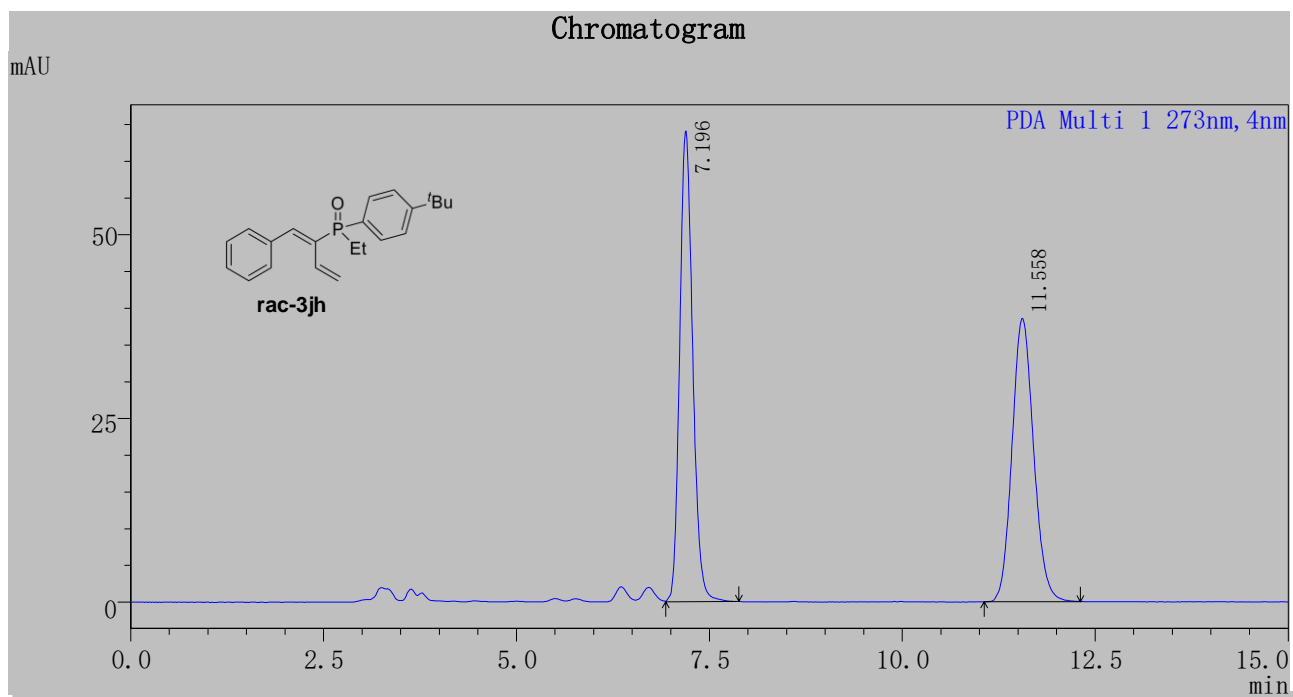

PDA Ch1 273nm

| Peak#        | Ret. Time | Area           | Area%          |
|--------------|-----------|----------------|----------------|
| 1            | 7.196     | 751270         | 50.030         |
| 2            | 11.558    | 750364         | 49.970         |
| <b>Total</b> |           | <b>1501633</b> | <b>100.000</b> |

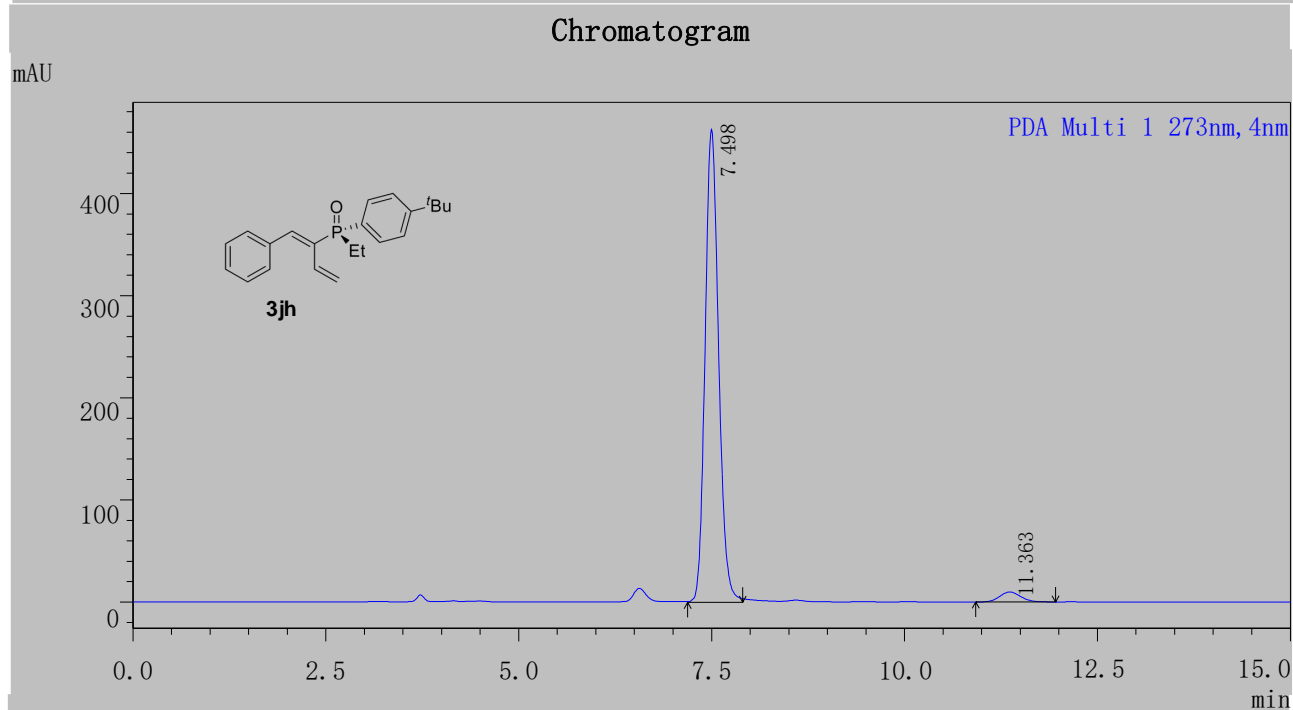

PDA Ch1 273nm

| Peak#        | Ret. Time | Area           | Area%          |
|--------------|-----------|----------------|----------------|
| 1            | 7.498     | 5646809        | 96.805         |
| 2            | 11.363    | 186380         | 3.195          |
| <b>Total</b> |           | <b>5833189</b> | <b>100.000</b> |

## Chromatogram

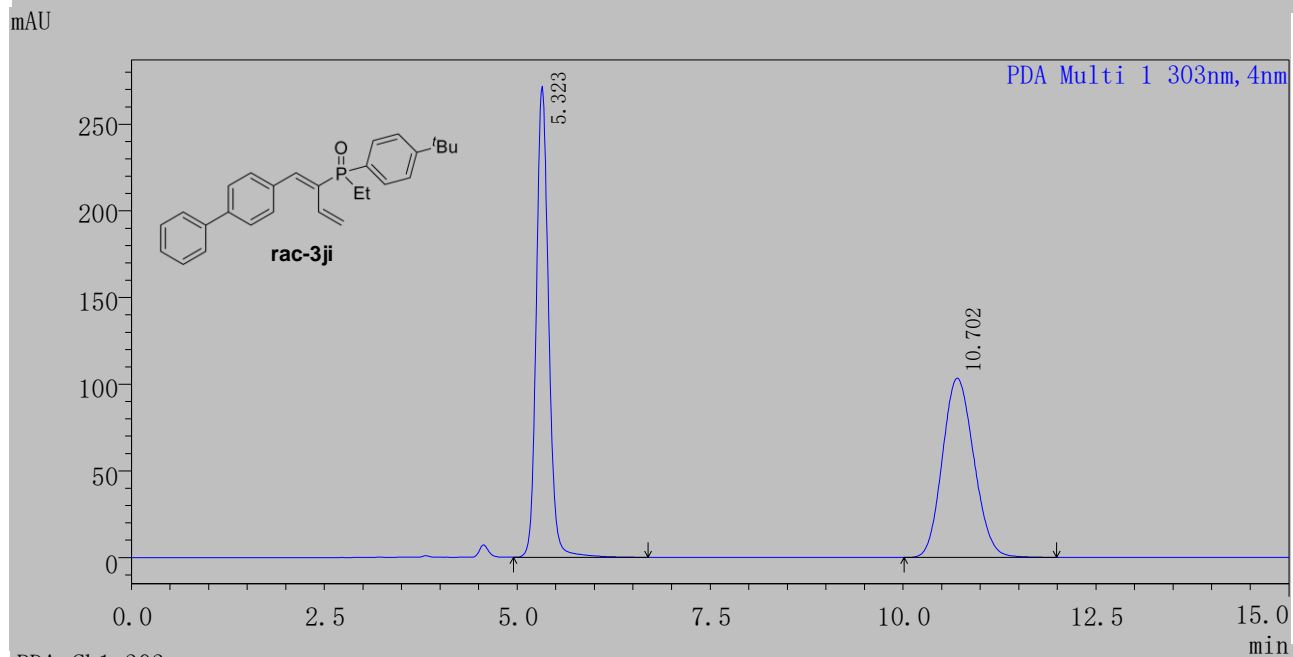

PDA Ch1 303nm

| Peak# | Ret. Time | Area    | Area%   |
|-------|-----------|---------|---------|
| 1     | 5.323     | 3008702 | 50.572  |
| 2     | 10.702    | 2940591 | 49.428  |
| Total |           | 5949293 | 100.000 |

## Chromatogram

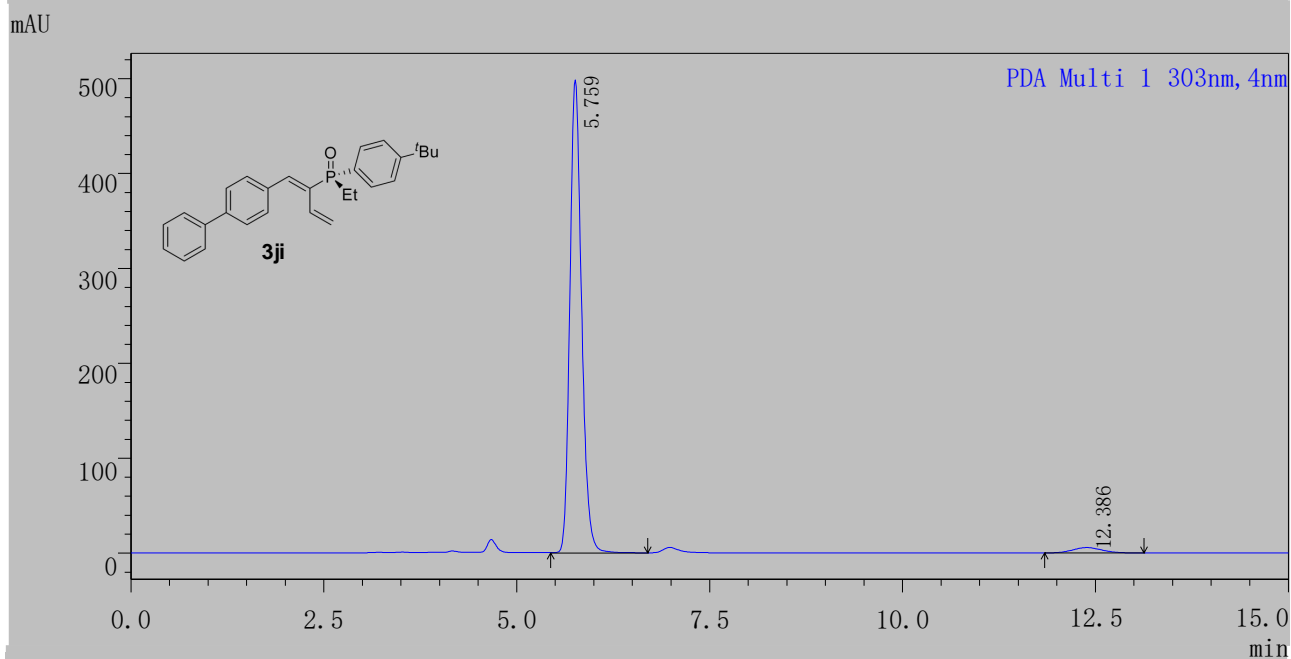

PDA Ch1 303nm

| Peak# | Ret. Time | Area    | Area%   |
|-------|-----------|---------|---------|
| 1     | 5.759     | 5256359 | 97.262  |
| 2     | 12.386    | 147955  | 2.738   |
| Total |           | 5404314 | 100.000 |

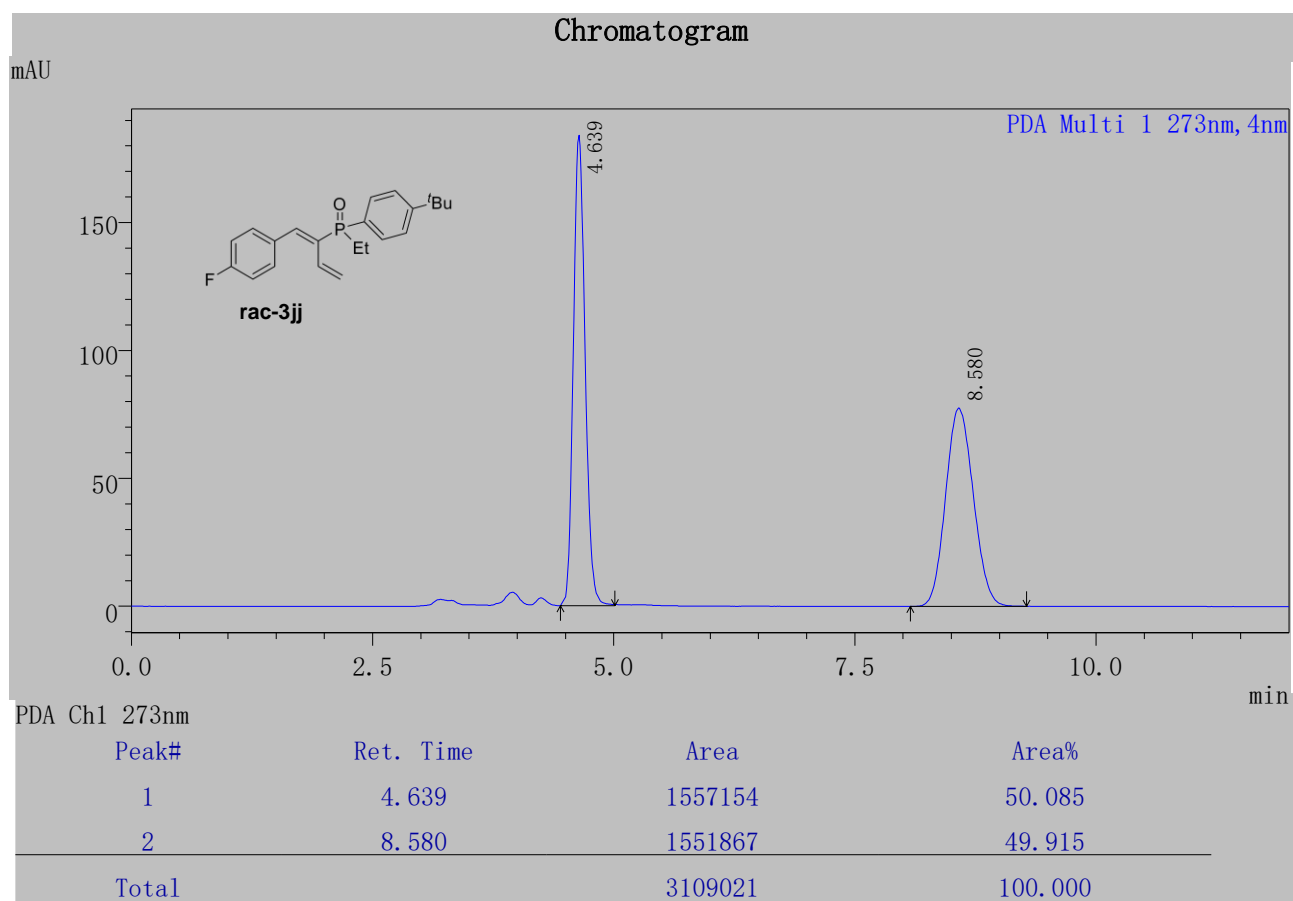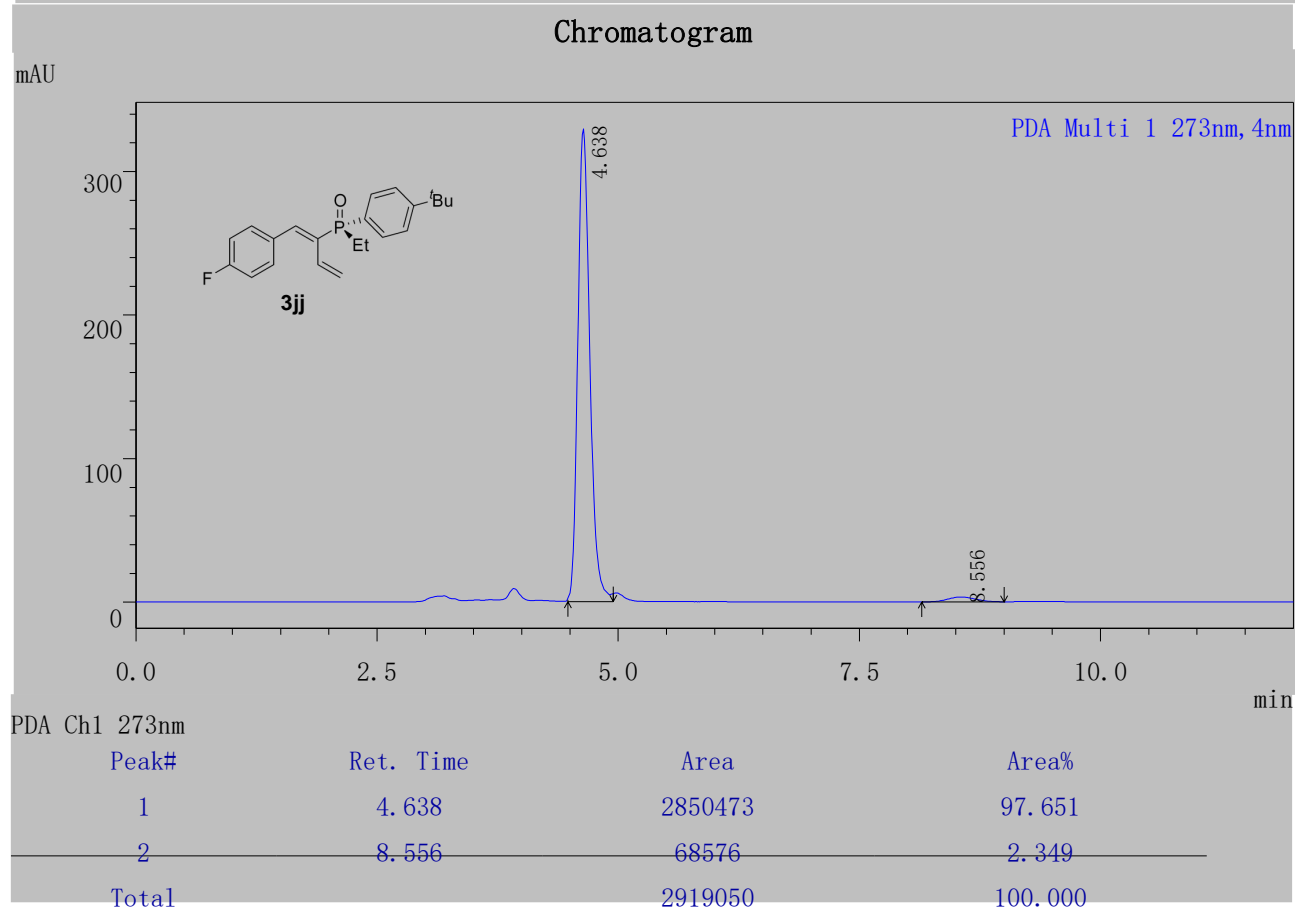

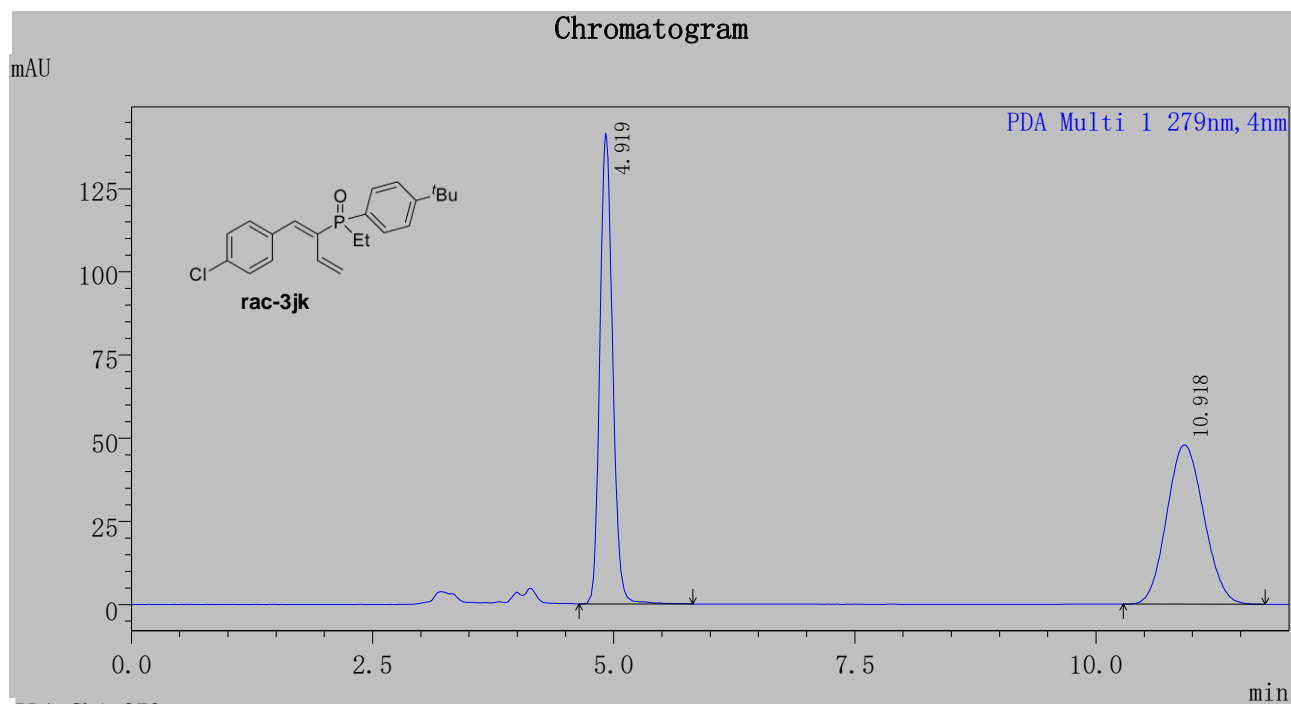

PDA Ch1 279nm

| Peak#        | Ret. Time | Area           | Area%          |
|--------------|-----------|----------------|----------------|
| 1            | 4.919     | 1299431        | 50.339         |
| 2            | 10.918    | 1281905        | 49.661         |
| <b>Total</b> |           | <b>2581336</b> | <b>100.000</b> |

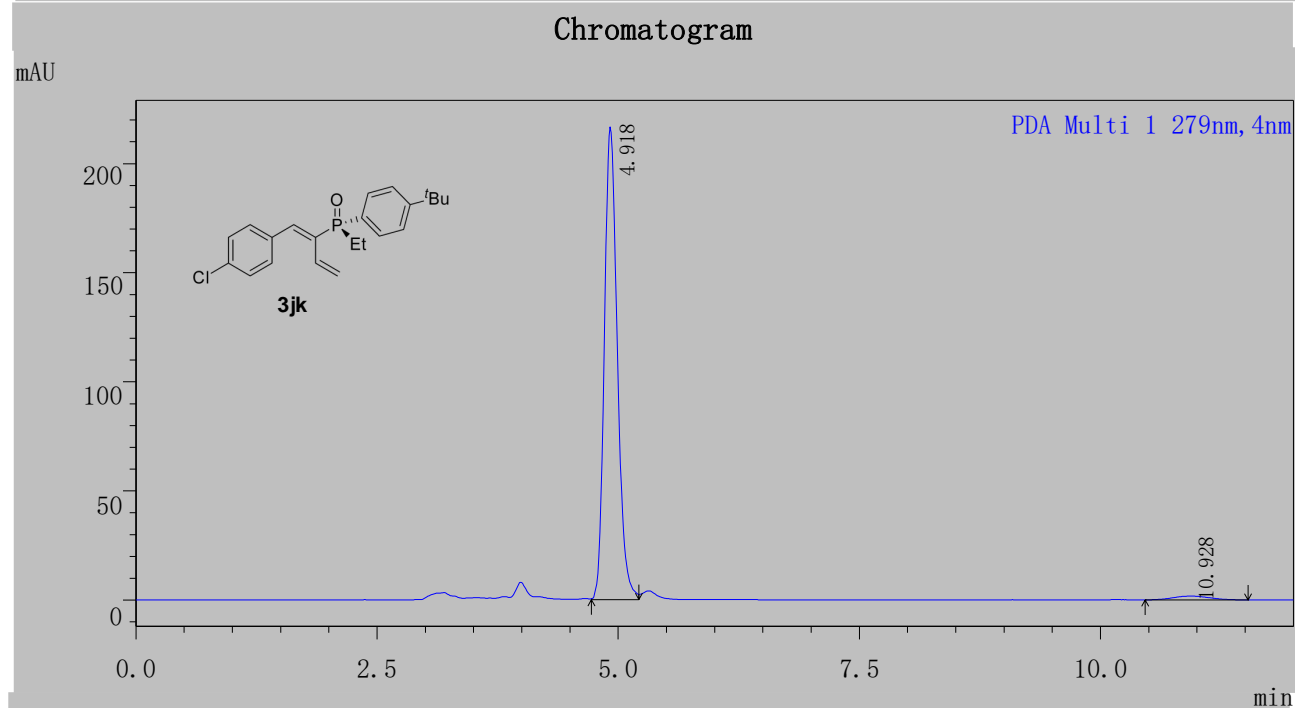

PDA Ch1 279nm

| Peak#        | Ret. Time | Area           | Area%          |
|--------------|-----------|----------------|----------------|
| 1            | 4.918     | 2022148        | 97.801         |
| 2            | 10.928    | 45471          | 2.199          |
| <b>Total</b> |           | <b>2067618</b> | <b>100.000</b> |

## Chromatogram

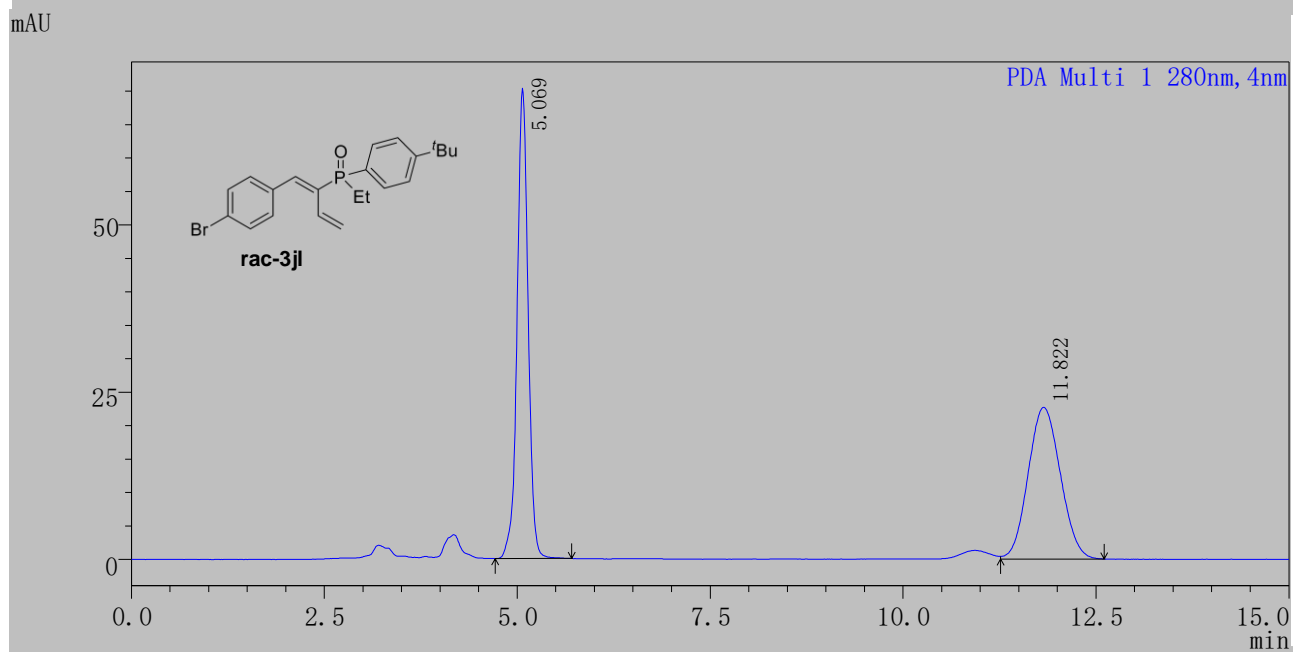

PDA Ch1 280nm

| Peak#        | Ret. Time | Area           | Area%          |
|--------------|-----------|----------------|----------------|
| 1            | 5.069     | 698973         | 51.485         |
| 2            | 11.822    | 658647         | 48.515         |
| <b>Total</b> |           | <b>1357620</b> | <b>100.000</b> |

## Chromatogram

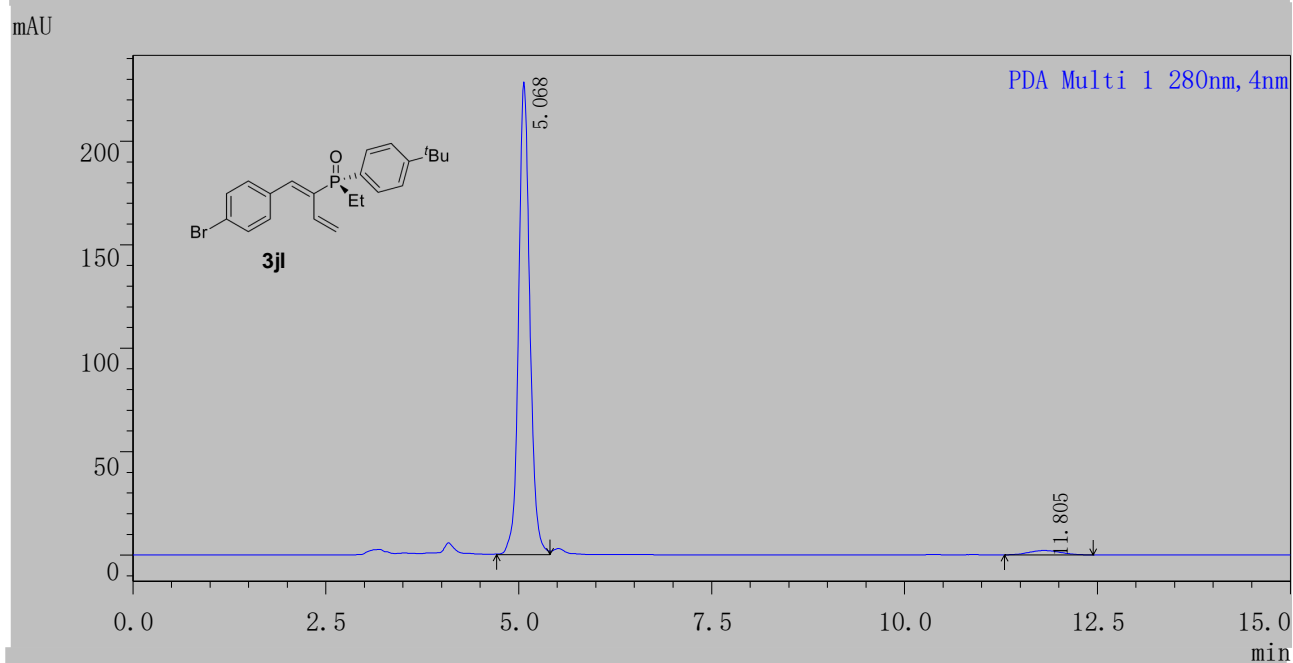

PDA Ch1 280nm

| Peak#        | Ret. Time | Area           | Area%          |
|--------------|-----------|----------------|----------------|
| 1            | 5.068     | 2300025        | 97.432         |
| 2            | 11.805    | 60613          | 2.568          |
| <b>Total</b> |           | <b>2360638</b> | <b>100.000</b> |

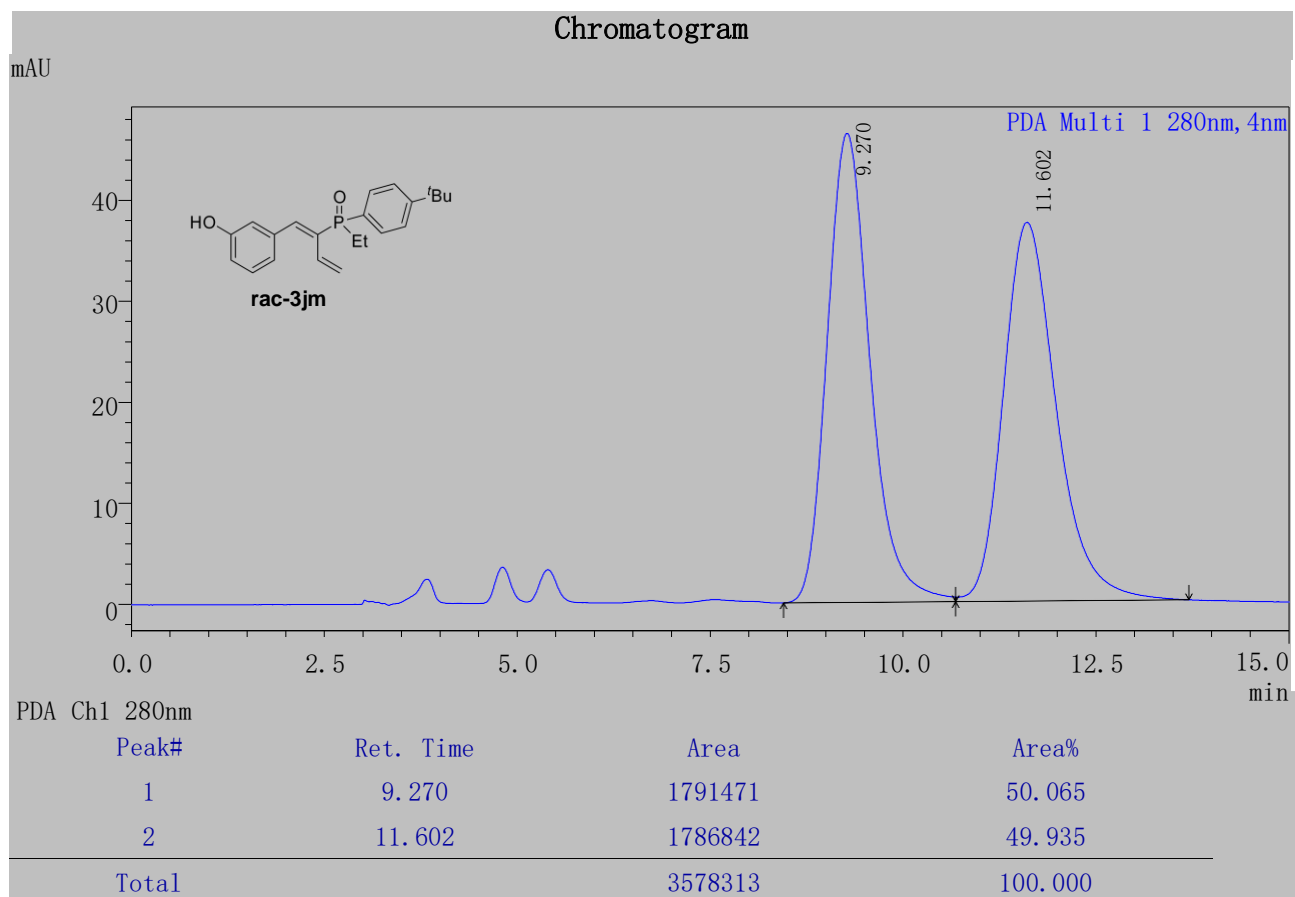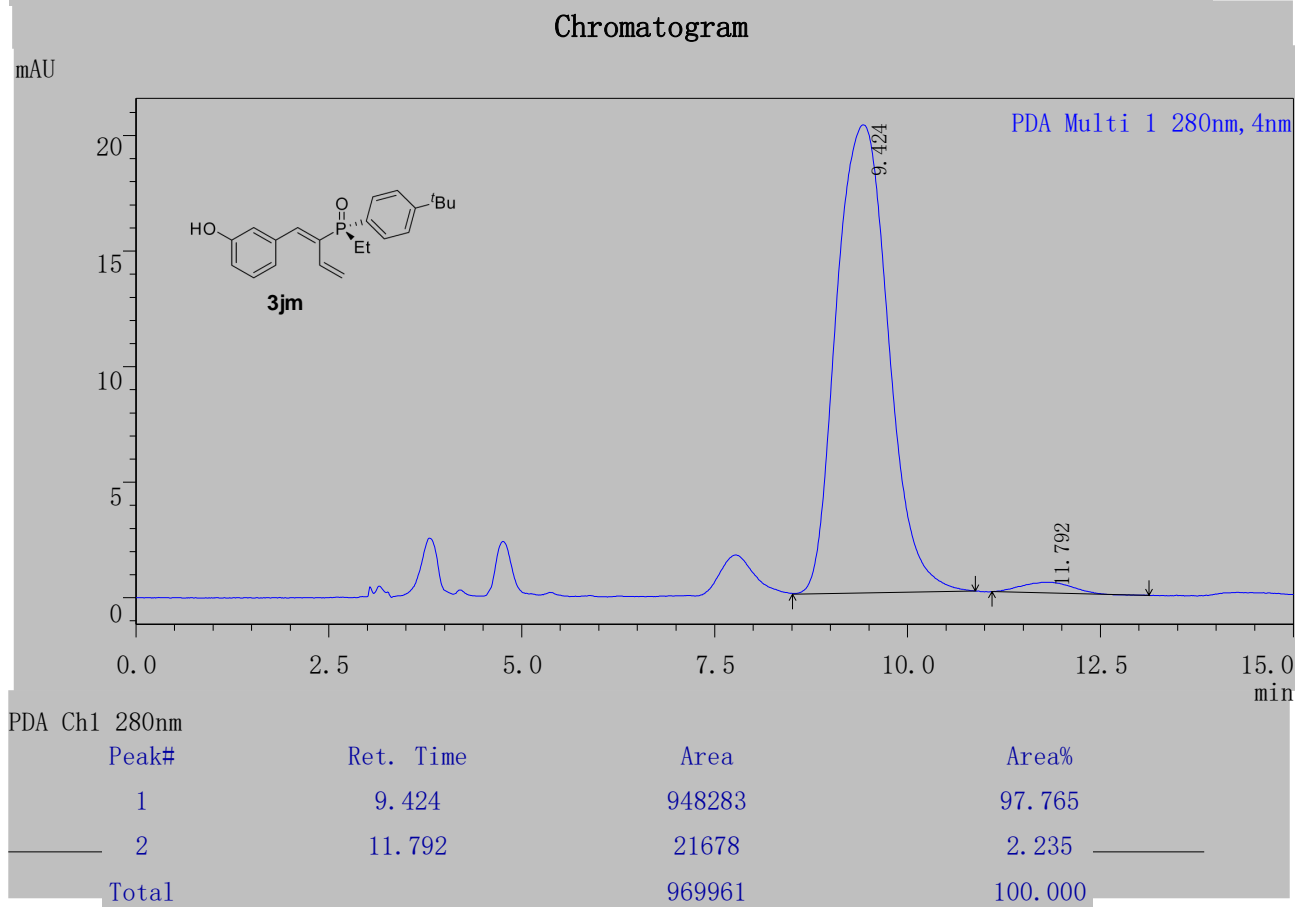

## Chromatogram

mAU

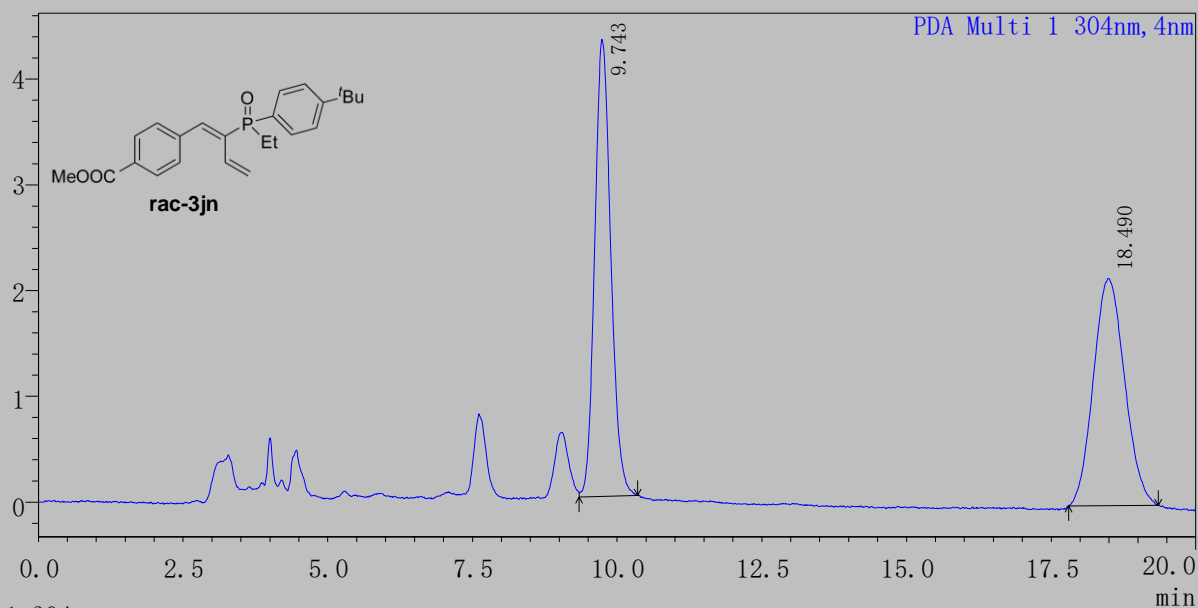

PDA Multi 1 304nm, 4nm

PDA Ch1 304nm

| Peak# | Ret. Time | Area   | Area%   |
|-------|-----------|--------|---------|
| 1     | 9.743     | 83263  | 50.762  |
| 2     | 18.490    | 80763  | 49.238  |
| Total |           | 164026 | 100.000 |

## Chromatogram

mAU

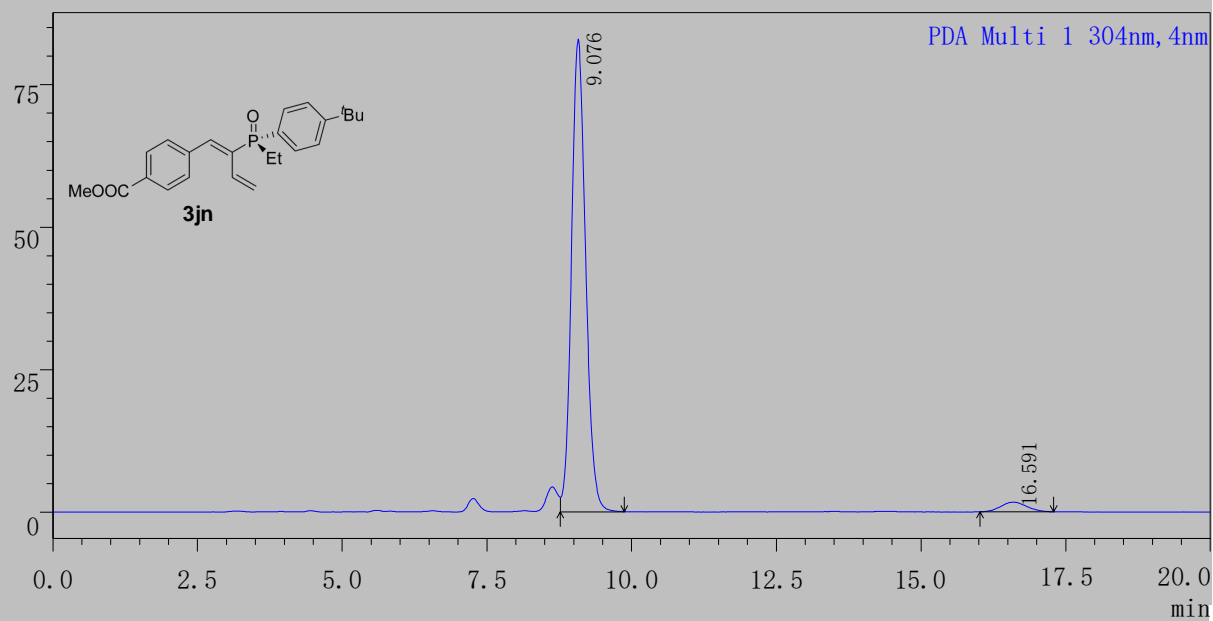

PDA Multi 1 304nm, 4nm

PDA Ch1 304nm

| Peak# | Ret. Time | Area    | Area%   |
|-------|-----------|---------|---------|
| 1     | 9.076     | 1406398 | 96.366  |
| 2     | 16.591    | 53039   | 3.634   |
| Total |           | 1459437 | 100.000 |

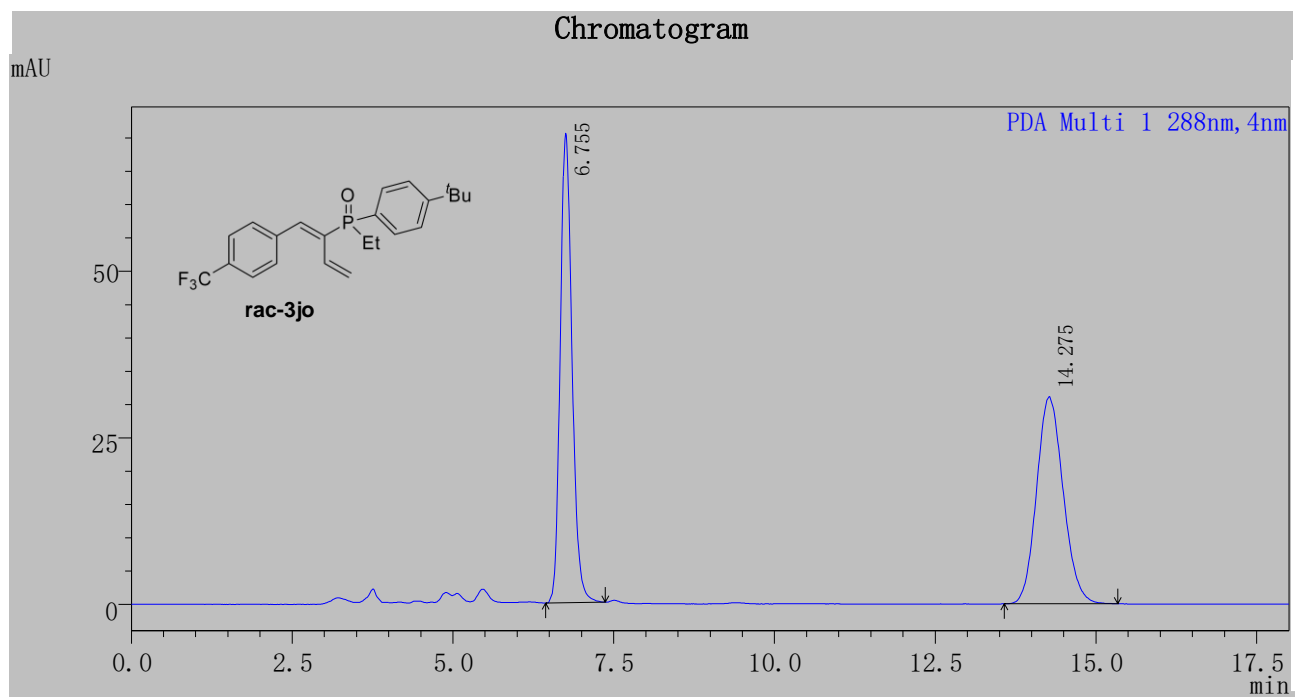

PDA Ch1 288nm

| Peak#        | Ret. Time | Area           | Area%          |
|--------------|-----------|----------------|----------------|
| 1            | 6.755     | 893376         | 49.926         |
| 2            | 14.275    | 896017         | 50.074         |
| <b>Total</b> |           | <b>1789393</b> | <b>100.000</b> |

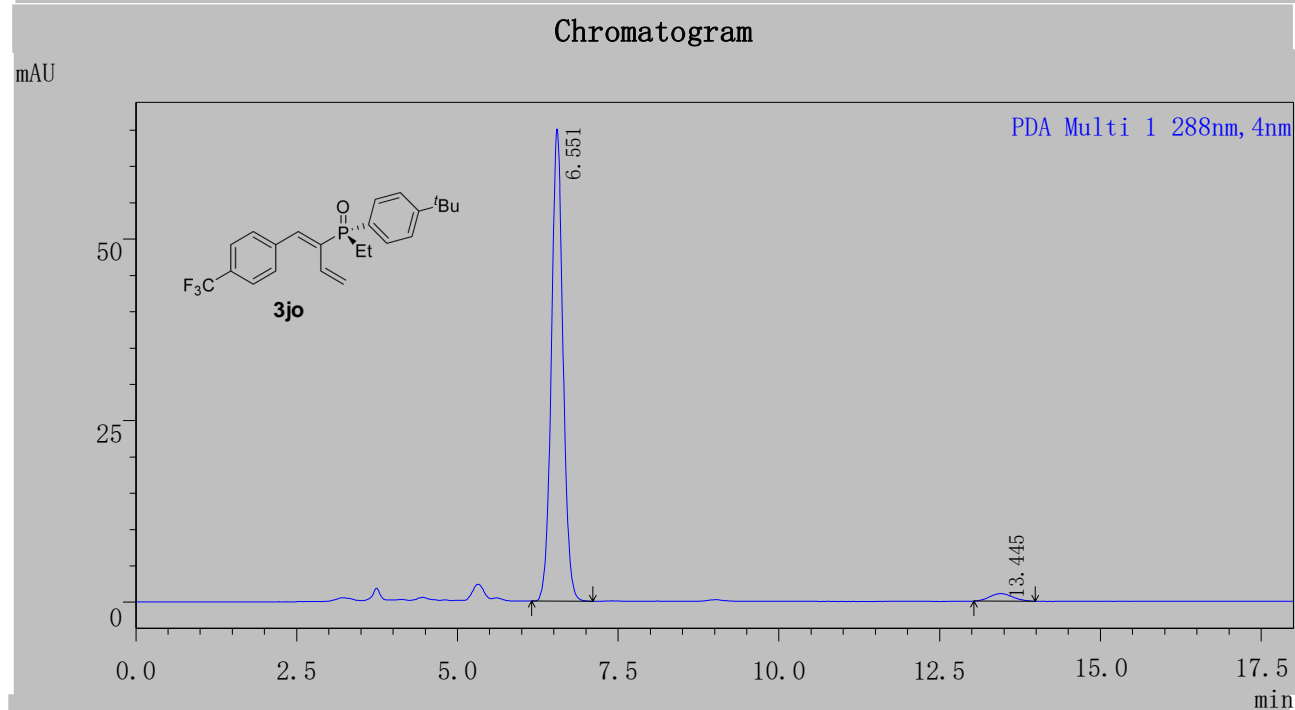

PDA Ch1 288nm

| Peak#        | Ret. Time | Area          | Area%          |
|--------------|-----------|---------------|----------------|
| 1            | 6.551     | 824915        | 96.994         |
| 2            | 13.445    | 25570         | 3.006          |
| <b>Total</b> |           | <b>850484</b> | <b>100.000</b> |



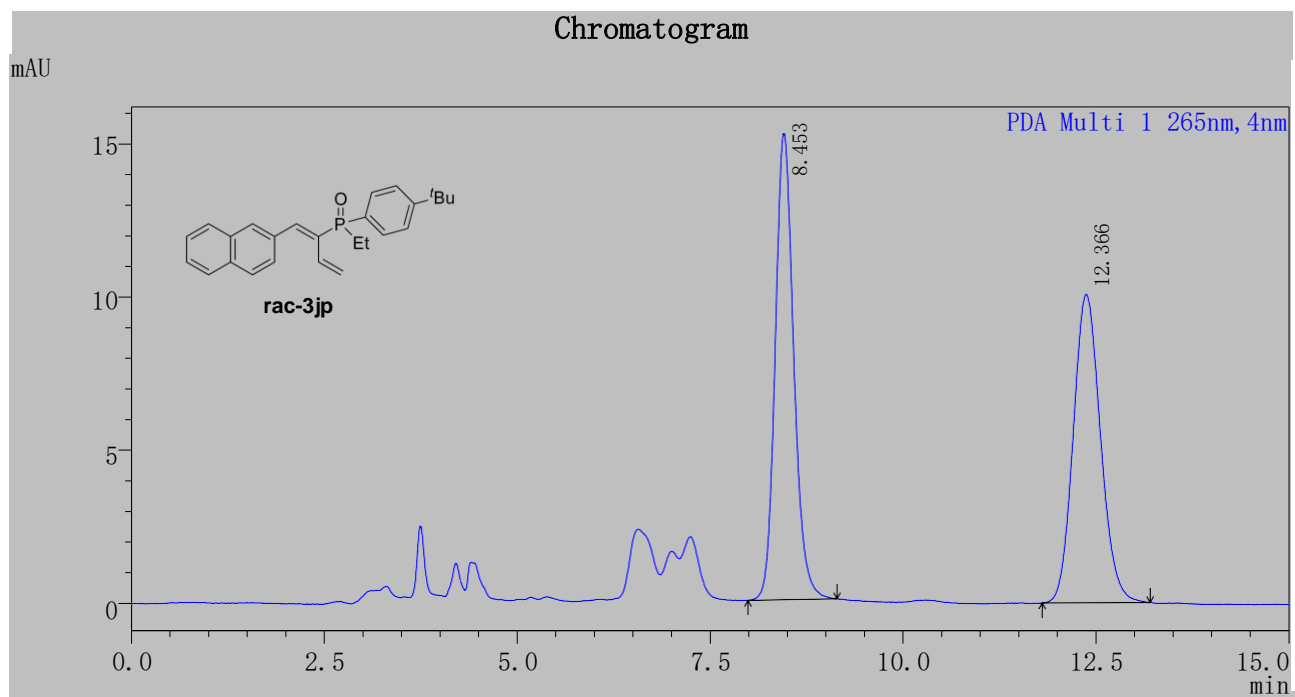

PDA Ch1 265nm

| Peak#        | Ret. Time | Area          | Area%          |
|--------------|-----------|---------------|----------------|
| 1            | 8.453     | 253919        | 50.627         |
| 2            | 12.366    | 247634        | 49.373         |
| <b>Total</b> |           | <b>501553</b> | <b>100.000</b> |

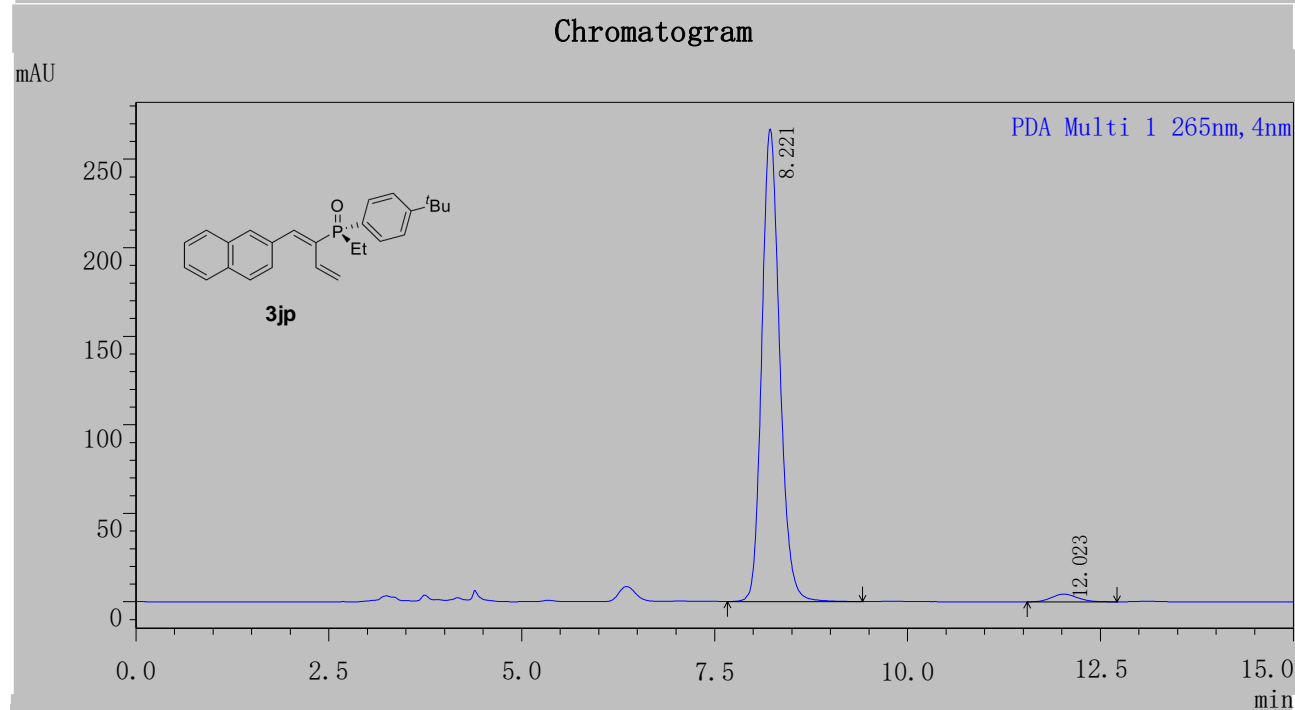

PDA Ch1 265nm

| Peak#        | Ret. Time | Area           | Area%          |
|--------------|-----------|----------------|----------------|
| 1            | 8.221     | 4298086        | 97.676         |
| 2            | 12.023    | 102258         | 2.324          |
| <b>Total</b> |           | <b>4400344</b> | <b>100.000</b> |

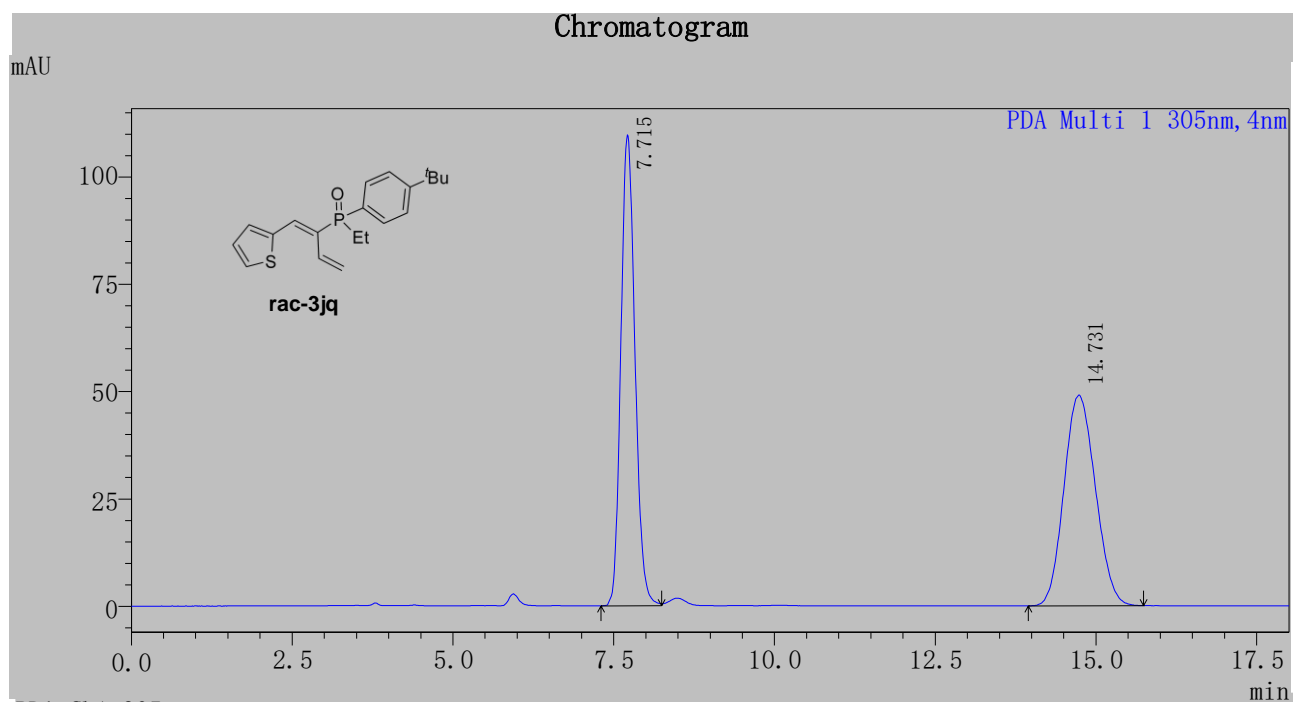

PDA Ch1 305nm

| Peak#        | Ret. Time | Area           | Area%          |
|--------------|-----------|----------------|----------------|
| 1            | 7.715     | 1675284        | 50.070         |
| 2            | 14.731    | 1670624        | 49.930         |
| <b>Total</b> |           | <b>3345908</b> | <b>100.000</b> |

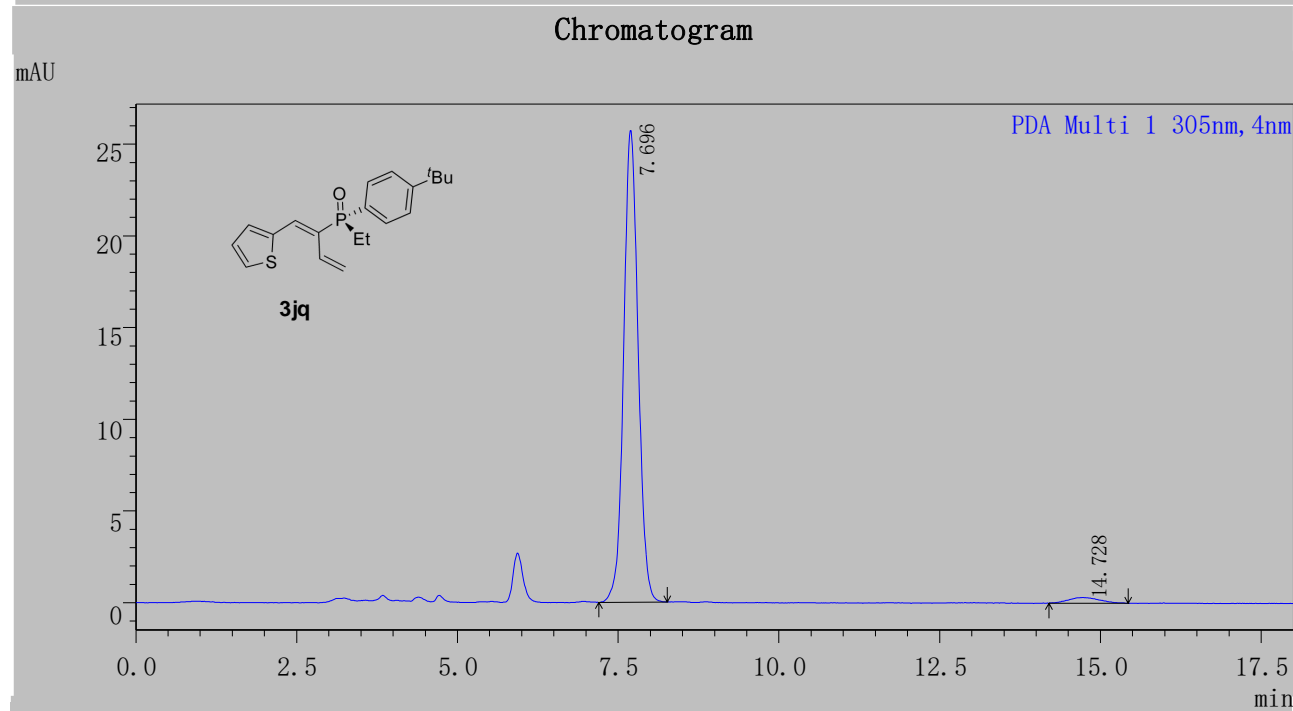

PDA Ch1 305nm

| Peak#        | Ret. Time | Area          | Area%          |
|--------------|-----------|---------------|----------------|
| 1            | 7.696     | 402478        | 97.484         |
| 2            | 14.728    | 10389         | 2.516          |
| <b>Total</b> |           | <b>412867</b> | <b>100.000</b> |

## Chromatogram

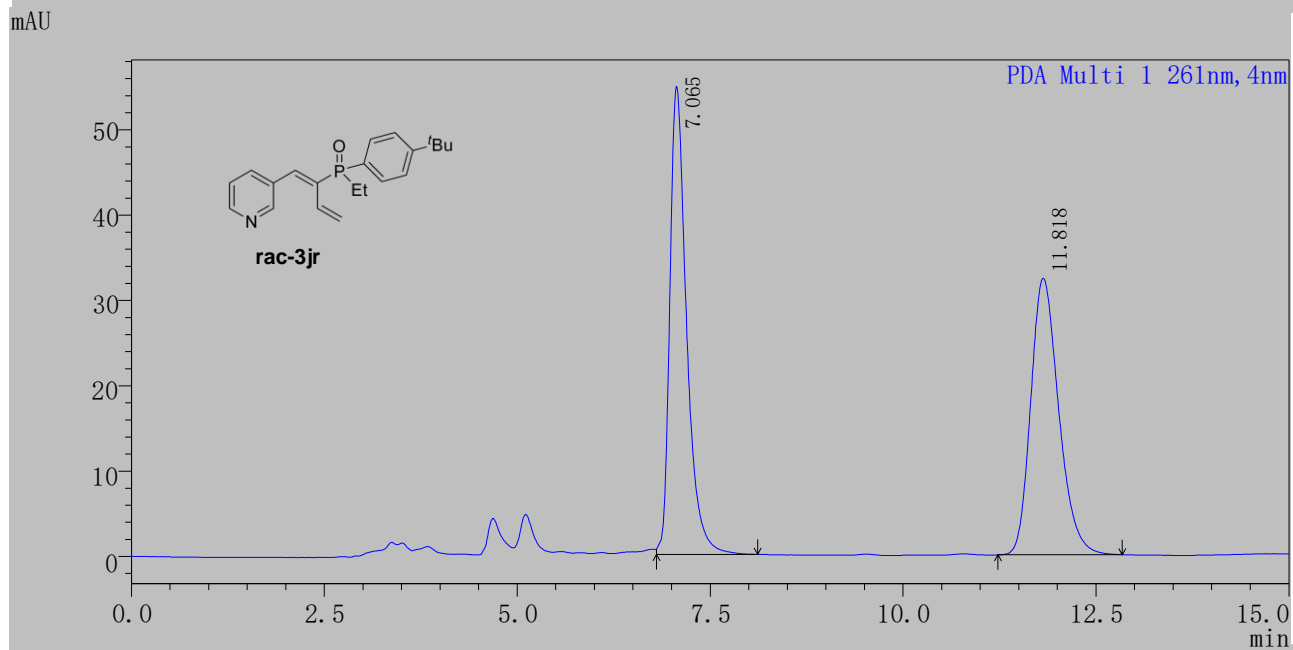

PDA Ch1 261nm

| Peak#        | Ret. Time | Area           | Area%          |
|--------------|-----------|----------------|----------------|
| 1            | 7.065     | 828156         | 50.294         |
| 2            | 11.818    | 818471         | 49.706         |
| <b>Total</b> |           | <b>1646626</b> | <b>100.000</b> |

## Chromatogram

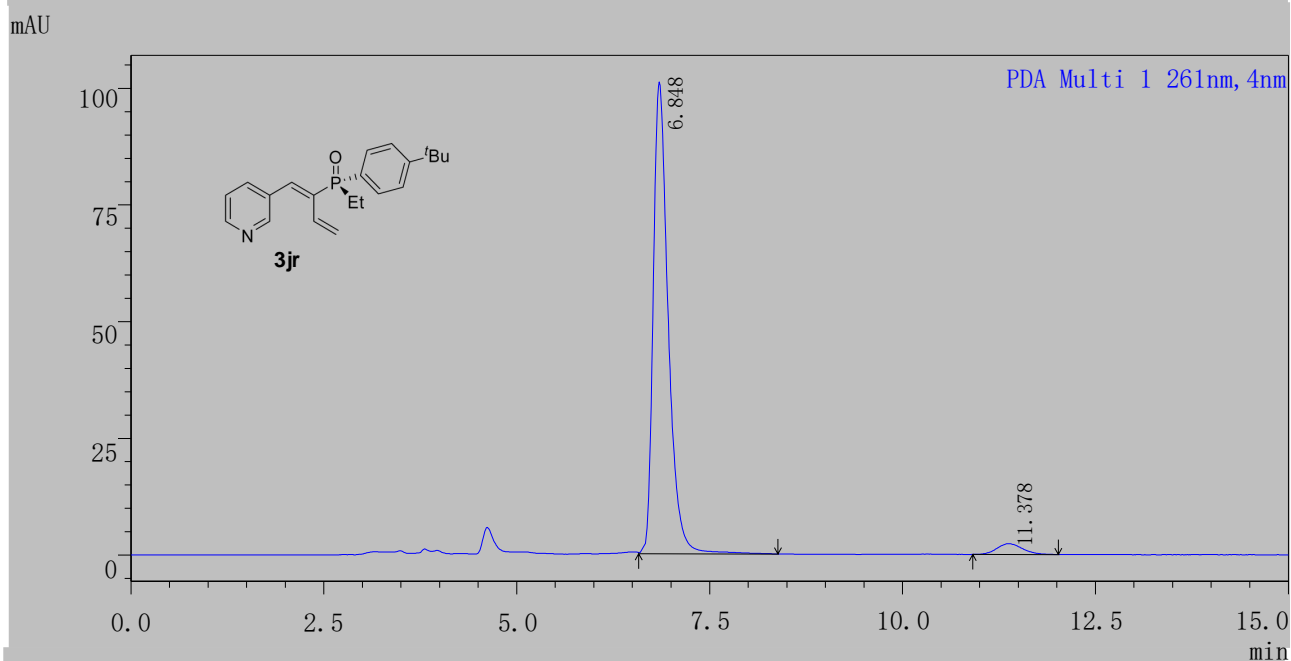

PDA Ch1 261nm

| Peak#        | Ret. Time | Area           | Area%          |
|--------------|-----------|----------------|----------------|
| 1            | 6.848     | 1364398        | 96.212         |
| 2            | 11.378    | 53723          | 3.788          |
| <b>Total</b> |           | <b>1418120</b> | <b>100.000</b> |

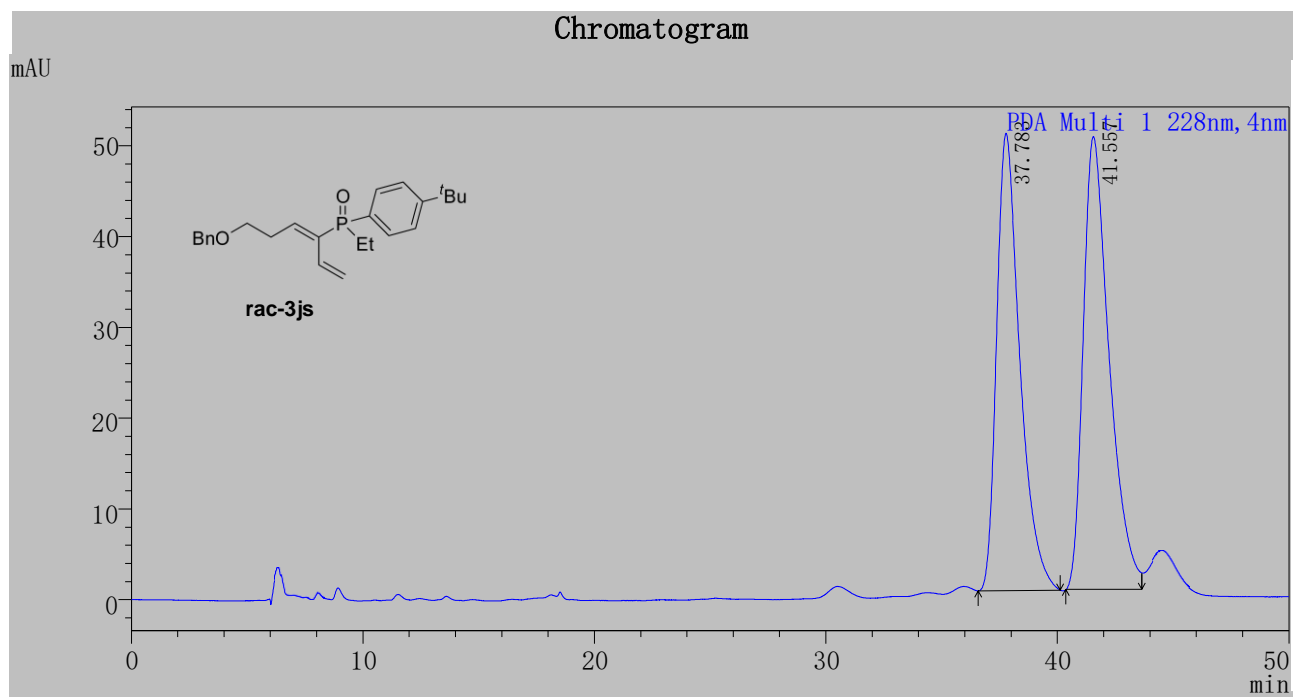

PDA Ch1 228nm

| Peak#        | Ret. Time | Area           | Area%          |
|--------------|-----------|----------------|----------------|
| 1            | 37.783    | 3528024        | 47.607         |
| 2            | 41.557    | 3882683        | 52.393         |
| <b>Total</b> |           | <b>7410707</b> | <b>100.000</b> |

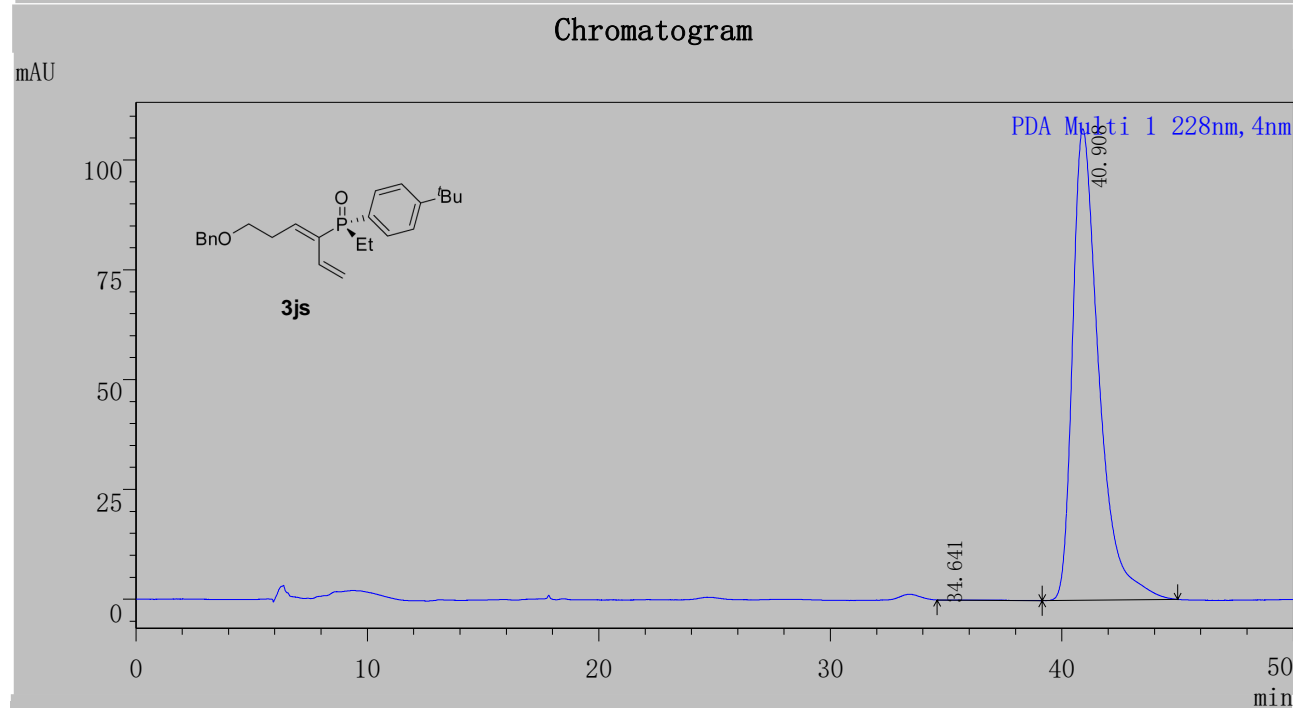

PDA Ch1 228nm

| Peak#        | Ret. Time | Area           | Area%          |
|--------------|-----------|----------------|----------------|
| 1            | 34.641    | 2222           | 0.026          |
| 2            | 40.908    | 8465432        | 99.974         |
| <b>Total</b> |           | <b>8467654</b> | <b>100.000</b> |

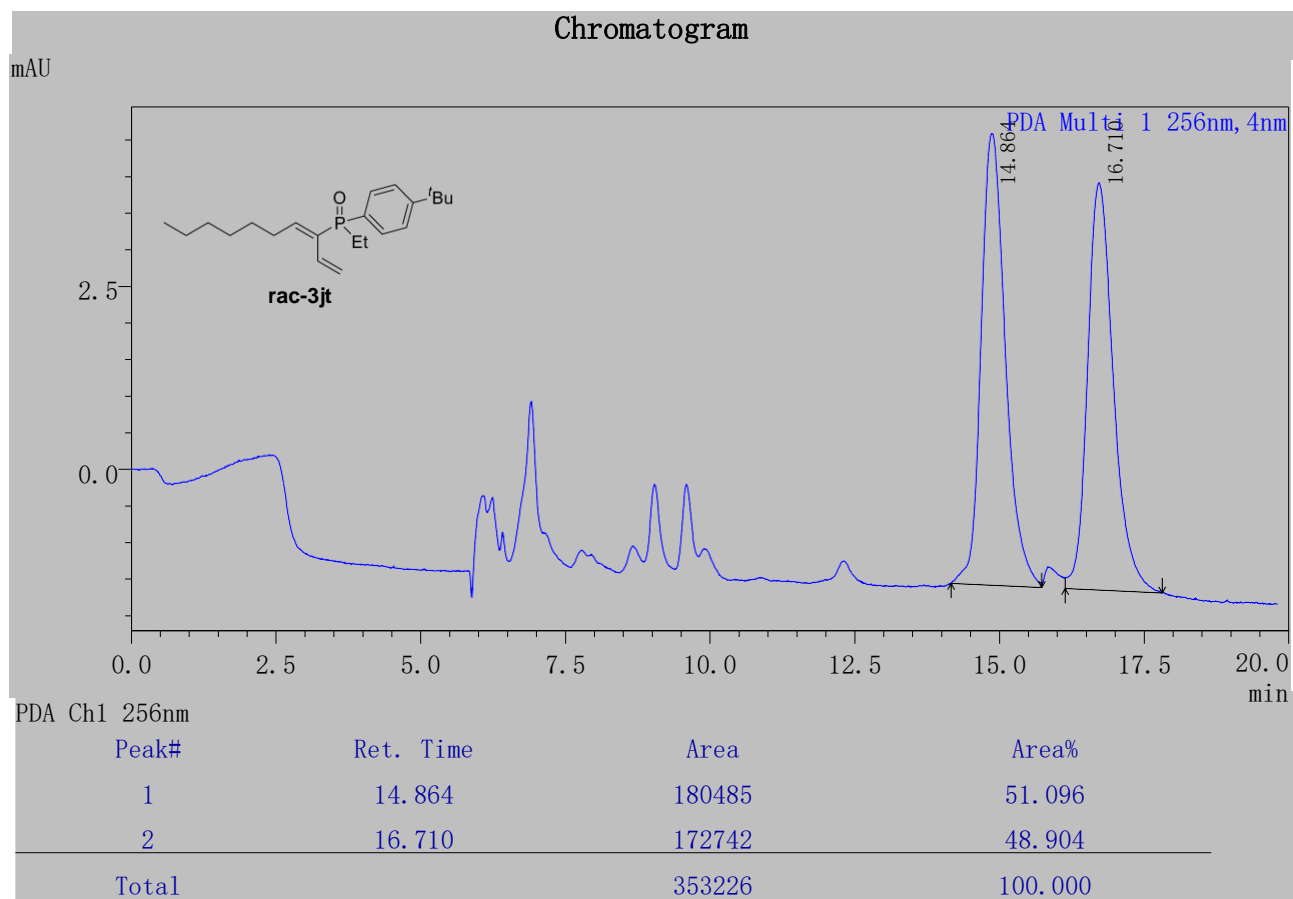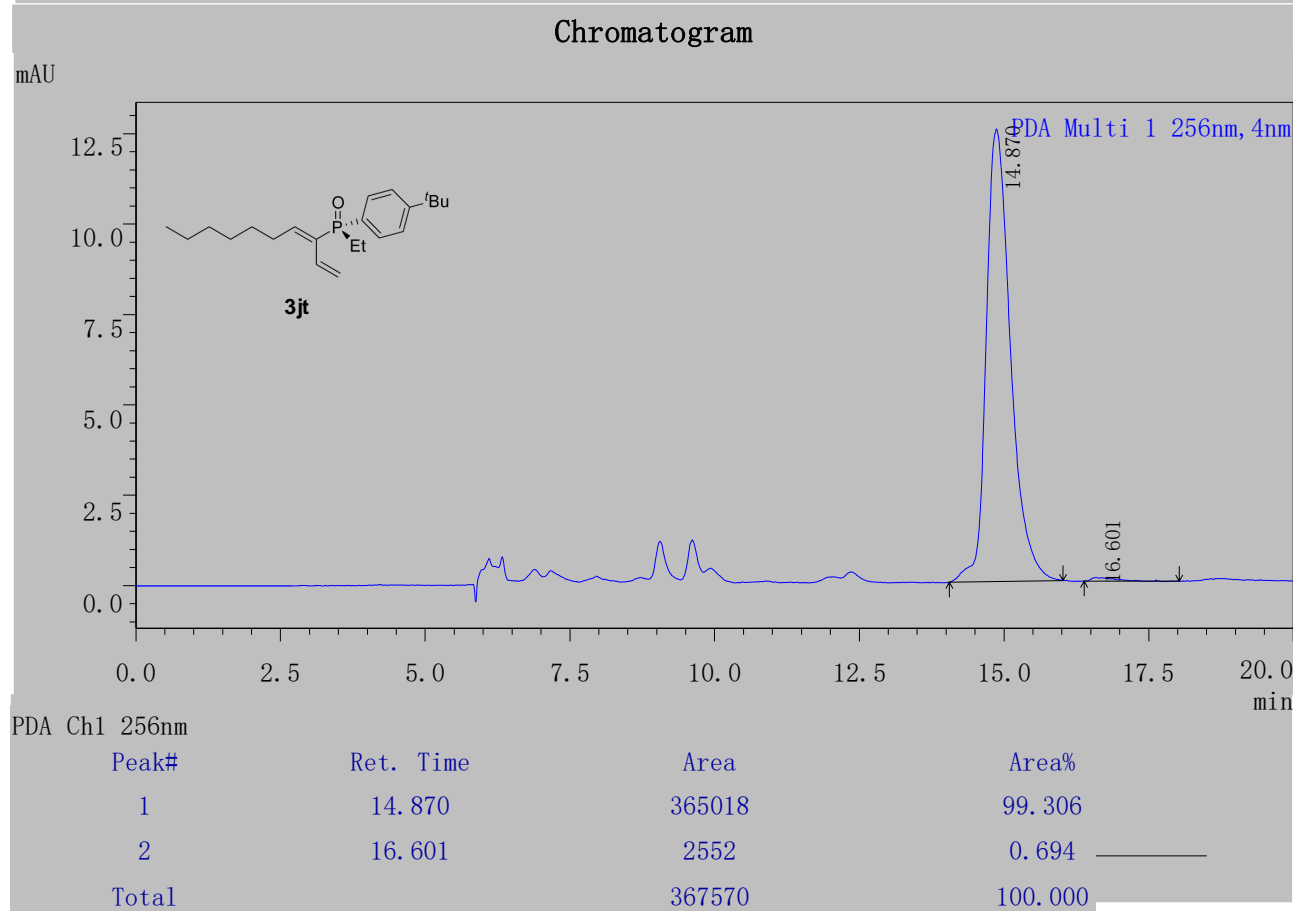

## Chromatogram

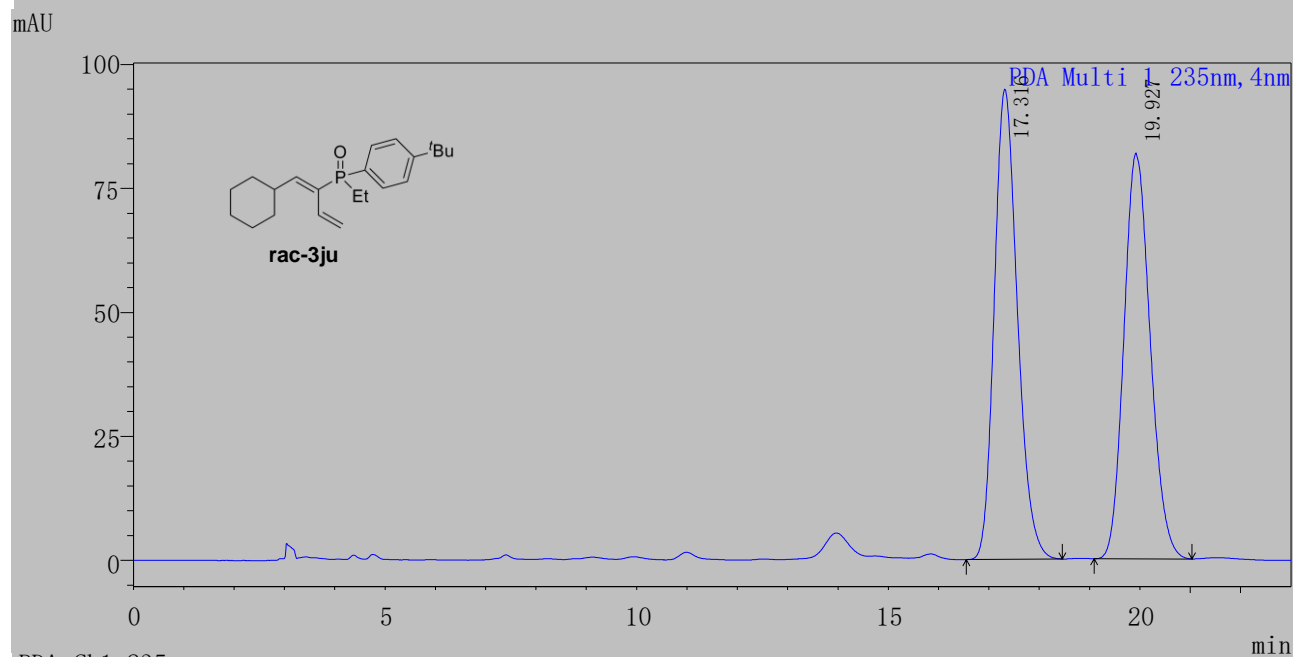

PDA Ch1 235nm

| Peak# | Ret. Time | Area    | Area%   |
|-------|-----------|---------|---------|
| 1     | 17.316    | 3028071 | 50.483  |
| 2     | 19.927    | 2970073 | 49.517  |
| Total |           | 5998145 | 100.000 |

## Chromatogram

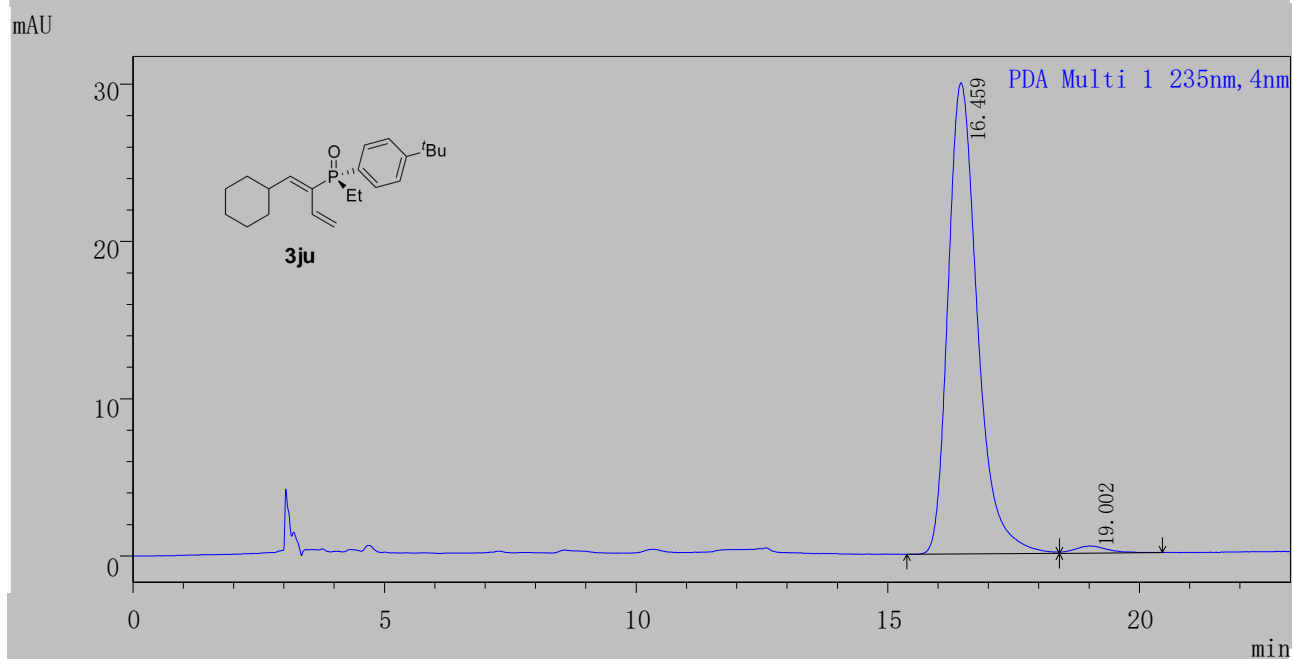

PDA Ch1 235nm

| Peak# | Ret. Time | Area    | Area%   |
|-------|-----------|---------|---------|
| 1     | 16.459    | 1213909 | 98.402  |
| 2     | 19.002    | 19708   | 1.598   |
| Total |           | 1233617 | 100.000 |

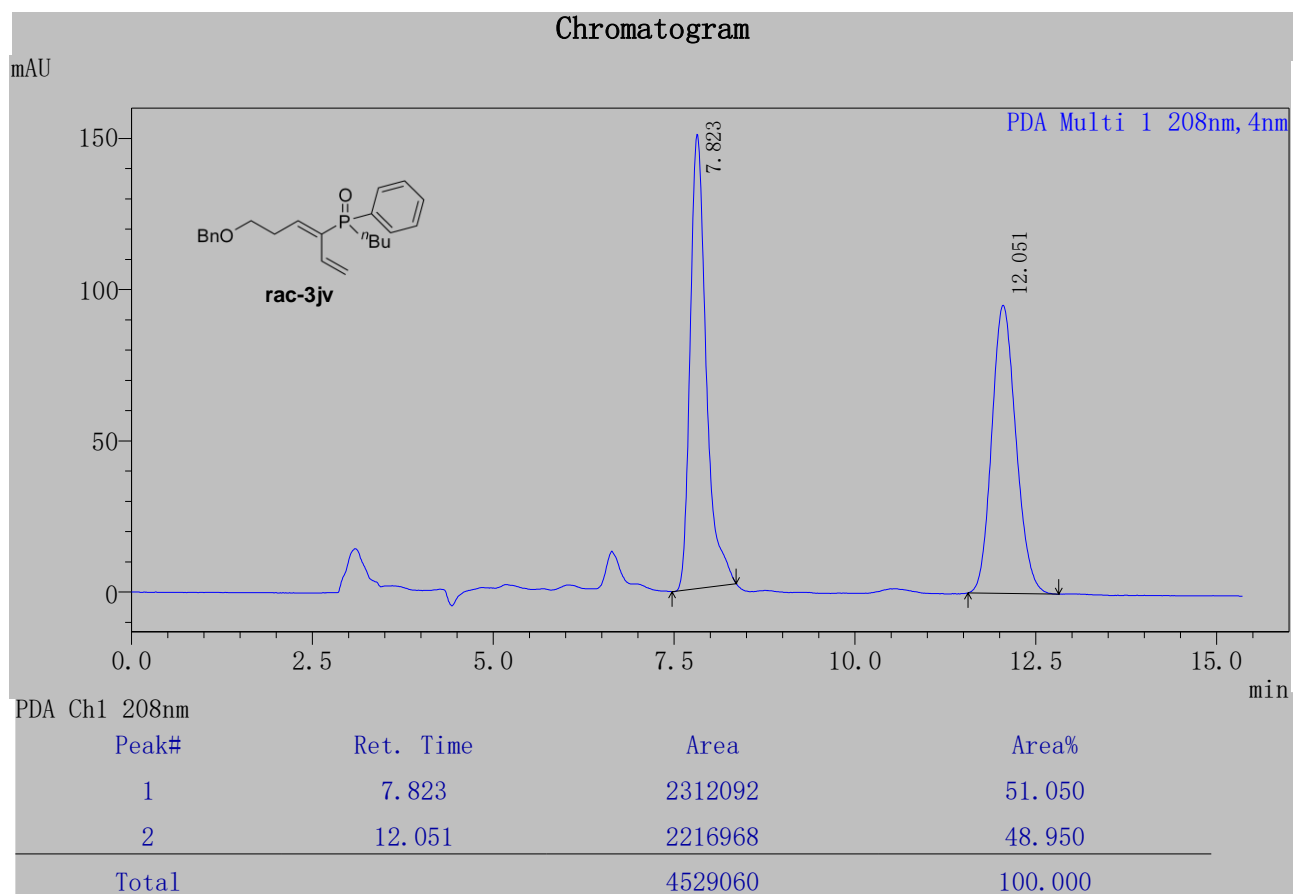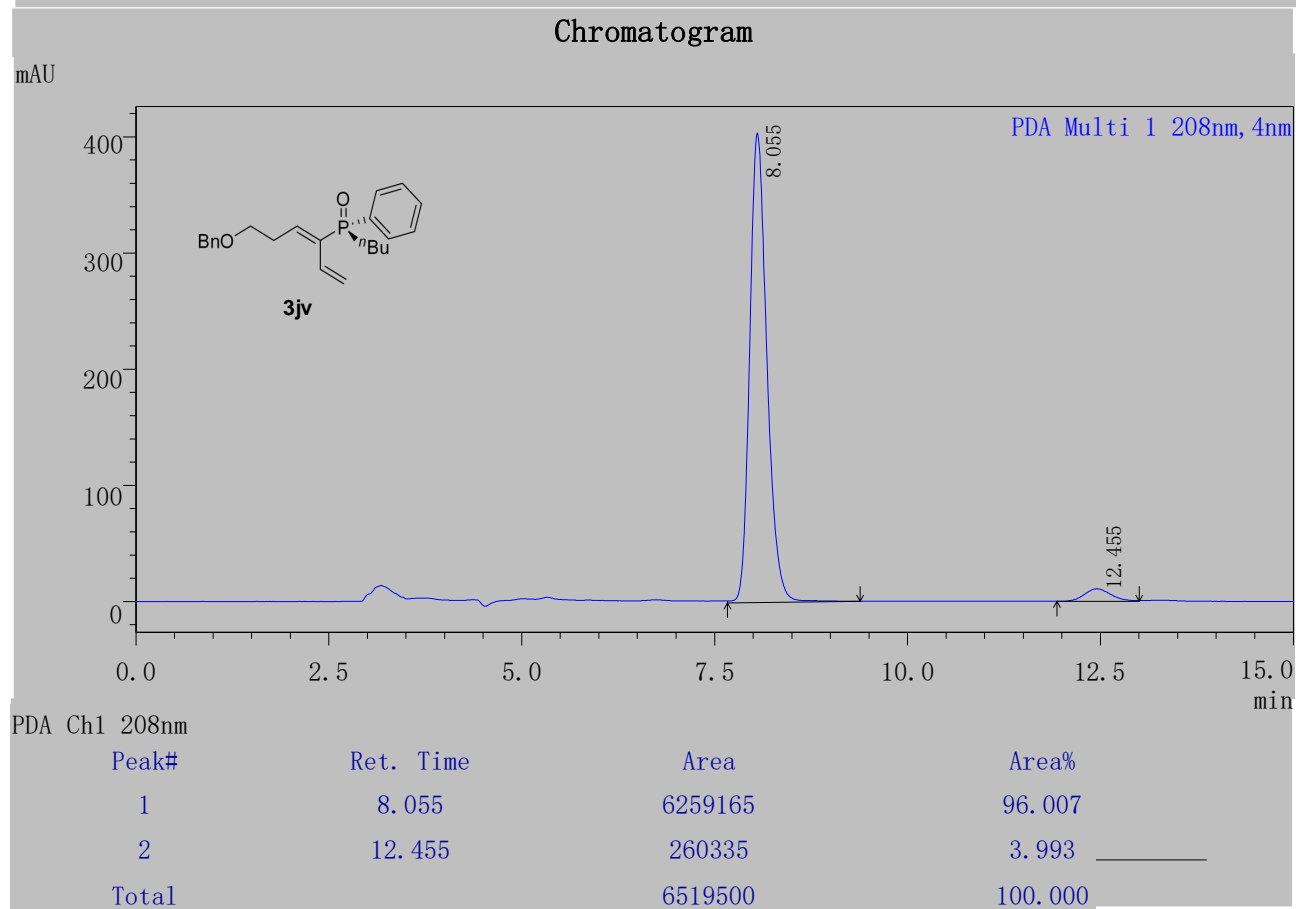

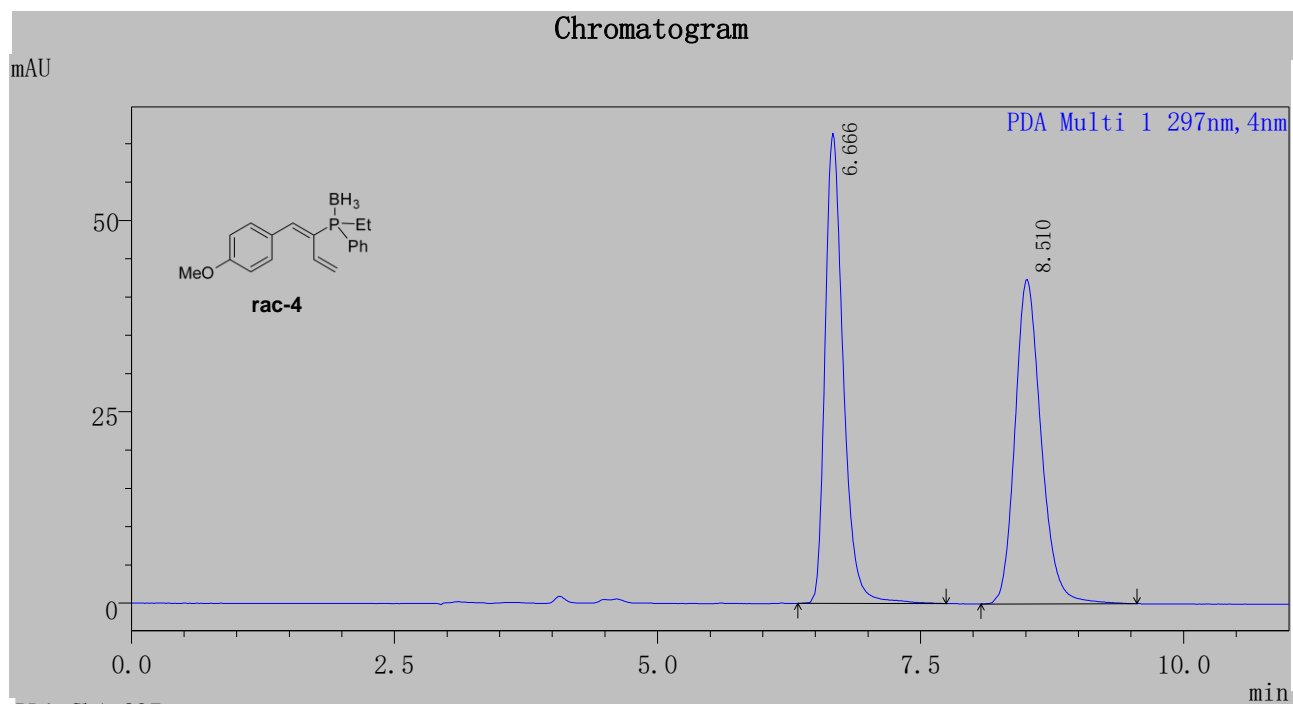

PDA Ch1 297nm

| Peak#        | Ret. Time | Area           | Area%          |
|--------------|-----------|----------------|----------------|
| 1            | 6.666     | 734780         | 50.095         |
| 2            | 8.510     | 731994         | 49.905         |
| <b>Total</b> |           | <b>1466774</b> | <b>100.000</b> |

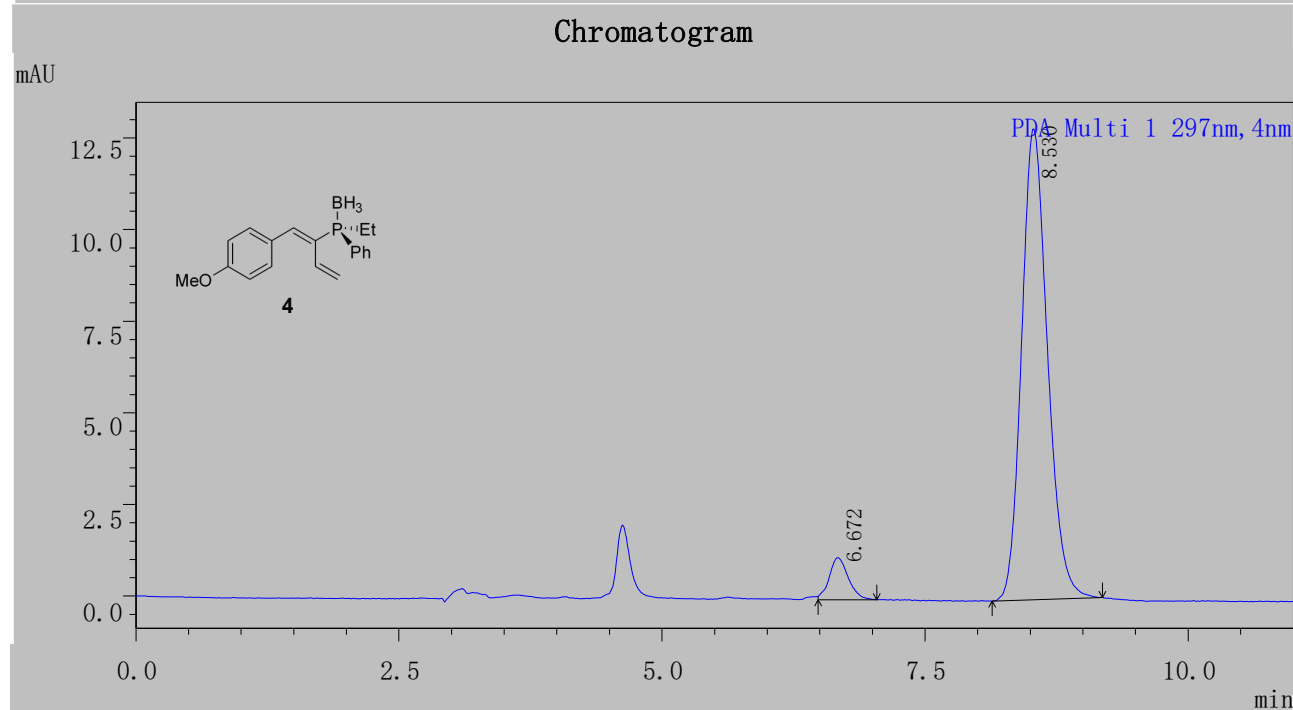

PDA Ch1 297nm

| Peak#        | Ret. Time | Area          | Area%          |
|--------------|-----------|---------------|----------------|
| 1            | 6.672     | 14235         | 6.071          |
| 2            | 8.530     | 220232        | 93.929         |
| <b>Total</b> |           | <b>234467</b> | <b>100.000</b> |



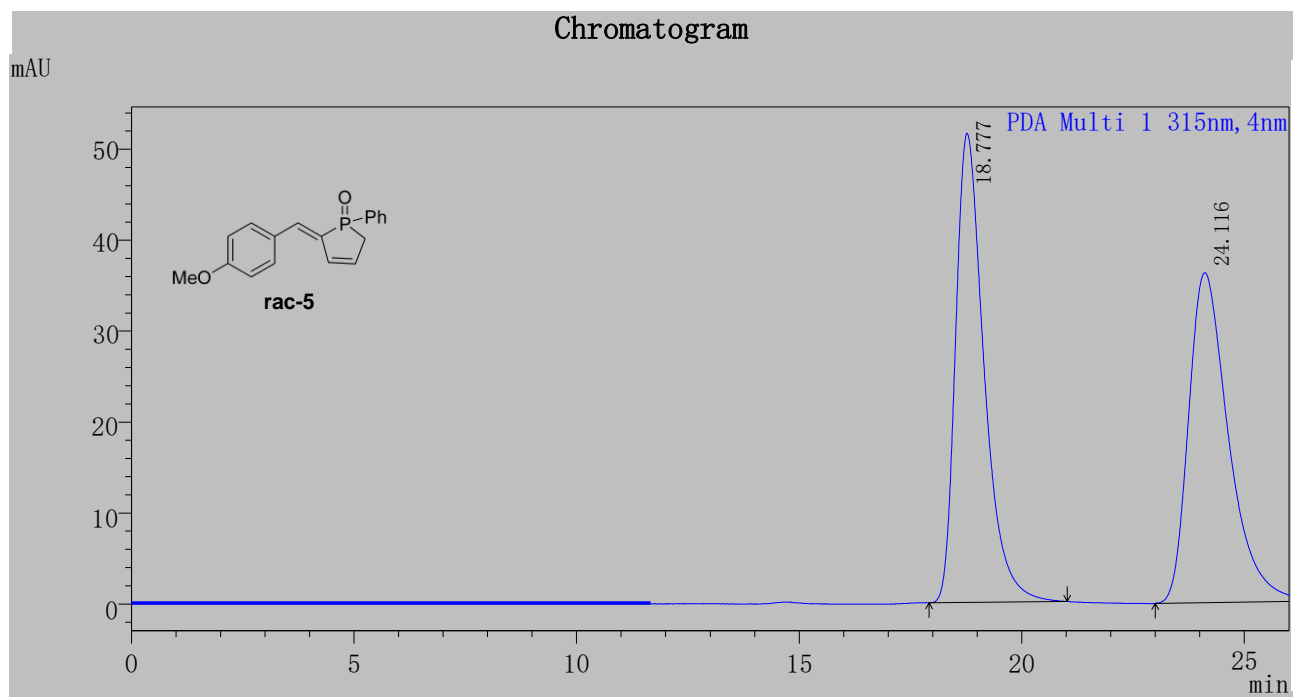

PDA Ch1 315nm

| Peak#        | Ret. Time | Area           | Area%          |
|--------------|-----------|----------------|----------------|
| 1            | 18.777    | 2290014        | 50.282         |
| 2            | 24.116    | 2264314        | 49.718         |
| <b>Total</b> |           | <b>4554328</b> | <b>100.000</b> |

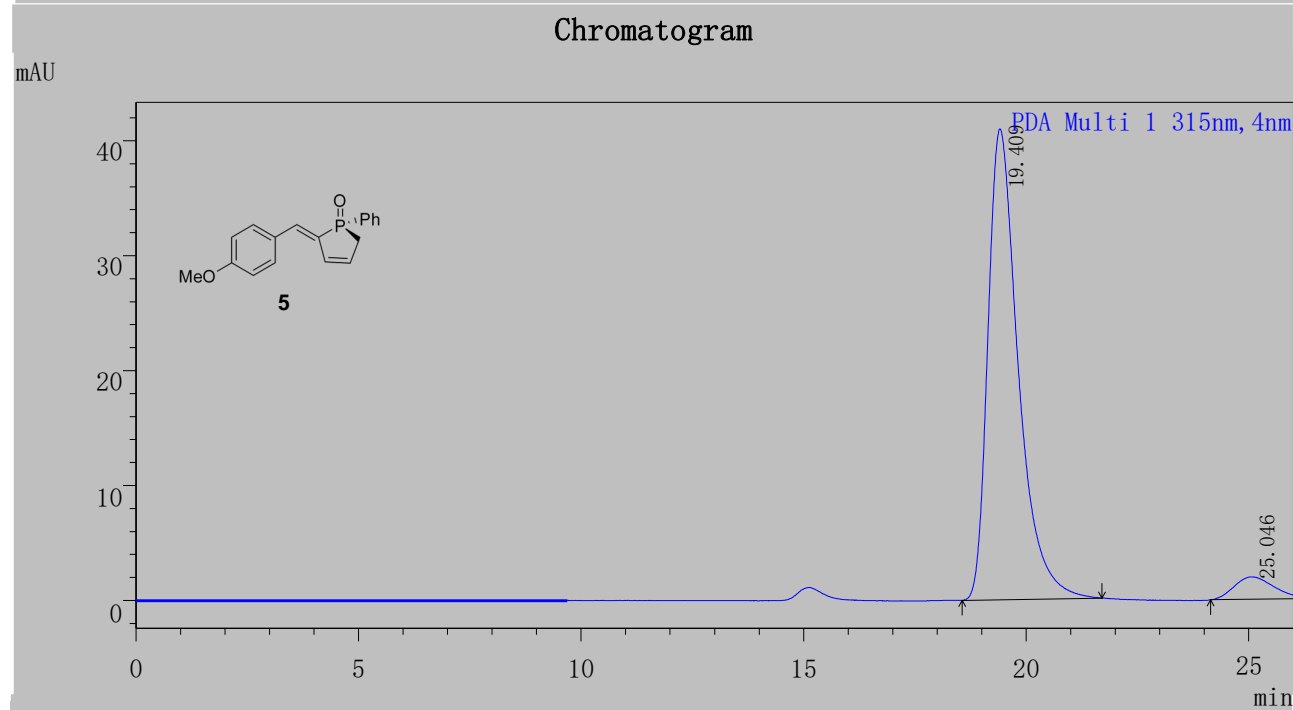

PDA Ch1 315nm

| Peak#        | Ret. Time | Area           | Area%          |
|--------------|-----------|----------------|----------------|
| 1            | 19.409    | 1942185        | 94.131         |
| 2            | 25.046    | 121100         | 5.869          |
| <b>Total</b> |           | <b>2063285</b> | <b>100.000</b> |
